# Supplementary material
Source: PubMed Central journal article supplement (PMC4349976)
Supplement: supp_M114.040576_mcp.M114.040576-2.pdf [file supp_M114.040576_mcp.M114.040576-2.pdf]

Suppl Table 1. Peptides with quantitative alterations of PD versus control subjects compiled from our previous proteomic profiling studies in human/monkey brain or CSF

| IPI Accession No. | Protein Description                                                            | Peptide Sequence*    | Primary Source Dataset** |
|-------------------|--------------------------------------------------------------------------------|----------------------|--------------------------|
| IP100014849       | [Pyruvate dehydrogenase (lipoamide)] kinase isozyme 3, mitochondrial precursor | TTPEADDWSNFSSEPR     | e                        |
| IP100220362       | 10 kDa heat shock protein, mitochondrial                                       | DYFLFR               | d                        |
| IP100220362       | 10 kDa heat shock protein, mitochondrial                                       | GGEIQPVSVK           | c; d; e                  |
| IP100220362       | 10 kDa heat shock protein, mitochondrial                                       | GGIMLPEK             | d                        |
| IP100220362       | 10 kDa heat shock protein, mitochondrial                                       | SAAETVTK             | c; d; e                  |
| IP100220362       | 10 kDa heat shock protein, mitochondrial                                       | VLLPEYGGTK           | d; e                     |
| IP100220362       | 10 kDa heat shock protein, mitochondrial                                       | VLQATVVVYVSGSGK      | d                        |
| IP100220362       | 10 kDa heat shock protein, mitochondrial                                       | VVLDKDYFLFR          | c; d; e                  |
| IP100477382       | 101 kDa protein                                                                | RPGGRGTAAGRRCR       | a                        |
| IP100477382       | 101 kDa protein                                                                | SQRLSRRPGR           | a                        |
| IP100477372       | 102 kDa protein                                                                | VIFGEENR             | a                        |
| IP100476999       | 107 kDa protein                                                                | AEDHFSVDFNQNR        | a                        |
| IP100476999       | 107 kDa protein                                                                | AHGLIGQFMQEPK        | a                        |
| IP100476999       | 107 kDa protein                                                                | FQLVAENR             | a                        |
| IP100290553       | 10-formyltetrahydrofolate dehydrogenase                                        | FLFPEGIK             | d                        |
| IP100290553       | 10-formyltetrahydrofolate dehydrogenase                                        | MILLASNFK            | d                        |
| IP100645321       | 11 kDa protein                                                                 | TLVMLDEQGEQLER       | c; e                     |
| IP100472558       | 110 kDa protein                                                                | QENTQTEQK            | d                        |
| IP100477003       | 111 kDa protein                                                                | ELEVQR               | a                        |
| IP100477003       | 111 kDa protein                                                                | MLLAPQGR             | a                        |
| IP100478549       | 112 kDa protein                                                                | AGMQLNLEELQK         | a                        |
| IP100478549       | 112 kDa protein                                                                | QILETMQNDRTTISR      | a                        |
| IP100479566       | 113 kDa protein                                                                | GAQLAER              | a                        |
| IP100479566       | 113 kDa protein                                                                | GLNVLDLGLNMEILEEQM   | a                        |
| IP100479566       | 113 kDa protein                                                                | NIVMHLPLPTK          | a                        |
| IP100479566       | 113 kDa protein                                                                | VFHLSAFRHPR          | a                        |
| IP100748339       | 114 kDa protein                                                                | ATSAALPQQR           | d                        |
| IP100178515       | 116 kDa protein                                                                | VMSDYSLLK            | a                        |
| IP100412995       | 118 kDa protein                                                                | DKSIRMR              | a                        |
| IP100412995       | 118 kDa protein                                                                | DLNAVQLQLLAPEMMK     | a                        |
| IP100412995       | 118 kDa protein                                                                | FYPSPR               | a                        |
| IP100477394       | 118 kDa protein                                                                | LITEK                | a                        |
| IP100412995       | 118 kDa protein                                                                | QKLQTTQAPSLQK        | a                        |
| IP100477394       | 118 kDa protein                                                                | RQSAPSPTRVAVVAPMS    | a                        |
| IP100643613       | 12 kDa protein                                                                 | EYIEHTSSIK           | d                        |
| IP100647579       | 12 kDa protein                                                                 | MDSLHKAVK            | d                        |
| IP100477183       | 12 kDa protein                                                                 | MMHILGVICAIHLIIHVFSG | a                        |
| IP100176698       | 12 kDa protein                                                                 | TGQAPGVSYTAANK       | c; d; e                  |
| IP100478330       | 129 kDa protein                                                                | NATASLWSGPGLEDR      | a                        |
| IP100749470       | 13 kDa protein                                                                 | GAAGALLYDITR         | d; e                     |
| IP100176854       | 13 kDa protein                                                                 | NIVEAAVR             | d                        |
| IP100329745       | 130 kDa leucine-rich protein                                                   | AKYESDMVTGGYALINL    | a                        |
| IP100329745       | 130 kDa leucine-rich protein                                                   | GDIDHVK              | a                        |
| IP100329745       | 130 kDa leucine-rich protein                                                   | KHETPGIR             | a                        |
| IP100329745       | 130 kDa leucine-rich protein                                                   | LVEKGETDLQK          | a                        |
| IP100329745       | 130 kDa leucine-rich protein                                                   | MNVKIPENIYR          | a                        |
| IP100329745       | 130 kDa leucine-rich protein                                                   | TKDLPVTEAVSALVTGH    | a                        |
| IP100480123       | 130 kDa protein                                                                | GDITDTEHTTIR         | a                        |
| IP100385501       | 130 kDa protein                                                                | GMRGRGLGGK           | a                        |
| IP100480123       | 130 kDa protein                                                                | LTANHLNGQK           | a                        |
| IP100332067       | 131 kDa protein                                                                | FLILLTDGVAQDDVR      | a                        |
| IP100332067       | 131 kDa protein                                                                | LGILMSYSNSAK         | a                        |
| IP100332067       | 131 kDa protein                                                                | NLLTK                | a                        |
| IP100412845       | 132 kDa protein                                                                | GAAPRSLRDPK          | a                        |
| IP100477893       | 132 kDa protein                                                                | KMNSSEFHSAAK         | a                        |
| IP100479713       | 139 kDa protein                                                                | ILVTPR               | a                        |
| IP100005966       | 13kDa differentiation-associated protein variant (Fragment)                    | FNVTGTEQVYVYSTTR     | d; e                     |
| IP100299977       | 14 kDa phosphohistidine phosphatase                                            | YPPDYETVANDGY        | e                        |
| IP100477876       | 140 kDa protein                                                                | DLMNSEVICSVK         | a                        |
| IP100479467       | 140 kDa protein                                                                | ERVDELTTDLEILK       | a                        |
| IP100479467       | 140 kDa protein                                                                | ETELELR              | a                        |
| IP100477876       | 140 kDa protein                                                                | ISAPATER             | a                        |
| IP100477876       | 140 kDa protein                                                                | RGDTVYILR            | a                        |
| IP100477876       | 140 kDa protein                                                                | LISELLPDVPERNSLR     | a                        |
| IP100479467       | 140 kDa protein                                                                | NLNLEEKVR            | a                        |
| IP100479467       | 140 kDa protein                                                                | SKMQEQQADLQRR        | a                        |
| IP100479467       | 140 kDa protein                                                                | SLSDTVEKIK           | a                        |
| IP100477876       | 140 kDa protein                                                                | SSTEKPPGRR           | a                        |
| IP100472759       | 141 kDa protein                                                                | EHMDAINHDTK          | a                        |
| IP100472759       | 141 kDa protein                                                                | MEDIER               | a                        |
| IP100472759       | 141 kDa protein                                                                | VHQGFR               | a                        |
| IP100000816       | 14-3-3 protein epsilon                                                         | DNLLTLWTSMDQGDGEEQNK | d; e                     |
| IP100000816       | 14-3-3 protein epsilon                                                         | EAAENSLVAYK          | c; d; e                  |
| IP100000816       | 14-3-3 protein epsilon                                                         | EALQDVEDENQ          | c; d; e                  |
| IP100000816       | 14-3-3 protein epsilon                                                         | EDLVYQAK             | d                        |
| IP100000816       | 14-3-3 protein epsilon                                                         | EENKGGEDK            | c; d                     |
| IP100000816       | 14-3-3 protein epsilon                                                         | IISSEQK              | d; e                     |
| IP100000816       | 14-3-3 protein epsilon                                                         | QMVETELK             | c; d; e                  |
| IP100000816       | 14-3-3 protein epsilon                                                         | VAGMDVELTVEER        | d                        |
| IP100000816       | 14-3-3 protein epsilon                                                         | VFYRK                | c; d                     |
| IP100000816       | 14-3-3 protein epsilon                                                         | YDEMVESMK            | c; d; e                  |
| IP100000816       | 14-3-3 protein epsilon                                                         | YLAEFATGNDR          | d; e                     |
| IP100216319       | 14-3-3 protein eta                                                             | AVTELNEPLSNEDR       | d; e                     |
| IP100216319       | 14-3-3 protein eta                                                             | DNLLTLWTSQDQDEEAGEGN | e                        |
| IP100216319       | 14-3-3 protein eta                                                             | EAFEISK              | d; e                     |
| IP100216319       | 14-3-3 protein eta                                                             | EQMQPHTPIR           | d; e                     |
| IP100216319       | 14-3-3 protein eta                                                             | QAFDDAIAELDTLNEDSYK  | d; e                     |
| IP100216319       | 14-3-3 protein eta                                                             | TMADGNEK             | c; d                     |
| IP100216319       | 14-3-3 protein eta                                                             | YDDMASAMK            | c                        |
| IP100220642       | 14-3-3 protein gamma                                                           | ATVYESSEK            | c; d; e                  |
| IP100220642       | 14-3-3 protein gamma                                                           | AYSEAEISK            | c; e                     |
| IP100220642       | 14-3-3 protein gamma                                                           | DNLLTLWTSQDQDDGGEGNN | c; e                     |
| IP100220642       | 14-3-3 protein gamma                                                           | DSITLMQLLR           | c; d; e                  |
| IP100220642       | 14-3-3 protein gamma                                                           | EHMQPHTPIR           | c                        |

| IPI Accession No. | Protein Description                        | Peptide Sequence*          | Primary Source Dataset** |
|-------------------|--------------------------------------------|----------------------------|--------------------------|
| IPI00220642       | 14-3-3 protein gamma                       | EKIEK                      | c                        |
| IPI00220642       | 14-3-3 protein gamma                       | EQLVQK                     | c; d; e                  |
| IPI00220642       | 14-3-3 protein gamma                       | KIEMVR                     | c                        |
| IPI00220642       | 14-3-3 protein gamma                       | NCSETQYESK                 | c; d                     |
| IPI00220642       | 14-3-3 protein gamma                       | NLSVAYK                    | c; d; e                  |
| IPI00220642       | 14-3-3 protein gamma                       | NVTELNEPLSNEER             | c; d; e                  |
| IPI00220642       | 14-3-3 protein gamma                       | TAFDDAIAELDTLNEDSYK        | c; d; e                  |
| IPI00220642       | 14-3-3 protein gamma                       | VISSIFQK                   | c; d; e                  |
| IPI00220642       | 14-3-3 protein gamma                       | YDDMAAAMK                  | c; d; e                  |
| IPI00220642       | 14-3-3 protein gamma                       | YLAEVATGEK                 | e                        |
| IPI00018146       | 14-3-3 protein theta                       | AVTEQGAELSNEER             | c; d; e                  |
| IPI00018146       | 14-3-3 protein theta                       | EKVESELR                   | c                        |
| IPI00018146       | 14-3-3 protein theta                       | NVVGGR                     | d                        |
| IPI00018146       | 14-3-3 protein theta                       | TAFDEAIAELDTLNEDSYK        | d                        |
| IPI00018146       | 14-3-3 protein theta                       | YDDMATCMK                  | c                        |
| IPI00021263       | 14-3-3 protein zeta/delta                  | ACSLAK                     | d                        |
| IPI00021263       | 14-3-3 protein zeta/delta                  | DICNDVLSLEK                | d; e                     |
| IPI00021263       | 14-3-3 protein zeta/delta                  | DNLLTLWTSIDTQGDDEAEAGEGGEN | e                        |
| IPI00021263       | 14-3-3 protein zeta/delta                  | EKIETELR                   | d                        |
| IPI00021263       | 14-3-3 protein zeta/delta                  | FLIPNASQAESK               | d; e                     |
| IPI00021263       | 14-3-3 protein zeta/delta                  | GDYYR                      | c; d                     |
| IPI00021263       | 14-3-3 protein zeta/delta                  | GIVDQSQAYQEAFEISK          | c; d; g                  |
| IPI00021263       | 14-3-3 protein zeta/delta                  | KEMQPTPIR                  | c; d                     |
| IPI00021263       | 14-3-3 protein zeta/delta                  | LAEQAER                    | c; d; e                  |
| IPI00021263       | 14-3-3 protein zeta/delta                  | NELVQK                     | d                        |
| IPI00021263       | 14-3-3 protein zeta/delta                  | NVVGAR                     | c; d; e                  |
| IPI00021263       | 14-3-3 protein zeta/delta                  | TAFDEAIAELDTLSEESYK        | d; e                     |
| IPI00021263       | 14-3-3 protein zeta/delta                  | VFYLK                      | c; d; e                  |
| IPI00021263       | 14-3-3 protein zeta/delta                  | VVSSIEQK                   | c; d; e                  |
| IPI00021263       | 14-3-3 protein zeta/delta                  | YDDMAACMK                  | c; d; e                  |
| IPI00021263       | 14-3-3 protein zeta/delta                  | YLAEVAAGDDK                | c; d                     |
| IPI00021263       | 14-3-3 protein zeta/delta                  | YLAEVAAGDDKK               | c; d                     |
| IPI0055576        | 145 kDa protein                            | QGRDLR                     | e                        |
| IPI00742905       | 146 kDa protein                            | NFLYAWCGK                  | d                        |
| IPI00479545       | 148 kDa protein                            | WIEVYSLLR                  | c                        |
| IPI00748984       | 15 kDa protein                             | AGAHLEGGAK                 | c; d                     |
| IPI00643237       | 15 kDa protein                             | IFYDMK                     | d                        |
| IPI00000877       | 150 kDa oxygen-regulated protein precursor | DAVVYPLVEFTR               | d; e                     |
| IPI00742844       | 156 kDa protein                            | ADILFDGDDAISYR             | d                        |
| IPI00742844       | 156 kDa protein                            | AVATQGSFNSWDVTR            | e                        |
| IPI00742844       | 156 kDa protein                            | DQNLPHLEESR                | e                        |
| IPI00742844       | 156 kDa protein                            | GCIEVFNRR                  | e                        |
| IPI00742844       | 156 kDa protein                            | LLNTAGGYPSFWIGR            | e                        |
| IPI00742844       | 156 kDa protein                            | NEEQHFYWGGSQPIQR           | e                        |
| IPI00742844       | 156 kDa protein                            | SLGASSYSLLTAPR             | e                        |
| IPI00742844       | 156 kDa protein                            | YMETGVIDPEIQR              | e                        |
| IPI00742844       | 156 kDa protein                            | YNLQSLR                    | e                        |
| IPI00742844       | 156 kDa protein                            | YNTPGFNGCLSGVR             | e                        |
| IPI00479631       | 159 kDa protein                            | MAAVPQNNLQELERHS           | a                        |
| IPI00479631       | 159 kDa protein                            | MNMLR                      | a                        |
| IPI00479631       | 159 kDa protein                            | NESYFPGNVTSTAVKD           | a                        |
| IPI00479631       | 159 kDa protein                            | THLEDER                    | a                        |
| IPI00748231       | 160 kDa protein                            | DAADFLK                    | c                        |
| IPI00479089       | 162 kDa protein                            | CKALQDIQK                  | a                        |
| IPI00479089       | 162 kDa protein                            | QLGEAHGRLLK                | a                        |
| IPI00479089       | 162 kDa protein                            | RVSELEK                    | a                        |
| IPI00477094       | 165 kDa protein                            | DFISKTPK                   | a                        |
| IPI00217225       | 165 kDa protein                            | MNLDMR                     | a                        |
| IPI00477094       | 165 kDa protein                            | QMLRDFVTTSPALK             | a                        |
| IPI00217225       | 165 kDa protein                            | QVFGSK                     | a                        |
| IPI00217225       | 165 kDa protein                            | VRFNSVSSYSDSQK             | a                        |
| IPI00217225       | 165 kDa protein                            | YNILEEVAK                  | a                        |
| IPI00472327       | 168 kDa protein                            | NLMASIERAR                 | a                        |
| IPI00472327       | 168 kDa protein                            | QLTSDVER                   | a                        |
| IPI00479803       | 168 kDa protein                            | QMNENFYK                   | a                        |
| IPI00472327       | 168 kDa protein                            | SSDGTYHTSK                 | a                        |
| IPI00472327       | 168 kDa protein                            | VEISEGLGHVSLQK             | a                        |
| IPI00640188       | 17 kDa protein                             | ALDDFVLGSAR                | e                        |
| IPI00744444       | 17 kDa protein                             | ALGQNPTNAEVLK              | e                        |
| IPI00742753       | 17 kDa protein                             | EGCCMVGVAR                 | e                        |
| IPI00642948       | 17 kDa protein                             | NANAEPAVQR                 | c                        |
| IPI00477053       | 171 kDa protein                            | ALLSKYK                    | a                        |
| IPI00477053       | 171 kDa protein                            | DFLSKTPK                   | a                        |
| IPI00477053       | 171 kDa protein                            | YHLTPVRMVIK                | a                        |
| IPI00478321       | 177 kDa protein                            | DFTQDYDCTKSISSPYPK         | a                        |
| IPI00478321       | 177 kDa protein                            | NHDELK                     | a                        |
| IPI00478321       | 177 kDa protein                            | VQKKSRYR                   | a                        |
| IPI00657796       | 18 kDa protein                             | KDVLETFYVK                 | d                        |
| IPI00549557       | 18 kDa protein                             | NTEDLTEEWLR                | d                        |
| IPI00471928       | 18 kDa protein                             | VLSIGDGIAR                 | c; d; e                  |
| IPI00549557       | 18 kDa protein                             | YQHDDGR                    | d                        |
| IPI00413160       | 183 kDa protein                            | ASSPPRAPEPSLLFQDL          | a                        |
| IPI00413160       | 183 kDa protein                            | EIEQLKEHLR                 | a                        |
| IPI00413160       | 183 kDa protein                            | ENPRITCARR                 | a                        |
| IPI00413160       | 183 kDa protein                            | SSCELEVLLR                 | a                        |
| IPI00477611       | 184 kDa protein                            | AGSDGARGMPGQTGPK           | a                        |
| IPI00477611       | 184 kDa protein                            | GETGFQK                    | a                        |
| IPI00477611       | 184 kDa protein                            | RGPPGPAGPEGR               | a                        |
| IPI00479904       | 187 kDa protein                            | DGQAGQQEQGDDGDP            | a                        |
| IPI00479904       | 187 kDa protein                            | GSRGSLGPTGAPGR             | a                        |
| IPI00479904       | 187 kDa protein                            | GYPRGQLPGVPVGDG            | a                        |
| IPI00479904       | 187 kDa protein                            | TVVHLGSRK                  | a                        |
| IPI00479904       | 187 kDa protein                            | WHQTLFTFR                  | a                        |
| IPI00640741       | 19 kDa protein                             | LVQAFQTDK                  | c; d; e                  |
| IPI00640741       | 19 kDa protein                             | QITVNDLPVGR                | c; d                     |
| IPI00181341       | 19 kDa protein                             | RCARSWR                    | a                        |
| IPI00640741       | 19 kDa protein                             | SVDETLR                    | d                        |

| IPI Accession No. | Protein Description                                | Peptide Sequence*                 | Primary Source Dataset** |
|-------------------|----------------------------------------------------|-----------------------------------|--------------------------|
| IPI00642792       | 19 kDa protein                                     | TGQEIPIVNR                        | c; e                     |
| IPI00640741       | 19 kDa protein                                     | TIAQDYGVLK                        | c; d; e                  |
| IPI00398055       | 19 kDa protein                                     | VIIHDSR                           | d                        |
| IPI00016956       | 1-acyl-sn-glycerol-3-phosphate                     | DYFEK                             | a                        |
| IPI00016956       | 1-acyl-sn-glycerol-3-phosphate                     | ENAIIVLNHK                        | a                        |
| IPI00016956       | 1-acyl-sn-glycerol-3-phosphate                     | HHLLPRTK                          | a                        |
| IPI00329185       | 1-phosphatidylinositol-4,5-bisphosphate            | DGAFLIRK                          | a                        |
| IPI00329185       | 1-phosphatidylinositol-4,5-bisphosphate            | KDSVFLGNTDRPDASA                  | a                        |
| IPI00329185       | 1-phosphatidylinositol-4,5-bisphosphate            | QKPVLLKYNQKGLTR                   | a                        |
| IPI00329185       | 1-phosphatidylinositol-4,5-bisphosphate            | YYLTDNLTFSSYLIQHY                 | a                        |
| IPI00215979       | 2,3-bisphosphoglycerate mutase                     | LIMLR                             | a                        |
| IPI00003482       | 2,4-dienoyl-CoA reductase, mitochondrial precursor | EQWDTEIELR                        | d; e                     |
| IPI00003482       | 2,4-dienoyl-CoA reductase, mitochondrial precursor | FFSPLQK                           | d                        |
| IPI00397828       | 20 kDa protein                                     | LGGEAGLEGYLFEER                   | c; d                     |
| IPI00385137       | 20 kDa protein                                     | TTTTTTSSSGLGSPMIVGSPR             | e                        |
| IPI00010728       | 203 kDa protein                                    | ADVQMEFIQGPK                      | e                        |
| IPI00010728       | 203 kDa protein                                    | APQEADAFMGVESHMK                  | d                        |
| IPI00479529       | 203 kDa protein                                    | DIESLMSSEGNK                      | a                        |
| IPI00010728       | 203 kDa protein                                    | DLATDLSLIEVK                      | d                        |
| IPI00010728       | 203 kDa protein                                    | DMQGTTEEK                         | d                        |
| IPI00010728       | 203 kDa protein                                    | DQGGAGEGLVR                       | d                        |
| IPI00010728       | 203 kDa protein                                    | DITFSPGQEPILTEK                   | e                        |
| IPI00010728       | 203 kDa protein                                    | DWFHEMPTKAK                       | d                        |
| IPI00010728       | 203 kDa protein                                    | EAINQETVQQR                       | c; d; e                  |
| IPI00479529       | 203 kDa protein                                    | EAQLLEMR                          | a                        |
| IPI00010728       | 203 kDa protein                                    | EAVPK                             | d                        |
| IPI00010728       | 203 kDa protein                                    | EEEQIEK                           | d                        |
| IPI00010728       | 203 kDa protein                                    | EFDOEK                            | c; d                     |
| IPI00010728       | 203 kDa protein                                    | EKDVFDIPK                         | d                        |
| IPI00010728       | 203 kDa protein                                    | ESQSPPAQEAEGYSTLAQSYPSDLPEEPSPQER | c; h                     |
| IPI00010728       | 203 kDa protein                                    | ETAEEVSAR                         | d                        |
| IPI00010728       | 203 kDa protein                                    | FAALEQPEVER                       | d; e                     |
| IPI00010728       | 203 kDa protein                                    | HAALVSQPETTK                      | d                        |
| IPI00010728       | 203 kDa protein                                    | IGSTDNIK                          | d                        |
| IPI00010728       | 203 kDa protein                                    | ISDFGQMASGLNIDDR                  | e                        |
| IPI00010728       | 203 kDa protein                                    | IVQVVTAEVAVLK                     | d                        |
| IPI00010728       | 203 kDa protein                                    | KDEWGLVAPISPGPLTPMR               | d                        |
| IPI00010728       | 203 kDa protein                                    | LSVEIPCPAPVSEADLATDER             | d; e                     |
| IPI00010728       | 203 kDa protein                                    | MEFHQQELTPSTAEPSQK                | d                        |
| IPI00010728       | 203 kDa protein                                    | SDTLOITDLGVSGAR                   | e                        |
| IPI00010728       | 203 kDa protein                                    | SGTSTPTTPGGTALTPTGTPPSYSSR        | d; e; h                  |
| IPI00010728       | 203 kDa protein                                    | SIIEPGSDYVELSDTR                  | d; e                     |
| IPI00010728       | 203 kDa protein                                    | SLQQTSGPATAK                      | d                        |
| IPI00010728       | 203 kDa protein                                    | SVPSETVVEDSR                      | d; e                     |
| IPI00010728       | 203 kDa protein                                    | TPGTPGTPSYPR                      | d; e                     |
| IPI00477336       | 21 kDa protein                                     | EQLGEFVEALDCLR                    | a; b; d; e               |
| IPI00639976       | 21 kDa protein                                     | QAESASEAAK                        | d; e                     |
| IPI00477336       | 21 kDa protein                                     | SDVVYTDWK                         | a                        |
| IPI00477336       | 21 kDa protein                                     | TEDTFLR                           | a                        |
| IPI00477336       | 21 kDa protein                                     | WFYIASAFR                         | a; c; d; e               |
| IPI00658089       | 22 kDa protein                                     | DWVIPPINLPENSR                    | e                        |
| IPI00335132       | 22 kDa protein                                     | GKPDAAK                           | c; d                     |
| IPI00514876       | 223 kDa protein                                    | QLEAEK                            | c                        |
| IPI00413175       | 228 kDa protein                                    | RPGETSLHPYR                       | a                        |
| IPI00642178       | 23 kDa protein                                     | EFENLYIENLELR                     | d; e                     |
| IPI00745420       | 23 kDa protein                                     | QYDGFYEFER                        | c                        |
| IPI00642178       | 23 kDa protein                                     | STLLELFGQIER                      | e                        |
| IPI00478601       | 233 kDa protein                                    | EIRLLGR                           | a                        |
| IPI00478601       | 233 kDa protein                                    | GQNLDVVQTPR                       | a                        |
| IPI00478601       | 233 kDa protein                                    | LGKRDSPNK                         | a                        |
| IPI00478601       | 233 kDa protein                                    | NQIQLNLESSVRDR                    | a                        |
| IPI00647915       | 24 kDa protein                                     | GASQAGMTGYGMPR                    | c; d                     |
| IPI00646289       | 25 kDa protein                                     | DFQPYFK                           | d                        |
| IPI00513722       | 25 kDa protein                                     | SIPMTVDFIR                        | c                        |
| IPI00644515       | 25 kDa protein                                     | SWEEQMIEVGR                       | e                        |
| IPI00513722       | 25 kDa protein                                     | SYCNDQSTGDIK                      | c; d                     |
| IPI00513722       | 25 kDa protein                                     | VFPHGLIMDR                        | c; d                     |
| IPI00646289       | 25 kDa protein                                     | VNLLSVLEAAK                       | d; e                     |
| IPI00015864       | 2-5A-dependent ribonuclease                        | GASTDCGLVMTARR                    | a                        |
| IPI00015864       | 2-5A-dependent ribonuclease                        | QEVAVKTFCEGSPR                    | a                        |
| IPI00015864       | 2-5A-dependent ribonuclease                        | TKEDQERLR                         | a                        |
| IPI00002405       | 2'-5'-oligoadenylate synthetase 3                  | AIDILR                            | a                        |
| IPI00002405       | 2'-5'-oligoadenylate synthetase 3                  | DSQFNMAEGFR                       | a                        |
| IPI00002405       | 2'-5'-oligoadenylate synthetase 3                  | SLNAVYPR                          | a                        |
| IPI00002405       | 2'-5'-oligoadenylate synthetase 3                  | VVRGGSSAK                         | a                        |
| IPI00657744       | 26 kDa protein                                     | FIIHAPPGEFNEFNDVDR                | e                        |
| IPI00639805       | 26 kDa protein                                     | LLLEVTDSYEEK                      | c; d                     |
| IPI00639805       | 26 kDa protein                                     | QWFLGDK                           | d                        |
| IPI00641565       | 26 kDa protein                                     | VFEFGGPEVLK                       | c; d                     |
| IPI00018398       | 26S protease regulatory subunit 6A                 | DSLILLETLPTEDSR                   | e                        |
| IPI00013297       | 28 kDa heat- and acid-stable phosphoprotein        | SLDSESEDEDDYQKQ                   | e                        |
| IPI00646556       | 28 kDa protein                                     | DTPENNPDTPFDFTPENYK               | d                        |
| IPI00646556       | 28 kDa protein                                     | DTPENNPDTPFDFTPENYKR              | e                        |
| IPI00180776       | 28 kDa protein                                     | EMQPTHPIR                         | d; e                     |
| IPI00646556       | 28 kDa protein                                     | GGFGVQAGL                         | d; e                     |
| IPI00645711       | 28 kDa protein                                     | LCYDPDFEK                         | d                        |
| IPI00645711       | 28 kDa protein                                     | MAVWGKN                           | d                        |
| IPI00645711       | 28 kDa protein                                     | NQVFEPSCLDAPFNK                   | d                        |
| IPI00645711       | 28 kDa protein                                     | SQWLNEK                           | d                        |
| IPI00180776       | 28 kDa protein                                     | SVTEGGAELSNEER                    | c; d; e; g               |
| IPI00180776       | 28 kDa protein                                     | TEGAEK                            | c; d                     |
| IPI00646556       | 28 kDa protein                                     | VAEVLQVPPMR                       | e                        |
| IPI00478292       | 285 kDa protein                                    | ADVVESWIGEK                       | d; e                     |
| IPI00478292       | 285 kDa protein                                    | AINVQEEK                          | c; d                     |
| IPI00478292       | 285 kDa protein                                    | ALINADELASDVAGAEALLDR             | d                        |
| IPI00478292       | 285 kDa protein                                    | AQLADSFHLQOFFR                    | d; e                     |
| IPI00478292       | 285 kDa protein                                    | ASAFNSWFENAEEDLTPVR               | d; e                     |

| IPI Accession No. | Protein Description | Peptide Sequence*             | Primary Source Dataset** |
|-------------------|---------------------|-------------------------------|--------------------------|
| IPI00478292       | 285 kDa protein     | CTELNQAWSSLGK                 | e                        |
| IPI00478292       | 285 kDa protein     | DAEELK                        | d                        |
| IPI00478292       | 285 kDa protein     | DCEQAENWMAAR                  | c; d; e                  |
| IPI00478292       | 285 kDa protein     | DLASVQALLR                    | d; e                     |
| IPI00478292       | 285 kDa protein     | DLIGVQNLK                     | d                        |
| IPI00478292       | 285 kDa protein     | DLMSWINGIR                    | e                        |
| IPI00478292       | 285 kDa protein     | DLTGVQNLN                     | d; e                     |
| IPI00478292       | 285 kDa protein     | DLTSVQNLQK                    | d; e                     |
| IPI00478292       | 285 kDa protein     | DSDELK                        | c                        |
| IPI00478292       | 285 kDa protein     | DTEQVDNWSMK                   | c; d; e                  |
| IPI00478292       | 285 kDa protein     | DVDEEAWISEK                   | d; e                     |
| IPI00478292       | 285 kDa protein     | DVDETSWIK                     | e                        |
| IPI00478292       | 285 kDa protein     | DVEDEETWIR                    | d; e                     |
| IPI00478292       | 285 kDa protein     | DVTGAEALLER                   | c; d                     |
| IPI00478292       | 285 kDa protein     | EAALTSEEVGADLEQVEVLQK         | d                        |
| IPI00478292       | 285 kDa protein     | EANELQQWINEK                  | d; e                     |
| IPI00478292       | 285 kDa protein     | EANQQQFENR                    | d; e                     |
| IPI00478292       | 285 kDa protein     | ECEDVMDVINDK                  | d                        |
| IPI00478292       | 285 kDa protein     | EELYQNLTR                     | d                        |
| IPI00478292       | 285 kDa protein     | EFSMMFK                       | c; d; e                  |
| IPI00478292       | 285 kDa protein     | EKEPIAASTNR                   | c; d                     |
| IPI00478292       | 285 kDa protein     | EKEQLMASDDFGR                 | d; e                     |
| IPI00478292       | 285 kDa protein     | ELPTAFDYVEPTR                 | c; d                     |
| IPI00478292       | 285 kDa protein     | ENLLEEQGSIALR                 | e                        |
| IPI00478292       | 285 kDa protein     | EQAQSCR                       | c; e                     |
| IPI00478292       | 285 kDa protein     | ETENVK                        | d                        |
| IPI00478292       | 285 kDa protein     | EVTMK                         | c                        |
| IPI00478292       | 285 kDa protein     | EWIEEK                        | d; e                     |
| IPI00478292       | 285 kDa protein     | FLADFR                        | c; d; e                  |
| IPI00478292       | 285 kDa protein     | FLSDFR                        | d                        |
| IPI00478292       | 285 kDa protein     | FMLFR                         | d                        |
| IPI00478292       | 285 kDa protein     | FQFFQR                        | d; e                     |
| IPI00478292       | 285 kDa protein     | GACAGSEDAVK                   | c; d                     |
| IPI00478292       | 285 kDa protein     | GEIDAHEDSFK                   | d                        |
| IPI00478292       | 285 kDa protein     | GNAMVEEGHFAEDVK               | c; d; e                  |
| IPI00478292       | 285 kDa protein     | GVIDMGNLSIER                  | e                        |
| IPI00478292       | 285 kDa protein     | HQAFEELSANQSR                 | d; e                     |
| IPI00478292       | 285 kDa protein     | IAALQAFADQLIAAGHYAK           | d                        |
| IPI00478292       | 285 kDa protein     | IDGITQAR                      | d                        |
| IPI00478292       | 285 kDa protein     | ITALDEFATK                    | c; d; e                  |
| IPI00478292       | 285 kDa protein     | KFDDFQK                       | d                        |
| IPI00478292       | 285 kDa protein     | KFEFFQIDMAAHEER               | c; d                     |
| IPI00478292       | 285 kDa protein     | KVEDLFLTFAK                   | d                        |
| IPI00478292       | 285 kDa protein     | LAALADQWQFLVQK                | d; e                     |
| IPI00478292       | 285 kDa protein     | LDENSAFLQFNWK                 | d                        |
| IPI00478292       | 285 kDa protein     | LDETGNLMISEGHFASETIR          | e                        |
| IPI00478292       | 285 kDa protein     | LEDSYR                        | d                        |
| IPI00478292       | 285 kDa protein     | LFGAAEVQR                     | d                        |
| IPI00478292       | 285 kDa protein     | LGESQTLQQFSR                  | d; e                     |
| IPI00478292       | 285 kDa protein     | LHQFFR                        | c                        |
| IPI00478292       | 285 kDa protein     | LIDVNHYAK                     | c; d; e                  |
| IPI00478292       | 285 kDa protein     | LIQEQHPPEELIK                 | c; d; e                  |
| IPI00478292       | 285 kDa protein     | LIQSNHYAMEDVATR               | d; e                     |
| IPI00478292       | 285 kDa protein     | LIQSHPEAEDLQEK                | c; d                     |
| IPI00478292       | 285 kDa protein     | LLVGSSEYGR                    | d; e                     |
| IPI00478292       | 285 kDa protein     | LMELHR                        | c                        |
| IPI00478292       | 285 kDa protein     | LQIASDENYKDPINLQK             | d; e                     |
| IPI00478292       | 285 kDa protein     | LQQLFR                        | d                        |
| IPI00478292       | 285 kDa protein     | LQQSHPLSATIQVK                | d                        |
| IPI00478292       | 285 kDa protein     | LSDDNTIGKEEIQQR               | c; d                     |
| IPI00478292       | 285 kDa protein     | LVQYLR                        | d; e                     |
| IPI00478292       | 285 kDa protein     | MNEVISLWK                     | d; e                     |
| IPI00478292       | 285 kDa protein     | MQHINLEQQIAR                  | d; e                     |
| IPI00478292       | 285 kDa protein     | MTLVASEDYGDTLAAIQGLLK         | d                        |
| IPI00478292       | 285 kDa protein     | NQALNTDNYGHDLASVQALQR         | d; e                     |
| IPI00478292       | 285 kDa protein     | NTTGVTEALK                    | d; e                     |
| IPI00478292       | 285 kDa protein     | QDEVNAAWQR                    | d                        |
| IPI00478292       | 285 kDa protein     | QEIDNQTR                      | c; d                     |
| IPI00478292       | 285 kDa protein     | QFQDAGHFDAENIK                | c; d; e                  |
| IPI00478292       | 285 kDa protein     | QFQDAGHFDAENIKK               | d                        |
| IPI00478292       | 285 kDa protein     | QGFVPAAYVK                    | e                        |
| IPI00478292       | 285 kDa protein     | QLAAAR                        | e                        |
| IPI00478292       | 285 kDa protein     | QQNFNTGK                      | d                        |
| IPI00478292       | 285 kDa protein     | QQVAPTDEETGK                  | c; d                     |
| IPI00478292       | 285 kDa protein     | QVEELYHSLLELGEK               | d                        |
| IPI00478292       | 285 kDa protein     | QWELLEK                       | d; e                     |
| IPI00478292       | 285 kDa protein     | SADESGQALLAAGHYASDEVIR        | d; e                     |
| IPI00478292       | 285 kDa protein     | SLFVN                         | e                        |
| IPI00478292       | 285 kDa protein     | SLSAQEEK                      | d                        |
| IPI00478292       | 285 kDa protein     | SQLLGSABEVQR                  | e                        |
| IPI00478292       | 285 kDa protein     | SSSLSSAQADFNLALDR             | c; d; e                  |
| IPI00478292       | 285 kDa protein     | SWVNEK                        | c                        |
| IPI00478292       | 285 kDa protein     | TATDEAYKDPINLQK               | d                        |
| IPI00478292       | 285 kDa protein     | TDDYGR                        | d                        |
| IPI00478292       | 285 kDa protein     | TKQDEVNAAWQR                  | c                        |
| IPI00478292       | 285 kDa protein     | VAEDLESEGLMAEEVQAVQQQVEYGMMPR | d                        |
| IPI00478292       | 285 kDa protein     | VASNPTWTMEALEETWR             | d                        |
| IPI00478292       | 285 kDa protein     | VLETAEDIQER                   | d                        |
| IPI00478292       | 285 kDa protein     | VNEVNFQAAK                    | c; d                     |
| IPI00478292       | 285 kDa protein     | VNSLGETAER                    | e                        |
| IPI00478292       | 285 kDa protein     | WEALK                         | d                        |
| IPI00478292       | 285 kDa protein     | YEALKEPMVAR                   | c; e                     |
| IPI00478292       | 285 kDa protein     | YTEHSTVGLAQWQDLDQLGMR         | e                        |
| IPI00177423       | 29 kDa protein      | TQIDHYVGIAR                   | c; d                     |
| IPI00479722       | 29 kDa protein      | VQPEAQAK                      | c                        |
| IPI00396563       | 2B28 protein        | FQLAAVR                       | d                        |
| IPI00747988       | 30 kDa protein      | CQQEGLVPEGGVEEER              | c; d; e                  |

| IPI Accession No. | Protein Description                                       | Peptide Sequence*        | Primary Source Dataset** |
|-------------------|-----------------------------------------------------------|--------------------------|--------------------------|
| IPI00747988       | 30 kDa protein                                            | ELVDGAPLWLLK             | e                        |
| IPI00657752       | 30 kDa protein                                            | QFVDQALQQAVVDDANNK       | d                        |
| IPI00747988       | 30 kDa protein                                            | VEELPGDSGVFEVTHDESVK     | c; d                     |
| IPI00747988       | 30 kDa protein                                            | VLAALPAEELVQACR          | d; e                     |
| IPI00555610       | 313 kDa protein                                           | FSMPGFK                  | d                        |
| IPI00647366       | 32 kDa protein                                            | GTHINPR                  | d                        |
| IPI00647366       | 32 kDa protein                                            | MILLL                    | d                        |
| IPI00641579       | 32 kDa protein                                            | VDQAGK                   | c                        |
| IPI00643653       | 33 kDa protein                                            | DAAQQDAK                 | c                        |
| IPI00643900       | 33 kDa protein                                            | DHFFDR                   | d                        |
| IPI00657666       | 34 kDa protein                                            | DAIGEGK                  | c; d                     |
| IPI00657666       | 34 kDa protein                                            | FSDEGGFTCFRR             | b; d; e                  |
| IPI00657666       | 34 kDa protein                                            | LAGQFLEELR               | c; d; e                  |
| IPI00748721       | 35 kDa protein                                            | DKQDEEQR                 | c; d                     |
| IPI00385699       | 35 kDa protein                                            | EDGNEEDKENQGDTEQQQPPQR   | d                        |
| IPI00291165       | 3'-5' RNA exonuclease                                     | DTGVVVK                  | a                        |
| IPI00479033       | 36 kDa protein                                            | LAEEAER                  | d                        |
| IPI00477931       | 361 kDa protein                                           | MIGLTVGFDK               | a                        |
| IPI00477931       | 361 kDa protein                                           | NDGALLK                  | a                        |
| IPI00477931       | 361 kDa protein                                           | RLYTVR                   | a                        |
| IPI00477931       | 361 kDa protein                                           | RSDDFASAPK               | a                        |
| IPI00335343       | 364 kDa protein                                           | FNSSDLGVAIK              | a                        |
| IPI00335343       | 364 kDa protein                                           | IALLTK                   | a                        |
| IPI00335343       | 364 kDa protein                                           | HRVRSAVEQWLVNVEK         | a                        |
| IPI00478493       | 38 kDa protein                                            | DYAEVGR                  | c                        |
| IPI00478493       | 38 kDa protein                                            | HYEGSTVPEK               | c; d                     |
| IPI00644946       | 38 kDa protein                                            | YQGPVLLIR                | e                        |
| IPI00657698       | 39 kDa protein                                            | AIHSDQEQGR               | c; d; e                  |
| IPI00657698       | 39 kDa protein                                            | FQEKPRR                  | c                        |
| IPI00657698       | 39 kDa protein                                            | TQSPCFGDDDDPAK           | c                        |
| IPI00793234       | 395 kDa protein; MYO15A Myosin-XV                         | PAPLAK                   | f                        |
| IPI00419802       | 3-hydroxyisobutyryl-Coenzyme A hydrolase isoform 1        | IAPVFFR                  | d                        |
| IPI00001539       | 3-ketoacyl-CoA thiolase, mitochondrial                    | MDMLVEVNEAFAPQYLAVER     | d                        |
| IPI00001539       | 3-ketoacyl-CoA thiolase, mitochondrial                    | YALQSQQR                 | d                        |
| IPI00012828       | 3-ketoacyl-CoA thiolase, peroxisomal precursor            | IAQFLSDIPETVPLSTVNR      | d                        |
| IPI00026271       | 40S ribosomal protein S14                                 | IEDVTPIPSDSTR            | d                        |
| IPI00221091       | 40S ribosomal protein S15a                                | ILGFFF                   | d                        |
| IPI00215780       | 40S ribosomal protein S19                                 | DVNQQEIVR                | c; d                     |
| IPI00215780       | 40S ribosomal protein S19                                 | VLQALEGLK                | c                        |
| IPI00012493       | 40S ribosomal protein S20                                 | TPVEPEVAHR               | d                        |
| IPI00011253       | 40S ribosomal protein S3                                  | ELAEDGYSYGEVVR           | d                        |
| IPI00008433       | 40S ribosomal protein S5                                  | TIAECLADELINAAK          | d; e                     |
| IPI00221088       | 40S ribosomal protein S9                                  | KGQGGAGAGDDEED           | d; e                     |
| IPI00746986       | 41 kDa protein                                            | EYQLNDSAAAYLNDLDR        | d                        |
| IPI00746986       | 41 kDa protein                                            | IAQPNYIPTQQDVLK          | c; d; e                  |
| IPI00748251       | 43 kDa protein                                            | QASEQNWANYSAEQNR         | e                        |
| IPI00178056       | 44 kDa protein                                            | EVIELPLNPELFQR           | e                        |
| IPI00829867       | 44 kDa protein; GBA GBA protein                           | TYTYADTPDDFQLHNFSLPEEDTK | f                        |
| IPI00479431       | 47 kDa protein                                            | GLFEVNPWK                | d; e                     |
| IPI00471966       | 47 kDa protein                                            | VVDQAQR                  | d                        |
| IPI00009532       | 4-aminobutyrate aminotransferase, mitochondrial precursor | ALLTGLLDLQAR             | d; e                     |
| IPI00009532       | 4-aminobutyrate aminotransferase, mitochondrial precursor | ENQEEAR                  | d; e                     |
| IPI00009532       | 4-aminobutyrate aminotransferase, mitochondrial precursor | GTFCSFDTPDSSIR           | d; e                     |
| IPI00009532       | 4-aminobutyrate aminotransferase, mitochondrial precursor | IDHFSDEWPIAPFPR          | d                        |
| IPI00009532       | 4-aminobutyrate aminotransferase, mitochondrial precursor | IFNTWLGDFSK              | d                        |
| IPI00009532       | 4-aminobutyrate aminotransferase, mitochondrial precursor | LILAIR                   | d                        |
| IPI00009532       | 4-aminobutyrate aminotransferase, mitochondrial precursor | TIFMWYR                  | c; d; e                  |
| IPI00009532       | 4-aminobutyrate aminotransferase, mitochondrial precursor | TVAGHVEPIQSEGGDNHASDDFFR | d                        |
| IPI00009532       | 4-aminobutyrate aminotransferase, mitochondrial precursor | YPLEEFVK                 | d                        |
| IPI00009532       | 4-aminobutyrate aminotransferase, mitochondrial precursor | YPPQISR                  | e                        |
| IPI00479877       | 4-trimethylaminobutylaldehyde dehydrogenase               | ANDTTFGLAAGVFTR          | d                        |
| IPI00479877       | 4-trimethylaminobutylaldehyde dehydrogenase               | IWSQK                    | c                        |
| IPI00479877       | 4-trimethylaminobutylaldehyde dehydrogenase               | VEPADASGTEK              | c; d                     |
| IPI00479877       | 4-trimethylaminobutylaldehyde dehydrogenase               | VLGFVK                   | c                        |
| IPI00479877       | 4-trimethylaminobutylaldehyde dehydrogenase               | VTHIYYSQLK               | d                        |
| IPI00747497       | 50 kDa protein                                            | AFNQK                    | e                        |
| IPI00401829       | 50 kDa protein                                            | IVLSEEEKAFLOK            | a                        |
| IPI00747497       | 50 kDa protein                                            | TPEFLR                   | d                        |
| IPI00472949       | 51 kDa protein                                            | ALGPEPTTEGRR             | a                        |
| IPI00478026       | 51 kDa protein                                            | GIFLAFPDFK               | c; d                     |
| IPI00472949       | 51 kDa protein                                            | GRGMPLTNSRDASEAP         | a                        |
| IPI00472949       | 51 kDa protein                                            | GVPGAPPSR                | a                        |
| IPI00472949       | 51 kDa protein                                            | ITTFPPVIVTCDAVR          | a                        |
| IPI00472949       | 51 kDa protein                                            | TGGTQDLFTCGKCR           | a                        |
| IPI00478021       | 515 kDa protein                                           | EKENLQVTSLNHKYFR         | a                        |
| IPI00747533       | 53 kDa protein                                            | AGQAVDDFIEK              | c                        |
| IPI00747533       | 53 kDa protein                                            | EAWPHIK                  | c                        |
| IPI00745729       | 53 kDa protein                                            | EEIVLPCIVR               | c; d                     |
| IPI00747533       | 53 kDa protein                                            | FQFDGDKK                 | c                        |
| IPI00747533       | 53 kDa protein                                            | GILFVGSVGGGEEGAR         | c; d                     |
| IPI00646632       | 53 kDa protein                                            | GNLIPGINEAAVAATEEHK      | d                        |
| IPI00745729       | 53 kDa protein                                            | IYVVDVGSPEPR             | c; d                     |
| IPI00646632       | 53 kDa protein                                            | LPDGSEIPLPLLGR           | c; d; e                  |
| IPI00646632       | 53 kDa protein                                            | LYDDDFDIEEFAK            | e                        |
| IPI00747533       | 53 kDa protein                                            | TIFQGAIAK                | e                        |
| IPI00747533       | 53 kDa protein                                            | VVGAQSLK                 | c                        |
| IPI00477531       | 532 kDa protein                                           | DQQAEEK                  | a; d                     |
| IPI00477531       | 532 kDa protein                                           | DYIPVDQEELR              | d                        |
| IPI00477531       | 532 kDa protein                                           | EAELEDTGLGSGSEER         | d; e                     |
| IPI00477531       | 532 kDa protein                                           | EQPWVSVQPR               | d; e                     |
| IPI00477531       | 532 kDa protein                                           | EYQTQLIQR                | d                        |
| IPI00477531       | 532 kDa protein                                           | FNYGFYELGVQDK            | e                        |
| IPI00477531       | 532 kDa protein                                           | FQSISTEFLALMK            | d; e                     |
| IPI00477531       | 532 kDa protein                                           | GNEIVLSAGSTR             | e                        |
| IPI00477531       | 532 kDa protein                                           | GTVGEPTYDAEQHFLR         | e                        |
| IPI00477531       | 532 kDa protein                                           | ILDDDTHTTLENLK           | d                        |
| IPI00477531       | 532 kDa protein                                           | HQGLTVEQAEAVVR           | e                        |

| IPI Accession No. | Protein Description               | Peptide Sequence*              | Primary Source Dataset** |
|-------------------|-----------------------------------|--------------------------------|--------------------------|
| IPI00477531       | 532 kDa protein                   | LQGEFQLR                       | d; e                     |
| IPI00477531       | 532 kDa protein                   | NYMSNPSYNYEIVNR                | e                        |
| IPI00477531       | 532 kDa protein                   | SFEWLSQMR                      | e                        |
| IPI00477531       | 532 kDa protein                   | SIPLDEGEDEAQR                  | e                        |
| IPI00477531       | 532 kDa protein                   | SLQLALNEVK                     | e                        |
| IPI00477531       | 532 kDa protein                   | SPLVMIDLNIQGVQR                | e                        |
| IPI00477531       | 532 kDa protein                   | TYAEPLTAAMVEFYTMSQER           | d                        |
| IPI00477531       | 532 kDa protein                   | VAAPDVVPTLDTVR                 | d                        |
| IPI00477531       | 532 kDa protein                   | VQVALEELQDLK                   | e                        |
| IPI00477531       | 532 kDa protein                   | VQYPQSQACK                     | e                        |
| IPI00477531       | 533 kDa protein                   | CGMVWESEDLVLTDMIF              | a                        |
| IPI00477531       | 533 kDa protein                   | DIQMPDGIR                      | a                        |
| IPI00477531       | 533 kDa protein                   | DRHWKQLMK                      | a                        |
| IPI00477531       | 533 kDa protein                   | EKAMSRPILYSNWLK                | a                        |
| IPI00477531       | 533 kDa protein                   | ENFIPVIVNSAAEISDAIR            | a; d                     |
| IPI00477531       | 533 kDa protein                   | ESPEVLLTLDILK                  | a                        |
| IPI00477531       | 533 kDa protein                   | LFRSLAMTRKPDRLIAQV             | a                        |
| IPI00477531       | 533 kDa protein                   | LIPSLR                         | a                        |
| IPI00477531       | 533 kDa protein                   | MGAKLLQDVR                     | a                        |
| IPI00477531       | 533 kDa protein                   | MQMLEDEDDLAYAETEK              | a                        |
| IPI00477531       | 533 kDa protein                   | NEAIVK                         | a                        |
| IPI00477531       | 533 kDa protein                   | QCYER                          | a                        |
| IPI00477531       | 533 kDa protein                   | TLHTTASNWLHLIPQTLK             | a                        |
| IPI00657680       | 55 kDa protein                    | DGEEAGAYDGPR                   | e                        |
| IPI00657680       | 55 kDa protein                    | DLIIAYVDVDEK                   | d                        |
| IPI00657680       | 55 kDa protein                    | EATNPPVYQEEPK                  | c; d                     |
| IPI00657680       | 55 kDa protein                    | ELSDFISVLQR                    | d; e                     |
| IPI00657680       | 55 kDa protein                    | FLQDYFDGNLK                    | c; d                     |
| IPI00657680       | 55 kDa protein                    | FVMQEEFSR                      | d; e                     |
| IPI00657680       | 55 kDa protein                    | LAPEYEAATR                     | d; e                     |
| IPI00657680       | 55 kDa protein                    | MDATANDVSPYEVK                 | d; e                     |
| IPI00480179       | 55 kDa protein                    | NRTLDEVLTYLLLVVWQQR            | a                        |
| IPI00657680       | 55 kDa protein                    | QAGPASVPLR                     | e                        |
| IPI00657680       | 55 kDa protein                    | TVAVTEQK                       | d                        |
| IPI00480107       | 565 kDa protein                   | AKDGGSERK                      | a                        |
| IPI00480107       | 565 kDa protein                   | EFPEADAEK                      | a                        |
| IPI00480107       | 565 kDa protein                   | LAPEGLR                        | a                        |
| IPI00480107       | 565 kDa protein                   | QQVSLLAQR                      | a                        |
| IPI00480107       | 565 kDa protein                   | TPDVEK                         | a                        |
| IPI00479977       | 59 kDa protein                    | DPSVCCIQTHTLCRDTH              | a                        |
| IPI00479977       | 59 kDa protein                    | EGHYIMVK                       | a                        |
| IPI00479977       | 59 kDa protein                    | LTADLSAETLQARR                 | a                        |
| IPI00479977       | 59 kDa protein                    | QEQTISK                        | a                        |
| IPI00749237       | 6.8 kDa mitochondrial proteolipid | ASAPAGHH                       | c; d                     |
| IPI00479845       | 60 kDa protein                    | DDYVHEFCR                      | d                        |
| IPI00479273       | 60 kDa protein                    | IEIVTLREALLEETVAR              | a                        |
| IPI00479273       | 60 kDa protein                    | RRPGAALSDSR                    | a                        |
| IPI00008529       | 60S acidic ribosomal protein P2   | LASVPAGGAVVAAPGSAAPAAGSAPAAAEK | d                        |
| IPI00465361       | 60S ribosomal protein L13         | EAAEQDVEK                      | c                        |
| IPI00219160       | 60S ribosomal protein L34         | AQAQSQK                        | d                        |
| IPI00412607       | 60S ribosomal protein L35         | VELSQLR                        | c                        |
| IPI00031691       | 60S ribosomal protein L9          | CTVQQADE                       | d                        |
| IPI00334408       | 61 kDa protein                    | LDAEVVCSGHTEAR                 | a                        |
| IPI00749074       | 62 kDa protein                    | DIQSLPR                        | e                        |
| IPI00747924       | 62 kDa protein                    | IPHGVSQVQDR                    | d                        |
| IPI00749074       | 62 kDa protein                    | LFEAEQDLFR                     | e                        |
| IPI00477130       | 66 kDa protein                    | LMAKTLILYGDIESK                | a                        |
| IPI00477130       | 66 kDa protein                    | TALILAVR                       | a                        |
| IPI00029997       | 6-phosphogluconolactonase         | ELPAAVAPAGPASLAR               | c; d; e                  |
| IPI00029997       | 6-phosphogluconolactonase         | IVAPISDSPKPPPQR                | c                        |
| IPI00029997       | 6-phosphogluconolactonase         | LCWFLDEAAAR                    | d                        |
| IPI00640630       | 7 kDa protein                     | AGPESDAQYQFTGIK                | c; d; e                  |
| IPI00477351       | 70 kDa protein                    | MDLVLK                         | e                        |
| IPI00477128       | 71 kDa protein                    | EALTRLR                        | a                        |
| IPI00477128       | 71 kDa protein                    | ELLQVR                         | a                        |
| IPI00477128       | 71 kDa protein                    | GLMEERLR                       | a                        |
| IPI00399382       | 72 kDa protein                    | EELGFFQYRER                    | a                        |
| IPI00399382       | 72 kDa protein                    | ELQKLGKER                      | a                        |
| IPI00759502       | 74 kDa protein                    | GGGGPGGGPGGGAGGPPSGGGGGPGIR    | d                        |
| IPI00759502       | 74 kDa protein                    | QDDGTGPEK                      | d                        |
| IPI00413996       | 75 kDa protein                    | ASPVTLR                        | a                        |
| IPI00413996       | 75 kDa protein                    | NMLERGEGER                     | a                        |
| IPI00238755       | 75 kDa protein                    | YFEDIEVVK                      | a                        |
| IPI00477833       | 76 kDa protein                    | GYLAAIK                        | d                        |
| IPI00477833       | 76 kDa protein                    | IGTETTEGAESAQPEAELEATVPQEK     | d; e                     |
| IPI00477833       | 76 kDa protein                    | VFEFNVLDQELPSLWSR              | d                        |
| IPI00477833       | 76 kDa protein                    | YGFYVNTFK                      | d                        |
| IPI00413134       | 77 kDa protein                    | DECAEHIEGERAR                  | a                        |
| IPI00413134       | 77 kDa protein                    | MSKMLQEICTLK                   | a                        |
| IPI00478276       | 77 kDa protein                    | SLDISVVDYDIK                   | d                        |
| IPI00478276       | 77 kDa protein                    | TGGVGGYPAVGAR                  | e                        |
| IPI00478276       | 77 kDa protein                    | TKPQQPVSEPAEQAPEPK             | d; e                     |
| IPI00478276       | 77 kDa protein                    | TLNPEFNEEFFYDIK                | d; e                     |
| IPI00746224       | 8 kDa protein                     | ANFNNEK                        | d                        |
| IPI00442420       | 81 kDa protein                    | AVPLEVTK                       | e                        |
| IPI00477018       | 82 kDa protein                    | LSSVNLQEK                      | c                        |
| IPI00414205       | 85 kDa protein                    | AHNAASQAPR                     | a                        |
| IPI00414205       | 85 kDa protein                    | DSFELEK                        | a                        |
| IPI00414205       | 85 kDa protein                    | KEHGK                          | a                        |
| IPI00657751       | 87 kDa protein                    | GYNAQEYYDR                     | c; d                     |
| IPI00657751       | 87 kDa protein                    | IGEDFISDLQLR                   | d                        |
| IPI00657751       | 87 kDa protein                    | LLSFVDDEAFIR                   | d                        |
| IPI00657751       | 87 kDa protein                    | VIFLENYR                       | c; d                     |
| IPI00478540       | 89 kDa protein                    | AFEEAEK                        | c                        |
| IPI00414483       | 89 kDa protein                    | DIEIKENDELKTLK                 | a                        |
| IPI00414483       | 89 kDa protein                    | ECTLLK                         | a                        |
| IPI00478540       | 89 kDa protein                    | EVDIGIPATGR                    | c; d; e                  |

| IPI Accession No. | Protein Description                                   | Peptide Sequence*           | Primary Source Dataset** |
|-------------------|-------------------------------------------------------|-----------------------------|--------------------------|
| IPI00478540       | 89 kDa protein                                        | GGNIGDGGGAADR               | c; d; e                  |
| IPI00414483       | 89 kDa protein                                        | ISFNVR                      | a                        |
| IPI00478540       | 89 kDa protein                                        | NAPAIHIDELDAIAPK            | d                        |
| IPI00478540       | 89 kDa protein                                        | QTNPNAMEVEEDDPVPEIR         | c; d                     |
| IPI00414483       | 89 kDa protein                                        | SLEVELK                     | a                        |
| IPI00414483       | 89 kDa protein                                        | VMESILLRLNDLNDNR            | a                        |
| IPI00478540       | 89 kDa protein                                        | WALSQSNPSALR                | e                        |
| IPI00643334       | 9 kDa protein                                         | DGGEALVSPDGTVTEAPR          | d; e                     |
| IPI00515083       | 9 kDa protein                                         | NNPEPWNK                    | d; e                     |
| IPI00413658       | 90 kDa protein                                        | AIVRTYRAGPSFSK              | a                        |
| IPI00413658       | 90 kDa protein                                        | EFLADAIGR                   | a                        |
| IPI00413658       | 90 kDa protein                                        | EKRHSTHDEESGENPML           | a                        |
| IPI00413658       | 90 kDa protein                                        | SKLQMGEK                    | a                        |
| IPI00744109       | 91 kDa protein                                        | IEIFQTLVPR                  | d                        |
| IPI00472310       | 96 kDa protein                                        | ELTAATFMEVIAEDNR            | a                        |
| IPI00472310       | 96 kDa protein                                        | QVEYAVLR                    | a                        |
| IPI00479221       | 97 kDa protein                                        | APPGVFSR                    | a                        |
| IPI00470511       | AAT1-alpha                                            | AEIEKMAEK                   | a                        |
| IPI00328762       | ABC A13                                               | EAYGQGLRLTLTR               | a                        |
| IPI00328762       | ABC A13                                               | ETIVHLMK                    | a                        |
| IPI00328762       | ABC A13                                               | FMQDLFNALLRETSMK            | a                        |
| IPI00328762       | ABC A13                                               | MQTLGSHWIR                  | a                        |
| IPI00328762       | ABC A13                                               | SINSMALQK                   | a                        |
| IPI00328762       | ABC A13                                               | WGHVGGCHPK                  | a                        |
| IPI00295640       | ABC transporter ABCA6                                 | EHLEVYAAVK                  | a                        |
| IPI00295640       | ABC transporter ABCA6                                 | GLRKADAR                    | a                        |
| IPI00295640       | ABC transporter ABCA6                                 | MQVFAMARLR                  | a                        |
| IPI00293895       | ABC transporter ABCA7                                 | SLPLLGEDEDVAR               | a                        |
| IPI00293895       | ABC transporter ABCA7                                 | TVLGGASAHRTLAGLGLK          | a                        |
| IPI00293895       | ABC transporter ABCA7                                 | VYRQGRMPAVDR                | a                        |
| IPI00024167       | ABT1-associated protein                               | ADEITRR                     | d                        |
| IPI00440499       | ACAT1 protein                                         | AAWEAGK                     | c; d                     |
| IPI00062003       | ACAT1 protein                                         | EAYMGNVLQGGEGQAPTR          | c; d; e                  |
| IPI00440499       | ACAT1 protein                                         | EVVIVSATR                   | e                        |
| IPI00440499       | ACAT1 protein                                         | GSTPYGGVK                   | d; e                     |
| IPI00440499       | ACAT1 protein                                         | NEQDAYAINS YTR              | d; e                     |
| IPI00440499       | ACAT1 protein                                         | TPIGSFLGSLLLPATK            | d                        |
| IPI00011569       | Acetyl-CoA carboxylase 1                              | SSWSGLHLVK                  | a                        |
| IPI00396017       | Acetyl-Coenzyme A cArboxylase Alpha                   | SPEYPEGR                    | a                        |
| IPI00183169       | ACF7 protein                                          | LHEMLER                     | c; e                     |
| IPI00017855       | Aconitate hydratase, mitochondrial precursor          | CTTDHISAAGPWLK              | d                        |
| IPI00017855       | Aconitate hydratase, mitochondrial precursor          | DFTPGPLK                    | c; d                     |
| IPI00017855       | Aconitate hydratase, mitochondrial precursor          | DGYAQILR                    | d; e                     |
| IPI00017855       | Aconitate hydratase, mitochondrial precursor          | DINQEVYNFLATAGAK            | c; d; e                  |
| IPI00017855       | Aconitate hydratase, mitochondrial precursor          | DLGGIVLANACPGICGQWDR        | d                        |
| IPI00017855       | Aconitate hydratase, mitochondrial precursor          | DSSGQHVDPVSPTSQR            | c; d                     |
| IPI00017855       | Aconitate hydratase, mitochondrial precursor          | EDIANLADEFK                 | d                        |
| IPI00017855       | Aconitate hydratase, mitochondrial precursor          | EGWPLDIR                    | c; d                     |
| IPI00017855       | Aconitate hydratase, mitochondrial precursor          | EHAALPEPR                   | d; e                     |
| IPI00017855       | Aconitate hydratase, mitochondrial precursor          | FNPETDVLGTIDGK              | c; d; e                  |
| IPI00017855       | Aconitate hydratase, mitochondrial precursor          | FNPETDVLGTIDGKK             | d                        |
| IPI00017855       | Aconitate hydratase, mitochondrial precursor          | GEFDPGQDTYOHPPK             | c; d                     |
| IPI00017855       | Aconitate hydratase, mitochondrial precursor          | IYVGHLLDDPASQEI ER          | d; e                     |
| IPI00017855       | Aconitate hydratase, mitochondrial precursor          | LEAPDADLPK                  | d                        |
| IPI00017855       | Aconitate hydratase, mitochondrial precursor          | LQLLEPDK                    | d; e                     |
| IPI00017855       | Aconitate hydratase, mitochondrial precursor          | LTIQGLK                     | d; e                     |
| IPI00017855       | Aconitate hydratase, mitochondrial precursor          | NAVYQEFQVFPD TAR            | c; d; e                  |
| IPI00017855       | Aconitate hydratase, mitochondrial precursor          | NDANPETHAFVTSPEIVTALAIAGTLK | d; e                     |
| IPI00017855       | Aconitate hydratase, mitochondrial precursor          | NFTGR                       | d                        |
| IPI00017855       | Aconitate hydratase, mitochondrial precursor          | NINIVR                      | d; e                     |
| IPI00017855       | Aconitate hydratase, mitochondrial precursor          | NTIVTSYNR                   | d; e                     |
| IPI00017855       | Aconitate hydratase, mitochondrial precursor          | QALAHGLK                    | d                        |
| IPI00017855       | Aconitate hydratase, mitochondrial precursor          | SQFTITPGSEQIR               | d                        |
| IPI00017855       | Aconitate hydratase, mitochondrial precursor          | VAMQDATQAMMLQFSSGLSK        | d; e                     |
| IPI00017855       | Aconitate hydratase, mitochondrial precursor          | VGLIGSCTNSYEDMGR            | c; e                     |
| IPI00017855       | Aconitate hydratase, mitochondrial precursor          | WVVIGDENYEGGSSR             | d                        |
| IPI00455786       | Actin binding LIM protein 1                           | TLSPTPSAEGYQDVR             | e                        |
| IPI00032958       | Actin binding protein anillin                         | DLWMQK                      | a                        |
| IPI00032958       | Actin binding protein anillin                         | ETLVSQCR                    | a                        |
| IPI00032958       | Actin binding protein anillin                         | FGERCQEHSK                  | a                        |
| IPI00032958       | Actin binding protein anillin                         | GLNSRLEATAASSVKTR           | a                        |
| IPI00032958       | Actin binding protein anillin                         | TRMQKLAEQR                  | a                        |
| IPI00607772       | actin related protein 2/3 complex subunit 4 isoform b | AENFFILR                    | c; d                     |
| IPI00607772       | actin related protein 2/3 complex subunit 4 isoform b | IVAEFLK                     | d                        |
| IPI00023006       | Actin, alpha cardiac                                  | YPIEHGHTNWDDMEK             | c; d; e                  |
| IPI00021440       | Actin, cytoplasmic 2                                  | AGFAGDDAPR                  | c; d                     |
| IPI00021440       | Actin, cytoplasmic 2                                  | AVFPSIVGRPR                 | a; c; d                  |
| IPI00021440       | Actin, cytoplasmic 2                                  | CDVDIR                      | d; e                     |
| IPI00021440       | Actin, cytoplasmic 2                                  | DIKEK                       | e                        |
| IPI00021440       | Actin, cytoplasmic 2                                  | DLTDYLMK                    | d; e; f; g               |
| IPI00021440       | Actin, cytoplasmic 2                                  | DLYANTVLSGGTMYPGIADR        | c; d; e                  |
| IPI00021440       | Actin, cytoplasmic 2                                  | DSYVGDEAQS K                | c; e                     |
| IPI00021440       | Actin, cytoplasmic 2                                  | EITALAPSTMK                 | c; d; e; g               |
| IPI00021440       | Actin, cytoplasmic 2                                  | GILT LK                     | c; d                     |
| IPI00021440       | Actin, cytoplasmic 2                                  | HQGVVMVGMGQK                | c; d; e                  |
| IPI00021440       | Actin, cytoplasmic 2                                  | IAPPER                      | c; d; e                  |
| IPI00021440       | Actin, cytoplasmic 2                                  | ILTER                       | e                        |
| IPI00021440       | Actin, cytoplasmic 2                                  | KDLYANTVLSGGTMYPGIADR       | c; d; e                  |
| IPI00021440       | Actin, cytoplasmic 2                                  | LCYVALDFFQEMATAASSSLEK      | d                        |
| IPI00021440       | Actin, cytoplasmic 2                                  | LDLAGR                      | c; d; e                  |
| IPI00021440       | Actin, cytoplasmic 2                                  | QEYDESGPSIVHR               | c; d; e                  |
| IPI00021440       | Actin, cytoplasmic 2                                  | SYELPDGQVITIGNER            | c; d; e; f; g            |
| IPI00021440       | Actin, cytoplasmic 2                                  | VAPPEHPVLLTEAPLNPK          | c; d; e; f               |
| IPI00759776       | Actinin alpha 1 isoform b                             | EGLLLWCQR                   | d; e                     |
| IPI00759776       | Actinin alpha 1 isoform b                             | FAIQDISVEETS AK             | e                        |
| IPI00759776       | Actinin alpha 1 isoform b                             | ICDQVNDLGAITQK              | e                        |
| IPI00759776       | Actinin alpha 1 isoform b                             | LLETIDQLYLEV AK             | e                        |

| IPi Accession No. | Protein Description                                             | Peptide Sequence*   | Primary Source Dataset** |
|-------------------|-----------------------------------------------------------------|---------------------|--------------------------|
| IPi0075976        | Actinin alpha 1 isoform b                                       | TINEVENQLTR         | e                        |
| IPi00005159       | Actin-like protein 2                                            | QEYQEK              | d; e                     |
| IPi00470573       | actin-related protein 2 isoform a                               | GYAFNHSADFETVR      | c; d                     |
| IPi00470573       | actin-related protein 2 isoform a                               | LALETIVLVESYTLDPGR  | d                        |
| IPi00005161       | Actin-related protein 2/3 complex subunit 2                     | DTDAAVGDNIGYTFVLFPR | d                        |
| IPi00005161       | Actin-related protein 2/3 complex subunit 2                     | HEETLALK            | e                        |
| IPi00005161       | Actin-related protein 2/3 complex subunit 2                     | VFMQEFK             | d                        |
| IPi00005162       | Actin-related protein 2/3 complex subunit 3                     | WWTCTFK             | d                        |
| IPi00554811       | Actin-related protein 2/3 complex subunit 4                     | ELLLOPVTISR         | c; d                     |
| IPi00030706       | Activator of 90 kDa heat shock protein ATPase homolog 1         | ETFLTSPEELYR        | e                        |
| IPi00030706       | Activator of 90 kDa heat shock protein ATPase homolog 1         | GIPAPEEER           | d; e                     |
| IPi00022442       | Acyl carrier protein, mitochondrial precursor                   | LMCPQEIVDYIADK      | d; e                     |
| IPi00022442       | Acyl carrier protein, mitochondrial precursor                   | LMCPQEIVDYIADKK     | d                        |
| IPi00022442       | Acyl carrier protein, mitochondrial precursor                   | VLYVLK              | d                        |
| IPi00337741       | Acylamino-acid-releasing enzyme                                 | AGGTGPGEEK          | d                        |
| IPi00747159       | Acyl-CoA dehydrogenase family member 8, mitochondrial precursor | DYAVQQIVR           | d                        |
| IPi00396601       | Acyl-Coenzyme A binding domain                                  | GSLNEQIALVLMR       | a                        |
| IPi00396601       | Acyl-Coenzyme A binding domain                                  | NNSGAPIHEK          | a                        |
| IPi00396601       | Acyl-Coenzyme A binding domain                                  | VIGPFYIVEDKK        | a                        |
| IPi00556276       | Acyl-Coenzyme A dehydrogenase family, member 8 variant          | AVIEDCAVPVANR       | e                        |
| IPi00333838       | Acyl-coenzyme A thioesterase 1                                  | GLAPEQPVTLR         | d; e                     |
| IPi00646015       | acyl-Coenzyme A thioesterase 2, mitochondrial isoform a         | DSYIEVLLPLGSEPELR   | d                        |
| IPi00646015       | acyl-Coenzyme A thioesterase 2, mitochondrial isoform a         | GPAFVNPILPESPEEELFR | e                        |
| IPi00216461       | Acylphosphatase, muscle type isozyme                            | IGVVGWVK            | d                        |
| IPi00216461       | Acylphosphatase, muscle type isozyme                            | LEYSNFSIR           | c; d; e                  |
| IPi00216461       | Acylphosphatase, muscle type isozyme                            | SDYEVFGR            | c; d                     |
| IPi00216461       | Acylphosphatase, muscle type isozyme                            | SWLSK               | c                        |
| IPi00216461       | Acylphosphatase, muscle type isozyme                            | TNFSNEK             | c; d                     |
| IPi00015351       | AD039                                                           | EPPPEQR             | c; d                     |
| IPi00036578       | ADAMTS-12 precursor                                             | ERWVETLVVADTK       | a                        |
| IPi00036578       | ADAMTS-12 precursor                                             | LCNNPEPKFGKYCTGGE   | a                        |
| IPi00036578       | ADAMTS-12 precursor                                             | LSASFQTLKAMKK       | a                        |
| IPi00036578       | ADAMTS-12 precursor                                             | YRLCNVHPCR          | a                        |
| IPi00411930       | ADAMTS-18 precursor                                             | SFNRPER             | a                        |
| IPi00411930       | ADAMTS-18 precursor                                             | TCCRGVR             | a                        |
| IPi00411930       | ADAMTS-18 precursor                                             | VGHRCEK             | a                        |
| IPi00009143       | ADAMTS-5 precursor                                              | GPWAEEEK            | a                        |
| IPi00009143       | ADAMTS-5 precursor                                              | LLGWASLLLCAFR       | a                        |
| IPi00005793       | Adapter-related protein complex 3 beta 2                        | GSESESEEDGKR        | a                        |
| IPi00014624       | Adapter-related protein complex 3 sigma 1 subunit               | FYQPYSEDTOQIIR      | e                        |
| IPi00024006       | Adaptor protein                                                 | EPVSRSFVVALRSK      | a                        |
| IPi00024006       | Adaptor protein                                                 | ITPYLLHFSNDSVPR     | a                        |
| IPi00619900       | adaptor-related protein complex 2, mu 1 subunit isoform b       | ASENAIVWK           | d                        |
| IPi00619900       | adaptor-related protein complex 2, mu 1 subunit isoform b       | DHLPFR              | d                        |
| IPi00619900       | adaptor-related protein complex 2, mu 1 subunit isoform b       | GTADETSK            | c                        |
| IPi00619900       | adaptor-related protein complex 2, mu 1 subunit isoform b       | SISFIPDGEFELMR      | d; e                     |
| IPi00619900       | adaptor-related protein complex 2, mu 1 subunit isoform b       | SNIWLAATIK          | d                        |
| IPi00619900       | adaptor-related protein complex 2, mu 1 subunit isoform b       | TFTTQQGIK           | d; e                     |
| IPi00619900       | adaptor-related protein complex 2, mu 1 subunit isoform b       | TSFFHVK             | d                        |
| IPi00619900       | adaptor-related protein complex 2, mu 1 subunit isoform b       | VIPLVR              | d                        |
| IPi00253279       | ADD1 protein                                                    | EQNLQDIK            | e                        |
| IPi00479201       | Adenosylhomocysteinase                                          | EIIIAEQDMSALISLR    | d                        |
| IPi00028513       | Adenylate cyclase type III                                      | CDYLEEK             | a                        |
| IPi00028513       | Adenylate cyclase type III                                      | GPIFYK              | a                        |
| IPi00030099       | Adenylate cyclase, type IX                                      | AEERGR              | a                        |
| IPi00030099       | Adenylate cyclase, type IX                                      | DLEVEK              | a                        |
| IPi00030099       | Adenylate cyclase, type IX                                      | ERMHHSVMPRIHADLMK   | a                        |
| IPi00030099       | Adenylate cyclase, type IX                                      | VGGGRLRR            | a                        |
| IPi00030099       | Adenylate cyclase, type IX                                      | VGQSIMHGKDLVEKALK   | a                        |
| IPi00515036       | Adenylate kinase 1                                              | EVQQGEEFER          | c; d                     |
| IPi00515036       | Adenylate kinase 1                                              | GGLIDGYPR           | c; d                     |
| IPi00640817       | Adenylate kinase 1                                              | GQLVPLETVLDMLR      | d                        |
| IPi00640817       | Adenylate kinase 1                                              | SEVSSGSAR           | c                        |
| IPi00640817       | Adenylate kinase 1                                              | YDDNEETIK           | c                        |
| IPi00515036       | Adenylate kinase 1                                              | VNTSK               | d                        |
| IPi00640817       | Adenylate kinase 1                                              | YGYTHLSTGDLR        | e                        |
| IPi00334313       | Adenylate kinase 5, isoform 1                                   | LMQIPDEEGVIDGFPR    | e                        |
| IPi00293307       | Adipophilin                                                     | GAVTGSVEK           | c                        |
| IPi00012347       | Adlican                                                         | IKSMEPSDGLYQCIAQV   | a                        |
| IPi00012347       | Adlican                                                         | QLEMEK              | a                        |
| IPi00012347       | Adlican                                                         | RPNGRR              | a                        |
| IPi00012347       | Adlican                                                         | RPNKIR              | a                        |
| IPi00012347       | Adlican                                                         | SILKAGVQAR          | a                        |
| IPi00012347       | Adlican                                                         | SSLSTQDILLIKK       | a                        |
| IPi00012347       | Adlican                                                         | SVTDK               | a                        |
| IPi00012347       | Adlican                                                         | VIPGSYNR            | a                        |
| IPi00012347       | Adlican                                                         | VQVQDRGQYMCTASNL    | a                        |
| IPi00022891       | ADP/ATP translocase 1                                           | AAVFGVYDTAK         | d                        |
| IPi00022891       | ADP/ATP translocase 1                                           | DFLAGGVAAAASK       | d; e                     |
| IPi00022891       | ADP/ATP translocase 1                                           | EQGLFSFWR           | c; d; e                  |
| IPi00022891       | ADP/ATP translocase 1                                           | GADIMYTGTVDCVWR     | e                        |
| IPi00022891       | ADP/ATP translocase 1                                           | GAWSNVLK            | d                        |
| IPi00022891       | ADP/ATP translocase 1                                           | GNLANVIR            | d; e                     |
| IPi00022891       | ADP/ATP translocase 1                                           | LAADVKG             | c                        |
| IPi00022891       | ADP/ATP translocase 1                                           | QISAER              | d; e                     |
| IPi00022891       | ADP/ATP translocase 1                                           | QLFLGGVDR           | c; d                     |
| IPi00022891       | ADP/ATP translocase 1                                           | YFPTQALNFAFK        | c; d                     |
| IPi00007188       | ADP/ATP translocase 2                                           | DFLAGGVAAAISK       | d                        |
| IPi00291467       | ADP/ATP translocase 3                                           | DFLAGGVAAAISK       | d                        |
| IPi00291467       | ADP/ATP translocase 3                                           | EQGVLSFWR           | c; d; e; f               |
| IPi00291467       | ADP/ATP translocase 3                                           | LLLQVQHASK          | d                        |
| IPi00291467       | ADP/ATP translocase 3                                           | MMMQSGR             | d; e                     |
| IPi00291467       | ADP/ATP translocase 3                                           | QIFLGVDK            | d                        |
| IPi00291467       | ADP/ATP translocase 3                                           | TAVAPIER            | c; d; e                  |
| IPi00215917       | ADP-ribosylation factor 3                                       | DAVLLVFANK          | d                        |
| IPi00215917       | ADP-ribosylation factor 3                                       | EELMR               | c; d                     |
| IPi00215917       | ADP-ribosylation factor 3                                       | HYFQNTQGLIFVDSNDR   | d                        |



| IPI Accession No. | Protein Description                                        | Peptide Sequence*   | Primary Source Dataset** |
|-------------------|------------------------------------------------------------|---------------------|--------------------------|
| IPI00215917       | ADP-ribosylation factor 3                                  | MLAEDELK            | d                        |
| IPI00215917       | ADP-ribosylation factor 3                                  | NISFTYVDVGGQDK      | ci; d; e                 |
| IPI00215917       | ADP-ribosylation factor 3                                  | QDLPNAMNAAEITDK     | d                        |
| IPI00215918       | ADP-ribosylation factor 4                                  | DAVLLLFANK          | e                        |
| IPI00002606       | Adseverin                                                  | LYMVSADAGSMR        | a                        |
| IPI00002606       | Adseverin                                                  | YVYTEK              | a                        |
| IPI00220694       | AF15q14                                                    | EMMLQNLMTTSEDGK     | a                        |
| IPI00220694       | AF15q14                                                    | FHSAAMDEK           | a                        |
| IPI00220694       | AF15q14                                                    | SVGGPK              | a                        |
| IPI00220068       | AF-4 protein                                               | DPPPK               | a                        |
| IPI00220068       | AF-4 protein                                               | DTPPPQSLMVKITLDLLS  | a                        |
| IPI00004344       | AF5q31 protein                                             | SSSPGKPVAVSLNSH     | a                        |
| IPI00305978       | Aflatoxin B1 aldehyde reductase member 2                   | ALQAAYGASAPSVTSAALR | e                        |
| IPI00305978       | Aflatoxin B1 aldehyde reductase member 2                   | ANPWDGK             | d                        |
| IPI00305978       | Aflatoxin B1 aldehyde reductase member 2                   | QVETELFPCLR         | ci; e                    |
| IPI00479925       | Aggrin                                                     | ALEPQGLLYNGNAR      | a                        |
| IPI00479925       | Aggrin                                                     | ALQSNHFELSLRTEATQG  | a                        |
| IPI00479925       | Aggrin                                                     | DFLALALLDGR         | a                        |
| IPI00479925       | Aggrin                                                     | FGALCEAETGR         | a                        |
| IPI00479925       | Aggrin                                                     | GDFVSLALR           | a                        |
| IPI00479925       | Aggrin                                                     | KGALRVGDGPR         | a                        |
| IPI00479925       | Aggrin                                                     | NELMLNSSLMRITLR     | a                        |
| IPI00479925       | Aggrin                                                     | SIESTLDDLFR         | a                        |
| IPI00479925       | Aggrin                                                     | TEATQGLVLWVGKATER   | a                        |
| IPI00217683       | A-kinase anchor protein 12 isoform 2                       | SAEQPEQK            | ci; d                    |
| IPI00217683       | A-kinase anchor protein 12 isoform 2                       | SVPEDDGHALLAER      | c                        |
| IPI00217683       | A-kinase anchor protein 12 isoform 2                       | TEGTQEAQYADEK       | ci; d; e                 |
| IPI00157860       | A-kinase anchor protein 4 isoform 1                        | AGSHDPK             | c                        |
| IPI00027442       | Alanyl-tRNA synthetase                                     | AQTAPNK             | d                        |
| IPI00027442       | Alanyl-tRNA synthetase                                     | DVSAQATGK           | e                        |
| IPI00027442       | Alanyl-tRNA synthetase                                     | FIDFFK              | d                        |
| IPI00027442       | Alanyl-tRNA synthetase                                     | GGVYLHIGTYGDLK      | a                        |
| IPI00027442       | Alanyl-tRNA synthetase                                     | GLVVDMDGFEER        | e                        |
| IPI00027442       | Alanyl-tRNA synthetase                                     | QIWQNLGLDDTKLPGNM   | a                        |
| IPI00027442       | Alanyl-tRNA synthetase                                     | VGAEDAAGIDMAYRVLA   | a                        |
| IPI00022434       | ALB protein                                                | AVMDDFAAFVEK        | ci; d; e; f; g           |
| IPI00022434       | ALB protein                                                | DDNPNLPR            | a; d                     |
| IPI00022434       | ALB protein                                                | KQTALVELVK          | d                        |
| IPI00216773       | ALB protein                                                | VEDEKPLVEEPQNLK     | a; d; g                  |
| IPI00007257       | Alcadein alpha-1                                           | FAGEICGFK           | a                        |
| IPI00218446       | Alcohol dehydrogenase class 3 chi chain                    | GTAFGGWK            | d                        |
| IPI00647328       | Aldehyde dehydrogenase 4 family, member A1                 | SAFEYGGQK           | d                        |
| IPI00647328       | Aldehyde dehydrogenase 4 family, member A1                 | VANEPVLAFTQGSPEK    | ci; d; e                 |
| IPI00336008       | aldehyde dehydrogenase 5A1 precursor, isoform 1            | EVSAK               | c                        |
| IPI00336008       | aldehyde dehydrogenase 5A1 precursor, isoform 1            | GHDFAVK             | d                        |
| IPI00336008       | aldehyde dehydrogenase 5A1 precursor, isoform 1            | LAGLSAALLR          | d                        |
| IPI00336008       | aldehyde dehydrogenase 5A1 precursor, isoform 1            | TDSFVGGK            | e                        |
| IPI00336008       | aldehyde dehydrogenase 5A1 precursor, isoform 1            | YVCYGGK             | d; e                     |
| IPI00006663       | Aldehyde dehydrogenase, mitochondrial precursor            | EEIFGPVMQILK        | ci; d; e                 |
| IPI00006663       | Aldehyde dehydrogenase, mitochondrial precursor            | ELGEYGLQAYTEVK      | d                        |
| IPI00006663       | Aldehyde dehydrogenase, mitochondrial precursor            | ILGYINTGK           | d                        |
| IPI00006663       | Aldehyde dehydrogenase, mitochondrial precursor            | LADLIER             | d                        |
| IPI00006663       | Aldehyde dehydrogenase, mitochondrial precursor            | MDASHR              | c                        |
| IPI00006663       | Aldehyde dehydrogenase, mitochondrial precursor            | TEQGPQVDETQFK       | ci; d; e                 |
| IPI00006663       | Aldehyde dehydrogenase, mitochondrial precursor            | TFVQEDYDEFVER       | ci; d; e                 |
| IPI00006663       | Aldehyde dehydrogenase, mitochondrial precursor            | TIPIDGDFSYTR        | d; e                     |
| IPI00006663       | Aldehyde dehydrogenase, mitochondrial precursor            | VAFGTGTEIGR         | d                        |
| IPI00006663       | Aldehyde dehydrogenase, mitochondrial precursor            | YIQVAAGSSNLK        | d                        |
| IPI00006663       | Aldehyde dehydrogenase, mitochondrial precursor            | YVGNPFDK            | d                        |
| IPI00006663       | Aldehyde dehydrogenase, mitochondrial precursor            | YYAGWADK            | ci; d                    |
| IPI00642489       | aldehyde oxidase 1                                         | GLAMVPLK            | d                        |
| IPI00647702       | Aldo-keto reductase family 1, member A1                    | LWNTK               | d                        |
| IPI00556258       | Aldo-keto reductase family 1, member B1 variant (Fragment) | SPFGQVTEAVK         | c                        |
| IPI00413641       | Aldose reductase                                           | IAENFK              | c                        |
| IPI00413641       | Aldose reductase                                           | MPILGLGTWK          | d                        |
| IPI00413641       | Aldose reductase                                           | SVTPER              | e                        |
| IPI00218052       | ALFY                                                       | DSSDVSQTLDDFR       | a                        |
| IPI00218052       | ALFY                                                       | FSLTERR             | a                        |
| IPI00218052       | ALFY                                                       | KSAGEVLMTISR        | a                        |
| IPI00218052       | ALFY                                                       | LTMHTAFDR           | a                        |
| IPI00218052       | ALFY                                                       | SVTQRWER            | a                        |
| IPI00218052       | ALFY                                                       | YAALLKDPTQALNEQGD   | a                        |
| IPI00016823       | allograft inflammatory factor 1 isoform 1                  | MMLGK               | c                        |
| IPI00178743       | ALMS1 protein                                              | CNFPALARFR          | a                        |
| IPI00178743       | ALMS1 protein                                              | EPLREQNCQGQHLDR     | a                        |
| IPI00178743       | ALMS1 protein                                              | GYLAGPGR            | a                        |
| IPI00178743       | ALMS1 protein                                              | MLFTGYPEDR          | a                        |
| IPI00178743       | ALMS1 protein                                              | NKPSIK              | a                        |
| IPI00186460       | Alpha 1 type II collagen isoform 2,                        | DGCTK               | a                        |
| IPI00186460       | Alpha 1 type II collagen isoform 2,                        | GEAGAQQGPMGSPGAG    | a                        |
| IPI00186460       | Alpha 1 type II collagen isoform 2,                        | GRTGPAAGAAR         | a                        |
| IPI00186460       | Alpha 1 type II collagen isoform 2,                        | QHDAEVDATLK         | a                        |
| IPI00186460       | Alpha 1 type II collagen isoform 2,                        | TVIEYR              | a                        |
| IPI00479942       | Alpha 2,6-sialyltransferase                                | EFFSSQVGR           | a                        |
| IPI00479942       | Alpha 2,6-sialyltransferase                                | FNSAPTR             | a                        |
| IPI00479942       | Alpha 2,6-sialyltransferase                                | LLPVQGK             | a                        |
| IPI00332623       | Alpha 3 type IV collagen isoform 2,                        | SLSGVHEEK           | a                        |
| IPI00072917       | Alpha 3 type VI collagen isoform 3                         | GGIGNRGPR           | a                        |
| IPI00072917       | Alpha 3 type VI collagen isoform 3                         | GLPSSGEGKNPGR       | a                        |
| IPI00072917       | Alpha 3 type VI collagen isoform 3                         | NLKFVGHK            | a                        |
| IPI00072917       | Alpha 3 type VI collagen isoform 3                         | NMRSQHPVYVLTEDTLK   | a                        |
| IPI00072917       | Alpha 3 type VI collagen isoform 3                         | VEFLNAHSSK          | a                        |
| IPI00072917       | Alpha 3 type VI collagen isoform 3                         | WYYDPNTK            | a                        |
| IPI00021369       | Alpha crystallin B chain                                   | APSWEDTGLSEMR       | ci; d; e                 |
| IPI00021369       | Alpha crystallin B chain                                   | EKKPAVTAAPK         | d; e                     |
| IPI00021369       | Alpha crystallin B chain                                   | FSVNLVVK            | d                        |
| IPI00021369       | Alpha crystallin B chain                                   | HFSPEELK            | e                        |

| IPI Accession No. | Protein Description                                          | Peptide Sequence*        | Primary Source Dataset** |
|-------------------|--------------------------------------------------------------|--------------------------|--------------------------|
| IPI00021369       | Alpha crystallin B chain                                     | KQVSGPER                 | c                        |
| IPI00021369       | Alpha crystallin B chain                                     | QVSGPER                  | cg; d; e                 |
| IPI00021369       | Alpha crystallin B chain                                     | TIPTR                    | e                        |
| IPI00021369       | Alpha crystallin B chain                                     | VLGDVIEVHGK              | cg; d                    |
| IPI00419307       | alpha isoform of regulatory subunit A, protein phosphatase 2 | AVGPEITK                 | d                        |
| IPI00419307       | alpha isoform of regulatory subunit A, protein phosphatase 2 | SEIHPMFSNLASDEQDSVR      | d; e                     |
| IPI00419307       | alpha isoform of regulatory subunit A, protein phosphatase 2 | VLAMSGDPNYLHR            | c                        |
| IPI00419307       | alpha isoform of regulatory subunit A, protein phosphatase 2 | YFAQEALTVLSLA            | e                        |
| IPI00215948       | Alpha-1 catenin                                              | DQMAAARGILQK             | a                        |
| IPI00061448       | Alpha-1.3                                                    | FTARGGR                  | a                        |
| IPI00061448       | Alpha-1.3                                                    | TIAVLLDDILQR             | a                        |
| IPI00022429       | Alpha-1-acid glycoprotein 1 precursor                        | EYQTR                    | cg; d                    |
| IPI00553177       | Alpha-1-antitrypsin precursor                                | AVLTIDEK                 | c                        |
| IPI00553177       | Alpha-1-antitrypsin precursor                                | DTEEDFHVDQVITVK          | d                        |
| IPI00553177       | Alpha-1-antitrypsin precursor                                | FLENDERR                 | cg; d                    |
| IPI00553177       | Alpha-1-antitrypsin precursor                                | LGMFNIQHCK               | d                        |
| IPI00553177       | Alpha-1-antitrypsin precursor                                | LSSWVLLMK                | d                        |
| IPI00553177       | Alpha-1-antitrypsin precursor                                | VVNPTQK                  | c                        |
| IPI00164528       | Alpha-1-syntrophin                                           | NSTGGTISVGVWSPASPLQR     | e                        |
| IPI00473136       | Alpha2(E)-catenin                                            | EHANK                    | a                        |
| IPI00473136       | Alpha2(E)-catenin                                            | ERSDALNSAIDKMTK          | a                        |
| IPI00473136       | Alpha2(E)-catenin                                            | ESQFLK                   | a                        |
| IPI00473136       | Alpha2(E)-catenin                                            | IAEAGSRMDK               | a                        |
| IPI00473136       | Alpha2(E)-catenin                                            | LVVDGIR                  | a                        |
| IPI00029863       | Alpha-2-antiplasmin precursor                                | LGNEPFGGQTALK            | a                        |
| IPI00022431       | Alpha-2-HS-glycoprotein precursor                            | FSVYYAK                  | a                        |
| IPI00019884       | Alpha-actinin-2                                              | ETADTDTAEQVIASFR         | e                        |
| IPI00019884       | Alpha-actinin-2                                              | GITQEQMNEFR              | e                        |
| IPI00019884       | Alpha-actinin-2                                              | TINEVETQLTR              | e                        |
| IPI00013808       | Alpha-actinin-4                                              | AETAANR                  | d                        |
| IPI00013808       | Alpha-actinin-4                                              | DGLAFNALIHR              | d                        |
| IPI00013808       | Alpha-actinin-4                                              | DLLLDPAWEK               | d                        |
| IPI00013808       | Alpha-actinin-4                                              | ELPPDQAEYCIAR            | c                        |
| IPI00013808       | Alpha-actinin-4                                              | GISQEQMNEFR              | d                        |
| IPI00013808       | Alpha-actinin-4                                              | GYEEWLNNEIR              | d; e                     |
| IPI00013808       | Alpha-actinin-4                                              | LASDLEWIR                | d; e                     |
| IPI00013808       | Alpha-actinin-4                                              | TIQEQMQK                 | d                        |
| IPI00013808       | Alpha-actinin-4                                              | VGWEQLLTIAR              | cg; d                    |
| IPI00029468       | Alpha-centractin                                             | AGFAGDQIFK               | d                        |
| IPI00029468       | Alpha-centractin                                             | AQYYLPDGTIEIGPSR         | cg; d; e                 |
| IPI00029468       | Alpha-centractin                                             | DQLQTFSEHPVLLTEAPLNPR    | d                        |
| IPI00029468       | Alpha-centractin                                             | EYEDGAR                  | e                        |
| IPI00029468       | Alpha-centractin                                             | ISAPQER                  | cg; e                    |
| IPI00029468       | Alpha-centractin                                             | IWQYVYSK                 | d                        |
| IPI00001453       | Alpha-internexin                                             | ALEAELAALR               | d; e                     |
| IPI00001453       | Alpha-internexin                                             | AQLEEASSAR               | e                        |
| IPI00001453       | Alpha-internexin                                             | AQYESLAAK                | e                        |
| IPI00001453       | Alpha-internexin                                             | FANLNEQAAR               | d                        |
| IPI00001453       | Alpha-internexin                                             | FAVIEK                   | d                        |
| IPI00001453       | Alpha-internexin                                             | FSTSGLSISGLNPLPNPSYLLPPR | d                        |
| IPI00001453       | Alpha-internexin                                             | HSAEVAGYQDSIGLENDLR      | e                        |
| IPI00001453       | Alpha-internexin                                             | KEEEEEASK                | c                        |
| IPI00001453       | Alpha-internexin                                             | KVESLLDELAFFVR           | d                        |
| IPI00001453       | Alpha-internexin                                             | LSGAGGAGGFR              | e                        |
| IPI00001453       | Alpha-internexin                                             | NLQSAEEWYK               | d; e                     |
| IPI00001453       | Alpha-internexin                                             | QILEEER                  | e                        |
| IPI00001453       | Alpha-internexin                                             | SNIEETISSQK              | c                        |
| IPI00001453       | Alpha-internexin                                             | TIEIEGLR                 | cg; d; e                 |
| IPI00003802       | Alpha-mannosidase II                                         | SKLFR                    | a                        |
| IPI00003802       | Alpha-mannosidase II                                         | VEDSGIFTIK               | a                        |
| IPI00003802       | Alpha-mannosidase II                                         | WWDHDIQK                 | a                        |
| IPI00001712       | AlphaT-catenin                                               | DQDADNLDLR               | a                        |
| IPI00007619       | Alt. ankyrin                                                 | GQARTHSPTVSVQYTER        | a                        |
| IPI00383859       | Alu subfamily J sequence contamination                       | EVEAAVSRDRATLQPG         | a                        |
| IPI00383859       | Alu subfamily J sequence contamination                       | RIAXAR                   | a                        |
| IPI00383859       | Alu subfamily J sequence contamination                       | TPGLKXSSR                | a                        |
| IPI00383859       | Alu subfamily J sequence contamination                       | XSSRLGLPK                | a                        |
| IPI00383860       | Alu subfamily SB sequence contamination                      | LECSGSAISHCKLRPLGS       | a                        |
| IPI00383860       | Alu subfamily SB sequence contamination                      | RGFTVLARMVSISXPR         | a                        |
| IPI00023537       | Alu subfamily SB1 sequence                                   | DGVSPFXPGWSR             | a                        |
| IPI00023537       | Alu subfamily SB1 sequence                                   | DHPGXNGETPSLLK           | a                        |
| IPI00023537       | Alu subfamily SB1 sequence                                   | ISRAXWR                  | a                        |
| IPI00023537       | Alu subfamily SB1 sequence                                   | ITRSGDRDHPGXNGETP        | a                        |
| IPI00023537       | Alu subfamily SB1 sequence                                   | SGGRLXSQLLGR             | a                        |
| IPI00023537       | Alu subfamily SB1 sequence                                   | SLQXAEIPPLHSSLGDRA       | a                        |
| IPI00023537       | Alu subfamily SB1 sequence                                   | XNPVSTKNTKISR            | a                        |
| IPI00383862       | Alu subfamily SB2 sequence                                   | DGVSPXPGWSR              | a                        |
| IPI00383862       | Alu subfamily SB2 sequence                                   | LXSQHFGFRPRVDHEVR        | a                        |
| IPI00383862       | Alu subfamily SB2 sequence                                   | RPPPRANFLYFXXR           | a                        |
| IPI00383862       | Alu subfamily SB2 sequence                                   | VKPRLYXK                 | a                        |
| IPI00023539       | Alu subfamily SC sequence                                    | GFTMLARMVSISXPR          | a                        |
| IPI00023539       | Alu subfamily SC sequence                                    | MVSISXPR                 | a                        |
| IPI00383863       | Alu subfamily SP sequence contamination                      | EFETSLTMEKPR             | a                        |
| IPI00383863       | Alu subfamily SP sequence contamination                      | GGACLXSQLLGR             | a                        |
| IPI00383863       | Alu subfamily SP sequence contamination                      | GGRITXGR                 | a                        |
| IPI00383863       | Alu subfamily SP sequence contamination                      | ITXGREFETSLTMEKPR        | a                        |
| IPI00383863       | Alu subfamily SP sequence contamination                      | LGLPK                    | a                        |
| IPI00383863       | Alu subfamily SP sequence contamination                      | LNPGGGGCGEPR             | a                        |
| IPI00383863       | Alu subfamily SP sequence contamination                      | MPVIPATR                 | a                        |
| IPI00383863       | Alu subfamily SP sequence contamination                      | QENRLNPGGGGCGEPR         | a                        |
| IPI00383863       | Alu subfamily SP sequence contamination                      | BGFMSLVR                 | a                        |
| IPI00383863       | Alu subfamily SP sequence contamination                      | TPDLRXSAR                | a                        |
| IPI00383863       | Alu subfamily SP sequence contamination                      | XAEIAPLHSSLGNK           | a                        |
| IPI00383863       | Alu subfamily SP sequence contamination                      | XAEIAPLHSSLGNKSETP       | a                        |
| IPI00023543       | Alu subfamily SQ sequence                                    | GGGRLXSQLLGR             | a                        |
| IPI00023543       | Alu subfamily SQ sequence                                    | TPDLRXSTR                | a                        |
| IPI00023543       | Alu subfamily SQ sequence                                    | TPDLRXSTRILGLPK          | a                        |

| IPI Accession No. | Protein Description                                    | Peptide Sequence*         | Primary Source Dataset** |
|-------------------|--------------------------------------------------------|---------------------------|--------------------------|
| IPI00383864       | Alu subfamily SX sequence contamination                | EAEVAVSRDR                | a                        |
| IPI00383864       | Alu subfamily SX sequence contamination                | GGSRLLXSHFGR              | a                        |
| IPI00383864       | Alu subfamily SX sequence contamination                | GGSRLLXSHFGRK             | a                        |
| IPI00383864       | Alu subfamily SX sequence contamination                | LPGSSDPASASR              | a                        |
| IPI00383864       | Alu subfamily SX sequence contamination                | LQXAEIAPLHSSLGDRAR        | a                        |
| IPI00383864       | Alu subfamily SX sequence contamination                | LRQENRLNPGGGGSEPF         | a                        |
| IPI00383864       | Alu subfamily SX sequence contamination                | LXSQHFGR                  | a                        |
| IPI00383864       | Alu subfamily SX sequence contamination                | NXPGVVAR                  | a                        |
| IPI00022426       | AMBP protein precursor                                 | AFIQLWAFDAVK              | a                        |
| IPI00022426       | AMBP protein precursor                                 | ETLLQDFR                  | a                        |
| IPI00022426       | AMBP protein precursor                                 | EYCGVPGDGDDELLR           | a                        |
| IPI00022426       | AMBP protein precursor                                 | FYSEK                     | a                        |
| IPI00022426       | AMBP protein precursor                                 | GECVPGQEPEPILPR           | a                        |
| IPI00029534       | Amidophosphoribosyltransferase                         | GNTISPIIK                 | a                        |
| IPI00328156       | Amine oxidase [flavin-containing] B                    | FVGGSGQYSER               | e                        |
| IPI00328156       | Amine oxidase [flavin-containing] B                    | IMDLLGDR                  | e                        |
| IPI00328156       | Amine oxidase [flavin-containing] B                    | IPEDIWQSEPSVDVPAQPTTFLER  | e                        |
| IPI00328156       | Amine oxidase [flavin-containing] B                    | KFVGGSGQYSER              | c                        |
| IPI00328156       | Amine oxidase [flavin-containing] B                    | YVDLGGSYVGPQNR            | c; d                     |
| IPI00328183       | Amplified in breast cancer 2                           | GLLPK                     | a                        |
| IPI00328183       | Amplified in breast cancer 2                           | LQHALEDQIVRXFR            | a                        |
| IPI00328183       | Amplified in breast cancer 2                           | RSAVVMGR                  | a                        |
| IPI00328183       | Amplified in breast cancer 2                           | VMGSGPK                   | a                        |
| IPI00328183       | Amplified in breast cancer 2                           | VMKVMGSGPK                | a                        |
| IPI00294556       | Amyloid beta A4 precursor protein-binding              | DVFIEK                    | a                        |
| IPI00294556       | Amyloid beta A4 precursor protein-binding              | DVFIEKQK                  | a                        |
| IPI00294556       | Amyloid beta A4 precursor protein-binding              | IKVLNADTQETMMDHPLR        | a                        |
| IPI00294556       | Amyloid beta A4 precursor protein-binding              | QEALGAR                   | a                        |
| IPI00020012       | Amyloid-like protein 1 precursor                       | EWAMADNOSK                | a                        |
| IPI00020012       | Amyloid-like protein 1 precursor                       | FQVHTLQVIEER              | a                        |
| IPI00020012       | Amyloid-like protein 1 precursor                       | MDLEER                    | a                        |
| IPI00020012       | Amyloid-like protein 1 precursor                       | VIALINDQR                 | a                        |
| IPI00020012       | Amyloid-like protein 1 precursor                       | VLEYCRQMPYELQIAR          | a                        |
| IPI00033907       | Anaphase promoting complex subunit 1                   | TMALPVGR                  | a                        |
| IPI00477896       | Anchor protein                                         | ALGLPQPDFHSLILDGA         | a                        |
| IPI00477896       | Anchor protein                                         | GSTLFRQPPR                | a                        |
| IPI00477896       | Anchor protein                                         | MEHPSSPRGAR               | a                        |
| IPI00477896       | Anchor protein                                         | NCLPGASGSGPELDSAP         | a                        |
| IPI00032236       | Angiotensin like 2                                     | MDSEMR                    | a                        |
| IPI00032236       | Angiotensin like 2                                     | QAGAPGSGSGSGSPSEL         | a                        |
| IPI00032236       | Angiotensin like 2                                     | SRRDPGK                   | a                        |
| IPI00032236       | Angiotensin like 2                                     | VQDLSDMVEILI              | a                        |
| IPI00032220       | Angiotensinogen precursor                              | DPTFIPAIQAK               | a                        |
| IPI00032220       | Angiotensinogen precursor                              | FMQAVTGWK                 | a                        |
| IPI00032220       | Angiotensinogen precursor                              | QPFVQGLALYTPVVLPR         | a                        |
| IPI00032220       | Angiotensinogen precursor                              | SLDFTELDVAEEK             | a                        |
| IPI00032220       | Angiotensinogen precursor                              | VLSALQAVQGLLVAQGR         | a                        |
| IPI00074962       | ankyrin 2 isoform 1                                    | APLETTEYPCVEVR            | d                        |
| IPI00074962       | ankyrin 2 isoform 1                                    | ELGDDSLPSSQFLDGMNYLR      | e                        |
| IPI00074962       | ankyrin 2 isoform 1                                    | ETPTGLTEAACDEGQR          | e                        |
| IPI00074962       | ankyrin 2 isoform 1                                    | FLGPVIVEIPHFALR           | d; e                     |
| IPI00074962       | ankyrin 2 isoform 1                                    | GADSGLLPEPVR              | e                        |
| IPI00074962       | ankyrin 2 isoform 1                                    | IPFPVSVPEESHK             | e                        |
| IPI00074962       | ankyrin 2 isoform 1                                    | LGYSVVDITLK               | e                        |
| IPI00074962       | ankyrin 2 isoform 1                                    | LYLQPTSSER                | e                        |
| IPI00074962       | ankyrin 2 isoform 1                                    | MDIVHLMETNTEPQER          | e                        |
| IPI00074962       | ankyrin 2 isoform 1                                    | SPQGLEALPSR               | e                        |
| IPI00074962       | ankyrin 2 isoform 1                                    | TVAPQGDMSIAPDNR           | e                        |
| IPI00472779       | Ankyrin 3                                              | VDVSSAK                   | a                        |
| IPI00478210       | Ankyrin 3 isoform 1                                    | DTEFPNMSNTK               | a                        |
| IPI00478210       | Ankyrin 3 isoform 1                                    | HITKDFPQYFAVYSRIK         | a                        |
| IPI00478210       | Ankyrin 3 isoform 1                                    | LAPLAQTEGGKEIK            | a                        |
| IPI00478210       | Ankyrin 3 isoform 1                                    | MGISASTMTMK               | a                        |
| IPI00478210       | Ankyrin 3 isoform 1                                    | TEMSSKAMPDSFSEQQA         | a                        |
| IPI00478210       | Ankyrin 3 isoform 1                                    | VMELLLK                   | a                        |
| IPI00640458       | Ankyrin G119                                           | TLEQQENFEEVAR             | e                        |
| IPI00167609       | Ankyrin repeat and BTB/POZ domain-containing protein 2 | SAGDGLRR                  | d                        |
| IPI00002286       | Ankyrin repeat domain protein 11                       | AGLLFGMGLSGIR             | a                        |
| IPI00002286       | Ankyrin repeat domain protein 11                       | DARPREK                   | a                        |
| IPI00002286       | Ankyrin repeat domain protein 11                       | KAGLLFGMGLSGIR            | a                        |
| IPI00002286       | Ankyrin repeat domain protein 11                       | KDGPDK                    | a                        |
| IPI00002286       | Ankyrin repeat domain protein 11                       | KETKSNFSISIPK             | a                        |
| IPI00002286       | Ankyrin repeat domain protein 11                       | NPEPQKATPVK               | a                        |
| IPI00549413       | Annexin A1                                             | GLGTDEDTLIEILASR          | d                        |
| IPI00414320       | Annexin A11                                            | DESTNVDMSLAQR             | a                        |
| IPI00414320       | Annexin A11                                            | MTGRDIEK                  | a                        |
| IPI00418169       | annexin A2 isoform 1                                   | TNQLQEINR                 | c                        |
| IPI00329801       | Annexin A5                                             | ADAETLR                   | c                        |
| IPI00329801       | Annexin A5                                             | ALLLLCGEDD                | c; e                     |
| IPI00329801       | Annexin A5                                             | FITIFGTR                  | c; d; e                  |
| IPI00329801       | Annexin A5                                             | GAGTDDHTLIR               | c; d                     |
| IPI00329801       | Annexin A5                                             | GDTSGDYK                  | c; d                     |
| IPI00329801       | Annexin A5                                             | GDTSGDYK                  | c                        |
| IPI00329801       | Annexin A5                                             | GLGTDEESILTLTISR          | d                        |
| IPI00329801       | Annexin A5                                             | GTVDTFDFGDFER             | c; d                     |
| IPI00329801       | Annexin A5                                             | LIVALMKPSR                | c                        |
| IPI00329801       | Annexin A5                                             | LYDAYELK                  | c; d                     |
| IPI00329801       | Annexin A5                                             | NFATSLYSMIK               | c                        |
| IPI00329801       | Annexin A5                                             | QESAAFK                   | c; d                     |
| IPI00329801       | Annexin A5                                             | QVYEEYGGSSLEDDVVDGTSQVYQR | d                        |
| IPI00329801       | Annexin A5                                             | SEIDLFNIR                 | c; d                     |
| IPI00329801       | Annexin A5                                             | SIPAYLAETLYYAMK           | d; e                     |
| IPI00329801       | Annexin A5                                             | WGTDEEK                   | c                        |
| IPI00221226       | Annexin A6                                             | AINEAYK                   | d                        |
| IPI00221226       | Annexin A6                                             | AINEAYKEDYHK              | d                        |
| IPI00221226       | Annexin A6                                             | ALIELATR                  | c; d                     |
| IPI00221226       | Annexin A6                                             | ALLALCGGED                | d; e                     |

| IPI Accession No. | Protein Description            | Peptide Sequence*      | Primary Source Dataset** |
|-------------------|--------------------------------|------------------------|--------------------------|
| IPI00221226       | Annexin A6                     | AMEGAGTDEK             | c                        |
| IPI00221226       | Annexin A6                     | CLIEILASR              | b; d; e                  |
| IPI00221226       | Annexin A6                     | DAFVAIQSVK             | c; d; g                  |
| IPI00221226       | Annexin A6                     | DLEADHIGDTSGHFQK       | c; d                     |
| IPI00221226       | Annexin A6                     | EEGGENLDQAR            | c; d; e                  |
| IPI00221226       | Annexin A6                     | EFIEK                  | c                        |
| IPI00221226       | Annexin A6                     | FMTILCTR               | b; d; e                  |
| IPI00221226       | Annexin A6                     | GAGTDEK                | c                        |
| IPI00221226       | Annexin A6                     | GFGSDKEAILDITSR        | d                        |
| IPI00221226       | Annexin A6                     | GLGTDDEDTHDITHR        | c; d; e                  |
| IPI00221226       | Annexin A6                     | GSHDFPGDFPNQDAEALYTAMK | d                        |
| IPI00221226       | Annexin A6                     | GTVRPANDFNPDAK         | d                        |
| IPI00221226       | Annexin A6                     | ILISLATGHR             | d                        |
| IPI00221226       | Annexin A6                     | LILGLMMPAHYDAK         | d                        |
| IPI00221226       | Annexin A6                     | LVFDEYLK               | c; d                     |
| IPI00221226       | Annexin A6                     | MLVLLQGTR              | d                        |
| IPI00221226       | Annexin A6                     | NDTSGEYK               | d                        |
| IPI00221226       | Annexin A6                     | NDTSGEYKK              | c                        |
| IPI00221226       | Annexin A6                     | QEVCSYK                | c                        |
| IPI00221226       | Annexin A6                     | SEIDLLNIR              | c; d                     |
| IPI00221226       | Annexin A6                     | SEISGLAR               | d                        |
| IPI00221226       | Annexin A6                     | SLEDALSSDTSGHFR        | c; d                     |
| IPI00221226       | Annexin A6                     | SLHQAIEGDTSGDFLK       | c; d                     |
| IPI00221226       | Annexin A6                     | SLYSMIK                | c                        |
| IPI00221226       | Annexin A6                     | STPEYFAER              | c; d                     |
| IPI00221226       | Annexin A6                     | SYPHLR                 | c                        |
| IPI00221226       | Annexin A6                     | VFQEFIK                | c; d                     |
| IPI00221226       | Annexin A6                     | WGTDFAQFVILGNR         | c; d                     |
| IPI00329205       | ANUBL1 protein                 | KTGLASSYECK            | a                        |
| IPI00329205       | ANUBL1 protein                 | LLSPLR                 | a                        |
| IPI00329205       | ANUBL1 protein                 | RLEGIPICR              | a                        |
| IPI00329205       | ANUBL1 protein                 | VKVMIDNR               | a                        |
| IPI0032516        | AP-1 complex subunit mu-1      | FEIPYFTTSGIQR          | e                        |
| IPI00384489       | AP1B1 protein                  | DCEDPNLIR              | d                        |
| IPI00384489       | AP1B1 protein                  | DIPNENAEQFQIR          | d                        |
| IPI00384489       | AP1B1 protein                  | EYATEVDVDFVR           | d; e                     |
| IPI00384489       | AP1B1 protein                  | GYIYWR                 | d                        |
| IPI00384489       | AP1B1 protein                  | NVEGQDMLYQSLK          | d                        |
| IPI00384489       | AP1B1 protein                  | YEQSAER                | d                        |
| IPI00479760       | AP2 associated kinase 1        | LTDPIPTTETSIAPR        | d; e                     |
| IPI00016621       | AP-2 complex subunit alpha-2   | AVDLLYAMCDR            | d                        |
| IPI00016621       | AP-2 complex subunit alpha-2   | FFQPTEMASQDFQR         | d; e                     |
| IPI00016621       | AP-2 complex subunit alpha-2   | FVNLFEVVKPTIQDVLIR     | d                        |
| IPI00016621       | AP-2 complex subunit alpha-2   | QLSNPQQEVQNIK          | d                        |
| IPI00016621       | AP-2 complex subunit alpha-2   | TSPDLVPMGDWTSR         | e                        |
| IPI00005793       | AP-3 complex subunit beta-2    | ATGYQLPDPWEEAFDPVSR    | e                        |
| IPI00005793       | AP-3 complex subunit beta-2    | GAGSEETAASAAFSR        | d                        |
| IPI00005793       | AP-3 complex subunit beta-2    | QLIVPSEQGGALSR         | e                        |
| IPI00025190       | APCL protein                   | AGTEAGPGAR             | a                        |
| IPI00025190       | APCL protein                   | CQNSSLAHESGGILR        | a                        |
| IPI00025190       | APCL protein                   | EAPAPSKAAPAPPAR        | a                        |
| IPI00025190       | APCL protein                   | QAEGEMGARRPEKR         | a                        |
| IPI00025190       | APCL protein                   | SAEQSRGAGKNR           | a                        |
| IPI00025190       | APCL protein                   | VAAPGTTWRR             | a                        |
| IPI00479091       | Apical protein 2               | LGDAFRPASR             | c                        |
| IPI00015180       | Apical-like protein            | AQPAEPQPLGTQVPPEK      | a                        |
| IPI00015180       | Apical-like protein            | IKTTMDLMIEGIFPK        | a                        |
| IPI00015180       | Apical-like protein            | LAEAEATRAADGGR         | a                        |
| IPI00015180       | Apical-like protein            | MVPIK                  | a                        |
| IPI00015180       | Apical-like protein            | QEASVELRRQAGDPGEP      | a                        |
| IPI00479805       | APOA4 protein                  | ALVQQMEQLR             | a                        |
| IPI00479805       | APOA4 protein                  | IDQNVIELK              | a                        |
| IPI00479805       | APOA4 protein                  | LAPLAEDVR              | a                        |
| IPI00479805       | APOA4 protein                  | LLPHANEVSQK            | a                        |
| IPI00479805       | APOA4 protein                  | LTPVADEFK              | a                        |
| IPI00479805       | APOA4 protein                  | LVPFATELHER            | a                        |
| IPI00479805       | APOA4 protein                  | SLAELGGHLDQQVEEFR      | a                        |
| IPI00479805       | APOA4 protein                  | SLAPYAQDTQEK           | a                        |
| IPI00479805       | APOA4 protein                  | VEPYGENFNK             | a                        |
| IPI00299499       | APOBEC-1 stimulating protein   | GHLNSRAHRAPVSR         | a                        |
| IPI00021841       | Apolipoprotein A-I precursor   | DLATVYVDVLYK           | a                        |
| IPI00021841       | Apolipoprotein A-I precursor   | WQEMELYR               | a                        |
| IPI00021841       | Apolipoprotein A-I precursor   | EQLGPTVTEFWDNLEK       | a                        |
| IPI00021841       | Apolipoprotein A-I precursor   | LAARLEALK              | d                        |
| IPI00021841       | Apolipoprotein A-I precursor   | LSPLGEMR               | a                        |
| IPI00021841       | Apolipoprotein A-I precursor   | QGLLPVLESFK            | a                        |
| IPI00021841       | Apolipoprotein A-I precursor   | VQPYLDDFQK             | a; c                     |
| IPI00021841       | Apolipoprotein A-I precursor   | VSFLSALAEVYTK          | a; c; d                  |
| IPI00021854       | Apolipoprotein A-II precursor  | EPCVESLYSQVFQIVTD      | a                        |
| IPI00022229       | Apolipoprotein B-100 precursor | HIYAISAAALSASYK        | a                        |
| IPI00022229       | Apolipoprotein B-100 precursor | LAAYLMLMR              | a                        |
| IPI00022229       | Apolipoprotein B-100 precursor | MEPKDK                 | a                        |
| IPI00022229       | Apolipoprotein B-100 precursor | SHDELPR                | a                        |
| IPI00021856       | Apolipoprotein C-II precursor  | STAAAMSTYTGIFTDQVLS    | a                        |
| IPI00021856       | Apolipoprotein C-II precursor  | TAAQNLVEK              | a                        |
| IPI00021856       | Apolipoprotein C-II precursor  | TYLPAVDEK              | a                        |
| IPI00021857       | Apolipoprotein C-III precursor | DALSSVQESQVAQQR        | a                        |
| IPI00006662       | Apolipoprotein D precursor     | CPNPPVQENFDVNK         | a                        |
| IPI00006662       | Apolipoprotein D precursor     | NILTSNNIVK             | a                        |
| IPI00006662       | Apolipoprotein D precursor     | NPNLPPETVDSLK          | c                        |
| IPI00006662       | Apolipoprotein D precursor     | WYEIEK                 | a; d                     |
| IPI00021842       | Apolipoprotein E precursor     | ALMDETMK               | a                        |
| IPI00021842       | Apolipoprotein E precursor     | ELQAAQAR               | c; d                     |
| IPI00021842       | Apolipoprotein E precursor     | FWDYLR                 | d                        |
| IPI00021842       | Apolipoprotein E precursor     | GEVQAMLGQSTEELR        | c; d                     |
| IPI00021842       | Apolipoprotein E precursor     | LGPLVQGR               | a                        |
| IPI00021842       | Apolipoprotein E precursor     | SELEEQLTPVAEETR        | c; d                     |

| IPI Accession No. | Protein Description                                 | Peptide Sequence*      | Primary Source Dataset** |
|-------------------|-----------------------------------------------------|------------------------|--------------------------|
| IPI00021842       | Apolipoprotein E precursor                          | SWFEPLVEDMQR           | a; c; d                  |
| IPI00021842       | Apolipoprotein E precursor                          | WELALGR                | a; d                     |
| IPI00030739       | Apolipoprotein M                                    | AFLLTFR                | a                        |
| IPI00030739       | Apolipoprotein M                                    | FLLYNR                 | a                        |
| IPI00428490       | Aquaporin 1 splice variant 2                        | VWTSQGVEEYDLDAADDNSR   | c; e                     |
| IPI00556413       | Arachidonate 5-lipoxygenase variant (Fragment)      | RQEIK                  | d                        |
| IPI00477056       | ARAR9245                                            | DAELTRR                | d                        |
| IPI00412650       | Archvillin                                          | ASDPASPHIGR            | a                        |
| IPI00412650       | Archvillin                                          | DASSLYPGTETMGLR        | a                        |
| IPI00412650       | Archvillin                                          | FSSSIENSDSPVR          | a                        |
| IPI00412650       | Archvillin                                          | LPFEKKEVEENVMK         | a                        |
| IPI00412650       | Archvillin                                          | VEVENVMKRR             | a                        |
| IPI00433169       | ARHGEF1 protein                                     | DMIPTEMQR              | a                        |
| IPI00014232       | ARL-6-interacting protein 1                         | AVGWVK                 | d                        |
| IPI00007183       | ARL6IP2                                             | MVHRLSSAQRQR           | a                        |
| IPI00007183       | ARL6IP2                                             | YQDQLEAIEEETVANFK      | a                        |
| IPI00384250       | ARPP-21 protein                                     | GEESQKRFLK             | a                        |
| IPI00384250       | ARPP-21 protein                                     | TSGSRQSSSENLK          | a                        |
| IPI00375144       | Arsenate resistAnce protein ARS2                    | KEDGRQAENDSSNDDK       | a                        |
| IPI00375144       | Arsenate resistAnce protein ARS2                    | LRCELSPGVNR            | a                        |
| IPI00465064       | Aryl hydrocarbon receptor nuclear                   | MAGAMPARGGKR           | a                        |
| IPI00465064       | Aryl hydrocarbon receptor nuclear                   | MASDIPGSVTLVPAPMAA     | a                        |
| IPI00465064       | Aryl hydrocarbon receptor nuclear                   | MAVSHMK                | a                        |
| IPI00465064       | Aryl hydrocarbon receptor nuclear                   | TGTVKKEGQSSMR          | a                        |
| IPI00002230       | Arylacetamide deacetylase-like 1                    | IVQELPQLLDAR           | d                        |
| IPI00002230       | Arylacetamide deacetylase-like 1                    | VFEGPPKPEEPLKR         | d                        |
| IPI00002230       | Arylacetamide deacetylase-like 1                    | YWVDYFK                | e                        |
| IPI00059685       | ASAH1 protein                                       | GQFETYLR               | c                        |
| IPI00059685       | ASAH1 protein                                       | HPFFLDDR               | c                        |
| IPI00059685       | ASAH1 protein                                       | WYVVQINYDR             | d; e                     |
| IPI00020546       | ASH1                                                | EEDLRKR                | a                        |
| IPI00020546       | ASH1                                                | KGTYIGK                | a                        |
| IPI00020546       | ASH1                                                | QGDCVYLMRDSRR          | a                        |
| IPI00020546       | ASH1                                                | SGKMTDEK               | a                        |
| IPI00020546       | ASH1                                                | TFEKNVVRQNK            | a                        |
| IPI00646656       | Asparaginyl-tRNA synthetase variant (Fragment)      | EGSDATGDGTK            | c; d                     |
| IPI00646656       | Asparaginyl-tRNA synthetase variant (Fragment)      | IFDSEILAGYK            | d                        |
| IPI00306960       | Asparaginyl-tRNA synthetase, cytoplasmic            | IGALEGYR               | e                        |
| IPI00219029       | Aspartate aminotransferase, cytoplasmic             | APPSFAEVVPAQPVLVFK     | c; d                     |
| IPI00219029       | Aspartate aminotransferase, cytoplasmic             | DAWAIR                 | d                        |
| IPI00219029       | Aspartate aminotransferase, cytoplasmic             | EDPDFR                 | d                        |
| IPI00219029       | Aspartate aminotransferase, cytoplasmic             | EPESILQVLSQMEK         | c; d                     |
| IPI00219029       | Aspartate aminotransferase, cytoplasmic             | FLFPFDSAYQGFASGNLER    | d                        |
| IPI00219029       | Aspartate aminotransferase, cytoplasmic             | HIYLLPSGR              | c; d                     |
| IPI00219029       | Aspartate aminotransferase, cytoplasmic             | IGADFLAR               | d                        |
| IPI00219029       | Aspartate aminotransferase, cytoplasmic             | INVSGLTTK              | d                        |
| IPI00219029       | Aspartate aminotransferase, cytoplasmic             | ITWSSNPPAQGAR          | c; d; e                  |
| IPI00219029       | Aspartate aminotransferase, cytoplasmic             | IVASTLSNPFLFEWTVGNVK   | c; d                     |
| IPI00219029       | Aspartate aminotransferase, cytoplasmic             | LALGDDSPALK            | c; d                     |
| IPI00219029       | Aspartate aminotransferase, cytoplasmic             | LEALK                  | c                        |
| IPI00219029       | Aspartate aminotransferase, cytoplasmic             | LTADFR                 | d                        |
| IPI00219029       | Aspartate aminotransferase, cytoplasmic             | NYGLYNER               | c; d; e                  |
| IPI00219029       | Aspartate aminotransferase, cytoplasmic             | NLDYVATSIHEAVTK        | c; d                     |
| IPI00219029       | Aspartate aminotransferase, cytoplasmic             | QVEYLVNEK              | d                        |
| IPI00219029       | Aspartate aminotransferase, cytoplasmic             | VGGVQSLGGTGALR         | d; e                     |
| IPI00219029       | Aspartate aminotransferase, cytoplasmic             | VNLGVGAYR              | d                        |
| IPI00219029       | Aspartate aminotransferase, cytoplasmic             | YWDAEK                 | d                        |
| IPI00018206       | Aspartate aminotransferase, mitochondrial precursor | DDNGKPYVLPVSR          | d                        |
| IPI00018206       | Aspartate aminotransferase, mitochondrial precursor | EIATVVK                | c; d                     |
| IPI00018206       | Aspartate aminotransferase, mitochondrial precursor | EYLPGGLAEFCK           | d; e                     |
| IPI00018206       | Aspartate aminotransferase, mitochondrial precursor | FVTVQTSGTGALR          | d; e                     |
| IPI00018206       | Aspartate aminotransferase, mitochondrial precursor | IAAAHLNTPDLR           | d; e                     |
| IPI00018206       | Aspartate aminotransferase, mitochondrial precursor | IGASFLQR               | d                        |
| IPI00018206       | Aspartate aminotransferase, mitochondrial precursor | MNLGVGAYR              | c; d; e                  |
| IPI00018206       | Aspartate aminotransferase, mitochondrial precursor | NLDKEYLPIGGLAEFCK      | d; e                     |
| IPI00018206       | Aspartate aminotransferase, mitochondrial precursor | NMGLYGER               | d; e                     |
| IPI00018206       | Aspartate aminotransferase, mitochondrial precursor | QWLQEVK                | e                        |
| IPI00018206       | Aspartate aminotransferase, mitochondrial precursor | TCGDFDTGAVEDISK        | d                        |
| IPI00018206       | Aspartate aminotransferase, mitochondrial precursor | VESQLK                 | d                        |
| IPI00018206       | Aspartate aminotransferase, mitochondrial precursor | YGAFITMYCK             | c; d                     |
| IPI00005800       | Aspartyl protease 3                                 | GADLGRR                | d                        |
| IPI00297431       | Astroactin 2                                        | MNTLLCK                | c                        |
| IPI00396219       | ATAD3A protein                                      | VRDIAIATR              | a                        |
| IPI00373946       | Atlantin variant                                    | DWSFPYEFYSGADGGAK      | e                        |
| IPI00373946       | Atlantin variant                                    | SESTEQSEK              | d                        |
| IPI00373946       | Atlantin variant                                    | VATNPNFDGK             | d                        |
| IPI00373946       | Atlantin variant                                    | YSGNQHEELQVNR          | d                        |
| IPI00394838       | ATP citrate lyase isoform 2                         | GGPNYQEGLR             | c                        |
| IPI00394838       | ATP citrate lyase isoform 2                         | VMGEVVK                | d                        |
| IPI00440493       | ATP synthase alpha chain, mitochondrial precursor   | APGHPR                 | d; e                     |
| IPI00440493       | ATP synthase alpha chain, mitochondrial precursor   | AVDSLVPVIGR            | d                        |
| IPI00440493       | ATP synthase alpha chain, mitochondrial precursor   | EAYPGDFVYLHSR          | d                        |
| IPI00440493       | ATP synthase alpha chain, mitochondrial precursor   | EGDIVK                 | d                        |
| IPI00440493       | ATP synthase alpha chain, mitochondrial precursor   | EIVTNFLAGFEA           | d; e                     |
| IPI00440493       | ATP synthase alpha chain, mitochondrial precursor   | ELHIGDR                | d                        |
| IPI00440493       | ATP synthase alpha chain, mitochondrial precursor   | EPMQTGIK               | c; d; e                  |
| IPI00440493       | ATP synthase alpha chain, mitochondrial precursor   | EVAFAQFGSDLDAAATQQLLSR | d; e                     |
| IPI00440493       | ATP synthase alpha chain, mitochondrial precursor   | FNDGSDEK               | d                        |
| IPI00440493       | ATP synthase alpha chain, mitochondrial precursor   | GMSLNLEPDNYGVVFGNDK    | d; e                     |
| IPI00440493       | ATP synthase alpha chain, mitochondrial precursor   | HALHYDLSK              | d                        |
| IPI00440493       | ATP synthase alpha chain, mitochondrial precursor   | ILGADTISVDLEETGR       | d                        |
| IPI00440493       | ATP synthase alpha chain, mitochondrial precursor   | ISEQSDAK               | c; d                     |
| IPI00440493       | ATP synthase alpha chain, mitochondrial precursor   | LELAQYR                | d; e                     |
| IPI00440493       | ATP synthase alpha chain, mitochondrial precursor   | LTADAMK                | d; e                     |
| IPI00440493       | ATP synthase alpha chain, mitochondrial precursor   | LTELK                  | d                        |
| IPI00440493       | ATP synthase alpha chain, mitochondrial precursor   | NVQAEEMVEFSSGLK        | d; e                     |
| IPI00440493       | ATP synthase alpha chain, mitochondrial precursor   | QAVAYR                 | d; e                     |

| IPI Accession No. | Protein Description                                                                     | Peptide Sequence*      | Primary Source Dataset** |
|-------------------|-----------------------------------------------------------------------------------------|------------------------|--------------------------|
| IP100440493       | ATP synthase alpha chain, mitochondrial precursor                                       | QGQYSPMAIEEQVAVIYAGVR  | d                        |
| IP100440493       | ATP synthase alpha chain, mitochondrial precursor                                       | QMSLLLR                | d; e                     |
| IP100440493       | ATP synthase alpha chain, mitochondrial precursor                                       | QVAGTMK                | d                        |
| IP100440493       | ATP synthase alpha chain, mitochondrial precursor                                       | STVAQLVK               | d                        |
| IP100440493       | ATP synthase alpha chain, mitochondrial precursor                                       | TGAIVDVPGVEELLGR       | c; d; e                  |
| IP100440493       | ATP synthase alpha chain, mitochondrial precursor                                       | TGTAEMSSLEER           | d; e                     |
| IP100440493       | ATP synthase alpha chain, mitochondrial precursor                                       | TSIAIDTHNQK            | d                        |
| IP100440493       | ATP synthase alpha chain, mitochondrial precursor                                       | VGSAAQTR               | d                        |
| IP100440493       | ATP synthase alpha chain, mitochondrial precursor                                       | VVDALGNAIDGK           | c; d; e                  |
| IP100303476       | ATP synthase beta chain, mitochondrial precursor                                        | AHGGYSVFAGYGER         | d; e                     |
| IP100303476       | ATP synthase beta chain, mitochondrial precursor                                        | AIALGIYVADPLDSTR       | d                        |
| IP100303476       | ATP synthase beta chain, mitochondrial precursor                                        | DQEQDVLLEIDNIFR        | d; e                     |
| IP100303476       | ATP synthase beta chain, mitochondrial precursor                                        | FLSQPFVAVFVETGHMGK     | d                        |
| IP100303476       | ATP synthase beta chain, mitochondrial precursor                                        | FTQAGSEVSAALLGR        | d; e                     |
| IP100303476       | ATP synthase beta chain, mitochondrial precursor                                        | IGLFGAGYVVK            | c; d                     |
| IP100303476       | ATP synthase beta chain, mitochondrial precursor                                        | ILQDYK                 | d; e                     |
| IP100303476       | ATP synthase beta chain, mitochondrial precursor                                        | IMDPNIVGEHYDVAR        | c; d; e                  |
| IP100303476       | ATP synthase beta chain, mitochondrial precursor                                        | IMNVIGPIDER            | d; e                     |
| IP100303476       | ATP synthase beta chain, mitochondrial precursor                                        | IPSAVGYQPLATDMGTMQER   | d                        |
| IP100303476       | ATP synthase beta chain, mitochondrial precursor                                        | IPVGPETLGR             | d                        |
| IP100303476       | ATP synthase beta chain, mitochondrial precursor                                        | LAEHSS                 | d                        |
| IP100303476       | ATP synthase beta chain, mitochondrial precursor                                        | LVLVLAQHLGESTYR        | c; d                     |
| IP100303476       | ATP synthase beta chain, mitochondrial precursor                                        | SLQDHIALGMDLSEEDK      | d; e                     |
| IP100303476       | ATP synthase beta chain, mitochondrial precursor                                        | SLQDHIALGMDLSEEDKLTYSR | e                        |
| IP100303476       | ATP synthase beta chain, mitochondrial precursor                                        | TIAMDGTEGLYR           | d                        |
| IP100303476       | ATP synthase beta chain, mitochondrial precursor                                        | TVLIMELINNVAK          | d; e                     |
| IP100303476       | ATP synthase beta chain, mitochondrial precursor                                        | VALTGLTVAEYFR          | d                        |
| IP100303476       | ATP synthase beta chain, mitochondrial precursor                                        | VALVYVGMNEPPGAR        | c; d; e                  |
| IP100303476       | ATP synthase beta chain, mitochondrial precursor                                        | VLDGAPIK               | c; d; e                  |
| IP100303476       | ATP synthase beta chain, mitochondrial precursor                                        | VLDGAPIKIPVGPETLGR     | d; e                     |
| IP100303476       | ATP synthase beta chain, mitochondrial precursor                                        | VDLLAPYAK              | c; d                     |
| IP100024920       | ATP synthase delta chain, mitochondrial precursor                                       | AEIQR                  | d; e                     |
| IP100024920       | ATP synthase delta chain, mitochondrial precursor                                       | AQAEVGTADEATR          | d; e                     |
| IP100024920       | ATP synthase delta chain, mitochondrial precursor                                       | EAANEALVK              | d; e                     |
| IP100218848       | ATP synthase e chain, mitochondrial                                                     | ELAEEDSILK             | d; e                     |
| IP100218848       | ATP synthase e chain, mitochondrial                                                     | IAAEK                  | e                        |
| IP100218848       | ATP synthase e chain, mitochondrial                                                     | YSALFLGVAYGATR         | d                        |
| IP100215878       | ATP synthase epsilon chain, mitochondrial                                               | TSGSNVK                | d                        |
| IP10009075        | ATP synthase lipid-binding protein, mitochondrial precursor                             | DDTAAK                 | e                        |
| IP100007611       | ATP synthase O subunit, mitochondrial precursor                                         | GEVPTCVTASPLEEATLSELK  | e                        |
| IP100007611       | ATP synthase O subunit, mitochondrial precursor                                         | LVRPPVQVYIEGR          | d                        |
| IP100007611       | ATP synthase O subunit, mitochondrial precursor                                         | SFLSQGVLIK             | d; e                     |
| IP100007611       | ATP synthase O subunit, mitochondrial precursor                                         | TDPSSLGGMIVR           | e                        |
| IP100007611       | ATP synthase O subunit, mitochondrial precursor                                         | VAQILK                 | d; e                     |
| IP100027448       | ATP synthase subunit g, mitochondrial                                                   | AIQSLK                 | e                        |
| IP100027448       | ATP synthase subunit g, mitochondrial                                                   | GIGYDV                 | e                        |
| IP100027448       | ATP synthase subunit g, mitochondrial                                                   | IVNSAQTSFK             | e                        |
| IP100027448       | ATP synthase subunit g, mitochondrial                                                   | LATFWYIAK              | c; d                     |
| IP100027448       | ATP synthase subunit g, mitochondrial                                                   | VELVPTPAEIPR           | d; e                     |
| IP100456747       | ATP synthase, H+ transporting, mitochondrial F0 complex, subunit b, isoform 1           | AQAQPM                 | e                        |
| IP100456747       | ATP synthase, H+ transporting, mitochondrial F0 complex, subunit b, isoform 1           | HVVQSISTQEK            | d                        |
| IP100456747       | ATP synthase, H+ transporting, mitochondrial F0 complex, subunit b, isoform 1           | HYLFDVQR               | c; d                     |
| IP100456747       | ATP synthase, H+ transporting, mitochondrial F0 complex, subunit b, isoform 1           | SOQALVQK               | e                        |
| IP100220487       | ATP synthase, H+ transporting, mitochondrial F0 complex, subunit d isoform a            | IYEYK                  | d                        |
| IP100220487       | ATP synthase, H+ transporting, mitochondrial F0 complex, subunit d isoform a            | TIDWVFAEHPQNK          | d                        |
| IP100220487       | ATP synthase, H+ transporting, mitochondrial F0 complex, subunit d isoform a            | VPVPEDK                | e                        |
| IP100220487       | ATP synthase, H+ transporting, mitochondrial F0 complex, subunit d isoform a            | YTAQVDAEKEKDVK         | d                        |
| IP100220300       | ATP synthase, H+ transporting, mitochondrial F0 complex, subunit F2 isoform 2a          | DFSPSGIFGAFOR          | d                        |
| IP100220300       | ATP synthase, H+ transporting, mitochondrial F0 complex, subunit F2 isoform 2a          | LGELPSWILMR            | d                        |
| IP100456008       | ATP synthase, H+ transporting, mitochondrial F0 complex, subunit F6 isoform b precursor | FEVIEKPA               | d; e                     |
| IP100456008       | ATP synthase, H+ transporting, mitochondrial F0 complex, subunit F6 isoform b precursor | QTSGGPDVASSEYQELER     | c; d; e                  |
| IP100377040       | ATPase inhibitory factor 1 isoform 2 precursor                                          | EQAEER                 | c; d; e                  |
| IP100059139       | ATPase, H+ transporting, lysosomal 31kDa, V1 subunit E isoform 2                        | AEFEFNIEK              | c; d                     |
| IP100514430       | ATPase, H+ transporting, lysosomal 42kDa, V1 subunit C1 isoform B                       | DFQYNEEMAK             | d                        |
| IP100514430       | ATPase, H+ transporting, lysosomal 42kDa, V1 subunit C1 isoform B                       | IDCNLEFK               | c; d                     |
| IP100514430       | ATPase, H+ transporting, lysosomal 42kDa, V1 subunit C1 isoform B                       | LDAFVEGVVK             | e                        |
| IP100514430       | ATPase, H+ transporting, lysosomal 42kDa, V1 subunit C1 isoform B                       | SSNVLSEQDSYLCNVTIFR    | d                        |
| IP100514430       | ATPase, H+ transporting, lysosomal 42kDa, V1 subunit C1 isoform B                       | VGTLDLVGLSDELAK        | d                        |
| IP100432760       | ATPase, H+ transporting, lysosomal, V1 subunit G2 isoform b                             | QQAAMGSGQNLAEVEQATR    | d; e                     |
| IP100216702       | ATP-binding cassette sub-family A                                                       | NLAQMEPLHAEILR         | a                        |
| IP100216702       | ATP-binding cassette sub-family A                                                       | RMSVGGQTTWALLCKNCL     | a                        |
| IP100216702       | ATP-binding cassette sub-family A                                                       | VASAPFLKGR             | a                        |
| IP100479296       | ATP-binding cassette, sub-family A                                                      | GALLTTHYMAEAECVCD      | a                        |
| IP100479296       | ATP-binding cassette, sub-family A                                                      | ILPNEYGHRRPPLFLKS      | a                        |
| IP100479296       | ATP-binding cassette, sub-family A                                                      | LVEMEQLVSSLNKMRR       | a                        |
| IP100479296       | ATP-binding cassette, sub-family A                                                      | MAIMVNGR               | a                        |
| IP100479296       | ATP-binding cassette, sub-family A                                                      | MKALMTMMGLR            | a                        |
| IP100479296       | ATP-binding cassette, sub-family A                                                      | QGRTHLSTHMDADVL        | a                        |
| IP100479296       | ATP-binding cassette, sub-family A                                                      | QVMAEVNK               | a                        |
| IP100479296       | ATP-binding cassette, sub-family A                                                      | SSTFKMLIGDITVTR        | a                        |
| IP100479296       | ATP-binding cassette, sub-family A                                                      | STVDK                  | a                        |
| IP100479296       | ATP-binding cassette, sub-family A                                                      | TISRFMECVNLNK          | a                        |
| IP100414303       | ATP-binding cassette, sub-family A                                                      | GALQGYR                | a                        |
| IP100414303       | ATP-binding cassette, sub-family A                                                      | GNFIPYANEERR           | a                        |
| IP100414303       | ATP-binding cassette, sub-family A                                                      | ILTVESQK               | a                        |
| IP100414303       | ATP-binding cassette, sub-family A                                                      | IRQSSSFEK              | a                        |
| IP100414303       | ATP-binding cassette, sub-family A                                                      | LPSGVGATCVLK           | a                        |
| IP100414303       | ATP-binding cassette, sub-family A                                                      | QFHLLVK                | a                        |
| IP100414303       | ATP-binding cassette, sub-family A                                                      | SPEWIDIVTR             | a                        |
| IP100414303       | ATP-binding cassette, sub-family A                                                      | TEAWESWPWARTFR         | a                        |
| IP100414303       | ATP-binding cassette, sub-family A                                                      | VQGGPPRSFACSAHGER      | a                        |
| IP100042932       | ATP-binding cassette, subfamily B, member 4 isoform B                                   | ELEAAGK                | d                        |
| IP10008463        | ATP-binding cassette, sub-family C, member 1 isoform 6                                  | IMTALK                 | d                        |
| IP100014925       | ATP-dependent DNA helicase Q4                                                           | APKTTAEAYHAGMCSR       | a                        |
| IP100014925       | ATP-dependent DNA helicase Q4                                                           | RALCQLQWDHEPR          | a                        |
| IP100014925       | ATP-dependent DNA helicase Q4                                                           | VGSPSPSSGGKEKRR        | a                        |
| IP100031508       | ATP-dependent helicase DHX8                                                             | EVTTIDPR               | a                        |

| IPi Accession No. | Protein Description                                                   | Peptide Sequence*       | Primary Source Dataset** |
|-------------------|-----------------------------------------------------------------------|-------------------------|--------------------------|
| IP00031508        | ATP-dependent helicase DHX8                                           | IFDPAPGSR               | a                        |
| IP00031508        | ATP-dependent helicase DHX8                                           | QMLGIMDR                | a                        |
| IP00031508        | ATP-dependent helicase DHX8                                           | YEEPNAWRISRAFR          | a                        |
| IP00215638        | ATP-dependent RNA helicase A                                          | GEEFGK                  | a                        |
| IP00215638        | ATP-dependent RNA helicase A                                          | RISAVSVAER              | a                        |
| IP00215638        | ATP-dependent RNA helicase A                                          | YDNGSGYRR               | a                        |
| IP00295138        | Atrial natriuretic peptide-converting                                 | CDVNTGER                | a                        |
| IP00295138        | Atrial natriuretic peptide-converting                                 | NMEMEK                  | a                        |
| IP00295138        | Atrial natriuretic peptide-converting                                 | NMEMEKFLK               | a                        |
| IP00435690        | Autocrine motility factor receptor precursor, isoform 1               | ELLVR                   | e                        |
| IP00005188        | Axin 1                                                                | FAELIHRLEAVQRTR         | a                        |
| IP00005188        | Axin 1                                                                | GETSTATPR               | a                        |
| IP00005188        | Axin 1                                                                | YGVACKR                 | a                        |
| IP00294274        | Axin 2                                                                | APETMPSEQFGGSR          | a                        |
| IP00294274        | Axin 2                                                                | HSLEER                  | a                        |
| IP00294274        | Axin 2                                                                | QLKPKTKTYIR             | a                        |
| IP00294274        | Axin 2                                                                | QLQREMRH                | a                        |
| IP00014845        | Axonemal dynein heavy chain 8                                         | AVIROYNK                | a                        |
| IP00014845        | Axonemal dynein heavy chain 8                                         | DDPPLAR                 | a                        |
| IP00014845        | Axonemal dynein heavy chain 8                                         | IDPVTMDPEK              | a                        |
| IP00014845        | Axonemal dynein heavy chain 8                                         | LFDQSMARSEK             | a                        |
| IP00014845        | Axonemal dynein heavy chain 8                                         | LISESSGEK               | a                        |
| IP00014845        | Axonemal dynein heavy chain 8                                         | LNIPCLGLEINHTIR         | a                        |
| IP00014845        | Axonemal dynein heavy chain 8                                         | NSDILSSPDGKAVIRQYN      | a                        |
| IP00152462        | Axonemal heavy chain dynein type 3                                    | AIKGGQLMSLEEVEFNS       | a                        |
| IP00152462        | Axonemal heavy chain dynein type 3                                    | CSEFELR                 | a                        |
| IP00152462        | Axonemal heavy chain dynein type 3                                    | GHELLLVGIGSGSR          | a                        |
| IP00152462        | Axonemal heavy chain dynein type 3                                    | HGYMIVGDPMGK            | a                        |
| IP00152462        | Axonemal heavy chain dynein type 3                                    | LSLDVYNK                | a                        |
| IP00152462        | Axonemal heavy chain dynein type 3                                    | TLMGALKLNLGGAPEGP       | a                        |
| IP00152462        | Axonemal heavy chain dynein type 3                                    | TLSDVPAPR               | a                        |
| IP00011547        | Baculoviral IAP repeat-containing protein                             | CEFLRSK                 | a                        |
| IP00299635        | Baculoviral IAP repeat-containing protein                             | GYSLASLAK               | a                        |
| IP00011547        | Baculoviral IAP repeat-containing protein                             | SSAEVTPDLQSR            | a                        |
| IP00299635        | Baculoviral IAP repeat-containing protein                             | SVDRSLMYSEANRR          | a                        |
| IP00011547        | Baculoviral IAP repeat-containing protein                             | SYMERLSLR               | a                        |
| IP00299635        | Baculoviral IAP repeat-containing protein                             | TMSHHAALK               | a                        |
| IP00299635        | Baculoviral IAP repeat-containing protein                             | TMSHHAALKR              | a                        |
| IP00299635        | Baculoviral IAP repeat-containing protein                             | YCFEAGRSIAHKCAR         | a                        |
| IP00181743        | BAl1-associated protein 3                                             | DGSYK                   | a                        |
| IP00181743        | BAl1-associated protein 3                                             | SGSPAPPEVDPISLGLR       | a                        |
| IP00181743        | BAl1-associated protein 3                                             | TSKEAQEFVK              | a                        |
| IP00022361        | Band 3 anion transport protein                                        | ADFLEQVLGVFR            | e                        |
| IP00022361        | Band 3 anion transport protein                                        | ATFDEEGRDEYEVAMPV       | e                        |
| IP00022361        | Band 3 anion transport protein                                        | IPDSEATLVLVGR           | e                        |
| IP00022361        | Band 3 anion transport protein                                        | LQEAALAEVLPVPIR         | e                        |
| IP00022361        | Band 3 anion transport protein                                        | VLLPLIFR                | e                        |
| IP00015973        | Band 4.1-like protein 2                                               | DYFGLLFQESPEQKNWL       | a                        |
| IP00015973        | Band 4.1-like protein 2                                               | EEPLPEEQRAK             | a                        |
| IP00015973        | Band 4.1-like protein 2                                               | LVSPQPPK                | a                        |
| IP00015973        | Band 4.1-like protein 2                                               | LVSPQPPKAKFLGSK         | a                        |
| IP00015973        | Band 4.1-like protein 2                                               | CRPVNQEIVR              | a                        |
| IP00024284        | Basement membrane-specific heparan                                    | DARSDFR                 | a                        |
| IP00020153        | Bassoon                                                               | EHRHGDHGR               | a                        |
| IP00020153        | Bassoon                                                               | QAETAR                  | a                        |
| IP00020153        | Bassoon                                                               | SPSVSPDR                | a                        |
| IP00020153        | Bassoon protein                                                       | AEPQAQPLQGR             | d; e                     |
| IP00020153        | Bassoon protein                                                       | AQGPAGQADGPR            | d; e                     |
| IP00020153        | Bassoon protein                                                       | ATSVPGPAQAAAPPEVGR      | d; e                     |
| IP00020153        | Bassoon protein                                                       | DPEPPPEPTYR             | e                        |
| IP00020153        | Bassoon protein                                                       | DSTIAPDSQR              | e                        |
| IP00020153        | Bassoon protein                                                       | EKPLSASDGEGETPQPSR      | d                        |
| IP00020153        | Bassoon protein                                                       | EQQDTAESDDFGSQLR        | e                        |
| IP00020153        | Bassoon protein                                                       | GGEAEDLVGKPYSDASR       | d                        |
| IP00020153        | Bassoon protein                                                       | GLPSSASDMSLQTEEQWEASR   | e                        |
| IP00020153        | Bassoon protein                                                       | GPGGPPQGSR              | e                        |
| IP00020153        | Bassoon protein                                                       | QAAPGPPQSQSPSSR         | e                        |
| IP00020153        | Bassoon protein                                                       | QAQFALQR                | e                        |
| IP00020153        | Bassoon protein                                                       | QPVVYGDYQSR             | e                        |
| IP00020153        | Bassoon protein                                                       | QVEAVQTAPYR             | e                        |
| IP00020153        | Bassoon protein                                                       | SSCEYSPPSLDSEAEALDGGPSR | e                        |
| IP00020153        | Bassoon protein                                                       | STAVPPPGPGPGPGPGGSTR    | d; e                     |
| IP00020153        | Bassoon protein                                                       | YNLPPQVAFPLAR           | e                        |
| IP00477572        | BB399N6.1                                                             | ELDQFVSATLFSK           | a                        |
| IP00514611        | B-cell receptor-associated protein BAP29 isoform a                    | TQAENTNK                | d                        |
| IP00439548        | BCL-6 corepressor long isoform                                        | MLSATPLYGNVHSMNS        | a                        |
| IP00439548        | BCL-6 corepressor long isoform                                        | WEQQVSAADGPKGR          | a                        |
| IP00184094        | Beta galactosyltransferase                                            | SEPGRFAERQAVR           | a                        |
| IP00335449        | Beta isoform of regulatory subunit A.                                 | DSGEPSPRADK             | a                        |
| IP00335449        | beta isoform of regulatory subunit A, protein phosphatase 2 isoform b | LSTIALALGVER            | d                        |
| IP00015902        | Beta platelet-derived growth factor receptor precursor                | LLGEGYK                 | d                        |
| IP00004656        | Beta-2-microglobulin precursor                                        | DEYACR                  | a                        |
| IP00004656        | Beta-2-microglobulin precursor                                        | VEHSDLSFSK              | a; g                     |
| IP00004656        | Beta-2-microglobulin precursor                                        | WDRDM                   | a                        |
| IP00219219        | Beta-galactosidase Binding lectin                                     | LPDGYEFK                | a; c; d; e               |
| IP00219219        | Beta-galactosidase Binding lectin                                     | SFVNLGK                 | a; c; d                  |
| IP00304865        | Beta-glycan                                                           | DPVPSIQLFPGLR           | a                        |
| IP00748037        | Beta-soluble NSF attachment protein                                   | EAVQLMAEAEK             | d                        |
| IP00748037        | Beta-soluble NSF attachment protein                                   | IEEACEMYTR              | c; d; e                  |
| IP00748037        | Beta-soluble NSF attachment protein                                   | LDQWLTMLLR              | d; e                     |
| IP00748037        | Beta-soluble NSF attachment protein                                   | SIQGDGEGDGLK            | c; d; e                  |
| IP00333015        | Beta-spectrin 2 isoform 2                                             | DLTSTNLLK               | d                        |
| IP00642117        | Beta-subunit signal transducing proteins GS/GI                        | AGVLAGHDNR              | c; d; e                  |
| IP00642117        | Beta-subunit signal transducing proteins GS/GI                        | ELAGHTGYLSCCR           | d                        |
| IP00642117        | Beta-subunit signal transducing proteins GS/GI                        | LFVSGACDASAK            | b; c; d; e               |
| IP00032904        | Beta-synuclein                                                        | EGVLYGSK                | d; e                     |
| IP00032904        | Beta-synuclein                                                        | EGVVQGVASVAEK           | d                        |



| IPI Accession No. | Protein Description                                         | Peptide Sequence*           | Primary Source Dataset** |
|-------------------|-------------------------------------------------------------|-----------------------------|--------------------------|
| IP100032904       | Beta-synuclein                                              | EQASHLGGAVFSGAGNIAATGLVK    | d                        |
| IP100032904       | Beta-synuclein                                              | GLSMAR                      | c; d                     |
| IP100032904       | Beta-synuclein                                              | QGVTEAAEK                   | c; d; e                  |
| IP100030774       | Beta-tubulin cofactor D                                     | IMCCVAQASEKIDR              | a                        |
| IP100013452       | Bifunctional aminoacyl-tRNA synthetase                      | FVELPGAEMGK                 | a                        |
| IP100013452       | Bifunctional aminoacyl-tRNA synthetase                      | GKLMIRFDDTINPEK             | a                        |
| IP100013452       | Bifunctional aminoacyl-tRNA synthetase                      | RGDIHQLR                    | a                        |
| IP100013452       | Bifunctional aminoacyl-tRNA synthetase                      | KQDVGKFLVPGAEMGK            | a                        |
| IP100289499       | Bifunctional purine biosynthesis protein PURH               | DVSELTGFPEMLGGR             | e                        |
| IP100556460       | Bladder cancer related CD9 variant                          | DTYNK                       | d                        |
| IP100556460       | Bladder cancer related CD9 variant                          | EVQEFYK                     | c; d; e                  |
| IP100556460       | Bladder cancer related CD9 variant                          | TKDEPQR                     | c                        |
| IP100396263       | blocked early in transport 1 homolog (S. cerevisiae) like   | RMADSLASK                   | c                        |
| IP100401900       | BLOM7 alpha                                                 | GRFMTTEEK                   | a                        |
| IP100401900       | BLOM7 alpha                                                 | QQMPFWMAP                   | a                        |
| IP10030296        | BM-010                                                      | MFVLDEADEMLSR               | d; e                     |
| IP100295601       | BM88 antigen                                                | EAPAEK                      | c; d                     |
| IP100295601       | BM88 antigen                                                | QPGDGAEEDEAASGGPGGR         | c; d; e                  |
| IP100295601       | BM88 antigen                                                | QPPPAAPTAPAK                | d; e                     |
| IP100295601       | BM88 antigen                                                | QPPPAAPTAPAKK               | c; d                     |
| IP100295601       | BM88 antigen                                                | YPPAADGK                    | d                        |
| IP100295601       | BM88 antigen                                                | VPQVTTEAK                   | e                        |
| IP1002315         | Bone morphogenetic protein 3b precursor                     | NVVLK                       | a                        |
| IP100296485       | BPY2 interacting protein 1                                  | EPVVTQDLEGPGR               | e                        |
| IP100299024       | Brain acid soluble protein 1                                | AEGAATEEEGTPK               | c; d; h                  |
| IP100299024       | Brain acid soluble protein 1                                | AEPEKTEGAAEAK               | c; d; e                  |
| IP100299024       | Brain acid soluble protein 1                                | AEPK                        | c                        |
| IP100299024       | Brain acid soluble protein 1                                | AEPKAEPEQEAAPGPAAGGEAPK     | c; d; e                  |
| IP100299024       | Brain acid soluble protein 1                                | APQEQAAPGPAAGGEAPK          | c; d; e                  |
| IP100299024       | Brain acid soluble protein 1                                | AQGPAASAEPEKPVAPAANSQIVTVK  | d; e                     |
| IP100299024       | Brain acid soluble protein 1                                | AQGPAASAEPEKPVAPAANSQIVTVKE | d; e                     |
| IP100299024       | Brain acid soluble protein 1                                | DAAAAK                      | d                        |
| IP100299024       | Brain acid soluble protein 1                                | EGEKDAAAAK                  | d                        |
| IP100299024       | Brain acid soluble protein 1                                | EKPDQDAEGK                  | c; d                     |
| IP100299024       | Brain acid soluble protein 1                                | EKPDQDAEGKAEK               | d                        |
| IP100299024       | Brain acid soluble protein 1                                | ESEPQAAAEPAEK               | c                        |
| IP100299024       | Brain acid soluble protein 1                                | ETPAATEAPSSTPK              | c; d; e; h               |
| IP100299024       | Brain acid soluble protein 1                                | GYNVNDEK                    | d; e                     |
| IP100299024       | Brain acid soluble protein 1                                | KAEGAATEEEGTPK              | c; d; h                  |
| IP100299024       | Brain acid soluble protein 1                                | KGYNVNDEK                   | d                        |
| IP100299024       | Brain acid soluble protein 1                                | KTEAPAAPAAQETK              | c; d; e                  |
| IP100299024       | Brain acid soluble protein 1                                | TEGAAEAK                    | d                        |
| IP100336003       | Brain-derived neurotrophic factor BDNF1                     | QGGGLAYPGVR                 | a                        |
| IP100336003       | Brain-derived neurotrophic factor BDNF1                     | NYLDAANMSMRVR               | a                        |
| IP100010148       | Brain-specific polypeptide PEP-19                           | KVQEEFDIDMDAPETER           | d                        |
| IP100010148       | Brain-specific polypeptide PEP-19                           | TSGENDGQK                   | d                        |
| IP100010148       | Brain-specific polypeptide PEP-19                           | VOEEFDIDMDAPETER            | c; d                     |
| IP100642832       | Branched chain keto acid dehydrogenase E1, beta polypeptide | EYGTQK                      | d                        |
| IP100012500       | BRCA1-binding helicase-like protein                         | QWVEIQYRALNQLGR             | a                        |
| IP100012500       | BRCA1-binding helicase-like protein                         | TVIVEPQGGK                  | a                        |
| IP100375394       | Breakpoint cluster region isoform 2                         | ISSLGSQAMQMERK              | a                        |
| IP100375394       | Breakpoint cluster region isoform 2                         | QSGGKTQYDCK                 | a                        |
| IP100375394       | Breakpoint cluster region isoform 2                         | RQSILFSTEV                  | a                        |
| IP100375394       | Breakpoint cluster region isoform 2                         | RVAEAEAVNK                  | a                        |
| IP100179053       | Breast cancer antiestrogen resistance 3                     | GRPDVAKR                    | a                        |
| IP100179053       | Breast cancer antiestrogen resistance 3                     | NDQSEIMLNHLATAR             | a                        |
| IP100179053       | Breast cancer antiestrogen resistance 3                     | ASQEHHLSEETK                | a                        |
| IP100218982       | Breast cancer type 1 susceptibility protein                 | DTMQHNLK                    | a                        |
| IP100218982       | Breast cancer type 1 susceptibility protein                 | HDSITFFELKLTNAPGSF          | a                        |
| IP100218982       | Breast cancer type 1 susceptibility protein                 | LPCSENR                     | a                        |
| IP100218982       | Breast cancer type 1 susceptibility protein                 | WAGSKETCNDRR                | a                        |
| IP100418194       | Breast cancer-associated antigen                            | KTAPVALEAENRGEEMK           | a                        |
| IP100418194       | Breast cancer-associated antigen                            | KVMAREEMEK                  | a                        |
| IP100418194       | Breast cancer-associated antigen                            | LIGSTEPR                    | a                        |
| IP100418194       | Breast cancer-associated antigen                            | SAARK                       | a                        |
| IP100418194       | Breast cancer-associated antigen                            | VDNQPEELVR                  | a                        |
| IP100002186       | Brefeldin A-inhibited guanine                               | ANFIEADK                    | a                        |
| IP100002186       | Brefeldin A-inhibited guanine                               | GREGSLTGK                   | a                        |
| IP100002186       | Brefeldin A-inhibited guanine                               | IVSTSLDCLQK                 | a                        |
| IP100002186       | Brefeldin A-inhibited guanine                               | LLYNLEMEQMAK                | a                        |
| IP100002186       | Brefeldin A-inhibited guanine                               | QNVASEK                     | a                        |
| IP100002186       | Brefeldin A-inhibited guanine                               | RACQVALDEKAEIEK             | a                        |
| IP100002186       | Brefeldin A-inhibited guanine                               | SDSGKVSTENGADPR             | a                        |
| IP100002186       | Brefeldin A-inhibited guanine                               | SMFVSR                      | a                        |
| IP100002186       | Brefeldin A-inhibited guanine                               | SYGHTFEK                    | a                        |
| IP100002186       | Brefeldin A-inhibited guanine                               | TLKINDEK                    | a                        |
| IP100002186       | Brefeldin A-inhibited guanine                               | YMSSQHLFK                   | a                        |
| IP100457114       | Brefeldin resistant Arf-GEF 2b isoform                      | SPAPSSDFADATTELEDAFSR       | d                        |
| IP100457114       | Brefeldin resistant Arf-GEF 2b isoform                      | VOGEAQK                     | e                        |
| IP100377154       | Bromodomain adjacent to zinc finger                         | CEELHMHVK                   | a                        |
| IP100377154       | Bromodomain adjacent to zinc finger                         | EAWEEEEQVAELLK              | a                        |
| IP100377154       | Bromodomain adjacent to zinc finger                         | LERYSER                     | a                        |
| IP100377154       | Bromodomain adjacent to zinc finger                         | LILCDECNK                   | a                        |
| IP100377154       | Bromodomain adjacent to zinc finger                         | YQDIHSHILARKPNLGLK          | a                        |
| IP100008054       | Bromodomain and PHD finger-containing                       | EQDEK                       | a                        |
| IP100008054       | Bromodomain and PHD finger-containing                       | ICSGLSFQR                   | a                        |
| IP100008054       | Bromodomain and PHD finger-containing                       | LLSDNGNR                    | a                        |
| IP100008054       | Bromodomain and PHD finger-containing                       | VNCYTAFHVTCAQRAGL           | a                        |
| IP100412224       | Bromodomain and WD-repeat domain-containing protein 2       | LATATGAK                    | d                        |
| IP100142768       | Bullous pemphigoid antigen 1 isoform                        | DLIDPCTSEKVSILDMVQ          | a                        |
| IP100142768       | Bullous pemphigoid antigen 1 isoform                        | SELLLNILK                   | a                        |
| IP100384734       | Butyrophilin                                                | AXTDLTFSPLVTRPLGLS          | a                        |
| IP100384734       | Butyrophilin                                                | EMGYXATEQEISAKR             | a                        |
| IP100384734       | Butyrophilin                                                | HQWAXSMWGGK                 | a                        |
| IP100384734       | Butyrophilin                                                | ILVASWGRIR                  | a                        |
| IP100006580       | C/EBP-induced protein                                       | ATQTPLSWQELGGER             | a                        |
| IP100006580       | C/EBP-induced protein                                       | EISKIKQQLQR                 | a                        |



| IPI Accession No. | Protein Description                                                       | Peptide Sequence*       | Primary Source Dataset** |
|-------------------|---------------------------------------------------------------------------|-------------------------|--------------------------|
| IP10006580        | C/EBP-induced protein                                                     | MAGAAAGRGGGAWGP         | a                        |
| IP10034362        | C114 SLIT-like testicular protein                                         | FLPRKGCSSR              | a                        |
| IP100448672       | C1orf16 protein                                                           | LLFQK                   | a                        |
| IP100304374       | C1orf40 protein                                                           | DLTLITER                | a                        |
| IP100304374       | C1orf40 protein                                                           | TPTPPAPILLK             | a                        |
| IP100218342       | C-1-tetrahydrofolate synthase, cytoplasmic                                | EQVPGFTPR               | e                        |
| IP100218342       | C-1-tetrahydrofolate synthase, cytoplasmic                                | GVPTGFILPIR             | e                        |
| IP100418163       | C4B1                                                                      | EAPKYVEEQESR            | a                        |
| IP100418163       | C4B1                                                                      | LGQYASPTAK              | a                        |
| IP100418163       | C4B1                                                                      | NVNFQK                  | a                        |
| IP100418163       | C4B1                                                                      | VDVQAGACEGK             | a                        |
| IP100418163       | C4B1                                                                      | VQPPDCR                 | a                        |
| IP100216412       | C6orf97 protein                                                           | ENEVFK                  | a                        |
| IP100216412       | C6orf97 protein                                                           | SKMLSK                  | a                        |
| IP100216412       | C6orf97 protein                                                           | TEITAAAIK               | a                        |
| IP100301263       | CAD protein                                                               | RLAADFSVPLIDIK          | d                        |
| IP100301263       | CAD protein                                                               | VSTKIGSCMK              | a                        |
| IP100015346       | Cadherin EGF LAG seven-pass G-type                                        | EDVTPGAPVLRVTASDR       | a                        |
| IP100015346       | Cadherin EGF LAG seven-pass G-type                                        | FDSNAPFIASSVLFRIH       | a                        |
| IP100015346       | Cadherin EGF LAG seven-pass G-type                                        | HPELSQGEAVASVHYR        | a                        |
| IP100024046       | Cadherin-13 precursor                                                     | SIVVSPILIPENQR          | d; e                     |
| IP100024046       | Cadherin-13 precursor                                                     | YEVSSPYFK               | a                        |
| IP100031411       | Cadherin-related tumor suppressor                                         | AYDADSSDIDK             | a                        |
| IP100031411       | Cadherin-related tumor suppressor                                         | IRASDWGLPYR             | a                        |
| IP100031411       | Cadherin-related tumor suppressor                                         | ISRTSGVLSTGTGPFDR       | a                        |
| IP100031411       | Cadherin-related tumor suppressor                                         | TLNLDNYVFFGGHIRQQG      | a                        |
| IP100031411       | Cadherin-related tumor suppressor                                         | VYADHGEK                | a                        |
| IP10018574        | calbindin 2 isoform 20k                                                   | SDNFGEK                 | c                        |
| IP100299094       | calcium activated chloride channel 2                                      | HDLEAVK                 | d; e                     |
| IP100384644       | Calcium binding protein                                                   | KLMVIFSKVDVNTDR         | a                        |
| IP100454751       | calcium binding protein 39-like isoform 2                                 | LLGELILDR               | d                        |
| IP100005592       | Calcium/calmodulin-dependent 3',5'-cyclic nucleotide phosphodiesterase 1B | ALMEEFFR                | c                        |
| IP100377185       | Calcium/calmodulin-dependent protein kinase II delta                      | FTDEVQLFEELGK           | e                        |
| IP100172452       | calcium/calmodulin-dependent protein kinase II gamma isoform 6            | FTDDVQLFEELGK           | d; e                     |
| IP100172452       | calcium/calmodulin-dependent protein kinase II gamma isoform 6            | FYFENLSK                | d; e                     |
| IP100745082       | calcium/calmodulin-dependent protein kinase IIA isoform 2                 | FTEEYQLFEELGK           | d; e                     |
| IP100745082       | calcium/calmodulin-dependent protein kinase IIA isoform 2                 | GAFSVVR                 | d; e                     |
| IP100745082       | calcium/calmodulin-dependent protein kinase IIA isoform 2                 | QETVDCLK                | d; e                     |
| IP100745082       | calcium/calmodulin-dependent protein kinase IIA isoform 2                 | TAQSEETR                | d; e                     |
| IP100745082       | calcium/calmodulin-dependent protein kinase IIA isoform 2                 | VTEQLIEAISNGDFESYTK     | e                        |
| IP100386271       | Calcium-binding mitochondrial carrier protein Aralar1                     | DLGIFGLYK               | d; e                     |
| IP100386271       | Calcium-binding mitochondrial carrier protein Aralar1                     | FILGSAVAGGATAVYPIDLVK   | d                        |
| IP100386271       | Calcium-binding mitochondrial carrier protein Aralar1                     | IAPLAGALPNLAELQR        | d; e                     |
| IP100386271       | Calcium-binding mitochondrial carrier protein Aralar1                     | LQVAGEITGPR             | d                        |
| IP100386271       | Calcium-binding mitochondrial carrier protein Aralar1                     | LTLADIER                | e                        |
| IP100386271       | Calcium-binding mitochondrial carrier protein Aralar1                     | NIFLQYASTEVDGER         | d; e                     |
| IP100386271       | Calcium-binding mitochondrial carrier protein Aralar1                     | YEGFFGLYR               | d                        |
| IP100386271       | Calcium-binding mitochondrial carrier protein Aralar1                     | YMTPEDFVQR              | e                        |
| IP100032561       | Calcium-binding protein 39                                                | LLSAEFLQHYDR            | c                        |
| IP100419324       | Calcium-independent phospholipase A2                                      | VEEGK                   | c                        |
| IP100386621       | CALM3 protein                                                             | EAFSLFDK                | c; d; e                  |
| IP100386621       | CALM3 protein                                                             | EAFSLFDKDGDTITTK        | c; d; e                  |
| IP100075248       | Calmodulin                                                                | DGDGTTTK                | d                        |
| IP100075248       | Calmodulin                                                                | DTDSEEIFR               | c; d                     |
| IP100075248       | Calmodulin                                                                | EADDIDGGQVNYEEFVQMMITAK | d; e                     |
| IP100075248       | Calmodulin                                                                | ELGTVMR                 | c; d; e                  |
| IP100075248       | Calmodulin                                                                | MKDTDSEEIFR             | d; e                     |
| IP100075248       | Calmodulin                                                                | YEDKDGNGYISAAELR        | d; e                     |
| IP100383227       | Calnexin (Fragment)                                                       | APVPTGEVYFADSFDR        | d                        |
| IP100020984       | Calnexin precursor                                                        | IVDDWANDGWGLK           | e                        |
| IP100020984       | Calnexin precursor                                                        | KIPNPDFFELEPPR          | d                        |
| IP100020984       | Calnexin precursor                                                        | LHFIFR                  | c; d                     |
| IP100020984       | Calnexin precursor                                                        | SDAEDGGTVSQEEEDR        | c; d; e                  |
| IP100025084       | Calpain small subunit 1                                                   | QFTDR                   | c                        |
| IP100306986       | Calpain small subunit 2                                                   | LGFEFFK                 | c                        |
| IP100011285       | Calpain-1 catalytic subunit                                               | LDETDDPDDYDGR           | d                        |
| IP100020599       | Calreticulin precursor                                                    | EQFLDGDGWTSR            | d; e                     |
| IP100020599       | Calreticulin precursor                                                    | FVLSGK                  | d                        |
| IP100020599       | Calreticulin precursor                                                    | IKDPDASKPEDWDER         | d                        |
| IP100383751       | CALRETICULIN-CALCIUM binding protein (Fragment)                           | EPAVYFK                 | d                        |
| IP100383751       | CALRETICULIN-CALCIUM binding protein (Fragment)                           | GLQTSQDAR               | c; d                     |
| IP100383751       | CALRETICULIN-CALCIUM binding protein (Fragment)                           | QIDNPDYK                | d                        |
| IP100027264       | Calretinin                                                                | ELENFFQLEK              | c                        |
| IP100027264       | Calretinin                                                                | GFLSDLLK                | c; d                     |
| IP100027264       | Calretinin                                                                | LQEYQTILR               | c                        |
| IP100396630       | cAMP-dependent protein kinase catalytic subunit alpha isoform 1           | LEFSFK                  | d                        |
| IP100395654       | cAMP-dependent protein kinase catalytic subunit beta isoform 2            | EFGEF                   | c; d; e                  |
| IP100395654       | cAMP-dependent protein kinase catalytic subunit beta isoform 2            | GSGDTSNFDDYEEEDIR       | e                        |
| IP100395654       | cAMP-dependent protein kinase catalytic subunit beta isoform 2            | ILQAVNPFPLVR            | d                        |
| IP100219774       | cAMP-dependent protein kinase type II-alpha regulatory subunit            | DILLFK                  | d                        |
| IP100554752       | cAMP-dependent protein kinase type II-beta regulatory subunit             | ASVCAEAYNPDEEDDAESR     | e                        |
| IP100554752       | cAMP-dependent protein kinase type II-beta regulatory subunit             | GSFGLALMYNTPR           | e                        |
| IP100554752       | cAMP-dependent protein kinase type II-beta regulatory subunit             | MYESTIESLPLFK           | e                        |
| IP100219592       | cAMP-dependent protein kinase, gamma-catalytic subunit                    | EFSEF                   | d; e                     |
| IP100449690       | CAMP-specific phosphodiesterase                                           | ANMLGADLR               | a                        |
| IP100023868       | Canalicular multispecific organic anion                                   | GITCDIGSMEK             | a                        |
| IP100023868       | Canalicular multispecific organic anion                                   | GTTAYVPPQSQWIONGTIK     | a                        |
| IP100023868       | Canalicular multispecific organic anion                                   | IFNSTDYPPASQRDAIR       | a                        |
| IP100023868       | Canalicular multispecific organic anion                                   | QEKSSQNSGAR             | a                        |
| IP100514858       | CAP, adenylate cyclase-associated protein 1                               | GYADSPSK                | c                        |
| IP100009724       | CAP-binding protein complex interacting                                   | ESSLMHR                 | a                        |
| IP100009724       | CAP-binding protein complex interacting                                   | ESSLMHRMK               | a                        |
| IP100009724       | CAP-binding protein complex interacting                                   | ILFQK                   | a                        |
| IP100009724       | CAP-binding protein complex interacting                                   | ILYKLLACIGIDGPPTVS      | a                        |
| IP100009724       | CAP-binding protein complex interacting                                   | SYDLGDTGR               | a                        |
| IP100218782       | Capping protein (Actin filament) muscle Z-line, beta                      | DYLLCDVNR               | e                        |
| IP100218782       | Capping protein (Actin filament) muscle Z-line, beta                      | YDPPLEDGAMPASAR         | d; e                     |

| IPI Accession No. | Protein Description                                                                     | Peptide Sequence*               | Primary Source Dataset** |
|-------------------|-----------------------------------------------------------------------------------------|---------------------------------|--------------------------|
| IPI00215983       | Carbonic anhydrase 1                                                                    | GGPFSDSYR                       | d                        |
| IPI00215983       | Carbonic anhydrase 1                                                                    | VG EANPK                        | ci; d                    |
| IPI00215983       | Carbonic anhydrase 1                                                                    | VLDALQAIK                       | ci; d                    |
| IPI00218414       | Carbonic anhydrase 2                                                                    | AVQQPDGLAVLGIPLK                | d; g                     |
| IPI00218414       | Carbonic anhydrase 2                                                                    | DFPIAK                          | ci; d                    |
| IPI00218414       | Carbonic anhydrase 2                                                                    | QSPVDIDTHTAK                    | d                        |
| IPI00218414       | Carbonic anhydrase 2                                                                    | SADTFNDFPR                      | ci; d                    |
| IPI00218414       | Carbonic anhydrase 2                                                                    | YGS AKPG LQK                    | c                        |
| IPI00218414       | Carbonic anhydrase 2                                                                    | VVDVLSIK                        | ci; d                    |
| IPI00218414       | Carbonic anhydrase 2                                                                    | YDPSLKPLSVSYDQATSLR             | d                        |
| IPI00218414       | Carbonic anhydrase 2                                                                    | YGFDEGK                         | d                        |
| IPI00295386       | Carbonyl reductase [NADPH] 1                                                            | DVCTELLPLIKPQGR                 | b; d; e                  |
| IPI00295386       | Carbonyl reductase [NADPH] 1                                                            | EGWPSSAYGVTK                    | ci; d                    |
| IPI00295386       | Carbonyl reductase [NADPH] 1                                                            | EYGGDLVLYNNA GIAFK              | d                        |
| IPI00295386       | Carbonyl reductase [NADPH] 1                                                            | FHQLDIDDLQISIR                  | ci; d; e                 |
| IPI00295386       | Carbonyl reductase [NADPH] 1                                                            | GIGLAIVR                        | d                        |
| IPI00295386       | Carbonyl reductase [NADPH] 1                                                            | GQAAVYQQLQAEGLSPR               | ci; d; e                 |
| IPI00295386       | Carbonyl reductase [NADPH] 1                                                            | HLNACCPCGWVR                    | e                        |
| IPI00295386       | Carbonyl reductase [NADPH] 1                                                            | LFSGDVLTAR                      | d                        |
| IPI00295386       | Carbonyl reductase [NADPH] 1                                                            | SETITEELVGLMKNK                 | ci; d                    |
| IPI00295386       | Carbonyl reductase [NADPH] 1                                                            | SPEEGAETPVYLLALLPPDAEGPHGQFVSEK | d                        |
| IPI00296930       | Carboxypeptidase A2 precursor                                                           | IVSDYK                          | e                        |
| IPI00396391       | carboxypeptidase Z isoform 1                                                            | SFDGR                           | c                        |
| IPI00647823       | Cartilage glycoprotein-39                                                               | GQEDASPR                        | c                        |
| IPI00289275       | Cartilage intermediate layer protein                                                    | ASRGGQRQSGVVASLR                | a                        |
| IPI00289275       | Cartilage intermediate layer protein                                                    | EQRPQGQNSNYTVR                  | a                        |
| IPI00289275       | Cartilage intermediate layer protein                                                    | LLTQTDSDGGR                     | a                        |
| IPI00289275       | Cartilage intermediate layer protein                                                    | LYGIRDVR                        | a                        |
| IPI00289275       | Cartilage intermediate layer protein                                                    | RDTERIWSPPSWSK                  | a                        |
| IPI00289275       | Cartilage intermediate layer protein                                                    | VCARPLR                         | a                        |
| IPI00385480       | Caskin-1                                                                                | AVAGLPSGSAGSPAPSPAR             | e                        |
| IPI00385480       | Caskin-1                                                                                | SQEYLLDEGPAPGTPPR               | e                        |
| IPI00478020       | Cask-interacting protein 1                                                              | AEDVGTAR                        | a                        |
| IPI00478020       | Cask-interacting protein 1                                                              | ATTRODSSLGGR                    | a                        |
| IPI00478020       | Cask-interacting protein 1                                                              | EARPGR                          | a                        |
| IPI00478020       | Cask-interacting protein 1                                                              | SGSISGMAGGR                     | a                        |
| IPI00478020       | Cask-interacting protein 1                                                              | VPLPGGSPPEVRR                   | a                        |
| IPI00478020       | Cask-interacting protein 1                                                              | YEGGPLR                         | a                        |
| IPI00002313       | Caspase recruitment domain protein 10                                                   | AQPATPLGSRIR                    | a                        |
| IPI00002313       | Caspase recruitment domain protein 10                                                   | ARGPPGAEK                       | a                        |
| IPI00002313       | Caspase recruitment domain protein 10                                                   | DLDRGTVPYQR                     | a                        |
| IPI00002313       | Caspase recruitment domain protein 10                                                   | VLSGPGSAR                       | a                        |
| IPI00385055       | catenin, alpha 2                                                                        | TSVQTEDDQLIAGQSAR               | e                        |
| IPI00295741       | Cathepsin B precursor                                                                   | EQWPCPTIK                       | a                        |
| IPI00295741       | Cathepsin B precursor                                                                   | GQDHCGESEVAGIPR                 | d                        |
| IPI00295741       | Cathepsin B precursor                                                                   | LPASFDAR                        | a                        |
| IPI00011229       | Cathepsin D precursor                                                                   | AIGAVPLIQGEYMIPEK               | e                        |
| IPI00011229       | Cathepsin D precursor                                                                   | FDGILGMAYPR                     | ci; d; e                 |
| IPI00011229       | Cathepsin D precursor                                                                   | ISVNNVLPVFDNLAMQK               | ci; d                    |
| IPI00011229       | Cathepsin D precursor                                                                   | LSPEDYTLK                       | d                        |
| IPI00011229       | Cathepsin D precursor                                                                   | LVDQNIFSYLSR                    | ci; d                    |
| IPI00011229       | Cathepsin D precursor                                                                   | QVFGATK                         | ci; d                    |
| IPI00011229       | Cathepsin D precursor                                                                   | SSTYVK                          | ci; d                    |
| IPI00011229       | Cathepsin D precursor                                                                   | VGFAEAR                         | ci; d; e                 |
| IPI00011229       | Cathepsin D precursor                                                                   | VSQAGK                          | ci; d                    |
| IPI00011229       | Cathepsin D precursor                                                                   | YNSDK                           | c                        |
| IPI00011229       | Cathepsin D precursor                                                                   | YYTVFDR                         | d                        |
| IPI00294933       | Cation channel TRPM4B                                                                   | IVIVSKMMK                       | a                        |
| IPI00640401       | Cation-transporting ATPase                                                              | DMTSEQLDEILK                    | e                        |
| IPI00640401       | Cation-transporting ATPase                                                              | EIPLDKEMQDAFQNAYMELGGLGER       | d                        |
| IPI00640401       | Cation-transporting ATPase                                                              | EMQDAFQNAYMELGGLGER             | e                        |
| IPI00640401       | Cation-transporting ATPase                                                              | FDTDELNFTPEK                    | d                        |
| IPI00640401       | Cation-transporting ATPase                                                              | GVIATGDR                        | d                        |
| IPI00640401       | Cation-transporting ATPase                                                              | GLTNQR                          | d                        |
| IPI00640401       | Cation-transporting ATPase                                                              | IATLASGLEVGR                    | d                        |
| IPI00640401       | Cation-transporting ATPase                                                              | KYQVDLSK                        | e                        |
| IPI00640401       | Cation-transporting ATPase                                                              | LNIIPMSQVNP                     | d; e                     |
| IPI00640401       | Cation-transporting ATPase                                                              | LSLDELGR                        | d                        |
| IPI00640401       | Cation-transporting ATPase                                                              | NHTEIVFAR                       | d                        |
| IPI00640401       | Cation-transporting ATPase                                                              | SPEFTHENPLETR                   | ci; d                    |
| IPI00640401       | Cation-transporting ATPase                                                              | TMNDLEDSVGEWYEQR                | d; e                     |
| IPI00640401       | Cation-transporting ATPase                                                              | VLGFCQLNLPSGK                   | d                        |
| IPI00289733       | CC3                                                                                     | NVNQEVDFEK                      | a                        |
| IPI00289733       | CC3                                                                                     | SVFILGASGETGR                   | a                        |
| IPI00384080       | CCDC88 protein                                                                          | SSTVSAGAR                       | e                        |
| IPI00011302       | CD59 glycoprotein precursor                                                             | AGLQVYNK                        | d; e                     |
| IPI00011302       | CD59 glycoprotein precursor                                                             | ENELTYCYCK                      | c                        |
| IPI00011302       | CD59 glycoprotein precursor                                                             | FEHCNFNDVTR                     | c                        |
| IPI00513784       | CD72 antigen                                                                            | AVTSPAVGR                       | d                        |
| IPI00382580       | CDC42 GAP-related protein (Fragment)                                                    | NPEQEPIPIVLR                    | e                        |
| IPI00020075       | CDNA FLJ11342 fis, clone PLACE1010800                                                   | ALAEIEFCK                       | ci; d                    |
| IPI00016385       | CDNA FLJ12748 fis, clone NT2RP2001137                                                   | SSAQSSAPPAGAR                   | ci; e                    |
| IPI00030385       | CDNA FLJ13813 fis, clone THYRO1000358, moderately similar to SELENIUM- BINDING LIVER FR | GQSFLLDGETFEVK                  | d                        |
| IPI0064352        | CDNA FLJ14824 fis, clone OVARC1000771, moderately similar to RAS- RELATED PROTEIN RAB-2 | EHGLFMETSAK                     | d                        |
| IPI00329259       | CDNA FLJ16231 fis, clone FEBRA2027609, moderately similar to Zinc finger protein 91     | IDNQVVK                         | e                        |
| IPI00442233       | CDNA FLJ16555 fis, clone SPLEN2016781                                                   | ANQLELETR                       | e                        |
| IPI00339265       | CDNA FLJ16763 fis, clone BRAMY3018357, weakly similar to SNF1-related protein kinase K1 | NEPEQEPIPR                      | e                        |
| IPI00441992       | CDNA FLJ16815 fis, clone THYMU3044175, highly similar to Adenosylhomocysteinase         | GIVEEVTVGVR                     | d                        |
| IPI00441992       | CDNA FLJ16815 fis, clone THYMU3044175, highly similar to Adenosylhomocysteinase         | LYQLSK                          | d                        |
| IPI00441992       | CDNA FLJ16815 fis, clone THYMU3044175, highly similar to Adenosylhomocysteinase         | TPELTIWER                       | d                        |
| IPI00043909       | CDNA FLJ30064 fis, clone ADRGL2000323                                                   | EQGLLR                          | d                        |
| IPI00043524       | CDNA FLJ31711 fis, clone NT2R2006412, highly similar to Rattus norvegicus CDCrel-1A     | QYVGFATLPNQVHR                  | d; e                     |
| IPI00472242       | CDNA FLJ34737 fis, clone MESAN2008415, moderately similar to Mus musculus secretory car | AQTEWNTGTWR                     | e                        |
| IPI00642382       | CDNA FLJ34946 fis, clone NT2RP7008714, weakly similar to SKIN SECRETORY PROTEIN XP2     | EATADQGR                        | d; e                     |
| IPI00642382       | CDNA FLJ34946 fis, clone NT2RP7008714, weakly similar to SKIN SECRETORY PROTEIN XP2     | GVEESPK                         | d                        |
| IPI00642382       | CDNA FLJ34946 fis, clone NT2RP7008714, weakly similar to SKIN SECRETORY PROTEIN XP2     | VLQQLVEEDR                      | d; e                     |
| IPI00167829       | CDNA FLJ36144 fis, clone TESTI2025022, weakly similar to TRICHOHYALIN                   | TRDQEEK                         | d                        |

| IPI Accession No. | Protein Description                                                                     | Peptide Sequence*       | Primary Source Dataset** |
|-------------------|-----------------------------------------------------------------------------------------|-------------------------|--------------------------|
| IP100183085       | CDNA FLJ38330 fis, clone FCBBF3025280, highly similar to NDRG1 PROTEIN                  | EEMQNSVVEVHTYR          | d                        |
| IP100167009       | CDNA FLJ38620 fis, clone OCBBF2007767, weakly similar to Mus musculus E-MAP-115 protein | HAQEAEQER               | cg; d                    |
| IP100384778       | CDNA FLJ39214 fis, clone OCBBF2006332                                                   | WCSNTPPELLATEETER       | e                        |
| IP100334291       | CDNA FLJ39307 fis, clone OCBBF2013208, highly similar to MITOCHONDRIAL LON PROTEASE     | DIALNPLYR               | d; e                     |
| IP100334291       | CDNA FLJ39307 fis, clone OCBBF2013208, highly similar to MITOCHONDRIAL LON PROTEASE     | EIFDIAFFDQAEALAVR       | d; e                     |
| IP100167490       | CDNA FLJ39374 fis, clone PEBLM2008576, highly similar to Homo sapiens TOLLIP protein    | GPVYIGELPQDFLR          | d                        |
| IP100167490       | CDNA FLJ39374 fis, clone PEBLM2008576, highly similar to Homo sapiens TOLLIP protein    | ITPTQQQR                | e                        |
| IP100384768       | CDNA FLJ39402 fis, clone PLACE6011975                                                   | ALALSGLGFFPR            | e                        |
| IP100446683       | CDNA FLJ41352 fis, clone BRAWH2014645                                                   | LGSOQAK                 | c                        |
| IP100394830       | CDNA FLJ44299 fis, clone TRACH2023306                                                   | LYGAQIK                 | e                        |
| IP100411702       | CDNA FLJ44366 fis, clone TRACH3008629, weakly similar to Cadherin- related tumor suppre | SFHLIVEVR               | d                        |
| IP100445114       | CDNA FLJ44603 fis, clone BRACE1000475, highly similar to Delta3,5- delta2,4-dienoyl-CoA | SVQATTENK               | c                        |
| IP100256095       | CDNA FLJ44927 fis, clone BRAMY3015086, highly similar to E4L1_HUMAN Band 4.1-like prote | ETDPSPEER               | cg; d; e                 |
| IP100444599       | CDNA FLJ45088 fis, clone BRAWH3029313                                                   | SAVAGSGGLR              | d                        |
| IP100444803       | CDNA FLJ45153 fis, clone BRAWH3042772, highly similar to Zinc transporter 3             | GAEYALEEGPEEPLPLGNTSVR  | e                        |
| IP100444797       | CDNA FLJ45159 fis, clone BRAWH3043295, highly similar to Inorganic pyrophosphatase      | DKDFAIDIK               | d                        |
| IP100444797       | CDNA FLJ45159 fis, clone BRAWH3043295, highly similar to Inorganic pyrophosphatase      | LKPGYLEATVDWFR          | d                        |
| IP100418845       | CDNA FLJ45740 fis, clone KIDNE2014496                                                   | SRVPHGGSGPWK            | d                        |
| IP100394879       | CDNA FLJ46156 fis, clone TESTI4001569                                                   | NAGLITNPNR              | d                        |
| IP100443942       | CDNA FLJ46256 fis, clone TESTI4023654                                                   | EDLLINK                 | d                        |
| IP100456962       | CDNA FLJ46688 fis, clone TRACH3011538                                                   | RSMDSAEK                | d; e                     |
| IP100304600       | CDNA FLJ90813 fis, clone Y79AA1000967, weakly similar to CALCIUM/CALMODULIN-DEPENDENT P | APEQSTAAQASATDTATPGAADR | d; e                     |
| IP100304600       | CDNA FLJ90813 fis, clone Y79AA1000967, weakly similar to CALCIUM/CALMODULIN-DEPENDENT P | EVFDWLDQGYYSER          | e                        |
| IP100304600       | CDNA FLJ90813 fis, clone Y79AA1000967, weakly similar to CALCIUM/CALMODULIN-DEPENDENT P | GEEAAGYAQESQR           | d; e                     |
| IP100304600       | CDNA FLJ90813 fis, clone Y79AA1000967, weakly similar to CALCIUM/CALMODULIN-DEPENDENT P | NYNQPSVETDR             | e                        |
| IP100304600       | CDNA FLJ90813 fis, clone Y79AA1000967, weakly similar to CALCIUM/CALMODULIN-DEPENDENT P | TEEFCEIFR               | d                        |
| IP100304600       | CDNA FLJ90813 fis, clone Y79AA1000967, weakly similar to CALCIUM/CALMODULIN-DEPENDENT P | YDLGQVIK                | d                        |
| IP100219685       | cell death-regulatory protein GRIM19                                                    | IALLPLQAETDR            | d                        |
| IP100219685       | cell death-regulatory protein GRIM19                                                    | IALLPLQAETDRR           | e                        |
| IP100219685       | cell death-regulatory protein GRIM19                                                    | LQIEDFEAR               | d; e                     |
| IP100219685       | cell death-regulatory protein GRIM19                                                    | WVPPILIGELYGLR          | d; e                     |
| IP100014575       | Cell division control protein 6 homolog                                                 | EMDVIR                  | a                        |
| IP100552502       | cell division cycle 10 isoform 2                                                        | ADTLTPEECQFK            | cg; d; e                 |
| IP100552502       | cell division cycle 10 isoform 2                                                        | ANWEAQOR                | d                        |
| IP100552502       | cell division cycle 10 isoform 2                                                        | DVTNNVHYENYR            | d; e                     |
| IP100552502       | cell division cycle 10 isoform 2                                                        | EIQEHK                  | c                        |
| IP100552502       | cell division cycle 10 isoform 2                                                        | ELEEK                   | d                        |
| IP100552502       | cell division cycle 10 isoform 2                                                        | FEDYLNASER              | d                        |
| IP100552502       | cell division cycle 10 isoform 2                                                        | ILEQSSSR                | d                        |
| IP100552502       | cell division cycle 10 isoform 2                                                        | IYEFPTDDEENK            | cg; d; e                 |
| IP100552502       | cell division cycle 10 isoform 2                                                        | IYEFPTDDEENKLVK         | d; e                     |
| IP100552502       | cell division cycle 10 isoform 2                                                        | LKDSEAEIQR              | cg; d                    |
| IP100552502       | cell division cycle 10 isoform 2                                                        | NLEAQHK                 | d                        |
| IP100552502       | cell division cycle 10 isoform 2                                                        | NLEGYVFANLPQVYR         | d; e                     |
| IP100552502       | cell division cycle 10 isoform 2                                                        | QFEDEK                  | cg; d                    |
| IP100552502       | cell division cycle 10 isoform 2                                                        | SPLAQMEER               | d; e                     |
| IP100552502       | cell division cycle 10 isoform 2                                                        | STLINSLELTDLSPYEPGPSHR  | d                        |
| IP100552502       | cell division cycle 10 isoform 2                                                        | TVQVEQSK                | cg; e                    |
| IP100552502       | cell division cycle 10 isoform 2                                                        | VNIIPLIAK               | cg; d; e                 |
| IP100290086       | Cell division cycle 2-like 2 isoform 1                                                  | EHSRRER                 | a                        |
| IP100290086       | Cell division cycle 2-like 2 isoform 1                                                  | EMAREHSR                | a                        |
| IP100290086       | Cell division cycle 2-like 2 isoform 1                                                  | HEYFR                   | a                        |
| IP100290086       | Cell division cycle 2-like 2 isoform 1                                                  | ISAEGLK                 | a                        |
| IP100290086       | Cell division cycle 2-like 2 isoform 1                                                  | MEKENEGFPITSLR          | a                        |
| IP100337548       | Cell growth regulator with EF hand                                                      | GEAGGQAEAGDAPGP         | a                        |
| IP100337548       | Cell growth regulator with EF hand                                                      | HVEPGEPLASPQEPQA        | a                        |
| IP100337548       | Cell growth regulator with EF hand                                                      | NTQNDFEVHVQVENDEI       | a                        |
| IP100027157       | CENP-F kinetochore protein                                                              | SPTDSPR                 | d                        |
| IP100014264       | Centaurin beta 2                                                                        | DSPFR                   | a                        |
| IP100014264       | Centaurin beta 2                                                                        | FCFEVVSPTK              | a                        |
| IP100383998       | CENTG3 protein                                                                          | VFQDVAQK                | e                        |
| IP100383998       | CENTG3 protein                                                                          | YLTGYVYQESPEGGR         | e                        |
| IP100376383       | CENTRIOLIN                                                                              | DPKHSIMK                | a                        |
| IP100376383       | CENTRIOLIN                                                                              | IPSSHSIPSSMSNMR         | a                        |
| IP100376383       | CENTRIOLIN                                                                              | QLSGRLQLVNK             | a                        |
| IP100376383       | CENTRIOLIN                                                                              | QMANQKDLERR             | a                        |
| IP100376383       | CENTRIOLIN                                                                              | QMEISDAMRTLK            | a                        |
| IP100376383       | CENTRIOLIN                                                                              | RSLQLQTESDAEELERR       | a                        |
| IP100477166       | Centromere protein F, 350/400ka                                                         | ASQTLQATMNRDIAR         | a                        |
| IP100477166       | Centromere protein F, 350/400ka                                                         | HDVHQICDK               | a                        |
| IP100477166       | Centromere protein F, 350/400ka                                                         | LQSEK                   | a                        |
| IP100477166       | Centromere protein F, 350/400ka                                                         | MIDNLK                  | a                        |
| IP100477166       | Centromere protein F, 350/400ka                                                         | MSFVEK                  | a                        |
| IP100477166       | Centromere protein F, 350/400ka                                                         | QLHIAEK                 | a                        |
| IP100477166       | Centromere protein F, 350/400ka                                                         | SHEYNERVRTLMDR          | a                        |
| IP100477166       | Centromere protein F, 350/400ka                                                         | SMEEMK                  | a                        |
| IP100477166       | Centromere protein F, 350/400ka                                                         | TQIEEMARSLK             | a                        |
| IP100477166       | Centromere protein F, 350/400ka                                                         | EVSADGK                 | c                        |
| IP100043201       | Centromere protein J                                                                    | CFDLKILK                | a                        |
| IP100011631       | Centromere/kinetochore protein zw10                                                     | GPLAAAFSSSEVK           | a                        |
| IP100011631       | Centromere/kinetochore protein zw10                                                     | VEEIK                   | a                        |
| IP100011631       | Centromere/kinetochore protein zw10                                                     | EEIEDLKMVLVK            | a                        |
| IP100296365       | Centromeric protein E                                                                   | MQVDLEK                 | a                        |
| IP100296365       | Centromeric protein E                                                                   | SKDELQK                 | a                        |
| IP100296365       | Centromeric protein E                                                                   | DLEIK                   | a                        |
| IP10186006        | Centrosomal colon cancer autoantigen                                                    | NYLPMQGNPPRRSK          | a                        |
| IP100043201       | Centrosomal P4.1-associated protein                                                     | CSPISGLLESHGQK          | a                        |
| IP100456708       | Centrosomal protein 192 kDa isoform 1                                                   | EPIALIR                 | a                        |
| IP100456708       | Centrosomal protein 192 kDa isoform 1                                                   | QSMFFWSGLYIHCDDG        | a                        |
| IP100456708       | Centrosomal protein 192 kDa isoform 1                                                   | TEDTFMSNKPQR            | a                        |
| IP100456708       | Centrosomal protein 192 kDa isoform 1                                                   | ENQDLDRFQMLHNR          | a                        |
| IP100470741       | Centrosome protein Cep135                                                               | IDELNLK                 | a                        |
| IP100470741       | Centrosome protein Cep135                                                               | RGELSAQAQIK             | a                        |
| IP100018149       | Centrosome protein Cep290                                                               | AEMTAAAEER              | a                        |
| IP100018149       | Centrosome protein Cep290                                                               | APTTTMRNLVER            | a                        |
| IP100018149       | Centrosome protein Cep290                                                               | DLFAKADKEK              | a                        |
| IP100018149       | Centrosome protein Cep290                                                               | DREIELTK                | a                        |

| IPI Accession No. | Protein Description                              | Peptide Sequence*    | Primary Source Dataset** |
|-------------------|--------------------------------------------------|----------------------|--------------------------|
| IP100018149       | Centrosome protein Cep290                        | EKIKDLETQLK          | a                        |
| IP100018149       | Centrosome protein Cep290                        | ELEDMEK              | a                        |
| IP100018149       | Centrosome protein Cep290                        | EMQKDPDVK            | a                        |
| IP100018149       | Centrosome protein Cep290                        | HVPEGAETEQLKR        | a                        |
| IP100018149       | Centrosome protein Cep290                        | IDHLEK               | a                        |
| IP100018149       | Centrosome protein Cep290                        | LENELEMAQSSAGGR      | a                        |
| IP100018149       | Centrosome protein Cep290                        | TISSEEEIVQONK        | a                        |
| IP100552715       | chaperonin containing TCP1, subunit 3 isoform c  | AMTGVGEWVYR          | e                        |
| IP100552715       | chaperonin containing TCP1, subunit 3 isoform c  | AVAQALEVIPR          | at; d; e                 |
| IP100552715       | chaperonin containing TCP1, subunit 3 isoform c  | QGGAPDAGQE           | e                        |
| IP100552715       | chaperonin containing TCP1, subunit 3 isoform c  | TAVETAVLLLR          | e                        |
| IP100552590       | chaperonin containing TCP1, subunit 6A isoform b | ALQFLEEVK            | c; d                     |
| IP100552072       | chaperonin containing TCP1, subunit 7 isoform b  | LPIGDVATQYFADR       | e                        |
| IP100025974       | Charged multivesicular body protein 4b           | GGPTPQEAIQR          | c; e                     |
| IP100004946       | chemokine (C-X-C motif) ligand 16                | NAGPTAR              | e                        |
| IP100418277       | Chondroitin synthase 2                           | ALAAQRTRAR           | a                        |
| IP100418277       | Chondroitin synthase 2                           | EMGGHNEK             | a                        |
| IP100418277       | Chondroitin synthase 2                           | HIELIK               | a                        |
| IP100026174       | Cholecystokinins precursor                       | AHLGALLAR            | a                        |
| IP100026174       | Cholecystokinins precursor                       | YIQQAR               | at; d                    |
| IP100306853       | Chondroitin 6-sulfotransferase                   | GNCESIR              | a                        |
| IP100306853       | Chondroitin 6-sulfotransferase                   | LSAELGLR             | a                        |
| IP100306853       | Chondroitin 6-sulfotransferase                   | NSSEQFEK             | a                        |
| IP100306853       | Chondroitin 6-sulfotransferase                   | WLDDEGQDGLREEEVQ     | a                        |
| IP100006249       | Chorion-specific transcription factor            | EWPDGYVR             | a                        |
| IP100026970       | Chromatin-specific transcription                 | DAYYR                | a                        |
| IP100026970       | Chromatin-specific transcription                 | EGFDK                | a                        |
| IP100026970       | Chromatin-specific transcription                 | GSRAALLTER           | a                        |
| IP100026970       | Chromatin-specific transcription                 | SSFDK                | a                        |
| IP100329088       | Chromodomain helicase DNA binding                | ASVHLPRIGHATK        | a                        |
| IP100220289       | Chromodomain heliCase DNA binding                | DDHLSLFDVTCENFISK    | a                        |
| IP100220289       | Chromodomain heliCase DNA binding                | DLIGTAKHGLNLR        | a                        |
| IP100220289       | Chromodomain heliCase DNA binding                | EQGPTPVEKK           | a                        |
| IP100472901       | Chromodomain heliCase DNA binding                | GKNFDEESNASMSTAR     | a                        |
| IP100472901       | Chromodomain heliCase DNA binding                | GKTEGSENLDLKD        | a                        |
| IP100472901       | Chromodomain heliCase DNA binding                | HLNGSLVDGEPMPKR      | a                        |
| IP100472901       | Chromodomain heliCase DNA binding                | HEEAERAAKR           | a                        |
| IP100220289       | Chromodomain heliCase DNA binding                | KSETTVESLELDQGLTNP   | a                        |
| IP100220289       | Chromodomain heliCase DNA binding                | LYESLTVSQMSRTSESLQ   | a                        |
| IP100472901       | Chromodomain heliCase DNA binding                | TQMELLQAGLSRTPTR     | a                        |
| IP100023109       | Chromodomain-helicase-DNA-binding                | DDGLEKSPMK           | a                        |
| IP100023109       | Chromodomain-helicase-DNA-binding                | DKEGDK               | a                        |
| IP100023109       | Chromodomain-helicase-DNA-binding                | DLVEGFTDAEIRR        | a                        |
| IP100023109       | Chromodomain-helicase-DNA-binding                | SQEEEEQKK            | a                        |
| IP100419463       | Chromogranin A                                   | AEGNNQAPGEEEEEEEE    | a                        |
| IP100419463       | Chromogranin A                                   | YPGPQAEQDSEGLSQGL    | a                        |
| IP100419463       | Chromogranin A precursor                         | YPGPQAEQDSEGLSQGLVDR | d                        |
| IP100746813       | Chromosome 10 open reading frame 79              | KDICNAMGSK           | a                        |
| IP100478993       | Chromosome 10 open reading frame 79              | VASMMESKDVIHK        | a                        |
| IP100745272       | Chromosome 17 open reading frame 25              | ALHFVFK              | d                        |
| IP100514416       | Chromosome 20 open reading frame 169             | XAGPDVR              | d                        |
| IP100413868       | Chromosome 6 open reading frame 60               | NIMRADFNK            | a                        |
| IP100413868       | Chromosome 6 open reading frame 60               | SQQDHSASVNGQGEK      | a                        |
| IP100413868       | Chromosome 6 open reading frame 60               | VFNSSPTGVINPLAK      | a                        |
| IP100216412       | Chromosome 6 open reading frame 97               | ENQELK               | d                        |
| IP100178150       | Chromosome-associated kinesin KIF4A              | HLNDLLEDRKILAQDVAQ   | a                        |
| IP100178150       | Chromosome-associated kinesin KIF4A              | QSKTSCADMQK          | a                        |
| IP100028275       | CH-TOG protein                                   | AVELMDRTEPCQALVR     | a                        |
| IP100028275       | CH-TOG protein                                   | GEAVQEELLK           | a                        |
| IP100152653       | Ciliary dynein heavy chain 5                     | AVECISVPK            | a                        |
| IP100152653       | Ciliary dynein heavy chain 5                     | DMNLSK               | a                        |
| IP100152653       | Ciliary dynein heavy chain 5                     | DSNSASNMKQNSLPFR     | a                        |
| IP100152653       | Ciliary dynein heavy chain 5                     | ERLNMFLQLYNESIR      | a                        |
| IP100152653       | Ciliary dynein heavy chain 5                     | IMQK                 | a                        |
| IP100152653       | Ciliary dynein heavy chain 5                     | ITDATNEAKDNVK        | a                        |
| IP100152653       | Ciliary dynein heavy chain 5                     | LVPLTRR              | a                        |
| IP100152653       | Ciliary dynein heavy chain 5                     | NESAKREEGNFDLTS      | a                        |
| IP100152653       | Ciliary dynein heavy chain 5                     | VRHGMMLTGPSGAGK      | a                        |
| IP100152653       | Ciliary dynein heavy chain 5                     | VTRNTLEAIR           | a                        |
| IP100152653       | Ciliary dynein heavy chain 5                     | YGLLIAR              | a                        |
| IP100302453       | Ciliary dynein heavy chain 9                     | DVESOGR              | a                        |
| IP100302453       | Ciliary dynein heavy chain 9                     | EMGMEK               | a                        |
| IP100302453       | Ciliary dynein heavy chain 9                     | NMPTVAGGLRWAQELR     | a                        |
| IP100302453       | Ciliary dynein heavy chain 9                     | QCRKEVCQLK           | a                        |
| IP100302453       | Ciliary dynein heavy chain 9                     | TALQRLCMLR           | a                        |
| IP100456492       | Ciliary rootlet coiled-coil, rootletin           | AVAESEEAR            | a                        |
| IP100456492       | Ciliary rootlet coiled-coil, rootletin           | EGRTLSEEATRLR        | a                        |
| IP100456492       | Ciliary rootlet coiled-coil, rootletin           | LSGVQALALQFESVRR     | a                        |
| IP100456492       | Ciliary rootlet coiled-coil, rootletin           | QMKMLDSENTRLGR       | a                        |
| IP100456492       | Ciliary rootlet coiled-coil, rootletin           | RELLEAQR             | a                        |
| IP100456492       | Ciliary rootlet coiled-coil, rootletin           | RSLEGEQRSR           | a                        |
| IP100456492       | Ciliary rootlet coiled-coil, rootletin           | TGLQEVERSLEAR        | a                        |
| IP100456492       | Ciliary rootlet coiled-coil, rootletin           | ETQENDEFR            | a                        |
| IP100218136       | Cingulin                                         | LDEEVK               | a                        |
| IP100218136       | Cingulin                                         | LNKELEK              | a                        |
| IP100218136       | Cingulin                                         | MEKEEMEEELGEK        | a                        |
| IP100218136       | Cingulin                                         | QELLQLRMEK           | a                        |
| IP100218136       | Cingulin                                         | QVDEAEEIEERLDGLRK    | a                        |
| IP100218136       | Cingulin                                         | STPDLLR              | a                        |
| IP100383539       | citrate synthase precursor, isoform b            | AYAQGISR             | d; e                     |
| IP100383539       | citrate synthase precursor, isoform b            | DYIWNLSNGR           | e                        |
| IP100383539       | citrate synthase precursor, isoform b            | EFALK                | d                        |
| IP100383539       | citrate synthase precursor, isoform b            | GFSPICEQK            | d                        |
| IP100383539       | citrate synthase precursor, isoform b            | GLVYETSVLDPDEGIR     | c; d                     |
| IP100383539       | citrate synthase precursor, isoform b            | VYPGYGHAVLR          | d; e                     |
| IP100025366       | Citrate synthase, mitochondrial precursor        | DILADLIPK            | d; e                     |
| IP100025366       | Citrate synthase, mitochondrial precursor        | IVPNVLEQGK           | c; d; e                  |

| IPI Accession No. | Protein Description                                             | Peptide Sequence*          | Primary Source Dataset** |
|-------------------|-----------------------------------------------------------------|----------------------------|--------------------------|
| IP100025366       | Citrate synthase, mitochondrial precursor                       | LVAQLYK                    | c; d; e                  |
| IP100186968       | Claspin homolog                                                 | ALQKNASRPVVIQESK           | a                        |
| IP100186968       | Claspin homolog                                                 | AVLQK                      | a                        |
| IP100186968       | Claspin homolog                                                 | ENNDGSSEIGK                | a                        |
| IP100186968       | Claspin homolog                                                 | QLGVDVSIKPR                | a                        |
| IP100744586       | Class II beta tubulin isotype                                   | AILVDLEPGTMDSVR            | c; d                     |
| IP100744586       | Class II beta tubulin isotype                                   | ALTVPELTQQMFDISK           | d; e                     |
| IP100744586       | Class II beta tubulin isotype                                   | EEYDPR                     | c; d                     |
| IP100744586       | Class II beta tubulin isotype                                   | EIVHIQAGQCQGNIGAK          | d                        |
| IP100744586       | Class II beta tubulin isotype                                   | FPGQLNADLR                 | c; d                     |
| IP100744586       | Class II beta tubulin isotype                                   | FWEVISDEHGDPTGSYHGDSLDQLER | d; e; f                  |
| IP100744586       | Class II beta tubulin isotype                                   | IMNTFSVMSPSK               | d; e                     |
| IP100744586       | Class II beta tubulin isotype                                   | INYYNEAAGNK                | c; d; e                  |
| IP100744586       | Class II beta tubulin isotype                                   | IREEYDPR                   | c; d                     |
| IP100744586       | Class II beta tubulin isotype                                   | ISEQFTAMFR                 | c; d; e; g               |
| IP100744586       | Class II beta tubulin isotype                                   | MSATFIGNSTAIQELFK          | c; d; e                  |
| IP100744586       | Class II beta tubulin isotype                                   | NMMAACDPR                  | d; e                     |
| IP100744586       | Class II beta tubulin isotype                                   | YLTVAALFR                  | c; d; e                  |
| IP100006612       | Clathrin coat assembly protein AP180                            | IAAAQYSVTGSAVAR            | d; e                     |
| IP100015195       | Cleavage stimulation factor 77kDa                               | EDTRTR                     | a                        |
| IP100396411       | Cleft lip and palate transmembrane protein 1                    | GPAPDQAGPGGAPR             | e                        |
| IP100400826       | clusterin isoform 1                                             | ASSIDELFQDR                | d; e; g                  |
| IP100400826       | Clusterin isoform 1                                             | IDSLLENDR                  | a                        |
| IP100400826       | Clusterin isoform 1                                             | KEDALNETRESETK             | a                        |
| IP100400826       | Clusterin isoform 1                                             | LFDSDPTTVTPVEVSR           | a; d                     |
| IP100400826       | Clusterin isoform 1                                             | TLLSNLEAK                  | a                        |
| IP100017704       | Coactosin-like protein                                          | AGGANYDAQTE                | d; e                     |
| IP100017704       | Coactosin-like protein                                          | EFVISDR                    | d                        |
| IP100017704       | Coactosin-like protein                                          | ELEEDFIK                   | c                        |
| IP100017704       | Coactosin-like protein                                          | EVVQNAK                    | c; d                     |
| IP100017704       | Coactosin-like protein                                          | IDKEACR                    | c                        |
| IP100022937       | Coagulation factor V precursor                                  | ARLNAQGR                   | a                        |
| IP100022937       | Coagulation factor V precursor                                  | AWAYYSVAVNEPK              | a                        |
| IP100022937       | Coagulation factor V precursor                                  | SWWGDYWEPRFR               | a                        |
| IP100017603       | Coagulation factor VIII precursor                               | NMEMVQPK                   | a                        |
| IP100017603       | Coagulation factor VIII precursor                               | SHSIPQANK                  | a                        |
| IP100017603       | Coagulation factor VIII precursor                               | SLNDSTNRTK                 | a                        |
| IP100017603       | Coagulation factor VIII precursor                               | VLFQDNNSHLPAASYRK          | a                        |
| IP100017603       | Coagulation factor VIII precursor                               | YYSSEVNMER                 | a                        |
| IP100220219       | Coatamer subunit beta'                                          | AMGDAEIK                   | c                        |
| IP100002925       | Cocaine- and amphetamine-regulated                              | GTSCNSLLK                  | a                        |
| IP100012386       | Cochlin precursor                                               | GVISNSGGPVR                | a                        |
| IP100012386       | Cochlin precursor                                               | TFEISDIGAK                 | a                        |
| IP100012386       | Cochlin precursor                                               | VYSLPGR                    | a                        |
| IP100012011       | Cofilin-1                                                       | AVLFCLSEDK                 | d                        |
| IP100012011       | Cofilin-1                                                       | AVLFCLSEDKK                | d                        |
| IP100012011       | Cofilin-1                                                       | CTLAEK                     | e                        |
| IP100012011       | Cofilin-1                                                       | EILVGDVGGQTVDDPYATFVK      | c; d; e                  |
| IP100012011       | Cofilin-1                                                       | KSSTPEEVK                  | d                        |
| IP100012011       | Cofilin-1                                                       | MIYASSK                    | c; d                     |
| IP100012011       | Cofilin-1                                                       | MLPKDKCR                   | c                        |
| IP100012011       | Cofilin-1                                                       | NILEEGK                    | c; d                     |
| IP100012011       | Cofilin-1                                                       | SSTPEEVK                   | d; e                     |
| IP100012011       | Cofilin-1                                                       | VFNDMK                     | d; e                     |
| IP100477674       | Coiled-coil domain containing 6                                 | DISMEIDSPENMMRHIF          | a                        |
| IP100477674       | Coiled-coil domain containing 6                                 | RILQEK                     | a                        |
| IP100477674       | Coiled-coil domain containing 6                                 | RSNSPDK                    | a                        |
| IP100043565       | Coiled-coil domain-containing protein 16                        | IGKEFIR                    | d                        |
| IP100000634       | Coiled-coil domain-containing protein 6                         | LDQPSVAPPSPR               | d; e                     |
| IP100015833       | Coiled-coil-helix-coiled-coil-helix domain-containing protein 3 | ESSPSGSK                   | d                        |
| IP100015833       | Coiled-coil-helix-coiled-coil-helix domain-containing protein 3 | YTTEQYQK                   | e                        |
| IP100167087       | COL3A1 protein                                                  | GGAGEPGK                   | c                        |
| IP100398272       | Collagen alpha 1                                                | AEANGDLK                   | a                        |
| IP100025418       | Collagen alpha 1                                                | AGGVGEAGRPERGER            | a                        |
| IP100398272       | Collagen alpha 1                                                | DDVRYQLRQYLMGPR            | a                        |
| IP100025418       | Collagen alpha 1                                                | GDEGPPGDPGLPGK             | a                        |
| IP100025418       | Collagen alpha 1                                                | GDRGEPGPRGQDGNPG           | a                        |
| IP100025418       | Collagen alpha 1                                                | GEDGRPQEGPRGLTG            | a                        |
| IP100025418       | Collagen alpha 1                                                | GERGEPGR                   | a                        |
| IP100025418       | Collagen alpha 1                                                | GFDDGQPGKGDQGEK            | a                        |
| IP100025418       | Collagen alpha 1                                                | GLKGERGVK                  | a                        |
| IP100025418       | Collagen alpha 1                                                | GPLGDPGPR                  | a                        |
| IP100025418       | Collagen alpha 1                                                | GSPGLPGR                   | a                        |
| IP100398272       | Collagen alpha 1                                                | KEMELLIMTK                 | a                        |
| IP100025418       | Collagen alpha 1                                                | QHVPGVMVLLVDEPLRG          | a                        |
| IP100398272       | Collagen alpha 1                                                | VDELERIR                   | a                        |
| IP100021034       | Collagen alpha 1(IV) chain precursor                            | DGHPGLPGPK                 | a                        |
| IP100021034       | Collagen alpha 1(IV) chain precursor                            | GQMGLSFGQPK                | a                        |
| IP100400935       | Collagen alpha 1(XVI) chain precursor                           | GEPGPPGFLPGK               | a                        |
| IP100400935       | Collagen alpha 1(XVI) chain precursor                           | GLPEEFALVLTLLK             | a                        |
| IP100400935       | Collagen alpha 1(XVI) chain precursor                           | GLPGPPGSK                  | a                        |
| IP100400935       | Collagen alpha 1(XVI) chain precursor                           | GPLILR                     | a                        |
| IP100400935       | Collagen alpha 1(XVI) chain precursor                           | GQAGEKGRAGMPGGPG           | a                        |
| IP100293881       | Collagen alpha 2(V) chain precursor                             | GLVGPSPGSRGNPGR            | a                        |
| IP100021033       | Collagen alpha-1(III) chain precursor                           | GAPGPPGPR                  | e                        |
| IP100304962       | Collagen alpha-2(I) chain precursor                             | GEAGAAGPAGPAGPR            | e                        |
| IP100304962       | Collagen alpha-2(I) chain precursor                             | GETGSPGVPAGAVGPR           | e                        |
| IP100386982       | Collagen-like Alzheimer amyloid plaque                          | GDMGDPGMTGEK               | a                        |
| IP100386982       | Collagen-like Alzheimer amyloid plaque                          | GDSGAQGRGPPGQK             | a                        |
| IP100386982       | Collagen-like Alzheimer amyloid plaque                          | IIDYNGNLHEALQR             | a                        |
| IP100386982       | Collagen-like Alzheimer amyloid plaque                          | KHAGK                      | a                        |
| IP100556376       | collapsin response mediator protein 1 isoform 1                 | GMYDGPVYVATPK              | c; d; e                  |
| IP100556376       | collapsin response mediator protein 1 isoform 1                 | GPLVFGPEIAASLTDGTFHYWSK    | d                        |
| IP100556376       | collapsin response mediator protein 1 isoform 1                 | IFNLYPR                    | c; d                     |
| IP100556376       | collapsin response mediator protein 1 isoform 1                 | JNCPYIYIK                  | d                        |
| IP100556376       | collapsin response mediator protein 1 isoform 1                 | MTVVYWDK                   | d                        |
| IP100556376       | collapsin response mediator protein 1 isoform 1                 | SAADHALAR                  | d                        |

| IPi Accession No. | Protein Description                                                            | Peptide Sequence*            | Primary Source Dataset** |
|-------------------|--------------------------------------------------------------------------------|------------------------------|--------------------------|
| IPi00556376       | collapsin response mediator protein 1 isoform 1                                | VFGLQVSR                     | d                        |
| IPi00556376       | collapsin response mediator protein 1 isoform 1                                | YATPAPSAK                    | d                        |
| IPi00164623       | Complement C3 precursor                                                        | EDIPADLSQVDPTESE             | a                        |
| IPi00164623       | Complement C3 precursor                                                        | QFSSFAAFVK                   | a                        |
| IPi00164623       | Complement C3 precursor                                                        | GRLLK                        | a                        |
| IPi00164623       | Complement C3 precursor                                                        | IHWESALLR                    | a                        |
| IPi00032291       | Complement C5 precursor                                                        | VYSLNDLKPAAK                 | a                        |
| IPi00014230       | Complement component 1 Q subcomponent-binding protein, mitochondrial precursor | AFVDFLSDEIK                  | d                        |
| IPi00014230       | Complement component 1 Q subcomponent-binding protein, mitochondrial precursor | AFVDFLSDEIKER                | d; e                     |
| IPi00014230       | Complement component 1 Q subcomponent-binding protein, mitochondrial precursor | ALVLDCHYPEDEVQDEAEASDIFSIR   | d; e                     |
| IPi00014230       | Complement component 1 Q subcomponent-binding protein, mitochondrial precursor | VEEQEPELTSIPNFVVEVIK         | e                        |
| IPi00396023       | Complexin-1                                                                    | MLGGDEKDPDAAK                | d                        |
| IPi00396023       | Complexin-1                                                                    | QALGGATK                     | c; d                     |
| IPi00396023       | Complexin-1                                                                    | YLPGLQDMLK                   | d                        |
| IPi00012759       | Complexin-2                                                                    | AIPAGCGDEEEEEESILDIVLK       | d                        |
| IPi00012759       | Complexin-2                                                                    | YLPGLQDMFK                   | d; e                     |
| IPi00106495       | Condensin subunit 3                                                            | EVHIEK                       | a                        |
| IPi00106495       | Condensin subunit 3                                                            | HLLQGWLK                     | a                        |
| IPi00106495       | Condensin subunit 3                                                            | IKIQLEK                      | a                        |
| IPi00749032       | Conserved hypothetical protein                                                 | IMLEDIK                      | c                        |
| IPi00749032       | Conserved hypothetical protein                                                 | SGDTSFLK                     | d                        |
| IPi00749007       | Conserved hypothetical protein                                                 | TVLNAR                       | d                        |
| IPi00024966       | Contactin 2 precursor                                                          | TTGPGGDPGPAEVHIVR            | a                        |
| IPi00024966       | Contactin 2 precursor                                                          | WDFVVPFR                     | a                        |
| IPi00024966       | Contactin-2 precursor                                                          | GPPPGPGVVVR                  | e                        |
| IPi00171844       | COP9 signalosome complex subunit 4                                             | MYLDRIR                      | a                        |
| IPi00377080       | COP9 signalosome subunit 8 isoform 2                                           | FIPLEPAPVPPINEQQLAR          | d                        |
| IPi00030532       | Copine-5                                                                       | FVDYFFEEK                    | d                        |
| IPi00295469       | Copine-6                                                                       | DIVQFVPPR                    | c; d; e                  |
| IPi00295469       | Copine-6                                                                       | EQSTGQATK                    | d                        |
| IPi00021389       | Copper chaperone for superoxide dismutase                                      | SLIIDEGEDDLGR                | d                        |
| IPi00010863       | Copper transport protein ATOX1                                                 | YDIDLPNKK                    | d                        |
| IPi00016746       | Core-binding factor subunit beta                                               | EEMEVK                       | d                        |
| IPi00298912       | Coronin-2B                                                                     | GLIEPISIVPR                  | e                        |
| IPi00062884       | cortactin isoform b                                                            | TQTPPSVAPQPTTEER             | d; e                     |
| IPi00062884       | cortactin isoform b                                                            | VDQSAVGFEYQGK                | e                        |
| IPi00103869       | Cortactin-binding protein 2                                                    | VDRGNPPPIPK                  | a                        |
| IPi00024270       | Cosmid CRI-JC2015 at D10S289 in                                                | LLSLGAGMPR                   | a                        |
| IPi00024270       | Cosmid CRI-JC2015 at D10S289 in                                                | LRDQPPGAEPTLAGER             | a                        |
| IPi00022977       | Creatine kinase B-type                                                         | AGVHIK                       | c; d                     |
| IPi00022977       | Creatine kinase B-type                                                         | DLFDPIEDR                    | c; d; e; g               |
| IPi00022977       | Creatine kinase B-type                                                         | DWPDAR                       | c; d; e                  |
| IPi00022977       | Creatine kinase B-type                                                         | EVFTR                        | c                        |
| IPi00022977       | Creatine kinase B-type                                                         | FGTGLTQETLFK                 | d                        |
| IPi00022977       | Creatine kinase B-type                                                         | FPAEDEFPLSAHNNHMAK           | d; e                     |
| IPi00022977       | Creatine kinase B-type                                                         | FSEVLK                       | c; d; e                  |
| IPi00022977       | Creatine kinase B-type                                                         | FSEVLR                       | e                        |
| IPi00022977       | Creatine kinase B-type                                                         | GIWHNDNK                     | e                        |
| IPi00022977       | Creatine kinase B-type                                                         | GTGGVDTAAVGGVFDVSNADR        | c; d; g                  |
| IPi00022977       | Creatine kinase B-type                                                         | HGGYKPSDEHK                  | d                        |
| IPi00022977       | Creatine kinase B-type                                                         | LAVEALSSLDGLAGR              | c; d; e; g               |
| IPi00022977       | Creatine kinase B-type                                                         | LEGGQAIIDMLPAQK              | d; e                     |
| IPi00022977       | Creatine kinase B-type                                                         | LGFSVELVQMVVDGVK             | d                        |
| IPi00022977       | Creatine kinase B-type                                                         | LLIEMEQR                     | c; d                     |
| IPi00022977       | Creatine kinase B-type                                                         | LPNLKG                       | d                        |
| IPi00022977       | Creatine kinase B-type                                                         | SMTEAEQQQLIDHFLDKVSPLLASGMAR | d                        |
| IPi00022977       | Creatine kinase B-type                                                         | TDLNPDNLQGGDLDPNYVLSRR       | c; d; e; f; g            |
| IPi00022977       | Creatine kinase B-type                                                         | TELWVWNEEDHLR                | c; d; e                  |
| IPi00022977       | Creatine kinase B-type                                                         | VISMQK                       | c; d; e                  |
| IPi00022977       | Creatine kinase B-type                                                         | VLTPELYAELR                  | c; d; f; g               |
| IPi00022977       | Creatine kinase B-type                                                         | YYALK                        | c; d                     |
| IPi00658109       | Creatine kinase, ubiquitous mitochondrial precursor                            | GIWHNNEK                     | d                        |
| IPi00658109       | Creatine kinase, ubiquitous mitochondrial precursor                            | GLSLPPACTR                   | d; e                     |
| IPi00658109       | Creatine kinase, ubiquitous mitochondrial precursor                            | GTGGVDTAATGGVFDISNLR         | d; e                     |
| IPi00658109       | Creatine kinase, ubiquitous mitochondrial precursor                            | GWEFMWNK                     | c; d; e                  |
| IPi00658109       | Creatine kinase, ubiquitous mitochondrial precursor                            | ILENLR                       | d                        |
| IPi00658109       | Creatine kinase, ubiquitous mitochondrial precursor                            | IPTPVHITK                    | d                        |
| IPi00658109       | Creatine kinase, ubiquitous mitochondrial precursor                            | LYPPSAEYVDLR                 | d; e                     |
| IPi00658109       | Creatine kinase, ubiquitous mitochondrial precursor                            | SFLIWNEDHTR                  | d                        |
| IPi00658109       | Creatine kinase, ubiquitous mitochondrial precursor                            | SCYFDR                       | d; e                     |
| IPi00658109       | Creatine kinase, ubiquitous mitochondrial precursor                            | TVGMVAGDEETEYFADLDFPVIQER    | d                        |
| IPi00658109       | Creatine kinase, ubiquitous mitochondrial precursor                            | VISMKEK                      | d                        |
| IPi00658109       | Creatine kinase, ubiquitous mitochondrial precursor                            | VYVDALSGLK                   | d; e                     |
| IPi00033466       | C-type lectin domain family 11 member A precursor                              | LEGCLKGLR                    | c                        |
| IPi00419894       | CUTL1 protein                                                                  | ADEIEMIMTDLR                 | a                        |
| IPi00419894       | CUTL1 protein                                                                  | ELFIEIQAGSGGAGAS             | a                        |
| IPi00021828       | Cystatin B                                                                     | VHVGDEDFVHLR                 | d                        |
| IPi00032293       | Cystatin C precursor                                                           | ALDFAVGEVKN                  | d                        |
| IPi00032293       | Cystatin C precursor                                                           | LVGGPMDASVEEYGR              | d; e                     |
| IPi00032293       | Cystatin C precursor                                                           | TQPNLNCNCFHQPHLK             | a                        |
| IPi00442073       | Cysteine and glycine-rich protein 1                                            | NFGPK                        | d                        |
| IPi00442073       | Cysteine and glycine-rich protein 1                                            | PNWGGGK                      | d                        |
| IPi00442073       | Cysteine and glycine-rich protein 1                                            | SCYGK                        | d                        |
| IPi00556095       | Cysteine and glycine-rich protein 1 variant (Fragment)                         | CSQAVYAAEK                   | b; c                     |
| IPi00556095       | Cysteine and glycine-rich protein 1 variant (Fragment)                         | GYGVQAGTFLSTDK               | c; d                     |
| IPi00556095       | Cysteine and glycine-rich protein 1 variant (Fragment)                         | GYGVQAGTFLSTDRGESLGK         | c; d; e                  |
| IPi00556095       | Cysteine and glycine-rich protein 1 variant (Fragment)                         | HEEAPGHRPTNPNASK             | d                        |
| IPi00556095       | Cysteine and glycine-rich protein 1 variant (Fragment)                         | VIGAGK                       | c                        |
| IPi00006034       | Cysteine-rich protein 2                                                        | GVNTEGAVGSYIYDRDPEK          | e                        |
| IPi00332296       | Cytochrome b5 reductase h5R.2, isoform 2                                       | ELEELAR                      | d                        |
| IPi00465315       | Cytochrome c                                                                   | ADLIAYLK                     | e; d; e                  |
| IPi00465315       | Cytochrome c                                                                   | GIHWGEDTLMEYLENPK            | c; d; e                  |
| IPi00465315       | Cytochrome c                                                                   | IFIMK                        | d                        |
| IPi00465315       | Cytochrome c                                                                   | KTQAPGYSYTAANK               | d                        |
| IPi00465315       | Cytochrome c                                                                   | MIFVGK                       | c; d                     |
| IPi00465315       | Cytochrome c                                                                   | TGPNHLGLFGR                  | d; e; f; g               |
| IPi00025086       | Cytochrome c oxidase polypeptide Va, mitochondrial precursor                   | AGPHK                        | e                        |

| IPI Accession No. | Protein Description                                                        | Peptide Sequence*    | Primary Source Dataset** |
|-------------------|----------------------------------------------------------------------------|----------------------|--------------------------|
| IP100025086       | Cytochrome c oxidase polypeptide Va, mitochondrial precursor               | GINTLVTYDMVPEPK      | e                        |
| IP100025086       | Cytochrome c oxidase polypeptide Va, mitochondrial precursor               | IDAALR               | d; e                     |
| IP100025086       | Cytochrome c oxidase polypeptide Va, mitochondrial precursor               | ILEVVK               | d; e                     |
| IP100025086       | Cytochrome c oxidase polypeptide Va, mitochondrial precursor               | WVTFYFNKPDIDAWELR    | d; e                     |
| IP100021785       | Cytochrome c oxidase polypeptide Vb, mitochondrial precursor               | EDPNLVFSSINK         | d                        |
| IP100021785       | Cytochrome c oxidase polypeptide Vb, mitochondrial precursor               | EIMLAAK              | e                        |
| IP100021785       | Cytochrome c oxidase polypeptide Vb, mitochondrial precursor               | GLDPYVNLAPK          | d; e                     |
| IP100021785       | Cytochrome c oxidase polypeptide Vb, mitochondrial precursor               | KGLDPYVNLAPK         | d                        |
| IP100021785       | Cytochrome c oxidase polypeptide Vb, mitochondrial precursor               | LVPQQLAH             | c; d; e                  |
| IP100021785       | Cytochrome c oxidase polypeptide Vb, mitochondrial precursor               | SMASGGGVPTDEEQATGLER | d; e                     |
| IP100015972       | Cytochrome c oxidase polypeptide VIc precursor                             | AGIFQSVK             | c; d; e                  |
| IP100015972       | Cytochrome c oxidase polypeptide VIc precursor                             | AYADFYR              | d; e                     |
| IP100015972       | Cytochrome c oxidase polypeptide VIc precursor                             | NYDVMK               | d                        |
| IP100015972       | Cytochrome c oxidase polypeptide VIc precursor                             | NYDVMKDFEEMR         | c; d; e                  |
| IP100026570       | Cytochrome c oxidase polypeptide VIIa-liver/heart, mitochondrial precursor | GGVADALLYR           | c; d; e                  |
| IP100026570       | Cytochrome c oxidase polypeptide VIIa-liver/heart, mitochondrial precursor | LFQEDDEIPLVLYK       | d; e                     |
| IP100013968       | Cytochrome c oxidase polypeptide VIIC, mitochondrial precursor             | WSLLAK               | d                        |
| IP100017510       | Cytochrome c oxidase subunit 2                                             | IFEMGPVFTL           | c; d; e                  |
| IP100017510       | Cytochrome c oxidase subunit 2                                             | TDAIPGR              | c; d; e                  |
| IP100017510       | Cytochrome c oxidase subunit 2                                             | VYLPLEAPIR           | c; d                     |
| IP100006579       | Cytochrome c oxidase subunit 4 isoform 1, mitochondrial precursor          | ASWSSLSMDEK          | d; e                     |
| IP100006579       | Cytochrome c oxidase subunit 4 isoform 1, mitochondrial precursor          | DHPLPEVAHVK          | c; d                     |
| IP100006579       | Cytochrome c oxidase subunit 4 isoform 1, mitochondrial precursor          | ESFAEMNR             | e                        |
| IP100006579       | Cytochrome c oxidase subunit 4 isoform 1, mitochondrial precursor          | SEDFSLPAYMDR         | d; e                     |
| IP100006579       | Cytochrome c oxidase subunit 4 isoform 1, mitochondrial precursor          | VNPIQGLASK           | d; e                     |
| IP100006579       | Cytochrome c oxidase subunit 4 isoform 1, mitochondrial precursor          | WDYEK                | e                        |
| IP100383598       | Cytochrome C oxidase subunit VIa homolog                                   | SSGAHGEESGAR         | c                        |
| IP100216085       | Cytochrome c oxidase subunit VIb isoform 1                                 | AEGTFPGK             | d                        |
| IP100216085       | Cytochrome c oxidase subunit VIb isoform 1                                 | FPNQQTR              | d; e                     |
| IP100216085       | Cytochrome c oxidase subunit VIb isoform 1                                 | GGDISVCEWYQR         | e                        |
| IP100216085       | Cytochrome c oxidase subunit VIb isoform 1                                 | NCWQNYLDFHR          | d; e                     |
| IP100216085       | Cytochrome c oxidase subunit VIb isoform 1                                 | VYQSLCPTSWTWDWEQR    | d; e                     |
| IP100436520       | Cytochrome c oxidase VIIC                                                  | NLPSVVENK            | d; e                     |
| IP100436520       | Cytochrome c oxidase VIIC                                                  | SHVEEGPGK            | c                        |
| IP100029264       | Cytochrome c1, heme protein, mitochondrial precursor                       | DVCTFLR              | d; e                     |
| IP100029264       | Cytochrome c1, heme protein, mitochondrial precursor                       | LFDFYFKPVNSEAAR      | e                        |
| IP100029264       | Cytochrome c1, heme protein, mitochondrial precursor                       | WASEPEHDHR           | c                        |
| IP100337615       | Cytochrome P450                                                            | APLGLLR              | a                        |
| IP100337615       | Cytochrome P450                                                            | FDYTNSEFK            | a                        |
| IP100337615       | Cytochrome P450                                                            | HFGGLGKLSLEPK        | a                        |
| IP100337615       | Cytochrome P450                                                            | LLRAPLGLLR           | a                        |
| IP100025307       | Cytochrome P450 27, mitochondrial                                          | ACLGRRIAELEMQLLAR    | a                        |
| IP100025307       | Cytochrome P450 27, mitochondrial                                          | SLEEIPR              | a                        |
| IP100025307       | Cytochrome P450 27, mitochondrial                                          | YPRNDMELWK           | a                        |
| IP100005859       | Cytokeratin type II                                                        | AKLVDEEALOK          | a                        |
| IP100289561       | Cytokine receptor-like factor 1 precursor                                  | AGIWESEWHSPTAASPTR   | a                        |
| IP100007675       | Cytoplasmic dynein 1 light intermediate chain 1                            | DFQEVVEGEDFASPQR     | e                        |
| IP100011592       | Cytoplasmic dynein 1 light intermediate chain 2                            | DFQDYMEPEEGCQGSQPR   | e                        |
| IP100719600       | cytoplasmic FMR1 interacting protein 2                                     | AVGPSSTQLYMVR        | e                        |
| IP100719600       | cytoplasmic FMR1 interacting protein 2                                     | NVLISVLQAIR          | d; e                     |
| IP100719600       | cytoplasmic FMR1 interacting protein 2                                     | TAIPFTQEPQR          | e                        |
| IP100719600       | cytoplasmic FMR1 interacting protein 2                                     | YAPLHLVLIER          | e                        |
| IP100177728       | Cytosolic nonspecific dipeptidase                                          | YIDENQDR             | d                        |
| IP100413939       | Cytosolic phospholipase A2 beta                                            | FMMPAER              | a                        |
| IP100413939       | Cytosolic phospholipase A2 beta                                            | LQSLADRGEWLVNSGVL    | a                        |
| IP100413939       | Cytosolic phospholipase A2 beta                                            | NVMELK               | a                        |
| IP100478414       | DA14IH5.1                                                                  | CCKVCPGK             | a                        |
| IP100478414       | DA14IH5.1                                                                  | VLYLERSEK            | a                        |
| IP100478414       | DA14IH5.1                                                                  | YPCK                 | a                        |
| IP100025341       | D-beta-hydroxybutyrate dehydrogenase, mitochondrial precursor              | SFLPIR               | e                        |
| IP100217541       | DEAD (Asp-Glu-Ala-Asp) box polypeptide                                     | MIDSMHQSWLPR         | a                        |
| IP100217541       | DEAD (Asp-Glu-Ala-Asp) box polypeptide                                     | TADGYR               | a                        |
| IP100217541       | DEAD (Asp-Glu-Ala-Asp) box polypeptide                                     | YEEALSK              | a                        |
| IP100217357       | Death inducer with SAP domain DIS                                          | DDRSREK              | a                        |
| IP100217357       | Death inducer with SAP domain DIS                                          | EEQKELEK             | a                        |
| IP100217357       | Death inducer with SAP domain DIS                                          | QEEIERQR             | a                        |
| IP100217357       | Death inducer with SAP domain DIS                                          | TQMTINR              | a                        |
| IP100021250       | Death-associated protein kinase 1                                          | DMKVLK               | a                        |
| IP100021250       | Death-associated protein kinase 1                                          | FLSENK               | a                        |
| IP100021250       | Death-associated protein kinase 1                                          | NHLQEIR              | a                        |
| IP100477553       | Dedicator of cyto-kinesis 1                                                | FIPEMVGPILEMTLIPETE  | a                        |
| IP100477553       | Dedicator of cyto-kinesis 1                                                | IMPSSLDLDRR          | a                        |
| IP100477553       | Dedicator of cyto-kinesis 1                                                | QAQFVENIVK           | a                        |
| IP100470727       | DeDicator of cytokinesis 7                                                 | CEDALRK              | a                        |
| IP100470727       | DeDicator of cytokinesis 7                                                 | GQLGTYTIASPPER       | a                        |
| IP100470727       | DeDicator of cytokinesis 7                                                 | MNSLTFKK             | a                        |
| IP100470727       | DeDicator of cytokinesis 7                                                 | RMSISDDTIPR          | a                        |
| IP100217985       | Dedicator of cytokinesis protein 3                                         | HPGDAEK              | a                        |
| IP100217985       | Dedicator of cytokinesis protein 3                                         | LGEPDVMIPGDIR        | a                        |
| IP100217985       | Dedicator of cytokinesis protein 3                                         | NLMK                 | a                        |
| IP100217985       | Dedicator of cytokinesis protein 3                                         | QDHIQEMRALEYLFK      | a                        |
| IP100181526       | DeletedD in lung aD esophageal cancer 1                                    | AKERTR               | a                        |
| IP100181526       | DeletedD in lung aD esophageal cancer 1                                    | LQDFAVGPLK           | a                        |
| IP100181526       | DeletedD in lung aD esophageal cancer 1                                    | LTQLALAQRPPELLR      | a                        |
| IP100011416       | Delta3,5-delta2,4-dienoyl-CoA isomerase, mitochondrial precursor           | VQETFNVIER           | e                        |
| IP100442121       | delta-aminolevulinic acid dehydratase isoform a                            | CVLIFGVFSR           | c                        |
| IP100442121       | delta-aminolevulinic acid dehydratase isoform a                            | GSAADSESPAIEAHLRL    | c; e                     |
| IP100005665       | DEP domain containing protein 5                                            | FGFVQDK              | a                        |
| IP100005665       | DEP domain containing protein 5                                            | HPSTGVQLLSEQK        | a                        |
| IP100005665       | DEP domain containing protein 5                                            | HYINK                | a                        |
| IP100005665       | DEP domain containing protein 5                                            | IVTDK                | a                        |
| IP100005665       | DEP domain containing protein 5                                            | SQAALLAATVPEQR       | a                        |
| IP100157556       | DFL1.295                                                                   | GADIK                | d                        |
| IP100303136       | Diacylglycerol kinase delta2                                               | DEHPEKCR             | a                        |
| IP100396602       | Diacylglycerol kinase eta2                                                 | DFVARVEK             | a                        |
| IP100396602       | Diacylglycerol kinase eta2                                                 | IVHKNAQMLTR          | a                        |
| IP100396602       | Diacylglycerol kinase eta2                                                 | TLCETVK              | a                        |



| IPI Accession No. | Protein Description                                                                     | Peptide Sequence*          | Primary Source Dataset** |
|-------------------|-----------------------------------------------------------------------------------------|----------------------------|--------------------------|
| IP10036602        | Diacylglycerol kinase eta2                                                              | VYTSQQR                    | a                        |
| IP10030876        | Diaphanous 1                                                                            | DDAMAAVPAK                 | a                        |
| IP10030876        | Diaphanous 1                                                                            | ETEEKMRR                   | a                        |
| IP10030876        | Diaphanous 1                                                                            | QMPEPOLK                   | a                        |
| IP100219036       | Dicer1                                                                                  | FLLFTDFLRK                 | a                        |
| IP100219036       | Dicer1                                                                                  | FMEDEIK                    | a                        |
| IP100219036       | Dicer1                                                                                  | MDSEQSPSIGYSSR             | a                        |
| IP100219036       | Dicer1                                                                                  | NEMQGMDSCLR                | a                        |
| IP100219036       | Dicer1                                                                                  | NEMQGMDSCLR                | a                        |
| IP100219036       | Dicer1                                                                                  | QHSPGVLTLR                 | a                        |
| IP10002714        | Dickkopf related protein-3 precursor                                                    | SAVEEMAEFAAAK              | a                        |
| IP100743644       | dihydropyrimidine dehydrogenase precursor                                               | EANLAASFGK                 | d; e                     |
| IP100743644       | dihydropyrimidine dehydrogenase precursor                                               | IPNIYAIGDVVAGPMLAHK        | d                        |
| IP100743644       | dihydropyrimidine dehydrogenase precursor                                               | NLGLLEELGELDPR             | c; d; e                  |
| IP100743644       | dihydropyrimidine dehydrogenase precursor                                               | NQYTATK                    | e                        |
| IP100743644       | dihydropyrimidine dehydrogenase precursor                                               | SEEQLKEEGIEYK              | d                        |
| IP100604707       | Dihydropyrimidine S-acetyltransferase (Fragment)                                        | VFVSPFLAK                  | e                        |
| IP100604707       | Dihydropyrimidine S-acetyltransferase (Fragment)                                        | VPLPSLPTMQAGTIAR           | e                        |
| IP100604707       | Dihydropyrimidine S-acetyltransferase (Fragment)                                        | VYDGAAGQWLAEFR             | e                        |
| IP100304802       | Dihydropyrimidine-residue                                                               | MLSRRCYSR                  | a                        |
| IP100420108       | Dihydropyrimidine-residue succinyltransferase component of 2-oxoglutarate dehydrogenase | DYDISVAVATPR               | d; e                     |
| IP100420108       | Dihydropyrimidine-residue succinyltransferase component of 2-oxoglutarate dehydrogenase | GLVVPVIR                   | a; d                     |
| IP100420108       | Dihydropyrimidine-residue succinyltransferase component of 2-oxoglutarate dehydrogenase | LGFMFAFK                   | d                        |
| IP100420108       | Dihydropyrimidine-residue succinyltransferase component of 2-oxoglutarate dehydrogenase | NVEAMNFADIER               | d                        |
| IP100420108       | Dihydropyrimidine-residue succinyltransferase component of 2-oxoglutarate dehydrogenase | TPAFASVTEGDVIR             | c; d; e                  |
| IP100420108       | Dihydropyrimidine-residue succinyltransferase component of 2-oxoglutarate dehydrogenase | VEGGTFLPLR                 | d; e                     |
| IP100420108       | Dihydropyrimidine-residue succinyltransferase component of 2-oxoglutarate dehydrogenase | VLLLDL                     | a; d; e                  |
| IP100014439       | Dihydropteridine reductase                                                              | EGGLTLGAK                  | d                        |
| IP100014439       | Dihydropteridine reductase                                                              | GAVHQLCQLAGK               | d                        |
| IP100014439       | Dihydropteridine reductase                                                              | MTDSFTEQADQVTAEVGK         | d                        |
| IP100014439       | Dihydropteridine reductase                                                              | NCDLMWK                    | d                        |
| IP100014439       | Dihydropteridine reductase                                                              | NRPSGSLIQVTTTEGR           | d                        |
| IP100014439       | Dihydropteridine reductase                                                              | NSGMPPGAAALVPLTLDTPMNR     | d                        |
| IP100014439       | Dihydropteridine reductase                                                              | QSIWTSISSLATK              | d                        |
| IP100014439       | Dihydropteridine reductase                                                              | TELTPIYF                   | c; d; e                  |
| IP100014439       | Dihydropteridine reductase                                                              | VLYYGR                     | c                        |
| IP100514623       | Dihydropyrimidine-like 4                                                                | MDENEFAVVTSTNAAK           | d; e                     |
| IP100257508       | Dihydropyrimidine-related protein 2                                                     | AITIANQINCLYITK            | d                        |
| IP100257508       | Dihydropyrimidine-related protein 2                                                     | ANITSLG                    | e                        |
| IP100257508       | Dihydropyrimidine-related protein 2                                                     | AVVTGK                     | c; d                     |
| IP100257508       | Dihydropyrimidine-related protein 2                                                     | DIGALAQVHAENGDAEEQQR       | d; f; g                  |
| IP100257508       | Dihydropyrimidine-related protein 2                                                     | DNFTLPEGTNGTEER            | d                        |
| IP100257508       | Dihydropyrimidine-related protein 2                                                     | EWADSK                     | d                        |
| IP100257508       | Dihydropyrimidine-related protein 2                                                     | FQLTDCQYEVLSVIR            | d                        |
| IP100257508       | Dihydropyrimidine-related protein 2                                                     | FQMPDQGMTSADDFQGTK         | d; e                     |
| IP100257508       | Dihydropyrimidine-related protein 2                                                     | GIQEEMALVK                 | c; d; e                  |
| IP100257508       | Dihydropyrimidine-related protein 2                                                     | GLYDGPVCEVSVTPK            | c; d; h                  |
| IP100257508       | Dihydropyrimidine-related protein 2                                                     | GSPLVVISQK                 | c; d; e                  |
| IP100257508       | Dihydropyrimidine-related protein 2                                                     | GTVVYGEPTASLGTGSHYWSK      | c; d; e                  |
| IP100257508       | Dihydropyrimidine-related protein 2                                                     | IAYGSADLVIVDPDSVK          | c; d                     |
| IP100257508       | Dihydropyrimidine-related protein 2                                                     | ILDLTGTPGPHVLSRPEEVAEAVNR  | d; e                     |
| IP100257508       | Dihydropyrimidine-related protein 2                                                     | IVAPPGGR                   | c; d                     |
| IP100257508       | Dihydropyrimidine-related protein 2                                                     | IVLEDGTLHVTEGSR            | d                        |
| IP100257508       | Dihydropyrimidine-related protein 2                                                     | IVNDDQSFYADTYMEDGLIK       | d                        |
| IP100257508       | Dihydropyrimidine-related protein 2                                                     | KPPDFYK                    | c; d                     |
| IP100257508       | Dihydropyrimidine-related protein 2                                                     | MDENQFVAVTSTNAAK           | d                        |
| IP100257508       | Dihydropyrimidine-related protein 2                                                     | MSVIWDK                    | c; d                     |
| IP100257508       | Dihydropyrimidine-related protein 2                                                     | MVIPGGIDVHTR               | d                        |
| IP100257508       | Dihydropyrimidine-related protein 2                                                     | NLHQSGFSLSGAQIDNIPR        | d; e; f; g; h            |
| IP100257508       | Dihydropyrimidine-related protein 2                                                     | QIGENLIVPGVVK              | c; d; e                  |
| IP100257508       | Dihydropyrimidine-related protein 2                                                     | QQAPPVR                    | d; e                     |
| IP100257508       | Dihydropyrimidine-related protein 2                                                     | SSAEVIAQAR                 | c; d; e                  |
| IP100257508       | Dihydropyrimidine-related protein 2                                                     | THNSSELYNIFEGMECR          | d                        |
| IP100257508       | Dihydropyrimidine-related protein 2                                                     | TIEAHSR                    | c; d                     |
| IP100257508       | Dihydropyrimidine-related protein 2                                                     | TVTASSAK                   | c; d; h                  |
| IP100257508       | Dihydropyrimidine-related protein 2                                                     | VFNLYPK                    | c; d; e                  |
| IP100551024       | Dihydroxyacetone kinase                                                                 | VAPAEPQAPDSTAAGGSASK       | e                        |
| IP100645821       | Dimethylarginine dimethylaminohydrolase 2                                               | DFAVSTVPVSPSHLR            | c                        |
| IP100296196       | Dimethylglycine dehydrogenase                                                           | MLRPGAQLLR                 | a                        |
| IP100009148       | Diphosphoinositid polyphosphate phosphohydrolase 1                                      | WVYGGGMEPEEPEVAAVR         | d                        |
| IP100411901       | Disks, large homolog 5                                                                  | AMLSSTAVPEK                | a                        |
| IP100411901       | Disks, large homolog 5                                                                  | DYDALRK                    | a                        |
| IP100411901       | Disks, large homolog 5                                                                  | EALQEADVAKCR               | a                        |
| IP100411901       | Disks, large homolog 5                                                                  | EALQEADVAKCRR              | a                        |
| IP100411901       | Disks, large homolog 5                                                                  | GSIADGRLR                  | a                        |
| IP100411901       | Disks, large homolog 5                                                                  | IAGDANK                    | a                        |
| IP100411901       | Disks, large homolog 5                                                                  | YREERDAVYSEYK              | a                        |
| IP100219434       | Disks large-associated protein 3                                                        | EGYPLVPEPATDGSPPAPPTPGGAGR | e                        |
| IP100219434       | Disks large-associated protein 3                                                        | GFAGAGPFAFGTGTAPR          | d; e                     |
| IP100411461       | Disks large-associated protein 4 isoform                                                | QCSSCLVAYK                 | a                        |
| IP100304587       | Dispatched B                                                                            | DFLSPQTFDYQVPSLK           | a                        |
| IP100304587       | Dispatched B                                                                            | DGTRWKPVAVQHVVSVR          | a                        |
| IP100304587       | Dispatched B                                                                            | GQLNGK                     | a                        |
| IP100304587       | Dispatched B                                                                            | QAGFSPKTRAR                | a                        |
| IP100304587       | Dispatched B                                                                            | SHTSFGALCQR                | a                        |
| IP100034319       | Divalent cation tolerant protein CUTA                                                   | LLLLFR                     | a                        |
| IP100034319       | Divalent cation tolerant protein CUTA                                                   | TQSSLPALTFVIR              | a                        |
| IP100020294       | DJ756N5.1.1                                                                             | ADMAETQANK                 | a                        |
| IP100020294       | DJ756N5.1.1                                                                             | AVESLQASLDAETRAR           | a                        |
| IP100020294       | DJ756N5.1.1                                                                             | GRLQTSNGELSR               | a                        |
| IP100020294       | DJ756N5.1.1                                                                             | REAEELGR                   | a                        |
| IP100020294       | DJ756N5.1.1                                                                             | SAQAEELAAALR               | a                        |
| IP100020294       | DJ756N5.1.1                                                                             | VEELQRLADASTQR             | a                        |
| IP100413100       | DLNB07 protein                                                                          | ADGGPEAGELPSIGEATA         | a                        |
| IP100413100       | DLNB07 protein                                                                          | EQEMERLER                  | a                        |
| IP100413100       | DLNB07 protein                                                                          | LQSEAR                     | a                        |
| IP100413100       | DLNB07 protein                                                                          | LVALETGIQKER               | a                        |



| IPI Accession No. | Protein Description                                 | Peptide Sequence*    | Primary Source Dataset** |
|-------------------|-----------------------------------------------------|----------------------|--------------------------|
| IPI00293464       | DNA damage-binding protein 1                        | DLLFLITAK            | d                        |
| IPI00217669       | DNA ligase IV                                       | APNLINYNK            | a                        |
| IPI00217669       | DNA ligase IV                                       | ETMLAK               | a                        |
| IPI00217669       | DNA ligase IV                                       | FMHIMCPSTK           | a                        |
| IPI00002894       | DNA polymerase delta catalytic subunit              | ELNLAISRDSR          | a                        |
| IPI00002894       | DNA polymerase delta catalytic subunit              | GQQVKVVSQLLR         | a                        |
| IPI00002894       | DNA polymerase delta catalytic subunit              | VQSYEK               | a                        |
| IPI00002894       | DNA polymerase delta catalytic subunit              | VQTFPFLGRVAGLCSNIR   | a                        |
| IPI00218100       | DNA polymerase kappa                                | DKPIAVGSMISLTSNY     | a                        |
| IPI00218100       | DNA polymerase kappa                                | LSEHER               | a                        |
| IPI00218100       | DNA polymerase kappa                                | QPYLCEVK             | a                        |
| IPI00218100       | DNA polymerase kappa                                | TTLTASAGVR           | a                        |
| IPI00066511       | DNA polymerase theta                                | AVDEEEAVEERR         | a                        |
| IPI00066511       | DNA polymerase theta                                | DGFVQTLGR            | a                        |
| IPI00066511       | DNA polymerase theta                                | EGEETGSMIR           | a                        |
| IPI00066511       | DNA polymerase theta                                | KLCSIR               | a                        |
| IPI00066511       | DNA polymerase theta                                | KVVQTSQK             | a                        |
| IPI00066511       | DNA polymerase theta                                | SARKAVDEEEAVEER      | a                        |
| IPI00018281       | DNA repair and recombination protein                | LLTTGTIEEKIYRQISK    | a                        |
| IPI00018281       | DNA repair and recombination protein                | SLDQIK               | a                        |
| IPI00096899       | DNA replication factor Cdt1                         | QIFSQK               | a                        |
| IPI00184330       | DNA replication licensing factor MCM2               | GHSVREWVSMAGPR       | a                        |
| IPI00184330       | DNA replication licensing factor MCM2               | ITNHHIVR             | a                        |
| IPI00184330       | DNA replication licensing factor MCM2               | MAESSEFTMASSPAQR     | a                        |
| IPI00184330       | DNA replication licensing factor MCM2               | MNKFSHDLK            | a                        |
| IPI00184330       | DNA replication licensing factor MCM2               | QLVAEQVTYQR          | a                        |
| IPI00184330       | DNA replication licensing factor MCM2               | VAKMYSDLR            | a                        |
| IPI00184330       | DNA replication licensing factor MCM2               | YLSFRDRNELLFLK       | a                        |
| IPI00018350       | DNA replication licensing factor MCM5               | MREDDR               | a                        |
| IPI00018350       | DNA replication licensing factor MCM5               | RLPDGLTR             | a                        |
| IPI00018350       | DNA replication licensing factor MCM5               | VLQMLR               | a                        |
| IPI00215911       | DNA-(apurinic or apyrimidinic site) lyase           | QGFQELLQAVPLADFR     | d                        |
| IPI00098750       | DNA-binding protein                                 | AHGRPGGPR            | a                        |
| IPI00098750       | DNA-binding protein                                 | ANCERHLRK            | a                        |
| IPI00098750       | DNA-binding protein                                 | DPTSATATAPGR         | a                        |
| IPI00098750       | DNA-binding protein                                 | SPSKPPGNRIGR         | a                        |
| IPI00098750       | DNA-binding protein                                 | THRLLR               | a                        |
| IPI00329389       | DNA-binding protein TAXREB107                       | YYPTEDVPR            | d; e                     |
| IPI00031627       | DNA-directed RNA polymerase II largest              | NICEGGEEMDNK         | a                        |
| IPI00031627       | DNA-directed RNA polymerase II largest              | RMSVTEGGIK           | a                        |
| IPI00024163       | DNA-directed RNA polymerase III largest subunit     | ISGAK                | c                        |
| IPI00639806       | DnaJ (Hsp40) homolog, subfamily C, member 6         | ATGQPYEQVAK          | d                        |
| IPI00413140       | DNM1 protein                                        | KDITAAALAEK          | a                        |
| IPI00154755       | Down syndrome cell adhesion molecule 2              | AMRNITAVAGR          | a                        |
| IPI00154755       | Down syndrome cell adhesion molecule 2              | DTYSIPEHR            | a                        |
| IPI00154755       | Down syndrome cell adhesion molecule 2              | DVFSSERSFK           | a                        |
| IPI00029111       | DPYSL3 protein                                      | AVATGK               | d                        |
| IPI00029111       | DPYSL3 protein                                      | EWADGK               | d                        |
| IPI00029111       | DPYSL3 protein                                      | FIPCSPFSDVYVK        | d                        |
| IPI00029111       | DPYSL3 protein                                      | GMYDGPVFDLTTTPK      | c                        |
| IPI00029111       | DPYSL3 protein                                      | IMLEDGNLHVTVGAGR     | c; d                     |
| IPI00029111       | DPYSL3 protein                                      | ISVGSDDLVIWDPDAVK    | c                        |
| IPI00029111       | DPYSL3 protein                                      | MADLHAVPR            | c                        |
| IPI00029111       | DPYSL3 protein                                      | SAADLISQAR           | d                        |
| IPI00003406       | Drebrin                                             | LELLAAAYEEVIR        | d                        |
| IPI00295624       | drebrin 1 isoform b                                 | EQFWEQAK             | d; e                     |
| IPI00295624       | drebrin 1 isoform b                                 | SPSDSSTASTPVAEQIER   | d                        |
| IPI00295624       | drebrin 1 isoform b                                 | YVLINWVGEDVDPAR      | d; e                     |
| IPI00004970       | DRIM protein                                        | ALTKFPERVEPR         | a                        |
| IPI00004970       | DRIM protein                                        | HLDDINFDVR           | a                        |
| IPI00004970       | DRIM protein                                        | LPALNVTEK            | a                        |
| IPI00004970       | DRIM protein                                        | TTISAEK              | a                        |
| IPI00003783       | Dual specificity mitogen-activated protein kinase 2 | LEAFLTQK             | e                        |
| IPI00419454       | Dual specificity protein phosphatase 21             | MMISM                | d                        |
| IPI0055695        | Dynactin 1 isoform 1 variant (Fragment)             | MQEQQADLQR           | e                        |
| IPI00220503       | dynactin 2                                          | ENLATVEGNFASIDER     | d; e                     |
| IPI00220503       | dynactin 2                                          | ETPQQK               | c; d                     |
| IPI00220503       | dynactin 2                                          | VSALDLAVLDQVEAR      | d; e                     |
| IPI00220503       | dynactin 2                                          | WSPIALTPELVQR        | e                        |
| IPI00220503       | dynactin 2                                          | YADLPGLAR            | e                        |
| IPI00550852       | Dynactin subunit 4                                  | IQLVAVNYIPEVR        | e                        |
| IPI00550852       | Dynactin subunit 4                                  | LLQPDFQPVCAQLYPR     | e                        |
| IPI00657691       | Dynamitin 1                                         | TGLFTPDLAFAEYVK      | d                        |
| IPI00552861       | dynamitin 1 isoform 1                               | ALLQMVQQAFAVDFEK     | e                        |
| IPI00552861       | dynamitin 1 isoform 1                               | DFLPR                | e                        |
| IPI00552861       | dynamitin 1 isoform 1                               | DTLPGLR              | e                        |
| IPI00552861       | dynamitin 1 isoform 1                               | LEIEAETDR            | e                        |
| IPI00552861       | dynamitin 1 isoform 1                               | RIEGSGDQIDTYELSGGAR  | e                        |
| IPI00552861       | dynamitin 1 isoform 1                               | TGLFTPDMAFETIVK      | e                        |
| IPI00514850       | dynamitin 1 isoform 2                               | APPGVPR              | d                        |
| IPI00514850       | dynamitin 1 isoform 2                               | DITAAALAEK           | d                        |
| IPI00514850       | dynamitin 1 isoform 2                               | EISYAIK              | d                        |
| IPI00514850       | dynamitin 1 isoform 2                               | ENCLLAVSPANSDLANSALK | e                        |
| IPI00514850       | dynamitin 1 isoform 2                               | GISPVPINLR           | d; e                     |
| IPI00514850       | dynamitin 1 isoform 2                               | GMEDLPLVNR           | d                        |
| IPI00514850       | dynamitin 1 isoform 2                               | GYGVVNR              | d; e                     |
| IPI00514850       | dynamitin 1 isoform 2                               | IEGSGDQIDTYELSGGAR   | d; e                     |
| IPI00514850       | dynamitin 1 isoform 2                               | ITISDP               | e                        |
| IPI00514850       | dynamitin 1 isoform 2                               | LDLMDEGTDAR          | d; e                     |
| IPI00514850       | dynamitin 1 isoform 2                               | LQSLLSIEK            | d                        |
| IPI00514850       | dynamitin 1 isoform 2                               | MEFDEK               | d                        |
| IPI00514850       | dynamitin 1 isoform 2                               | SPTSSPTQR            | d                        |
| IPI00514850       | dynamitin 1 isoform 2                               | SSVLENFVGR           | d; e                     |
| IPI00514850       | dynamitin 1 isoform 2                               | TSGNQDEILVIR         | d                        |
| IPI00514850       | dynamitin 1 isoform 2                               | VLNQQLTSHIR          | d                        |
| IPI00457139       | Dynamitin 1 isoform 2 variant                       | EVDPOGQR             | c; d                     |
| IPI00457139       | Dynamitin 1 isoform 2 variant                       | FFPELVK              | d                        |

| IPI Accession No. | Protein Description                                                   | Peptide Sequence*      | Primary Source Dataset** |
|-------------------|-----------------------------------------------------------------------|------------------------|--------------------------|
| IP100457139       | Dynamain 1 isoform 2 variant                                          | HIFALFNTQQR            | c; d; e                  |
| IP100457139       | Dynamain 1 isoform 2 variant                                          | YVVGQPPDIEFQIR         | c; d                     |
| IP100413140       | Dynamain-1                                                            | DMLMQFVTK              | e                        |
| IP100413140       | Dynamain-1                                                            | LQQYPR                 | e                        |
| IP100413140       | Dynamain-1                                                            | YMLSVNLIK              | e                        |
| IP100006721       | Dynamain-like 120 kDa protein.                                        | HSSGIRGSLPLQK          | a                        |
| IP100006721       | Dynamain-like 120 kDa protein.                                        | NLESRGVEYDPSLIK        | a                        |
| IP100006721       | Dynamain-like 120 kDa protein.                                        | SISDK                  | a                        |
| IP100019329       | Dynein light chain 1, cytoplasmic                                     | NADMSEMQQDSVECATQALEK  | e                        |
| IP100062037       | Dynein light chain 2, cytoplasmic                                     | DIAAYIK                | d                        |
| IP100062037       | Dynein light chain 2, cytoplasmic                                     | NADMSEDMQQDAVDCATQAMEK | e                        |
| IP100062037       | Dynein light chain 2, cytoplasmic                                     | YNPTWHCVIGR            | c; e                     |
| IP100176312       | Dynein, axonemal, heavy polypeptide 17                                | AVLDDILEK              | a                        |
| IP100176312       | Dynein, axonemal, heavy polypeptide 17                                | ELEDSLAR               | a                        |
| IP100176312       | Dynein, axonemal, heavy polypeptide 17                                | MSTENATILGNTER         | a                        |
| IP100176312       | Dynein, axonemal, heavy polypeptide 17                                | NREDMTAPPR             | a                        |
| IP100176312       | Dynein, axonemal, heavy polypeptide 17                                | WDTQTGVIAEAR           | a                        |
| IP100020210       | Dysferlin                                                             | DLAAMDK                | a                        |
| IP100020210       | Dysferlin                                                             | MEPLEK                 | a                        |
| IP100020210       | Dysferlin                                                             | MFELTCTLPLEK           | a                        |
| IP100020210       | Dysferlin                                                             | TGPAAVFALEGALGGVM      | a                        |
| IP100166250       | dyslexia susceptibility 1 candidate 1 isoform b                       | IEDMK                  | d                        |
| IP100329536       | Early endosome antigen 1                                              | NQIGSQNK               | d                        |
| IP100478090       | Early hematopoietic zinc finger                                       | DGSGSGSR               | d                        |
| IP100140420       | EBNA-2 co-activator                                                   | GEFCIAK                | a                        |
| IP100216448       | ECT2 protein                                                          | ETLAQLSR               | a                        |
| IP100216448       | ECT2 protein                                                          | EVMTHINEDK             | a                        |
| IP100216448       | ECT2 protein                                                          | EVMTHINEDKRK           | a                        |
| IP100216448       | ECT2 protein                                                          | QEELTK                 | a                        |
| IP100216448       | ECT2 protein                                                          | TNMEEMTEMGGK           | a                        |
| IP100184311       | Ectonucleotide                                                        | GGEGGRAPR              | a                        |
| IP100184311       | Ectonucleotide                                                        | KYAEER                 | a                        |
| IP100025447       | EEF1A1 protein                                                        | IGGIGTVPVGR            | c; d; e                  |
| IP100025447       | EEF1A1 protein                                                        | LPLQDVYK               | c; d; e                  |
| IP100025447       | EEF1A1 protein                                                        | QTVAVGVK               | c; d; e                  |
| IP100328885       | EEF1A2 binding protein                                                | EPPGHLGSR              | a                        |
| IP100328885       | EEF1A2 binding protein                                                | TVECYVVER              | a                        |
| IP100646501       | EELP6309                                                              | EYFDYR                 | d                        |
| IP100171206       | EF hand calcium binding protein 1                                     | DYQEQSNLEQFVTR         | d                        |
| IP100552365       | EF hand domain containing 2                                           | ADLNQGIQEPQSPSR        | d                        |
| IP100552365       | EF hand domain containing 2                                           | EFLIFR                 | d; e                     |
| IP100552365       | EF hand domain containing 2                                           | SFFEAK                 | d                        |
| IP100552365       | EF hand domain containing 2                                           | VFNPTFEK               | d                        |
| IP100024426       | Eferin                                                                | EATQELIEDLR            | a                        |
| IP100024426       | Eferin                                                                | WSAGPAPGLEGGPR         | a                        |
| IP100641920       | EF-hand calcium binding protein 2                                     | ESLAPAAPADPGPASPR      | c; d                     |
| IP100060181       | EF-hand domain-containing protein 2                                   | DGFIDLMEIK             | e                        |
| IP100017184       | EH-domain-containing protein 1                                        | ILLFDAAK               | d                        |
| IP100005578       | EH-domain-containing protein 4                                        | YLLEQDFQGMGR           | d; e                     |
| IP100386639       | Elastic titin                                                         | VPENPQVPEK             | a                        |
| IP100383807       | Electrogenic Na+ bicarbonate cotransporter (Fragment)                 | FLFILLGPK              | d                        |
| IP100010810       | Electron transfer flavoprotein alpha-subunit, mitochondrial precursor | VLVAQHDDVYK            | d                        |
| IP100014424       | Elongation factor 1-alpha 2                                           | EAAEMGK                | c; d                     |
| IP100014424       | Elongation factor 1-alpha 2                                           | YYTHDAPGHR             | d                        |
| IP100186290       | Elongation factor 2                                                   | ALLELQLEPEELYQTFQR     | d                        |
| IP100186290       | Elongation factor 2                                                   | GGGQHTPAR              | d                        |
| IP100011689       | Elongation factor 2 kinase                                            | ICESMGLAPFDLSPR        | a                        |
| IP100011689       | Elongation factor 2 kinase                                            | YIEPDRDVFYEDVYR        | a                        |
| IP100177743       | Endocrine regulator                                                   | DKEDGK                 | a                        |
| IP100177743       | Endocrine regulator                                                   | QKVIIEER               | a                        |
| IP100177743       | Endocrine regulator                                                   | RGSPSPPR               | a                        |
| IP100177743       | Endocrine regulator                                                   | SLRITVGNDFCVSTPER      | a                        |
| IP100001952       | Endonuclease domain-containing 1 protein precursor                    | QALNTDYLDSYQR          | e                        |
| IP100024911       | Endoplasmic reticulum protein ERp29 precursor                         | FDQTPYGEK              | d                        |
| IP100024911       | Endoplasmic reticulum protein ERp29 precursor                         | SLNLTAFQK              | c                        |
| IP100027230       | Endoplasmin precursor                                                 | AQAVQTGK               | c; e                     |
| IP100027230       | Endoplasmin precursor                                                 | DISTNYYASQK            | c                        |
| IP100027230       | Endoplasmin precursor                                                 | FAFQAEVNR              | d; e                     |
| IP100027230       | Endoplasmin precursor                                                 | GLFDEYGR               | d                        |
| IP100027230       | Endoplasmin precursor                                                 | GVVSDDLLPLNYSR         | d; e                     |
| IP100027230       | Endoplasmin precursor                                                 | LGVIDHSNR              | d                        |
| IP100027230       | Endoplasmin precursor                                                 | SILFVPTSAPR            | d                        |
| IP100027230       | Endoplasmin precursor                                                 | TBDEVVQR               | d                        |
| IP100027230       | Endoplasmin precursor                                                 | TETVEEPMEEEAAK         | d                        |
| IP100032405       | Endothelin B receptor-like protein-2                                  | DGGTPDSGQELR           | a                        |
| IP100032405       | Endothelin B receptor-like protein-2                                  | GRERAVASTEYK           | a                        |
| IP100032405       | Endothelin B receptor-like protein-2                                  | IIEIQSK                | a                        |
| IP100032405       | Endothelin B receptor-like protein-2                                  | QQQELLEK               | a                        |
| IP100412464       | Endothelin receptor type B                                            | QSLEEK                 | c                        |
| IP100029631       | Enhancer of rudimentary homolog                                       | ADTQTPQYK              | d                        |
| IP100328587       | ENO1P protein                                                         | LAMQEFMVLPGAANFR       | d                        |
| IP100465248       | enolase 1                                                             | AAVPSGASTGIYEALELR     | c; d; e; f; g            |
| IP100465248       | enolase 1                                                             | AGAVEK                 | c                        |
| IP100465248       | enolase 1                                                             | AGYTDK                 | d                        |
| IP100465248       | enolase 1                                                             | AVEHINK                | c; d                     |
| IP100465248       | enolase 1                                                             | AVNEK                  | c; d                     |
| IP100465248       | enolase 1                                                             | DATNVSDGEGFAPNLENK     | c; d; g                  |
| IP100465248       | enolase 1                                                             | DYPVSIEDPFQDDWGAQK     | d; e                     |
| IP100465248       | enolase 1                                                             | EGLELLK                | c; d                     |
| IP100465248       | enolase 1                                                             | EIFDSR                 | c; d; e                  |
| IP100465248       | enolase 1                                                             | FTASAGIQVGGDLLVTNPK    | d                        |
| IP100465248       | enolase 1                                                             | GNPTVEVDLTSK           | d                        |
| IP100465248       | enolase 1                                                             | GVPLYR                 | d                        |
| IP100465248       | enolase 1                                                             | IIEELGSK               | c; d                     |
| IP100465248       | enolase 1                                                             | JGAEVYHNLK             | d                        |
| IP100465248       | enolase 1                                                             | KLVNTEQEK              | c; d                     |
| IP100465248       | enolase 1                                                             | LAMQEFMVLPGAANFR       | c; d; e                  |

| IPI Accession No. | Protein Description                                                                  | Peptide Sequence*         | Primary Source Dataset** |
|-------------------|--------------------------------------------------------------------------------------|---------------------------|--------------------------|
| IPI00465248       | enolase 1                                                                            | LAQANGWGMVSHR             | d                        |
| IPI00465248       | enolase 1                                                                            | LMIEMDGTENK               | d                        |
| IPI00465248       | enolase 1                                                                            | LNVTQEKK                  | d                        |
| IPI00465248       | enolase 1                                                                            | SCNCLLLK                  | c                        |
| IPI00465248       | enolase 1                                                                            | SGKYDLDFK                 | c; d                     |
| IPI00465248       | enolase 1                                                                            | SPDDPSR                   | c; d                     |
| IPI00465248       | enolase 1                                                                            | TAIGK                     | d                        |
| IPI00465248       | enolase 1                                                                            | TIAPALYSK                 | c; d                     |
| IPI00465248       | enolase 1                                                                            | VVICMDVAASEFFR            | d; g                     |
| IPI00465248       | enolase 1                                                                            | YDLDFK                    | c                        |
| IPI00465248       | enolase 1                                                                            | YISPDQLADLYK              | c; d; e                  |
| IPI00465248       | enolase 1                                                                            | YNQLLR                    | d; e                     |
| IPI00024993       | Enoyl-CoA hydratase, mitochondrial precursor                                         | AFAAAGADIK                | c; d; e                  |
| IPI00024993       | Enoyl-CoA hydratase, mitochondrial precursor                                         | AQFAQPEILJGTPGAGGTQR      | d; e                     |
| IPI00024993       | Enoyl-CoA hydratase, mitochondrial precursor                                         | EGMTAFVEK                 | c                        |
| IPI00024993       | Enoyl-CoA hydratase, mitochondrial precursor                                         | EMQNSLFQDCVYSK            | c                        |
| IPI00024993       | Enoyl-CoA hydratase, mitochondrial precursor                                         | NNTVGLIQLNRPK             | c                        |
| IPI00024993       | Enoyl-CoA hydratase, mitochondrial precursor                                         | HLQQDWSLMDADPAGVR         | a                        |
| IPI00023711       | Envoplakin                                                                           | RQLELEVQQLR               | a                        |
| IPI00023711       | Envoplakin                                                                           | DEDGEGGQR                 | d; e                     |
| IPI00644651       | EPB41L1 protein                                                                      | DYSEADGLSER               | e                        |
| IPI00644651       | EPB41L1 protein                                                                      | ELKPEQETTPR               | d                        |
| IPI00644651       | EPB41L1 protein                                                                      | FAPNQTR                   | e                        |
| IPI00644651       | EPB41L1 protein                                                                      | GAAAMIPGPQVATEIR          | e                        |
| IPI00644651       | EPB41L1 protein                                                                      | IEPEAVLQTR                | d; e                     |
| IPI00644651       | EPB41L1 protein                                                                      | SEAEEGEVR                 | e                        |
| IPI0008318        | Ephrin type-A receptor 4 precursor                                                   | TAAGYGFDFSEPLEVTNTVPSR    | e                        |
| IPI0008318        | Ephrin type-A receptor 4 precursor                                                   | DCNSLPGVMGTCK             | e                        |
| IPI00292134       | Epidermal growth factor receptor substrate 15                                        | LQAQK                     | d                        |
| IPI0009896        | Epoxide hydrolase 1                                                                  | GGHFAAFEEPELLAQDIR        | d                        |
| IPI00556528       | Epsilon isoform of regulatory subunit B56, protein phosphatase 2A variant (Fragment) | STLNELVDYITSR             | d                        |
| IPI00385799       | ervi-like growth factor                                                              | DAAASASTPAQAPTSVSDPAEDASR | c; e                     |
| IPI00183424       | Erythroid differentiation-1 factor 1                                                 | LASMYHSCLR                | a                        |
| IPI00183424       | Erythroid differentiation-1 factor 1                                                 | YPAVSLRLR                 | a                        |
| IPI00411706       | Esterase D                                                                           | AFSGYLGTQSK               | d                        |
| IPI00411706       | Esterase D                                                                           | AYDATHLVK                 | c; d                     |
| IPI00411706       | Esterase D                                                                           | QISSNK                    | c; d                     |
| IPI00411706       | Esterase D                                                                           | VFEHDSVELNCK              | d                        |
| IPI00015285       | Ethanolamine-phosphate cytidylyltransferase                                          | GAAGGAEQPGPGR             | c; d; e                  |
| IPI00472724       | Eukaryotic translation elongation factor 1 alpha-like 3                              | YVVTIDAPGHR               | d                        |
| IPI00219678       | Eukaryotic translation initiation factor 2 subunit 1                                 | VVTDTEDELAR               | d                        |
| IPI00029012       | Eukaryotic translation initiation factor 3                                           | AEFRKLDNLR                | a                        |
| IPI00029012       | Eukaryotic translation initiation factor 3                                           | ANEFLEVGKK                | a                        |
| IPI00029012       | Eukaryotic translation initiation factor 3                                           | DLFVMR                    | a                        |
| IPI00029012       | Eukaryotic translation initiation factor 3                                           | EENDKDPERER               | a                        |
| IPI00029012       | Eukaryotic translation initiation factor 3                                           | GAEDDRGPWR                | a                        |
| IPI00029012       | Eukaryotic translation initiation factor 3                                           | QVEQLEK                   | a                        |
| IPI00029012       | Eukaryotic translation initiation factor 3                                           | TDIARLLMDIGHVEKQR         | a                        |
| IPI00386534       | Eukaryotic translation initiation factor 4                                           | FSALQAVPTSDNRR            | a                        |
| IPI00386534       | Eukaryotic translation initiation factor 4                                           | GGGGELPRGPAGLGPR          | a                        |
| IPI00439415       | eukaryotic translation initiation factor 4B                                          | SAPEFK                    | c; d                     |
| IPI00439415       | eukaryotic translation initiation factor 4B                                          | SQSSDTEQSPSTGGGK          | d; h                     |
| IPI00439415       | eukaryotic translation initiation factor 4B                                          | VAPAQPSSEEGPGR            | c; e                     |
| IPI00022648       | Eukaryotic translation initiation factor 5                                           | VNLFDFVK                  | d                        |
| IPI00411704       | Eukaryotic translation initiation factor 5A-1                                        | NDFQLIGDQGYLSLQDSGEVR     | d                        |
| IPI00300020       | Excitatory amino acid transporter 2                                                  | CLEENLGDK                 | d                        |
| IPI00300020       | Excitatory amino acid transporter 2                                                  | NDEVNSLDAFLDLIR           | d; e                     |
| IPI00300020       | Excitatory amino acid transporter 2                                                  | SADCSVEEPPWK              | d; e                     |
| IPI00300020       | Excitatory amino acid transporter 2                                                  | SADCSVEEPPWR              | b; c; d; e               |
| IPI00300020       | Excitatory amino acid transporter 2                                                  | SELDTIDSQHR               | d                        |
| IPI00300020       | Excitatory amino acid transporter 2                                                  | TQSYDDMK                  | d; e                     |
| IPI00219173       | Exonuclease 1, isoform b                                                             | EKVSSEARECFTR             | a                        |
| IPI00219173       | Exonuclease 1, isoform b                                                             | ENNLHSEYGDQEGK            | a                        |
| IPI00219173       | Exonuclease 1, isoform b                                                             | GAIACAELAK                | a                        |
| IPI00168769       | Exophilin 5                                                                          | BHISCTEK                  | a                        |
| IPI00006969       | Extracellular matrix protein 1                                                       | DILTIDISR                 | a                        |
| IPI00003351       | Extracellular matrix protein 1 precursor                                             | DILTIDIGR                 | a                        |
| IPI00003351       | Extracellular matrix protein 1 precursor                                             | LTINDLCGPR                | a                        |
| IPI00304111       | Extracellular signal-related kinase 1c                                               | FQPGVLEAP                 | c; d; e                  |
| IPI00746388       | Ezrin                                                                                | AQEEAER                   | c; d                     |
| IPI00746388       | Ezrin                                                                                | ELSEQIQR                  | d                        |
| IPI00746388       | Ezrin                                                                                | GFPTWLK                   | d                        |
| IPI00746388       | Ezrin                                                                                | IDEFEAL                   | c                        |
| IPI00746388       | Ezrin                                                                                | IGFPWSEIR                 | c; e                     |
| IPI00746388       | Ezrin                                                                                | LQDYEEK                   | d                        |
| IPI00746388       | Ezrin                                                                                | QLFDQVVK                  | c; d                     |
| IPI00746388       | Ezrin                                                                                | SQEQLAAELAEYTAK           | c                        |
| IPI00003527       | Ezrin-radixin-moesin-binding phosphoprotein 50                                       | AQEAQGAEPAAAEVQAGNENEP    | d                        |
| IPI00003527       | Ezrin-radixin-moesin-binding phosphoprotein 50                                       | SVDPSPAEASGLR             | c; d; e                  |
| IPI00005969       | F-actin capping protein alpha-1 subunit                                              | IDWNK                     | c                        |
| IPI00382606       | Factor VII active site mutant immunconjugate                                         | ALPAPIEK                  | c; d; e                  |
| IPI00413170       | FAM98C protein                                                                       | CLLLK                     | c                        |
| IPI00023608       | Fanconi anemia group C protein                                                       | VASLSR                    | c                        |
| IPI00298363       | Far upstream element binding protein 2                                               | LFHIR                     | a                        |
| IPI00382869       | Farnesyl pyrophosphate synthetase like-4 protein (Fragment)                          | ELVDPR                    | d                        |
| IPI00382869       | Farnesyl pyrophosphate synthetase like-4 protein (Fragment)                          | ENVGQK                    | c                        |
| IPI00382869       | Farnesyl pyrophosphate synthetase like-4 protein (Fragment)                          | RLTVAAFR                  | d                        |
| IPI00020944       | Farnesyl-diphosphate farnesyltransferase                                             | GQAVTLMMDATNMPAYK         | a                        |
| IPI00020944       | Farnesyl-diphosphate farnesyltransferase                                             | KGQAVTLMMDATNMPAV         | a                        |
| IPI00020944       | Farnesyl-diphosphate farnesyltransferase                                             | QVLEDFITSLSEFRNLAE        | a                        |
| IPI00017569       | Fas apoptotic inhibitory molecule 2                                                  | APGTEGQQQVHGEK            | d; e                     |
| IPI00419327       | Fat-like cadherin FATJ protein                                                       | GAMLEPGVNSLEVKFR          | a                        |
| IPI00419327       | Fat-like cadherin FATJ protein                                                       | NGTATVLSVDRIYNR           | a                        |
| IPI00419327       | Fat-like cadherin FATJ protein                                                       | SENGVLIHQSSNYTV           | a                        |
| IPI00419327       | Fat-like cadherin FATJ protein                                                       | TILQVARDDDR               | a                        |
| IPI00419327       | Fat-like cadherin FATJ protein                                                       | VYFTSDAGIAGK              | a                        |
| IPI00645907       | fatty acid synthase                                                                  | DNLEFLAGIGR               | d                        |

| IPI Accession No. | Protein Description                                       | Peptide Sequence* | Primary Source Dataset** |
|-------------------|-----------------------------------------------------------|-------------------|--------------------------|
| IP100645907       | fatty acid synthase                                       | LQVVDPQPLVPR      | c                        |
| IP100026781       | Fatty acid synthase                                       | MEEVVIAGMFGK      | a                        |
| IP100026781       | Fatty acid synthase                                       | SEGVAVLLTK        | a                        |
| IP100021089       | Fatty acid transport protein                              | DALLHCLTNSR       | a                        |
| IP100215747       | Fatty acid-binding protein, brain                         | ETNFVR            | d                        |
| IP100215747       | Fatty acid-binding protein, brain                         | LTNSQFDEYMK       | d                        |
| IP100219684       | Fatty acid-binding protein, heart                         | LGVEFDETTADDR     | d                        |
| IP100219684       | Fatty acid-binding protein, heart                         | LVDSK             | c                        |
| IP100219684       | Fatty acid-binding protein, heart                         | LVHLQK            | d                        |
| IP100219684       | Fatty acid-binding protein, heart                         | NFDDYMK           | d                        |
| IP100219684       | Fatty acid-binding protein, heart                         | QVAMTKPTTIEK      | c                        |
| IP100219684       | Fatty acid-binding protein, heart                         | WDGQETTLVR        | c                        |
| IP100181266       | FBF1 protein                                              | DMEEER            | a                        |
| IP100181266       | FBF1 protein                                              | LEKERINATALR      | a                        |
| IP100181266       | FBF1 protein                                              | SRQEVIGKMEAR      | a                        |
| IP100007295       | F-box only protein 10                                     | IIMLR             | a                        |
| IP100552091       | F-box only protein 10                                     | QSGVK             | c                        |
| IP100007295       | F-box only protein 10                                     | SNPLQGNPR         | a                        |
| IP100217373       | F-box only protein 16                                     | HPTDIIR           | a                        |
| IP100217373       | F-box only protein 16                                     | RALLGK            | a                        |
| IP100217373       | F-box only protein 16                                     | VFEERR            | a                        |
| IP100409721       | F-box only protein 18                                     | TNANVFDEAVR       | a                        |
| IP100409721       | F-box only protein 18                                     | WDGVSKKAPR        | a                        |
| IP100409721       | F-box only protein 18                                     | YNIRIPELVQRIEK    | a                        |
| IP100007087       | F-box only protein 2                                      | YFASSEWCR         | d; e                     |
| IP100291868       | F-box only protein 41                                     | EIEIPLGELFAR      | e                        |
| IP10166009        | F-box_LRR-repeat protein 11                               | ENNSPGKK          | a                        |
| IP10166009        | F-box_LRR-repeat protein 11                               | GMVTRSSPGAQPSDHS  | a                        |
| IP10166009        | F-box_LRR-repeat protein 11                               | MPDPFTVNDVK       | a                        |
| IP10166009        | F-box_LRR-repeat protein 11                               | RELCECMR          | a                        |
| IP100554521       | Ferritin heavy chain                                      | AIKELGDHVTNLR     | d                        |
| IP100554521       | Ferritin heavy chain                                      | EHAEK             | c                        |
| IP100554521       | Ferritin heavy chain                                      | ELGDHVTNLR        | c; f; g                  |
| IP100554521       | Ferritin heavy chain                                      | IFLQDIK           | c; d; e                  |
| IP100554521       | Ferritin heavy chain                                      | LQNQR             | c; d                     |
| IP100554521       | Ferritin heavy chain                                      | QNYHQDSEAAINR     | c; d; f; g               |
| IP100554521       | Ferritin heavy chain                                      | YFLHQSHIEER       | c                        |
| IP100375676       | Ferritin light polypeptide variant                        | ALFQDIK           | c; d                     |
| IP100375676       | Ferritin light polypeptide variant                        | ELAEK             | c                        |
| IP100375676       | Ferritin light polypeptide variant                        | KPADEWVK          | c                        |
| IP100375676       | Ferritin light polypeptide variant                        | LNQALLDLHALGSAR   | c                        |
| IP100375676       | Ferritin light polypeptide variant                        | TPDAMK            | c                        |
| IP100254408       | Fetal Alzheimer antigen isoForm 1                         | LFKGEKEVLVNSQGEIS | a                        |
| IP100254408       | Fetal Alzheimer antigen isoForm 1                         | NLSESPVTK         | a                        |
| IP100254408       | Fetal Alzheimer antigen isoForm 1                         | RRDVGPGYR         | a                        |
| IP100254408       | Fetal Alzheimer antigen isoForm 1                         | VQSPSQTR          | a                        |
| IP100001730       | FH1/FH2 domains-containing protein                        | MAGGEDRGDGEVPSVV  | a                        |
| IP100001730       | FH1/FH2 domains-containing protein                        | QIFQEDK           | a                        |
| IP100001730       | FH1/FH2 domains-containing protein                        | SGLGDDLQALGLSK    | a                        |
| IP100001730       | FH1/FH2 domains-containing protein                        | TQLSVR            | a                        |
| IP100001730       | FH1/FH2 domains-containing protein                        | TQLSVRVNALEK      | a                        |
| IP100022021       | Fibronectin, type III-like fold domain containing protein | ISWAMEDSLER       | e                        |
| IP100759644       | FK506 binding protein 2                                   | GVQVETISPGDGR     | c; d; e                  |
| IP100002535       | FK506-binding protein 2 precursor                         | GWDDQLGGMCEGEK    | d                        |
| IP100024157       | FK506-binding protein 3                                   | AWTVEQLR          | e                        |
| IP100219005       | FK506-binding protein 4                                   | AWDIAIATMK        | d                        |
| IP100219005       | FK506-binding protein 4                                   | FEIGEGENLDLPGYLER | e                        |
| IP100219005       | FK506-binding protein 4                                   | GEDLTEEDGGIHR     | d                        |
| IP100031410       | FKBP12-rapamycin complex-associated                       | DLMEAQEWCRK       | a                        |
| IP100031410       | FKBP12-rapamycin complex-associated                       | LYFGERNVK         | a                        |
| IP100031410       | FKBP12-rapamycin complex-associated                       | MLGHLVSNAPR       | a                        |
| IP100031410       | FKBP12-rapamycin complex-associated                       | REIHRQIWSNR       | a                        |
| IP100103925       | FKSG27                                                    | AGSGEGPGK         | a                        |
| IP100100798       | FLASH homolog RIP25                                       | DASDK             | c                        |
| IP100100798       | FLASH homolog RIP25                                       | GWEDCK            | a                        |
| IP100100798       | FLASH homolog RIP25                                       | HSQFNRGTER        | a                        |
| IP100100798       | FLASH homolog RIP25                                       | KPTQDSCENTEAHQK   | a                        |
| IP100100798       | FLASH homolog RIP25                                       | NISALIKTAR        | a                        |
| IP100100798       | FLASH homolog RIP25                                       | SLVGCK            | a                        |
| IP100219910       | Flavin reductase                                          | TVAGQDAVIVLLGTR   | d                        |
| IP100291811       | FLJ00120 protein                                          | DEAQTQYSQSLIEKDK  | a                        |
| IP100291811       | FLJ00120 protein                                          | IEMVRR            | a                        |
| IP100291811       | FLJ00120 protein                                          | NMAVMR            | a                        |
| IP100332643       | FLJ00173 protein                                          | CVVIGLQSTGEARTR   | a                        |
| IP100332643       | FLJ00173 protein                                          | DLSKYNFENK        | a                        |
| IP100332643       | FLJ00173 protein                                          | GLPAAPALLFPGAAPGR | a                        |
| IP100332643       | FLJ00173 protein                                          | KQVGKIPEGCVR      | a                        |
| IP100332643       | FLJ00173 protein                                          | QDLLDKVR          | a                        |
| IP100332643       | FLJ00173 protein                                          | RVHMTLELPWSADR    | a                        |
| IP100332643       | FLJ00173 protein                                          | VAEMTGRKGR        | a                        |
| IP100152758       | FLJ00198 protein                                          | HQLSVPRHLIQTHRR   | a                        |
| IP100441978       | FLJ00267 protein                                          | ADSMK             | a                        |
| IP100441978       | FLJ00267 protein                                          | EPQVPDLSSQR       | a                        |
| IP100441978       | FLJ00267 protein                                          | GEAGGSQETKVR      | a                        |
| IP100418544       | FLJ00268 protein                                          | AGLPGPR           | a                        |
| IP100418544       | FLJ00268 protein                                          | EGQSRCDGR         | a                        |
| IP100418544       | FLJ00268 protein                                          | GGRVPPAGLWSGRR    | a                        |
| IP100418544       | FLJ00268 protein                                          | RTRACAAGK         | a                        |
| IP100418544       | FLJ00268 protein                                          | RWLGPGGRGGR       | a                        |
| IP100166578       | FLJ00269 protein                                          | EGTYAK            | a                        |
| IP100166578       | FLJ00269 protein                                          | FAEKAVDRR         | a                        |
| IP100166578       | FLJ00269 protein                                          | IRIGEAK           | a                        |
| IP100166578       | FLJ00269 protein                                          | KQPGSTPNLQK       | a                        |
| IP100168740       | FLJ00369 protein                                          | ADTSPAEP          | a                        |
| IP100168740       | FLJ00369 protein                                          | SAAVVNAIGLYMR     | a                        |
| IP100168740       | FLJ00369 protein                                          | VIGMDVTEPGSGSR    | a                        |
| IP100442341       | FLJ00395 protein                                          | KFDGARTIQK        | a                        |

| IPI Accession No. | Protein Description                                                                      | Peptide Sequence*         | Primary Source Dataset** |
|-------------------|------------------------------------------------------------------------------------------|---------------------------|--------------------------|
| IP100442341       | FL100395 protein                                                                         | SSQAPTRAAPAPPR            | a                        |
| IP100386174       | FL100398 protein                                                                         | GFNEEIK                   | a                        |
| IP100386174       | FL100398 protein                                                                         | WIPGQAGAGEGAEER           | a                        |
| IP100386174       | FL100398 protein                                                                         | YVFEQDMK                  | a                        |
| IP100329668       | FL100412 protein                                                                         | AGPGQLFWAER               | a                        |
| IP100329668       | FL100412 protein                                                                         | ALTEQQEQLR                | a                        |
| IP100329668       | FL100412 protein                                                                         | TQSVVPRPAR                | a                        |
| IP100329668       | FL100412 protein                                                                         | VIQLANR                   | a                        |
| IP100329668       | FL100412 protein                                                                         | VLSAPPKESR                | a                        |
| IP100419471       | FL110900 protein                                                                         | EALIPR                    | a                        |
| IP100440241       | FL112649 protein                                                                         | ADGAAAGAGGSPSLR           | a                        |
| IP100440241       | FL112649 protein                                                                         | MADGAAAGAGGSPSLR          | a                        |
| IP100410602       | FL113273 protein                                                                         | ELSLIRAK                  | a                        |
| IP100448515       | FL121908 protein                                                                         | IKSYDYAWAKLDVDR           | a                        |
| IP100645577       | FL122386 protein                                                                         | LMDAVMLQLTR               | e                        |
| IP100514650       | FL125477 protein                                                                         | DPAGEPAGGEEVPAPADR        | e                        |
| IP100384512       | FL135220 protein                                                                         | MSLEAAVR                  | a                        |
| IP100027438       | Flotillin 1                                                                              | AQQVAVQEQLAR              | e                        |
| IP100027438       | Flotillin 1                                                                              | VFVLPICQIQIR              | e                        |
| IP100027438       | Flotillin 1                                                                              | VQVQVVER                  | d; e                     |
| IP100029625       | Flotillin 2                                                                              | DADIGVAEER                | e                        |
| IP100029625       | Flotillin 2                                                                              | IQQIAGEK                  | e                        |
| IP100293089       | FMN1.3 protein                                                                           | TTPPSVFPVFR               | d                        |
| IP100292380       | FOAP-2                                                                                   | LQFFYVVK                  | a                        |
| IP100292380       | FOAP-2                                                                                   | RRPFLSGDEDPKASTLR         | a                        |
| IP100292380       | FOAP-2                                                                                   | VCISVNLKACR               | a                        |
| IP100030997       | Forkhead box protein G1C (Fragment)                                                      | QSPEK                     | e                        |
| IP100021176       | Formin 2                                                                                 | DSPSSTAFFPPEAGPGEEAAGAPVR | c                        |
| IP100021176       | Formin 2                                                                                 | SEGQATVIQQLEQTHEDL        | a                        |
| IP100021176       | Formin 2                                                                                 | VPSMGPPSKPPDEHR           | a                        |
| IP100026957       | Formin binding protein 21                                                                | TVTSLGVMDGVAPYFK          | a                        |
| IP100464956       | Formin-like 2 isoForm A                                                                  | FMMQFSK                   | a                        |
| IP100464956       | Formin-like 2 isoForm A                                                                  | LMQK                      | a                        |
| IP100464956       | Formin-like 2 isoForm A                                                                  | REYTMHDHNTLLK             | a                        |
| IP100464956       | Formin-like 2 isoForm A                                                                  | RVQSTQVLR                 | a                        |
| IP100464956       | Formin-like 2 isoForm A                                                                  | TVPFTAR                   | a                        |
| IP100011593       | Fos-related antigen 2                                                                    | DEQLSPEEEER               | a                        |
| IP100011593       | Fos-related antigen 2                                                                    | LAAAKCR                   | a                        |
| IP100011593       | Fos-related antigen 2                                                                    | SLQKELAEELQK              | a                        |
| IP100398012       | Fragile site-associated protein                                                          | DDDKTR                    | c                        |
| IP100412298       | FRAP-related protein                                                                     | EPILALR                   | a                        |
| IP100412298       | FRAP-related protein                                                                     | GVELCFPENETPEEGK          | a                        |
| IP100412298       | FRAP-related protein                                                                     | LTHNMVNGMPMGTEG           | a                        |
| IP100412298       | FRAP-related protein                                                                     | NNELEK                    | a                        |
| IP100412298       | FRAP-related protein                                                                     | QNIQEHLGFLQK              | a                        |
| IP100412298       | FRAP-related protein                                                                     | QTEEIK                    | a                        |
| IP100412298       | FRAP-related protein                                                                     | SDRVQMRNDLGK              | a                        |
| IP100465439       | Fructose-bisphosphate aldolase A                                                         | ADDGRFPQVIK               | c; d; e                  |
| IP100465439       | Fructose-bisphosphate aldolase A                                                         | ALANSLAQQGK               | d; e                     |
| IP100465439       | Fructose-bisphosphate aldolase A                                                         | ALQASALK                  | c; d; e                  |
| IP100465439       | Fructose-bisphosphate aldolase A                                                         | CQYVTEK                   | d; e                     |
| IP100465439       | Fructose-bisphosphate aldolase A                                                         | ELSDIAHR                  | c; d                     |
| IP100465439       | Fructose-bisphosphate aldolase A                                                         | FSHEIAMATVTALR            | d; e                     |
| IP100465439       | Fructose-bisphosphate aldolase A                                                         | GGVVGIK                   | d; e                     |
| IP100465439       | Fructose-bisphosphate aldolase A                                                         | GILAADESTGSIK             | c; d; h                  |
| IP100465439       | Fructose-bisphosphate aldolase A                                                         | GVVPLAGTNETTTQGLDGLSER    | c; d; e                  |
| IP100465439       | Fructose-bisphosphate aldolase A                                                         | IGEHTPSALAIMENANVLAR      | d; e                     |
| IP100465439       | Fructose-bisphosphate aldolase A                                                         | IVAPGK                    | c; d; e                  |
| IP100465439       | Fructose-bisphosphate aldolase A                                                         | KDGFADFAK                 | c; d                     |
| IP100465439       | Fructose-bisphosphate aldolase A                                                         | LQSIGTENTEENR             | c; d; e                  |
| IP100465439       | Fructose-bisphosphate aldolase A                                                         | LQSIGTENTEENRR            | c; d                     |
| IP100465439       | Fructose-bisphosphate aldolase A                                                         | PYQYPALTEQK               | c; d; e                  |
| IP100465439       | Fructose-bisphosphate aldolase A                                                         | QLLLTADDR                 | c; d                     |
| IP100465439       | Fructose-bisphosphate aldolase A                                                         | YLAAYYK                   | c; e                     |
| IP100465439       | Fructose-bisphosphate aldolase A                                                         | YASICQNGIVPIPEILLPGDHDHLK | d                        |
| IP100465439       | Fructose-bisphosphate aldolase A                                                         | YTPSQAGAAASESLFVSNHAY     | d                        |
| IP100418262       | Fructose-bisphosphate aldolase C                                                         | ALQASALNAWR               | d; e                     |
| IP100418262       | Fructose-bisphosphate aldolase C                                                         | DDNGVPEFR                 | d                        |
| IP100418262       | Fructose-bisphosphate aldolase C                                                         | DGADFAK                   | d                        |
| IP100418262       | Fructose-bisphosphate aldolase C                                                         | DNAGAAATEEFIK             | c; d; e                  |
| IP100418262       | Fructose-bisphosphate aldolase C                                                         | ELSDIALR                  | d; e                     |
| IP100418262       | Fructose-bisphosphate aldolase C                                                         | GILAADESVGSMK             | d; h                     |
| IP100418262       | Fructose-bisphosphate aldolase C                                                         | GIVVGIK                   | c; d                     |
| IP100418262       | Fructose-bisphosphate aldolase C                                                         | GVVPLAGTIDGETTTQGLDGLSER  | c; d; e                  |
| IP100418262       | Fructose-bisphosphate aldolase C                                                         | LSQIGVENTEENR             | c; d                     |
| IP100418262       | Fructose-bisphosphate aldolase C                                                         | LSQIGVENTEENRR            | c; d                     |
| IP100418262       | Fructose-bisphosphate aldolase C                                                         | PHSYPALSAEQK              | c                        |
| IP100418262       | Fructose-bisphosphate aldolase C                                                         | QVLFSAADDR                | d; e                     |
| IP100418262       | Fructose-bisphosphate aldolase C                                                         | TIQDK                     | d                        |
| IP100418262       | Fructose-bisphosphate aldolase C                                                         | TPSALAILANANVLAR          | d; e                     |
| IP100418262       | Fructose-bisphosphate aldolase C                                                         | YEGSGEDGGAAQSLYIANHAY     | c; d; e                  |
| IP100418262       | Fructose-bisphosphate aldolase C                                                         | YTPPEIAMIATVTALR          | c; d; e                  |
| IP100747810       | FSCN1 protein                                                                            | ASAETVDPASLWEY            | c                        |
| IP100747810       | FSCN1 protein                                                                            | DVPWGVDSLITLAFQDQR        | d                        |
| IP100747810       | FSCN1 protein                                                                            | FLIVAHDDGR                | c; d                     |
| IP100747810       | FSCN1 protein                                                                            | GDHAGVLK                  | c                        |
| IP100747810       | FSCN1 protein                                                                            | WSLQSEHR                  | c; d                     |
| IP100747810       | FSCN1 protein                                                                            | YLAADKGNVTCER             | b; c; d                  |
| IP100747810       | FSCN1 protein                                                                            | YLAISPGSGTLK              | c                        |
| IP100747810       | FSCN1 protein                                                                            | YLTAEAFGFK                | c; d; e                  |
| IP100747810       | FSCN1 protein                                                                            | YSVQTADHR                 | d                        |
| IP100217686       | Ftsd homolog 3                                                                           | IRQLPVGK                  | a                        |
| IP100217686       | Ftsd homolog 3                                                                           | SRGPK                     | a                        |
| IP100217686       | Ftsd homolog 3                                                                           | TEIMSPLYQDEAPK            | a                        |
| IP100384016       | Full-length cDNA 5-PRIME end of clone CS0D1009YL13 of T cells (Fragment)                 | AKPAEAPAAAAPK             | c; d; e                  |
| IP100479784       | Full-length cDNA 5-PRIME end of clone CS0DK010YN05 of HeLa cells of Homo sapiens (Fragm) | NGAGSLR                   | d                        |
| IP100017327       | Full-length cDNA clone CS0DC015YD01                                                      | AKGTEAEEY                 | a                        |

| IPI Accession No. | Protein Description                                        | Peptide Sequence*          | Primary Source Dataset** |
|-------------------|------------------------------------------------------------|----------------------------|--------------------------|
| IP00017327        | Full-length cDNA clone CS0DC015YD01                        | IGSMK                      | a                        |
| IP00017327        | Full-length cDNA clone CS0DC015YD01                        | NCTNSPAIVR                 | a                        |
| IP000375442       | Full-length cDNA clone CS0DH002YN05                        | DFMFQPLDGLK                | a                        |
| IP000375442       | Full-length cDNA clone CS0DH002YN05                        | DISTEMIR                   | a                        |
| IP000375442       | Full-length cDNA clone CS0DH002YN05                        | VVQPVMTSLRMTR              | a                        |
| IP000375442       | Full-length cDNA clone CS0DH002YN05                        | SPAFTDQSSFTPTSLMED         | a                        |
| IP000384174       | Full-length cDNA clone CS0D028YM15                         | ELQDLALQGAQ                | a                        |
| IP000383975       | Full-length cDNA clone CS0DN001YP04                        | GYPEEK                     | a                        |
| IP000383975       | Full-length cDNA clone CS0DN001YP04                        | HQNLLK                     | a                        |
| IP000383975       | Full-length cDNA clone CS0DN001YP04                        | HSGFDELSSEYLENQSS          | a                        |
| IP000383975       | Full-length cDNA clone CS0DN001YP04                        | RGWRPSSREDSLEAGLP          | a                        |
| IP000383975       | Full-length cDNA clone CS0DN001YP04                        | RPEDQELESLSAIEAELE         | a                        |
| IP000383975       | Full-length cDNA clone CS0DN001YP04                        | SGELEQEER                  | a                        |
| IP00018387        | Furin precursor                                            | DMQHLVVTSKPAHLNA           | a                        |
| IP00018387        | Furin precursor                                            | LAEEAIFR                   | a                        |
| IP00018387        | Furin precursor                                            | YFTNTWAIVR                 | a                        |
| IP00067920        | PXYD domain-containing ion transport regulator 7           | SELPSSAPGGGGV              | d; e                     |
| IP00001580        | FYVE and coiled-coil domain containing 1                   | AAVSGQEQQLQTERERG          | a                        |
| IP000412541       | G protein coupled receptor 158                             | EEXWDSFK                   | a                        |
| IP000412541       | G protein coupled receptor 158                             | GLGHSWRRK                  | a                        |
| IP000412541       | G protein coupled receptor 158                             | SIMRRITEIPETVSR            | a                        |
| IP000412541       | G protein coupled receptor 158                             | TAQRIPYMTGGR               | a                        |
| IP000412541       | G protein coupled receptor 158                             | LQFIADHCPTLRVEALK          | a                        |
| IP000412541       | G protein coupled receptor 158                             | DSGVVSLIETLLNYPSSR         | a                        |
| IP000412541       | G protein coupled receptor 158                             | ELVNTDTESEFRR              | a                        |
| IP000412541       | G protein coupled receptor 158                             | QEASPSNDFK                 | a                        |
| IP000412541       | G protein coupled receptor 158                             | TQAQIMPGARPK               | a                        |
| IP000332155       | G protein-regulated inducer of neurite                     | ADSAFPR                    | a                        |
| IP000332155       | G protein-regulated inducer of neurite                     | ALGSARSPEGAR               | a                        |
| IP000332155       | G protein-regulated inducer of neurite                     | ALLQSVRRPRCCSR             | a                        |
| IP000332155       | G protein-regulated inducer of neurite                     | EDPISAGSR                  | a                        |
| IP000332155       | G protein-regulated inducer of neurite                     | GEPVSLGK                   | a                        |
| IP000332155       | G protein-regulated inducer of neurite                     | GMTWEVYGAAMEYEV            | a                        |
| IP000332155       | G protein-regulated inducer of neurite                     | HRSFSGAGEGASCSDGP          | a                        |
| IP000332155       | G protein-regulated inducer of neurite                     | MDPMSGKPELLSPGQA           | a                        |
| IP000477434       | G-2 and S-phase expressed 1                                | AIPVPSK                    | a                        |
| IP000477434       | G-2 and S-phase expressed 1                                | EGGGGRDEPSACK              | a                        |
| IP000477434       | G-2 and S-phase expressed 1                                | LTRAPGPPHSAHALPR           | a                        |
| IP000477434       | G-2 and S-phase expressed 1                                | RRDCLNSK                   | a                        |
| IP000749006       | Galactose oxidase, central domain containing protein       | AGGEAAGTR                  | d; e                     |
| IP000219219       | Galectin-1                                                 | CVAFD                      | e                        |
| IP000219219       | Galectin-1                                                 | DGGAWGTEQR                 | d                        |
| IP000219219       | Galectin-1                                                 | DSNNLCLHFNPR               | b; d                     |
| IP000219219       | Galectin-1                                                 | FNAHGANTIVCNSK             | b; d                     |
| IP000219219       | Galectin-1                                                 | GEVAPDAK                   | c; d                     |
| IP000219219       | Galectin-1                                                 | LNLEAINYMAADGDFK           | d                        |
| IP00023673        | Galectin-3 binding protein precursor                       | SLGWLK                     | a                        |
| IP000000111       | GalNAc-4-sulfotransferase 2                                | KTEETQEK                   | a                        |
| IP000000111       | GalNAc-4-sulfotransferase 2                                | LVSADR                     | a                        |
| IP000000111       | GalNAc-4-sulfotransferase 2                                | QPSEIVMNPK                 | a                        |
| IP000000111       | GalNAc-4-sulfotransferase 2                                | STGSPTEK                   | a                        |
| IP000026358       | Gamma-aminobutyric acid receptor-associated protein-like 2 | AIFLVYDK                   | c; d                     |
| IP000026358       | Gamma-aminobutyric acid receptor-associated protein-like 2 | VPVIVEK                    | d                        |
| IP000216171       | Gamma-enolase                                              | ACNCLLLK                   | c                        |
| IP000216171       | Gamma-enolase                                              | AGYTEK                     | c; d                     |
| IP000216171       | Gamma-enolase                                              | AVDHINSTIAPALISSGLSVVEQEK  | d                        |
| IP000216171       | Gamma-enolase                                              | DATNVGDEGGFAPNILENSEALELVK | d; e                     |
| IP000216171       | Gamma-enolase                                              | DGKYDLDFK                  | d                        |
| IP000216171       | Gamma-enolase                                              | DYPVVSIEDPFDQDDWAWSK       | d; e                     |
| IP000216171       | Gamma-enolase                                              | EAIK                       | d                        |
| IP000216171       | Gamma-enolase                                              | EILDSR                     | c; d                     |
| IP000216171       | Gamma-enolase                                              | ELPLYR                     | c; d; e                  |
| IP000216171       | Gamma-enolase                                              | FAGHNFR                    | c; d                     |
| IP000216171       | Gamma-enolase                                              | FGANAILGVSLAVCK            | d                        |
| IP000216171       | Gamma-enolase                                              | GNPTVEVDLYTAK              | d                        |
| IP000216171       | Gamma-enolase                                              | IEELGDEAR                  | c; d                     |
| IP000216171       | Gamma-enolase                                              | IVIGMDVAASEFYR             | d; g                     |
| IP000216171       | Gamma-enolase                                              | LAMQEFMILPVGAESFR          | c; d; e                  |
| IP000216171       | Gamma-enolase                                              | LAQENGWGMVSHR              | d                        |
| IP000216171       | Gamma-enolase                                              | LDNLMLELDGTENK             | c; d                     |
| IP000216171       | Gamma-enolase                                              | LGAEVYHTLK                 | d                        |
| IP000216171       | Gamma-enolase                                              | SPTDPSR                    | c; d                     |
| IP000216171       | Gamma-enolase                                              | VNQGVSVEAIQACK             | c; d; g                  |
| IP000216171       | Gamma-enolase                                              | YITGDLGALYQDFVR            | c; d; e                  |
| IP000216171       | Gamma-enolase                                              | YNQLMR                     | d                        |
| IP000293817       | Gamma-soluble NSF attachment protein                       | AVQLYQQTANVFENEER          | d; e                     |
| IP000293817       | Gamma-soluble NSF attachment protein                       | AYEQAGMMLK                 | d                        |
| IP000297714       | Gamma-synuclein                                            | EDLRPSAPQGEQGEASK          | c; d                     |
| IP000297714       | Gamma-synuclein                                            | EEVAEEAQSGGD               | c                        |
| IP000297714       | Gamma-synuclein                                            | EGVMYVGAQ                  | c; d                     |
| IP000297714       | Gamma-synuclein                                            | EGVVGAVEK                  | d                        |
| IP000297714       | Gamma-synuclein                                            | EKEEVAEEAQSGGD             | c; d; e                  |
| IP000297714       | Gamma-synuclein                                            | ENVVQSVTSVAEK              | d                        |
| IP000297714       | Gamma-synuclein                                            | GFSIAK                     | c; d                     |
| IP000297714       | Gamma-synuclein                                            | HWLAR                      | a                        |
| IP000297714       | Gamma-synuclein                                            | ISVEGSFLAVK                | a                        |
| IP000297714       | Gamma-synuclein                                            | KEDLRPSAPQGEQGEASK         | c; d                     |
| IP000297714       | Gamma-synuclein                                            | TKENVVQSVTSVAEK            | c                        |
| IP000297714       | Gamma-synuclein                                            | TVEEAENIATVSGVVR           | a; c; d; e               |
| IP00019994        | Gamma-taxilin                                              | ALGAHLEAEPK                | a; c; d; e               |
| IP00019994        | Gamma-taxilin                                              | EFLK                       | a                        |
| IP00019994        | Gamma-taxilin                                              | EQVSIK                     | a                        |
| IP00019994        | Gamma-taxilin                                              | LQTTQLIK                   | a                        |
| IP00019994        | Gamma-taxilin                                              | QEMKMTKK                   | a                        |
| IP00045492        | Gamma-tubulin complex component 5                          | MESIEK                     | a                        |
| IP000290544       | Ganglioside-induced differentiation-associated protein 1   | LAEEPDLQEAIIAK             | e                        |
| IP000290544       | Ganglioside-induced differentiation-associated protein 1   | LMPDKESMYPR                | e                        |

| IPI Accession No. | Protein Description                                      | Peptide Sequence*     | Primary Source Dataset** |
|-------------------|----------------------------------------------------------|-----------------------|--------------------------|
| IP100290544       | Ganglioside-induced differentiation-associated protein 1 | YLDQVETELQR           | d; e                     |
| IP100030763       | Gap junction beta-6 protein                              | DIEDIK                | d                        |
| IP100465260       | GARS protein                                             | FADFVVK               | c                        |
| IP100169377       | GAS2-related protein isoform beta                        | SFGPAECLGLR           | a                        |
| IP100169377       | GAS2-related protein isoform beta                        | VGVSCNGAAQPGTFQAR     | a                        |
| IP100169377       | GAS2-related protein isoform beta                        | YTPLPLGGNK            | a                        |
| IP100640006       | GDP dissociation inhibitor 2                             | VICLSHPFK             | c                        |
| IP100014361       | GDP-L-fucose synthetase                                  | MIDVQNR               | d                        |
| IP100641047       | Geisolin                                                 | ANSAGATR              | d                        |
| IP100641047       | Geisolin                                                 | HVVPNEVYVQR           | c; d; e                  |
| IP100641047       | Geisolin                                                 | IFVWK                 | e                        |
| IP100641047       | Geisolin                                                 | TPSAAYLWVGTGASEAEK    | e                        |
| IP100641047       | Geisolin                                                 | YIETDPANR             | c; d; e                  |
| IP100292376       | Gem-interacting protein                                  | EANARQQDLEIAKQR       | a                        |
| IP100292376       | Gem-interacting protein                                  | GHFSRQPCKYPR          | a                        |
| IP100292376       | Gem-interacting protein                                  | RTEIEK                | a                        |
| IP100411438       | GLE1 RNA export mediator-like                            | QAEQERLR              | a                        |
| IP100411438       | GLE1 RNA export mediator-like                            | RQDEEAQVK             | a                        |
| IP100021595       | Glucocorticoid induced transcript 1                      | GSPSPSPITPAAAAPEAQAPR | e                        |
| IP100289800       | glucose-6-phosphate dehydrogenase                        | GGYDFEGHIR            | d                        |
| IP100027497       | Glucose-6-phosphate isomerase                            | AVLHVLR               | c; d                     |
| IP100027497       | Glucose-6-phosphate isomerase                            | DPQFQK                | c; d; e                  |
| IP100027497       | Glucose-6-phosphate isomerase                            | DPSAVAK               | c                        |
| IP100027497       | Glucose-6-phosphate isomerase                            | DVMPEVNK              | d                        |
| IP100027497       | Glucose-6-phosphate isomerase                            | ELQAAGK               | c; d; e                  |
| IP100027497       | Glucose-6-phosphate isomerase                            | EWFLQAAK              | d; e                     |
| IP100027497       | Glucose-6-phosphate isomerase                            | HFVALSTNTK            | d                        |
| IP100027497       | Glucose-6-phosphate isomerase                            | ILLANFLAQTEALMR       | d                        |
| IP100027497       | Glucose-6-phosphate isomerase                            | INYTEGR               | c; d                     |
| IP100027497       | Glucose-6-phosphate isomerase                            | KELQAAGK              | d                        |
| IP100027497       | Glucose-6-phosphate isomerase                            | LQQWYR                | e                        |
| IP100027497       | Glucose-6-phosphate isomerase                            | MIPCDFLIPVQTQHPHR     | b; d; e                  |
| IP100027497       | Glucose-6-phosphate isomerase                            | MLVDLAK               | c                        |
| IP100027497       | Glucose-6-phosphate isomerase                            | NLVTEDVMR             | d                        |
| IP100027497       | Glucose-6-phosphate isomerase                            | SNTPLVDGK             | d                        |
| IP100027497       | Glucose-6-phosphate isomerase                            | SPEDLR                | c; d                     |
| IP100027497       | Glucose-6-phosphate isomerase                            | TFTTQETTNAETAK        | d                        |
| IP100027497       | Glucose-6-phosphate isomerase                            | VFEGNRPTNSIVFTK       | c; d                     |
| IP100027497       | Glucose-6-phosphate isomerase                            | VWYVSNIDGTHIAK        | d                        |
| IP100396613       | GluR6 kainate receptor                                   | APSRYNLR              | a                        |
| IP100396613       | GluR6 kainate receptor                                   | MESPIDSADDLAK         | a                        |
| IP100396613       | GluR6 kainate receptor                                   | QSVLVK                | a                        |
| IP100455154       | Glutamate [NMDA] receptor subunit 3A                     | AEALWPR               | a                        |
| IP100455154       | Glutamate [NMDA] receptor subunit 3A                     | AFSLRVSVMRR           | a                        |
| IP100455154       | Glutamate [NMDA] receptor subunit 3A                     | LDAFIMDK              | a                        |
| IP100297677       | Glutamate [NMDA] receptor subunit 3B                     | EETAEAEPK             | a                        |
| IP100012796       | Glutamate decarboxylase 2                                | LWLMWR                | e                        |
| IP100016801       | Glutamate dehydrogenase 1, mitochondrial precursor       | DDGSWEVIEGYR          | c; d; e                  |
| IP100016801       | Glutamate dehydrogenase 1, mitochondrial precursor       | DIVHSGLAYTMR          | c; d                     |
| IP100016801       | Glutamate dehydrogenase 1, mitochondrial precursor       | DSNYHLLMSVQESLER      | d                        |
| IP100016801       | Glutamate dehydrogenase 1, mitochondrial precursor       | ELEDFK                | d                        |
| IP100016801       | Glutamate dehydrogenase 1, mitochondrial precursor       | ESEFOK                | d                        |
| IP100016801       | Glutamate dehydrogenase 1, mitochondrial precursor       | ESEEQKR               | c; d                     |
| IP100016801       | Glutamate dehydrogenase 1, mitochondrial precursor       | GASIVEDK              | d                        |
| IP100016801       | Glutamate dehydrogenase 1, mitochondrial precursor       | GFGFGIDVPAPDMSTGER    | c; d; e                  |
| IP100016801       | Glutamate dehydrogenase 1, mitochondrial precursor       | HGGTIPVPTAEFQDR       | d; e                     |
| IP100016801       | Glutamate dehydrogenase 1, mitochondrial precursor       | IFLER                 | c                        |
| IP100016801       | Glutamate dehydrogenase 1, mitochondrial precursor       | ISATGR                | c                        |
| IP100016801       | Glutamate dehydrogenase 1, mitochondrial precursor       | ISGASEK               | c                        |
| IP100016801       | Glutamate dehydrogenase 1, mitochondrial precursor       | KGFGIDVPAPDMSTGER     | d; e                     |
| IP100016801       | Glutamate dehydrogenase 1, mitochondrial precursor       | MVEGFFDR              | c; d                     |
| IP100016801       | Glutamate dehydrogenase 1, mitochondrial precursor       | NYTDNELEK             | c; d; e                  |
| IP100016801       | Glutamate dehydrogenase 1, mitochondrial precursor       | TAAYVNAIEK            | c; d                     |
| IP100016801       | Glutamate dehydrogenase 1, mitochondrial precursor       | TFVVGFGVGLHSMR        | d                        |
| IP100016801       | Glutamate dehydrogenase 1, mitochondrial precursor       | VYNEAGVTTT            | c; d; e                  |
| IP100016801       | Glutamate dehydrogenase 1, mitochondrial precursor       | YNLGLDLR              | c; d                     |
| IP100016801       | Glutamate dehydrogenase 1, mitochondrial precursor       | YSTDVSDVEYK           | c; d; e                  |
| IP100642894       | Glutamate transporter variant EAAT1ex9skip               | FQQGVR                | d; e                     |
| IP100642894       | Glutamate transporter variant EAAT1ex9skip               | TITNVLGDSLGAAGIVEHLR  | d; e                     |
| IP100642894       | Glutamate transporter variant EAAT1ex9skip               | YTAADAFDLIR           | d; e                     |
| IP100642894       | Glutamate transporter variant EAAT1ex9skip               | YSPFGELLMR            | d; e                     |
| IP100010130       | Glutamine synthetase                                     | ACLYAGVK              | d                        |
| IP100010130       | Glutamine synthetase                                     | DIVEAHYR              | c; d                     |
| IP100010130       | Glutamine synthetase                                     | GYFEDR                | d                        |
| IP100010130       | Glutamine synthetase                                     | KDPNK                 | d                        |
| IP100010130       | Glutamine synthetase                                     | KGYFEDR               | d                        |
| IP100010130       | Glutamine synthetase                                     | LTGFHETSINDFSGAVNR    | d                        |
| IP100010130       | Glutamine synthetase                                     | LVLCEVFK              | d; e                     |
| IP100010130       | Glutamine synthetase                                     | QVYMSLPQGEK           | d                        |
| IP100010130       | Glutamine synthetase                                     | RPSANCDPFSVTEALIR     | d                        |
| IP100010130       | Glutamine synthetase                                     | TCLLNETGDEPFQYK       | c; d; e                  |
| IP100010130       | Glutamine synthetase                                     | TCLLNETGDEPFQYK       | d                        |
| IP100010130       | Glutamine synthetase                                     | TVGQEK                | d                        |
| IP100010130       | Glutamine synthetase                                     | VQAMYIWDGTGEGLR       | d; e                     |
| IP100010130       | Glutamine synthetase                                     | YIEAIEK               | d                        |
| IP100219025       | Glutaredoxin-1                                           | VFIGK                 | c                        |
| IP100333763       | Glutaredoxin-related protein 5                           | DYAAYNVLDLPELR        | d; e                     |
| IP100398780       | Glutathione peroxidase 1 isoform 2                       | DYTMNELQR             | c                        |
| IP100246975       | Glutathione S-transferase Mu 3                           | FSWFAGEK              | d                        |
| IP100246975       | Glutathione S-transferase Mu 3                           | IAAYLQSDQFCK          | d                        |
| IP100246975       | Glutathione S-transferase Mu 3                           | LLLEFDTSYEK           | d                        |
| IP100246975       | Glutathione S-transferase Mu 3                           | VDHENVMDIFR           | d; e                     |
| IP100246975       | Glutathione S-transferase Mu 3                           | YTCGEAPVDYR           | d                        |
| IP100513927       | Glutathione S-transferase omega 1                        | HEVINLTK              | d                        |
| IP100219757       | Glutathione S-transferase P                              | ASCLYGOLPK            | d                        |
| IP100219757       | Glutathione S-transferase P                              | DQQEAALVDMVNDGVEDLR   | c; d; e                  |
| IP100219757       | Glutathione S-transferase P                              | EEVTVTWEQESLK         | d                        |



| IPI Accession No. | Protein Description                                    | Peptide Sequence*       | Primary Source Dataset** |
|-------------------|--------------------------------------------------------|-------------------------|--------------------------|
| IP100219757       | Glutathione S-transferase P                            | FQDGLTLYQSNILR          | c; d; e                  |
| IP100219757       | Glutathione S-transferase P                            | MLLADQGQSWK             | c                        |
| IP100219757       | Glutathione S-transferase P                            | PPYTVVYFVVR             | c; d; e                  |
| IP100019755       | Glutathione transferase omega-1                        | GSAPPGPVPEGSIR          | d                        |
| IP100019755       | Glutathione transferase omega-1                        | LWMAAMK                 | c                        |
| IP100019755       | Glutathione transferase omega-1                        | MILELFSK                | c; d; e                  |
| IP100019755       | Glutathione transferase omega-1                        | YPSLVGSFIR              | c; d                     |
| IP100219018       | Glyceraldehyde-3-phosphate dehydrogenase               | AGAHLQGGAK              | d                        |
| IP100219018       | Glyceraldehyde-3-phosphate dehydrogenase               | FHGTVK                  | c; d                     |
| IP100219018       | Glyceraldehyde-3-phosphate dehydrogenase               | GALQNHIPASTGAAK         | c; d; e; f; g; h         |
| IP100219018       | Glyceraldehyde-3-phosphate dehydrogenase               | LISWYDNEFGYSNR          | c; d; e                  |
| IP100219018       | Glyceraldehyde-3-phosphate dehydrogenase               | LTGMAFR                 | c; d; e                  |
| IP100219018       | Glyceraldehyde-3-phosphate dehydrogenase               | LVINGNPITTFQER          | c; d                     |
| IP100219018       | Glyceraldehyde-3-phosphate dehydrogenase               | LVINGNPITTFQERDPSK      | d                        |
| IP100219018       | Glyceraldehyde-3-phosphate dehydrogenase               | QASEGPLK                | d                        |
| IP100219018       | Glyceraldehyde-3-phosphate dehydrogenase               | TVDGPSGK                | d                        |
| IP100219018       | Glyceraldehyde-3-phosphate dehydrogenase               | VIASAPSADAPMFVMGVNHEK   | c; d                     |
| IP100219018       | Glyceraldehyde-3-phosphate dehydrogenase               | VPELNGK                 | d                        |
| IP100219018       | Glyceraldehyde-3-phosphate dehydrogenase               | VPTANVSVDLTCR           | c; d                     |
| IP100219018       | Glyceraldehyde-3-phosphate dehydrogenase               | VYDLMAHMASK             | c; d                     |
| IP100219018       | Glyceraldehyde-3-phosphate dehydrogenase               | VYDLMAHMASKE            | d                        |
| IP100219018       | Glyceraldehyde-3-phosphate dehydrogenase               | WGDAGAEYVVESTGVFTMEK    | d                        |
| IP100219018       | Glyceraldehyde-3-phosphate dehydrogenase               | YDDIK                   | c; d; e                  |
| IP100219018       | Glyceraldehyde-3-phosphate dehydrogenase               | YDNSLK                  | c; d                     |
| IP100295777       | Glycerol-3-phosphate dehydrogenase [NAD+], cytoplasmic | IVGGNAQLAQFDPR          | c                        |
| IP100032959       | Glycerol-3-phosphate dehydrogenase 1-like              | LQGPQTSAEVYR            | e                        |
| IP100295388       | Glycine dehydrogenase                                  | AELDRFCAMISIR           | a                        |
| IP100295388       | Glycine dehydrogenase                                  | EVLGRAAQR               | a                        |
| IP100295388       | Glycine dehydrogenase                                  | FCDAMISIRQELADIEEGRI    | a                        |
| IP100295388       | Glycine dehydrogenase                                  | LLERLLPRHDDFAR          | a                        |
| IP100295388       | Glycine dehydrogenase                                  | MQSCARAWGLR             | a                        |
| IP100295388       | Glycine dehydrogenase                                  | SRDSSGGGDSAAAGAS        | a                        |
| IP100004358       | Glycogen phosphorylase, brain form                     | AWETTK                  | d                        |
| IP100004358       | Glycogen phosphorylase, brain form                     | DYFFALAHIVR             | c; d                     |
| IP100004358       | Glycogen phosphorylase, brain form                     | EIWGWVPSDLQIPPNIPR      | e                        |
| IP100004358       | Glycogen phosphorylase, brain form                     | EIWGWVPSDLQIPPNIPRD     | e                        |
| IP100004358       | Glycogen phosphorylase, brain form                     | EYVDHLPELK              | d                        |
| IP100004358       | Glycogen phosphorylase, brain form                     | HLDHVAALFPGDVDR         | d                        |
| IP100004358       | Glycogen phosphorylase, brain form                     | HLEIYAINOR              | c                        |
| IP100004358       | Glycogen phosphorylase, brain form                     | HLHFTLVK                | d                        |
| IP100004358       | Glycogen phosphorylase, brain form                     | IGEEFLTDLSQLK           | d; e                     |
| IP100004358       | Glycogen phosphorylase, brain form                     | INSSMFDVHVK             | d                        |
| IP100004358       | Glycogen phosphorylase, brain form                     | LLPLVSEVFIK             | d; e                     |
| IP100004358       | Glycogen phosphorylase, brain form                     | LQDFNVGDYIEAVLDR        | d                        |
| IP100004358       | Glycogen phosphorylase, brain form                     | LWSAK                   | c                        |
| IP100004358       | Glycogen phosphorylase, brain form                     | VAIQLNDTHPALSIPELMR     | e                        |
| IP100004358       | Glycogen phosphorylase, brain form                     | VDWDK                   | e                        |
| IP100004358       | Glycogen phosphorylase, brain form                     | VKQENK                  | c                        |
| IP100004358       | Glycogen phosphorylase, brain form                     | VLYPNDNFFEGK            | d                        |
| IP100004358       | Glycogen phosphorylase, brain form                     | WVPSMFEK                | c                        |
| IP100292228       | Glycogen synthase kinase-3 alpha                       | TPPEAIALCSSLLEYTPSSR    | d                        |
| IP100401212       | glycoprotein M6A isoform 3                             | QFGIVTIGEEK             | d; e                     |
| IP100401212       | glycoprotein M6A isoform 3                             | SKEEQELHDIHSTR          | d; h                     |
| IP100187158       | glycoprotein M6B isoform 1                             | AKEEQELQDIQSR           | c; d                     |
| IP100187158       | glycoprotein M6B isoform 1                             | ELHGEFK                 | d                        |
| IP100187158       | glycoprotein M6B isoform 1                             | MQAYQDIK                | d; e                     |
| IP100187158       | glycoprotein M6B isoform 1                             | QYGIIPWNAFFGK           | e                        |
| IP10037448        | Glyoxylate reductase/hydroxypyruvate reductase         | DDFFQK                  | c                        |
| IP100477944       | Gm133                                                  | EKKVVKPVR               | a                        |
| IP100477944       | Gm133                                                  | KLPEMIRQSAISSFR         | a                        |
| IP100477944       | Gm133                                                  | LLGCASK                 | a                        |
| IP100477944       | Gm133                                                  | TRDEK                   | a                        |
| IP100418376       | GM2 activator protein                                  | EGTYSLPK                | a                        |
| IP100418376       | GM2 activator protein                                  | IAASLK                  | a                        |
| IP100418376       | GM2 activator protein                                  | IESVLSGGK               | a                        |
| IP100418376       | GM2 activator protein                                  | SEFVVPDLELPSWLTGN       | a                        |
| IP100418376       | GM2 ganglioside activator precursor                    | SEFVVPDLELPSWLTGNVYR    | d                        |
| IP100031115       | Golgi autoantigen, golgin subfamily A                  | ELEQLTQASEEQLQASK       | a                        |
| IP100031115       | Golgi autoantigen, golgin subfamily A                  | IAEETAVAQRPGGATR        | a                        |
| IP100031115       | Golgi autoantigen, golgin subfamily A                  | LEIALEK                 | a                        |
| IP100031115       | Golgi autoantigen, golgin subfamily A                  | MDQLEK                  | a                        |
| IP100031115       | Golgi autoantigen, golgin subfamily A                  | NEVERSLQNHQFELK         | a                        |
| IP100004671       | Golgi autoantigen, golgin subfamily B                  | AQEIYEK                 | a                        |
| IP100004671       | Golgi autoantigen, golgin subfamily B                  | DLVEMEQQ                | a                        |
| IP100004671       | Golgi autoantigen, golgin subfamily B                  | DVQLQKQ                 | a                        |
| IP100004671       | Golgi autoantigen, golgin subfamily B                  | EALKENKSLQEELSLAR       | a                        |
| IP100004671       | Golgi autoantigen, golgin subfamily B                  | EEDVSYLSGQLSEKEAAL      | a                        |
| IP100004671       | Golgi autoantigen, golgin subfamily B                  | EIKELENLLSQEEENIVL      | a                        |
| IP100004671       | Golgi autoantigen, golgin subfamily B                  | ENLAQAVEIR              | a                        |
| IP100004671       | Golgi autoantigen, golgin subfamily B                  | LLMVTK                  | a                        |
| IP100004671       | Golgi autoantigen, golgin subfamily B                  | NETFAEER                | a                        |
| IP100004671       | Golgi autoantigen, golgin subfamily B                  | QDQDK                   | a                        |
| IP100004671       | Golgi autoantigen, golgin subfamily B                  | SMSSLQNRDR              | a                        |
| IP100004671       | Golgi autoantigen, golgin subfamily B                  | SSKJAEVWQEK             | a                        |
| IP100171411       | Golgi phosphoprotein 2                                 | DQLVIPGQEEEQEAAG        | a                        |
| IP100171411       | Golgi phosphoprotein 2                                 | DTINLLDQR               | a                        |
| IP100171411       | Golgi phosphoprotein 2                                 | GFGGAGELGQTPQVQAA       | a                        |
| IP100171411       | Golgi phosphoprotein 2                                 | LPQEPGR                 | a                        |
| IP100171411       | Golgi phosphoprotein 2                                 | MGLNGRRSMK              | a                        |
| IP100171411       | Golgi phosphoprotein 2                                 | NQTNLERKFSYDLSQCIN      | a                        |
| IP100171411       | Golgi phosphoprotein 2                                 | RDITNLLDQREK            | a                        |
| IP100099315       | Golgi resident protein GCP60                           | GPGASGEQPEPGEAAAGAAEEAR | e                        |
| IP100021954       | Golgi-specific brefeldin A-resistance                  | AGGMSDSSK               | a                        |
| IP100021954       | Golgi-specific brefeldin A-resistance                  | EGSMLRRPR               | a                        |
| IP100021954       | Golgi-specific brefeldin A-resistance                  | KMIGEFVSDR              | a                        |
| IP100021954       | Golgi-specific brefeldin A-resistance                  | LLENISPADVGGMEETR       | a                        |
| IP100021954       | Golgi-specific brefeldin A-resistance                  | LPGEAPVIQRLEAFTER       | a                        |



| IPi Accession No. | Protein Description                                                                     | Peptide Sequence*      | Primary Source Dataset** |
|-------------------|-----------------------------------------------------------------------------------------|------------------------|--------------------------|
| IPi00021954       | Golgi-specific brefeldin A-resistance                                                   | MIGFVSDR               | a                        |
| IPi00021954       | Golgi-specific brefeldin A-resistance                                                   | QNAPMTLEEFK            | a                        |
| IPi00021954       | Golgi-specific brefeldin A-resistance                                                   | SKEGMLRRPR             | a                        |
| IPi00021954       | Golgi-specific brefeldin A-resistance                                                   | VGCVWTVR               | a                        |
| IPi00297578       | GPBB-interacting protein A                                                              | IKELSQEVEER            | a                        |
| IPi00297578       | GPBB-interacting protein A                                                              | LQSLAEIEK              | a                        |
| IPi00297578       | GPBB-interacting protein A                                                              | MDLALLEAQYGFVTPKK      | a                        |
| IPi00297578       | GPBB-interacting protein A                                                              | QTILEEIEEKKR           | a                        |
| IPi00297578       | GPBB-interacting protein A                                                              | SQEEKEQEK              | a                        |
| IPi0008239        | G-protein coupled receptor family C group 5 member B precursor                          | ETAFEDVQLPR            | d; e                     |
| IPi00427956       | GRINL1A complex protein 1 Gcom1                                                         | EEMNYIK                | a                        |
| IPi00427956       | GRINL1A complex protein 1 Gcom1                                                         | ISFLEGENNELQSR         | a                        |
| IPi00427956       | GRINL1A complex protein 1 Gcom1                                                         | KRMYGDYDEMIR           | a                        |
| IPi00023001       | growth and transformation-dependent protein                                             | ILWVSGR                | d; e                     |
| IPi00030111       | Growth/differentiation factor 11 precursor                                              | GEAAEGPAAAAA           | a                        |
| IPi00030111       | Growth/differentiation factor 11 precursor                                              | IELHSR                 | a                        |
| IPi00030111       | Growth/differentiation factor 11 precursor                                              | LESIK                  | a                        |
| IPi00023751       | Growth/differentiation factor 8 precursor                                               | EGLCNACTWR             | a                        |
| IPi00015130       | Growth-arrest-specific protein 2                                                        | ISEDPPCK               | a                        |
| IPi00015130       | Growth-arrest-specific protein 2                                                        | KSTGNLLDDAVK           | a                        |
| IPi00015130       | Growth-arrest-specific protein 2                                                        | SGPGLSDMHQYSQWLA       | a                        |
| IPi00515024       | GTP binding protein 2                                                                   | XQGGGAR                | e                        |
| IPi00465256       | GTP-AMP phosphotransferase mitochondrial                                                | AFDQGK                 | c                        |
| IPi00465256       | GTP-AMP phosphotransferase mitochondrial                                                | NLTQYSWLLDGFPR         | d; e                     |
| IPi00465256       | GTP-AMP phosphotransferase mitochondrial                                                | TVGDDDLTGEPLQQR        | d                        |
| IPi00643041       | GTP-binding nuclear protein Ran                                                         | FNWDTAGQEK             | c; d                     |
| IPi00643041       | GTP-binding nuclear protein Ran                                                         | HLTGEFEK               | d                        |
| IPi00643041       | GTP-binding nuclear protein Ran                                                         | NLQYVDISAK             | c; d                     |
| IPi00643041       | GTP-binding nuclear protein Ran                                                         | VCENIPVLCGK            | d                        |
| IPi00644409       | Guanine deaminase                                                                       | DHLLGVSDSGK            | d                        |
| IPi00644409       | Guanine deaminase                                                                       | EFDAILLNPK             | d                        |
| IPi00644409       | Guanine deaminase                                                                       | FLYLGDPR               | d                        |
| IPi00465184       | Guanine deaminase                                                                       | FQNDFAEEVYTR           | d                        |
| IPi00644409       | Guanine deaminase                                                                       | FVSEMLQK               | d                        |
| IPi00644409       | Guanine deaminase                                                                       | NIEEYVGGK              | d                        |
| IPi00644409       | Guanine deaminase                                                                       | NYTSVYDK               | d                        |
| IPi00644932       | Guanine deaminase                                                                       | QVVPFSSV               | c                        |
| IPi00644409       | Guanine deaminase                                                                       | VCMDLNDTFPEYK          | d                        |
| IPi00644409       | Guanine deaminase                                                                       | YTFPAEHR               | d                        |
| IPi00639998       | Guanine nucleotide binding protein                                                      | ACADATLSQITNNIDPVGR    | d; e                     |
| IPi00639998       | Guanine nucleotide binding protein                                                      | IYAMHWGTDNR            | c; d; e                  |
| IPi00514067       | Guanine nucleotide binding protein                                                      | LVYQNIFTAMQAMIR        | d                        |
| IPi00514067       | Guanine nucleotide binding protein                                                      | VADPAVLLPTQDDVLR       | d; e                     |
| IPi00514067       | Guanine nucleotide binding protein                                                      | VSFAFENYVDAIK          | d                        |
| IPi00328744       | Guanine nucleotide binding protein (G)                                                  | CLLPAEAGGARERR         | a                        |
| IPi00328744       | Guanine nucleotide binding protein (G)                                                  | DTILQENLK              | a                        |
| IPi00328744       | Guanine nucleotide binding protein (G)                                                  | KIPFKMVDVGGQR          | a                        |
| IPi00748145       | guanine nucleotide binding protein (G protein), alpha inhibiting activity polypeptide 2 | IAQSDYIPTQDDVLR        | c; d; e                  |
| IPi00748145       | guanine nucleotide binding protein (G protein), alpha inhibiting activity polypeptide 2 | MPFDVGGQR              | d                        |
| IPi00288947       | Guanine nucleotide binding protein (G protein), q polypeptide                           | VPTTGHEYPFDLQSVIFR     | d; e                     |
| IPi00095891       | guanine nucleotide binding protein, alpha stimulating activity polypeptide 1 isoform c  | IEDYFPEFAR             | e                        |
| IPi00095891       | guanine nucleotide binding protein, alpha stimulating activity polypeptide 1 isoform c  | QYELL                  | e                        |
| IPi00095891       | guanine nucleotide binding protein, alpha stimulating activity polypeptide 1 isoform c  | YTPPEDATPEPGEPR        | c; d                     |
| IPi00412782       | Guanine nucleotide exchange factor GEF-H1                                               | DLLVGGVVELLTPR         | d; e                     |
| IPi00412782       | Guanine nucleotide exchange factor GEF-H1                                               | QLAALGQTEPLPAEAPWAR    | e                        |
| IPi00290928       | Guanine nucleotide-binding protein alpha-13 subunit                                     | VFLQLYPAIR             | d; e                     |
| IPi00470619       | Guanine nucleotide-binding protein G(I)/G(S)/G(O) gamma-2 subunit precursor             | EDPLLTPVASENPF         | c; d                     |
| IPi00470619       | Guanine nucleotide-binding protein G(I)/G(S)/G(O) gamma-2 subunit precursor             | LVEQLK                 | d                        |
| IPi0030058        | Guanine nucleotide-binding protein G(I)/G(S)/G(O) gamma-4 subunit precursor             | EDPLLTPVASENPF         | d; e                     |
| IPi0028509        | Guanine nucleotide-binding protein G(I)/G(S)/G(O) gamma-7 subunit precursor             | KLVEQLR                | c                        |
| IPi00026268       | Guanine nucleotide-binding protein G(I)/G(S)/G(T) beta subunit 1                        | LIWDSYTTNK             | c; d; e                  |
| IPi00026268       | Guanine nucleotide-binding protein G(I)/G(S)/G(T) beta subunit 1                        | LLVSASQDK              | d                        |
| IPi00026268       | Guanine nucleotide-binding protein G(I)/G(S)/G(T) beta subunit 1                        | LWVDYR                 | d                        |
| IPi00026268       | Guanine nucleotide-binding protein G(I)/G(S)/G(T) beta subunit 1                        | VSLCGVTDGMAVATGSWDSFLK | d; e                     |
| IPi0003348        | Guanine nucleotide-binding protein G(I)/G(S)/G(T) beta subunit 2                        | ACGDSTLITQITAGLDPVGR   | e                        |
| IPi0003348        | Guanine nucleotide-binding protein G(I)/G(S)/G(T) beta subunit 2                        | QEAQLR                 | d; e                     |
| IPi00029143       | Guanine nucleotide-binding protein G(I)/G(S)/G(T) beta subunit 3                        | QEAQLK                 | c                        |
| IPi00220578       | Guanine nucleotide-binding protein G(k), alpha subunit                                  | ISQSNYIPTQDDVLR        | e                        |
| IPi00220281       | Guanine nucleotide-binding protein G(o), alpha subunit 1                                | DLFGEK                 | d; e                     |
| IPi00220281       | Guanine nucleotide-binding protein G(o), alpha subunit 1                                | MEDTEPFAELLSAMMR       | c; d; e                  |
| IPi00220281       | Guanine nucleotide-binding protein G(o), alpha subunit 1                                | QYKPVVYSNTIQSLAIVR     | d; e                     |
| IPi00220281       | Guanine nucleotide-binding protein G(o), alpha subunit 1                                | STIVK                  | d                        |
| IPi00398700       | Guanine nucleotide-binding protein G(o), alpha subunit 2                                | AMDTLGEYGDK            | d                        |
| IPi00398700       | Guanine nucleotide-binding protein G(o), alpha subunit 2                                | AMDTLGEYGDKER          | c; d; e                  |
| IPi00398700       | Guanine nucleotide-binding protein G(o), alpha subunit 2                                | EDGISAAC               | d                        |
| IPi00398700       | Guanine nucleotide-binding protein G(o), alpha subunit 2                                | EYQLNSAK               | c; d                     |
| IPi00398700       | Guanine nucleotide-binding protein G(o), alpha subunit 2                                | IGAADYQTEQDILR         | c; d; e; f               |
| IPi00398700       | Guanine nucleotide-binding protein G(o), alpha subunit 2                                | IHHEDGFSGEDVK          | c; d; e                  |
| IPi00398700       | Guanine nucleotide-binding protein G(o), alpha subunit 2                                | LFDSICNNK              | e                        |
| IPi00398700       | Guanine nucleotide-binding protein G(o), alpha subunit 2                                | LFVGGQR                | c; d; e                  |
| IPi00398700       | Guanine nucleotide-binding protein G(o), alpha subunit 2                                | LLLLGAGESGK            | c; d; e                  |
| IPi00398700       | Guanine nucleotide-binding protein G(o), alpha subunit 2                                | LWGDGIECFNR            | c; d; e                  |
| IPi00398700       | Guanine nucleotide-binding protein G(o), alpha subunit 2                                | MVCDVYSR               | d                        |
| IPi00398700       | Guanine nucleotide-binding protein G(o), alpha subunit 2                                | NLKEDGISAAC            | d                        |
| IPi00398700       | Guanine nucleotide-binding protein G(o), alpha subunit 2                                | TTGIVETHFTFK           | d                        |
| IPi00398700       | Guanine nucleotide-binding protein G(o), alpha subunit 2                                | YYLDSLDR               | c; d; e                  |
| IPi00328128       | Guanine nucleotide-binding protein G(z), alpha subunit                                  | IAAADYPTVEDILR         | d; e                     |
| IPi00004379       | H6 homeodomain protein                                                                  | DPGRR                  | c                        |
| IPi000202043      | Hamartin                                                                                | DIQMWK                 | a                        |
| IPi000202043      | Hamartin                                                                                | ELSETTAAEAPVPR         | a                        |
| IPi000202043      | Hamartin                                                                                | LPLPSK                 | a                        |
| IPi000202043      | Hamartin                                                                                | NMIAELRIELK            | a                        |
| IPi000202043      | Hamartin                                                                                | QHHLNDRGSEPPGSK        | a                        |
| IPi000202043      | Hamartin                                                                                | SHYSMKENLETFEEVVK      | a                        |
| IPi00641737       | Haptoglobin precursor                                                                   | FTDHLK                 | c; d                     |
| IPi00641737       | Haptoglobin precursor                                                                   | GSPFWQAK               | c; d                     |
| IPi00641737       | Haptoglobin precursor                                                                   | ILGGHLDK               | c; d                     |

| IPI Accession No. | Protein Description                  | Peptide Sequence*                  | Primary Source Dataset** |
|-------------------|--------------------------------------|------------------------------------|--------------------------|
| IP100641737       | Haptoglobin precursor                | QWINK                              | c; d                     |
| IP100478493       | Haptoglobin precursor                | TEGDGVYTLNDK                       | a                        |
| IP100478493       | Haptoglobin precursor                | TEGDGVYTLNNEK                      | a; c; d; g               |
| IP100641737       | Haptoglobin precursor                | VGYVSGWGR                          | d                        |
| IP100641737       | Haptoglobin precursor                | VYSIQDWVQK                         | c                        |
| IP100641737       | Haptoglobin precursor                | YYMLPVADQDCIR                      | c; d                     |
| IP100289890       | HCGV protein                         | EKLAEPGARAGR                       | a                        |
| IP100289890       | HCGV protein                         | SSSEDDLPEDFPVYK                    | a                        |
| IP100384863       | HDCMB21P                             | DLISHDEMFSDIYK                     | d                        |
| IP100513743       | Heat shock 105kDa protein 1          | LYQECEK                            | d                        |
| IP100513743       | Heat shock 105kDa protein 1          | MFEELGQR                           | d                        |
| IP100513743       | Heat shock 105kDa protein 1          | NAVEEYVYEFK                        | d                        |
| IP100513743       | Heat shock 105kDa protein 1          | SVLDAAQVGLNCLR                     | d                        |
| IP100304925       | Heat shock 70 kDa protein 1          | LVNHFVEEFK                         | d                        |
| IP100304925       | Heat shock 70 kDa protein 1          | SINPDEAVAYGAAVQAAILMGDK            | d                        |
| IP100002966       | Heat shock 70 kDa protein 4          | AESEMETSQAGSK                      | d                        |
| IP100002966       | Heat shock 70 kDa protein 4          | AGGETIANEYSDR                      | d                        |
| IP100002966       | Heat shock 70 kDa protein 4          | EFSITDVVPYISLR                     | c; d; e                  |
| IP100002966       | Heat shock 70 kDa protein 4          | FLEMCDLLAR                         | d                        |
| IP100002966       | Heat shock 70 kDa protein 4          | QVYVDK                             | c                        |
| IP100002966       | Heat shock 70 kDa protein 4          | TSTVDLPIENQLWQIDR                  | d                        |
| IP100295485       | Heat shock 70 kDa protein 4L         | DISTTLNADEAVAR                     | c; d                     |
| IP100295485       | Heat shock 70 kDa protein 4L         | NAVEEYVYDFK                        | e                        |
| IP100514377       | heat shock 70kDa protein 1A          | AEDEVQR                            | d                        |
| IP100514377       | heat shock 70kDa protein 1A          | AFYPEISSMVLTK                      | c; d                     |
| IP100514377       | heat shock 70kDa protein 1A          | AQHIDLVLVGGSTR                     | d                        |
| IP100514377       | heat shock 70kDa protein 1A          | ATAGDTHLGGEDFDNR                   | d; e                     |
| IP100514377       | heat shock 70kDa protein 1A          | DAGVIAGLNVLR                       | c; d; e                  |
| IP100514377       | heat shock 70kDa protein 1A          | DISQNK                             | d                        |
| IP100514377       | heat shock 70kDa protein 1A          | FEELCSDLFR                         | d; e                     |
| IP100514377       | heat shock 70kDa protein 1A          | FGDPVYQSDMK                        | c                        |
| IP100514377       | heat shock 70kDa protein 1A          | GGSGSGPTIEVD                       | c; d                     |
| IP100514377       | heat shock 70kDa protein 1A          | IINEPTAAAIAYGLDR                   | c; d; e                  |
| IP100514377       | heat shock 70kDa protein 1A          | NALESYAFNMK                        | c; d                     |
| IP100514377       | heat shock 70kDa protein 1A          | QTQIFTTYSDNQPGLVQYVEGER            | d                        |
| IP100514377       | heat shock 70kDa protein 1A          | SAVEDEGLK                          | d                        |
| IP100514377       | heat shock 70kDa protein 1A          | STLEPVEK                           | c                        |
| IP100514377       | heat shock 70kDa protein 1A          | YKAEDEVQR                          | c; d                     |
| IP100031022       | heat shock 70kDa protein 4 isoform b | NTVQGEK                            | c                        |
| IP100472102       | Heat shock protein 60                | APGFGDNR                           | d; e                     |
| IP100472102       | Heat shock protein 60                | CEFDAYVLLSEK                       | b; d; e                  |
| IP100472102       | Heat shock protein 60                | DPGMGAMGGMGGMGGMF                  | d                        |
| IP100472102       | Heat shock protein 60                | GIDPTK                             | d                        |
| IP100472102       | Heat shock protein 60                | GYISPYFINTSK                       | c; d; e                  |
| IP100472102       | Heat shock protein 60                | IGIEIK                             | d                        |
| IP100472102       | Heat shock protein 60                | IQEHQLDVTTSEYK                     | d                        |
| IP100472102       | Heat shock protein 60                | ISSIQSIVPALEIANHR                  | d; e                     |
| IP100472102       | Heat shock protein 60                | LSDGVAVLK                          | d                        |
| IP100472102       | Heat shock protein 60                | LVQDVANNTEEAGDGTITATVLAR           | c; d; e                  |
| IP100472102       | Heat shock protein 60                | NAGVEGSLIVEK                       | d                        |
| IP100472102       | Heat shock protein 60                | TLNDELEHIEGMIK                     | c; d; e                  |
| IP100472102       | Heat shock protein 60                | TVIEQSWGSPK                        | d                        |
| IP100472102       | Heat shock protein 60                | VGEVIVTK                           | d                        |
| IP100472102       | Heat shock protein 60                | VGGTSDVEVNEK                       | c; d; e                  |
| IP100472102       | Heat shock protein 60                | VGLQVVAVK                          | d; e                     |
| IP100472102       | Heat shock protein 60                | YTDALNATR                          | d                        |
| IP100555565       | Heat shock protein 90Bd              | NPDDITQECCGEFYK                    | d                        |
| IP100556482       | Heat shock protein 94c               | EFGTNIK                            | d                        |
| IP100382470       | Heat shock protein HSP 90-alpha 2    | AEADKNDK                           | c; d                     |
| IP100382470       | Heat shock protein HSP 90-alpha 2    | ALLFVPR                            | c; d                     |
| IP100382470       | Heat shock protein HSP 90-alpha 2    | DNSTMGYMAAK                        | d                        |
| IP100382470       | Heat shock protein HSP 90-alpha 2    | DQVANSAFYER                        | c; d; e                  |
| IP100382470       | Heat shock protein HSP 90-alpha 2    | EDQTEYLEER                         | c; d                     |
| IP100382470       | Heat shock protein HSP 90-alpha 2    | EFEK                               | c; d; e                  |
| IP100382470       | Heat shock protein HSP 90-alpha 2    | EGLELPEDEEEKK                      | d                        |
| IP100382470       | Heat shock protein HSP 90-alpha 2    | EMLQSK                             | c; d; e                  |
| IP100382470       | Heat shock protein HSP 90-alpha 2    | FENLCK                             | c; d                     |
| IP100382470       | Heat shock protein HSP 90-alpha 2    | FYEQFSK                            | c; d; e                  |
| IP100382470       | Heat shock protein HSP 90-alpha 2    | HLEINPDHSHIETLR                    | d                        |
| IP100382470       | Heat shock protein HSP 90-alpha 2    | LGLGIDEDDPTADDTSAAVTEEMPPLEGDDDTSR | c; d                     |
| IP100382470       | Heat shock protein HSP 90-alpha 2    | MKENQK                             | c; d                     |
| IP100382470       | Heat shock protein HSP 90-alpha 2    | NPDDITNEEYGEFYK                    | c; d; e                  |
| IP100382470       | Heat shock protein HSP 90-alpha 2    | TDTGEPMGR                          | c; d                     |
| IP100382470       | Heat shock protein HSP 90-alpha 2    | VILHLK                             | d                        |
| IP100382470       | Heat shock protein HSP 90-alpha 2    | YIDQELNK                           | c; d; e                  |
| IP100382470       | Heat shock protein HSP 90-alpha 2    | YYTSASGDEMYSLK                     | d                        |
| IP100414676       | Heat shock protein HSP 90-beta       | ADLNLNGTIAK                        | d                        |
| IP100414676       | Heat shock protein HSP 90-beta       | ALLFPR                             | d; e                     |
| IP100414676       | Heat shock protein HSP 90-beta       | EGLELPEDEEEKK                      | d                        |
| IP100414676       | Heat shock protein HSP 90-beta       | EIFLR                              | d                        |
| IP100414676       | Heat shock protein HSP 90-beta       | EQVANSAFYER                        | d; e                     |
| IP100414676       | Heat shock protein HSP 90-beta       | FYEAFSK                            | d; e                     |
| IP100414676       | Heat shock protein HSP 90-beta       | GVVSDLPNLISR                       | c; d; e                  |
| IP100414676       | Heat shock protein HSP 90-beta       | IDIPNPQER                          | c; d; e                  |
| IP100414676       | Heat shock protein HSP 90-beta       | LDSGK                              | c                        |
| IP100414676       | Heat shock protein HSP 90-beta       | LGLGIDEDVEAAEENPAAVPDEIPPLEGDEDSAR | d; e                     |
| IP100414676       | Heat shock protein HSP 90-beta       | ISELLR                             | d; e                     |
| IP100414676       | Heat shock protein HSP 90-beta       | NPDDITQEEYGEFYK                    | c; d; e                  |
| IP100414676       | Heat shock protein HSP 90-beta       | YESLTDPSK                          | d                        |
| IP100007702       | Heat shock-related 70 kDa protein 2  | CQEVINWLDK                         | b; c; d; e               |
| IP100007702       | Heat shock-related 70 kDa protein 2  | DAGTTIGLNVLR                       | e                        |
| IP100007702       | Heat shock-related 70 kDa protein 2  | EIAEAYLGGK                         | c                        |
| IP100007702       | Heat shock-related 70 kDa protein 2  | FDLTGIPPAPR                        | e                        |
| IP100007702       | Heat shock-related 70 kDa protein 2  | GQIQEIVLVGGSTR                     | c; d; e                  |
| IP100007702       | Heat shock-related 70 kDa protein 2  | GTLEPVEK                           | c                        |
| IP100007702       | Heat shock-related 70 kDa protein 2  | HWPFR                              | c                        |
| IP100007702       | Heat shock-related 70 kDa protein 2  | KFEDATVQSDMK                       | e                        |

| IPI Accession No. | Protein Description                                  | Peptide Sequence*      | Primary Source Dataset** |
|-------------------|------------------------------------------------------|------------------------|--------------------------|
| IP10007702        | Heat shock-related 70 kDa protein 2                  | LYQGGPGGGGGGASGGPTIEVD | ce e                     |
| IP10007702        | Heat shock-related 70 kDa protein 2                  | MVQEAER                | c                        |
| IP10007702        | Heat shock-related 70 kDa protein 2                  | STAGDTHLGGEDFDNR       | ce; d; e                 |
| IP10007702        | Heat shock-related 70 kDa protein 2                  | TFFPEISSMVLTK          | ce; d                    |
| IP10007702        | Heat shock-related 70 kDa protein 2                  | VHSAVITVPAYFNDSQR      | d                        |
| IP10007702        | Heat shock-related 70 kDa protein 2                  | VVSEGGKPK              | c                        |
| IP100025512       | Heat-shock protein beta-1                            | LATQSNITIPVFESR        | de; e                    |
| IP100025512       | Heat-shock protein beta-1                            | LFQAFGLFR              | de; e                    |
| IP100025512       | Heat-shock protein beta-1                            | QDEHGYSR               | c                        |
| IP100012491       | Heat-stable enterotoxin receptor                     | DYELRQK                | a                        |
| IP100012491       | Heat-stable enterotoxin receptor                     | FYGTVK                 | a                        |
| IP100168877       | Helicase B                                           | AGSLPGCLR              | a                        |
| IP100168877       | Helicase B                                           | SCVFPYDLYHAER          | a                        |
| IP100168877       | Helicase B                                           | VFGRFPTGAWWRVK         | a                        |
| IP100414819       | Helicase SKI2W                                       | TVVDFSMRK              | a                        |
| IP100026156       | Hematopoietic lineage cell specific protein          | DRVDSKAVGFNEMAPT       | a                        |
| IP100026156       | Hematopoietic lineage cell specific protein          | GFGGQYGIQK             | a                        |
| IP100026156       | Hematopoietic lineage cell specific protein          | GLKAKFESMAEEK          | a                        |
| IP100026156       | Hematopoietic lineage cell specific protein          | KKEMESGPK              | a                        |
| IP100148063       | Heme-binding protein 1                               | GDKEVAYEER             | c                        |
| IP100045512       | Hemicentin                                           | GDLWGPGLSPK            | a                        |
| IP100045512       | Hemicentin                                           | GELISTSSAK             | a                        |
| IP100045512       | Hemicentin                                           | LMVVQSELLVALGDTVM      | a                        |
| IP100045512       | Hemicentin                                           | SCGRGNQTR              | a                        |
| IP100045512       | Hemicentin                                           | SLGSAMR                | a                        |
| IP100045512       | Hemicentin                                           | VQLTVYVPR              | a                        |
| IP100045512       | Hemicentin                                           | YLCMATNAAGDTRR         | a                        |
| IP100410714       | Hemoglobin alpha subunit                             | AAWVK                  | c                        |
| IP100410714       | Hemoglobin alpha subunit                             | FLASVSTVLTSK           | d                        |
| IP100410714       | Hemoglobin alpha subunit                             | MPLSFPTTK              | ce; d; e                 |
| IP100410714       | Hemoglobin alpha subunit                             | TYFPHFDLSBGSQVK        | d                        |
| IP100410714       | Hemoglobin alpha subunit                             | VDPVNFK                | ce; d; e                 |
| IP100410714       | Hemoglobin alpha subunit                             | YGAAHAGEYGAALER        | ce; d; e                 |
| IP100410714       | Hemoglobin alpha subunit                             | VLSPADK                | ce; d; e                 |
| IP100654755       | Hemoglobin beta subunit                              | EFTPPVQAAYQK           | ce; d                    |
| IP100654755       | Hemoglobin beta subunit                              | FFESFGDLSTPDVVMGNPK    | ce; d; e; g              |
| IP100654755       | Hemoglobin beta subunit                              | GTATLSELHCDK           | ce; d; e; f; g           |
| IP100654755       | Hemoglobin beta subunit                              | LHVDPENFR              | ce; d; e; f              |
| IP100654755       | Hemoglobin beta subunit                              | SAVTALWVK              | ce; d; e; f; g           |
| IP100654755       | Hemoglobin beta subunit                              | VHILTPEEK              | ce; d                    |
| IP100654755       | Hemoglobin beta subunit                              | VLGAFSDGLAHLNLIK       | de; e; f; g              |
| IP100654755       | Hemoglobin beta subunit                              | VNVDEVGGEALGR          | ce; d; e; g              |
| IP100654755       | Hemoglobin beta subunit                              | VVAGVANALAIHK          | ce; d; e; f; g           |
| IP100473011       | Hemoglobin delta subunit                             | EFTPQMQAAYQK           | ce; d                    |
| IP100473011       | Hemoglobin delta subunit                             | GTFSQLSELHCDK          | ce; d                    |
| IP100473011       | Hemoglobin delta subunit                             | VNVDAVGGEALGR          | d                        |
| IP100464992       | Hemoglobin gamma-G                                   | MVTGVASALSSR           | a                        |
| IP100022488       | Hemopexin precursor                                  | LWVLDLK                | d                        |
| IP100012948       | Heparin-binding EGF-like growth factor               | DLQEAIDLRLR            | a                        |
| IP100167215       | hepatocyte cell adhesion molecule                    | DKDSPETEENPAPEPR       | d                        |
| IP100167215       | hepatocyte cell adhesion molecule                    | EQDEAGPVEISA           | e                        |
| IP100167215       | hepatocyte cell adhesion molecule                    | SATEPFGPGYSVSPAVPGR    | ce; d; e                 |
| IP100031773       | Hepatocyte nuclear factor 3-beta                     | MLGAVK                 | e                        |
| IP100514127       | Hepatoma-derived growth factor                       | ASGVQSSQK              | ce; d                    |
| IP100514127       | Hepatoma-derived growth factor                       | DLFPYEESK              | ce; d                    |
| IP100514127       | Hepatoma-derived growth factor                       | EAENPEGEEK             | c                        |
| IP100020956       | Hepatoma-derived growth factor                       | GYPHWPAR               | d                        |
| IP100419322       | Hepatoma-derived growth factor 2                     | GDSEALDEES             | a                        |
| IP100419322       | Hepatoma-derived growth factor 2                     | GPLGGRK                | a                        |
| IP100419322       | Hepatoma-derived growth factor 2                     | RGPLGGR                | a                        |
| IP100419322       | Hepatoma-derived growth factor 2                     | SSDSGLKRR              | a                        |
| IP10007063        | Hepatoma-derived growth factor-related protein 3     | SSSEGGDAGNDTR          | d                        |
| IP100432025       | HepHaestin isoform b                                 | VASSFLK                | a                        |
| IP100011913       | Heterogeneous nuclear ribonucleoprotein A0           | LFVGGK                 | d                        |
| IP100215965       | heterogeneous nuclear ribonucleoprotein A1 isoform b | DYFEQYK                | d                        |
| IP10027834        | heterogeneous nuclear ribonucleoprotein L isoform a  | TPASPVVHR              | d                        |
| IP10027834        | heterogeneous nuclear ribonucleoprotein L isoform a  | YVGGGSEGG              | d                        |
| IP100465225       | heterogeneous nuclear ribonucleoprotein L isoform b  | FSTPEQAQK              | d                        |
| IP100102864       | Hexokinase, type II                                  | EVLMR                  | a                        |
| IP100102864       | Hexokinase, type II                                  | RAAQLCGAGMAAVVDR       | a                        |
| IP100102864       | Hexokinase, type II                                  | SEDGSGKGAAMVTAVAY      | a                        |
| IP100014224       | HGC6.4 protein                                       | IAPGLLR                | a                        |
| IP100014224       | HGC6.4 protein                                       | RAVLGPDGR              | a                        |
| IP100014224       | HGC6.4 protein                                       | WSALSEGPCAPRAR         | a                        |
| IP100384770       | HGFL(S) protein                                      | QDVENQLKM              | a                        |
| IP100384770       | HGFL(S) protein                                      | RPCEDLR                | a                        |
| IP100384770       | HGFL(S) protein                                      | SEAAAVQPVGISQR         | a                        |
| IP100384770       | HGFL(S) protein                                      | VRMNSKEK               | a                        |
| IP100514765       | high mobility group AT-hook 2 isoform b              | AEATGK                 | c                        |
| IP100219097       | High mobility group protein B2                       | MSSYAFFVQTCR           | d                        |
| IP100219344       | Hippocalcin-like protein 1                           | FAEHVFR                | ce; d                    |
| IP100219344       | Hippocalcin-like protein 1                           | IYANFPYQDASK           | ce; e                    |
| IP100219344       | Hippocalcin-like protein 1                           | LLQCDPSSASQF           | c                        |
| IP100219344       | Hippocalcin-like protein 1                           | LSLEEFIR               | ce; d; e                 |
| IP100219344       | Hippocalcin-like protein 1                           | MPEDESTPEKR            | e                        |
| IP100219344       | Hippocalcin-like protein 1                           | QMDTNSDNGK             | d                        |
| IP100031425       | Histidine ammonia-lyase                              | TVVYGITTFGK            | a                        |
| IP100031425       | Histidine ammonia-lyase                              | VVEVAAPYIEK            | a                        |
| IP100239077       | Histidine triad nucleotide-binding protein 1         | AQVARPGGDTIFGK         | d                        |
| IP100239077       | Histidine triad nucleotide-binding protein 1         | IFEDDR                 | d                        |
| IP100000335       | Histidine triad nucleotide-binding protein 2         | DVAPQAPVHFLVIPK        | e                        |
| IP100000335       | Histidine triad nucleotide-binding protein 2         | SLPADILYEDQCLVFR       | d                        |
| IP100304324       | Histone deacetylase 11                               | DELVFRMVR              | a                        |
| IP100304324       | Histone deacetylase 11                               | EASEEDLLVVHTRR         | a                        |
| IP100304324       | Histone deacetylase 11                               | GWAINVGGGFHHCSSDR      | a                        |
| IP100304324       | Histone deacetylase 11                               | TQTGGTIMAGKLAVER       | a                        |
| IP100010088       | Histone deacetylase-4                                | LTLPALQQR              | a                        |

| IPI Accession No. | Protein Description                                    | Peptide Sequence*  | Primary Source Dataset** |
|-------------------|--------------------------------------------------------|--------------------|--------------------------|
| IP100010088       | Histone deacetylase 4                                  | NLNHCISDPR         | a                        |
| IP1000217466      | Histone H1.3                                           | ALAAAGYDVEK        | cr; d                    |
| IP1000217467      | Histone H1.4                                           | KPAGAAK            | c                        |
| IP100021924       | Histone H1x                                            | IYTEAK             | d                        |
| IP1000219037      | Histone H2A.x                                          | ATQASQEY           | d                        |
| IP100018534       | Histone H2B.c                                          | AMGMNSFVDFIER      | d                        |
| IP100018534       | Histone H2B.c                                          | HAYSEGTK           | d                        |
| IP100455473       | Histone H4                                             | DNIGGITKPAIR       | d                        |
| IP100455473       | Histone H4                                             | ISGLIVEETR         | d                        |
| IP100455473       | Histone H4                                             | TLYGFGG            | d; e                     |
| IP100455473       | Histone H4                                             | VFLENVIR           | d                        |
| IP100472605       | HLA class I histocompatibility antigen.                | LQRAEHPKTHVTHHPVS  | a                        |
| IP100004672       | HLA class I histocompatibility antigen.                | SWTAADMAAQITK      | a                        |
| IP100472867       | HLA class I histocompatibility antigen.                | TYLEGTCTVEWLR      | a                        |
| IP100472612       | HLA-C protein                                          | AYLEGLCVEWLR       | a                        |
| IP100472612       | HLA-C protein                                          | GYYNQSEARSHIQK     | a                        |
| IP100164426       | HLA1-3TM                                               | AGAGPK             | d                        |
| IP100386441       | HLC-2                                                  | FLPDEAR            | e                        |
| IP100744226       | HMG-1 and HMG-Y, DNA-binding domain containing protein | EEAGRR             | c                        |
| IP100402391       | HNRPUL1 protein                                        | KRPYEENR           | a                        |
| IP100402391       | HNRPUL1 protein                                        | RPYEENR            | a                        |
| IP100402391       | HNRPUL1 protein                                        | SKAECEILMVGPAAGK   | a                        |
| IP100402391       | HNRPUL1 protein                                        | TDEEGK             | a                        |
| IP100402391       | HNRPUL1 protein                                        | VCFEMK             | a                        |
| IP100022370       | Homeobox protein Cux-2                                 | EPFIR              | a                        |
| IP100022370       | Homeobox protein Cux-2                                 | LMMPPAAFK          | a                        |
| IP100022370       | Homeobox protein Cux-2                                 | MANLNNIYRLER       | a                        |
| IP100022370       | Homeobox protein Cux-2                                 | SILEQARR           | a                        |
| IP100026305       | Hook homolog 1                                         | DEDMKAMEER         | a                        |
| IP100026305       | Hook homolog 1                                         | ETNEELR            | a                        |
| IP100026305       | Hook homolog 1                                         | LEAHMEK            | a                        |
| IP100026305       | Hook homolog 1                                         | LIVSAWYK           | a                        |
| IP100026305       | Hook homolog 1                                         | LLQLJLGCAINCEKK    | a                        |
| IP100026305       | Hook homolog 1                                         | MEETQPPQPK         | a                        |
| IP100031768       | Hook homolog 3                                         | CELEK              | a                        |
| IP100031768       | Hook homolog 3                                         | ETHEELR            | a                        |
| IP100031768       | Hook homolog 3                                         | LASTGSGQFLAR       | a                        |
| IP100031768       | Hook homolog 3                                         | LFHSLK             | a                        |
| IP100031768       | Hook homolog 3                                         | TERDSLK            | a                        |
| IP100032826       | Hsc70-interacting protein                              | AIENPDSAQPKWRGK    | a                        |
| IP100032826       | Hsc70-interacting protein                              | LDYDEASAMLEKQPR    | a                        |
| IP100032826       | Hsc70-interacting protein                              | MCRQDPSVLHTEEMR    | a                        |
| IP100418445       | HSD-34                                                 | ELQTLRNMOK         | a                        |
| IP100604607       | Hsp89-alpha-delta-N                                    | IHYITIGETK         | cr; d                    |
| IP100013122       | Hsp90 co-chaperone Cdc37                               | ELEVAEGGK          | d                        |
| IP100013122       | Hsp90 co-chaperone Cdc37                               | EYEEER             | d                        |
| IP100023025       | HSPC048                                                | AGEAVPPR           | d                        |
| IP100023026       | HSPC049                                                | EEQQPEEEALVQHK     | a                        |
| IP100023026       | HSPC049                                                | HLHFK              | a                        |
| IP100023026       | HSPC049                                                | QVQVPR             | a                        |
| IP100100810       | HSPC051                                                | LYSLFR             | d; e                     |
| IP100050689       | HSPC117 protein                                        | LADMGIAR           | c                        |
| IP100008998       | HSPC121                                                | WLDESDAEMELR       | e                        |
| IP100478097       | HU-K4                                                  | AFLLSLAALR         | e                        |
| IP100478097       | HU-K4                                                  | SQLEAIFLR          | e                        |
| IP100002335       | Huntingtin                                             | KGSEASAASR         | a                        |
| IP100002335       | Huntingtin                                             | LGMENR             | a                        |
| IP100002335       | Huntingtin                                             | MATLEK             | a                        |
| IP100002335       | Huntingtin                                             | SSHLPFR            | a                        |
| IP100002335       | Huntingtin                                             | VLLKAFIANLKSSSPTR  | a                        |
| IP100002335       | Huntingtin                                             | RQEIESDESDELQDR    | a                        |
| IP100307733       | Huntingtin interacting protein 1                       | TARDPEGKIYYHVTR    | a                        |
| IP100024417       | Huntingtin interacting protein 1 related               | CTSSPDYLSR         | a                        |
| IP100024417       | Huntingtin interacting protein 1 related               | FHEQFHSLRNFR       | a                        |
| IP100024417       | Huntingtin interacting protein 1 related               | IEDMMNQR           | a                        |
| IP100024417       | Huntingtin interacting protein 1 related               | TLEAERMIR          | a                        |
| IP100021370       | huntingtin interacting protein 2                       | GEIAGPPDTPYEGGR    | d; e                     |
| IP100021370       | huntingtin interacting protein 2                       | VDLVNDFTELK        | d; e                     |
| IP100023601       | Hyaluronan and proteoglycan link protein 1 precursor   | YGFIAAWK           | d                        |
| IP100644966       | Hyaluronan and proteoglycan link protein 2             | GYGPLGGR           | d                        |
| IP100644966       | Hyaluronan and proteoglycan link protein 2             | YQFNYYEAK          | d; e                     |
| IP100029184       | Hyaluronan and proteoglycan link protein 2 precursor   | YPVLTAR            | e                        |
| IP100745553       | Hydroxyacylglutathione hydrolase                       | EKQDFK             | c                        |
| IP100745553       | Hydroxyacylglutathione hydrolase                       | TVQQHAGETDPVTMTR   | c                        |
| IP100170503       | Hypothetical protein                                   | ADFYVLEK           | a                        |
| IP100025409       | Hypothetical protein                                   | AIAIVCGSR          | a                        |
| IP100439948       | Hypothetical protein                                   | AQDDLTLR           | a                        |
| IP100299702       | Hypothetical protein                                   | AVLTLTEACATHEMESML | a                        |
| IP100003362       | Hypothetical protein                                   | DNHLLGTFIDLGIAPPAR | cr; d; e                 |
| IP100450358       | Hypothetical protein                                   | DDPHEGSR           | a                        |
| IP100329547       | Hypothetical protein                                   | DSRDMR             | a                        |
| IP100418523       | Hypothetical protein                                   | DTFLGLVLKQMYIMYVRN | a                        |
| IP100329547       | Hypothetical protein                                   | DWEDKDK            | a                        |
| IP100329547       | Hypothetical protein                                   | DYSRDTKESR         | a                        |
| IP100418523       | Hypothetical protein                                   | EAARSDFEFGSPASR    | a                        |
| IP100218107       | Hypothetical protein                                   | EAPVVAR            | a                        |
| IP100083708       | Hypothetical protein                                   | ECELEK             | a                        |
| IP100329547       | Hypothetical protein                                   | EKTKSLEITGER       | a                        |
| IP100025409       | Hypothetical protein                                   | ELSDLK             | a                        |
| IP100170503       | Hypothetical protein                                   | EPENALDK           | a                        |
| IP100419844       | Hypothetical protein                                   | EREPEAASSRGSVPR    | a                        |
| IP100419844       | Hypothetical protein                                   | EVDESEPEREVRK      | a                        |
| IP100003362       | Hypothetical protein                                   | FEELNMDLFR         | d; e                     |
| IP100645045       | Hypothetical protein                                   | FSEDVSVLSGGQTATR   | c                        |
| IP100299702       | Hypothetical protein                                   | FTFPFAGESLR        | a                        |
| IP100032575       | Hypothetical protein                                   | FYLQNR             | d                        |
| IP100029372       | Hypothetical protein                                   | GDFDLQIAK          | a                        |

| IPI Accession No. | Protein Description                           | Peptide Sequence*    | Primary Source Dataset** |
|-------------------|-----------------------------------------------|----------------------|--------------------------|
| IP10047072        | Hypothetical protein                          | GRRTWDLASLGR         | a                        |
| IP100419844       | Hypothetical protein                          | GSPVRVRR             | a                        |
| IP100003362       | Hypothetical protein                          | IEWLESHQDADIEDFK     | d                        |
| IP100439948       | Hypothetical protein                          | IPMPSSPQPR           | a                        |
| IP100003362       | Hypothetical protein                          | ITPSYVAFTEGER        | d; e                     |
| IP100032575       | Hypothetical protein                          | IYEKDEEK             | d                        |
| IP100029372       | Hypothetical protein                          | KTLANKLHQMER         | a                        |
| IP100299702       | Hypothetical protein                          | LEMEISARRR           | a                        |
| IP100025409       | Hypothetical protein                          | LVVSRASLVLPSVQHS     | a                        |
| IP100418525       | Hypothetical protein                          | NCVPVTLAMVERWK       | a                        |
| IP100056231       | Hypothetical protein                          | NLTDYLMK             | d; e                     |
| IP100003362       | Hypothetical protein                          | NQLTSNPENTVFDK       | d                        |
| IP100083708       | Hypothetical protein                          | QESNSCNK             | a                        |
| IP100328308       | Hypothetical protein                          | QTADK                | a                        |
| IP100025409       | Hypothetical protein                          | RAQSVR               | a                        |
| IP100439948       | Hypothetical protein                          | SDAGSVRR             | a                        |
| IP100473037       | Hypothetical protein                          | SFEQAASAFPEK         | a                        |
| IP100430808       | Hypothetical protein                          | SGTASVVCLLNNFYPR     | d                        |
| IP100083708       | Hypothetical protein                          | SLETQKTTAR           | a                        |
| IP100025409       | Hypothetical protein                          | SLFVNFTQAER          | a                        |
| IP100439948       | Hypothetical protein                          | SLGSAGPSGTLPRSQP     | a                        |
| IP100029372       | Hypothetical protein                          | SLPAVVR              | a                        |
| IP100003362       | Hypothetical protein                          | SOIFSTASDNQPTVTHK    | d                        |
| IP100025409       | Hypothetical protein                          | SSDPPRSATLDR         | a                        |
| IP10047072        | Hypothetical protein                          | TDQVLELGLVR          | a                        |
| IP100329547       | Hypothetical protein                          | TEIRNESRNSR          | a                        |
| IP100003362       | Hypothetical protein                          | TFAPEISAMVLTK        | d                        |
| IP100328308       | Hypothetical protein                          | TMIANPDWEK           | a                        |
| IP100029372       | Hypothetical protein                          | TMSCGNEFVETLKK       | a                        |
| IP100029372       | Hypothetical protein                          | TSDLKTPR             | a                        |
| IP100430808       | Hypothetical protein                          | TVAAPSVFIFPPSDEQLK   | c; e                     |
| IP100003362       | Hypothetical protein                          | TWNDPSVQQDIK         | c; d                     |
| IP100430808       | Hypothetical protein                          | YDNALQSGNSQESVTEQDSK | c; d                     |
| IP100439948       | Hypothetical protein                          | VLAIEIPRLK           | a                        |
| IP100003362       | Hypothetical protein                          | YTHAVVTPAYFNDAQR     | d                        |
| IP100166594       | Hypothetical protein (Fragment)               | DAGGPARGR            | d                        |
| IP100479966       | Hypothetical protein (Fragment)               | EFQDAGEQVSSPADVAEK   | e                        |
| IP100430771       | Hypothetical protein (Fragment)               | FNLWQDLPEIR          | e                        |
| IP100479966       | Hypothetical protein (Fragment)               | MGAVFMDAPVSGVGGAAR   | c                        |
| IP100009942       | Hypothetical protein (Fragment)               | RTQTLGAR             | c                        |
| IP100166740       | Hypothetical protein (Fragment)               | VAFLSPRR             | d                        |
| IP100005146       | Hypothetical protein A-362G6.1                | ILVSLATGASK          | a                        |
| IP100005146       | Hypothetical protein A-362G6.1                | MENEDVFEK            | a                        |
| IP100005146       | Hypothetical protein A-362G6.1                | MENEDVFEKK           | a                        |
| IP100005146       | Hypothetical protein A-362G6.1                | SLPYLVETAAAFDLQELK   | a                        |
| IP100005146       | Hypothetical protein A-362G6.1                | VKLAANFSLAPTTK       | a                        |
| IP100472116       | Hypothetical protein A-635H12.2               | DGNEEK               | a                        |
| IP100472116       | Hypothetical protein A-635H12.2               | LGGAARRGDVPINR       | a                        |
| IP100450215       | Hypothetical protein BT2.1                    | DRNSHYTCPR           | a                        |
| IP100006906       | Hypothetical protein C12orf4                  | DPAIMGLR             | a                        |
| IP100006906       | Hypothetical protein C12orf4                  | EALTFIEEESLSDYDR     | a                        |
| IP100006906       | Hypothetical protein C12orf4                  | ESVEAIGRIYEEQR       | a                        |
| IP100006906       | Hypothetical protein C12orf4                  | VMQELGK              | a                        |
| IP100024167       | Hypothetical protein C20orf6                  | DDEEQAQYR            | a                        |
| IP100024167       | Hypothetical protein C20orf6                  | ENDMEMEIK            | a                        |
| IP100024167       | Hypothetical protein C20orf6                  | REMQSVVQLMTR         | a                        |
| IP100046433       | Hypothetical protein C9orf126                 | NYPESYQLPR           | e                        |
| IP100472305       | Hypothetical protein CACNA2D1                 | GYYYEISGAIR          | e                        |
| IP100472305       | Hypothetical protein CACNA2D1                 | YYPASPVWVNSR         | c                        |
| IP100032799       | Hypothetical protein CGI-96                   | LCSPGLR              | a                        |
| IP100032799       | Hypothetical protein CGI-96                   | QRIELLR              | a                        |
| IP100032223       | Hypothetical protein DJ845O24.2               | ESY GADGTL CWSR      | a                        |
| IP100032223       | Hypothetical protein DJ845O24.2               | LILSHMDVSR           | a                        |
| IP100470889       | Hypothetical protein DKFZp313A047             | MQEADASIK            | d                        |
| IP100412862       | Hypothetical protein DKFZp434B0435            | ESKLTHYFOSFFNGK      | a                        |
| IP100412862       | Hypothetical protein DKFZp434B0435            | LLEDLDLK             | a                        |
| IP100418649       | Hypothetical protein DKFZp434B1917            | FQIEIK               | a                        |
| IP100098988       | Hypothetical protein DKFZp434C196             | ASLIGTPSR            | a                        |
| IP100098988       | Hypothetical protein DKFZp434C196             | SPSTASLTR            | a                        |
| IP100098988       | Hypothetical protein DKFZp434C196             | TLPRASLMRTPTTR       | a                        |
| IP100217802       | Hypothetical protein DKFZP434J0113            | DAMMKEK              | a                        |
| IP100217802       | Hypothetical protein DKFZP434J0113            | ETEASVK              | a                        |
| IP100217802       | Hypothetical protein DKFZP434J0113            | LPAA SPR             | a                        |
| IP100217802       | Hypothetical protein DKFZP434J0113            | REPEQLGEDVRR         | a                        |
| IP100217802       | Hypothetical protein DKFZP434J0113            | TEVASSSYAIEK         | a                        |
| IP100030274       | Hypothetical protein DKFZp434K1421            | ERYENNDK             | a                        |
| IP100470834       | Hypothetical protein DKFZp434N071             | ARYSMKIMPEEYSEFK     | a                        |
| IP100470834       | Hypothetical protein DKFZp434N071             | DPDILFMR             | a                        |
| IP100470834       | Hypothetical protein DKFZp434N071             | EPVMEGVNPFK          | a                        |
| IP100470834       | Hypothetical protein DKFZp434N071             | GIEPGLR              | a                        |
| IP1000031282      | Hypothetical protein DKFZp434O194             | ARAPETPLSR           | a                        |
| IP1000031282      | Hypothetical protein DKFZp434O194             | GYVLRQKLSQMMAAK      | a                        |
| IP1000031282      | Hypothetical protein DKFZp434O194             | NILVDEMIMHAR         | a                        |
| IP1000031282      | Hypothetical protein DKFZp434O194             | SGEPMVSMQAAEIR       | a                        |
| IP1000031282      | Hypothetical protein DKFZp434O194             | VSARTNKAR            | a                        |
| IP100019226       | Hypothetical protein DKFZp434P2326            | EPSAEIK              | a                        |
| IP100401676       | Hypothetical protein DKFZp451B1418            | EEGEEKKGK            | a                        |
| IP100401676       | Hypothetical protein DKFZp451B1418            | SLKEKCFVTQVACFLAK    | a                        |
| IP100177498       | Hypothetical protein DKFZp451D112             | LEQAGIK              | a                        |
| IP100177498       | Hypothetical protein DKFZp451D112             | SPVMTPPKFVWDPPEE     | a                        |
| IP100384975       | Hypothetical protein DKFZp451F1711            | EPFLR                | a                        |
| IP100384975       | Hypothetical protein DKFZp451F1711 (Fragment) | APESDTGDEDQDQER      | c; d; e                  |
| IP100395772       | Hypothetical protein DKFZp451J0218            | IAQLEEELEEEQGNTLINDR | e                        |
| IP100412957       | Hypothetical protein DKFZp451K165             | ANTSPPSPRSRSEQLVR    | a                        |
| IP100412957       | Hypothetical protein DKFZp451K165             | DSLNSGVPSGRQAEFS     | a                        |
| IP100412957       | Hypothetical protein DKFZp451K165             | EEKLTTR              | a                        |
| IP100412957       | Hypothetical protein DKFZp451K165             | NOGPMIGRK            | a                        |

| IPI Accession No. | Protein Description                            | Peptide Sequence*   | Primary Source Dataset** |
|-------------------|------------------------------------------------|---------------------|--------------------------|
| IP000412957       | Hypothetical protein DKFZp547E186              | SHSFPESSGQQNPKPYM   | a                        |
| IP00044650        | Hypothetical protein DKFZp547E186              | ETVTFNSLLRPRVIGEW   | a                        |
| IP00044650        | Hypothetical protein DKFZp547E186              | LSAPHARVAPRAATHAR   | a                        |
| IP00044650        | Hypothetical protein DKFZp547E186              | RRVVPFGGAQFR        | a                        |
| IP000472160       | Hypothetical protein DKFZp547L106              | ADSDSSQRDR          | a                        |
| IP000472160       | Hypothetical protein DKFZp547L106              | ADSDSSQRDRNGNQLR    | a                        |
| IP000472160       | Hypothetical protein DKFZp547L106              | NFEDR               | a                        |
| IP000472160       | Hypothetical protein DKFZp547L106              | RFQQFTR             | a                        |
| IP000300285       | Hypothetical protein DKFZp564D1378             | TFLEALR             | c; d                     |
| IP00000581        | Hypothetical protein DKFZp564E242              | EYAEDDNIYQK         | c; d                     |
| IP00000581        | Hypothetical protein DKFZp564E242              | IQQELAVQNPLYSER     | c; d; e                  |
| IP000553153       | Hypothetical protein DKFZp564G0422             | EAGGAFGK            | c; d; e                  |
| IP000553153       | Hypothetical protein DKFZp564G0422             | EQLAALK             | c; d                     |
| IP000480085       | Hypothetical protein DKFZp566K013              | EMEELIPLVNR         | e                        |
| IP000480085       | Hypothetical protein DKFZp566K013              | MEFNEK              | d                        |
| IP000480085       | Hypothetical protein DKFZp566K013              | SVDLVQELINTVK       | e                        |
| IP000480085       | Hypothetical protein DKFZp566K013              | VPVGDQPPDIEYQIR     | d; e                     |
| IP000383815       | Hypothetical protein DKFZp566Q224              | ASWEGHWSPAPSR       | a                        |
| IP000056976       | Hypothetical protein DKFZp566P0446             | LITQTFSHHQLAQK      | a                        |
| IP000056976       | Hypothetical protein DKFZp566P0446             | LYSSDPEINTK         | a                        |
| IP000056976       | Hypothetical protein DKFZp566P0446             | VYTVHLEK            | a                        |
| IP00031064        | Hypothetical protein DKFZp586C1924             | GNILSYWIR           | e                        |
| IP00107570        | Hypothetical protein DKFZp667H197              | EMILNPEGDVNSAK      | a                        |
| IP00107570        | Hypothetical protein DKFZp667H197              | QYMGNR              | a                        |
| IP00107570        | Hypothetical protein DKFZp667H197              | YNEKGMPTEAMVAFES    | a                        |
| IP000375682       | Hypothetical protein DKFZp686A17109            | CRPLRVLHGEPSPQR     | a                        |
| IP000375682       | Hypothetical protein DKFZp686A17109            | ILNDPESKR           | a                        |
| IP000375682       | Hypothetical protein DKFZp686A17109            | LSPPGQR             | a                        |
| IP000375682       | Hypothetical protein DKFZp686A17109            | MQYTVDLAIGSEK       | a                        |
| IP000375682       | Hypothetical protein DKFZp686A17109            | TANRMQYTVDLAIGSEKR  | a                        |
| IP000375682       | Hypothetical protein DKFZp686A17109            | TPLPEIGRR           | a                        |
| IP000375682       | Hypothetical protein DKFZp686A17109            | VLESELK             | a                        |
| IP000375682       | Hypothetical protein DKFZp686A17109            | VLMPLQAQVRAPR       | a                        |
| IP000470596       | Hypothetical protein DKFZp686A179              | HLTAKTPTK           | a                        |
| IP000470596       | Hypothetical protein DKFZp686A179              | LDFHEAQK            | a                        |
| IP000470596       | Hypothetical protein DKFZp686A179              | SRPRFNPRGDFPLQRPR   | a                        |
| IP000470596       | Hypothetical protein DKFZp686A179              | SRSRPMHYMVRPSR      | a                        |
| IP000470596       | Hypothetical protein DKFZp686A179              | TEDSSSGK            | a                        |
| IP000470596       | Hypothetical protein DKFZp686A179              | YNKSTGK             | a                        |
| IP000426051       | Hypothetical protein DKFZp686C15213            | GLPAPIEK            | c; d                     |
| IP000552929       | Hypothetical protein DKFZp686D0714             | AQGGQTQSPK          | c; h                     |
| IP000470799       | Hypothetical protein DKFZp686D17136            | EMLDTNK             | a                        |
| IP000470799       | Hypothetical protein DKFZp686D17136            | MTSEEEQLEPASWSR     | a                        |
| IP000470799       | Hypothetical protein DKFZp686D17136            | VTATANLGR           | a                        |
| IP000426062       | Hypothetical protein DKFZp686E04229            | LLASCGK             | a                        |
| IP000418336       | Hypothetical protein DKFZp686E1950             | CMSIVTSMTAGVSR      | a                        |
| IP000418336       | Hypothetical protein DKFZp686E1950             | LLFMISR             | a                        |
| IP000418336       | Hypothetical protein DKFZp686E1950             | QKEVDFCISLLRER      | a                        |
| IP000418205       | Hypothetical protein DKFZp686F1969             | APCRRSVVEDMAHAAR    | a                        |
| IP000418205       | Hypothetical protein DKFZp686F1969             | AVDPPK              | a                        |
| IP000418205       | Hypothetical protein DKFZp686F1969             | IRAVGNVLRAPCR       | a                        |
| IP000418205       | Hypothetical protein DKFZp686F1969             | KAAQVEK             | a                        |
| IP000418205       | Hypothetical protein DKFZp686F1969             | LLYSMK              | a                        |
| IP000418205       | Hypothetical protein DKFZp686F1969             | LQGDPPWRK           | a                        |
| IP000418205       | Hypothetical protein DKFZp686F1969             | SQLLNAVLSPGHR       | a                        |
| IP000743271       | Hypothetical protein DKFZp686G1540             | QPPGVPVTPPLPSEK     | e                        |
| IP000743271       | Hypothetical protein DKFZp686G1540             | SAVFPVNVNPEYSATR    | e                        |
| IP000396060       | Hypothetical protein DKFZp686G1990             | DEQDFR              | a                        |
| IP000396060       | Hypothetical protein DKFZp686G1990             | ILNQQLR             | a                        |
| IP000396060       | Hypothetical protein DKFZp686G1990             | MPMESASDNK          | a                        |
| IP000396008       | Hypothetical protein DKFZp686H12245            | DFRELLMIASGQGVNIV   | a                        |
| IP000396008       | Hypothetical protein DKFZp686H12245            | EELRR               | a                        |
| IP000396008       | Hypothetical protein DKFZp686H12245            | KSRPSMANEK          | a                        |
| IP000396008       | Hypothetical protein DKFZp686H12245            | LPPTGYKRQR          | a                        |
| IP000396008       | Hypothetical protein DKFZp686H12245            | QNGSSSGPER          | a                        |
| IP000396008       | Hypothetical protein DKFZp686H12245            | RKALEEK             | a                        |
| IP000396008       | Hypothetical protein DKFZp686H12245            | SLSHPSRSPGPMVTPH    | a                        |
| IP000396008       | Hypothetical protein DKFZp686H12245            | SMPGERIK            | a                        |
| IP000470804       | Hypothetical protein DKFZp686H22230            | LVPPECNCLR          | a                        |
| IP000470804       | Hypothetical protein DKFZp686H22230            | QYQALEK             | a                        |
| IP000470804       | Hypothetical protein DKFZp686H22230            | SADGIAMQGTGTDVSK    | a                        |
| IP000470804       | Hypothetical protein DKFZp686H22230            | TEDQEDIIYFMKGALEIVI | a                        |
| IP000418153       | Hypothetical protein DKFZp686I15212            | GPSVFLAPCSR         | c                        |
| IP000384949       | Hypothetical protein DKFZp686I22213            | MDFGPGR             | d                        |
| IP000375843       | Hypothetical protein DKFZp686I1375             | RTDMETFVQLK         | a                        |
| IP000384952       | Hypothetical protein DKFZp686K04218 (Fragment) | SAVQGPPEK           | c; d                     |
| IP000375737       | Hypothetical protein DKFZp686K091              | LNMK                | a                        |
| IP000375737       | Hypothetical protein DKFZp686K091              | NLDLNRSTGK          | a                        |
| IP000375737       | Hypothetical protein DKFZp686K091              | VGSTDAIGAFVYVSMG    | a                        |
| IP000464973       | Hypothetical protein DKFZp686K11107            | VYTDHISVANEDGRR     | a                        |
| IP000375756       | Hypothetical protein DKFZp686L18142            | CIGCKNFESPER        | a                        |
| IP000375756       | Hypothetical protein DKFZp686L18142            | SPGTLERSSLDK        | a                        |
| IP000375756       | Hypothetical protein DKFZp686L18142            | SPREEKAAAGVPDQLS    | a                        |
| IP000375756       | Hypothetical protein DKFZp686L18142            | SSLDK               | a                        |
| IP000384972       | Hypothetical protein DKFZp686L2032             | GGMTNCTLPHR         | a                        |
| IP000384972       | Hypothetical protein DKFZp686L2032             | LLNPPPPVHDNPHSKMR   | a                        |
| IP000384972       | Hypothetical protein DKFZp686L2032             | QADIESRAR           | a                        |
| IP000470461       | Hypothetical protein DKFZp686L2367             | KCFCEVHPITLR        | a                        |
| IP000470461       | Hypothetical protein DKFZp686L2367             | CPLCLYHTK           | a                        |
| IP000470461       | Hypothetical protein DKFZp686L2367             | HGMALNDTK           | a                        |
| IP000470461       | Hypothetical protein DKFZp686L2367             | LYVCK               | a                        |
| IP000470461       | Hypothetical protein DKFZp686L2367             | SISRHEMHSLSGKTAIVYK | a                        |
| IP000641334       | Hypothetical protein DKFZp86M0619              | GQEVTSVYYR          | e                        |
| IP000386700       | Hypothetical protein DKFZp86M21196             | ELAGGQRAEPASSR      | a                        |
| IP000386700       | Hypothetical protein DKFZp86M21196             | ELLEPPR             | a                        |
| IP000386700       | Hypothetical protein DKFZp86M21196             | ENLRISGVVTSR        | a                        |
| IP000384938       | Hypothetical protein DKFZp86N02209             | FNWYVDGVEVHNK       | d                        |

| IPi Accession No. | Protein Description                          | Peptide Sequence*            | Primary Source Dataset** |
|-------------------|----------------------------------------------|------------------------------|--------------------------|
| IPi00470954       | Hypothetical protein DKFZp686N1231           | LPTTGNLAK                    | a                        |
| IPi00470954       | Hypothetical protein DKFZp686N1231           | NILAMTVELEK                  | a                        |
| IPi00470954       | Hypothetical protein DKFZp686N1231           | VLMGPR                       | a                        |
| IPi00423463       | Hypothetical protein DKFZp686O01196          | EPQVYTLPPSR                  | d; e                     |
| IPi00423463       | Hypothetical protein DKFZp686O01196          | GPSVFLAPSSK                  | c; d                     |
| IPi00453458       | Hypothetical protein DKFZp686O06111          | DINPFSK                      | a                        |
| IPi00453458       | Hypothetical protein DKFZp686O06111          | EGPQVSENLQK                  | a                        |
| IPi00453458       | Hypothetical protein DKFZp686O06111          | NKEGQVSENLQK                 | a                        |
| IPi00453458       | Hypothetical protein DKFZp686O06111          | SNQLKEIRR                    | a                        |
| IPi00414481       | Hypothetical protein DKFZp686O0870           | DILHATFEESLDTKTHSV           | a                        |
| IPi00414481       | Hypothetical protein DKFZp686O0870           | LRVHDEADQSALQR               | a                        |
| IPi00414481       | Hypothetical protein DKFZp686O0870           | MDFTVR                       | a                        |
| IPi00414481       | Hypothetical protein DKFZp686O0870           | TKKGTDVMVR                   | a                        |
| IPi00328131       | Hypothetical protein DKFZp686O09161          | SIPEQLGGQKEPSK               | a                        |
| IPi00470484       | Hypothetical protein DKFZp686O1697           | ITVDDYGAR                    | a                        |
| IPi00470484       | Hypothetical protein DKFZp686O1697           | LGGWHTVMLYR                  | a                        |
| IPi00470484       | Hypothetical protein DKFZp686O1697           | RIGMRPVPVLGK                 | a                        |
| IPi00470484       | Hypothetical protein DKFZp686O1697           | TLCPPEASGGR                  | a                        |
| IPi00470484       | Hypothetical protein DKFZp686O1697           | WTSHERIQMSDMVIK              | a                        |
| IPi00385612       | Hypothetical protein DKFZp761D171 (Fragment) | IVDDVEYEK                    | d                        |
| IPi00385612       | Hypothetical protein DKFZp761D171 (Fragment) | SIELDGTIVGAEAPGELGGLGPGPAEAR | d; e                     |
| IPi00385612       | Hypothetical protein DKFZp761D171 (Fragment) | VGDAQMFEPDGGGRPK             | d; e                     |
| IPi00413016       | Hypothetical protein DKFZp761G128            | GAEDAPDADTAINAEGSQVNAEEK     | d; e                     |
| IPi00413016       | Hypothetical protein DKFZp761G128            | IPSTFPFQEQPLTLTCEK           | e                        |
| IPi00413016       | Hypothetical protein DKFZp761G128            | TFTVSNLDFR                   | d                        |
| IPi00165284       | Hypothetical protein DKFZp761K0922           | LA AEDATNEK                  | e                        |
| IPi00165284       | Hypothetical protein DKFZp761K0922           | QALQGER                      | c; d; e                  |
| IPi00328584       | Hypothetical protein DKFZp761O0610           | AAVPLIR                      | a                        |
| IPi00328584       | Hypothetical protein DKFZp761O0610           | CLLEQGANPAFR                 | a                        |
| IPi00328584       | Hypothetical protein DKFZp761O0610           | CLLEQGANPAFRNDK              | a                        |
| IPi00328584       | Hypothetical protein DKFZp761O0610           | LHEGSQVLLTSNEMGT             | a                        |
| IPi00402088       | Hypothetical protein DKFZp761P211            | DAETAAAAAAVAADPR             | e                        |
| IPi00385347       | Hypothetical protein DKFZp779O048            | ALVFQPAELK                   | c; d                     |
| IPi0002354        | Hypothetical protein DKFZp781A1155           | YILDVLR                      | d                        |
| IPi00470912       | Hypothetical protein DKFZp781D2023           | ELAAHLRRK                    | a                        |
| IPi00470912       | Hypothetical protein DKFZp781D2023           | FVDLTPMVR                    | a                        |
| IPi00470912       | Hypothetical protein DKFZp781D2023           | SAQPPRR                      | a                        |
| IPi00470912       | Hypothetical protein DKFZp781D2023           | SPARRSHR                     | a                        |
| IPi00470912       | Hypothetical protein DKFZp781D2023           | SPSGMRQGR                    | a                        |
| IPi00292934       | Hypothetical protein DKFZp781E1417           | EHHQSDQEK                    | a                        |
| IPi00292934       | Hypothetical protein DKFZp781E1417           | HDRVVPQRASAAQISSS            | a                        |
| IPi00292934       | Hypothetical protein DKFZp781E1417           | NLEAGYK                      | a                        |
| IPi00292934       | Hypothetical protein DKFZp781E1417           | WKDVSFK                      | a                        |
| IPi00470812       | Hypothetical protein DKFZp781E21107          | DTGPSVFPPR                   | a                        |
| IPi00470812       | Hypothetical protein DKFZp781E21107          | SFRRNRFLPK                   | a                        |
| IPi00470896       | Hypothetical protein DKFZp781H1112           | ADEVEWLDLK                   | a                        |
| IPi00470896       | Hypothetical protein DKFZp781H1112           | HMNTLQLQMEVTRFLHR            | a                        |
| IPi00470896       | Hypothetical protein DKFZp781H1112           | VLQDFQLDAAMTYCRAA            | a                        |
| IPi00556351       | Hypothetical protein DKFZp781H1755           | EVAENQQNQSSDPEEEK            | c                        |
| IPi00556351       | Hypothetical protein DKFZp781H1755           | FIPFWLK                      | d                        |
| IPi00556351       | Hypothetical protein DKFZp781H1755           | GSQPPAAESQSLR                | d                        |
| IPi00470905       | Hypothetical protein DKFZp781O0519           | FIQYLASR                     | d                        |
| IPi00470905       | Hypothetical protein DKFZp781O0519           | NTLFNLNSFLDK                 | d                        |
| IPi00470905       | Hypothetical protein DKFZp781O0519           | QMAFDAR                      | d; e                     |
| IPi00290755       | Hypothetical protein FAM81A                  | ENSGASER                     | c                        |
| IPi00165454       | Hypothetical protein FLJ10300                | CRDPDQARSR                   | a                        |
| IPi00165454       | Hypothetical protein FLJ10300                | EPRDTINSSPSR                 | a                        |
| IPi00165454       | Hypothetical protein FLJ10300                | ESEMDLPEHK                   | a                        |
| IPi00165454       | Hypothetical protein FLJ10300                | LCSFLR                       | a                        |
| IPi00018098       | Hypothetical protein FLJ10330                | AGGGCVMTIGEMLR               | a                        |
| IPi00018098       | Hypothetical protein FLJ10330                | NIDQKIK                      | a                        |
| IPi00018098       | Hypothetical protein FLJ10330                | RSQIEQESQEKQHK               | a                        |
| IPi00178257       | Hypothetical protein FLJ10520                | APLDAYFQVSR                  | a                        |
| IPi00178257       | Hypothetical protein FLJ10520                | MLSTANMK                     | a                        |
| IPi00178257       | Hypothetical protein FLJ10520                | QPSPOK                       | a                        |
| IPi00018690       | Hypothetical protein FLJ10547                | EVEGLDGLTQWTEGR              | a                        |
| IPi00018690       | Hypothetical protein FLJ10547                | MENPEATDQR                   | a                        |
| IPi00302151       | Hypothetical protein FLJ10786                | GQSMPSLR                     | a                        |
| IPi00302151       | Hypothetical protein FLJ10786                | LTVASLCSQVAK                 | a                        |
| IPi00302151       | Hypothetical protein FLJ10786                | TNLSSSHLEENQVR               | a                        |
| IPi00217606       | Hypothetical protein FLJ10787                | FDNRGR                       | a                        |
| IPi00217606       | Hypothetical protein FLJ10787                | HIISLMEK                     | a                        |
| IPi00217606       | Hypothetical protein FLJ10787                | RVFATFNTCQFR                 | a                        |
| IPi00217606       | Hypothetical protein FLJ10787                | SCKSSCVK                     | a                        |
| IPi00182304       | Hypothetical protein FLJ10900                | IFYGSQTGTAK                  | a                        |
| IPi00182304       | Hypothetical protein FLJ10900                | WLWMLGAHRVMSR                | a                        |
| IPi00182304       | Hypothetical protein FLJ10900                | WTKSMRLR                     | a                        |
| IPi00386418       | Hypothetical protein FLJ13071                | ACRIMGKIK                    | a                        |
| IPi00335437       | Hypothetical protein FLJ13144                | EHYKLDWHR                    | a                        |
| IPi00411743       | Hypothetical protein FLJ13215                | DLHVLNSDQNLPK                | a                        |
| IPi00411743       | Hypothetical protein FLJ13215                | WEIARGNTPGVPLAYDR            | a                        |
| IPi00161085       | Hypothetical protein FLJ14183                | ENNLRKPK                     | a                        |
| IPi00161085       | Hypothetical protein FLJ14183                | FRMDSR                       | a                        |
| IPi00161085       | Hypothetical protein FLJ14183                | LMDLQSHFGTDDRFR              | a                        |
| IPi00161085       | Hypothetical protein FLJ14183                | MDCRK                        | a                        |
| IPi00161085       | Hypothetical protein FLJ14183                | RQTFESQDR                    | a                        |
| IPi00045872       | Hypothetical protein FLJ14503                | RCEFSGGIPK                   | a                        |
| IPi00045872       | Hypothetical protein FLJ14503                | RPSSPVISK                    | a                        |
| IPi00045872       | Hypothetical protein FLJ14503                | TKLVVPNK                     | a                        |
| IPi00045872       | Hypothetical protein FLJ14503                | VEKEEQDR                     | a                        |
| IPi00446856       | Hypothetical protein FLJ16025                | NFPQELR                      | a                        |
| IPi00442310       | Hypothetical protein FLJ16168                | DLVQAMK                      | a                        |
| IPi00442310       | Hypothetical protein FLJ16168                | HLPFPLEK                     | a                        |
| IPi00442310       | Hypothetical protein FLJ16168                | TPLGKGR                      | a                        |
| IPi00442150       | Hypothetical protein FLJ16420                | KEDSHIGK                     | a                        |
| IPi00442098       | Hypothetical protein FLJ16473                | LFIQK                        | a                        |
| IPi00217200       | Hypothetical protein FLJ16496                | SIPATLALESK                  | a                        |



| IPI Accession No. | Protein Description           | Peptide Sequence*  | Primary Source Dataset** |
|-------------------|-------------------------------|--------------------|--------------------------|
| IP000217200       | Hypothetical protein FLJ16496 | SRIHLAEAAQRQAHGME  | a                        |
| IP000217200       | Hypothetical protein FLJ16496 | VLGGINR            | a                        |
| IP000442193       | Hypothetical protein FLJ16605 | DVSGEWPR           | a                        |
| IP000442193       | Hypothetical protein FLJ16605 | SFECRACKS          | a                        |
| IP000477620       | Hypothetical protein FLJ16757 | EFNRRLPEEEENHK     | a                        |
| IP000477620       | Hypothetical protein FLJ16757 | HLQFVEEEAELLR      | a                        |
| IP000477620       | Hypothetical protein FLJ16757 | KMAKLR             | a                        |
| IP000477620       | Hypothetical protein FLJ16757 | LEQLEEKTEENK       | a                        |
| IP000477620       | Hypothetical protein FLJ16757 | LQHENHALLSNQIR     | a                        |
| IP000477620       | Hypothetical protein FLJ16757 | TFNQDSDADLR        | a                        |
| IP000165009       | Hypothetical protein FLJ20055 | DVPNHGFR           | a                        |
| IP000004550       | Hypothetical protein FLJ20261 | GSFGCGSSR          | a                        |
| IP000183938       | Hypothetical protein FLJ20272 | AVIDGMTDRSGDVATGL  | a                        |
| IP000183938       | Hypothetical protein FLJ20272 | AWELSRYSAR         | a                        |
| IP000183938       | Hypothetical protein FLJ20272 | IDSYLEK            | a                        |
| IP000183938       | Hypothetical protein FLJ20272 | NKEFQECVECFERSVK   | a                        |
| IP000183938       | Hypothetical protein FLJ20272 | RVERAMR            | a                        |
| IP000061356       | Hypothetical protein FLJ20364 | EKKCVK             | a                        |
| IP000301683       | Hypothetical protein FLJ20756 | RMGLNLPEVPSALPR    | a                        |
| IP000152977       | Hypothetical protein FLJ21019 | DLPALR             | a                        |
| IP000152977       | Hypothetical protein FLJ21019 | ELVPSLAEISALSQR    | a                        |
| IP000302860       | Hypothetical protein FLJ21972 | DDQLTLTPMGRK       | a                        |
| IP000302860       | Hypothetical protein FLJ21972 | PLTDGMILLR         | a                        |
| IP000302860       | Hypothetical protein FLJ21972 | NMTLVAEVRAQLR      | a                        |
| IP000025094       | Hypothetical protein FLJ22037 | ANAAAAALDK         | a                        |
| IP000025094       | Hypothetical protein FLJ22037 | KLAARLQEAEEAAETAQA | a                        |
| IP000025094       | Hypothetical protein FLJ22037 | MILAEWOQK          | a                        |
| IP000025094       | Hypothetical protein FLJ22037 | SBSTAVVSLANTK      | a                        |
| IP000028307       | Hypothetical protein FLJ22346 | LQENLKK            | d                        |
| IP000028416       | Hypothetical protein FLJ22484 | NDSLVTPSPQQAAR     | a                        |
| IP000184700       | Hypothetical protein FLJ22673 | EDLQVPR            | e, e                     |
| IP000332872       | Hypothetical protein FLJ23121 | STSESSEGGVSSPGK    | a                        |
| IP000015695       | Hypothetical protein FLJ23554 | LGGLGPDFESIRDKTQK  | a                        |
| IP000410082       | Hypothetical protein FLJ23577 | KEAEDVADEIK        | a                        |
| IP000410082       | Hypothetical protein FLJ23577 | RQNEIMAK           | a                        |
| IP000152701       | Hypothetical protein FLJ23660 | KLIREAGNSFVR       | a                        |
| IP000152701       | Hypothetical protein FLJ23660 | VYPLGLR            | a                        |
| IP000152665       | Hypothetical protein FLJ23822 | GPVPGSGGGSTRDQVR   | a                        |
| IP000152665       | Hypothetical protein FLJ23822 | TTEEIWK            | a                        |
| IP000180404       | Hypothetical protein FLJ25225 | EEEEQRREEQK        | a                        |
| IP000180404       | Hypothetical protein FLJ25225 | LSFEEMER           | a                        |
| IP000180404       | Hypothetical protein FLJ25225 | NFELEKER           | a                        |
| IP000180404       | Hypothetical protein FLJ25225 | QEMGEEEEENETPGLSR  | a                        |
| IP000180404       | Hypothetical protein FLJ25225 | YEEDKR             | a                        |
| IP000180404       | Hypothetical protein FLJ25225 | YEEDKRIR           | a                        |
| IP000065121       | Hypothetical protein FLJ25320 | MARVDAK            | e                        |
| IP000059139       | Hypothetical protein FLJ25326 | ILMSTMIR           | a                        |
| IP000059139       | Hypothetical protein FLJ25326 | ILLEPMIVR          | a                        |
| IP000059139       | Hypothetical protein FLJ25326 | NDLISDLSEAK        | a                        |
| IP000151636       | Hypothetical protein FLJ25333 | ASIMSSDINYNK       | a                        |
| IP000151636       | Hypothetical protein FLJ25333 | MEQMEK             | a                        |
| IP000307317       | Hypothetical protein FLJ25359 | GLKHDTTSYSFYMQRIK  | a                        |
| IP000307317       | Hypothetical protein FLJ25359 | VLKSPR             | a                        |
| IP000167215       | Hypothetical protein FLJ25530 | SFGLPIRSARR        | a                        |
| IP000167121       | Hypothetical protein FLJ25965 | MEPNASESAPARR      | a                        |
| IP000167121       | Hypothetical protein FLJ25965 | TRQIAQEIVK         | a                        |
| IP000443024       | Hypothetical protein FLJ26089 | SPVLIAK            | c                        |
| IP000442522       | Hypothetical protein FLJ27077 | DQLIYNLLK          | a; d                     |
| IP000442522       | Hypothetical protein FLJ27077 | GAAILK             | a                        |
| IP000442522       | Hypothetical protein FLJ27077 | MATLKDQLIYNLLK     | a                        |
| IP000043669       | Hypothetical protein FLJ30870 | APQEHDRPFRPGYTEAS  | a                        |
| IP000043669       | Hypothetical protein FLJ30870 | LGEALNGK           | a                        |
| IP000043669       | Hypothetical protein FLJ30870 | MGAVWACRLFSQETSNS  | a                        |
| IP000043669       | Hypothetical protein FLJ30870 | PSTWEAEAGGSAGR     | a                        |
| IP000043669       | Hypothetical protein FLJ30870 | QPDVLR             | a                        |
| IP000043669       | Hypothetical protein FLJ30870 | SKVASLGGMGLR       | a                        |
| IP000043516       | Hypothetical protein FLJ31726 | TDLEHVRR           | a                        |
| IP000061009       | Hypothetical protein FLJ31872 | NLTENQEALAK        | a                        |
| IP000217923       | Hypothetical protein FLJ32844 | GHIQRR             | a                        |
| IP000217923       | Hypothetical protein FLJ32844 | KAAAQSQCQISTLR     | a                        |
| IP000216853       | Hypothetical protein FLJ33620 | NAVMLRCFLKAR       | a                        |
| IP000216853       | Hypothetical protein FLJ33620 | QLCQEK             | a                        |
| IP000301019       | Hypothetical protein FLJ33674 | GFRPLENSEIPMPGAH   | a                        |
| IP000301019       | Hypothetical protein FLJ33674 | RGLIRVTTQR         | a                        |
| IP000168187       | Hypothetical protein FLJ34064 | GNFADKEPTK         | a                        |
| IP000168187       | Hypothetical protein FLJ34064 | ISLIALTRK          | a                        |
| IP000168187       | Hypothetical protein FLJ34064 | STGFFTIKEENSHLK    | a                        |
| IP000168187       | Hypothetical protein FLJ34064 | YVVCGR             | a                        |
| IP000180781       | Hypothetical protein FLJ34389 | LTTAMNR            | a                        |
| IP000180781       | Hypothetical protein FLJ34389 | RMVLVLGAAR         | a                        |
| IP000180781       | Hypothetical protein FLJ34389 | TQTSMSLGTTRK       | a                        |
| IP000398765       | Hypothetical protein FLJ34415 | MLDQRIK            | a                        |
| IP000182980       | Hypothetical protein FLJ35064 | CFVRVENVK          | a                        |
| IP000182980       | Hypothetical protein FLJ35064 | VYMQVYQLELQLAK     | a                        |
| IP000168047       | Hypothetical protein FLJ35093 | RGAMSEETVSESQFSLK  | a                        |
| IP000168047       | Hypothetical protein FLJ35093 | YSSTETLAEDLMQLLIR  | a                        |
| IP000300564       | Hypothetical protein FLJ35588 | APRSGRLQER         | a                        |
| IP000300564       | Hypothetical protein FLJ35588 | CQKETDCDLCLR       | a                        |
| IP000300564       | Hypothetical protein FLJ35588 | DDVLLLETR          | a                        |
| IP000385748       | Hypothetical protein FLJ35635 | IQAILEDLLR         | a                        |
| IP000297462       | Hypothetical protein FLJ35728 | AGFSHFSQPPYR       | a                        |
| IP000297462       | Hypothetical protein FLJ35728 | AWEEK              | a                        |
| IP000297462       | Hypothetical protein FLJ35728 | EKAQK              | a                        |
| IP000297462       | Hypothetical protein FLJ35728 | LEKARAEHR          | a                        |
| IP000297462       | Hypothetical protein FLJ35728 | MAGFSHFSQPPYR      | a                        |
| IP000297462       | Hypothetical protein FLJ35728 | TLOSPEQR           | a                        |
| IP000297462       | Hypothetical protein FLJ35728 | TLOSPEQRDLRR       | a                        |



| IPI Accession No. | Protein Description           | Peptide Sequence*  | Primary Source Dataset** |
|-------------------|-------------------------------|--------------------|--------------------------|
| IP00167908        | Hypothetical protein FLJ35834 | ETQHASIGR          | a                        |
| IP00167908        | Hypothetical protein FLJ35834 | LEWETQQELR         | a                        |
| IP00167908        | Hypothetical protein FLJ35834 | VTGVYHNAGTQTPVKRI  | a                        |
| IP00167904        | Hypothetical protein FLJ35843 | ILVQLGETGK         | a                        |
| IP00167904        | Hypothetical protein FLJ35843 | MQEANNPRK          | a                        |
| IP00167904        | Hypothetical protein FLJ35843 | MQEANNPRKLQK       | a                        |
| IP00167904        | Hypothetical protein FLJ35843 | VEAMAR             | a                        |
| IP00167821        | Hypothetical protein FLJ36180 | GQHVREPVCK         | a                        |
| IP00167821        | Hypothetical protein FLJ36180 | NNEIK              | a                        |
| IP00167821        | Hypothetical protein FLJ36180 | TEWEVGICK          | a                        |
| IP00295898        | Hypothetical protein FLJ36492 | EVEEEMEK           | a                        |
| IP00395716        | Hypothetical protein FLJ37970 | EALQAELEK          | a                        |
| IP00395716        | Hypothetical protein FLJ37970 | ELEQAALERQEFLLR    | a                        |
| IP00187000        | Hypothetical protein FLJ38262 | KLAEKAMEIEEQNK     | a                        |
| IP00187000        | Hypothetical protein FLJ38262 | RLIADK             | a                        |
| IP00187000        | Hypothetical protein FLJ38262 | VIAMEK             | a                        |
| IP00175313        | Hypothetical protein FLJ38375 | AHQNHFTGEK         | a                        |
| IP00175313        | Hypothetical protein FLJ38375 | IHTGEKPYECNECGR    | a                        |
| IP00175313        | Hypothetical protein FLJ38375 | TFADNSALR          | a                        |
| IP00167572        | Hypothetical protein FLJ38426 | SLCNLEESTSAGR      | a                        |
| IP00167572        | Hypothetical protein FLJ38426 | TSSGTSREK          | a                        |
| IP00167617        | Hypothetical protein FLJ38753 | ELLQQR             | a                        |
| IP00167617        | Hypothetical protein FLJ38753 | MEENFIQK           | a                        |
| IP00167617        | Hypothetical protein FLJ38753 | QYLVDVCPK          | a                        |
| IP00167617        | Hypothetical protein FLJ38753 | STLCLFADSVSPRFVPK  | a                        |
| IP00183114        | Hypothetical protein FLJ39207 | MTVHSSVHSNLSMPA    | a                        |
| IP00171188        | Hypothetical protein FLJ39592 | ECGRGSSQNSDLIK     | a                        |
| IP00171188        | Hypothetical protein FLJ39592 | HYVRECGR           | a                        |
| IP00171188        | Hypothetical protein FLJ39592 | LTQNHAK            | a                        |
| IP00171188        | Hypothetical protein FLJ39592 | NGENVETMK          | a                        |
| IP00167447        | Hypothetical protein FLJ39662 | ARGEASQSQATDGR     | a                        |
| IP00176210        | Hypothetical protein FLJ40243 | DFPYPR             | a                        |
| IP00176210        | Hypothetical protein FLJ40243 | DMRDNNMLR          | a                        |
| IP00176210        | Hypothetical protein FLJ40243 | LLDQDLPR           | a                        |
| IP00176210        | Hypothetical protein FLJ40243 | LVDLWTR            | a                        |
| IP00176210        | Hypothetical protein FLJ40243 | QAAASSTIGLFYIK     | a                        |
| IP00176210        | Hypothetical protein FLJ40243 | QFCVRLAK           | a                        |
| IP00176210        | Hypothetical protein FLJ40243 | QMAIRGLGNTASGAPHK  | a                        |
| IP00176210        | Hypothetical protein FLJ40243 | TNFHENEK           | a                        |
| IP00176210        | Hypothetical protein FLJ40243 | YVNHWRDFPYPR       | a                        |
| IP00446785        | Hypothetical protein FLJ41116 | LMIMGTRTLRAAQLMMM  | a                        |
| IP00446785        | Hypothetical protein FLJ41116 | LMMMGTTR           | a                        |
| IP00446785        | Hypothetical protein FLJ41116 | LMMMGTTRIDR        | a                        |
| IP00446785        | Hypothetical protein FLJ41116 | LMMMGTTRHRAAR      | a                        |
| IP00446785        | Hypothetical protein FLJ41116 | LMRGTRTHR          | a                        |
| IP00446785        | Hypothetical protein FLJ41116 | LTMMGTRTLRL        | a                        |
| IP00446785        | Hypothetical protein FLJ41116 | TARLMIMGTRTLR      | a                        |
| IP00446785        | Hypothetical protein FLJ41116 | TLRAARLMMMGTTR     | a                        |
| IP00445968        | Hypothetical protein FLJ43252 | DEQSMLEK           | a                        |
| IP00445968        | Hypothetical protein FLJ43252 | GILYIK             | a                        |
| IP00445727        | Hypothetical protein FLJ43470 | CELPLEKTCDDR       | a                        |
| IP00445727        | Hypothetical protein FLJ43470 | LVRGHFCPIKR        | a                        |
| IP00445727        | Hypothetical protein FLJ43470 | NOTKNLLQK          | a                        |
| IP00445727        | Hypothetical protein FLJ43470 | LNKINTLK           | a                        |
| IP00479260        | Hypothetical protein FLJ43748 | MVIDVIK            | a                        |
| IP00479260        | Hypothetical protein FLJ43748 | QEEETLYDEIEK       | a                        |
| IP00479260        | Hypothetical protein FLJ43748 | EGMALTSGLAATR      | a                        |
| IP00410480        | Hypothetical protein FLJ43860 | EGMALTSGLAATRLDD   | a                        |
| IP00410480        | Hypothetical protein FLJ43860 | SRQAMHIASSCK       | a                        |
| IP00479279        | Hypothetical protein FLJ43983 | ARNPEVVMEMK        | a                        |
| IP00479279        | Hypothetical protein FLJ43983 | ELGQMNLTER         | a                        |
| IP00479279        | Hypothetical protein FLJ43983 | FGEIYEK            | a                        |
| IP00479279        | Hypothetical protein FLJ43983 | FKNEVNTLEEFALK     | a                        |
| IP00479279        | Hypothetical protein FLJ43983 | LEDLGLHRAAR        | a                        |
| IP00479279        | Hypothetical protein FLJ43983 | RGGAEGSPKAVYATR    | a                        |
| IP00479279        | Hypothetical protein FLJ43983 | TSQPEMAIKDCDR      | a                        |
| IP00479279        | Hypothetical protein FLJ43983 | YFEDIEAVK          | a                        |
| IP00394855        | Hypothetical protein FLJ44112 | RSSSVKETSANK       | a                        |
| IP00445207        | Hypothetical protein FLJ44356 | GLTPTSLLDGVAAGR    | a                        |
| IP00445207        | Hypothetical protein FLJ44356 | LAGRGADPPPPSRMGR   | a                        |
| IP00445207        | Hypothetical protein FLJ44356 | LQSRHGFPR          | a                        |
| IP00445207        | Hypothetical protein FLJ44356 | MGRLAGRGADPPPPSR   | a                        |
| IP00444939        | Hypothetical protein FLJ44823 | FSGQFCEVAK         | a                        |
| IP00444939        | Hypothetical protein FLJ44823 | RQSEGTSPSQQEVAGA   | a                        |
| IP00179437        | Hypothetical protein FLJ45102 | MVTVGTNLPSPRAASAN  | a                        |
| IP00179437        | Hypothetical protein FLJ45102 | NRRSLSPILSGR       | a                        |
| IP00418925        | Hypothetical protein FLJ45169 | DADRMHVR           | a                        |
| IP00418925        | Hypothetical protein FLJ45169 | MFTISSDQRMILNRLSR  | a                        |
| IP00418925        | Hypothetical protein FLJ45169 | TREELK             | a                        |
| IP00418925        | Hypothetical protein FLJ45169 | YHPDK              | a                        |
| IP00444569        | Hypothetical protein FLJ45338 | SLTRQSR            | a                        |
| IP00175977        | Hypothetical protein FLJ45446 | DWCFSTPK           | a                        |
| IP00175977        | Hypothetical protein FLJ45446 | LYIPRSTATAALGAAARL | a                        |
| IP00175977        | Hypothetical protein FLJ45446 | STMELVLDMPDVR      | a                        |
| IP00399257        | Hypothetical protein FLJ45804 | QSCKK              | a                        |
| IP00399257        | Hypothetical protein FLJ45804 | SGSSGARTQR         | a                        |
| IP00399257        | Hypothetical protein FLJ45804 | VLEGQPVNMLYTVFAK   | a                        |
| IP00412603        | Hypothetical protein FLJ45972 | LYGDK              | a                        |
| IP00412603        | Hypothetical protein FLJ45972 | SKIYLVMYGAR        | a                        |
| IP00444172        | Hypothetical protein FLJ46033 | ERPELLGSFEDVLRASA  | a                        |
| IP00444172        | Hypothetical protein FLJ46033 | PAGMFGVASAQQANPC   | a                        |
| IP00418813        | Hypothetical protein FLJ46113 | SLSDYNQIK          | a                        |
| IP00418813        | Hypothetical protein FLJ46113 | TITLQWLQSQESGFSR   | a                        |
| IP00418790        | Hypothetical protein FLJ46207 | DGIVALWDDSEFR      | a                        |
| IP00418790        | Hypothetical protein FLJ46207 | KDMISDIR           | a                        |
| IP00399119        | Hypothetical protein FLJ46321 | DHLLHGPETSSDKDLR   | a                        |
| IP00399119        | Hypothetical protein FLJ46321 | VLESIEIFK          | a                        |

| IPI Accession No. | Protein Description                            | Peptide Sequence*  | Primary Source Dataset** |
|-------------------|------------------------------------------------|--------------------|--------------------------|
| IP00289435        | Hypothetical protein FLJ46335                  | MGGCIPFLKAARALCPR  | a                        |
| IP00289435        | Hypothetical protein FLJ46335                  | RNEPTLFR           | a                        |
| IP00289435        | Hypothetical protein FLJ46335                  | TKLGDHYVASVNVVR    | a                        |
| IP00443684        | Hypothetical protein FLJ46545                  | LEAISLFFFLR        | a                        |
| IP00443684        | Hypothetical protein FLJ46545                  | VAGAAGAR           | a                        |
| IP00418700        | Hypothetical protein FLJ46846                  | GDMDISVPKLEGDLK    | a                        |
| IP00174442        | Hypothetical protein FLJ90386                  | ILRTSSGSIR         | a                        |
| IP00168347        | Hypothetical protein FLJ90433                  | SQEPSVPGSRR        | a                        |
| IP00301255        | Hypothetical protein FLJ90835                  | DLDLDTKMQKSLSLDLAE | a                        |
| IP00301255        | Hypothetical protein FLJ90835                  | IVMITPSR           | a                        |
| IP00301255        | Hypothetical protein FLJ90835                  | TDGRMR             | a                        |
| IP00290358        | Hypothetical protein gs103                     | ADAPARAAGNGQPR     | a                        |
| IP00290358        | Hypothetical protein gs103                     | EESDAQWLR          | a                        |
| IP00290358        | Hypothetical protein gs103                     | MGLMVRGGVTCR       | a                        |
| IP00184855        | Hypothetical protein gs129                     | CSGGRVIFASDVR      | a                        |
| IP00184855        | Hypothetical protein gs129                     | KEIEREEK           | a                        |
| IP00184855        | Hypothetical protein gs129                     | NCMTATVISK         | a                        |
| IP00184855        | Hypothetical protein gs129                     | TITTTNDPIEANILLNFR | a                        |
| IP00023549        | Hypothetical protein HSPC159                   | GEEQSAIPYFPFIPDQPR | d; e                     |
| IP00023549        | Hypothetical protein HSPC159                   | VEILCEHPR          | d                        |
| IP00000899        | Hypothetical protein KIAA0056                  | DELKDDFAVDK        | a                        |
| IP00000899        | Hypothetical protein KIAA0056                  | ELMHYLR            | a                        |
| IP00006025        | Hypothetical protein KIAA0156                  | ALEYLK             | a                        |
| IP00006025        | Hypothetical protein KIAA0156                  | APGPMLLPQYTGAR     | a                        |
| IP00006025        | Hypothetical protein KIAA0156                  | ARELWDSIMTR        | a                        |
| IP00006025        | Hypothetical protein KIAA0156                  | YSTLEK             | a                        |
| IP00006014        | Hypothetical protein KIAA0562                  | ARELKSYYVDVAGQFLK  | a                        |
| IP00006014        | Hypothetical protein KIAA0562                  | YTAANFIQEMALFK     | a                        |
| IP000072955       | Hypothetical protein KIAA1426                  | DSFVSR             | a                        |
| IP000072955       | Hypothetical protein KIAA1426                  | DWAGGRRK           | a                        |
| IP000072955       | Hypothetical protein KIAA1426                  | GSPAGPPSPSQQAARP   | a                        |
| IP000072955       | Hypothetical protein KIAA1426                  | MTVKLGDGSGEDGLK    | a                        |
| IP000072955       | Hypothetical protein KIAA1426                  | SSQELVGLICYGELRK   | a                        |
| IP000072955       | Hypothetical protein KIAA1426                  | VGPSAGGR           | a                        |
| IP000072955       | Hypothetical protein KIAA1426                  | VPIELQPR           | a                        |
| IP000072955       | Hypothetical protein KIAA1426                  | VVTVSSRSRPR        | a                        |
| IP00009264        | hypothetical protein LOC112936                 | LFLAGYELTPTMR      | e                        |
| IP000060627       | Hypothetical protein LOC115098                 | EAPDTAEK           | c                        |
| IP00329373        | hypothetical protein LOC125988                 | IYFPR              | e                        |
| IP00175146        | hypothetical protein LOC196441                 | SSDPDLRR           | ar; d; e                 |
| IP00384608        | hypothetical protein LOC219287 isoform 1       | EPEEPSQDAPR        | d; e                     |
| IP00022300        | hypothetical protein LOC25840                  | ELFNSLQEFAGPSGK    | c                        |
| IP00410093        | hypothetical protein LOC26112                  | VLEK               | c                        |
| IP00552569        | hypothetical protein LOC54821 isoform a        | MIFLMDLLK          | d                        |
| IP00303297        | Hypothetical protein LOC552891                 | DALLVGPAGSNPFR     | d; e                     |
| IP00301465        | hypothetical protein LOC55355                  | EYCLSPR            | d                        |
| IP00103148        | hypothetical protein LOC55610 isoform b        | SLMTR              | e                        |
| IP00553211        | hypothetical protein LOC57471 isoform a        | ENPEEK             | c                        |
| IP00414973        | hypothetical protein LOC60493                  | MAATLK             | d                        |
| IP00736860        | Hypothetical protein LOC649897                 | SLSLSPG            | d; e                     |
| IP00006462        | hypothetical protein LOC84945                  | SHSPEEMAK          | e                        |
| IP00478497        | Hypothetical protein LOC91137                  | DEQGGGAFPAR        | e                        |
| IP00477140        | Hypothetical protein LRPPRC                    | IQEENVIPR          | e                        |
| IP00477140        | Hypothetical protein LRPPRC                    | TVLDQQQTPSR        | e                        |
| IP00009169        | Hypothetical protein MGC10992                  | EAHQDELGR          | a                        |
| IP00009169        | Hypothetical protein MGC10992                  | KMAELRGEMER        | a                        |
| IP00009169        | Hypothetical protein MGC10992                  | VEQHEAEVK          | a                        |
| IP00433279        | Hypothetical protein MGC19764                  | DRLLTAMR           | a                        |
| IP00433279        | Hypothetical protein MGC19764                  | IDVDTNPECVVDAGK    | a                        |
| IP00433279        | Hypothetical protein MGC19764                  | TILALRMEKIR        | a                        |
| IP00410131        | Hypothetical protein MGC62100                  | AHLMMFR            | a                        |
| IP00410131        | Hypothetical protein MGC62100                  | CKDCGKAFR          | a                        |
| IP00001399        | Hypothetical protein MOT8                      | SSPSLASSSSSSSVAAG  | a                        |
| IP000654728       | Hypothetical protein Nbla02999                 | LVEEVNPNRR         | c                        |
| IP00166392        | Hypothetical protein PSEC0200                  | SDDSVQLLNPR        | a                        |
| IP00383444        | Hypothetical protein TCP11L1                   | FVTVEELLETAR       | e                        |
| IP00218493        | Hypoxanthine-guanine phosphoribosyltransferase | DLNHVCVISETGK      | d                        |
| IP00218493        | Hypoxanthine-guanine phosphoribosyltransferase | FFADLLDYIK         | d                        |
| IP00218493        | Hypoxanthine-guanine phosphoribosyltransferase | NVLIVEDHDTGK       | d                        |
| IP00218493        | Hypoxanthine-guanine phosphoribosyltransferase | SVGYKPDFVGFEPDK    | d                        |
| IP00252162        | HZFw3 protein                                  | EAIPEGRK           | a                        |
| IP00252162        | HZFw3 protein                                  | ILSIWPSAK          | a                        |
| IP00252162        | HZFw3 protein                                  | TLTHLNGVFISEEATAA  | a                        |
| IP00252162        | HZFw3 protein                                  | TYGITGVKVK         | a                        |
| IP00465211        | HZGJ                                           | DTQLQQIVDK         | d                        |
| IP00465211        | HZGJ                                           | EFIEGVSQFSVK       | d                        |
| IP00465211        | HZGJ                                           | GDKEQK             | cg; d                    |
| IP00465211        | HZGJ                                           | IYDMDK             | d                        |
| IP00465211        | HZGJ                                           | TIINADKDGDR        | d                        |
| IP00465211        | HZGJ                                           | VIDIFDTDGNVEVDFK   | d                        |
| IP00385252        | Ig kappa chain V-III region GOL                | ATLSRAALLSSR       | d                        |
| IP00166866        | IGHA1 protein                                  | SAVQGPDR           | c                        |
| IP00166866        | IGHA1 protein                                  | VAAEDWK            | d                        |
| IP00382938        | IGLV4-3 protein                                | AGVETTTFSK         | d                        |
| IP00382938        | IGLV4-3 protein                                | YAASSYLSLTPEQWK    | c                        |
| IP00168887        | IL-17RE                                        | HKMPAPAQR          | a                        |
| IP00301255        | Immunoglobulin superfamily member 21 precursor | LIVFENPNIPR        | d; e                     |
| IP00749009        | Immunoglobulin-like domain containing protein  | DEGLYECR           | c                        |
| IP00001639        | Importin beta-1 subunit                        | AQYQQR             | e                        |
| IP00001639        | Importin beta-1 subunit                        | SNEILTAHQGMR       | e                        |
| IP00001639        | Importin beta-1 subunit                        | WLAIANAR           | e                        |
| IP00170791        | InaD-like protein                              | DKNGLGLSLAGNKDR    | a                        |
| IP00170791        | InaD-like protein                              | NCGNSVR            | a                        |
| IP00292326        | Infertility-related sperm protein              | FDVEKELKIDEDYK     | a                        |
| IP00292326        | Infertility-related sperm protein              | KPAEPAGAAR         | a                        |
| IP00292326        | Infertility-related sperm protein              | TVIDKSHLSKIETR     | a                        |
| IP00024970        | Inner centromere protein                       | KAAEAKR            | a                        |

| IPI Accession No. | Protein Description                                         | Peptide Sequence*      | Primary Source Dataset** |
|-------------------|-------------------------------------------------------------|------------------------|--------------------------|
| IP100024970       | Inner centromere protein                                    | LAKKTAEEPAASGR         | a                        |
| IP100024970       | Inner centromere protein                                    | LRWLQEEEERR            | a                        |
| IP100291607       | Inositol 1,4,5-trisphosphate receptor type                  | AQQETK                 | a                        |
| IP100291607       | Inositol 1,4,5-trisphosphate receptor type                  | GDASDFKAAGMGAQGR       | a                        |
| IP100291607       | Inositol 1,4,5-trisphosphate receptor type                  | MAYVNFVNHCVYDTEVE      | a                        |
| IP100291607       | Inositol 1,4,5-trisphosphate receptor type                  | SFINLMSDK              | a                        |
| IP100020906       | Inositol monophosphatase                                    | EIQVIPLQR              | c                        |
| IP100020906       | Inositol monophosphatase                                    | EIQVIPLQRDDED          | d                        |
| IP100020906       | Inositol monophosphatase                                    | MLISSIK                | c                        |
| IP100020906       | Inositol monophosphatase                                    | YPSHSFGIEESVAGEK       | d                        |
| IP100464978       | Insulin receptor substrate 2 insertion mutant (Fragment)    | GGPAGGDEATAGGSAIQPPR   | d; e                     |
| IP100020729       | Insulin receptor substrate 4                                | SPFEDSRGYMMMFPR        | a                        |
| IP100297284       | Insulin-like growth factor binding protein 2                | GECWCVNPNTGK           | a                        |
| IP100297284       | Insulin-like growth factor binding protein 2                | HGLYNLK                | a                        |
| IP100297284       | Insulin-like growth factor binding protein 2                | LAACGPPVAPPAVAAA       | a                        |
| IP100297284       | Insulin-like growth factor binding protein 2                | MPCALVR                | a                        |
| IP100297284       | Insulin-like growth factor binding protein 4                | GELDCHQLADSFRE         | a                        |
| IP100305380       | Insulin-like growth factor binding protein 4                | HSAPEMR                | a                        |
| IP100029236       | Insulin-like growth factor binding protein 5                | HSAPEMRQSEEGPCRR       | a                        |
| IP100029236       | Insulin-like growth factor binding protein 5                | ITVVDALHEIPVK          | a                        |
| IP100016915       | Insulin-like growth factor binding protein 7                | MYFANPK                | a                        |
| IP100027232       | Insulin-like growth factor 1 receptor                       | NLTIK                  | a; d                     |
| IP100027232       | Insulin-like growth factor 1 receptor                       | VAGLESIGDLFPNLTVIR     | a                        |
| IP100027232       | Insulin-like growth factor 1 receptor                       | EASNCFAIR              | a                        |
| IP100477987       | Integral membrane protein 2B                                | FAVETLICS              | a                        |
| IP100477987       | Integral membrane protein 2B                                | DVVERIK                | a                        |
| IP100412694       | Integral membrane protein GDD1                              | MGDPDLLEVLAEEGEK       | a                        |
| IP100412694       | Integral membrane protein GDD1                              | QNGENSIIVTCGHR         | a                        |
| IP100009803       | Integrin alpha-4 precursor                                  | SAMQTLKGVIR            | a                        |
| IP100009803       | Integrin alpha-4 precursor                                  | VSGAQK                 | c                        |
| IP100218987       | Integrin alpha-D precursor                                  | NVAVTVEYGPR            | d                        |
| IP100743302       | intercellular adhesion molecule 5 precursor                 | SWTWPEGPEQTLR          | e                        |
| IP100743302       | intercellular adhesion molecule 5 precursor                 | ARPDNERQKDR            | a                        |
| IP100154813       | Interleukin 13 receptor alpha 1-binding                     | DQDQKICAVK             | a                        |
| IP100154813       | Interleukin 13 receptor alpha 1-binding                     | MTGFMK                 | a                        |
| IP100154813       | Interleukin 13 receptor alpha 1-binding                     | NTEDRGDAEIKER          | a                        |
| IP100479853       | Interleukin 23 receptor isoform 3 F3 (Fragment)             | ENTGPLETR              | d                        |
| IP100304986       | Interleukin-1 receptor-associated                           | DFSTSIK                | a                        |
| IP100304986       | Interleukin-1 receptor-associated                           | KAEDQEEGQPVV           | a                        |
| IP100304986       | Interleukin-1 receptor-associated                           | LAHPMAHLCPVNR          | a                        |
| IP100304986       | Interleukin-1 receptor-associated                           | SPVYLK                 | a                        |
| IP100002316       | Interleukin-17C precursor                                   | ETAALNSVR              | d                        |
| IP100296866       | interphotoreceptor matrix proteoglycan 2                    | SDQADAILR              | c                        |
| IP100034309       | Inversin protein                                            | AGASLPPHDSHWKPSR       | a                        |
| IP100034309       | Inversin protein                                            | HPSVKDDSDLEGRTSFM      | a                        |
| IP100034309       | Inversin protein                                            | NLLMKHEQLR             | a                        |
| IP100061273       | IQ motif containing D                                       | EKKISLELR              | c                        |
| IP100419922       | IQ motif containing E                                       | AQELPAPTPSSR           | a                        |
| IP100419922       | IQ motif containing E                                       | EREVLR                 | a                        |
| IP100419922       | IQ motif containing E                                       | KLQTMKTTNLEEMR         | a                        |
| IP100419922       | IQ motif containing E                                       | LSVMESK                | a                        |
| IP100419922       | IQ motif containing E                                       | QIEQLDPSR              | a                        |
| IP100419922       | IQ motif containing E                                       | QKKMGSALLLSR           | a                        |
| IP100419922       | IQ motif containing E                                       | SPCSDGRDAAAR           | a                        |
| IP100413266       | IQ motif containing with AAA domain                         | DESWNFSQDYDPELIK       | a                        |
| IP100413266       | IQ motif containing with AAA domain                         | KELQSEIR               | a                        |
| IP100413266       | IQ motif containing with AAA domain                         | NKEEDEK                | a                        |
| IP100413266       | IQ motif containing with AAA domain                         | NWYAKTPLGK             | a                        |
| IP100413266       | IQ motif containing with AAA domain                         | VTDTWAAALRIQK          | a                        |
| IP100413266       | IQ motif containing with AAA domain                         | YFLKEKLEVIK            | a                        |
| IP100413266       | IQ motif containing with AAA domain                         | YPGKNGLQMLHAFVK        | a                        |
| IP100400792       | Iroquois-class homeodomain protein                          | DSACDESSCIK            | a                        |
| IP100400792       | Iroquois-class homeodomain protein                          | LTMHYPCLEKPR           | a                        |
| IP100400792       | Iroquois-class homeodomain protein                          | MIPGPPASARR            | a                        |
| IP100400792       | Iroquois-class homeodomain protein                          | SPECRMIPGPPASAR        | a                        |
| IP100304082       | Ischorismatase domain containing 1                          | LVLPK                  | d                        |
| IP100385025       | Isocitrate dehydrogenase                                    | CATITPDEAR             | d                        |
| IP100385025       | Isocitrate dehydrogenase                                    | TIEEAAHGVTR            | d                        |
| IP100011107       | Isocitrate dehydrogenase [NADP], mitochondrial precursor    | DIFQEIFDK              | d                        |
| IP100011107       | Isocitrate dehydrogenase [NADP], mitochondrial precursor    | DLAGCHGLSNVK           | c; d                     |
| IP100011107       | Isocitrate dehydrogenase [NADP], mitochondrial precursor    | FKDIFQEIFDK            | d                        |
| IP100011107       | Isocitrate dehydrogenase [NADP], mitochondrial precursor    | GKLDGNQDLIR            | c                        |
| IP100011107       | Isocitrate dehydrogenase [NADP], mitochondrial precursor    | HAHGDQYK               | d                        |
| IP100011107       | Isocitrate dehydrogenase [NADP], mitochondrial precursor    | IHWQFIK                | c; d; e                  |
| IP100011107       | Isocitrate dehydrogenase [NADP], mitochondrial precursor    | IWYEHR                 | c                        |
| IP100011107       | Isocitrate dehydrogenase [NADP], mitochondrial precursor    | LIDDMVAQVLYK           | d                        |
| IP100011107       | Isocitrate dehydrogenase [NADP], mitochondrial precursor    | LVPGWTKPTITGR          | e                        |
| IP100011107       | Isocitrate dehydrogenase [NADP], mitochondrial precursor    | NILGGTVFR              | d; e                     |
| IP100011107       | Isocitrate dehydrogenase [NADP], mitochondrial precursor    | SSGGFVWACK             | d                        |
| IP100011107       | Isocitrate dehydrogenase [NADP], mitochondrial precursor    | VAKPVVEMDGDDEMTR       | d                        |
| IP100011107       | Isocitrate dehydrogenase [NADP], mitochondrial precursor    | VEEFK                  | c; d                     |
| IP100011107       | Isocitrate dehydrogenase [NADP], mitochondrial precursor    | YFDLGLPNR              | d; e                     |
| IP100335068       | isocitrate dehydrogenase 3 (NAD+) gamma isoform b precursor | IAEYAFK                | d                        |
| IP10002606        | Isoform 1 of Adseverin                                      | GASQEEK                | a; c                     |
| IP100237884       | Isoform 1 of A-kinase anchor protein 12                     | AEARPEEQAEASGLK        | d                        |
| IP100237884       | Isoform 1 of A-kinase anchor protein 12                     | ERPPAPSSVFQETK         | c                        |
| IP100237884       | Isoform 1 of A-kinase anchor protein 12                     | EVAIEEPPVITVTELPENR    | c; d                     |
| IP100237884       | Isoform 1 of A-kinase anchor protein 12                     | VKEESQLPGTGGPEDVLQPVQR | e                        |
| IP100033770       | Isoform 1 of Alkylated repair protein alkB homolog 4        | MAAAAEETPEVLR          | d                        |
| IP100550991       | Isoform 1 of Alpha-1-antichymotrypsin precursor             | ITLLSALVETR            | d                        |
| IP100383552       | Isoform 1 of Alpha-endosulfine                              | QEEENPAETGEEK          | d                        |
| IP100305486       | Isoform 1 of Amphiphysin                                    | AEEEFQK                | d; e                     |
| IP100305486       | Isoform 1 of Amphiphysin                                    | AFTIQGAPSDSGPLR        | c; d; e                  |
| IP100305486       | Isoform 1 of Amphiphysin                                    | ATVPAGEVSLLEAK         | d                        |
| IP100305486       | Isoform 1 of Amphiphysin                                    | DEQFEYVQNFK            | d                        |
| IP100305486       | Isoform 1 of Amphiphysin                                    | EIAVLCHK               | d                        |
| IP100305486       | Isoform 1 of Amphiphysin                                    | ESDWLQYR               | d                        |

| IPI Accession No. | Protein Description                                                     | Peptide Sequence*           | Primary Source Dataset** |
|-------------------|-------------------------------------------------------------------------|-----------------------------|--------------------------|
| IPI00305486       | Isoform 1 of Amphiphysin                                                | GLFPENFTR                   | d                        |
| IPI00305486       | Isoform 1 of Amphiphysin                                                | LTESLHEVYEPDWYGR            | e                        |
| IPI00305486       | Isoform 1 of Amphiphysin                                                | QEAEGTR                     | d                        |
| IPI00007834       | Isoform 1 of Ankyrin-2                                                  | EQVQDFSGK                   | d; e                     |
| IPI00152898       | Isoform 1 of AP-1 complex subunit sigma-1A                              | AIEQADLQEEDESPR             | e                        |
| IPI00333383       | Isoform 1 of AP-2 complex subunit beta-1                                | AELNNEK                     | d                        |
| IPI00333383       | Isoform 1 of AP-2 complex subunit beta-1                                | APEVSYQYVYDSILK             | d; e                     |
| IPI00333383       | Isoform 1 of AP-2 complex subunit beta-1                                | DIPNELQFOIK                 | d                        |
| IPI00333383       | Isoform 1 of AP-2 complex subunit beta-1                                | FLELLPK                     | d                        |
| IPI00333383       | Isoform 1 of AP-2 complex subunit beta-1                                | ITEVLCEPLR                  | d                        |
| IPI00333383       | Isoform 1 of AP-2 complex subunit beta-1                                | KPSETQELVQVLSLATQSDSDNPLR   | d                        |
| IPI00333383       | Isoform 1 of AP-2 complex subunit beta-1                                | LAPPLVTLSSGEPEVQVALR        | d                        |
| IPI00333383       | Isoform 1 of AP-2 complex subunit beta-1                                | LHDINAQMVDEQGFLLSLR         | e                        |
| IPI00333383       | Isoform 1 of AP-2 complex subunit beta-1                                | LVYLLMNYAK                  | d                        |
| IPI00333383       | Isoform 1 of AP-2 complex subunit beta-1                                | NINLVQK                     | d                        |
| IPI00333383       | Isoform 1 of AP-2 complex subunit beta-1                                | VFFVK                       | d                        |
| IPI00219840       | Isoform 1 of AP-2 complex subunit sigma-1                               | FILIQNR                     | d; e                     |
| IPI00219840       | Isoform 1 of AP-2 complex subunit sigma-1                               | VYTVDEMFLAGEIR              | d                        |
| IPI00221189       | Isoform 1 of Aquaporin-4                                                | DQSGEVLSSV                  | c; d; e                  |
| IPI00221189       | Isoform 1 of Aquaporin-4                                                | EAFSK                       | c; d; e                  |
| IPI00221189       | Isoform 1 of Aquaporin-4                                                | FKEAFSK                     | c                        |
| IPI00221189       | Isoform 1 of Aquaporin-4                                                | SQVETDILLKPGVVHVIDVDR       | d                        |
| IPI00218019       | Isoform 1 of Basigin precursor                                          | SESVPPVTDWAWYK              | e                        |
| IPI00017292       | Isoform 1 of Beta-catenin                                               | EGLLAIFK                    | d                        |
| IPI00017292       | Isoform 1 of Beta-catenin                                               | NEGVATYAAAVLFR              | d                        |
| IPI00456623       | Isoform 1 of Brevican core protein precursor                            | EACYGDMDFPGVYR              | d                        |
| IPI00456623       | Isoform 1 of Brevican core protein precursor                            | EAELVVAR                    | d                        |
| IPI00456623       | Isoform 1 of Brevican core protein precursor                            | EGLAQR                      | d                        |
| IPI00456623       | Isoform 1 of Brevican core protein precursor                            | ELEAFSPEDNSGR               | d                        |
| IPI00456623       | Isoform 1 of Brevican core protein precursor                            | EYQWGLNDR                   | d; e                     |
| IPI00456623       | Isoform 1 of Brevican core protein precursor                            | FCNPGWDAFGQACYK             | d                        |
| IPI00456623       | Isoform 1 of Brevican core protein precursor                            | FNVCYFR                     | d                        |
| IPI00456623       | Isoform 1 of Brevican core protein precursor                            | GAIYSIPIMEDGGGSSSTPEDPAEAPR | d                        |
| IPI00456623       | Isoform 1 of Brevican core protein precursor                            | GVVFLYR                     | d                        |
| IPI00456623       | Isoform 1 of Brevican core protein precursor                            | SWEEAETQCR                  | d                        |
| IPI00456623       | Isoform 1 of Brevican core protein precursor                            | WEAPQISCVPR                 | d                        |
| IPI00456623       | Isoform 1 of Brevican core protein precursor                            | YEVDTVLR                    | d                        |
| IPI00456623       | Isoform 1 of Brevican core protein precursor                            | YPIQTPR                     | d; e                     |
| IPI00456623       | Isoform 1 of Brevican core protein precursor                            | YPIVTSQR                    | d; e                     |
| IPI00305750       | Isoform 1 of Calpastatin                                                | TEPEK                       | c                        |
| IPI00301317       | Isoform 1 of Catenin delta-2                                            | GLPILVELLR                  | d                        |
| IPI00301317       | Isoform 1 of Catenin delta-2                                            | TSTAFSSPGVDSVPLQR           | d; e                     |
| IPI00550987       | Isoform 1 of Centrosomal protein of 135 kDa                             | ENQDLLDR                    | c                        |
| IPI00211393       | Isoform 1 of Choline transporter-like protein 1                         | LPVPASAPIFFHR               | e                        |
| IPI00375373       | Isoform 1 of CKLF-like MARVEL transmembrane domain-containing protein 5 | TEMAPGASQGDQQ               | e                        |
| IPI00302647       | Isoform 1 of Coiled-coil and C2 domain-containing protein 1A            | GFASITPTYSFATQAPAR          | e                        |
| IPI00743825       | Isoform 1 of COP9 signalosome complex subunit 2                         | AHTDFFFAFK                  | d                        |
| IPI00619928       | Isoform 1 of Discs large homolog 4                                      | DCGFLSQUALSFR               | e                        |
| IPI00619928       | Isoform 1 of Discs large homolog 4                                      | DLLGEEDIPR                  | d; e                     |
| IPI00619928       | Isoform 1 of Discs large homolog 4                                      | DWSSSSGSGQR                 | e                        |
| IPI00619928       | Isoform 1 of Discs large homolog 4                                      | EVAEQGK                     | e                        |
| IPI00619928       | Isoform 1 of Discs large homolog 4                                      | VIEDLSGPYIIVVPAR            | d; e                     |
| IPI00402231       | Isoform 1 of DnaJ homolog subfamily C member 5                          | APEGEETEYFYSPEDELAQLQSDER   | d; e                     |
| IPI00402231       | Isoform 1 of DnaJ homolog subfamily C member 5                          | YHPDKNPDNPEAAADK            | d                        |
| IPI00456925       | Isoform 1 of Drebrin-like protein                                       | NEQESAVHPR                  | d                        |
| IPI00456925       | Isoform 1 of Drebrin-like protein                                       | TWEQQEYVSR                  | e                        |
| IPI00456925       | Isoform 1 of Drebrin-like protein                                       | YQEQGGEASPQR                | c; d; e                  |
| IPI00146935       | Isoform 1 of Dynamin-1-like protein                                     | ALQGAQIAEIR                 | e                        |
| IPI00146935       | Isoform 1 of Dynamin-1-like protein                                     | GHAVNLDVPPVPAR              | d                        |
| IPI00146935       | Isoform 1 of Dynamin-1-like protein                                     | SSLDDLLTESEDMAQR            | d; e                     |
| IPI00021016       | Isoform 1 of Elongation factor Ts, mitochondrial precursor              | GFLNSSELSGLPAGPDR           | e                        |
| IPI00219532       | Isoform 1 of Engulfment and cell motility protein 1                     | MLCEILK                     | d                        |
| IPI00384357       | Isoform 1 of FYVE, RhoGEF and PH domain-containing protein 3            | LSVDPPEER                   | d                        |
| IPI00332155       | Isoform 1 of G protein-regulated inducer of neurite outgrowth 1         | SPCPAAAAPPQGR               | e                        |
| IPI00220754       | Isoform 1 of Gamma-adducin                                              | VGEIEFFGLMR                 | e                        |
| IPI00026314       | Isoform 1 of Gelsolin precursor                                         | ATQVSK                      | c; d                     |
| IPI00026314       | Isoform 1 of Gelsolin precursor                                         | DSQEEEK                     | c                        |
| IPI00026314       | Isoform 1 of Gelsolin precursor                                         | EGGQTAPASTR                 | c; d; e                  |
| IPI00026314       | Isoform 1 of Gelsolin precursor                                         | GASQAGAPQGR                 | c                        |
| IPI00026314       | Isoform 1 of Gelsolin precursor                                         | LFACSNK                     | b; d                     |
| IPI00026314       | Isoform 1 of Gelsolin precursor                                         | LFQVK                       | c                        |
| IPI00025363       | Isoform 1 of Glial fibrillary acidic protein, astrocyte                 | AEMMELNDR                   | c; d; e                  |
| IPI00025363       | Isoform 1 of Glial fibrillary acidic protein, astrocyte                 | AKEPTK                      | c; d                     |
| IPI00025363       | Isoform 1 of Glial fibrillary acidic protein, astrocyte                 | ALAAELNQLR                  | c; d; e; f; g            |
| IPI00025363       | Isoform 1 of Glial fibrillary acidic protein, astrocyte                 | DEMAR                       | c                        |
| IPI00025363       | Isoform 1 of Glial fibrillary acidic protein, astrocyte                 | DNLAQDLATVR                 | c; d; f                  |
| IPI00025363       | Isoform 1 of Glial fibrillary acidic protein, astrocyte                 | EAAVYQALAR                  | c; d; e                  |
| IPI00025363       | Isoform 1 of Glial fibrillary acidic protein, astrocyte                 | ELQEQLAR                    | c; d; e                  |
| IPI00025363       | Isoform 1 of Glial fibrillary acidic protein, astrocyte                 | ETSLDTK                     | c; d                     |
| IPI00025363       | Isoform 1 of Glial fibrillary acidic protein, astrocyte                 | FADLTDAAAR                  | c; d; e; g               |
| IPI00025363       | Isoform 1 of Glial fibrillary acidic protein, astrocyte                 | FASYIEK                     | c; d; e                  |
| IPI00025363       | Isoform 1 of Glial fibrillary acidic protein, astrocyte                 | FLEQGNK                     | c; d; e                  |
| IPI00025363       | Isoform 1 of Glial fibrillary acidic protein, astrocyte                 | GTNESLER                    | c; d; e                  |
| IPI00025363       | Isoform 1 of Glial fibrillary acidic protein, astrocyte                 | HEANDYR                     | c; d                     |
| IPI00025363       | Isoform 1 of Glial fibrillary acidic protein, astrocyte                 | HLQEQDMLNPK                 | c; d; f                  |
| IPI00025363       | Isoform 1 of Glial fibrillary acidic protein, astrocyte                 | HESLEEEIR                   | c; d                     |
| IPI00025363       | Isoform 1 of Glial fibrillary acidic protein, astrocyte                 | IHEEEVR                     | c                        |
| IPI00025363       | Isoform 1 of Glial fibrillary acidic protein, astrocyte                 | ITIPVQTSNQLR                | c; d                     |
| IPI00025363       | Isoform 1 of Glial fibrillary acidic protein, astrocyte                 | ITSAAR                      | c                        |
| IPI00025363       | Isoform 1 of Glial fibrillary acidic protein, astrocyte                 | KIESLEEEIR                  | c; d; f                  |
| IPI00025363       | Isoform 1 of Glial fibrillary acidic protein, astrocyte                 | KLLEGEENR                   | c; d                     |
| IPI00025363       | Isoform 1 of Glial fibrillary acidic protein, astrocyte                 | LADVYQAEIR                  | c; d; e; f; g            |
| IPI00025363       | Isoform 1 of Glial fibrillary acidic protein, astrocyte                 | LALDIEIATVR                 | c; d; e; g               |
| IPI00025363       | Isoform 1 of Glial fibrillary acidic protein, astrocyte                 | LDLER                       | c                        |
| IPI00025363       | Isoform 1 of Glial fibrillary acidic protein, astrocyte                 | LDQLTANSAR                  | c; d; e                  |
| IPI00025363       | Isoform 1 of Glial fibrillary acidic protein, astrocyte                 | LEAENLAAYR                  | c; d; e; g               |
| IPI00025363       | Isoform 1 of Glial fibrillary acidic protein, astrocyte                 | LEAENLAAYRQEADEATLAR        | e                        |

| IPI Accession No. | Protein Description                                                                   | Peptide Sequence*        | Primary Source Dataset** |
|-------------------|---------------------------------------------------------------------------------------|--------------------------|--------------------------|
| IPI00025363       | Isoform 1 of Glial fibrillary acidic protein, astrocyte                               | LEEEGQSLK                | c; d                     |
| IPI00025363       | Isoform 1 of Glial fibrillary acidic protein, astrocyte                               | LEEEGQSLKDEMAR           | c; d; e                  |
| IPI00025363       | Isoform 1 of Glial fibrillary acidic protein, astrocyte                               | LEVER                    | c                        |
| IPI00025363       | Isoform 1 of Glial fibrillary acidic protein, astrocyte                               | LEVERDNLAQDLATVR         | c; d                     |
| IPI00025363       | Isoform 1 of Glial fibrillary acidic protein, astrocyte                               | LGPGTR                   | c                        |
| IPI00025363       | Isoform 1 of Glial fibrillary acidic protein, astrocyte                               | LLEGEENR                 | c; d                     |
| IPI00025363       | Isoform 1 of Glial fibrillary acidic protein, astrocyte                               | LQDETNR                  | c; d; e                  |
| IPI00025363       | Isoform 1 of Glial fibrillary acidic protein, astrocyte                               | MPPPLPTR                 | c                        |
| IPI00025363       | Isoform 1 of Glial fibrillary acidic protein, astrocyte                               | NAELLR                   | c; d                     |
| IPI00025363       | Isoform 1 of Glial fibrillary acidic protein, astrocyte                               | NIVVK                    | d                        |
| IPI00025363       | Isoform 1 of Glial fibrillary acidic protein, astrocyte                               | QEADATLAR                | c; d; e                  |
| IPI00025363       | Isoform 1 of Glial fibrillary acidic protein, astrocyte                               | QEHKDVV                  | c; d                     |
| IPI00025363       | Isoform 1 of Glial fibrillary acidic protein, astrocyte                               | QKLQDETNR                | c; d                     |
| IPI00025363       | Isoform 1 of Glial fibrillary acidic protein, astrocyte                               | QLQSLTCDLESLR            | b; c; d; e; f; g         |
| IPI00025363       | Isoform 1 of Glial fibrillary acidic protein, astrocyte                               | SVSEGHK                  | c; d                     |
| IPI00025363       | Isoform 1 of Glial fibrillary acidic protein, astrocyte                               | TQYEAMASSNMHEAEEWYR      | c; d; e                  |
| IPI00025363       | Isoform 1 of Glial fibrillary acidic protein, astrocyte                               | TVEMRDGEVIK              | c                        |
| IPI00025363       | Isoform 1 of Glial fibrillary acidic protein, astrocyte                               | VDFSLAGALNAGFK           | c; e; g                  |
| IPI0003865        | Isoform 1 of Heat shock cognate 71 kDa protein                                        | ATVEDEK                  | d                        |
| IPI0003865        | Isoform 1 of Heat shock cognate 71 kDa protein                                        | DAGTIAGLNVL              | c; d; e                  |
| IPI0003865        | Isoform 1 of Heat shock cognate 71 kDa protein                                        | DISENKR                  | d                        |
| IPI0003865        | Isoform 1 of Heat shock cognate 71 kDa protein                                        | DNLLGK                   | d                        |
| IPI0003865        | Isoform 1 of Heat shock cognate 71 kDa protein                                        | EDIER                    | c                        |
| IPI0003865        | Isoform 1 of Heat shock cognate 71 kDa protein                                        | EEFEHQK                  | d                        |
| IPI0003865        | Isoform 1 of Heat shock cognate 71 kDa protein                                        | EIAEAYLGK                | c; d; e                  |
| IPI0003865        | Isoform 1 of Heat shock cognate 71 kDa protein                                        | FDDAVVQSDMK              | d                        |
| IPI0003865        | Isoform 1 of Heat shock cognate 71 kDa protein                                        | FELNADLFR                | c; d; e; g               |
| IPI0003865        | Isoform 1 of Heat shock cognate 71 kDa protein                                        | GTLDPVEK                 | d                        |
| IPI0003865        | Isoform 1 of Heat shock cognate 71 kDa protein                                        | IINEPTAAAIAYGLDK         | d; e                     |
| IPI0003865        | Isoform 1 of Heat shock cognate 71 kDa protein                                        | IINEPTAAAIAYGLDKK        | d                        |
| IPI0003865        | Isoform 1 of Heat shock cognate 71 kDa protein                                        | ITINDK                   | d                        |
| IPI0003865        | Isoform 1 of Heat shock cognate 71 kDa protein                                        | LIGDAK                   | d                        |
| IPI0003865        | Isoform 1 of Heat shock cognate 71 kDa protein                                        | MVNHFAEFK                | d                        |
| IPI0003865        | Isoform 1 of Heat shock cognate 71 kDa protein                                        | MVQAEK                   | c; d                     |
| IPI0003865        | Isoform 1 of Heat shock cognate 71 kDa protein                                        | NQTAKEEFQK               | c; d                     |
| IPI0003865        | Isoform 1 of Heat shock cognate 71 kDa protein                                        | NQVAMNPTNTVFDK           | c; d; e                  |
| IPI0003865        | Isoform 1 of Heat shock cognate 71 kDa protein                                        | NSLESYAFNMK              | c; d; e                  |
| IPI0003865        | Isoform 1 of Heat shock cognate 71 kDa protein                                        | NTTPTK                   | c                        |
| IPI0003865        | Isoform 1 of Heat shock cognate 71 kDa protein                                        | QTQITFTYSNDQPGVLIQVVEGER | d                        |
| IPI0003865        | Isoform 1 of Heat shock cognate 71 kDa protein                                        | RFDAAVQSDMK              | c; d                     |
| IPI0003865        | Isoform 1 of Heat shock cognate 71 kDa protein                                        | SFYPEEVSSMLTK            | c; d                     |
| IPI0003865        | Isoform 1 of Heat shock cognate 71 kDa protein                                        | SINPDEAVYGAQAAILSGDK     | d                        |
| IPI0003865        | Isoform 1 of Heat shock cognate 71 kDa protein                                        | SQHDIVLVGGSTR            | c; d; e                  |
| IPI0003865        | Isoform 1 of Heat shock cognate 71 kDa protein                                        | STGKENK                  | c; d                     |
| IPI0003865        | Isoform 1 of Heat shock cognate 71 kDa protein                                        | TVTNAVVTTPAYFNSQR        | d; e                     |
| IPI0003865        | Isoform 1 of Heat shock cognate 71 kDa protein                                        | VCNPTTK                  | c; d                     |
| IPI0003865        | Isoform 1 of Heat shock cognate 71 kDa protein                                        | VEHANDQGNR               | d; e                     |
| IPI0003865        | Isoform 1 of Heat shock cognate 71 kDa protein                                        | VQVEYK                   | d                        |
| IPI0003865        | Isoform 1 of Heat shock cognate 71 kDa protein                                        | VQVEYKGETK               | d                        |
| IPI0003865        | Isoform 1 of Heat shock cognate 71 kDa protein                                        | YKADEK                   | c; d                     |
| IPI0064697        | Isoform 1 of Heme-binding protein 2                                                   | APEDAGPQPGSYEIR          | d                        |
| IPI00329355       | Isoform 1 of Heterogeneous nuclear ribonucleoprotein A/B                              | CGFGLFK                  | c; d                     |
| IPI00216049       | Isoform 1 of Heterogeneous nuclear ribonucleoprotein K                                | NLPLPPPPPR               | d; e                     |
| IPI00018140       | Isoform 1 of Heterogeneous nuclear ribonucleoprotein Q                                | GFCLFVEDHIK              | d                        |
| IPI00003566       | Isoform 1 of Homer protein homolog 1                                                  | QQLAAAYQEAER             | e                        |
| IPI00166048       | Isoform 1 of Immunoglobulin superfamily member 4B precursor                           | EGSVPLK                  | e                        |
| IPI00166048       | Isoform 1 of Immunoglobulin superfamily member 4B precursor                           | GNPVPQYLWEK              | e                        |
| IPI00656071       | Isoform 1 of Import inner membrane translocase subunit TIM50, mitochondrial precursor | IPDEFDNDPILVQQLR         | d; e                     |
| IPI00030702       | Isoform 1 of Isocitrate dehydrogenase [NAD] subunit alpha, mitochondrial precursor    | DMANPTALLSIVMMLR         | d                        |
| IPI00030702       | Isoform 1 of Isocitrate dehydrogenase [NAD] subunit alpha, mitochondrial precursor    | ENTEGETSGIEHIVDGVVQSIIK  | d                        |
| IPI00030702       | Isoform 1 of Isocitrate dehydrogenase [NAD] subunit alpha, mitochondrial precursor    | IAEFAFEYAR               | d                        |
| IPI00030702       | Isoform 1 of Isocitrate dehydrogenase [NAD] subunit alpha, mitochondrial precursor    | IEAACFATIK               | d                        |
| IPI00030702       | Isoform 1 of Isocitrate dehydrogenase [NAD] subunit alpha, mitochondrial precursor    | IFDAAK                   | d; e                     |
| IPI00030702       | Isoform 1 of Isocitrate dehydrogenase [NAD] subunit alpha, mitochondrial precursor    | MSDGLFLQK                | d                        |
| IPI00030702       | Isoform 1 of Isocitrate dehydrogenase [NAD] subunit alpha, mitochondrial precursor    | NVTAIQPGGK               | c; d; e                  |
| IPI00030702       | Isoform 1 of Isocitrate dehydrogenase [NAD] subunit alpha, mitochondrial precursor    | TPIAAGHPSMNLRL           | d                        |
| IPI00030702       | Isoform 1 of Isocitrate dehydrogenase [NAD] subunit alpha, mitochondrial precursor    | TPYTDVNVITR              | d                        |
| IPI00030702       | Isoform 1 of Isocitrate dehydrogenase [NAD] subunit alpha, mitochondrial precursor    | WMIPSEAK                 | e                        |
| IPI00395833       | Isoform 1 of Kin of IRRE-like protein 2 precursor                                     | AEAGLSGLR                | d                        |
| IPI00465128       | Isoform 1 of Large proline-rich protein BAT3                                          | DELEAVEQESYR             | e                        |
| IPI00000861       | Isoform 1 of LIM and SH3 domain protein 1                                             | DSQDGSYR                 | d                        |
| IPI00000861       | Isoform 1 of LIM and SH3 domain protein 1                                             | EPAAPVSIQR               | d                        |
| IPI00000861       | Isoform 1 of LIM and SH3 domain protein 1                                             | QSFMTVAIDPENLR           | d                        |
| IPI00000861       | Isoform 1 of LIM and SH3 domain protein 1                                             | SAPGGGK                  | d                        |
| IPI00000861       | Isoform 1 of LIM and SH3 domain protein 1                                             | VNCLDK                   | d                        |
| IPI00099838       | Isoform 1 of Lysophosphatidic acid phosphatase type 6 precursor                       | EQVPR                    | e                        |
| IPI00017802       | Isoform 1 of Methylglutaryl-CoA hydratase, mitochondrial precursor                    | SEVPGIFCAGADLK           | c                        |
| IPI00396171       | Isoform 1 of Microtubule-associated protein 4                                         | ASPSKPASAPSR             | d                        |
| IPI00396171       | Isoform 1 of Microtubule-associated protein 4                                         | TTTAAAVSTGPPSR           | d                        |
| IPI00396171       | Isoform 1 of Microtubule-associated protein 4                                         | TTTSLGTAPAAGVPSR         | d                        |
| IPI00017597       | Isoform 1 of Microtubule-associated protein RPEB family member 3                      | FFDANYDGK                | e                        |
| IPI00556079       | Isoform 1 of Myelin-oligodendrocyte glycoprotein precursor                            | LQGFLEELRNP              | e                        |
| IPI00016807       | Isoform 1 of NAD-dependent deacetylase siruin-5                                       | GVPVAEFTTETPATNR         | e                        |
| IPI0008144        | Isoform 1 of Neurabin-1                                                               | QEAERK                   | d                        |
| IPI00442299       | Isoform 1 of Neuropilin-1-alpha precursor                                             | EPYGSAAVIR               | d                        |
| IPI00008944       | Isoform 1 of Neuroendocrine protein 7B2 precursor                                     | TADDGCLNTPDIAEFSR        | c                        |
| IPI00513705       | Isoform 1 of Neurofascin precursor                                                    | AQAQPIQLTDLVGMVYTLR      | e                        |
| IPI00513705       | Isoform 1 of Neurofascin precursor                                                    | AYLTVLADQATPTNR          | e                        |
| IPI00513705       | Isoform 1 of Neurofascin precursor                                                    | EVAGDTIIFR               | d; e                     |
| IPI00383581       | Isoform 1 of Neutral alpha-glucosidase AB precursor                                   | DPAEGDGAQPEETPR          | d; e                     |
| IPI00100197       | Isoform 1 of NSFL1 cofactor p47                                                       | EFVAVTGAEDDR             | d                        |
| IPI00100197       | Isoform 1 of NSFL1 cofactor p47                                                       | QEALR                    | c                        |
| IPI00100197       | Isoform 1 of NSFL1 cofactor p47                                                       | SYQDPSNAQFLESIR          | c; e                     |
| IPI00738813       | Isoform 1 of Oxidation resistance protein 1                                           | DAGNDSASTAPR             | d; e                     |
| IPI00738813       | Isoform 1 of Oxidation resistance protein 1                                           | DSDGQVFGALASEPLK         | d                        |
| IPI00738813       | Isoform 1 of Oxidation resistance protein 1                                           | ENIQVYSQK                | d                        |
| IPI00738813       | Isoform 1 of Oxidation resistance protein 1                                           | EQNQDSQTEAEELR           | d; e                     |

| IPI Accession No. | Protein Description                                                                     | Peptide Sequence*           | Primary Source Dataset** |
|-------------------|-----------------------------------------------------------------------------------------|-----------------------------|--------------------------|
| IPI00738813       | Isoform 1 of Oxidation resistance protein 1                                             | IEESETIEDSSNQAAAR           | d                        |
| IPI00738813       | Isoform 1 of Oxidation resistance protein 1                                             | KIEESETIEDSSNQAAAR          | d                        |
| IPI00479643       | Isoform 1 of p130Cas-associated protein                                                 | NVFELEDVDR                  | e                        |
| IPI00479643       | Isoform 1 of p130Cas-associated protein                                                 | SAGSASTAGAPPSELPFGPGER      | e                        |
| IPI00479643       | Isoform 1 of p130Cas-associated protein                                                 | SPPPPPPR                    | e                        |
| IPI00301023       | Isoform 1 of Paralemmin                                                                 | ADEVTLSEAGTAGAAETR          | d; e                     |
| IPI00301023       | Isoform 1 of Paralemmin                                                                 | APAPSPAK                    | e                        |
| IPI00301023       | Isoform 1 of Paralemmin                                                                 | ENAAAPSPVR                  | d; e                     |
| IPI00301023       | Isoform 1 of Paralemmin                                                                 | EPAPPNGSAAEPPTTEAASR        | d; e                     |
| IPI00301023       | Isoform 1 of Paralemmin                                                                 | GAVEGAAR                    | d; e                     |
| IPI00301023       | Isoform 1 of Paralemmin                                                                 | QAEIENK                     | c; d                     |
| IPI00301023       | Isoform 1 of Paralemmin                                                                 | QMDDDEQK                    | d                        |
| IPI00301023       | Isoform 1 of Paralemmin                                                                 | VYEDETK                     | c; d; e                  |
| IPI00301023       | Isoform 1 of Paralemmin                                                                 | WLLEGTTPSSASEGDEDLR         | d; e                     |
| IPI00301023       | Isoform 1 of Paralemmin                                                                 | WLLEGTTPSSASEGDEDLRR        | e                        |
| IPI00064665       | Isoform 1 of PHD finger protein 1                                                       | SETVYPGNR                   | e                        |
| IPI00032150       | Isoform 1 of Phosphatidate cytidylyltransferase 2                                       | AESAPLPYSADDTPEVLNR         | d; e                     |
| IPI00216470       | Isoform 1 of Phosphatidylinositol-4-phosphate 5-kinase type-2 beta                      | DVEFLAQLK                   | c                        |
| IPI00001734       | Isoform 1 of Phosphoserine aminotransferase                                             | GVGIVLSMSHR                 | c                        |
| IPI00009635       | Isoform 1 of Pleckstrin homology domain-containing family B member 1                    | IGPECHDVOPPEGR              | b; c                     |
| IPI00014898       | Isoform 1 of Plectin-1                                                                  | AEEAAQK                     | e                        |
| IPI00014898       | Isoform 1 of Plectin-1                                                                  | LQEAIGLSAEELQR              | e                        |
| IPI00014898       | Isoform 1 of Plectin-1                                                                  | QLAEDLAQQR                  | e                        |
| IPI00014898       | Isoform 1 of Plectin-1                                                                  | QOEELLAENQR                 | e                        |
| IPI00014898       | Isoform 1 of Plectin-1                                                                  | QQQQMEQER                   | e                        |
| IPI00014898       | Isoform 1 of Plectin-1                                                                  | SIOEELQQLR                  | e                        |
| IPI00014898       | Isoform 1 of Plectin-1                                                                  | VLALPEPSPAAPTLR             | e                        |
| IPI00014898       | Isoform 1 of Plectin-1                                                                  | VPVDVAYQR                   | e                        |
| IPI00014898       | Isoform 1 of Plectin-1                                                                  | WQAVLAQTDVDR                | e                        |
| IPI00031756       | Isoform 1 of Potassium channel subfamily K member 6                                     | LEGPHEARLR                  | c; d                     |
| IPI00164900       | Isoform 1 of Protein C9orf84                                                            | SPSLAK                      | c                        |
| IPI00376689       | Isoform 1 of Protein KIAA1199 precursor                                                 | LFSGSLK                     | d; e                     |
| IPI00059135       | Isoform 1 of Protein phosphatase 1 regulatory subunit 14A                               | GPGGSPGLQK                  | c                        |
| IPI00215680       | Isoform 1 of Protein Wnt-2b precursor                                                   | SVGEGAR                     | c                        |
| IPI00290416       | Isoform 1 of Putative GTP-binding protein PTD004                                        | AFEDDDITHVEGSDPIR           | d                        |
| IPI00028457       | Isoform 1 of Regulator of G-protein signaling 7                                         | FLESEFSENLR                 | e                        |
| IPI00021766       | Isoform 1 of Reticulon-4                                                                | AESAVIVANPR                 | d; e                     |
| IPI00021766       | Isoform 1 of Reticulon-4                                                                | TSVVDLLYWR                  | d; e                     |
| IPI00220967       | Isoform 1 of Ribosome-binding protein 1                                                 | AEGAQNQK                    | d                        |
| IPI00220967       | Isoform 1 of Ribosome-binding protein 1                                                 | KAEGAQNQK                   | d                        |
| IPI00217247       | Isoform 1 of Serine/threonine-protein kinase DCAMK1                                     | SFEALLADLTR                 | d                        |
| IPI00656138       | Isoform 1 of Serine/threonine-protein kinase PAK 1                                      | SVIEPLPVTPTR                | d; e                     |
| IPI00657884       | Isoform 1 of Serologically defined colon cancer antigen 8                               | EMDVTK                      | c                        |
| IPI00009319       | Isoform 1 of SH3 adapter protein SPIN90                                                 | TIGAEMLMELVR                | e                        |
| IPI00305036       | Isoform 1 of Sodium channel protein type 2 alpha subunit                                | QEEEAQAAAAAESAERS           | e                        |
| IPI00028450       | Isoform 1 of Sodium/calcium exchanger 1 precursor                                       | TFFLEIGEPDR                 | d                        |
| IPI00028450       | Isoform 1 of Sodium/calcium exchanger 1 precursor                                       | VIDDEEYEK                   | d; e                     |
| IPI00152505       | Isoform 1 of Solute carrier family 2, facilitated glucose transporter member 14         | AFEGQAHGADR                 | c; d                     |
| IPI00152505       | Isoform 1 of Solute carrier family 2, facilitated glucose transporter member 14         | FLINLR                      | d; e                     |
| IPI00152505       | Isoform 1 of Solute carrier family 2, facilitated glucose transporter member 14         | QTVVLELFR                   | e                        |
| IPI00419565       | Isoform 1 of Stabilin-1 precursor                                                       | VAGLLPLLR                   | c                        |
| IPI00464979       | Isoform 1 of Succinyl-CoA ligase [ADP-forming] beta-chain, mitochondrial precursor      | ALIADSLK                    | d; e                     |
| IPI00464979       | Isoform 1 of Succinyl-CoA ligase [ADP-forming] beta-chain, mitochondrial precursor      | AQVLAGGR                    | e                        |
| IPI00464979       | Isoform 1 of Succinyl-CoA ligase [ADP-forming] beta-chain, mitochondrial precursor      | FQLPI                       | e                        |
| IPI00464979       | Isoform 1 of Succinyl-CoA ligase [ADP-forming] beta-chain, mitochondrial precursor      | ILACDDLDEAAR                | d; e                     |
| IPI00464979       | Isoform 1 of Succinyl-CoA ligase [ADP-forming] beta-chain, mitochondrial precursor      | INFDSNSAYR                  | e                        |
| IPI00464979       | Isoform 1 of Succinyl-CoA ligase [ADP-forming] beta-chain, mitochondrial precursor      | LYSLFLK                     | d                        |
| IPI00413058       | Isoform 1 of Synaptotagmin                                                              | DQGEVGVVEEFPALGAEASNFQPEAPR | d; e                     |
| IPI00413058       | Isoform 1 of Synaptotagmin                                                              | GQAVPASK                    | e                        |
| IPI00413058       | Isoform 1 of Synaptotagmin                                                              | YPTNAPGAFR                  | e                        |
| IPI00084828       | Isoform 1 of Syntaxin-binding protein 1                                                 | DLSQMLK                     | d; e                     |
| IPI00084828       | Isoform 1 of Syntaxin-binding protein 1                                                 | EVLLEDDEDLWIALR             | c; d; e                  |
| IPI00084828       | Isoform 1 of Syntaxin-binding protein 1                                                 | EYPAVR                      | c; d                     |
| IPI00084828       | Isoform 1 of Syntaxin-binding protein 1                                                 | IMHDVIK                     | c                        |
| IPI00084828       | Isoform 1 of Syntaxin-binding protein 1                                                 | ISEQTYQLSR                  | c; d; e                  |
| IPI00084828       | Isoform 1 of Syntaxin-binding protein 1                                                 | LLDTLK                      | d                        |
| IPI00084828       | Isoform 1 of Syntaxin-binding protein 1                                                 | SSASFTTAVSAR                | d; e                     |
| IPI00084828       | Isoform 1 of Syntaxin-binding protein 1                                                 | SVHLSLDFK                   | d                        |
| IPI00084828       | Isoform 1 of Syntaxin-binding protein 1                                                 | VLVVDQLSMR                  | d                        |
| IPI00084828       | Isoform 1 of Syntaxin-binding protein 1                                                 | YETSIGEAR                   | c; d; e                  |
| IPI00160552       | Isoform 1 of Tenascin-R precursor                                                       | AEIENVLYTK                  | d                        |
| IPI00160552       | Isoform 1 of Tenascin-R precursor                                                       | DEEEMMEVSLDATK              | d                        |
| IPI00160552       | Isoform 1 of Tenascin-R precursor                                                       | DVSDTVAFVWIPPR              | d; e                     |
| IPI00160552       | Isoform 1 of Tenascin-R precursor                                                       | GAWWYK                      | d                        |
| IPI00160552       | Isoform 1 of Tenascin-R precursor                                                       | GHEFSIPFVEMK                | d                        |
| IPI00160552       | Isoform 1 of Tenascin-R precursor                                                       | LILNYSR                     | d                        |
| IPI00160552       | Isoform 1 of Tenascin-R precursor                                                       | LNPAETEISLSNVR              | d; e                     |
| IPI00160552       | Isoform 1 of Tenascin-R precursor                                                       | TSYTLTDLEPGAETHSVTAER       | d                        |
| IPI00160552       | Isoform 1 of Tenascin-R precursor                                                       | VVYSTLAGEQYHEVLVPR          | d                        |
| IPI00160552       | Isoform 1 of Tenascin-R precursor                                                       | YEVSVAVR                    | d                        |
| IPI00160552       | Isoform 1 of Tenascin-R precursor                                                       | YGLVGGEGGR                  | d                        |
| IPI00220566       | Isoform 1 of Thioredoxin reductase 2, mitochondrial precursor                           | VAVVDYVEFSPQGTR             | e                        |
| IPI00409698       | Isoform 1 of Transportin-2                                                              | DSQSPNTATQR                 | e                        |
| IPI00375443       | Isoform 1 of Tripartite motif-containing 55                                             | AAVSGK                      | c; d                     |
| IPI00013991       | Isoform 1 of Tropomyosin beta chain                                                     | AMRDEEK                     | c; d                     |
| IPI000656087      | Isoform 1 of Tyrosine-protein phosphatase non-receptor type substrate 1 precursor       | AKPSAPVYSGPAAR              | d; e                     |
| IPI000656087      | Isoform 1 of Tyrosine-protein phosphatase non-receptor type substrate 1 precursor       | AQGSTSTR                    | d                        |
| IPI000656087      | Isoform 1 of Tyrosine-protein phosphatase non-receptor type substrate 1 precursor       | LTCQVEHGDQPAVSK             | d; e                     |
| IPI000656087      | Isoform 1 of Tyrosine-protein phosphatase non-receptor type substrate 1 precursor       | TETASTYENK                  | d                        |
| IPI00470631       | Isoform 1 of Ubiquitinone biosynthesis protein COQ9, mitochondrial precursor            | YTDQGGEEEDYEESEQLQHR        | e                        |
| IPI00019599       | Isoform 1 of Ubiquitin-conjugating enzyme E2 variant 1                                  | LPQPPGQCYSN                 | e                        |
| IPI00077223       | Isoform 1 of UDP-N-acetylglucosamine--peptide N-acetylglucosaminyltransferase 110 kDa s | EYQAGDFEAER                 | e                        |
| IPI00328832       | Isoform 1 of WD-repeat protein 7                                                        | EAAQALLAELR                 | e                        |
| IPI00328832       | Isoform 1 of WD-repeat protein 7                                                        | GPITAVAFAPDGR               | e                        |
| IPI00186452       | Isoform 10 of Sorbin and SH3 domain-containing protein 1                                | ETPSSPASQOETR               | e                        |
| IPI00182540       | Isoform 1ABC of Catenin delta-1                                                         | GYELLFOPEVVR                | e                        |
| IPI00182540       | Isoform 1ABC of Catenin delta-1                                                         | NLAVDAR                     | e                        |



| IPI Accession No. | Protein Description                                             | Peptide Sequence*      | Primary Source Dataset** |
|-------------------|-----------------------------------------------------------------|------------------------|--------------------------|
| IPI00178631       | Isoform 1B of Synaptogyrin-1                                    | AGGAFDPYTLVR           | d; e                     |
| IPI00178631       | Isoform 1B of Synaptogyrin-1                                    | DNPLNEGTDAAAR          | e                        |
| IPI00410215       | Isoform 2 of 3'(2),5'-bisphosphate nucleotidase 1               | LVTDCVAAMNPDAVLR       | d                        |
| IPI00336094       | Isoform 2 of 3-hydroxyacyl-CoA dehydrogenase type-2             | GGIVGMLTPIAR           | e                        |
| IPI00336094       | Isoform 2 of 3-hydroxyacyl-CoA dehydrogenase type-2             | LVAGEMGQNEPDQGGQR      | c; e                     |
| IPI00218836       | Isoform 2 of Acyl-CoA-binding protein                           | AYINK                  | d                        |
| IPI00218836       | Isoform 2 of Acyl-CoA-binding protein                           | EDAMK                  | d                        |
| IPI00218836       | Isoform 2 of Acyl-CoA-binding protein                           | QATVGDINTERPGMLDFTGK   | d                        |
| IPI00218836       | Isoform 2 of Acyl-CoA-binding protein                           | TKPSDEEMLFTVGHYK       | d                        |
| IPI00220797       | Isoform 2 of Alpha-endosulfine                                  | YFDSGDYVMAK            | c; d                     |
| IPI00305279       | Isoform 2 of Ankyrin-2                                          | FWLIDCR                | d; e                     |
| IPI00305279       | Isoform 2 of Ankyrin-2                                          | GGSPHQEPEEPESEHR       | d                        |
| IPI00305279       | Isoform 2 of Ankyrin-2                                          | NPQDEQER               | c; d; e                  |
| IPI00305279       | Isoform 2 of Ankyrin-2                                          | TLEQENFAEVAR           | d                        |
| IPI00021771       | Isoform 2 of Annexin A7                                         | DENQSNHQMAQEDAQR       | c                        |
| IPI00456049       | Isoform 2 of ATP synthase D chain, mitochondrial                | AGLVDDFEK              | d; e                     |
| IPI00456049       | Isoform 2 of ATP synthase D chain, mitochondrial                | LAALPENPPAIDWAYYK      | d                        |
| IPI00456049       | Isoform 2 of ATP synthase D chain, mitochondrial                | NLPFDQMTIEDLNEAPEPK    | e                        |
| IPI00456049       | Isoform 2 of ATP synthase D chain, mitochondrial                | SWNETLTSR              | e                        |
| IPI00295992       | Isoform 2 of ATPase family AAA domain-containing protein 3A     | GEGAGPPPLPPAQPAGEGGDR  | e                        |
| IPI00555659       | Isoform 2 of Autophagy-related protein 9A                       | ALEIIDFFR              | e                        |
| IPI00185438       | Isoform 2 of BR serine/threonine-protein kinase 1               | FQYDISSEGGPEPSPR       | e                        |
| IPI00185438       | Isoform 2 of BR serine/threonine-protein kinase 1               | MIVYLLIDR              | e                        |
| IPI00185438       | Isoform 2 of BR serine/threonine-protein kinase 1               | SPVFSFPEPGAAGDEAR      | e                        |
| IPI00744780       | Isoform 2 of Breast carcinoma amplified sequence 1              | ANFISQETQGAGK          | c; d                     |
| IPI00744780       | Isoform 2 of Breast carcinoma amplified sequence 1              | SPTTSADLK              | c                        |
| IPI00744780       | Isoform 2 of Breast carcinoma amplified sequence 1              | TITPPEPTGAPQK          | c                        |
| IPI00744780       | Isoform 2 of Breast carcinoma amplified sequence 1              | VPGDSQAEAK             | c                        |
| IPI00016786       | Isoform 2 of Cell division control protein 42 homolog precursor | DDPSTIEK               | d                        |
| IPI00016786       | Isoform 2 of Cell division control protein 42 homolog precursor | QKPTPETAEK             | c                        |
| IPI00016786       | Isoform 2 of Cell division control protein 42 homolog precursor | TPFLVLTQIDLR           | d; e                     |
| IPI00455383       | Isoform 2 of Clathrin heavy chain 1                             | AFMTADLPNELLELLEK      | d                        |
| IPI00455383       | Isoform 2 of Clathrin heavy chain 1                             | ALEHFTLDYDIK           | d                        |
| IPI00455383       | Isoform 2 of Clathrin heavy chain 1                             | ANVPSK                 | d                        |
| IPI00455383       | Isoform 2 of Clathrin heavy chain 1                             | AVNVFSK                | d; e                     |
| IPI00455383       | Isoform 2 of Clathrin heavy chain 1                             | AYEFAER                | d; e                     |
| IPI00455383       | Isoform 2 of Clathrin heavy chain 1                             | CNEPAVWSQAK            | d; e                     |
| IPI00455383       | Isoform 2 of Clathrin heavy chain 1                             | DAMQYASESK             | d                        |
| IPI00455383       | Isoform 2 of Clathrin heavy chain 1                             | EALDSYIK               | d                        |
| IPI00455383       | Isoform 2 of Clathrin heavy chain 1                             | EDKLECSSEELGDLVK       | d                        |
| IPI00455383       | Isoform 2 of Clathrin heavy chain 1                             | EHLELFWSR              | d                        |
| IPI00455383       | Isoform 2 of Clathrin heavy chain 1                             | ENPYYSR                | d                        |
| IPI00455383       | Isoform 2 of Clathrin heavy chain 1                             | ESNCYDPER              | d; e                     |
| IPI00455383       | Isoform 2 of Clathrin heavy chain 1                             | ESYVETELFALAK          | d                        |
| IPI00455383       | Isoform 2 of Clathrin heavy chain 1                             | EVCFACVDGK             | d                        |
| IPI00455383       | Isoform 2 of Clathrin heavy chain 1                             | FNALFAOGNYSAAK         | d                        |
| IPI00455383       | Isoform 2 of Clathrin heavy chain 1                             | GQFSTDELVAEVEK         | d                        |
| IPI00455383       | Isoform 2 of Clathrin heavy chain 1                             | GQFSTDELVAEVEKR        | d                        |
| IPI00455383       | Isoform 2 of Clathrin heavy chain 1                             | HDVVFLTK               | d                        |
| IPI00455383       | Isoform 2 of Clathrin heavy chain 1                             | HELIEFR                | d                        |
| IPI00455383       | Isoform 2 of Clathrin heavy chain 1                             | IAAYLFK                | c; d; e                  |
| IPI00455383       | Isoform 2 of Clathrin heavy chain 1                             | IHEGCEPATHNALAK        | d                        |
| IPI00455383       | Isoform 2 of Clathrin heavy chain 1                             | ISGETIFVTAPHEATAGIIVNR | d; e                     |
| IPI00455383       | Isoform 2 of Clathrin heavy chain 1                             | IVLDSNVSEHR            | d                        |
| IPI00455383       | Isoform 2 of Clathrin heavy chain 1                             | IVLYAK                 | c; d                     |
| IPI00455383       | Isoform 2 of Clathrin heavy chain 1                             | IYDSNNPFR              | c; d; e                  |
| IPI00455383       | Isoform 2 of Clathrin heavy chain 1                             | KDPELVGWSVLESNPYR      | d                        |
| IPI00455383       | Isoform 2 of Clathrin heavy chain 1                             | LASTLVHLGEYQAADVGAR    | d                        |
| IPI00455383       | Isoform 2 of Clathrin heavy chain 1                             | LDASESLR               | d                        |
| IPI00455383       | Isoform 2 of Clathrin heavy chain 1                             | LHIEVGTPTTGNQPFK       | d                        |
| IPI00455383       | Isoform 2 of Clathrin heavy chain 1                             | LLLPWLEAR              | d                        |
| IPI00455383       | Isoform 2 of Clathrin heavy chain 1                             | LLYNNVSNFR             | d                        |
| IPI00455383       | Isoform 2 of Clathrin heavy chain 1                             | LTDQLPLHIVCDR          | d; e                     |
| IPI00455383       | Isoform 2 of Clathrin heavy chain 1                             | MYDAK                  | c; d                     |
| IPI00455383       | Isoform 2 of Clathrin heavy chain 1                             | NLILVVR                | d                        |
| IPI00455383       | Isoform 2 of Clathrin heavy chain 1                             | NLQNLILTAIK            | d; e                     |
| IPI00455383       | Isoform 2 of Clathrin heavy chain 1                             | NNLAGAEELFAR           | d; e                     |
| IPI00455383       | Isoform 2 of Clathrin heavy chain 1                             | QLPLVKPYLR             | d                        |
| IPI00455383       | Isoform 2 of Clathrin heavy chain 1                             | RPISADSAIMNPAK         | d                        |
| IPI00455383       | Isoform 2 of Clathrin heavy chain 1                             | SDVPTLALSVYLR          | d                        |
| IPI00455383       | Isoform 2 of Clathrin heavy chain 1                             | SVNESLNNLITTEEDYQALR   | c; d; e                  |
| IPI00455383       | Isoform 2 of Clathrin heavy chain 1                             | SVQNHNNK               | d                        |
| IPI00455383       | Isoform 2 of Clathrin heavy chain 1                             | TLQIFNIEMK             | d                        |
| IPI00455383       | Isoform 2 of Clathrin heavy chain 1                             | TSIDAYDNFNISLAQR       | c; d; e                  |
| IPI00455383       | Isoform 2 of Clathrin heavy chain 1                             | VAANAPK                | d; e                     |
| IPI00455383       | Isoform 2 of Clathrin heavy chain 1                             | VANVELYR               | c; d                     |
| IPI00455383       | Isoform 2 of Clathrin heavy chain 1                             | VGEQAQVVIIDMNDPNSPIR   | d; e                     |
| IPI00455383       | Isoform 2 of Clathrin heavy chain 1                             | VGYTPDWIFLLR           | d; e                     |
| IPI00455383       | Isoform 2 of Clathrin heavy chain 1                             | VIQCFEAETGQVQK         | d; e                     |
| IPI00455383       | Isoform 2 of Clathrin heavy chain 1                             | VMEYINR                | d; e                     |
| IPI00455383       | Isoform 2 of Clathrin heavy chain 1                             | VNPK                   | c                        |
| IPI00455383       | Isoform 2 of Clathrin heavy chain 1                             | YSQPIEGHAASFAQFK       | d                        |
| IPI00455383       | Isoform 2 of Clathrin heavy chain 1                             | VYGAMQLYSVDR           | d; e                     |
| IPI00455383       | Isoform 2 of Clathrin heavy chain 1                             | WLLLTGISAQQR           | d; e                     |
| IPI00455383       | Isoform 2 of Clathrin heavy chain 1                             | YIEIVQK                | d                        |
| IPI00455383       | Isoform 2 of Clathrin heavy chain 1                             | YIQAAACK               | c                        |
| IPI00216641       | Isoform 2 of Contactin-1 precursor                              | AHSDGGDVVSQVK          | d                        |
| IPI00216641       | Isoform 2 of Contactin-1 precursor                              | ASPFVYK                | d; e                     |
| IPI00216641       | Isoform 2 of Contactin-1 precursor                              | AVDLIPWMEYEFK          | d; e                     |
| IPI00216641       | Isoform 2 of Contactin-1 precursor                              | DGEYVVEVR              | d; e                     |
| IPI00216641       | Isoform 2 of Contactin-1 precursor                              | ELTITWAPLSR            | d                        |
| IPI00216641       | Isoform 2 of Contactin-1 precursor                              | FIPLPIPER              | c; d                     |
| IPI00216641       | Isoform 2 of Contactin-1 precursor                              | FGFPFIEQPINTIYPEESLEK  | e                        |
| IPI00216641       | Isoform 2 of Contactin-1 precursor                              | GPPPGGGLR              | d; e                     |
| IPI00216641       | Isoform 2 of Contactin-1 precursor                              | HSIEVPIPR              | c; d                     |
| IPI00216641       | Isoform 2 of Contactin-1 precursor                              | IKTDGAAPNAPSVDVGGGGGR  | d; e                     |
| IPI00216641       | Isoform 2 of Contactin-1 precursor                              | IVESYQIR               | e                        |



| IPI Accession No. | Protein Description                                                                | Peptide Sequence*              | Primary Source Dataset** |
|-------------------|------------------------------------------------------------------------------------|--------------------------------|--------------------------|
| IPI00216641       | Isoform 2 of Contactin-1 precursor                                                 | NDGGIYTCFAENNR                 | e                        |
| IPI00216641       | Isoform 2 of Contactin-1 precursor                                                 | STEATLSFGYLDPPPEERPEVR         | e                        |
| IPI00216641       | Isoform 2 of Contactin-1 precursor                                                 | TDGAAPNVAPSDVGGGGGR            | c; d; e                  |
| IPI00216641       | Isoform 2 of Contactin-1 precursor                                                 | TDPPIEGNMEAR                   | c; d; e                  |
| IPI00216641       | Isoform 2 of Contactin-1 precursor                                                 | VLEPMPTAEISTSGAVLK             | d                        |
| IPI00216641       | Isoform 2 of Contactin-1 precursor                                                 | VQVTSQEYSAR                    | c; d                     |
| IPI00216641       | Isoform 2 of Contactin-1 precursor                                                 | VVATNLTGR                      | e                        |
| IPI00216641       | Isoform 2 of Contactin-1 precursor                                                 | WLLNEFPVFTMDK                  | e                        |
| IPI00604431       | Isoform 2 of Cullin-associated NEDD8-dissociated protein 1                         | ADVHFHVLKLLK                   | d                        |
| IPI00158625       | Isoform 2 of Cysteinyl-RNA synthetase                                              | FWEGDFHR                       | e                        |
| IPI00220137       | Isoform 2 of Cytoplasmic dynein 1 intermediate chain 1                             | SVSTPSEAGSDQSDGLGPLTR          | d; e                     |
| IPI00220137       | Isoform 2 of Cytoplasmic dynein 1 intermediate chain 1                             | VTQVDFLPR                      | e                        |
| IPI00246616       | Isoform 2 of Cytoplasmic linker protein 2                                          | GQAQAEFLK                      | e                        |
| IPI00220698       | Isoform 2 of Dopamine- and cAMP-regulated neuronal phosphoprotein                  | DGSEDDQVEDPALSEPGEPPQRPSPSEPGT | c; e                     |
| IPI00220698       | Isoform 2 of Dopamine- and cAMP-regulated neuronal phosphoprotein                  | LSHSSPEEASPHQR                 | c                        |
| IPI00396437       | Isoform 2 of Drebrin-like protein                                                  | YQEQQGEASPSQR                  | d                        |
| IPI00555883       | Isoform 2 of Dynamins-like protein                                                 | VPSALAPASQEPFAASAEADGK         | e                        |
| IPI00027082       | Isoform 2 of Epsin-1                                                               | AMTLMEVLIK                     | d                        |
| IPI00027082       | Isoform 2 of Epsin-1                                                               | GSLAEAVGSPPPAATPTPPTR          | d; e                     |
| IPI00027082       | Isoform 2 of Epsin-1                                                               | NIVHNSAEIK                     | d                        |
| IPI00027082       | Isoform 2 of Epsin-1                                                               | TALPTSGSSAGELELLAGEVPAR        | d                        |
| IPI00409717       | Isoform 2 of Eukaryotic initiation factor 4A-II                                    | ETQALVLAFTPR                   | d                        |
| IPI00409717       | Isoform 2 of Eukaryotic initiation factor 4A-II                                    | GIYAYGFEKPSAIQQR               | e                        |
| IPI00456677       | Isoform 2 of F-box only protein 38                                                 | IPIGAK                         | d                        |
| IPI00746455       | Isoform 2 of FERM, RhoGEF and pleckstrin domain-containing protein 1               | LGSLSK                         | c                        |
| IPI00029717       | Isoform 2 of Fibrinogen alpha chain precursor                                      | GGSTSYGTGETESPR                | c; d                     |
| IPI00744232       | Isoform 2 of G protein-regulated inducer of neurite outgrowth 1                    | AQPQSGGK                       | d                        |
| IPI00646773       | Isoform 2 of Gelsolin precursor                                                    | DSQEEETALTSK                   | e                        |
| IPI00646773       | Isoform 2 of Gelsolin precursor                                                    | EDAAARK                        | e                        |
| IPI00646773       | Isoform 2 of Gelsolin precursor                                                    | GGVASGFK                       | c                        |
| IPI00646773       | Isoform 2 of Gelsolin precursor                                                    | IEGSK                          | d                        |
| IPI00646773       | Isoform 2 of Gelsolin precursor                                                    | QTQVSLPEGGETPLFK               | c                        |
| IPI00646773       | Isoform 2 of Gelsolin precursor                                                    | SEDCFLDHGK                     | b; c; d                  |
| IPI00646773       | Isoform 2 of Gelsolin precursor                                                    | VVEHPEFLK                      | c; d                     |
| IPI00383815       | Isoform 2 of Glial fibrillary acidic protein, astrocyte                            | KIHHEEVR                       | d                        |
| IPI00383815       | Isoform 2 of Glial fibrillary acidic protein, astrocyte                            | SYVSGEMMVGLAPGR                | d; e; g                  |
| IPI00719611       | Isoform 2 of Glycerol-3-phosphate dehydrogenase, mitochondrial precursor           | DWSPILYIR                      | e                        |
| IPI00719611       | Isoform 2 of Glycerol-3-phosphate dehydrogenase, mitochondrial precursor           | GFTHVDVQR                      | e                        |
| IPI00719611       | Isoform 2 of Glycerol-3-phosphate dehydrogenase, mitochondrial precursor           | LAFLVQAAEALPR                  | e                        |
| IPI00719611       | Isoform 2 of Glycerol-3-phosphate dehydrogenase, mitochondrial precursor           | VIFLVPQK                       | d; e                     |
| IPI00719611       | Isoform 2 of Glycerol-3-phosphate dehydrogenase, mitochondrial precursor           | WPIVGVNR                       | e                        |
| IPI00037070       | Isoform 2 of Heat shock cognate 71 kDa protein                                     | TTPSYVAFTDTER                  | d; e                     |
| IPI00220683       | Isoform 2 of Heterogeneous nuclear ribonucleoprotein D0                            | IFVGGSLPDTPEEK                 | d                        |
| IPI00216746       | Isoform 2 of Heterogeneous nuclear ribonucleoprotein K                             | IDPLEGSEDR                     | d                        |
| IPI00216746       | Isoform 2 of Heterogeneous nuclear ribonucleoprotein K                             | ILDLSSEPIK                     | d                        |
| IPI00216746       | Isoform 2 of Heterogeneous nuclear ribonucleoprotein K                             | QYADVEGF                       | c                        |
| IPI00216746       | Isoform 2 of Heterogeneous nuclear ribonucleoprotein K                             | TDYNASVSPDSSGPER               | d; e                     |
| IPI00220663       | Isoform 2 of Hexokinase-1                                                          | AEMELGLR                       | d; e                     |
| IPI00220663       | Isoform 2 of Hexokinase-1                                                          | ASGVEGADVVK                    | d                        |
| IPI00220663       | Isoform 2 of Hexokinase-1                                                          | ATDCVGHVVTLLR                  | b; d; e                  |
| IPI00220663       | Isoform 2 of Hexokinase-1                                                          | DFNPTATVK                      | c; d                     |
| IPI00220663       | Isoform 2 of Hexokinase-1                                                          | EGLLFEGR                       | d                        |
| IPI00220663       | Isoform 2 of Hexokinase-1                                                          | FLSQIESDR                      | d; e                     |
| IPI00220663       | Isoform 2 of Hexokinase-1                                                          | FNTSDVSAIEK                    | d                        |
| IPI00220663       | Isoform 2 of Hexokinase-1                                                          | GAALITAVGVR                    | d; e                     |
| IPI00220663       | Isoform 2 of Hexokinase-1                                                          | GAAMVTAVAYR                    | d; e                     |
| IPI00220663       | Isoform 2 of Hexokinase-1                                                          | GDFIALDLGGSSFR                 | d                        |
| IPI00220663       | Isoform 2 of Hexokinase-1                                                          | GFLER                          | d                        |
| IPI00220663       | Isoform 2 of Hexokinase-1                                                          | GFIFTK                         | e                        |
| IPI00220663       | Isoform 2 of Hexokinase-1                                                          | GQISEILK                       | d; e                     |
| IPI00220663       | Isoform 2 of Hexokinase-1                                                          | GSLNPGK                        | e                        |
| IPI00220663       | Isoform 2 of Hexokinase-1                                                          | HIDLVEGDEGR                    | d                        |
| IPI00220663       | Isoform 2 of Hexokinase-1                                                          | IDEALITWTK                     | d                        |
| IPI00220663       | Isoform 2 of Hexokinase-1                                                          | ITPELLTR                       | d; e                     |
| IPI00220663       | Isoform 2 of Hexokinase-1                                                          | LALLQVR                        | d; e                     |
| IPI00220663       | Isoform 2 of Hexokinase-1                                                          | LSDELIDIMTR                    | d; e                     |
| IPI00220663       | Isoform 2 of Hexokinase-1                                                          | LVPDSVDR                       | d                        |
| IPI00220663       | Isoform 2 of Hexokinase-1                                                          | MCINTEWGFAGDDGSLEDIR           | d; e                     |
| IPI00220663       | Isoform 2 of Hexokinase-1                                                          | MISGMYLGEIVR                   | d; e                     |
| IPI00220663       | Isoform 2 of Hexokinase-1                                                          | MLPSEVR                        | a; d; e                  |
| IPI00220663       | Isoform 2 of Hexokinase-1                                                          | MLPTFVR                        | d; e                     |
| IPI00220663       | Isoform 2 of Hexokinase-1                                                          | MVSGMYLGELVR                   | d; e                     |
| IPI00220663       | Isoform 2 of Hexokinase-1                                                          | NLIDFTK                        | c; d                     |
| IPI00220663       | Isoform 2 of Hexokinase-1                                                          | QLFEK                          | c; d                     |
| IPI00220663       | Isoform 2 of Hexokinase-1                                                          | SANLVAATLGAILNR                | d; e                     |
| IPI00220663       | Isoform 2 of Hexokinase-1                                                          | SIPDSEK                        | d                        |
| IPI00220663       | Isoform 2 of Hexokinase-1                                                          | TTVGVDSGLYK                    | c; e                     |
| IPI00220663       | Isoform 2 of Hexokinase-1                                                          | VLLVK                          | d                        |
| IPI00220663       | Isoform 2 of Hexokinase-1                                                          | VQVNHKEK                       | d                        |
| IPI00220663       | Isoform 2 of Hexokinase-1                                                          | YLAMR                          | d; e                     |
| IPI00218321       | Isoform 2 of Histone-lysine N-methyltransferase, H3 lysine-9 specific 4            | EAMAALR                        | c                        |
| IPI00332192       | Isoform 2 of Interleukin-25 precursor                                              | ASEDGLNSR                      | c; d                     |
| IPI00607898       | Isoform 2 of Isocitrate dehydrogenase [NAD] subunit alpha, mitochondrial precursor | CSDFTTEICR                     | c; e                     |
| IPI00410210       | Isoform 2 of Latrophilin-1 precursor                                               | GPPPPPPVPPVGGGEEAGGPGGADR      | e                        |
| IPI00514090       | Isoform 2 of Leukotriene A-4 hydrolase                                             | DGETPDPFNSR                    | e                        |
| IPI00386803       | Isoform 2 of LIM and SH3 domain protein 1                                          | GFSVADTELQQR                   | c; e                     |
| IPI00386803       | Isoform 2 of LIM and SH3 domain protein 1                                          | QSELSQSVR                      | d                        |
| IPI00398365       | Isoform 2 of Liprin-alpha-3                                                        | GEGPAIPGDTPPPTPR               | e                        |
| IPI00401448       | Isoform 2 of Long-chain-fatty-acid-CoA ligase 1                                    | LLMDDLK                        | d                        |
| IPI00401448       | Isoform 2 of Long-chain-fatty-acid-CoA ligase 1                                    | AMEDLGR                        | a                        |
| IPI00401448       | Isoform 2 of Long-chain-fatty-acid-CoA ligase 1                                    | VLQTFVPPVVR                    | a                        |
| IPI00102904       | Isoform 2 of Methylglutacetyl-CoA hydratase, mitochondrial precursor               | AVGLISHVLEQNQEGDAAYR           | d                        |
| IPI00102904       | Isoform 2 of Methylglutacetyl-CoA hydratase, mitochondrial precursor               | EFLPQGVAMR                     | e                        |
| IPI00102904       | Isoform 2 of Methylglutacetyl-CoA hydratase, mitochondrial precursor               | LAIHPGGGTQR                    | e                        |
| IPI00102904       | Isoform 2 of Methylglutacetyl-CoA hydratase, mitochondrial precursor               | LEGLLAFK                       | d                        |
| IPI00256861       | Isoform 2 of Microtubule-actin crosslinking factor 1, isoforms 1/2/3/5             | ELQSNQK                        | d                        |
| IPI0052652        | Isoform 2 of Microtubule-associated protein RPEB family member 2                   | ASSSGASK                       | d                        |

| IPi Accession No. | Protein Description                                                                     | Peptide Sequence*         | Primary Source Dataset** |
|-------------------|-----------------------------------------------------------------------------------------|---------------------------|--------------------------|
| IPi00552652       | Isoform 2 of Microtubule-associated protein RPEB family member 2                        | FQDNLDFIQWFK              | d                        |
| IPi00553216       | Isoform 2 of Microtubule-associated protein RPEB family member 3                        | DFYFSK                    | d                        |
| IPi00553216       | Isoform 2 of Microtubule-associated protein RPEB family member 3                        | DYNPLLR                   | d                        |
| IPi00553216       | Isoform 2 of Microtubule-associated protein RPEB family member 3                        | FQDNEFIQWFK               | d                        |
| IPi00553216       | Isoform 2 of Microtubule-associated protein RPEB family member 3                        | QGQDVAPPNPVQQR            | d; e                     |
| IPi00553216       | Isoform 2 of Microtubule-associated protein RPEB family member 3                        | TSPTGPK                   | c; d                     |
| IPi00553216       | Isoform 2 of Microtubule-associated protein RPEB family member 3                        | VLQAAFK                   | d                        |
| IPi00554469       | Isoform 2 of Mitochondrial inner membrane protein                                       | SIQSGPLK                  | e                        |
| IPi00554469       | Isoform 2 of Mitochondrial inner membrane protein                                       | TDHPEIGEGKPTPALSEEASSSSIR | e                        |
| IPi00100956       | Isoform 2 of Myosin-5A                                                                  | SAPEVTAPGAPAYR            | d; e                     |
| IPi00100956       | Isoform 2 of Myosin-5A                                                                  | YVNSQLEEWLR               | e                        |
| IPi00382551       | Isoform 2 of NAD-dependent deacetylase sirtuin-2                                        | CYQNDITLER                | d; e                     |
| IPi00382551       | Isoform 2 of NAD-dependent deacetylase sirtuin-2                                        | ELEDLVR                   | d                        |
| IPi00382551       | Isoform 2 of NAD-dependent deacetylase sirtuin-2                                        | LLEDELTEGVAR              | d; e                     |
| IPi00478450       | Isoform 2 of NADH dehydrogenase [ubiquinone] 1 beta subcomplex subunit 11, mitochondria | IQLPEDE                   | e                        |
| IPi00446235       | Isoform 2 of NADH-cytochrome b5 reductase                                               | APEAWDYGGQVNEEMIR         | d; e                     |
| IPi00446235       | Isoform 2 of NADH-cytochrome b5 reductase                                               | LWYTLDR                   | e                        |
| IPi00446235       | Isoform 2 of NADH-cytochrome b5 reductase                                               | SVGMAGGTGTPMLQVIR         | d                        |
| IPi00221298       | Isoform 2 of NADH-ubiquinone oxidoreductase 51 kDa subunit, mitochondrial precursor     | FAQQHQAR                  | d                        |
| IPi00221298       | Isoform 2 of NADH-ubiquinone oxidoreductase 51 kDa subunit, mitochondrial precursor     | GGTWFAGFGR                | e                        |
| IPi00334532       | Isoform 2 of Neural cell adhesion molecule L1 precursor                                 | AFGAVPVSQWLEDGTTVLQDER    | e                        |
| IPi00334532       | Isoform 2 of Neural cell adhesion molecule L1 precursor                                 | AQLLVGSPGVPVR             | d; e                     |
| IPi00334532       | Isoform 2 of Neural cell adhesion molecule L1 precursor                                 | DATQITQGR                 | e                        |
| IPi00334532       | Isoform 2 of Neural cell adhesion molecule L1 precursor                                 | FQLQATTK                  | d                        |
| IPi00334532       | Isoform 2 of Neural cell adhesion molecule L1 precursor                                 | GALLSNVQPSDTMTVQCEAR      | e                        |
| IPi00334532       | Isoform 2 of Neural cell adhesion molecule L1 precursor                                 | VGEEDDGEYR                | d; e                     |
| IPi00334532       | Isoform 2 of Neural cell adhesion molecule L1 precursor                                 | VSWSPAEDHNAIEK            | e                        |
| IPi00334532       | Isoform 2 of Neural cell adhesion molecule L1 precursor                                 | WMDWNAPOQVYR              | d                        |
| IPi00333777       | Isoform 2 of Neuronal cell adhesion molecule precursor                                  | GEGPASPDR                 | d                        |
| IPi00333777       | Isoform 2 of Neuronal cell adhesion molecule precursor                                  | QPEYAVVQR                 | e                        |
| IPi00018311       | Isoform 2 of Neuroplastin precursor                                                     | FFINK                     | d                        |
| IPi00018311       | Isoform 2 of Neuroplastin precursor                                                     | IVTSEEVIIR                | d                        |
| IPi00018311       | Isoform 2 of Neuroplastin precursor                                                     | SVGYPHFDWIWR              | d; e                     |
| IPi00442297       | Isoform 2 of Neurotrimin precursor                                                      | EQSGDYECASNDVAAPVVR       | d; e                     |
| IPi00220740       | Isoform 2 of Nucleophosmin                                                              | GPSSVEDIK                 | d                        |
| IPi00220740       | Isoform 2 of Nucleophosmin                                                              | MSVQPTVSLGGFEITPPVVL      | d                        |
| IPi00220740       | Isoform 2 of Nucleophosmin                                                              | MTDQEAIQDLWQWR            | d                        |
| IPi00221364       | Isoform 2 of Oral-facial-digital syndrome 1 protein                                     | SITEALR                   | d                        |
| IPi00298348       | Isoform 2 of Oxidation resistance protein 1                                             | ESLPDIDQLSGR              | d; e                     |
| IPi0033317        | Isoform 2 of PC4 and SFRS1-interacting protein                                          | FSSQQAATK                 | d                        |
| IPi00395939       | Isoform 2 of Phosphatidylinositol transfer protein beta isoform                         | WIDLTMEDIR                | e                        |
| IPi00235352       | Isoform 2 of Phosphatidylinositol-4-phosphate 5-kinase type-2 beta                      | FGIDDQYQNSVTR             | e                        |
| IPi00456262       | Isoform 2 of Phosphofurin acidic cluster sorting protein 1                              | GGAGGGPGGAGGSGQR          | e                        |
| IPi00456262       | Isoform 2 of Phosphofurin acidic cluster sorting protein 1                              | SEPPVSEQLDVAGR            | e                        |
| IPi00219478       | Isoform 2 of Phosphoserine aminotransferase                                             | QVYVFGPGPAK               | d                        |
| IPi00215942       | Isoform 2 of Plectin-1                                                                  | EAQEAAAR                  | e                        |
| IPi00098591       | Isoform 2 of Potassium voltage-gated channel subfamily H member 1                       | QEAPK                     | e                        |
| IPi00410073       | Isoform 2 of Probable G-protein coupled receptor 123                                    | EEPSGR                    | e                        |
| IPi00641620       | Isoform 2 of Protein cereblon                                                           | VAACLPIDDVLR              | e                        |
| IPi00746655       | Isoform 2 of Protein FAM62A                                                             | ALTLGALTLPLAR             | e                        |
| IPi00746655       | Isoform 2 of Protein FAM62A                                                             | VQLDLAETDLSQGVAR          | e                        |
| IPi00470888       | Isoform 2 of Protein KIAA0286                                                           | MAGGMK                    | c                        |
| IPi00218108       | Isoform 2 of Protein NDRG2                                                              | LDPTQISFLK                | c; d                     |
| IPi00218108       | Isoform 2 of Protein NDRG2                                                              | MADSGQPQLTQPGK            | e                        |
| IPi00218108       | Isoform 2 of Protein NDRG2                                                              | TASLTSAAVDGNR             | d                        |
| IPi00395771       | Isoform 2 of Protein phosphatase 1 regulatory subunit 7                                 | CLENLEELQSLR              | c                        |
| IPi00395771       | Isoform 2 of Protein phosphatase 1 regulatory subunit 7                                 | DAEDVDLHNYR               | d                        |
| IPi00301311       | Isoform 2 of Protein SET                                                                | YEVTEFDIK                 | c                        |
| IPi00745060       | Isoform 2 of Proto-oncogene serine/threonine-protein kinase Pim-1                       | GALQELAR                  | c                        |
| IPi00216320       | Isoform 2 of Pyridoxal kinase                                                           | GQVLSDELQELYGLR           | d; e                     |
| IPi00216320       | Isoform 2 of Pyridoxal kinase                                                           | VYPLADITPNQFAELLSGR       | d                        |
| IPi00549885       | Isoform 2 of Pyruvate dehydrogenase E1 component subunit beta, mitochondrial precursor  | DAINQGMDEELER             | d; e                     |
| IPi00549885       | Isoform 2 of Pyruvate dehydrogenase E1 component subunit beta, mitochondrial precursor  | DAINQGMDEELERDEK          | c; d; e                  |
| IPi00549885       | Isoform 2 of Pyruvate dehydrogenase E1 component subunit beta, mitochondrial precursor  | DFLPIGK                   | d                        |
| IPi00549885       | Isoform 2 of Pyruvate dehydrogenase E1 component subunit beta, mitochondrial precursor  | DIIFAIK                   | d                        |
| IPi00549885       | Isoform 2 of Pyruvate dehydrogenase E1 component subunit beta, mitochondrial precursor  | ILEDNSIPQVK               | e                        |
| IPi00549885       | Isoform 2 of Pyruvate dehydrogenase E1 component subunit beta, mitochondrial precursor  | IMEGPAFNLDAPAVR           | d; e                     |
| IPi00549885       | Isoform 2 of Pyruvate dehydrogenase E1 component subunit beta, mitochondrial precursor  | TYMGGLOPQVPIVFR           | d; e                     |
| IPi00549885       | Isoform 2 of Pyruvate dehydrogenase E1 component subunit beta, mitochondrial precursor  | VFLLGEEVAQYDGYK           | d; e                     |
| IPi00549885       | Isoform 2 of Pyruvate dehydrogenase E1 component subunit beta, mitochondrial precursor  | VTGADVPMPYAK              | e                        |
| IPi00337790       | Isoform 2 of Ras GTPase-activating protein SyngAP                                       | AGYVGLTVPVATLAGR          | e                        |
| IPi00217943       | Isoform 2 of Ras-related protein Rab-6A                                                 | AGYVVK                    | d                        |
| IPi00298289       | Isoform 2 of Reticulon-4                                                                | GPLPAAPVAPER              | a; c; d; e               |
| IPi00339385       | Isoform 2 of Retinol dehydrogenase 11                                                   | EIQTTTGNQQLVLR            | e                        |
| IPi00218501       | Isoform 2 of Ryanodine receptor 2                                                       | DLYAFPLLR                 | e                        |
| IPi00218501       | Isoform 2 of Ryanodine receptor 2                                                       | EGHIK                     | e                        |
| IPi00067352       | Isoform 2 of Secretory carrier-associated membrane protein 1                            | NVPPGLDEYNPFSDSR          | e                        |
| IPi00306383       | Isoform 2 of Secretory carrier-associated membrane protein 3                            | AQQEFAAGVSNPAVR           | e                        |
| IPi00478460       | Isoform 2 of Secretory carrier-associated membrane protein 5                            | AQEEWTTGAWK               | d                        |
| IPi00153055       | Isoform 2 of Septin-10                                                                  | EQTHTR                    | c                        |
| IPi00022082       | Isoform 2 of Septin-8                                                                   | HYELVR                    | c                        |
| IPi00004560       | Isoform 2 of Serine/threonine-protein kinase DCAMKL1                                    | SPSPSPSPGSLR              | d; e                     |
| IPi00004560       | Isoform 2 of Serine/threonine-protein kinase DCAMKL1                                    | TLSDNVNLPQGVYR            | e                        |
| IPi00293102       | Isoform 2 of Serine/threonine-protein phosphatase 2A regulatory subunit B'              | WIDEPTPVDQPSR             | c; d                     |
| IPi00747748       | Isoform 2 of Serine/threonine-protein phosphatase 2B catalytic subunit alpha isoform    | AHEAQDAGYR                | d                        |
| IPi00747748       | Isoform 2 of Serine/threonine-protein phosphatase 2B catalytic subunit alpha isoform    | AVFPFPHR                  | d                        |
| IPi00747748       | Isoform 2 of Serine/threonine-protein phosphatase 2B catalytic subunit alpha isoform    | EESVVLTLK                 | c                        |
| IPi00747748       | Isoform 2 of Serine/threonine-protein phosphatase 2B catalytic subunit alpha isoform    | EVFDNDGKPR                | c; d                     |
| IPi00747748       | Isoform 2 of Serine/threonine-protein phosphatase 2B catalytic subunit alpha isoform    | GLTPTGMPLPSVLSGGK         | d                        |
| IPi00747748       | Isoform 2 of Serine/threonine-protein phosphatase 2B catalytic subunit alpha isoform    | ITEGASILR                 | d; e                     |
| IPi00747748       | Isoform 2 of Serine/threonine-protein phosphatase 2B catalytic subunit alpha isoform    | ITSFEEAK                  | c; d                     |
| IPi00747748       | Isoform 2 of Serine/threonine-protein phosphatase 2B catalytic subunit alpha isoform    | LEESVALR                  | d; e                     |
| IPi00747748       | Isoform 2 of Serine/threonine-protein phosphatase 2B catalytic subunit alpha isoform    | TLFLLR                    | d                        |
| IPi00747748       | Isoform 2 of Serine/threonine-protein phosphatase 2B catalytic subunit alpha isoform    | TQEHTHTIVR                | c; d                     |
| IPi00290945       | Isoform 2 of Serum paraoxonase/arylesterase 2                                           | LFVYDPNPPSEVL             | d                        |
| IPi00398828       | Isoform 2 of SH3 domain GRB2-like protein B2                                            | DFHTASISFLTPLR            | e                        |
| IPi00398828       | Isoform 2 of SH3 domain GRB2-like protein B2                                            | QTEVLLQPNPSAR             | d; e                     |

| IPI Accession No. | Protein Description                                                                   | Peptide Sequence*               | Primary Source Dataset** |
|-------------------|---------------------------------------------------------------------------------------|---------------------------------|--------------------------|
| IP10039828        | Isoform 2 of SH3 domain GRB2-like protein B2                                          | SQTYYAQCVR                      | e                        |
| IP10039828        | Isoform 2 of SH3 domain GRB2-like protein B2                                          | TELDAHFENLLAR                   | d                        |
| IP10039828        | Isoform 2 of SH3 domain GRB2-like protein B2                                          | VPVTVLELLS                      | e                        |
| IP100298406       | Isoform 2 of Short chain 3-hydroxyacyl-CoA dehydrogenase, mitochondrial precursor     | DTPGFIVNR                       | e                        |
| IP100298406       | Isoform 2 of Short chain 3-hydroxyacyl-CoA dehydrogenase, mitochondrial precursor     | LLVPLYMEAIR                     | e                        |
| IP100298406       | Isoform 2 of Short chain 3-hydroxyacyl-CoA dehydrogenase, mitochondrial precursor     | TFESLVDFSK                      | d                        |
| IP100217532       | Isoform 2 of Sodium/potassium-transporting ATPase subunit beta-1                      | AYGENIYSEK                      | d                        |
| IP100217532       | Isoform 2 of Sodium/potassium-transporting ATPase subunit beta-1                      | DDMIFEDCGDVPSEPK                | d; e                     |
| IP100217532       | Isoform 2 of Sodium/potassium-transporting ATPase subunit beta-1                      | FIWNSEK                         | e                        |
| IP100217532       | Isoform 2 of Sodium/potassium-transporting ATPase subunit beta-1                      | GDFNHER                         | c; d                     |
| IP100217532       | Isoform 2 of Sodium/potassium-transporting ATPase subunit beta-1                      | SYEAYVLNIVR                     | c; d; f; g               |
| IP100217532       | Isoform 2 of Sodium/potassium-transporting ATPase subunit beta-1                      | TEISFRPNPK                      | c; d; e                  |
| IP100217532       | Isoform 2 of Sodium/potassium-transporting ATPase subunit beta-1                      | VAPPGLTQIPQIK                   | c; d; e                  |
| IP100217532       | Isoform 2 of Sodium/potassium-transporting ATPase subunit beta-1                      | VGNVEYFLGNSGPFPLQYPPYQK         | d; e                     |
| IP100217532       | Isoform 2 of Sodium/potassium-transporting ATPase subunit beta-1                      | YKDSAQR                         | c                        |
| IP100217532       | Isoform 2 of Sodium/potassium-transporting ATPase subunit beta-1                      | YNPNVLPVQCTGK                   | d; e                     |
| IP100216508       | Isoform 2 of Sorting nexin-3                                                          | GDDGIFDDNFEER                   | e                        |
| IP100218207       | Isoform 2 of Spectrin beta chain, brain 2                                             | ALAEEDQAGEVER                   | e                        |
| IP100218207       | Isoform 2 of Spectrin beta chain, brain 2                                             | DVEDEILWYTER                    | e                        |
| IP100218207       | Isoform 2 of Spectrin beta chain, brain 2                                             | EQAAALPTLSR                     | e                        |
| IP100218207       | Isoform 2 of Spectrin beta chain, brain 2                                             | GQVLAAYELQR                     | e                        |
| IP100218207       | Isoform 2 of Spectrin beta chain, brain 2                                             | LEQSYEALCELAAR                  | d                        |
| IP100218207       | Isoform 2 of Spectrin beta chain, brain 2                                             | SLDDFQAWLGR                     | e                        |
| IP100218207       | Isoform 2 of Spectrin beta chain, brain 2                                             | VIESTQGLNDLQVGLALQR             | e                        |
| IP100164779       | Isoform 2 of Survival of motor neuron protein-interacting protein 1                   | FCLGK                           | c                        |
| IP100645484       | Isoform 2 of Synaptic vesicle glycoprotein 2A                                         | EELAQQYEAILR                    | d                        |
| IP100645484       | Isoform 2 of Synaptic vesicle glycoprotein 2A                                         | FEEDDDDDFPAPSDGYR               | d; e                     |
| IP100645484       | Isoform 2 of Synaptic vesicle glycoprotein 2A                                         | GGLSDEGEPGGGR                   | d; e                     |
| IP100645484       | Isoform 2 of Synaptic vesicle glycoprotein 2A                                         | GGQYFNDK                        | d                        |
| IP100645484       | Isoform 2 of Synaptic vesicle glycoprotein 2A                                         | HLQAVDYASR                      | d                        |
| IP100645484       | Isoform 2 of Synaptic vesicle glycoprotein 2A                                         | MADGAPLAGVR                     | e                        |
| IP100645484       | Isoform 2 of Synaptic vesicle glycoprotein 2A                                         | VQDEYSR                         | e                        |
| IP100333134       | Isoform 2 of Synaptotagmin-1                                                          | GFEANAPFDR                      | d                        |
| IP100333134       | Isoform 2 of Synaptotagmin-1                                                          | GSVPLFWEQPLQVGSRR               | d                        |
| IP100333134       | Isoform 2 of Synaptotagmin-1                                                          | YDLFSDDYDTSEK                   | d                        |
| IP100221098       | Isoform 2 of Syntaxin-1A                                                              | FMDFFEQVEEIR                    | d                        |
| IP100221098       | Isoform 2 of Syntaxin-1A                                                              | FVEVMSEYNATQSDYR                | e                        |
| IP100221098       | Isoform 2 of Syntaxin-1A                                                              | IAENVEEVK                       | d; e                     |
| IP100221098       | Isoform 2 of Syntaxin-1A                                                              | SIEQSEIQEGLNR                   | d                        |
| IP10052913        | Isoform 2 of Syntaxin-7                                                               | TLNQLGTQPSPELR                  | e                        |
| IP100046057       | Isoform 2 of Syntaxin-binding protein 1                                               | ADDDPTMGEGPK                    | c; d; e                  |
| IP100046057       | Isoform 2 of Syntaxin-binding protein 1                                               | AIVPLLDANVSTYDK                 | d                        |
| IP100046057       | Isoform 2 of Syntaxin-binding protein 1                                               | AVVGEK                          | d; e                     |
| IP100046057       | Isoform 2 of Syntaxin-binding protein 1                                               | DNALLAQLQDK                     | d                        |
| IP100046057       | Isoform 2 of Syntaxin-binding protein 1                                               | EPLPSLEAVYLITPEK                | d                        |
| IP100046057       | Isoform 2 of Syntaxin-binding protein 1                                               | FLMDLR                          | e                        |
| IP100046057       | Isoform 2 of Syntaxin-binding protein 1                                               | HIAEVSQEVTR                     | d                        |
| IP100046057       | Isoform 2 of Syntaxin-binding protein 1                                               | HYPYISTR                        | d                        |
| IP100046057       | Isoform 2 of Syntaxin-binding protein 1                                               | HYQGVTDK                        | d                        |
| IP100046057       | Isoform 2 of Syntaxin-binding protein 1                                               | KMPQYQK                         | d                        |
| IP100046057       | Isoform 2 of Syntaxin-binding protein 1                                               | LAEQIATLCATLK                   | d; e                     |
| IP100046057       | Isoform 2 of Syntaxin-binding protein 1                                               | LIQHAQIPPEDEIITNMAHLGVPIVTDSTLR | d                        |
| IP100046057       | Isoform 2 of Syntaxin-binding protein 1                                               | MNTGEK                          | e                        |
| IP100046057       | Isoform 2 of Syntaxin-binding protein 1                                               | MTDIMTEGITIVDINKR               | e                        |
| IP100046057       | Isoform 2 of Syntaxin-binding protein 1                                               | NKAPGEYR                        | d                        |
| IP100046057       | Isoform 2 of Syntaxin-binding protein 1                                               | SQLLILDR                        | d; e                     |
| IP100046057       | Isoform 2 of Syntaxin-binding protein 1                                               | VEQDLAMGTDAEGEK                 | d; e                     |
| IP100046057       | Isoform 2 of Syntaxin-binding protein 1                                               | VSFEDQAPTME                     | d; e                     |
| IP100181394       | Isoform 2 of Syntaxin-binding protein 6                                               | SAKSAISK                        | c                        |
| IP100554760       | Isoform 2 of Tenascin-R precursor                                                     | DGQEAASFASYDR                   | d                        |
| IP100554760       | Isoform 2 of Tenascin-R precursor                                                     | DSVMVSWSPVASFYDR                | d                        |
| IP100554760       | Isoform 2 of Tenascin-R precursor                                                     | ELIVDAEDTWIR                    | d                        |
| IP100554760       | Isoform 2 of Tenascin-R precursor                                                     | LDSSVVPNTVTEFTIR                | d; e                     |
| IP100554760       | Isoform 2 of Tenascin-R precursor                                                     | SPTSASVSTVIDPTQLVVR             | d; e                     |
| IP100554760       | Isoform 2 of Tenascin-R precursor                                                     | YDFILLK                         | c; d; e                  |
| IP100554760       | Isoform 2 of Tenascin-R precursor                                                     | VFGNVEDEFWGLDNIHR               | d                        |
| IP100023283       | Isoform 2 of Titin                                                                    | IPVPPVAK                        | c                        |
| IP100451401       | Isoform 2 of Triosephosphate isomerase                                                | EAGITEK                         | c; d; e                  |
| IP100216975       | Isoform 2 of Tropomyosin alpha-4 chain                                                | LVILEGELER                      | d                        |
| IP100216975       | Isoform 2 of Tropomyosin alpha-4 chain                                                | MEIQEMQLK                       | d                        |
| IP100409750       | Isoform 2 of Ubiquitin thioesterase protein OTUB1                                     | FFHEIEGGR                       | c; d                     |
| IP100409750       | Isoform 2 of Ubiquitin thioesterase protein OTUB1                                     | GEGGTNPHIFPEGSEPK               | e                        |
| IP100414079       | Isoform 2 of Vacuolar ATP synthase subunit H                                          | HLAAFR                          | d                        |
| IP100414079       | Isoform 2 of Vacuolar ATP synthase subunit H                                          | LLEVSDDPQVLAVAAHDVGEYVR         | d; e                     |
| IP100414079       | Isoform 2 of Vacuolar ATP synthase subunit H                                          | NTAWPYFLPMLNR                   | d                        |
| IP100414079       | Isoform 2 of Vacuolar ATP synthase subunit H                                          | QLQSEQPQTAAAR                   | d                        |
| IP100414079       | Isoform 2 of Vacuolar ATP synthase subunit H                                          | VIEQLGGK                        | d                        |
| IP100414079       | Isoform 2 of Vacuolar ATP synthase subunit H                                          | VSIFDYAR                        | d                        |
| IP100184284       | Isoform 2 of Vacuolar protein sorting 29                                              | VYTVGQFK                        | d                        |
| IP100743576       | Isoform 2 of Vacuolar proton translocating ATPase 116 kDa subunit a isoform 1         | ANIPMDTGENPEVPPFR               | d; e                     |
| IP100743576       | Isoform 2 of Vacuolar proton translocating ATPase 116 kDa subunit a isoform 1         | ASLYPCPETPQER                   | e                        |
| IP100743576       | Isoform 2 of Vacuolar proton translocating ATPase 116 kDa subunit a isoform 1         | DLNPDVNVFQR                     | c; d; e                  |
| IP100743576       | Isoform 2 of Vacuolar proton translocating ATPase 116 kDa subunit a isoform 1         | EINTNQEALK                      | d; e                     |
| IP100743576       | Isoform 2 of Vacuolar proton translocating ATPase 116 kDa subunit a isoform 1         | FLPFSFEHIR                      | d                        |
| IP100743576       | Isoform 2 of Vacuolar proton translocating ATPase 116 kDa subunit a isoform 1         | FTYFGQNVDAVIGITYR               | d; e                     |
| IP100743576       | Isoform 2 of Vacuolar proton translocating ATPase 116 kDa subunit a isoform 1         | GNVFLR                          | d                        |
| IP100743576       | Isoform 2 of Vacuolar proton translocating ATPase 116 kDa subunit a isoform 1         | IBDLQMVNLQTDIHR                 | e                        |
| IP100743576       | Isoform 2 of Vacuolar proton translocating ATPase 116 kDa subunit a isoform 1         | KANIPMDTGENPEVPPFR              | d                        |
| IP100743576       | Isoform 2 of Vacuolar proton translocating ATPase 116 kDa subunit a isoform 1         | LGFEVAGVNR                      | d; e                     |
| IP100743576       | Isoform 2 of Vacuolar proton translocating ATPase 116 kDa subunit a isoform 1         | MQTNQPTTYNPK                    | d; e                     |
| IP100743576       | Isoform 2 of Vacuolar proton translocating ATPase 116 kDa subunit a isoform 1         | NFLELETK                        | d; e                     |
| IP100178744       | Isoform 2 of Very-long-chain specific acyl-CoA dehydrogenase, mitochondrial precursor | GGVVTSNPLGF                     | e                        |
| IP100178744       | Isoform 2 of Very-long-chain specific acyl-CoA dehydrogenase, mitochondrial precursor | GIVNEQLLQR                      | d                        |
| IP100332864       | Isoform 2 of Vesicle-associated membrane protein 1                                    | LQQTQAQVEEYVDIHR                | e                        |
| IP100216024       | Isoform 2 of Voltage-dependent anion-selective channel protein 2                      | GFGEGLYK                        | c                        |
| IP100216024       | Isoform 2 of Voltage-dependent anion-selective channel protein 2                      | LTFDITFSPNTGK                   | d; e                     |
| IP100216024       | Isoform 2 of Voltage-dependent anion-selective channel protein 2                      | LTLTALVDGK                      | e                        |

| IPI Accession No. | Protein Description                                                                    | Peptide Sequence*                        | Primary Source Dataset** |
|-------------------|----------------------------------------------------------------------------------------|------------------------------------------|--------------------------|
| IPI00216024       | Isoform 2 of Voltage-dependent anion-selective channel protein 2                       | NNFAVGVR                                 | d; e                     |
| IPI00216024       | Isoform 2 of Voltage-dependent anion-selective channel protein 2                       | VNSSLGLVGYTQTLRPGVK                      | d; e                     |
| IPI00216024       | Isoform 2 of Voltage-dependent anion-selective channel protein 2                       | YQLDPTASISAK                             | c; d; e                  |
| IPI00294779       | Isoform 2 of Voltage-dependent anion-selective channel protein 3                       | LAEGLK                                   | d; e                     |
| IPI00294779       | Isoform 2 of Voltage-dependent anion-selective channel protein 3                       | LSQNNFALGYK                              | d; e                     |
| IPI00294779       | Isoform 2 of Voltage-dependent anion-selective channel protein 3                       | LTLDTFVPTNGK                             | d                        |
| IPI00294779       | Isoform 2 of Voltage-dependent anion-selective channel protein 3                       | VGLGFELEA                                | e                        |
| IPI00294779       | Isoform 2 of Voltage-dependent anion-selective channel protein 3                       | VNNASLIGLVYQTLRPGVK                      | e                        |
| IPI00294779       | Isoform 2 of Voltage-dependent anion-selective channel protein 3                       | WNTDNTLGTETISWENK                        | e                        |
| IPI00288892       | Isoform 2 of Voltage-dependent T-type calcium channel alpha-1H subunit                 | MTEGAR                                   | c                        |
| IPI00479795       | Isoform 2 of WD-repeat protein 47                                                      | DSTEQQEQEYR                              | e                        |
| IPI00218467       | Isoform 2-4 of Alpha-synuclein                                                         | EGVVAIAEK                                | c; d; e                  |
| IPI00218467       | Isoform 2-4 of Alpha-synuclein                                                         | EGVHVGVATVAEK                            | c; d                     |
| IPI00218467       | Isoform 2-4 of Alpha-synuclein                                                         | EQVTNMGAVVTGVTAVAQK                      | d                        |
| IPI00218467       | Isoform 2-4 of Alpha-synuclein                                                         | QGVAAEAGK                                | d                        |
| IPI00218467       | Isoform 2-4 of Alpha-synuclein                                                         | TVEGAGSIAAATGFK                          | d                        |
| IPI00187164       | Isoform 3 of Actin-binding LIM protein 2                                               | LSYGESQLLSPTTEGDDQDR                     | e                        |
| IPI00220158       | Isoform 3 of Alpha-adducin                                                             | AAVVSPPPTTAPHK                           | d; h                     |
| IPI00220158       | Isoform 3 of Alpha-adducin                                                             | INLQGDIVDR                               | d; e                     |
| IPI00220158       | Isoform 3 of Alpha-adducin                                                             | MLDNLGYR                                 | e                        |
| IPI00220158       | Isoform 3 of Alpha-adducin                                                             | VDENNPEYLR                               | c; d; e                  |
| IPI00220158       | Isoform 3 of Alpha-adducin                                                             | WQIGQEFEALMR                             | d                        |
| IPI00220064       | Isoform 3 of Amiloride-sensitive cation channel 3                                      | ELSMVR                                   | e                        |
| IPI00220735       | Isoform 3 of Ankyrin-2                                                                 | DFPQYFAVSR                               | d; e                     |
| IPI00374128       | Isoform 3 of Calcium-dependent secretion activator 1                                   | DIVTPVQEEVK                              | e                        |
| IPI00374128       | Isoform 3 of Calcium-dependent secretion activator 1                                   | EGDTVFASDDQDR                            | e                        |
| IPI00374128       | Isoform 3 of Calcium-dependent secretion activator 1                                   | TSEGSAGSALGGGAGAGAGVGGGGGSSGSGGAGGLQPSSR | e                        |
| IPI00382576       | Isoform 3 of Caytaxin                                                                  | SEEKPEVAVENR                             | d                        |
| IPI00444938       | Isoform 3 of Discs large homolog 2                                                     | FIEAGQVNDNLGYTSVQSVR                     | e                        |
| IPI00220102       | Isoform 3 of DnaJ homolog subfamily B member 2                                         | AEAGSGGGGFTTFR                           | e                        |
| IPI00220102       | Isoform 3 of DnaJ homolog subfamily B member 2                                         | EGLTGTGTGPSR                             | e                        |
| IPI00235412       | Isoform 3 of Dynamin-1-like protein                                                    | NVASGGGGVGDGVEPTTGNWR                    | e                        |
| IPI00339300       | Isoform 3 of Gamma-glutamyltransferase 4 precursor                                     | LPEDEPAPAPLR                             | d; e                     |
| IPI00220684       | Isoform 3 of Heterogeneous nuclear ribonucleoprotein D0                                | GFCFVLEK                                 | c; d                     |
| IPI00186736       | Isoform 3 of Immunoglobulin superfamily member 8 precursor                             | EVLVPEGLYR                               | d                        |
| IPI00186736       | Isoform 3 of Immunoglobulin superfamily member 8 precursor                             | HAAYSVGWEMAPAGAPGGR                      | d                        |
| IPI00186736       | Isoform 3 of Immunoglobulin superfamily member 8 precursor                             | LVAQLDTEGVSLGPGVEGR                      | d; e                     |
| IPI00186736       | Isoform 3 of Immunoglobulin superfamily member 8 precursor                             | QAPTSPPR                                 | a; d; e                  |
| IPI00186736       | Isoform 3 of Immunoglobulin superfamily member 8 precursor                             | SDLAVEAGAPYAEER                          | c; d; e                  |
| IPI00186736       | Isoform 3 of Immunoglobulin superfamily member 8 precursor                             | STLQEVVGR                                | a; e                     |
| IPI00186736       | Isoform 3 of Immunoglobulin superfamily member 8 precursor                             | SVPEAPVGR                                | c; d; e                  |
| IPI00186736       | Isoform 3 of Immunoglobulin superfamily member 8 precursor                             | VLPDVLQVSAAPPGR                          | d; e                     |
| IPI00186736       | Isoform 3 of Immunoglobulin superfamily member 8 precursor                             | VVAGEVQVQR                               | d; e                     |
| IPI00082310       | Isoform 3 of KH domain-containing, RNA-binding, signal transduction-associated protein | DSLDFSFTHAMQLLTAEIEK                     | d                        |
| IPI00470829       | Isoform 3 of Mitochondrial inner membrane protein                                      | ACNSDNEFTQALTAIPPELTR                    | e                        |
| IPI00470829       | Isoform 3 of Mitochondrial inner membrane protein                                      | LSEQLQFR                                 | c; e                     |
| IPI00470829       | Isoform 3 of Mitochondrial inner membrane protein                                      | SEIQAEQDR                                | e                        |
| IPI00470829       | Isoform 3 of Mitochondrial inner membrane protein                                      | VVSQYHELIVQAR                            | e                        |
| IPI00220154       | Isoform 3 of Myosin-5A                                                                 | VWIPDPEEYWK                              | e                        |
| IPI00443574       | Isoform 3 of Neurofascin precursor                                                     | DDEPLYGNR                                | d                        |
| IPI00443574       | Isoform 3 of Neurofascin precursor                                                     | EDDSLTFGVAER                             | d                        |
| IPI00443574       | Isoform 3 of Neurofascin precursor                                                     | EFTTPEGVSPAPR                            | c; d; e                  |
| IPI00443574       | Isoform 3 of Neurofascin precursor                                                     | GPEPESVIGYSGEDYPR                        | d; e                     |
| IPI00443574       | Isoform 3 of Neurofascin precursor                                                     | LDCPFFGSPITLR                            | d; e                     |
| IPI00441414       | Isoform 3 of Neutral alpha-glucosidase AB precursor                                    | VYSQSKDPAEDGDAQPEETPR                    | d                        |
| IPI00166807       | Isoform 3 of Oxidation resistance protein 1                                            | EWVYSVAEYHR                              | d                        |
| IPI00215943       | Isoform 3 of Plectin-1                                                                 | AQQQAEAR                                 | c                        |
| IPI00215943       | Isoform 3 of Plectin-1                                                                 | ASDSELR                                  | c                        |
| IPI00215943       | Isoform 3 of Plectin-1                                                                 | AYSDFSTGEPATYGELOQR                      | c; d; e                  |
| IPI00215943       | Isoform 3 of Plectin-1                                                                 | GAQEVGER                                 | e                        |
| IPI00215943       | Isoform 3 of Plectin-1                                                                 | QEIQAMPLDQSAVR                           | c                        |
| IPI00215943       | Isoform 3 of Plectin-1                                                                 | QLAEGTAQQR                               | c; e                     |
| IPI00215943       | Isoform 3 of Plectin-1                                                                 | QSAEEQAQAR                               | c                        |
| IPI00218109       | Isoform 3 of Protein NDRG2                                                             | EAEALAR                                  | d                        |
| IPI00418960       | Isoform 3 of Protein NDRG4                                                             | YFLQGMGYMPSAMTR                          | e                        |
| IPI00759705       | Isoform 3 of Protein phosphatase 1 regulatory subunit 7                                | GAGQQSQEMMEVDR                           | e                        |
| IPI00220660       | Isoform 3 of Regulator of G-protein signaling 7                                        | FWLAVEDLK                                | d; e                     |
| IPI00219207       | Isoform 3 of Reticulon-4                                                               | VVDLLVYR                                 | d; e                     |
| IPI00296360       | Isoform 3 of Serine/threonine-protein kinase DCAMK2                                    | GAPSSSGSSSSGPK                           | e                        |
| IPI00181738       | Isoform 3 of Serine/threonine-protein phosphatase 2B catalytic subunit beta isoform    | LFEVGGSPANTR                             | c; d; e                  |
| IPI00181738       | Isoform 3 of Serine/threonine-protein phosphatase 2B catalytic subunit beta isoform    | LTSEEVFDLDIPR                            | d                        |
| IPI00216202       | Isoform 3 of SH3-containing GRB2-like protein 3                                        | TTEVLPQNPAYR                             | d; e                     |
| IPI00216107       | Isoform 3 of Sodium/calcium exchanger 1 precursor                                      | TEEMDGK                                  | c; d                     |
| IPI00059610       | Isoform 3 of Sorting nexin-3                                                           | YSDFEWLR                                 | e                        |
| IPI00237806       | Isoform 3 of Spectrin beta chain, erythrocyte                                          | FLDLLEPLGR                               | e                        |
| IPI00412274       | Isoform 3 of Transmembrane GTPase MFN1                                                 | QLEEEIAR                                 | c                        |
| IPI00443936       | Isoform 3 of Tripartite motif protein 46                                               | AGALEK                                   | e                        |
| IPI00554538       | Isoform 3 of Tripeptidyl-peptidase 1 precursor                                         | AYPDVAALSDGYVWVNSR                       | d                        |
| IPI00554538       | Isoform 3 of Tripeptidyl-peptidase 1 precursor                                         | LFGGNFHAHQASVAR                          | d                        |
| IPI00554538       | Isoform 3 of Tripeptidyl-peptidase 1 precursor                                         | LYQQHGAGLFDVTR                           | d                        |
| IPI00554538       | Isoform 3 of Tripeptidyl-peptidase 1 precursor                                         | VYQQQR                                   | d                        |
| IPI00658002       | Isoform 3 of Tyrosine-protein phosphatase non-receptor type 11                         | ESQSHGDFVLSVR                            | e                        |
| IPI00747624       | Isoform 3 of WD-repeat protein 1                                                       | EWTTTY                                   | e                        |
| IPI00185159       | Isoform 4 of Brain-specific angiogenesis inhibitor 1-associated protein 2              | EGDLITLLVPEAR                            | d; e                     |
| IPI00185159       | Isoform 4 of Brain-specific angiogenesis inhibitor 1-associated protein 2              | ELGDVLFQMAEVHR                           | e                        |
| IPI00383559       | Isoform 4 of Homeodomain-interacting protein kinase 1                                  | SSNPAPR                                  | d                        |
| IPI00607642       | Isoform 4 of Myelin basic protein                                                      | FFGGDR                                   | c; d; e                  |
| IPI00607642       | Isoform 4 of Myelin basic protein                                                      | GAEGQRPGFGYGGGR                          | c; d; e                  |
| IPI00247295       | Isoform 4 of Nespurin-1                                                                | ELIDSR                                   | d                        |
| IPI00394655       | Isoform 4 of Neurofascin precursor                                                     | TSGAPPESNPGDYK                           | c; d; e                  |
| IPI00217249       | Isoform 4 of Serine/threonine-protein kinase DCAMK1                                    | AQPAPPELNSESDYSPSSSETVR                  | d; e                     |
| IPI00217297       | Isoform 4 of Serine/threonine-protein phosphatase 2A regulatory subunit B'             | FPYIQHFK                                 | d                        |
| IPI00219451       | Isoform 5 of Cytosolic acyl coenzyme A thioester hydrolase                             | MIEEAGAIISTR                             | d                        |
| IPI00219451       | Isoform 5 of Cytosolic acyl coenzyme A thioester hydrolase                             | QEQEEGR                                  | d                        |
| IPI00219451       | Isoform 5 of Cytosolic acyl coenzyme A thioester hydrolase                             | QGHAEPOP                                 | c; d                     |
| IPI00219451       | Isoform 5 of Cytosolic acyl coenzyme A thioester hydrolase                             | TNIVTASVDAINFHDK                         | c                        |
| IPI00219451       | Isoform 5 of Cytosolic acyl coenzyme A thioester hydrolase                             | NLEVPVYYSR                               | c; d; e                  |

| IPI Accession No. | Protein Description                                                               | Peptide Sequence*              | Primary Source Dataset** |
|-------------------|-----------------------------------------------------------------------------------|--------------------------------|--------------------------|
| IP00216477        | Isoform 5 of Myelin basic protein                                                 | ASDYK                          | c; d; e                  |
| IP00216477        | Isoform 5 of Myelin basic protein                                                 | DSHHPAR                        | d                        |
| IP00216477        | Isoform 5 of Myelin basic protein                                                 | DTGILDSIGR                     | c; d; e                  |
| IP00216477        | Isoform 5 of Myelin basic protein                                                 | GVDAQGLTSK                     | c; d; e                  |
| IP00216477        | Isoform 5 of Myelin basic protein                                                 | HGFLPR                         | c; d                     |
| IP00216477        | Isoform 5 of Myelin basic protein                                                 | NIVTPR                         | c; d; e                  |
| IP00216477        | Isoform 5 of Myelin basic protein                                                 | TQDENPVHFFK                    | c; d; e                  |
| IP00216477        | Isoform 5 of Myelin basic protein                                                 | YLATASTMHDHAR                  | c; d; e                  |
| IP00215756        | Isoform 5 of Myosin-7A                                                            | FPKFEK                         | d                        |
| IP00411815        | Isoform 5 of Voltage-dependent anion-selective channel protein 2                  | VGLALELEA                      | d                        |
| IP00411815        | Isoform 5 of Voltage-dependent anion-selective channel protein 2                  | WCEYGLTFTEK                    | d                        |
| IP00177936        | Isoform 6 of Dystrobrein alpha                                                    | LAAESSSSQPQQR                  | e                        |
| IP00219666        | Isoform 6 of Myelin-oligodendrocyte glycoprotein precursor                        | ALVGVDELPCRR                   | a; b; c; d; e            |
| IP00183066        | Isoform 7 of Calcium/calmodulin-dependent protein kinase type II beta chain       | FTDEYQLYEDIGK                  | e                        |
| IP00183066        | Isoform 7 of Calcium/calmodulin-dependent protein kinase type II beta chain       | FYFENLLAK                      | e                        |
| IP00183066        | Isoform 7 of Calcium/calmodulin-dependent protein kinase type II beta chain       | TSQSEETR                       | d                        |
| IP00179357        | Isoform 7 of Titin                                                                | ELTEEEK                        | c                        |
| IP00179357        | Isoform 7 of Titin                                                                | NLCTLEFSVNR                    | e                        |
| IP00179357        | Isoform 7 of Titin                                                                | NSVGK                          | c                        |
| IP00179357        | Isoform 7 of Titin                                                                | YPESEELR                       | d                        |
| IP00477765        | Isoform 8 of Neurofascin precursor                                                | MPEDQVAR                       | e                        |
| IP00064591        | Isoform 8 of Sorbin and SH3 domain-containing protein 1                           | SATASFPQPQAQQR                 | e                        |
| IP00470575        | Isoform 9 of Neurofascin precursor                                                | DLELTDLAER                     | d                        |
| IP00470575        | Isoform 9 of Neurofascin precursor                                                | FFNAIK                         | d                        |
| IP00470575        | Isoform 9 of Neurofascin precursor                                                | GPEPESVIGYGEDLPSAPR            | d; e                     |
| IP00470575        | Isoform 9 of Neurofascin precursor                                                | LSPYVNYQFR                     | d; e                     |
| IP00470575        | Isoform 9 of Neurofascin precursor                                                | LTVSWLK                        | d                        |
| IP00470575        | Isoform 9 of Neurofascin precursor                                                | NLLAPGEDGR                     | d; e                     |
| IP00470575        | Isoform 9 of Neurofascin precursor                                                | TPSFMVYFQGTASSQMVLRL           | d; e                     |
| IP00470575        | Isoform 9 of Neurofascin precursor                                                | VIATNEVGGSSHPSLPSER            | d; e                     |
| IP00470575        | Isoform 9 of Neurofascin precursor                                                | VQAENDFGK                      | d; e                     |
| IP00470575        | Isoform 9 of Neurofascin precursor                                                | YVVGQTPVYVYVEIR                | d                        |
| IP00014186        | Isoform A of Alpha-fetoprotein enhancer-binding protein                           | SGLPOK                         | c                        |
| IP00304577        | Isoform A of AP-2 complex subunit alpha-1                                         | ALLISTYIK                      | d                        |
| IP00304577        | Isoform A of AP-2 complex subunit alpha-1                                         | AQEPK                          | e                        |
| IP00304577        | Isoform A of AP-2 complex subunit alpha-1                                         | ASPDLYPMGEWTAR                 | e                        |
| IP00304577        | Isoform A of AP-2 complex subunit alpha-1                                         | DFLTTPLLSVR                    | d                        |
| IP00304577        | Isoform A of AP-2 complex subunit alpha-1                                         | EAEIK                          | d                        |
| IP00304577        | Isoform A of AP-2 complex subunit alpha-1                                         | FFQPTMAAQDFQRR                 | d; e                     |
| IP00304577        | Isoform A of AP-2 complex subunit alpha-1                                         | GLAVFISDIR                     | d                        |
| IP00304577        | Isoform A of AP-2 complex subunit alpha-1                                         | HLCCELLAQF                     | d                        |
| IP00304577        | Isoform A of AP-2 complex subunit alpha-1                                         | MYLFYGNK                       | d                        |
| IP00304577        | Isoform A of AP-2 complex subunit alpha-1                                         | NADVELQQR                      | d                        |
| IP00304577        | Isoform A of AP-2 complex subunit alpha-1                                         | QLSLPQEAQK                     | d                        |
| IP00304577        | Isoform A of AP-2 complex subunit alpha-1                                         | VAILAEK                        | d                        |
| IP00304577        | Isoform A of AP-2 complex subunit alpha-1                                         | YGGYLGEFGNLIAGDPR              | d                        |
| IP00304577        | Isoform A of AP-2 complex subunit alpha-1                                         | YGGAPQALTLK                    | d                        |
| IP00304577        | Isoform A of AP-2 complex subunit alpha-1                                         | YLETADYAIR                     | d                        |
| IP00032230        | Isoform A of Band 4.1-like protein 3                                              | AGAPVPEPKEEQQAQLEQFAAAAAHSTPVR | e                        |
| IP00032230        | Isoform A of Band 4.1-like protein 3                                              | FYPDDPAQLSEDIR                 | e                        |
| IP00032230        | Isoform A of Band 4.1-like protein 3                                              | IMDGESEIFLLESAR                | d; e                     |
| IP00032230        | Isoform A of Band 4.1-like protein 3                                              | NWLDPAK                        | e                        |
| IP00304419        | Isoform A of Isocitrate dehydrogenase [NAD] subunit beta, mitochondrial precursor | EQTEGEYSSLEHESAR               | d                        |
| IP00304419        | Isoform A of Isocitrate dehydrogenase [NAD] subunit beta, mitochondrial precursor | NIANTAMLLSASNMLR               | e                        |
| IP00304419        | Isoform A of Isocitrate dehydrogenase [NAD] subunit beta, mitochondrial precursor | SQAEDVR                        | d                        |
| IP00216526        | Isoform A of Plasma membrane calcium-transporting ATPase 1                        | DYQDVR                         | d; e                     |
| IP00216526        | Isoform A of Plasma membrane calcium-transporting ATPase 1                        | EETPEEELAEVVEIDHAER            | d; e                     |
| IP00216526        | Isoform A of Plasma membrane calcium-transporting ATPase 1                        | GEIEQER                        | d; e                     |
| IP00216526        | Isoform A of Plasma membrane calcium-transporting ATPase 1                        | GQLWFR                         | d; e                     |
| IP00216526        | Isoform A of Plasma membrane calcium-transporting ATPase 1                        | IDENSLTGESDHYK                 | d                        |
| IP00216526        | Isoform A of Plasma membrane calcium-transporting ATPase 1                        | IQESYGDVYGCCTK                 | d                        |
| IP00216526        | Isoform A of Plasma membrane calcium-transporting ATPase 1                        | MVTGDNINAR                     | d; e                     |
| IP00216526        | Isoform A of Plasma membrane calcium-transporting ATPase 1                        | QVVAVTGDGTNDGPAK               | d; e                     |
| IP00216526        | Isoform A of Plasma membrane calcium-transporting ATPase 1                        | TSPNGLSGNPADLER                | d                        |
| IP00216526        | Isoform A of Plasma membrane calcium-transporting ATPase 1                        | TVIEPMASEGLR                   | d                        |
| IP00216526        | Isoform A of Plasma membrane calcium-transporting ATPase 1                        | YGDLLPADGLIQGNDLK              | d; e                     |
| IP00010271        | Isoform A of Ras-related C3 botulinum toxin substrate 1 precursor                 | CVVYVGGDVGK                    | d                        |
| IP00010271        | Isoform A of Ras-related C3 botulinum toxin substrate 1 precursor                 | YLECSALTQR                     | c; e                     |
| IP00044696        | Isoform A2 of Heterogeneous nuclear ribonucleoproteins A2/B1                      | GGGGNFGPGGPGSNFR               | d                        |
| IP00044696        | Isoform A2 of Heterogeneous nuclear ribonucleoproteins A2/B1                      | NMGPGYGGNGYGPGGSGGGYGGRR       | d                        |
| IP00044696        | Isoform A2 of Heterogeneous nuclear ribonucleoproteins A2/B1                      | NYVEQWK                        | d                        |
| IP00514983        | Isoform Alpha of Heat-shock protein 105 kDa                                       | AGGETLANEFSDR                  | d                        |
| IP00514983        | Isoform Alpha of Heat-shock protein 105 kDa                                       | HEVPLYSLLEQTHLK                | d                        |
| IP00514983        | Isoform Alpha of Heat-shock protein 105 kDa                                       | KPYTDCVIVSPSFTDAER             | d                        |
| IP00010252        | Isoform Alpha of Transcription intermediary factor 1-gamma                        | EAEPK                          | e                        |
| IP00220431        | Isoform Alpha-1B-2 of Voltage-dependent N-type calcium channel alpha-1B subunit   | AEAPK                          | c                        |
| IP00216196        | Isoform Alpha-2 of Protein phosphatase 2C isoform alpha                           | GPTEQLVSPPEVHDIER              | d                        |
| IP00219835        | Isoform Alpha-S1 of Guanine nucleotide-binding protein G(i)s, alpha subunit       | QADYVPSDQLLR                   | e                        |
| IP00218591        | Isoform ASF-2 of Splicing factor, arginine/serine-rich 1                          | DAEDAVYGR                      | c; d                     |
| IP00218591        | Isoform ASF-2 of Splicing factor, arginine/serine-rich 1                          | GGGGGGGGGAPR                   | d                        |
| IP00395561        | Isoform B of 1-phosphatidylinositol-4,5-bisphosphate phosphodiesterase beta 1     | DYVPDYADVIALNSPIR              | d; e                     |
| IP00395561        | Isoform B of 1-phosphatidylinositol-4,5-bisphosphate phosphodiesterase beta 1     | EADPGETPEAPSEAR                | c; d; e                  |
| IP00395561        | Isoform B of 1-phosphatidylinositol-4,5-bisphosphate phosphodiesterase beta 1     | LIFGDALLMEPEK                  | d                        |
| IP00395561        | Isoform B of 1-phosphatidylinositol-4,5-bisphosphate phosphodiesterase beta 1     | QEYVSEK                        | d                        |
| IP00395561        | Isoform B of 1-phosphatidylinositol-4,5-bisphosphate phosphodiesterase beta 1     | SVYQEVVQYIK                    | d                        |
| IP00395561        | Isoform B of 1-phosphatidylinositol-4,5-bisphosphate phosphodiesterase beta 1     | VVLTPLACLRL                    | d                        |
| IP00395561        | Isoform B of 1-phosphatidylinositol-4,5-bisphosphate phosphodiesterase beta 1     | WDDSTIVTPILR                   | e                        |
| IP00215716        | Isoform B of Band 4.1-like protein 3                                              | AVLEQEETAASR                   | d; e                     |
| IP00215716        | Isoform B of Band 4.1-like protein 3                                              | DSMSAAEVGTGQVATTK              | d                        |
| IP00215716        | Isoform B of Band 4.1-like protein 3                                              | EVVPIVETIK                     | d                        |
| IP00215716        | Isoform B of Band 4.1-like protein 3                                              | EVTDEKEFAAR                    | c; d; e                  |
| IP00215716        | Isoform B of Band 4.1-like protein 3                                              | TTESGDSSEKPDQEAEPQEAAGAQR      | d; h                     |
| IP00215716        | Isoform B of Band 4.1-like protein 3                                              | VYQETLVVEER                    | d; e                     |
| IP00550056        | Isoform B of Calcium/calmodulin-dependent protein kinase type II alpha chain      | AGAYDFPSPEDWIVTPEAK            | d; e                     |
| IP00550056        | Isoform B of Calcium/calmodulin-dependent protein kinase type II alpha chain      | DLKPNLLASK                     | d                        |
| IP00550056        | Isoform B of Calcium/calmodulin-dependent protein kinase type II alpha chain      | FYFENLWSR                      | c; d; e; f               |
| IP00550056        | Isoform B of Calcium/calmodulin-dependent protein kinase type II alpha chain      | GAILTMLATR                     | d                        |

| IPI Accession No. | Protein Description                                                                        | Peptide Sequence*              | Primary Source Dataset** |
|-------------------|--------------------------------------------------------------------------------------------|--------------------------------|--------------------------|
| IPI00550056       | Isoform B of Calcium/calmodulin-dependent protein kinase type II alpha chain               | ITAAEALK                       | d; e                     |
| IPI00550056       | Isoform B of Calcium/calmodulin-dependent protein kinase type II alpha chain               | ITQYLDAGGIPR                   | d; e; f                  |
| IPI00550056       | Isoform B of Calcium/calmodulin-dependent protein kinase type II alpha chain               | LYQQIK                         | d                        |
| IPI00550056       | Isoform B of Calcium/calmodulin-dependent protein kinase type II alpha chain               | MCDPGMTAFEPALGNLVEGLDFHR       | d                        |
| IPI00550056       | Isoform B of Calcium/calmodulin-dependent protein kinase type II alpha chain               | NFSGGK                         | d; e                     |
| IPI00550056       | Isoform B of Calcium/calmodulin-dependent protein kinase type II alpha chain               | VLAGEYAAK                      | d; e                     |
| IPI00745056       | Isoform B of Neuronal-specific septin-3                                                    | LTVIDTPGFGDQINNENWEIEK         | e                        |
| IPI00745056       | Isoform B of Neuronal-specific septin-3                                                    | YINQYEK                        | d                        |
| IPI00218874       | Isoform B of Osteopontin precursor                                                         | QADSGSSEK                      | e; d                     |
| IPI00215777       | Isoform B of Phosphate carrier protein, mitochondrial precursor                            | FACFER                         | d                        |
| IPI00215777       | Isoform B of Phosphate carrier protein, mitochondrial precursor                            | GIFNGFSVTLK                    | d                        |
| IPI00215777       | Isoform B of Phosphate carrier protein, mitochondrial precursor                            | GVAPLWMR                       | d; e                     |
| IPI00215777       | Isoform B of Phosphate carrier protein, mitochondrial precursor                            | IQTQPGYANTLR                   | d; e                     |
| IPI00215777       | Isoform B of Phosphate carrier protein, mitochondrial precursor                            | LPRPPPEMPESLK                  | d                        |
| IPI00215777       | Isoform B of Phosphate carrier protein, mitochondrial precursor                            | MQVDPQK                        | e                        |
| IPI00215777       | Isoform B of Phosphate carrier protein, mitochondrial precursor                            | MYKEEGLK                       | e                        |
| IPI00215777       | Isoform B of Phosphate carrier protein, mitochondrial precursor                            | TVEALYK                        | d                        |
| IPI00396378       | Isoform B1 of Heterogeneous nuclear ribonucleoproteins A2/B1                               | DYFEEYK                        | d                        |
| IPI00396378       | Isoform B1 of Heterogeneous nuclear ribonucleoproteins A2/B1                               | LFIGGLSFETTESLR                | d                        |
| IPI00219690       | Isoform Beta-2 of Serine/threonine-protein phosphatase 2A 56 kDa regulatory subunit bet    | GVLIPEVYDPIIR                  | e                        |
| IPI00219628       | Isoform Beta-II of Protein kinase C beta type                                              | CSLNPEWNETR                    | e                        |
| IPI00219628       | Isoform Beta-II of Protein kinase C beta type                                              | LLSQEEGYFNVPVPEGSEANEELR       | e                        |
| IPI00219628       | Isoform Beta-II of Protein kinase C beta type                                              | LSVEIWDWDLTNR                  | e                        |
| IPI00014587       | Isoform Brain of Clathrin light chain A                                                    | VADEAFYK                       | d                        |
| IPI00014589       | Isoform Brain of Clathrin light chain B                                                    | AFYQQPDADHGYVASEAFVK           | d                        |
| IPI00014589       | Isoform Brain of Clathrin light chain B                                                    | QSEQVEK                        | d                        |
| IPI00171274       | Isoform C of Myotubularin-related protein 3                                                | ISNINEK                        | d                        |
| IPI00411478       | Isoform C of Neural cell adhesion molecule 1, 120 kDa isoform precursor                    | AGEQDAIHLK                     | d                        |
| IPI00411478       | Isoform C of Neural cell adhesion molecule 1, 120 kDa isoform precursor                    | ALSEWKPEIR                     | e; d                     |
| IPI00411478       | Isoform C of Neural cell adhesion molecule 1, 120 kDa isoform precursor                    | DGEQIEQEDDEK                   | d                        |
| IPI00411478       | Isoform C of Neural cell adhesion molecule 1, 120 kDa isoform precursor                    | DIQIVNVPTTIQAR                 | d; e                     |
| IPI00411478       | Isoform C of Neural cell adhesion molecule 1, 120 kDa isoform precursor                    | NAPITPQEFR                     | e; d                     |
| IPI00413344       | Isoform CFL2b of Cofilin-2                                                                 | YALYDATYETK                    | e; d                     |
| IPI00306667       | Isoform CNPII of 2,3'-cyclic-nucleotide 3'-phosphodiesterase                               | AGQVFEELGNHK                   | d; e                     |
| IPI00306667       | Isoform CNPII of 2,3'-cyclic-nucleotide 3'-phosphodiesterase                               | AIFGYYGK                       | e; d; e                  |
| IPI00306667       | Isoform CNPII of 2,3'-cyclic-nucleotide 3'-phosphodiesterase                               | APGAEYEAQQDVLK                 | e; d; e                  |
| IPI00306667       | Isoform CNPII of 2,3'-cyclic-nucleotide 3'-phosphodiesterase                               | APGAEYEAQQDVLKK                | e                        |
| IPI00306667       | Isoform CNPII of 2,3'-cyclic-nucleotide 3'-phosphodiesterase                               | DFLPLYGFWELTK                  | d                        |
| IPI00306667       | Isoform CNPII of 2,3'-cyclic-nucleotide 3'-phosphodiesterase                               | EKNQWLSADDLK                   | c                        |
| IPI00306667       | Isoform CNPII of 2,3'-cyclic-nucleotide 3'-phosphodiesterase                               | FCDYK                          | b; c; d; e               |
| IPI00306667       | Isoform CNPII of 2,3'-cyclic-nucleotide 3'-phosphodiesterase                               | GAFSEYK                        | e; d; e                  |
| IPI00306667       | Isoform CNPII of 2,3'-cyclic-nucleotide 3'-phosphodiesterase                               | GAFSEYKR                       | c                        |
| IPI00306667       | Isoform CNPII of 2,3'-cyclic-nucleotide 3'-phosphodiesterase                               | GEEVGLSR                       | d; e                     |
| IPI00306667       | Isoform CNPII of 2,3'-cyclic-nucleotide 3'-phosphodiesterase                               | GKVPPTQGSR                     | e; d; e                  |
| IPI00306667       | Isoform CNPII of 2,3'-cyclic-nucleotide 3'-phosphodiesterase                               | GLPGSGK                        | e                        |
| IPI00306667       | Isoform CNPII of 2,3'-cyclic-nucleotide 3'-phosphodiesterase                               | ILVLDTNHER                     | e; d; e                  |
| IPI00306667       | Isoform CNPII of 2,3'-cyclic-nucleotide 3'-phosphodiesterase                               | ITPGAR                         | e                        |
| IPI00306667       | Isoform CNPII of 2,3'-cyclic-nucleotide 3'-phosphodiesterase                               | LDCAQLK                        | b; c; d; e               |
| IPI00306667       | Isoform CNPII of 2,3'-cyclic-nucleotide 3'-phosphodiesterase                               | LDELDAAVCR                     | b; c; d; e; f; g         |
| IPI00306667       | Isoform CNPII of 2,3'-cyclic-nucleotide 3'-phosphodiesterase                               | LSPTDNLPR                      | e; d; e                  |
| IPI00306667       | Isoform CNPII of 2,3'-cyclic-nucleotide 3'-phosphodiesterase                               | MDLVTYFGK                      | e; d; e                  |
| IPI00306667       | Isoform CNPII of 2,3'-cyclic-nucleotide 3'-phosphodiesterase                               | MVSADAYK                       | e; d; e                  |
| IPI00306667       | Isoform CNPII of 2,3'-cyclic-nucleotide 3'-phosphodiesterase                               | NQWQLSADDLK                    | e; d; e                  |
| IPI00306667       | Isoform CNPII of 2,3'-cyclic-nucleotide 3'-phosphodiesterase                               | NQWQLSADDLKK                   | e; d                     |
| IPI00306667       | Isoform CNPII of 2,3'-cyclic-nucleotide 3'-phosphodiesterase                               | QFVPGDEPR                      | e; d; e                  |
| IPI00306667       | Isoform CNPII of 2,3'-cyclic-nucleotide 3'-phosphodiesterase                               | RLDELDAAVCR                    | b; c; d; e               |
| IPI00306667       | Isoform CNPII of 2,3'-cyclic-nucleotide 3'-phosphodiesterase                               | TLFILR                         | e; d; e                  |
| IPI00306667       | Isoform CNPII of 2,3'-cyclic-nucleotide 3'-phosphodiesterase                               | VELSEQQQLWPSDVK                | d; e                     |
| IPI00306667       | Isoform CNPII of 2,3'-cyclic-nucleotide 3'-phosphodiesterase                               | VELSEQQQLWPSDVKLSPTDNLPR       | e                        |
| IPI00306667       | Isoform CNPII of 2,3'-cyclic-nucleotide 3'-phosphodiesterase                               | VIVDK                          | d                        |
| IPI00306667       | Isoform CNPII of 2,3'-cyclic-nucleotide 3'-phosphodiesterase                               | WMLTLAK                        | d; e                     |
| IPI00759715       | Isoform Cytoplasmic of Fumarate hydratase, mitochondrial precursor                         | AFGLK                          | d                        |
| IPI00759715       | Isoform Cytoplasmic of Fumarate hydratase, mitochondrial precursor                         | AIEMLGGELGSK                   | e; d                     |
| IPI00759715       | Isoform Cytoplasmic of Fumarate hydratase, mitochondrial precursor                         | EFAQIK                         | d                        |
| IPI00759715       | Isoform Cytoplasmic of Fumarate hydratase, mitochondrial precursor                         | IEYDTFGELK                     | e; d; e                  |
| IPI00759715       | Isoform Cytoplasmic of Fumarate hydratase, mitochondrial precursor                         | IYELAAGGTAVGTGLNTR             | d; e                     |
| IPI00759715       | Isoform Cytoplasmic of Fumarate hydratase, mitochondrial precursor                         | YYGAQTVR                       | e                        |
| IPI00216279       | Isoform Cytoplasmic of Glycine amidinotransferase, mitochondrial precursor                 | FVTTEEPCEFAADFIIR              | d                        |
| IPI00759663       | Isoform Cytoplasmic-peroxisomal of Peroxisome-5, mitochondrial precursor                   | THLPFGVEQAELK                  | d                        |
| IPI00218977       | Isoform D of Formimidoyltransferase-cyclodeaminase                                         | AGEYEALPKK                     | a                        |
| IPI00218977       | Isoform D of Formimidoyltransferase-cyclodeaminase                                         | LQQADWAPDFGSSFPV               | a                        |
| IPI00218977       | Isoform D of Formimidoyltransferase-cyclodeaminase                                         | QFQSLDTIMRRLPPFR               | a                        |
| IPI00035648       | Isoform Delta of Poliovirus receptor-related protein 1 precursor                           | AGPLGSSSEEEEEEGGGGGER          | e                        |
| IPI00301512       | Isoform DPPX-L of Dipeptidyl aminopeptidase-like protein 6                                 | FFFR                           | d                        |
| IPI00375015       | Isoform DUT-N of Deoxyuridine 5'-triphosphate nucleotidohydrolase, mitochondrial precursor | IFYPEIEVQALDDTER               | d                        |
| IPI00218070       | Isoform GRB3-3 of Growth factor receptor-bound protein 2                                   | NQQIFLR                        | d                        |
| IPI00218070       | Isoform GRB3-3 of Growth factor receptor-bound protein 2                                   | YELWVVK                        | d                        |
| IPI00216095       | Isoform HHT-1 of Voltage-dependent L-type calcium channel alpha-1C subunit                 | FSRYWR                         | e                        |
| IPI00216139       | Isoform I of Septin-6                                                                      | STLMDTLFNTK                    | c                        |
| IPI00300568       | Isoform IA of Synapsin-1                                                                   | DHIEVVGSSMPLIGDHQDEK           | d                        |
| IPI00300568       | Isoform IA of Synapsin-1                                                                   | EMLSSTIYVYVVK                  | d; e                     |
| IPI00300568       | Isoform IA of Synapsin-1                                                                   | GSHGQTPSPGALPLGR               | d; e                     |
| IPI00300568       | Isoform IA of Synapsin-1                                                                   | IGQNYK                         | d                        |
| IPI00300568       | Isoform IA of Synapsin-1                                                                   | LGTEEFPLIDQTFYPNHK             | d; e                     |
| IPI00300568       | Isoform IA of Synapsin-1                                                                   | LPSPTSAQQPASQAAPPQGGQR         | e; d; e                  |
| IPI00300568       | Isoform IA of Synapsin-1                                                                   | QAGPPQATR                      | e; d; e                  |
| IPI00300568       | Isoform IA of Synapsin-1                                                                   | QASQAGVPR                      | d; e                     |
| IPI00300568       | Isoform IA of Synapsin-1                                                                   | QGPPQKPPGAGPTR                 | e; d; e                  |
| IPI00300568       | Isoform IA of Synapsin-1                                                                   | QTSQAPGAPAQORPPQGGPPQPGPGPQR   | e                        |
| IPI00300568       | Isoform IA of Synapsin-1                                                                   | QTSVSGPAPPK                    | e; d; e                  |
| IPI00300568       | Isoform IA of Synapsin-1                                                                   | QTTAAAAATFSEVGGGGGAGR          | d; e                     |
| IPI00300568       | Isoform IA of Synapsin-1                                                                   | SFASLSD                        | d; e                     |
| IPI00300568       | Isoform IA of Synapsin-1                                                                   | SLKPDFVILR                     | e; d; e                  |
| IPI00300568       | Isoform IA of Synapsin-1                                                                   | SSGVAAPASPAAPSGSSGGGGFNSLSNAVK | e                        |
| IPI00300568       | Isoform IA of Synapsin-1                                                                   | TNTGSAMLEQLAMSDR               | d; e                     |
| IPI00300568       | Isoform IA of Synapsin-1                                                                   | TSVSNWK                        | e                        |
| IPI00300568       | Isoform IA of Synapsin-1                                                                   | TVATAEPPIDAK                   | e; d; e                  |



| IPI Accession No. | Protein Description                                                                 | Peptide Sequence*          | Primary Source Dataset** |
|-------------------|-------------------------------------------------------------------------------------|----------------------------|--------------------------|
| IPI00300568       | Isoform IA of Synapsin-1                                                            | VDNQHDFQDIASVVALTK         | d                        |
| IPI00300568       | Isoform IA of Synapsin-1                                                            | VLLVDEPHDWDWAK             | d; e                     |
| IPI00251507       | Isoform IB of Synapsin-1                                                            | ASGAFPPGGQQR               | c; d; e                  |
| IPI00251507       | Isoform IB of Synapsin-1                                                            | ASPAQAQP                   | c; e                     |
| IPI00023302       | Isoform IIa of Synapsin-2                                                           | EMLLTLPFPVVVK              | d; e                     |
| IPI00023302       | Isoform IIa of Synapsin-2                                                           | FPLIEQTYYPNHIK             | d                        |
| IPI00023302       | Isoform IIa of Synapsin-2                                                           | MNQLLSR                    | d                        |
| IPI00023302       | Isoform IIa of Synapsin-2                                                           | QHAFGMAENEDFR              | e                        |
| IPI00023302       | Isoform IIa of Synapsin-2                                                           | QLTELVIK                   | d                        |
| IPI00023302       | Isoform IIa of Synapsin-2                                                           | QTAASAGLVDAAPAPAAAAR       | d; e                     |
| IPI00023302       | Isoform IIa of Synapsin-2                                                           | SSANDEAK                   | d                        |
| IPI00023302       | Isoform IIa of Synapsin-2                                                           | TSISGNWK                   | d                        |
| IPI00220996       | Isoform IIB of Myc box-dependent-interacting protein 1                              | AQPSDNAPAK                 | c; d; e                  |
| IPI00220996       | Isoform IIB of Myc box-dependent-interacting protein 1                              | GVFFENFTR                  | c; d                     |
| IPI00186299       | Isoform IIB of Synapsin-2                                                           | SFRPFDVILR                 | d                        |
| IPI00186299       | Isoform IIB of Synapsin-2                                                           | TPALSPQRPLTTQQPQSGTLK      | d                        |
| IPI00186299       | Isoform IIB of Synapsin-2                                                           | VLLVDEPHADWAK              | d; e                     |
| IPI00220997       | Isoform IIC1 of Myc box-dependent-interacting protein 1                             | HASNQK                     | d                        |
| IPI00220997       | Isoform IIC1 of Myc box-dependent-interacting protein 1                             | NQAEELIK                   | d                        |
| IPI00289159       | Isoform KGA of Glutaminase kidney isoform, mitochondrial precursor                  | CVQSNVLLTQAFR              | d; e                     |
| IPI00289159       | Isoform KGA of Glutaminase kidney isoform, mitochondrial precursor                  | DGPGETDFAGNSEGK            | e                        |
| IPI00289159       | Isoform KGA of Glutaminase kidney isoform, mitochondrial precursor                  | FDVVMQFLNK                 | d; e                     |
| IPI00289159       | Isoform KGA of Glutaminase kidney isoform, mitochondrial precursor                  | FLLEACK                    | d; e                     |
| IPI00289159       | Isoform KGA of Glutaminase kidney isoform, mitochondrial precursor                  | FSPDLWGVSVCTVDGQR          | d                        |
| IPI00289159       | Isoform KGA of Glutaminase kidney isoform, mitochondrial precursor                  | GSTHPQGVSPPAAPAGPK         | e                        |
| IPI00289159       | Isoform KGA of Glutaminase kidney isoform, mitochondrial precursor                  | MAGNEYVGFSNATFQSER         | e                        |
| IPI00289159       | Isoform KGA of Glutaminase kidney isoform, mitochondrial precursor                  | QGVNNAEK                   | e                        |
| IPI00289159       | Isoform KGA of Glutaminase kidney isoform, mitochondrial precursor                  | YAAVNDLGTVEYVHR            | d; e                     |
| IPI00219183       | Isoform L-APP677 of Amyloid beta A4 protein precursor (Fragment)                    | LVFFAEIDVGSNKK             | d; e                     |
| IPI00478410       | Isoform Liver of ATP synthase gamma chain, mitochondrial precursor                  | ESTTSEQSAR                 | d                        |
| IPI00478410       | Isoform Liver of ATP synthase gamma chain, mitochondrial precursor                  | HLLIGVSSDR                 | d                        |
| IPI00478410       | Isoform Liver of ATP synthase gamma chain, mitochondrial precursor                  | IYGLGSLALYEK               | d; e                     |
| IPI00478410       | Isoform Liver of ATP synthase gamma chain, mitochondrial precursor                  | LTLTFNR                    | c                        |
| IPI0019022        | Isoform Long of ATP-binding cassette sub-family B member 8, mitochondrial precursor | GTTLSSGQK                  | c; d                     |
| IPI00292290       | Isoform Long of Dematin                                                             | ESVGGSPQTK                 | d; e                     |
| IPI00292290       | Isoform Long of Dematin                                                             | HLIEDLHESK                 | d                        |
| IPI00292290       | Isoform Long of Dematin                                                             | SPGHISQASAPR               | e                        |
| IPI00024913       | Isoform Long of ES1 protein homolog, mitochondrial precursor                        | EVVEAHVDQK                 | d                        |
| IPI00296333       | Isoform Long of Long-chain-fatty-acid-CoA ligase 6                                  | LPELDGLGQFFR               | e                        |
| IPI00296333       | Isoform Long of Long-chain-fatty-acid-CoA ligase 6                                  | WLLFEAAK                   | d                        |
| IPI00006482       | Isoform Long of Sodium/potassium-transporting ATPase alpha-1 chain precursor        | AVAGDASESALLK              | d                        |
| IPI00006482       | Isoform Long of Sodium/potassium-transporting ATPase alpha-1 chain precursor        | AVFQANQENLPIK              | d; e                     |
| IPI00006482       | Isoform Long of Sodium/potassium-transporting ATPase alpha-1 chain precursor        | DAFQNAYLELGGI.GER          | d; e                     |
| IPI00006482       | Isoform Long of Sodium/potassium-transporting ATPase alpha-1 chain precursor        | DKYEAASVSEGGDK             | d                        |
| IPI00006482       | Isoform Long of Sodium/potassium-transporting ATPase alpha-1 chain precursor        | EQPLDEELK                  | d                        |
| IPI00006482       | Isoform Long of Sodium/potassium-transporting ATPase alpha-1 chain precursor        | EQPLDEELKDAFQNAYLELGGI.GER | d                        |
| IPI00006482       | Isoform Long of Sodium/potassium-transporting ATPase alpha-1 chain precursor        | GIVVYTGDR                  | d                        |
| IPI00006482       | Isoform Long of Sodium/potassium-transporting ATPase alpha-1 chain precursor        | IPADLR                     | d                        |
| IPI00006482       | Isoform Long of Sodium/potassium-transporting ATPase alpha-1 chain precursor        | IVEIPFNSTNK                | d; e                     |
| IPI00006482       | Isoform Long of Sodium/potassium-transporting ATPase alpha-1 chain precursor        | KADIGVAMGIAGSDVSK          | d                        |
| IPI00006482       | Isoform Long of Sodium/potassium-transporting ATPase alpha-1 chain precursor        | LSLDELHR                   | d                        |
| IPI00006482       | Isoform Long of Sodium/potassium-transporting ATPase alpha-1 chain precursor        | NIAFFSTNCEGTAR             | e                        |
| IPI00006482       | Isoform Long of Sodium/potassium-transporting ATPase alpha-1 chain precursor        | NMVPQALVIR                 | c; d; e                  |
| IPI00006482       | Isoform Long of Sodium/potassium-transporting ATPase alpha-1 chain precursor        | NPNTSEPHLLVMK              | d; e                     |
| IPI00006482       | Isoform Long of Sodium/potassium-transporting ATPase alpha-1 chain precursor        | NSVFGQMK                   | d; e                     |
| IPI00006482       | Isoform Long of Sodium/potassium-transporting ATPase alpha-1 chain precursor        | QAADMILLDDNFASIVTGVVEGR    | c; d; e                  |
| IPI00006482       | Isoform Long of Sodium/potassium-transporting ATPase alpha-1 chain precursor        | SPDFTNENPLETR              | d; e                     |
| IPI00006482       | Isoform Long of Sodium/potassium-transporting ATPase alpha-1 chain precursor        | TSATWLALS                  | e                        |
| IPI00006482       | Isoform Long of Sodium/potassium-transporting ATPase alpha-1 chain precursor        | WINDVEDSYGQWVTEQR          | d; e                     |
| IPI00006482       | Isoform Long of Sodium/potassium-transporting ATPase alpha-1 chain precursor        | YHTEIVFAR                  | c; d; e                  |
| IPI00006482       | Isoform Long of Sodium/potassium-transporting ATPase alpha-1 chain precursor        | YQLSIHK                    | e                        |
| IPI00005614       | Isoform Long of Spectrin beta chain, brain 1                                        | AEIDAR                     | c                        |
| IPI00005614       | Isoform Long of Spectrin beta chain, brain 1                                        | AELFTQSCADLDK              | e                        |
| IPI00005614       | Isoform Long of Spectrin beta chain, brain 1                                        | ALVADSHPESE                | d; e                     |
| IPI00005614       | Isoform Long of Spectrin beta chain, brain 1                                        | AQTLPIISVYTTSESSPGK        | d                        |
| IPI00005614       | Isoform Long of Spectrin beta chain, brain 1                                        | AQTLPIISVYTTSESSPGKR       | e; h                     |
| IPI00005614       | Isoform Long of Spectrin beta chain, brain 1                                        | DALLLWCQMK                 | d                        |
| IPI00005614       | Isoform Long of Spectrin beta chain, brain 1                                        | DASVAEAWLLGQEPYLSR         | d                        |
| IPI00005614       | Isoform Long of Spectrin beta chain, brain 1                                        | DLDDFQSWLSR                | d                        |
| IPI00005614       | Isoform Long of Spectrin beta chain, brain 1                                        | DLMLWMEDVIR                | d; e                     |
| IPI00005614       | Isoform Long of Spectrin beta chain, brain 1                                        | DMGEMVTQGGTDAQYMFLR        | c; d                     |
| IPI00005614       | Isoform Long of Spectrin beta chain, brain 1                                        | DQNTVETLQR                 | d; e                     |
| IPI00005614       | Isoform Long of Spectrin beta chain, brain 1                                        | DTGNIGQER                  | c; d; e                  |
| IPI00005614       | Isoform Long of Spectrin beta chain, brain 1                                        | DVEDEILVWGER               | c; d                     |
| IPI00005614       | Isoform Long of Spectrin beta chain, brain 1                                        | EAEKLESEHPDQAQILSR         | d                        |
| IPI00005614       | Isoform Long of Spectrin beta chain, brain 1                                        | EASLGEASK                  | d                        |
| IPI00005614       | Isoform Long of Spectrin beta chain, brain 1                                        | EAVQK                      | d                        |
| IPI00005614       | Isoform Long of Spectrin beta chain, brain 1                                        | EGEDMIAEEHPGSEK            | c; d                     |
| IPI00005614       | Isoform Long of Spectrin beta chain, brain 1                                        | EGMQLISEKPEAEVVK           | e                        |
| IPI00005614       | Isoform Long of Spectrin beta chain, brain 1                                        | EIEELQSQAQALSQEGK          | d; e                     |
| IPI00005614       | Isoform Long of Spectrin beta chain, brain 1                                        | EIGQSVDEVEK                | e                        |
| IPI00005614       | Isoform Long of Spectrin beta chain, brain 1                                        | EIQGHQPR                   | c; d; e                  |
| IPI00005614       | Isoform Long of Spectrin beta chain, brain 1                                        | ELEAENYHDIK                | c; d                     |
| IPI00005614       | Isoform Long of Spectrin beta chain, brain 1                                        | ENEVLEAWK                  | d; e                     |
| IPI00005614       | Isoform Long of Spectrin beta chain, brain 1                                        | EQWANLEQLSAIR              | d                        |
| IPI00005614       | Isoform Long of Spectrin beta chain, brain 1                                        | ETWLSENQR                  | e                        |
| IPI00005614       | Isoform Long of Spectrin beta chain, brain 1                                        | EVDLLEQWIAER               | d                        |
| IPI00005614       | Isoform Long of Spectrin beta chain, brain 1                                        | FANSLVGGVQQLQAFNTYR        | d; e                     |
| IPI00005614       | Isoform Long of Spectrin beta chain, brain 1                                        | FESLPEMNNQASR              | a; c; d; e               |
| IPI00005614       | Isoform Long of Spectrin beta chain, brain 1                                        | FFSMVR                     | e                        |
| IPI00005614       | Isoform Long of Spectrin beta chain, brain 1                                        | FFWEMAEPEGWIR              | e                        |
| IPI00005614       | Isoform Long of Spectrin beta chain, brain 1                                        | FLQDCQELSLWINEK            | e                        |
| IPI00005614       | Isoform Long of Spectrin beta chain, brain 1                                        | FMELLEPLNER                | d                        |
| IPI00005614       | Isoform Long of Spectrin beta chain, brain 1                                        | FSLFGK                     | d; e                     |
| IPI00005614       | Isoform Long of Spectrin beta chain, brain 1                                        | FYHDAK                     | d                        |
| IPI00005614       | Isoform Long of Spectrin beta chain, brain 1                                        | GNLEVLLFTIQSK              | d                        |
| IPI00005614       | Isoform Long of Spectrin beta chain, brain 1                                        | GVNSAQK                    | c; d                     |



| IPI Accession No. | Protein Description                                                                      | Peptide Sequence*           | Primary Source Dataset** |
|-------------------|------------------------------------------------------------------------------------------|-----------------------------|--------------------------|
| IPI0005614        | Isoform Long of Spectrin beta chain, brain 1                                             | HLGVEDLLQK                  | d                        |
| IPI0005614        | Isoform Long of Spectrin beta chain, brain 1                                             | HQILEQAVEDYAEIVHQLSK        | d                        |
| IPI0005614        | Isoform Long of Spectrin beta chain, brain 1                                             | ILSSDDYGK                   | c; d; e                  |
| IPI0005614        | Isoform Long of Spectrin beta chain, brain 1                                             | ITDLYTDLR                   | e                        |
| IPI0005614        | Isoform Long of Spectrin beta chain, brain 1                                             | KLPEELGR                    | c                        |
| IPI0005614        | Isoform Long of Spectrin beta chain, brain 1                                             | LAEISDVWEEMK                | d                        |
| IPI0005614        | Isoform Long of Spectrin beta chain, brain 1                                             | LEDLEVIQHR                  | c                        |
| IPI0005614        | Isoform Long of Spectrin beta chain, brain 1                                             | LESEHPDQAQILSR              | d                        |
| IPI0005614        | Isoform Long of Spectrin beta chain, brain 1                                             | LPDANK                      | c; d; e                  |
| IPI0005614        | Isoform Long of Spectrin beta chain, brain 1                                             | LILEVHQFSR                  | e                        |
| IPI0005614        | Isoform Long of Spectrin beta chain, brain 1                                             | LLDPEDISVDHPDEK             | c                        |
| IPI0005614        | Isoform Long of Spectrin beta chain, brain 1                                             | LLEVLSEGR                   | d; e                     |
| IPI0005614        | Isoform Long of Spectrin beta chain, brain 1                                             | LQQFLR                      | d                        |
| IPI0005614        | Isoform Long of Spectrin beta chain, brain 1                                             | LTITLELLEVR                 | d; e                     |
| IPI0005614        | Isoform Long of Spectrin beta chain, brain 1                                             | MLTAQDMSYDEAR               | d                        |
| IPI0005614        | Isoform Long of Spectrin beta chain, brain 1                                             | MWEVLESTTQTK                | c; d; e                  |
| IPI0005614        | Isoform Long of Spectrin beta chain, brain 1                                             | NEIDNYEEDYQK                | c; d; e                  |
| IPI0005614        | Isoform Long of Spectrin beta chain, brain 1                                             | QIEAQEKPR                   | d                        |
| IPI0005614        | Isoform Long of Spectrin beta chain, brain 1                                             | QLQEDAAR                    | d; e                     |
| IPI0005614        | Isoform Long of Spectrin beta chain, brain 1                                             | QLWGLLIEETEK                | d                        |
| IPI0005614        | Isoform Long of Spectrin beta chain, brain 1                                             | QNLLSQSHAYQQLR              | d                        |
| IPI0005614        | Isoform Long of Spectrin beta chain, brain 1                                             | RQQEEER                     | e                        |
| IPI0005614        | Isoform Long of Spectrin beta chain, brain 1                                             | SAATWDER                    | d; e                     |
| IPI0005614        | Isoform Long of Spectrin beta chain, brain 1                                             | SQNVITDSSLSAEAIR            | c; d                     |
| IPI0005614        | Isoform Long of Spectrin beta chain, brain 1                                             | TALPAQSAATLPAR              | d; e                     |
| IPI0005614        | Isoform Long of Spectrin beta chain, brain 1                                             | TQETPSAQMEGLNLR             | c; e                     |
| IPI0005614        | Isoform Long of Spectrin beta chain, brain 1                                             | TQILAASYELHK                | c                        |
| IPI0005614        | Isoform Long of Spectrin beta chain, brain 1                                             | TQFAIASEDMPTLTEAEK          | e                        |
| IPI0005614        | Isoform Long of Spectrin beta chain, brain 1                                             | VAVVNIQAR                   | d; e                     |
| IPI0005614        | Isoform Long of Spectrin beta chain, brain 1                                             | VIESTQDLGNLAGVMALQR         | d; e                     |
| IPI0005614        | Isoform Long of Spectrin beta chain, brain 1                                             | VVLVSDYQYK                  | c; d; e                  |
| IPI0005614        | Isoform Long of Spectrin beta chain, brain 1                                             | VQAVVAVAR                   | d                        |
| IPI0005614        | Isoform Long of Spectrin beta chain, brain 1                                             | VSEEAESQQQWDTSK             | d; e                     |
| IPI0005614        | Isoform Long of Spectrin beta chain, brain 1                                             | WEWLR                       | e                        |
| IPI0005614        | Isoform Long of Spectrin beta chain, brain 1                                             | YKEVAELTR                   | e                        |
| IPI00010740       | Isoform Long of Splicing factor, proline- and glutamine-rich                             | FGGGAGPVGQGGPR              | d                        |
| IPI00010740       | Isoform Long of Splicing factor, proline- and glutamine-rich                             | QGGPGGPK                    | d                        |
| IPI00216219       | Isoform Long of Tight junction protein ZO-1                                              | LEEPTPAPSTYSQPADSLR         | e                        |
| IPI00220644       | Isoform M1 of Pyruvate kinase isozymes M1/M2                                             | AEGSDVANALVDGDCIMLSGETAK    | c; d; g                  |
| IPI00220644       | Isoform M1 of Pyruvate kinase isozymes M1/M2                                             | AGKPVICATQMLESMIK           | d                        |
| IPI00220644       | Isoform M1 of Pyruvate kinase isozymes M1/M2                                             | APIHAVTR                    | d; g                     |
| IPI00220644       | Isoform M1 of Pyruvate kinase isozymes M1/M2                                             | ASDVHEVR                    | c; d                     |
| IPI00220644       | Isoform M1 of Pyruvate kinase isozymes M1/M2                                             | ASSHSITDLEAMAMGVS EASYK     | d                        |
| IPI00220644       | Isoform M1 of Pyruvate kinase isozymes M1/M2                                             | DIQDLK                      | c; d                     |
| IPI00220644       | Isoform M1 of Pyruvate kinase isozymes M1/M2                                             | DPYQEAWAEDVDLR              | c; d; e                  |
| IPI00220644       | Isoform M1 of Pyruvate kinase isozymes M1/M2                                             | EAEAAMFHR                   | d                        |
| IPI00220644       | Isoform M1 of Pyruvate kinase isozymes M1/M2                                             | GDLGIEPAEK                  | c; d                     |
| IPI00220644       | Isoform M1 of Pyruvate kinase isozymes M1/M2                                             | GDPYLEAVR                   | c; d                     |
| IPI00220644       | Isoform M1 of Pyruvate kinase isozymes M1/M2                                             | GSGETAEVLK                  | c; d; e                  |
| IPI00220644       | Isoform M1 of Pyruvate kinase isozymes M1/M2                                             | GVNLPGAAYDLPVASEK           | c; d                     |
| IPI00220644       | Isoform M1 of Pyruvate kinase isozymes M1/M2                                             | IENHEGVR                    | c; d                     |
| IPI00220644       | Isoform M1 of Pyruvate kinase isozymes M1/M2                                             | ITLDNAYMEK                  | c; d; e                  |
| IPI00220644       | Isoform M1 of Pyruvate kinase isozymes M1/M2                                             | IYVDDGLISLQVK               | c; d                     |
| IPI00220644       | Isoform M1 of Pyruvate kinase isozymes M1/M2                                             | KASDVHEVR                   | d                        |
| IPI00220644       | Isoform M1 of Pyruvate kinase isozymes M1/M2                                             | RGVNLPGAAYDLPVASEK          | c; d                     |
| IPI00220644       | Isoform M1 of Pyruvate kinase isozymes M1/M2                                             | KLFEELVR                    | c; d                     |
| IPI00220644       | Isoform M1 of Pyruvate kinase isozymes M1/M2                                             | LDIDSPPTAR                  | c; d; e                  |
| IPI00220644       | Isoform M1 of Pyruvate kinase isozymes M1/M2                                             | LFEEELVR                    | c; d; e                  |
| IPI00220644       | Isoform M1 of Pyruvate kinase isozymes M1/M2                                             | LNFSHGTHEYHAETIK            | d                        |
| IPI00220644       | Isoform M1 of Pyruvate kinase isozymes M1/M2                                             | MQHILAR                     | c                        |
| IPI00220644       | Isoform M1 of Pyruvate kinase isozymes M1/M2                                             | NTGHCTIGPASR                | d; e                     |
| IPI00220644       | Isoform M1 of Pyruvate kinase isozymes M1/M2                                             | QAHLYR                      | d                        |
| IPI00220644       | Isoform M1 of Pyruvate kinase isozymes M1/M2                                             | RFDEILEASDGIMVAR            | d                        |
| IPI00220644       | Isoform M1 of Pyruvate kinase isozymes M1/M2                                             | SAHQVAR                     | c                        |
| IPI00220644       | Isoform M1 of Pyruvate kinase isozymes M1/M2                                             | SGMNVAR                     | d                        |
| IPI00220644       | Isoform M1 of Pyruvate kinase isozymes M1/M2                                             | SVETLK                      | d                        |
| IPI00220644       | Isoform M1 of Pyruvate kinase isozymes M1/M2                                             | TATESFASDPILYRPVAALDTK      | d; e                     |
| IPI00220644       | Isoform M1 of Pyruvate kinase isozymes M1/M2                                             | VFLAQK                      | c; d; e                  |
| IPI00220644       | Isoform M1 of Pyruvate kinase isozymes M1/M2                                             | VNFAMNVGK                   | d                        |
| IPI00220644       | Isoform M1 of Pyruvate kinase isozymes M1/M2                                             | VYEVGSK                     | d                        |
| IPI00759723       | Isoform Monomeric of Arginyl-tRNA synthetase                                             | MNDIVK                      | d                        |
| IPI00216393       | Isoform Non-brain of Clathrin light chain A                                              | ELEEYVAR                    | c; d; e                  |
| IPI00216393       | Isoform Non-brain of Clathrin light chain A                                              | LCDFNPK                     | d                        |
| IPI00216393       | Isoform Non-brain of Clathrin light chain A                                              | QDEQLQK                     | c; d; e                  |
| IPI00216472       | Isoform Non-brain of Clathrin light chain B                                              | DLEEWNQR                    | d                        |
| IPI00216472       | Isoform Non-brain of Clathrin light chain B                                              | EETPGTEWEK                  | d                        |
| IPI00216472       | Isoform Non-brain of Clathrin light chain B                                              | VAQLCDFNPK                  | d; e                     |
| IPI00216472       | Isoform Non-brain of Clathrin light chain B                                              | VTEQWR                      | e                        |
| IPI00374740       | Isoform OA3-323 of Leukocyte surface antigen CD47 precursor                              | AVEEPLNAFK                  | d                        |
| IPI00374740       | Isoform OA3-323 of Leukocyte surface antigen CD47 precursor                              | EGETHIELK                   | d; e                     |
| IPI00374740       | Isoform OA3-323 of Leukocyte surface antigen CD47 precursor                              | IEVSQLLK                    | d                        |
| IPI00374740       | Isoform OA3-323 of Leukocyte surface antigen CD47 precursor                              | STVPTDFSSAK                 | d; e                     |
| IPI00029769       | Isoform p59-HCK of Tyrosine-protein kinase HCK                                           | GSLDLFLK                    | d                        |
| IPI0028928        | Isoform PDE1C2 of Calcium/calmodulin-dependent 3',5'-cyclic nucleotide phosphodiesterase | DWLASTFTR                   | e                        |
| IPI00451132       | Isoform PDE2A3 of cGMP-dependent 3',5'-cyclic phosphodiesterase                          | RVQVLQQR                    | c                        |
| IPI00451132       | Isoform PDE2A3 of cGMP-dependent 3',5'-cyclic phosphodiesterase                          | VFDGGVDDSEYER               | e                        |
| IPI00217761       | Isoform RIN1-delta of Ras and Rab interactor 1                                           | EQSETTAEGGGQAGGPAQGEPEAEGRS | d                        |
| IPI00003971       | Isoform RTN1-A of Reticulon-1                                                            | AEAYK                       | d                        |
| IPI00003971       | Isoform RTN1-A of Reticulon-1                                                            | AIDLTYWR                    | c; d; e                  |
| IPI00003971       | Isoform RTN1-A of Reticulon-1                                                            | DTDISIKPEGVR                | d                        |
| IPI00003971       | Isoform RTN1-A of Reticulon-1                                                            | EAGSGPAR                    | d; e                     |
| IPI00003971       | Isoform RTN1-A of Reticulon-1                                                            | GATPAPQAGEPSPGLGAR          | d; e                     |
| IPI00003971       | Isoform RTN1-A of Reticulon-1                                                            | GEGENEAVTPK                 | d                        |
| IPI00003971       | Isoform RTN1-A of Reticulon-1                                                            | HQAQIDQYLGLVLR              | c; d; e                  |
| IPI00003971       | Isoform RTN1-A of Reticulon-1                                                            | TDEGHPK                     | d                        |
| IPI00003971       | Isoform RTN1-A of Reticulon-1                                                            | THNAVVAR                    | d                        |
| IPI00003971       | Isoform RTN1-A of Reticulon-1                                                            | YIDITRPEEVK                 | c; d; e                  |

| IPI Accession No. | Protein Description                                                    | Peptide Sequence*            | Primary Source Dataset** |
|-------------------|------------------------------------------------------------------------|------------------------------|--------------------------|
| IP10003971        | Isoform RTN1-A of Reticulon-1                                          | YTDCLFQVYVNSTLK              | d; e                     |
| IP100219813       | Isoform RTN1-C of Reticulon-1                                          | MDCVWSNWK                    | d                        |
| IP100219813       | Isoform RTN1-C of Reticulon-1                                          | SQAIDLLYWR                   | d; e                     |
| IP100219078       | Isoform SERCA2B of Sarcoplasmic/endoplasmic reticulum calcium ATPase 2 | EFDELNSAQR                   | d; e                     |
| IP100219078       | Isoform SERCA2B of Sarcoplasmic/endoplasmic reticulum calcium ATPase 2 | EWGSGSDTLR                   | e                        |
| IP100219078       | Isoform SERCA2B of Sarcoplasmic/endoplasmic reticulum calcium ATPase 2 | TASEMVLADNFSITVAAVEEGR       | d                        |
| IP100219078       | Isoform SERCA2B of Sarcoplasmic/endoplasmic reticulum calcium ATPase 2 | VDQSILTGESVSIK               | d                        |
| IP100759832       | Isoform Short of 14-3-3 protein beta/alpha                             | AVTEQGHELSNEER               | c; d; e                  |
| IP100759832       | Isoform Short of 14-3-3 protein beta/alpha                             | DNLLTWISENQGDEGDAGEGEN       | e                        |
| IP100759832       | Isoform Short of 14-3-3 protein beta/alpha                             | GDFYR                        | d                        |
| IP100759832       | Isoform Short of 14-3-3 protein beta/alpha                             | QTTVSNSSQAYQEAFEISK          | e                        |
| IP100759832       | Isoform Short of 14-3-3 protein beta/alpha                             | SELVQK                       | c; d                     |
| IP100759832       | Isoform Short of 14-3-3 protein beta/alpha                             | TAFDEAIAELDTLNEESYK          | c; d; e                  |
| IP100759832       | Isoform Short of 14-3-3 protein beta/alpha                             | YLIPNATQPESK                 | d                        |
| IP100218482       | Isoform Short of ES1 protein homolog, mitochondrial precursor          | GQPSEGESR                    | c; d; e                  |
| IP100218482       | Isoform Short of ES1 protein homolog, mitochondrial precursor          | GVEVTVGHEQEKGK               | c; d                     |
| IP100218482       | Isoform Short of ES1 protein homolog, mitochondrial precursor          | ITDLANLSAANHDAIIFPGGFGAAK    | e                        |
| IP100220894       | Isoform Short of Eukaryotic translation initiation factor 4H           | EALTYDGALLGDR                | e                        |
| IP100221038       | Isoform Short of Probable phospholipid-transporting ATPase 1A          | HIYQAASDEGALVYR              | e                        |
| IP100221038       | Isoform Short of Probable phospholipid-transporting ATPase 1A          | YNIITFLPR                    | e                        |
| IP100328230       | Isoform Short of Spectrin beta chain, brain 1                          | EWLDK                        | d                        |
| IP100328230       | Isoform Short of Spectrin beta chain, brain 1                          | LFQLNR                       | c; d; e                  |
| IP100216613       | Isoform Short of Splicing factor, proline- and glutamine-rich          | LFVGNLPADTEDEFKR             | d                        |
| IP100216613       | Isoform Short of Splicing factor, proline- and glutamine-rich          | NLSPYVSNELLEAFSGFPIER        | d                        |
| IP100375145       | Isoform Short of Ubiquitin carboxyl-terminal hydrolase 5               | DLGYIYFYQR                   | e                        |
| IP100375145       | Isoform Short of Ubiquitin carboxyl-terminal hydrolase 5               | EVQDGIAPR                    | e                        |
| IP100375145       | Isoform Short of Ubiquitin carboxyl-terminal hydrolase 5               | IFQNAPTDPTQDFSTQVAK          | e                        |
| IP100375145       | Isoform Short of Ubiquitin carboxyl-terminal hydrolase 5               | IVLPDYLEIAR                  | d; e                     |
| IP100107625       | Isoform SNAP-25a of Synaptosomal-associated protein 25                 | AWGNQDQGVVASQPAR             | c; d; e                  |
| IP100107625       | Isoform SNAP-25a of Synaptosomal-associated protein 25                 | ENEMDENLEQVSGHGNLR           | d                        |
| IP100107625       | Isoform SNAP-25a of Synaptosomal-associated protein 25                 | EQMAISGGFIR                  | d                        |
| IP100107625       | Isoform SNAP-25a of Synaptosomal-associated protein 25                 | IDEANQR                      | c; d                     |
| IP100107625       | Isoform SNAP-25a of Synaptosomal-associated protein 25                 | NELEEMQR                     | d                        |
| IP10010470        | Isoform SNAP-25b of Synaptosomal-associated protein 25                 | MLQLVESK                     | e                        |
| IP100293683       | Isoform Tau-A of Microtubule-associated protein tau                    | IGSLDNITHVPGGGNK             | d                        |
| IP100293683       | Isoform Tau-A of Microtubule-associated protein tau                    | LDFKDR                       | c                        |
| IP100293683       | Isoform Tau-A of Microtubule-associated protein tau                    | LQTAPVMPDLK                  | d                        |
| IP100220173       | Isoform Tau-B of Microtubule-associated protein tau                    | TPPAFK                       | d                        |
| IP100220173       | Isoform Tau-B of Microtubule-associated protein tau                    | VQIVKPVVLSK                  | d                        |
| IP100220174       | Isoform Tau-C of Microtubule-associated protein tau                    | TPSLPTTPTR                   | d                        |
| IP10026836        | Isoform Tau-D of Microtubule-associated protein tau                    | DQGGYTMHQDQEGDTDAGLK         | d                        |
| IP10026836        | Isoform Tau-D of Microtubule-associated protein tau                    | GAAPPQK                      | c; d                     |
| IP10026836        | Isoform Tau-D of Microtubule-associated protein tau                    | IGSTENLK                     | c                        |
| IP10026836        | Isoform Tau-D of Microtubule-associated protein tau                    | SGYSSPSPGTPGSR               | c; d; e; h               |
| IP10026836        | Isoform Tau-D of Microtubule-associated protein tau                    | SPVSGDTSR                    | c; h                     |
| IP10026836        | Isoform Tau-D of Microtubule-associated protein tau                    | TDHGAIEIVYK                  | c; d                     |
| IP10026836        | Isoform Tau-D of Microtubule-associated protein tau                    | TPSSGPEPK                    | c; e                     |
| IP10026836        | Isoform Tau-D of Microtubule-associated protein tau                    | TPSLPTTPREFK                 | c                        |
| IP100220175       | Isoform Tau-E of Microtubule-associated protein tau                    | HPQGGGK                      | d                        |
| IP100220175       | Isoform Tau-E of Microtubule-associated protein tau                    | QEFVEMEDHAGTYGLGDR           | d; e                     |
| IP100220175       | Isoform Tau-E of Microtubule-associated protein tau                    | STPTAEAEAGIGDTPSLEDEAAGHVQAR | c; d                     |
| IP100220175       | Isoform Tau-E of Microtubule-associated protein tau                    | VQIINK                       | d                        |
| IP100009802       | Isoform V0 of Versican core protein precursor                          | LDISEIK                      | d                        |
| IP100215628       | Isoform V1 of Versican core protein precursor                          | ECENQDAR                     | c; d; e                  |
| IP100215628       | Isoform V1 of Versican core protein precursor                          | GSLSGK                       | c                        |
| IP100215628       | Isoform V1 of Versican core protein precursor                          | LATVGLQAAWR                  | c; d; e                  |
| IP100215628       | Isoform V1 of Versican core protein precursor                          | LLASDAGLYR                   | d; e                     |
| IP100215628       | Isoform V1 of Versican core protein precursor                          | NGFDQCDYGLWSDASVR            | d                        |
| IP100215628       | Isoform V1 of Versican core protein precursor                          | VSVPTHPAEVGDASLTVVK          | d                        |
| IP100215630       | Isoform V3 of Versican core protein precursor                          | AQCGGGLLQVR                  | d                        |
| IP100215630       | Isoform V3 of Versican core protein precursor                          | FTFEAAK                      | d                        |
| IP100215630       | Isoform V3 of Versican core protein precursor                          | VGCYGDK                      | d                        |
| IP100215630       | Isoform V3 of Versican core protein precursor                          | YTLNFEAAQK                   | d; e                     |
| IP100219293       | Isoform WA of Plasma membrane calcium-transporting ATPase 2            | AVMWGR                       | d                        |
| IP100219293       | Isoform WA of Plasma membrane calcium-transporting ATPase 2            | GHDSTHTQQR                   | d                        |
| IP100219293       | Isoform WA of Plasma membrane calcium-transporting ATPase 2            | IDESSLTGESDQVR               | d                        |
| IP100219293       | Isoform WA of Plasma membrane calcium-transporting ATPase 2            | IQEQK                        | d                        |
| IP100219293       | Isoform WA of Plasma membrane calcium-transporting ATPase 2            | YGDLLPADGLFIQGNLQK           | e                        |
| IP100219256       | Isoform XA of Plasma membrane calcium-transporting ATPase 3            | SAEGGEMEEREK                 | d; e                     |
| IP100217164       | Isoform XA of Plasma membrane calcium-transporting ATPase 4            | GEVEQEK                      | d                        |
| IP100217164       | Isoform XA of Plasma membrane calcium-transporting ATPase 4            | TECALLGFVTDLK                | d                        |
| IP100219296       | Isoform XB of Plasma membrane calcium-transporting ATPase 2            | EIEPEELNEDVEEIDHAER          | e                        |
| IP100219296       | Isoform XB of Plasma membrane calcium-transporting ATPase 2            | SAEGGDADDR                   | e                        |
| IP100219258       | Isoform ZB of Plasma membrane calcium-transporting ATPase 3            | GHDSTTGEQR                   | e                        |
| IP100017283       | Isoeucyl-tRNA synthetase, mitochondrial precursor                      | FLINLEGGDIR                  | e                        |
| IP100032297       | Isovaleryl-CoA dehydrogenase, mitochondrial precursor                  | TDLAAVPSAR                   | d                        |
| IP100375596       | JAW1-related protein MRV11B short                                      | DHAELMEFK                    | a                        |
| IP100375596       | JAW1-related protein MRV11B short                                      | SCGPSDEGVLR                  | a                        |
| IP100375596       | JAW1-related protein MRV11B short                                      | SGLDVMNPSDVLRLRKL            | a                        |
| IP100375596       | JAW1-related protein MRV11B short                                      | VLAKLPLAEEEK                 | a                        |
| IP100152850       | Junctional adhesion molecule 3 precursor                               | DDSGQYCIASNDAGSAR            | e                        |
| IP100023845       | Kallikrein 6 precursor                                                 | GLVSWGNIKPGSK                | a                        |
| IP100023845       | Kallikrein 6 precursor                                                 | KPNLQVFLGK                   | a                        |
| IP100023845       | Kallikrein 6 precursor                                                 | LSELIQPLPLER                 | a                        |
| IP100023845       | Kallikrein 6 precursor                                                 | YTNWIQK                      | a                        |
| IP100298920       | KARP-1-binding protein 1                                               | FPTDYASTSEDFGNSNR            | a                        |
| IP100298920       | KARP-1-binding protein 1                                               | VKSMTSAHGSASVNSRW            | a                        |
| IP100015568       | Kelch repeat and BTB domain-containing protein 11                      | ACPEEPAAPSPEPR               | e                        |
| IP100015568       | Kelch repeat and BTB domain-containing protein 11                      | EGEAGDAGDGGGFEEALGAPLDVR     | e                        |
| IP100015568       | Kelch repeat and BTB domain-containing protein 11                      | GEAQAGPSGVSYSR               | d; e                     |
| IP100015568       | Kelch repeat and BTB domain-containing protein 11                      | QWEAGSAGASPEELASPEER         | e                        |
| IP100015568       | Kelch repeat and BTB domain-containing protein 11                      | WAPVAPLPR                    | e                        |
| IP100292917       | Kelch-like protein 8                                                   | WELVGSVSHCR                  | a                        |
| IP100220327       | Keratin 1                                                              | EREQIKSLNNQFASFDK            | a                        |
| IP100220327       | Keratin 1                                                              | QISNLQSSISDAEQR              | a                        |
| IP100295684       | Keratin 10                                                             | ALEESNYLEEGK                 | a; c                     |
| IP100383111       | Keratin 10                                                             | ERYDQHGNRSRQGEPR             | a                        |

| IPI Accession No. | Protein Description                       | Peptide Sequence*           | Primary Source Dataset** |
|-------------------|-------------------------------------------|-----------------------------|--------------------------|
| IP100295684       | Keratin 10                                | SGGGGGGGCGGGGG              | a                        |
| IP100295684       | keratin 10                                | SQYEQLAEQNR                 | a; c                     |
| IP100217963       | Keratin 16                                | VLQGLELEIQSLSMK             | a                        |
| IP100607751       | keratin 2a                                | AQYEIEAQR                   | a; c                     |
| IP100241841       | Keratin 6L                                | MDLHGK                      | a                        |
| IP100306959       | Keratin 7                                 | WTLLEQKSAKSSR               | a                        |
| IP100019359       | Keratin 9                                 | GPAAIQR                     | a                        |
| IP100015309       | Keratin, type I cytoskeletal 12           | DAEAWFIEK                   | a                        |
| IP100015309       | Keratin, type I cytoskeletal 12           | KNHEDELQSFRR                | a                        |
| IP100290077       | Keratin, type I cytoskeletal 15           | TTTTLQSSSTFGGGSTR           | a                        |
| IP100290077       | Keratin, type I cytoskeletal 15           | VLDELTLAR                   | a                        |
| IP100019359       | Keratin, type I cytoskeletal 9            | GGGGSYGGGGGGGGGGSR          | c; d                     |
| IP100019359       | Keratin, type I cytoskeletal 9            | QEYEQLIAK                   | d                        |
| IP100182655       | Keratin, type II cuticular Hb6            | YEEVSLR                     | d; e                     |
| IP100220327       | Keratin, type II cytoskeletal 1           | DYQELMNTK                   | c                        |
| IP100220327       | Keratin, type II cytoskeletal 1           | GGGGGGYGGSSYSGGGYSGGGGGGGGR | c; d                     |
| IP100220327       | Keratin, type II cytoskeletal 1           | GSGGGSSGSGGGR               | d                        |
| IP100220327       | Keratin, type II cytoskeletal 1           | HEISELNR                    | a; c                     |
| IP100220327       | Keratin, type II cytoskeletal 1           | SLDLDSHAEVK                 | c; d                     |
| IP100220327       | Keratin, type II cytoskeletal 1           | SLNNOFASEIDK                | c                        |
| IP100220327       | Keratin, type II cytoskeletal 1           | TLLEGEFSR                   | d                        |
| IP100220327       | Keratin, type II cytoskeletal 1           | TNAENEFVTK                  | c; d                     |
| IP100220327       | Keratin, type II cytoskeletal 1           | WELLQQVDITSTR               | d                        |
| IP100220327       | Keratin, type II cytoskeletal 1           | YEELQITAGR                  | c; d; f; g               |
| IP100021304       | Keratin, type II cytoskeletal 2 epidermal | FLEQQNQLQTK                 | a; c                     |
| IP100021304       | Keratin, type II cytoskeletal 2 epidermal | GFSSGSAVSSGSR               | a                        |
| IP100290857       | Keratin, type II cytoskeletal 3           | DDLARLLR                    | a                        |
| IP100290857       | Keratin, type II cytoskeletal 3           | KYEDEINK                    | a                        |
| IP100290857       | Keratin, type II cytoskeletal 3           | SAVVSQSSR                   | a                        |
| IP100290857       | Keratin, type II cytoskeletal 3           | SEHELNR                     | a                        |
| IP100290078       | Keratin, type II cytoskeletal 4           | CSSGGFQSR                   | a                        |
| IP100290078       | Keratin, type II cytoskeletal 4           | SLYLRGNK                    | a                        |
| IP100009867       | Keratin, type II cytoskeletal 5           | SRQSSVFRSQQSR               | a                        |
| IP100009867       | Keratin, type II cytoskeletal 5           | VSLAGACGVGGYGR              | a                        |
| IP100009867       | Keratin, type II cytoskeletal 5           | YEELQITAGR                  | a                        |
| IP100296350       | Keratin, type II cytoskeletal 6F          | DAKNLEGLLEDALQK             | a                        |
| IP100296350       | Keratin, type II cytoskeletal 6F          | NLDDSHAEVK                  | a                        |
| IP100296350       | Keratin, type II cytoskeletal 6F          | QNLEPLFEQYINLNR             | a                        |
| IP100006143       | KIAA0013 protein                          | AVEVAGGRGR                  | a                        |
| IP100006143       | KIAA0013 protein                          | EQRSMSCSEENIGAIK            | a                        |
| IP100006143       | KIAA0013 protein                          | NGREYVCGSGVNR               | a                        |
| IP100006143       | KIAA0013 protein                          | RRHETAATEIGGK               | a                        |
| IP100291929       | KIAA0170 protein                          | ASRRRAAEK                   | a                        |
| IP100291929       | KIAA0170 protein                          | ETAERVGPGRPLER              | a                        |
| IP100291929       | KIAA0170 protein                          | FLCALGR                     | a                        |
| IP100291929       | KIAA0170 protein                          | GAGNGVVPAGVILER             | a                        |
| IP100291929       | KIAA0170 protein                          | RHQKGLLNCK                  | a                        |
| IP100291929       | KIAA0170 protein                          | VPKVLERDTQR                 | a                        |
| IP100001159       | KIAA0219 protein                          | ADYTSRSLRVSGLIR             | a                        |
| IP100001159       | KIAA0219 protein                          | AGSVLLGAMAYCAPK             | a                        |
| IP100001159       | KIAA0219 protein                          | ASPNTPPGRVDENGPGL           | a                        |
| IP100001159       | KIAA0219 protein                          | AVMLLHTHTTSRVGK             | a                        |
| IP100001159       | KIAA0219 protein                          | AVMSNLSAHGVK                | a                        |
| IP100001159       | KIAA0219 protein                          | DLPEGAVK                    | a                        |
| IP100001159       | KIAA0219 protein                          | DLPEGAVKGLCK                | a                        |
| IP100001159       | KIAA0219 protein                          | EMLQAQLDREAQVRR             | a                        |
| IP100001159       | KIAA0219 protein                          | FTPYVGPPIPCILK              | a                        |
| IP100001159       | KIAA0219 protein                          | HAVDGAVK                    | a                        |
| IP100001159       | KIAA0219 protein                          | QAQQTIVR                    | a                        |
| IP100001159       | KIAA0219 protein                          | SALLDFYMK                   | a                        |
| IP100001159       | KIAA0219 protein                          | VLQEALCVISGVPLK             | a                        |
| IP100022471       | KIAA0223 protein                          | ALRTK                       | a                        |
| IP100022471       | KIAA0223 protein                          | LYDPGQQYASHVR               | a                        |
| IP100022471       | KIAA0223 protein                          | NRAGSPSPQSGELPR             | a                        |
| IP100022471       | KIAA0223 protein                          | TQKQLEDTK                   | a                        |
| IP100293921       | KIAA0259 protein                          | EAQSEK                      | a                        |
| IP100293921       | KIAA0259 protein                          | ENAGKIMSLSR                 | a                        |
| IP100293921       | KIAA0259 protein                          | IMSLSR                      | a                        |
| IP100293921       | KIAA0259 protein                          | IYLCGFSGR                   | a                        |
| IP100180625       | KIAA0284 protein                          | DESDDGVAQR                  | a                        |
| IP100180625       | KIAA0284 protein                          | GGEPEGSLPVRMRR              | a                        |
| IP100180625       | KIAA0284 protein                          | TPARPFSGVGRSR               | a                        |
| IP100019642       | KIAA0291; similar rodent cytoplasmic      | TGNSGSGNLSDSGSVK            | a                        |
| IP100019642       | KIAA0291; similar rodent cytoplasmic      | VLLLEAMR                    | a                        |
| IP100004419       | KIAA0296 gene product                     | SHMRTHAPEGR                 | a                        |
| IP100329826       | KIAA0300 protein                          | SRLSGGVHRR                  | a                        |
| IP100006524       | KIAA0319 protein                          | EKADFLFK                    | a                        |
| IP100006524       | KIAA0319 protein                          | ELEKDLIQPSGK                | a                        |
| IP100006524       | KIAA0319 protein                          | GSPSGIWDSPEDIR              | a                        |
| IP100006524       | KIAA0319 protein                          | GSPSGIWDSPEDIRK             | a                        |
| IP100173347       | KIAA0322 protein                          | DLVNFNMFADTR                | a                        |
| IP100173347       | KIAA0322 protein                          | GGPHDGVITPR                 | a                        |
| IP100173347       | KIAA0322 protein                          | TEGNHGLEK                   | a                        |
| IP100000764       | KIAA0356 protein                          | AQPLINLQMVNASLYEHV          | a                        |
| IP100465296       | KIAA0370 protein                          | ITDASALR                    | a                        |
| IP100178072       | KIAA0376 protein                          | HDMEREIK                    | a                        |
| IP100178072       | KIAA0376 protein                          | SRKQEEER                    | a                        |
| IP100178072       | KIAA0376 protein                          | TLHRR                       | a                        |
| IP100304926       | KIAA0404 protein                          | ACPCSHVRLTGTAVQLS           | a                        |
| IP100304926       | KIAA0404 protein                          | RGQPADLR                    | a                        |
| IP100304926       | KIAA0404 protein                          | RRASGGGPGPAVSEM             | a                        |
| IP100002221       | KIAA0467 protein                          | APLPSDDYAIDESCAPR           | a                        |
| IP100002221       | KIAA0467 protein                          | ELFPRLTADMRR                | a                        |
| IP100002221       | KIAA0467 protein                          | LVQWQNAK                    | a                        |
| IP100002221       | KIAA0467 protein                          | NMFVYQERATK                 | a                        |
| IP100002221       | KIAA0467 protein                          | RHRPESGSGSR                 | a                        |
| IP100002221       | KIAA0467 protein                          | SPLDMVSSK                   | a                        |

| IPI Accession No. | Protein Description   | Peptide Sequence*  | Primary Source Dataset** |
|-------------------|-----------------------|--------------------|--------------------------|
| IPI0002221        | KIAA0467 protein      | SSAHMVS            | a                        |
| IPI00477477       | KIAA0470 protein      | LGSLSR             | a                        |
| IPI00477477       | KIAA0470 protein      | MNRAVNGETLK        | a                        |
| IPI00477477       | KIAA0470 protein      | QDADRPLSKMNR       | a                        |
| IPI00477477       | KIAA0470 protein      | RHHSEHK            | a                        |
| IPI00477477       | KIAA0470 protein      | TPEGNNGR           | a                        |
| IPI00480141       | KIAA0521 protein      | DSAPTESR           | a                        |
| IPI00480141       | KIAA0521 protein      | SSSKLK             | a                        |
| IPI00028540       | KIAA0522 protein      | GALSSSLR           | a                        |
| IPI00028540       | KIAA0522 protein      | GMMRPNASQPGAKDS    | a                        |
| IPI00028540       | KIAA0522 protein      | TIQTAFRQYR         | a                        |
| IPI00305349       | KIAA0523 protein      | GSVCGAVDR          | a                        |
| IPI00305349       | KIAA0523 protein      | KCAGHLGYAADR       | a                        |
| IPI00175146       | KIAA0546 protein      | FSPYYR             | a                        |
| IPI00175146       | KIAA0546 protein      | KWQOKEQVMK         | a                        |
| IPI00175146       | KIAA0546 protein      | YEAAMELCK          | a                        |
| IPI00030790       | KIAA0556 protein      | AHSDFSR            | a                        |
| IPI00030790       | KIAA0556 protein      | RGEQPGLSR          | a                        |
| IPI00030790       | KIAA0556 protein      | LYVNR              | a                        |
| IPI00030790       | KIAA0556 protein      | SASHTFGTHDYGRR     | a                        |
| IPI00297593       | KIAA0570 protein      | FVAAGGLQQLLEFNSGIL | a                        |
| IPI00297593       | KIAA0570 protein      | NMADLMWSTVK        | a                        |
| IPI00413264       | KIAA0584 protein      | EYVESDLK           | a                        |
| IPI00413264       | KIAA0584 protein      | RMQVKEPEK          | a                        |
| IPI00433656       | KIAA0586 protein      | DDELSKR            | a                        |
| IPI00433656       | KIAA0586 protein      | TSSFQPVMPSSR       | a                        |
| IPI00006035       | KIAA0590 protein      | GRVAMWR            | a                        |
| IPI00006035       | KIAA0590 protein      | QVAIFELSGAAIR      | a                        |
| IPI00169434       | KIAA0642 protein      | ACDESFQPLGDHMKMWG  | a                        |
| IPI00169434       | KIAA0642 protein      | DNKIPSDLLDK        | a                        |
| IPI00169434       | KIAA0642 protein      | ELMRQR             | a                        |
| IPI00169434       | KIAA0642 protein      | EQEIALRR           | a                        |
| IPI00169434       | KIAA0642 protein      | QRQQQALR           | a                        |
| IPI00066556       | KIAA0644 protein      | FMDSAGGGAGSLR      | a                        |
| IPI00066556       | KIAA0644 protein      | KRPFSDSGQAKGNAEET  | a                        |
| IPI00066556       | KIAA0644 protein      | RWMGDWHSQGR        | a                        |
| IPI00066556       | KIAA0644 protein      | TKDGGGAGR          | a                        |
| IPI00480027       | KIAA0649 gene product | KFLAEK             | a                        |
| IPI00480027       | KIAA0649 gene product | TPPWSFAHQSR        | a                        |
| IPI00000706       | KIAA0659 protein      | LRATK              | a                        |
| IPI00000706       | KIAA0659 protein      | SPSQEILLR          | a                        |
| IPI00000706       | KIAA0659 protein      | SSGFRSIR           | a                        |
| IPI00162563       | KIAA0661 protein      | EEGGPGVSTPDNR      | a                        |
| IPI00162563       | KIAA0661 protein      | LQAEIQGAVRTNER     | a                        |
| IPI00162563       | KIAA0661 protein      | QACEDELRR          | a                        |
| IPI00162563       | KIAA0661 protein      | VEELCQRVYSR        | a                        |
| IPI00294794       | KIAA0690 protein      | DHSFKVSADGR        | a                        |
| IPI00294794       | KIAA0690 protein      | FCIQIEK            | a                        |
| IPI00294794       | KIAA0690 protein      | LPGSVSAK           | a                        |
| IPI00414746       | KIAA0720 protein      | FIHHVNAQCMRQR      | a                        |
| IPI00414746       | KIAA0720 protein      | GIALGK             | a                        |
| IPI00414746       | KIAA0720 protein      | KAERTR             | a                        |
| IPI00414746       | KIAA0720 protein      | MEQLEK             | a                        |
| IPI00006499       | KIAA0753 protein      | ELNELKAEMYSR       | a                        |
| IPI00006499       | KIAA0753 protein      | MEEMEK             | a                        |
| IPI00006499       | KIAA0753 protein      | TKAGK              | a                        |
| IPI00006669       | KIAA0763 protein      | HRIESELEK          | a                        |
| IPI00006669       | KIAA0763 protein      | LTSSVPGADIK        | a                        |
| IPI00166031       | KIAA0833 protein      | MMSRACWAK          | a                        |
| IPI00166031       | KIAA0833 protein      | MSILERLEQMERR      | a                        |
| IPI00166031       | KIAA0833 protein      | QDQAAR             | a                        |
| IPI00166031       | KIAA0833 protein      | SERIEK             | a                        |
| IPI00166031       | KIAA0833 protein      | VDVGGQLR           | a                        |
| IPI00166031       | KIAA0833 protein      | VLHLEK             | a                        |
| IPI00007274       | KIAA0844 protein      | ARLDQFIENLLQRVELAE | a                        |
| IPI00007274       | KIAA0844 protein      | FNRMVEAVDR         | a                        |
| IPI00007274       | KIAA0844 protein      | MVEAVDR            | a                        |
| IPI00295457       | KIAA0864 protein      | ENAEKAK            | a                        |
| IPI00295457       | KIAA0864 protein      | VLSQLDASVR         | a                        |
| IPI00006283       | KIAA0881 protein      | EIEAFDAESMR        | a                        |
| IPI00169407       | KIAA0882 protein      | DDGEAMTVLGR        | a                        |
| IPI00169407       | KIAA0882 protein      | EFVSGLSAACHGDLTEKL | a                        |
| IPI00169407       | KIAA0882 protein      | INDVK              | a                        |
| IPI00169407       | KIAA0882 protein      | LEDSSPR            | a                        |
| IPI00016653       | KIAA0912 protein      | QFLDDHRNK          | a                        |
| IPI00016653       | KIAA0912 protein      | TTQSGMSK           | a                        |
| IPI00016653       | KIAA0912 protein      | WEEQHEVSNK         | a                        |
| IPI00016653       | KIAA0912 protein      | YEEQVLSQK          | a                        |
| IPI00180384       | KIAA0944 protein      | DSCVNIQK           | a                        |
| IPI00180384       | KIAA0944 protein      | FTAVDKTWR          | a                        |
| IPI00180384       | KIAA0944 protein      | GLNEYLEK           | a                        |
| IPI00180384       | KIAA0944 protein      | IAMDGLR            | a                        |
| IPI00180384       | KIAA0944 protein      | IAMDGLRK           | a                        |
| IPI00180384       | KIAA0944 protein      | IQDGLNPYLR         | a                        |
| IPI00180384       | KIAA0944 protein      | LVDIQIMCAMGPPGGGR  | a                        |
| IPI00180384       | KIAA0944 protein      | NPVTFR             | a                        |
| IPI00180384       | KIAA0944 protein      | RPSYVAPLYK         | a                        |
| IPI00180384       | KIAA0944 protein      | SLMNLIDCFMDDFADEVK | a                        |
| IPI00384600       | KIAA0953 protein      | FPDLCVY            | c                        |
| IPI00237011       | KIAA0965 protein      | ETEFLR             | a                        |
| IPI00237011       | KIAA0965 protein      | RAPGRLR            | a                        |
| IPI00240812       | KIAA0979 protein      | EAMMGLAQIYK        | a                        |
| IPI00240812       | KIAA0979 protein      | EEMVSR             | a                        |
| IPI00240812       | KIAA0979 protein      | RLDAAAADPGEFRSER   | a                        |
| IPI00329141       | KIAA0990 protein      | EALDDIVMQVEMINANA  | a                        |
| IPI00329141       | KIAA0990 protein      | ISELRHRTIQLHR      | a                        |
| IPI00329141       | KIAA0990 protein      | MTVPVRR            | a                        |

| IPI Accession No. | Protein Description        | Peptide Sequence*  | Primary Source Dataset** |
|-------------------|----------------------------|--------------------|--------------------------|
| IP100329141       | KIAA0990 protein           | SGQAAASQAGGAR      | a                        |
| IP100032263       | KIAA0999 protein           | RLSMEQICK          | a                        |
| IP100032263       | KIAA0999 protein           | TQLDEENLKK         | a                        |
| IP100180408       | KIAA1000 protein           | EGFPR              | a                        |
| IP100166010       | KIAA1007 protein isoform a | IAAHIMMRNLTAGMAMIT | a                        |
| IP100166010       | KIAA1007 protein isoform a | LPDLLR             | a                        |
| IP100166010       | KIAA1007 protein isoform a | MLAHTPQQK          | a                        |
| IP100166010       | KIAA1007 protein isoform a | NSRDAIALGLLQK      | a                        |
| IP100166010       | KIAA1007 protein isoform a | YNVEAVELLIR        | a                        |
| IP100007122       | KIAA1009 protein           | EANEIEEK           | a                        |
| IP100007122       | KIAA1009 protein           | EEMSAKR            | a                        |
| IP100007122       | KIAA1009 protein           | SISTSNQPR          | a                        |
| IP100298956       | KIAA1061 protein           | FDDYNSDSSLTLR      | a                        |
| IP100456475       | KIAA1069 protein           | DSVSEATR           | a                        |
| IP100456475       | KIAA1069 protein           | SAEDK              | a                        |
| IP100007193       | KIAA1074 protein           | DLSHKNSMLQEEIAMLK  | a                        |
| IP100007193       | KIAA1074 protein           | KCFEDLK            | a                        |
| IP100007193       | KIAA1074 protein           | MQQELEK            | a                        |
| IP100007193       | KIAA1074 protein           | SGETHQGFPR         | a                        |
| IP100007193       | KIAA1074 protein           | YKQLYLEELK         | a                        |
| IP100465295       | KIAA1075 protein           | QELDRLLGGCGVASGGR  | a                        |
| IP100465295       | KIAA1075 protein           | RSQADTPSR          | a                        |
| IP100298935       | KIAA1082 protein           | ETVNALISDQK        | a                        |
| IP100298935       | KIAA1082 protein           | FATYTK             | a                        |
| IP100298935       | KIAA1082 protein           | KPLFTTSSSK         | a                        |
| IP100298935       | KIAA1082 protein           | SQASGENSR          | a                        |
| IP100298935       | KIAA1082 protein           | DTGK               | a                        |
| IP100386893       | KIAA1096 protein           | GSVGGGR            | a                        |
| IP100386893       | KIAA1096 protein           | MSEMELK            | a                        |
| IP100386893       | KIAA1096 protein           | SENSDFEVPK         | a                        |
| IP100386893       | KIAA1096 protein           | SETRWGPSPSSNRR     | a                        |
| IP100386893       | KIAA1096 protein           | SGRNFSGPR          | a                        |
| IP100401798       | KIAA1102 protein           | CEEEAAVQPHSR       | a                        |
| IP100401798       | KIAA1102 protein           | FWAWDPEERR         | a                        |
| IP100401798       | KIAA1102 protein           | QTPSPDVVLRSSDGR    | a                        |
| IP100401798       | KIAA1102 protein           | TPVSDDAESTSMFDMR   | a                        |
| IP100413794       | KIAA1117 protein           | TRVRSVQRVQAEK      | a                        |
| IP100413794       | KIAA1117 protein           | VLQNNAKYQVVPK      | a                        |
| IP100005689       | KIAA1124 protein           | DAHQQR             | a                        |
| IP100005689       | KIAA1124 protein           | FRADTGLK           | a                        |
| IP100005689       | KIAA1124 protein           | YGSQPRGTMASAKVR    | a                        |
| IP100005689       | KIAA1124 protein           | YSRQLRDK           | a                        |
| IP100644388       | KIAA1183 protein           | QVLSVMSK           | c                        |
| IP100167009       | KIAA1187 protein           | AVVQSPQVTEVL       | a                        |
| IP100167009       | KIAA1187 protein           | EEAEARSR           | a                        |
| IP100167009       | KIAA1187 protein           | RSQSLPASPR         | a                        |
| IP100401831       | KIAA1200 protein           | IFYYYR             | a                        |
| IP100401831       | KIAA1200 protein           | MGSQVK             | a                        |
| IP100401831       | KIAA1200 protein           | TYVLTADSPSLEEWR    | a                        |
| IP100401831       | KIAA1200 protein           | VQATGPPALLR        | a                        |
| IP100297288       | KIAA1204 protein           | RPNPEK             | a                        |
| IP100297288       | KIAA1204 protein           | YSAVISTNSTPCR      | a                        |
| IP100456690       | KIAA1212 protein           | LEMENQSLTKTVEELR   | a                        |
| IP100456690       | KIAA1212 protein           | QELEEK             | a                        |
| IP100179164       | KIAA1244 protein           | IMKEILGSPQR        | a                        |
| IP100179164       | KIAA1244 protein           | SALHLFRLGNAMLR     | a                        |
| IP100179164       | KIAA1244 protein           | SHLDLLKLMDGMTEACI  | a                        |
| IP100179164       | KIAA1244 protein           | SINTAVR            | a                        |
| IP100179164       | KIAA1244 protein           | TAALSLEK           | a                        |
| IP100179164       | KIAA1244 protein           | YISMQLNAVIFDLLDSYR | a                        |
| IP100179164       | KIAA1244 protein           | YVLVLTAGVFTPEEMWR  | a                        |
| IP100033429       | KIAA1250 protein           | CEVELMARMAR        | a                        |
| IP100033429       | KIAA1250 protein           | DTYRR              | a                        |
| IP100033429       | KIAA1250 protein           | EGESWNWAWVLSTRLA   | a                        |
| IP100033429       | KIAA1250 protein           | GDTPLHAIKGRSR      | a                        |
| IP100033429       | KIAA1250 protein           | GGHVEIVR           | a                        |
| IP100033429       | KIAA1250 protein           | LKSEGFMK           | a                        |
| IP100033429       | KIAA1250 protein           | NIPITK             | a                        |
| IP100033429       | KIAA1250 protein           | TWQVQLDLSLNSQR     | a                        |
| IP100297208       | KIAA1276 protein           | EVETLRQEHR         | a                        |
| IP100297208       | KIAA1276 protein           | LDETSR             | a                        |
| IP100297208       | KIAA1276 protein           | RFLEETQQAQRAR      | a                        |
| IP100297208       | KIAA1276 protein           | VVSVPNLASYAKNFLSGD | a                        |
| IP100395925       | KIAA1280 protein           | LDNESWPSTAEADR     | a                        |
| IP100395925       | KIAA1280 protein           | LYRSDSDSSTLPR      | a                        |
| IP100395925       | KIAA1280 protein           | QLNEELCALRELK      | a                        |
| IP100395925       | KIAA1280 protein           | WHVSVQVTSSEPSR     | a                        |
| IP100413206       | KIAA1291 protein           | DIOQTITQNMER       | a                        |
| IP100413206       | KIAA1291 protein           | SSTQMTWALFR        | a                        |
| IP100023832       | KIAA1295 protein           | WNGMSRLEK          | a                        |
| IP100023832       | KIAA1295 protein           | GSLGPGWGTGKIGENK   | a                        |
| IP100023832       | KIAA1295 protein           | HIPPAR             | a                        |
| IP100023832       | KIAA1295 protein           | SEGELLERERER       | a                        |
| IP100163851       | KIAA1338 protein           | DTIDQGLYRDTVIR     | a                        |
| IP100163851       | KIAA1338 protein           | DTVRLWRLFR         | a                        |
| IP100163851       | KIAA1338 protein           | GDQLDLMPTINSLIK    | a                        |
| IP100001192       | KIAA1370 protein           | RSDQLK             | a                        |
| IP100001192       | KIAA1370 protein           | MFVVYDLR           | a                        |
| IP100001192       | KIAA1370 protein           | RISGEPVER          | a                        |
| IP100002208       | KIAA1373 protein           | LIEAERKR           | a                        |
| IP100002208       | KIAA1373 protein           | RIAQMR             | a                        |
| IP100012622       | KIAA1391 protein           | CSEPNIEDQNRK       | a                        |
| IP100012622       | KIAA1391 protein           | QSANYKSCR          | a                        |
| IP100012622       | KIAA1391 protein           | QSLVTGTDVSK        | a                        |
| IP100012622       | KIAA1391 protein           | VLPRLNLCPK         | a                        |
| IP100395649       | KIAA1409 protein           | MRFEAVEK           | a                        |
| IP100395649       | KIAA1409 protein           | MVKYQPVEMVQRSEIE   | a                        |

| IPI Accession No. | Protein Description        | Peptide Sequence*  | Primary Source Dataset** |
|-------------------|----------------------------|--------------------|--------------------------|
| IPI00002127       | KIAA1410 protein           | ALLPTDDFLGHEDPKSQK | a                        |
| IPI00002127       | KIAA1410 protein           | MQVFPQVLPGQHPR     | a                        |
| IPI00002127       | KIAA1410 protein           | RKFGPLGPNIPYEFTDGD | a                        |
| IPI00002127       | KIAA1410 protein           | SHYTFNLRDLK        | a                        |
| IPI00002127       | KIAA1410 protein           | SSVKEVIASINCNLTMSL | a                        |
| IPI00002127       | KIAA1410 protein           | WIKNMEK            | a                        |
| IPI00479069       | KIAA1414 protein           | AWAEVYVYVAMNIK     | a                        |
| IPI00479069       | KIAA1414 protein           | AWAEVYVYVAMNIKK    | a                        |
| IPI00479069       | KIAA1414 protein           | GGSGFLKSGGEMLK     | a                        |
| IPI00479069       | KIAA1414 protein           | SMAVRCVAVK         | a                        |
| IPI00165979       | KIAA1417 protein           | FENEK              | a                        |
| IPI00165979       | KIAA1417 protein           | LGHGDEQTCLYPR      | a                        |
| IPI00165979       | KIAA1417 protein           | QVVLC              | a                        |
| IPI00165979       | KIAA1417 protein           | TIMEEESRQK         | a                        |
| IPI00165979       | KIAA1417 protein           | TVRMSSPMPDCTSKCR   | a                        |
| IPI00007929       | KIAA1418 protein           | RFSRPAAGR          | a                        |
| IPI00007929       | KIAA1418 protein           | VFAQPNLAEMIQK      | a                        |
| IPI00020601       | KIAA1458 protein           | QEVPMYTGPSRQEVLI   | a                        |
| IPI00020601       | KIAA1458 protein           | TGSGYSR            | a                        |
| IPI00020601       | KIAA1458 protein           | YLQSEK             | a                        |
| IPI00465045       | KIAA1463 protein           | DLHWAMMAHR         | a                        |
| IPI00465045       | KIAA1463 protein           | RPKRPPLK           | a                        |
| IPI00292777       | KIAA1503 protein           | CMDLSGISK          | a                        |
| IPI00292781       | KIAA1503 protein           | ELVQRLETSMIHWTR    | a                        |
| IPI00292777       | KIAA1503 protein           | NLHILR             | a                        |
| IPI00292836       | KIAA1529 protein           | QEELDSHIRMKNK      | a                        |
| IPI00292836       | KIAA1529 protein           | VQSSSELELR         | a                        |
| IPI00183229       | KIAA1545 protein           | FLVQSAERPGASLPGGA  | a                        |
| IPI00328089       | KIAA1555 protein           | SPSQESVSLSGSSR     | a                        |
| IPI00328089       | KIAA1555 protein           | SQFSGPSGDAAR       | a                        |
| IPI00328089       | KIAA1555 protein           | SSHVFTSHPRMLKR     | a                        |
| IPI00328089       | KIAA1555 protein           | SSSVGCLAEASAR      | a                        |
| IPI00030572       | KIAA1582 protein           | SPLLGPGR           | a                        |
| IPI00030572       | KIAA1582 protein           | VDVVK              | a                        |
| IPI00177381       | KIAA1604 protein           | DNPRNTR            | a                        |
| IPI00177381       | KIAA1604 protein           | FFGLLAGR           | a                        |
| IPI00177381       | KIAA1604 protein           | FPQIGELIKR         | a                        |
| IPI00177381       | KIAA1604 protein           | SYDSSMESRNR        | a                        |
| IPI00242962       | KIAA1618 protein           | IMCTVDHQQRDQWIK    | a                        |
| IPI00242962       | KIAA1618 protein           | LLDTYR             | a                        |
| IPI00242962       | KIAA1618 protein           | LLSLVDSAGQR        | a                        |
| IPI00242962       | KIAA1618 protein           | NEKEQKQEAADVQEVK   | a                        |
| IPI00014515       | KIAA1622 protein           | EELLLEMEQLEK       | a                        |
| IPI00014515       | KIAA1622 protein           | GRSGPGGESAR        | a                        |
| IPI00014515       | KIAA1622 protein           | HLLQLEMCVR         | a                        |
| IPI00014515       | KIAA1622 protein           | MEMSMDAFQK         | a                        |
| IPI00014515       | KIAA1622 protein           | SGPGGESARR         | a                        |
| IPI00014515       | KIAA1622 protein           | TPEEIER            | a                        |
| IPI00014515       | KIAA1622 protein           | YGNLEK             | a                        |
| IPI00288939       | KIAA1640 protein           | FQAALK             | a                        |
| IPI00288939       | KIAA1640 protein           | LNMLMKNKR          | a                        |
| IPI00288939       | KIAA1640 protein           | MIRAMELAVAR        | a                        |
| IPI00472263       | KIAA1689 protein           | DIPMMEKVSGK        | a                        |
| IPI00472263       | KIAA1689 protein           | EDAEQVALEVDLNQK    | a                        |
| IPI00472263       | KIAA1689 protein           | ELTNVFEETGESHK     | a                        |
| IPI00434629       | KIAA1727 protein           | CQGVSLRK           | a                        |
| IPI00434629       | KIAA1727 protein           | EASPGASKPGSARR     | a                        |
| IPI00434629       | KIAA1727 protein           | FLPESEEVK          | a                        |
| IPI00434629       | KIAA1727 protein           | GGLPRDKPTK         | a                        |
| IPI00434629       | KIAA1727 protein           | IEAMVLK            | a                        |
| IPI00434629       | KIAA1727 protein           | LSLADSFYLIQVPNYSL  | a                        |
| IPI00434629       | KIAA1727 protein           | VKGDPEDAAPK        | a                        |
| IPI00106552       | KIAA1736 protein           | DMGLMNAIGLQPR      | a                        |
| IPI00106552       | KIAA1736 protein           | LLQELVEDK          | a                        |
| IPI00106552       | KIAA1736 protein           | LQQAHGGETSMMR      | a                        |
| IPI00106552       | KIAA1736 protein           | NARMSAPSLGRFVPR    | a                        |
| IPI00034201       | KIAA1746 protein           | AIASLK             | a                        |
| IPI00034201       | KIAA1746 protein           | EAKALEMQEKLK       | a                        |
| IPI00034201       | KIAA1746 protein           | SSDFAVLK           | a                        |
| IPI00034201       | KIAA1746 protein           | VATQGGIMITK        | a                        |
| IPI00307829       | KIAA1749 protein           | EERERMR            | a                        |
| IPI00307829       | KIAA1749 protein           | IQTLK              | a                        |
| IPI00307829       | KIAA1749 protein           | LTIEVAELQR         | a                        |
| IPI00307829       | KIAA1749 protein           | QMEDK              | a                        |
| IPI00307829       | KIAA1749 protein           | VEENSTLQORLEESEGE  | a                        |
| IPI00028255       | KIAA1757 protein           | KVSLLEYR           | a                        |
| IPI00028255       | KIAA1757 protein           | TFGNDARFIRR        | a                        |
| IPI00028255       | KIAA1757 protein           | YDCACHKGNR         | a                        |
| IPI00472805       | KIAA1770 protein           | ESLCEK             | a                        |
| IPI00472805       | KIAA1770 protein           | GWAPLPSGKQCAR      | a                        |
| IPI00472805       | KIAA1770 protein           | MNDHAEELSYK        | a                        |
| IPI00472805       | KIAA1770 protein           | TSSTDAGPAEEFPEPEE  | a                        |
| IPI00472805       | KIAA1770 protein           | HNCRFNFDAIVSNRAL   | a                        |
| IPI00470589       | KIAA1787 protein isoform 2 | NNYGCDDLALGTGAR    | a                        |
| IPI00470589       | KIAA1787 protein isoform 2 | VVAVVDLVYK         | a                        |
| IPI00400967       | KIAA1843 protein           | DIYFRR             | a                        |
| IPI00400967       | KIAA1843 protein           | GRSPVGNK           | a                        |
| IPI00400967       | KIAA1843 protein           | LNAVLK             | a                        |
| IPI00400967       | KIAA1843 protein           | SCARLVRAIK         | a                        |
| IPI00306458       | KIAA1864 protein           | AERERLEK           | a                        |
| IPI00306458       | KIAA1864 protein           | ISVREQTMSEKEELNK   | a                        |
| IPI00306458       | KIAA1864 protein           | METIER             | a                        |
| IPI00306458       | KIAA1864 protein           | NRGKYEIAFR         | a                        |
| IPI00306458       | KIAA1864 protein           | QVPSGGR            | a                        |
| IPI00306458       | KIAA1864 protein           | TYELTLK            | a                        |
| IPI00289801       | KIAA1885 protein           | KDVSGPLPPAYSPR     | a                        |
| IPI00289801       | KIAA1885 protein           | LSLQLELSK          | a                        |

| IPI Accession No. | Protein Description                                   | Peptide Sequence*  | Primary Source Dataset** |
|-------------------|-------------------------------------------------------|--------------------|--------------------------|
| IP00289838        | KIAA1911 protein                                      | CILNGINSLAK        | a                        |
| IP00289838        | KIAA1911 protein                                      | KVDEIR             | a                        |
| IP00289838        | KIAA1911 protein                                      | SSNWTK             | a                        |
| IP00044709        | KIAA1922 protein                                      | RQWSSSPFR          | a                        |
| IP00044709        | KIAA1922 protein                                      | SAPCRAGSGRR        | a                        |
| IP000217018       | KIAA2004 protein                                      | DFGNALNWK          | a                        |
| IP000217018       | KIAA2004 protein                                      | EYIENVVVR          | a                        |
| IP000217018       | KIAA2004 protein                                      | MQNYNNK            | a                        |
| IP000238220       | KIAA2022 protein                                      | SGAMNQSSSQKNTNR    | a                        |
| IP000238220       | KIAA2022 protein                                      | TAIGDPGR           | a                        |
| IP00455198        | KIAA2038 protein                                      | AGLTVGAPGRRPRGAHA  | a                        |
| IP00455198        | KIAA2038 protein                                      | IFVMEATTFSVK       | a                        |
| IP000216252       | Kinesin family member 1B                              | DSVLTWLLR          | e                        |
| IP000021634       | Kinesin light chain 2                                 | AMMVFFR            | a                        |
| IP00021634        | Kinesin light chain 2                                 | EKKLSQDEIVLGTKAVIQ | a                        |
| IP000021634       | Kinesin light chain 2                                 | FHPDVAK            | a                        |
| IP00300529        | Kinesin-like protein KIF1A                            | ELAVKCLR           | a                        |
| IP00300529        | Kinesin-like protein KIF1A                            | LDLMR              | a                        |
| IP00300529        | Kinesin-like protein KIF1A                            | LDYESK             | a                        |
| IP00300529        | Kinesin-like protein KIF1A                            | LLTHTFNR           | a                        |
| IP00300529        | Kinesin-like protein KIF1A                            | QEMEQR             | a                        |
| IP000179757       | Kinesin-like protein KIF1C                            | MFSARPPSPPLSSWER   | a                        |
| IP000179757       | Kinesin-like protein KIF1C                            | QEQLRLQGLQLWGP     | a                        |
| IP000179757       | Kinesin-like protein KIF1C                            | VISALADMOSK        | a                        |
| IP000179757       | Kinesin-like protein KIF1C                            | WATMADLK           | a                        |
| IP000010368       | Kinesin-like protein KIF2                             | QINPK              | d                        |
| IP00293884        | Kinesin-like protein KIF23                            | QLEMQNK            | c                        |
| IP00004533        | Kinesin-like protein KIF3B                            | AIVEDHSLVAEEKMR    | a                        |
| IP000151119       | Kinesin-like protein KIF3C                            | AHSAPSSGTSSRPGSIRR | a                        |
| IP000151119       | Kinesin-like protein KIF3C                            | AIEEFAR            | a                        |
| IP000151119       | Kinesin-like protein KIF3C                            | LREAQHINK          | a                        |
| IP000151119       | Kinesin-like protein KIF3C                            | MVENERLR           | a                        |
| IP000151119       | Kinesin-like protein KIF3C                            | TLMVVQVSPVEK       | a                        |
| IP000151119       | Kinesin-like protein KIF3C                            | VRSVELGPGLR        | a                        |
| IP000418411       | KRT8 protein                                          | AKQDMAR            | a                        |
| IP000418411       | KRT8 protein                                          | QLETLGQEK          | a                        |
| IP000651624       | kynureninase (L-kynurenine hydrolase) isoform b       | EGEETLR            | c                        |
| IP000217966       | lactate dehydrogenase A                               | DYNVTANSK          | c; d; e                  |
| IP000217966       | lactate dehydrogenase A                               | FIFPNVVK           | d                        |
| IP000217966       | lactate dehydrogenase A                               | GEMMDLQHGSLFLR     | c; d                     |
| IP000217966       | lactate dehydrogenase A                               | ISGFPK             | d                        |
| IP000217966       | lactate dehydrogenase A                               | LVITAGAR           | d                        |
| IP000217966       | lactate dehydrogenase A                               | NVNIFK             | c; d                     |
| IP000217966       | lactate dehydrogenase A                               | QVVESAYEVK         | d                        |
| IP000217966       | lactate dehydrogenase A                               | SADTLWGQK          | c; d                     |
| IP000217966       | lactate dehydrogenase A                               | YTLTSEEAR          | d                        |
| IP000217966       | lactate dehydrogenase A                               | YSPNCK             | e                        |
| IP000207066       | Lactoylglutathione lyase                              | CDFPIMK            | c; d                     |
| IP000207066       | Lactoylglutathione lyase                              | DFLLQQTMLR         | d                        |
| IP000207066       | Lactoylglutathione lyase                              | GFGHIGIAPDVSACK    | d                        |
| IP000207066       | Lactoylglutathione lyase                              | IAWALSR            | c                        |
| IP000207066       | Lactoylglutathione lyase                              | RFEELGVK           | c; d                     |
| IP000645031       | Lambda-crystallin                                     | IFAQDSDHDDR        | d                        |
| IP000645031       | Lambda-crystallin                                     | LFAGLVHVK          | d                        |
| IP000645031       | Lambda-crystallin                                     | LYDIEQQQR          | c                        |
| IP000645031       | Lambda-crystallin                                     | VPDDPEHLAAR        | c; d                     |
| IP000377045       | Laminin alpha 3 splice variant b1                     | CHCKPNFHGDNCEK     | a                        |
| IP000377045       | Laminin alpha 3 splice variant b1                     | FISLNIEDGK         | a                        |
| IP000377045       | Laminin alpha 3 splice variant b1                     | LKHISRRQSLR        | a                        |
| IP000377045       | Laminin alpha 3 splice variant b1                     | VWQDACSPLPK        | a                        |
| IP000375294       | Laminin alpha-1 chain precursor                       | EMSSNQK            | a                        |
| IP000375294       | Laminin alpha-1 chain precursor                       | GCLGEAFLNGK        | a                        |
| IP000375294       | Laminin alpha-1 chain precursor                       | ISDISVEVGR         | a                        |
| IP000375294       | Laminin alpha-1 chain precursor                       | LALIK              | a                        |
| IP000375294       | Laminin alpha-1 chain precursor                       | MQESNHLMLMVAANLR   | a                        |
| IP000289489       | Laminin alpha-5 chain precursor                       | DCLERFGPOTLER      | a                        |
| IP000289489       | Laminin alpha-5 chain precursor                       | FVMYMGSR           | a                        |
| IP000289489       | Laminin alpha-5 chain precursor                       | HPACMLPPLLRTTR     | a                        |
| IP000289489       | Laminin alpha-5 chain precursor                       | QRSRPGR            | a                        |
| IP000289489       | Laminin alpha-5 chain precursor                       | RCQCPGGR           | a                        |
| IP000289489       | Laminin alpha-5 chain precursor                       | TLOFGHMSVTVR       | a                        |
| IP000411639       | Laminin receptor-like protein LAMRL5                  | EEQAAEK            | d                        |
| IP000005724       | LanC-like protein 1                                   | AFFPNYADYVK        | c; d                     |
| IP000005724       | LanC-like protein 1                                   | FPAFEL             | c; d; e                  |
| IP000005724       | LanC-like protein 1                                   | IDPHAPNEMLYGR      | d                        |
| IP000005724       | LanC-like protein 1                                   | LTPEFSQR           | c                        |
| IP000005724       | LanC-like protein 1                                   | NFGVEK             | d                        |
| IP000005724       | LanC-like protein 1                                   | SLAEGYFDAAGR       | c; d                     |
| IP000008986       | Large neutral amino acids transporter small subunit 1 | SADGSAPAGEGEGVTLQR | d; e                     |
| IP000010700       | Large proline-rich protein BAT2                       | FTCPGVGESSLEPGAISP | a                        |
| IP000010700       | Large proline-rich protein BAT2                       | GGQLQSGPPQPPYR     | a                        |
| IP000010700       | Large proline-rich protein BAT2                       | KEPPK              | a                        |
| IP000010700       | Large proline-rich protein BAT2                       | LPASRSGAGPPPPRR    | a                        |
| IP000010700       | Large proline-rich protein BAT2                       | LRRDYSYR           | a                        |
| IP000010700       | Large proline-rich protein BAT2                       | LVEPVGRPSILK       | a                        |
| IP000010700       | Large proline-rich protein BAT2                       | QWRLRPGTFLSLHPYR   | a                        |
| IP000010700       | Large proline-rich protein BAT2                       | RGIPPEEGAPPRR      | a                        |
| IP000020665       | Latent TGF-beta binding protein-4                     | GPGAPCQDVDECAR     | a                        |
| IP000020665       | Latent TGF-beta binding protein-4                     | NLPGSFR            | a                        |
| IP000020665       | Latent TGF-beta binding protein-4                     | RVPPPCAPGR         | a                        |
| IP000020665       | Latent TGF-beta binding protein-4                     | TQEVCCR            | a                        |
| IP000020665       | Latent TGF-beta binding protein-4                     | VSGPWEADAEEAVAR    | a                        |
| IP000292150       | Latent transforming growth                            | AEEELARPPR         | a                        |
| IP000292150       | Latent transforming growth                            | AQPGWGSFR          | a                        |
| IP000292150       | Latent transforming growth                            | DPCKGKGR           | a                        |
| IP000292150       | Latent transforming growth                            | EQDAPVAGLQPVRR     | a                        |
| IP000292150       | Latent transforming growth                            | GHRTTYECCQDQDK     | a                        |



| IPI Accession No. | Protein Description                                                                | Peptide Sequence*   | Primary Source Dataset** |
|-------------------|------------------------------------------------------------------------------------|---------------------|--------------------------|
| IP00292150        | Latent transforming growth                                                         | SPNLRSSAAGEGTLAR    | a                        |
| IP00292150        | Latent transforming growth                                                         | VTNDVCSEPLRGHR      | a                        |
| IP00292150        | Latent transforming growth                                                         | VYSLFR              | a                        |
| IP00395783        | Latent transforming growth factor-beta                                             | FDMPDFEDDGGPYGESE   | a                        |
| IP00395783        | Latent transforming growth factor-beta                                             | REAPYGAPR           | a                        |
| IP00071824        | LB1 protein                                                                        | GRVLK               | a                        |
| IP00064742        | Leishmanolysin-like peptidase, variant 2                                           | AVAVCNLQK           | a                        |
| IP00064742        | Leishmanolysin-like peptidase, variant 2                                           | HTVYLLVTPR          | a                        |
| IP00064742        | Leishmanolysin-like peptidase, variant 2                                           | SAFVMEK             | a                        |
| IP00419237        | leucine aminopeptidase                                                             | TLEFLLR             | e                        |
| IP00006192        | Leucine zipper bearing kinase                                                      | SPLSNHAQR           | a                        |
| IP00006192        | Leucine zipper bearing kinase                                                      | VKTQMSLQK           | a                        |
| IP00006192        | Leucine zipper bearing kinase                                                      | VYRQNEIDKHLR        | a                        |
| IP00395737        | Leucine zipper protein 1                                                           | DAGMENESVK          | a                        |
| IP00395737        | Leucine zipper protein 1                                                           | ELESSEDR            | a                        |
| IP00395737        | Leucine zipper protein 1                                                           | ELSPQHK             | a                        |
| IP00395737        | Leucine zipper protein 1                                                           | MAELEK              | a                        |
| IP00395737        | Leucine zipper protein 1                                                           | QVSSPSFTNRR         | a                        |
| IP00017592        | Leucine zipper-EF-hand-containing transmembrane protein 1, mitochondrial precursor | VAEVEGEQVDNK        | d                        |
| IP00022417        | Leucine-rich alpha-2-glycoprotein                                                  | GPLQLER             | a                        |
| IP00022417        | Leucine-rich alpha-2-glycoprotein                                                  | LQVLGK              | a                        |
| IP00022417        | Leucine-rich alpha-2-glycoprotein                                                  | TLDLGENQLETLPPDLLR  | a                        |
| IP00022417        | Leucine-rich alpha-2-glycoprotein                                                  | VAAGAFQGLR          | a                        |
| IP00022417        | Leucine-rich alpha-2-glycoprotein                                                  | WLQAQKDKMFSQNDTR    | a                        |
| IP00166085        | Leucine-rich repeat LGI family member 2                                            | DVFDLDSLELDLR       | a                        |
| IP00166075        | Leucine-rich repeat LGI family member 3 precursor                                  | FQELAVQAPR          | d                        |
| IP00166075        | Leucine-rich repeat LGI family member 3 precursor                                  | FSEVQALPSR          | e                        |
| IP00002070        | Leucine-rich repeat-containing protein 8                                           | MNGSSMDK            | a                        |
| IP00002070        | Leucine-rich repeat-containing protein 8                                           | NKIEK               | a                        |
| IP00103994        | Leucyl-tRNA synthetase, cytoplasmic                                                | CEFAVGYQR           | a                        |
| IP00103994        | Leucyl-tRNA synthetase, cytoplasmic                                                | KVMPFVAMIK          | a                        |
| IP00103994        | Leucyl-tRNA synthetase, cytoplasmic                                                | TDQNYEK             | a                        |
| IP00103994        | Leucyl-tRNA synthetase, cytoplasmic                                                | VMPFVAMIK           | a                        |
| IP00103994        | Leucyl-tRNA synthetase, cytoplasmic                                                | VQDVK               | a                        |
| IP00297210        | L-FILIP                                                                            | ANFLSQLEEK          | a                        |
| IP00297210        | L-FILIP                                                                            | LKSFVMLVDER         | a                        |
| IP00297210        | L-FILIP                                                                            | LLEQEK              | a                        |
| IP00297210        | L-FILIP                                                                            | MSELEK              | a                        |
| IP00297210        | L-FILIP                                                                            | NMMEK               | a                        |
| IP00297210        | L-FILIP                                                                            | VQDLTQKLR           | a                        |
| IP00013303        | Limbic system-associated membrane protein precursor                                | CEASAVFAPDFEWYR     | d; e                     |
| IP00013303        | Limbic system-associated membrane protein precursor                                | EFEGEEVYLEILGTR     | d; e                     |
| IP00013303        | Limbic system-associated membrane protein precursor                                | SNEATTGR            | d                        |
| IP00418240        | LIM-nebulette                                                                      | QSFITVADTPENLR      | d                        |
| IP00418240        | LIM-nebulette                                                                      | TQEISNVK            | d                        |
| IP00000276        | Lipopolysaccharide-specific response 5-like protein                                | QEEAQLK             | d                        |
| IP00329124        | LISCH protein isoform 1                                                            | GPALTPR             | a                        |
| IP00329124        | LISCH protein isoform 1                                                            | SGDLPYDGR           | a                        |
| IP00329124        | LISCH protein isoform 1                                                            | SPTSNNGGRSRAVMPPR   | a                        |
| IP00329124        | LISCH protein isoform 1                                                            | SRPSRGPALTPR        | a                        |
| IP00219217        | L-lactate dehydrogenase B chain                                                    | FIPQIVK             | c; d; g                  |
| IP00219217        | L-lactate dehydrogenase B chain                                                    | GEMMDLQHGSLFLQTPK   | d                        |
| IP00219217        | L-lactate dehydrogenase B chain                                                    | GLTSVINQK           | c; d                     |
| IP00219217        | L-lactate dehydrogenase B chain                                                    | IHPVSTMVK           | d                        |
| IP00219217        | L-lactate dehydrogenase B chain                                                    | IVADKDYSVTANSK      | c; d                     |
| IP00219217        | L-lactate dehydrogenase B chain                                                    | IVVYTAGVR           | c; d; e                  |
| IP00219217        | L-lactate dehydrogenase B chain                                                    | LIAPVAEEAATVPNNK    | d                        |
| IP00219217        | L-lactate dehydrogenase B chain                                                    | LKDEVAQLK           | d                        |
| IP00219217        | L-lactate dehydrogenase B chain                                                    | LNLVQR              | d                        |
| IP00219217        | L-lactate dehydrogenase B chain                                                    | LSGLPK              | c; d                     |
| IP00219217        | L-lactate dehydrogenase B chain                                                    | MVYESAYEVK          | c; d                     |
| IP00219217        | L-lactate dehydrogenase B chain                                                    | NVNVFK              | d                        |
| IP00219217        | L-lactate dehydrogenase B chain                                                    | SADTLWDIQK          | d; e                     |
| IP00219217        | L-lactate dehydrogenase B chain                                                    | SLADELALVDVLEDK     | c; d                     |
| IP00219217        | L-lactate dehydrogenase B chain                                                    | VIGSGCNLDSAR        | c; d; e                  |
| IP00219217        | L-lactate dehydrogenase B chain                                                    | YLMAEK              | d                        |
| IP00065458        | LOC123872 protein                                                                  | DRACAEAWAR          | a                        |
| IP00065458        | LOC123872 protein                                                                  | DSEIRKQDTK          | a                        |
| IP00065458        | LOC123872 protein                                                                  | MELFK               | a; d                     |
| IP00450347        | LOC197322 protein                                                                  | EGELLVR             | c; d; e                  |
| IP00432867        | LOC285148 protein (Fragment)                                                       | DENPK               | d                        |
| IP00394856        | LOC374654 protein                                                                  | EETEQRKR            | a                        |
| IP00394856        | LOC374654 protein                                                                  | ELAINRMK            | a                        |
| IP00394856        | LOC374654 protein                                                                  | ELAINRMKEELIGELVR   | a                        |
| IP00394856        | LOC374654 protein                                                                  | EQQEMVELRLR         | a                        |
| IP00394856        | LOC374654 protein                                                                  | KEALMQEK            | a                        |
| IP00394856        | LOC374654 protein                                                                  | LRSSQALNEDIVR       | a                        |
| IP00394856        | LOC374654 protein                                                                  | QRLEIDGK            | a                        |
| IP0039367         | Long palate, lung and nasal epithelium carcinoma-associated protein 4              | IVELTLPR            | d                        |
| IP00478529        | Long transient receptor potential channel                                          | ASDLAFGHK           | a                        |
| IP00478529        | Long transient receptor potential channel                                          | LLGMEDDIFLR         | a                        |
| IP00478529        | Long transient receptor potential channel                                          | LLIENGVSMHR         | a                        |
| IP00478529        | Long transient receptor potential channel                                          | YLGPIVMMIGK         | a                        |
| IP00001718        | LRR FLI-1 interacting protein 1                                                    | EIQVQK              | a                        |
| IP00007700        | LW-1                                                                               | LLTEIAFQPLAEEASF    | a                        |
| IP00448095        | L-xylulose reductase                                                               | ECPGIEPCVDLGDWEATER | d                        |
| IP00477421        | lymphoid-restricted membrane protein                                               | AVEVMIHQVENLK       | a; c; d; d               |
| IP00477421        | lymphoid-restricted membrane protein                                               | NIGNAGMIVAGMENNDR   | a                        |
| IP00293088        | Lysosomal alpha-glucosidase precursor                                              | AGYIPLQGPGLTTTESR   | a                        |
| IP00293088        | Lysosomal alpha-glucosidase precursor                                              | AITQEQCEAR          | a                        |
| IP00216172        | Lysosomal-associated membrane protein 2C                                           | GILTVDELLAIR        | d                        |
| IP00217766        | Lysosome membrane protein 2                                                        | DEVLVFSPDFCR        | e                        |
| IP00217766        | Lysosome membrane protein 2                                                        | VEEVGPYYR           | e                        |
| IP001172591       | LYST-interacting protein LIP2                                                      | MADFWLTEK           | a                        |
| IP001172591       | LYST-interacting protein LIP2                                                      | MGLGPESR            | a                        |
| IP00014238        | Lysyl-tRNA synthetase                                                              | EAKQK               | a                        |
| IP00014238        | Lysyl-tRNA synthetase                                                              | INMVEELEKALGMK      | a                        |

| IPi Accession No. | Protein Description                                                            | Peptide Sequence*     | Primary Source Dataset** |
|-------------------|--------------------------------------------------------------------------------|-----------------------|--------------------------|
| IPi00014238       | Lysyl-tRNA synthetase                                                          | LIFYDLR               | a                        |
| IPi00014238       | Lysyl-tRNA synthetase                                                          | VDGSEPKLSK            | a                        |
| IPi00027341       | Macrophage capping protein                                                     | ANAQAALYK             | c                        |
| IPi00027341       | Macrophage capping protein                                                     | IYIWK                 | c                        |
| IPi00027341       | Macrophage capping protein                                                     | MOYAPNTQVEILPQGR      | c                        |
| IPi00293276       | Macrophage migration inhibitory factor                                         | IGGAQNR               | d                        |
| IPi00293276       | Macrophage migration inhibitory factor                                         | LLCGLLAER             | c; d; e; g               |
| IPi00293276       | Macrophage migration inhibitory factor                                         | PMFIVNTNVR            | d                        |
| IPi00291005       | Malate dehydrogenase, cytoplasmic                                              | AICDHVR               | d                        |
| IPi00291005       | Malate dehydrogenase, cytoplasmic                                              | DLDVAILVGSMPR         | d; e; g                  |
| IPi00291005       | Malate dehydrogenase, cytoplasmic                                              | ELTEEK                | d; e                     |
| IPi00291005       | Malate dehydrogenase, cytoplasmic                                              | ENFSCLTR              | c; d                     |
| IPi00291005       | Malate dehydrogenase, cytoplasmic                                              | ESAFEFSSA             | c; d; e                  |
| IPi00291005       | Malate dehydrogenase, cytoplasmic                                              | EVGVYEALK             | d                        |
| IPi00291005       | Malate dehydrogenase, cytoplasmic                                              | EVGVYEALKDDSWLK       | d                        |
| IPi00291005       | Malate dehydrogenase, cytoplasmic                                              | FVEGLPINDFSR          | d; e; g                  |
| IPi00291005       | Malate dehydrogenase, cytoplasmic                                              | GAAVIK                | d                        |
| IPi00291005       | Malate dehydrogenase, cytoplasmic                                              | GEFVTYVQR             | c; d; e; g               |
| IPi00291005       | Malate dehydrogenase, cytoplasmic                                              | KLSSAMSAK             | c                        |
| IPi00291005       | Malate dehydrogenase, cytoplasmic                                              | LDHNR                 | c                        |
| IPi00291005       | Malate dehydrogenase, cytoplasmic                                              | LGVTANDVK             | d                        |
| IPi00291005       | Malate dehydrogenase, cytoplasmic                                              | MDLTAK                | e                        |
| IPi00291005       | Malate dehydrogenase, cytoplasmic                                              | SAPSPK                | c                        |
| IPi00291005       | Malate dehydrogenase, cytoplasmic                                              | SQGAALDK              | d                        |
| IPi00291005       | Malate dehydrogenase, cytoplasmic                                              | VIVVGNPANTNCLTASK     | d                        |
| IPi00291006       | Malate dehydrogenase, mitochondrial precursor                                  | AGAGSATLSMAYAGAR      | d; e                     |
| IPi00291006       | Malate dehydrogenase, mitochondrial precursor                                  | ANTFVAELK             | c; d; e                  |
| IPi00291006       | Malate dehydrogenase, mitochondrial precursor                                  | EGVVECSFVK            | d                        |
| IPi00291006       | Malate dehydrogenase, mitochondrial precursor                                  | FVFSLYDAMNGK          | d                        |
| IPi00291006       | Malate dehydrogenase, mitochondrial precursor                                  | GYLGPQLPDCLEK         | c; d; e                  |
| IPi00291006       | Malate dehydrogenase, mitochondrial precursor                                  | HGVYVPSK              | c; d                     |
| IPi00291006       | Malate dehydrogenase, mitochondrial precursor                                  | IFGVITLDIR            | d; e; g                  |
| IPi00291006       | Malate dehydrogenase, mitochondrial precursor                                  | IQEAGTEVVK            | c; d; e                  |
| IPi00291006       | Malate dehydrogenase, mitochondrial precursor                                  | KGEDFVK               | d                        |
| IPi00291006       | Malate dehydrogenase, mitochondrial precursor                                  | LTLYDIAHTPGVAADLSHETK | d                        |
| IPi00291006       | Malate dehydrogenase, mitochondrial precursor                                  | MISDAIPELK            | d; e                     |
| IPi00291006       | Malate dehydrogenase, mitochondrial precursor                                  | NLIGIK                | c; d                     |
| IPi00291006       | Malate dehydrogenase, mitochondrial precursor                                  | NSPLYSR               | e                        |
| IPi00291006       | Malate dehydrogenase, mitochondrial precursor                                  | SQETETIYESTPLLLGK     | c; d                     |
| IPi00291006       | Malate dehydrogenase, mitochondrial precursor                                  | THPLISQCTPK           | c; d                     |
| IPi00291006       | Malate dehydrogenase, mitochondrial precursor                                  | VAVLGASGGIGQPLSLLLK   | d; e                     |
| IPi00291006       | Malate dehydrogenase, mitochondrial precursor                                  | VDFPQDLTALTGR         | c; d; e                  |
| IPi00291006       | Malate dehydrogenase, mitochondrial precursor                                  | VNVPVIGHAGK           | d; e                     |
| IPi00291006       | Malate dehydrogenase, mitochondrial precursor                                  | YSSFEEK               | c; d; e                  |
| IPi00607577       | manganese superoxide dismutase isoform B precursor                             | AIVNVINWVNTER         | c; d; e                  |
| IPi00607577       | manganese superoxide dismutase isoform B precursor                             | DFGSFDK               | d                        |
| IPi00607577       | manganese superoxide dismutase isoform B precursor                             | GELLEAIK              | d                        |
| IPi00607577       | manganese superoxide dismutase isoform B precursor                             | NVRPDIYK              | c; d                     |
| IPi00607577       | manganese superoxide dismutase isoform B precursor                             | YQALAK                | c; d                     |
| IPi00012989       | Mannosidase, alpha, class 2B, MeMber 1                                         | EQASLFQMGDFGFFFG      | a                        |
| IPi00012989       | Mannosidase, alpha, class 2B, MeMber 1                                         | LYPGQR                | a                        |
| IPi00291641       | Mannosyl-oligosaccharide                                                       | EEGAPGDPEAALEDNLA     | a                        |
| IPi00291641       | Mannosyl-oligosaccharide                                                       | LPEEIQR               | a                        |
| IPi00299669       | Mannosyl-oligosaccharide                                                       | RLFLAPR               | a                        |
| IPi00291641       | Mannosyl-oligosaccharide                                                       | WAWEAVEALENHCR        | a                        |
| IPi00032288       | MANSC domain containing protein 1                                              | IITDFPSLTR            | a                        |
| IPi00032288       | MANSC domain containing protein 1                                              | SLEDVIDIQSSLSK        | a                        |
| IPi00107838       | MAP kinase-activating death domain                                             | APSATGK               | a                        |
| IPi00107838       | MAP kinase-activating death domain                                             | DPGLAGRGDPK           | a                        |
| IPi00107838       | MAP kinase-activating death domain                                             | GVQRDTMWR             | a                        |
| IPi00107838       | MAP kinase-activating death domain                                             | RLLSEQLR              | a                        |
| IPi00107838       | MAP kinase-activating death domain                                             | SNMDRR                | a                        |
| IPi00107838       | MAP kinase-activating death domain                                             | WWYEEK                | a                        |
| IPi00290842       | MAP4 protein                                                                   | APEKRASPKPASAPAS      | a                        |
| IPi00290842       | MAP4 protein                                                                   | DMEIAQTQK             | a                        |
| IPi00290842       | MAP4 protein                                                                   | WPTETDVSSAK           | a                        |
| IPi00107844       | MAP-kinase activating death domain-containing protein isoform a                | EAEFPGPDSSENSQENPPLR  | e                        |
| IPi00641181       | MARCKS-related protein                                                         | GDVTAEEAAGASPAK       | c                        |
| IPi00385140       | MasA                                                                           | AEFFADVPAVR           | d                        |
| IPi00028714       | Matrix Gla-protein precursor                                                   | ERSKPVHELNR           | a                        |
| IPi00063130       | MBP-2                                                                          | GLGGEVPGSHQGPDPYR     | e                        |
| IPi00144243       | MBP-2                                                                          | GASGESFSKDPVYLSK      | a                        |
| IPi00144243       | MBP-2                                                                          | MSPGPPILDIASR         | a                        |
| IPi00144243       | MBP-2                                                                          | QKLALR                | a                        |
| IPi00144243       | MBP-2                                                                          | SGIPLPNESSQVIGPDMLEK  | a                        |
| IPi00008231       | Membrane protein CH1                                                           | DEGRAWTSRWLQR         | a                        |
| IPi00008231       | Membrane protein CH1                                                           | EDMNSMQIFTK           | a                        |
| IPi00008231       | Membrane protein CH1                                                           | EDVPSGR               | a                        |
| IPi00008231       | Membrane protein CH1                                                           | WCSVRVALYRQR          | a                        |
| IPi00220739       | Membrane-associated progesterone receptor component 1                          | DFTPAELR              | e                        |
| IPi00220739       | Membrane-associated progesterone receptor component 1                          | FYGPGEVYGFVAGR        | e                        |
| IPi00005202       | Membrane-associated progesterone receptor component 2                          | GLGAGAGAGEESPATSLPR   | e                        |
| IPi00397466       | MeMbrane-bound transcription factor                                            | ERTNWTNER             | e                        |
| IPi00397466       | MeMbrane-bound transcription factor                                            | IPVDPVRRDLVALPVR      | a                        |
| IPi00016666       | Metallothionein-3                                                              | CTSK                  | c                        |
| IPi00016666       | Metallothionein-3                                                              | GGEAAEAEEAK           | c; d; e                  |
| IPi00016666       | Metallothionein-3                                                              | SCCSCPAECEK           | d                        |
| IPi00171798       | Metastasis-associated protein MTA2                                             | DTRALR                | c                        |
| IPi00024990       | Methylmalonate-semialdehyde dehydrogenase [acylating], mitochondrial precursor | AEMDAIASCK            | d                        |
| IPi00024990       | Methylmalonate-semialdehyde dehydrogenase [acylating], mitochondrial precursor | AFPWADTSLVSR          | d; e                     |
| IPi00024990       | Methylmalonate-semialdehyde dehydrogenase [acylating], mitochondrial precursor | AGEYIFER              | e                        |
| IPi00024990       | Methylmalonate-semialdehyde dehydrogenase [acylating], mitochondrial precursor | DMDLYSYR              | d                        |
| IPi00024990       | Methylmalonate-semialdehyde dehydrogenase [acylating], mitochondrial precursor | EGASILLDGR            | e                        |
| IPi00024990       | Methylmalonate-semialdehyde dehydrogenase [acylating], mitochondrial precursor | GDINFYGK              | d                        |
| IPi00024990       | Methylmalonate-semialdehyde dehydrogenase [acylating], mitochondrial precursor | LFIGGK                | c; d                     |
| IPi00024990       | Methylmalonate-semialdehyde dehydrogenase [acylating], mitochondrial precursor | QGIQFYTLK             | d                        |
| IPi00024990       | Methylmalonate-semialdehyde dehydrogenase [acylating], mitochondrial precursor | TLADAEGVFR            | d; e                     |

| IPI Accession No. | Protein Description                                                            | Peptide Sequence*     | Primary Source Dataset** |
|-------------------|--------------------------------------------------------------------------------|-----------------------|--------------------------|
| IPI00024990       | Methylmalonate-semialdehyde dehydrogenase [acylating], mitochondrial precursor | VCNLDISGDK            | d                        |
| IPI00024990       | Methylmalonate-semialdehyde dehydrogenase [acylating], mitochondrial precursor | VQANMGAK              | d                        |
| IPI00024990       | Methylmalonate-semialdehyde dehydrogenase [acylating], mitochondrial precursor | WIDHNPATNEVIGR        | d                        |
| IPI00024934       | Methylmalonyl-CoA mutase, mitochondrial precursor                              | EFMVR                 | d                        |
| IPI00060265       | MGC33584 protein                                                               | GQAGLAGPEPRQFCN       | a                        |
| IPI00060265       | MGC33584 protein                                                               | RFSQK                 | a                        |
| IPI00060265       | MGC33584 protein                                                               | WAPPTQDAGLAGR         | a                        |
| IPI00478438       | MHC class I antigen precursor                                                  | FISVGVYDDTFQVR        | a                        |
| IPI00152491       | MIC2L1 isoform E3-E4'-E3-E4                                                    | DLEDIVGGGEYKPKD       | a                        |
| IPI00152491       | MIC2L1 isoform E3-E4'-E3-E4                                                    | YSTLHTQSAEPPPPPEPA    | a                        |
| IPI00470635       | MICAL2                                                                         | IREKAEDQHFESFVFSR     | a                        |
| IPI00470635       | MICAL2                                                                         | SLEPLLSNSEGGKK        | a                        |
| IPI00470635       | MICAL2                                                                         | SPLRLIANAIR           | a                        |
| IPI00002374       | Microcephalin                                                                  | LQLCRSEGR             | a                        |
| IPI00002374       | Microcephalin                                                                  | QAAGMSQFTFEK          | a                        |
| IPI00002374       | Microcephalin                                                                  | QNVVIVYVDK            | a                        |
| IPI00639812       | Mitochondrial glutathione S-transferase 3                                      | IASGLGLAWIVGR         | e                        |
| IPI00639812       | Mitochondrial glutathione S-transferase 3                                      | SGLSGGPK              | c; d; e                  |
| IPI00478739       | Microtubule-actin crosslinking factor 1                                        | IGLLDLMQR             | a                        |
| IPI00478739       | Microtubule-actin crosslinking factor 1                                        | LLHFQNAVEIEK          | a                        |
| IPI00478739       | Microtubule-actin crosslinking factor 1                                        | LYDENMVR              | a                        |
| IPI00478739       | Microtubule-actin crosslinking factor 1                                        | QLQTGGIDITVIGQR       | a                        |
| IPI00020356       | Microtubule-associated protein 1A                                              | AENEAAACPWAWER        | d; e                     |
| IPI00020356       | Microtubule-associated protein 1A                                              | ALALAPGPTTR           | d; e                     |
| IPI00020356       | Microtubule-associated protein 1A                                              | ALGLEESLVQEGR         | d                        |
| IPI00020356       | Microtubule-associated protein 1A                                              | DFQESSPK              | d                        |
| IPI00020356       | Microtubule-associated protein 1A                                              | DSKEMQFLMQK           | a                        |
| IPI00020356       | Microtubule-associated protein 1A                                              | ELGQKAKEK             | a                        |
| IPI00020356       | Microtubule-associated protein 1A                                              | ELSNPQTTPPAQK         | d                        |
| IPI00020356       | Microtubule-associated protein 1A                                              | ELVPEVPEEQGSK         | d                        |
| IPI00020356       | Microtubule-associated protein 1A                                              | EPTPYPDER             | e                        |
| IPI00020356       | Microtubule-associated protein 1A                                              | ESTFLDEGPDDEQEVPLR    | c; d; e                  |
| IPI00020356       | Microtubule-associated protein 1A                                              | GTVPLPTISGHR          | d                        |
| IPI00020356       | Microtubule-associated protein 1A                                              | HLDFLR                | d                        |
| IPI00020356       | Microtubule-associated protein 1A                                              | HQAQEQK               | d                        |
| IPI00020356       | Microtubule-associated protein 1A                                              | KVNGEREIEGR           | a                        |
| IPI00020356       | Microtubule-associated protein 1A                                              | LEALLEK               | a                        |
| IPI00020356       | Microtubule-associated protein 1A                                              | SEPDQFQEADSWGDTK      | e                        |
| IPI00020356       | Microtubule-associated protein 1A                                              | SHATTEPEQTEPEQR       | c; d; e                  |
| IPI00020356       | Microtubule-associated protein 1A                                              | SPEHSPPASPPEMVGQR     | d                        |
| IPI00020356       | Microtubule-associated protein 1A                                              | SPTPGKGSXDR           | a                        |
| IPI00020356       | Microtubule-associated protein 1A                                              | TADLDFFR              | c                        |
| IPI00020356       | Microtubule-associated protein 1A                                              | TPGVGK                | a                        |
| IPI00020356       | Microtubule-associated protein 1A                                              | TRYDEYLEVTK           | a                        |
| IPI00020356       | Microtubule-associated protein 1A                                              | XEPGSMIEFLTPPVP       | a                        |
| IPI00008868       | Microtubule-associated protein 1B                                              | AEADAYIR              | d                        |
| IPI00008868       | Microtubule-associated protein 1B                                              | ASLTLFCPEEGDWK        | d                        |
| IPI00008868       | Microtubule-associated protein 1B                                              | EEVEPEK               | d                        |
| IPI00008868       | Microtubule-associated protein 1B                                              | HMDPPAPVQDRSPSR       | a                        |
| IPI00008868       | Microtubule-associated protein 1B                                              | LEMYVLNPKSSK          | a                        |
| IPI00008868       | Microtubule-associated protein 1B                                              | MSISEGTVSDK           | a                        |
| IPI00008868       | Microtubule-associated protein 1B                                              | SDVLETVVLINPDEAVSTEVR | d; e                     |
| IPI00008868       | Microtubule-associated protein 1B                                              | VLSPLR                | a                        |
| IPI00374770       | Microtubule-associated protein 1B isoform 2                                    | AVLDALLEGK            | c; d; e                  |
| IPI00374770       | Microtubule-associated protein 1B isoform 2                                    | DLSTPGLEK             | e                        |
| IPI00374770       | Microtubule-associated protein 1B isoform 2                                    | DLTGQVPTPVVK          | c; d                     |
| IPI00374770       | Microtubule-associated protein 1B isoform 2                                    | ELEAER                | c; d                     |
| IPI00374770       | Microtubule-associated protein 1B isoform 2                                    | ESSPLYSPTFSDTSAVK     | e                        |
| IPI00374770       | Microtubule-associated protein 1B isoform 2                                    | ETEPVEAYVIQK          | d                        |
| IPI00374770       | Microtubule-associated protein 1B isoform 2                                    | EVPSKEEPSVK           | c; d                     |
| IPI00374770       | Microtubule-associated protein 1B isoform 2                                    | EWYQTHEK              | e                        |
| IPI00374770       | Microtubule-associated protein 1B isoform 2                                    | GAESPFEEK             | c; d; e                  |
| IPI00374770       | Microtubule-associated protein 1B isoform 2                                    | HLDFLK                | d                        |
| IPI00374770       | Microtubule-associated protein 1B isoform 2                                    | KTDVVEAMSSQPALALDER   | c; d                     |
| IPI00374770       | Microtubule-associated protein 1B isoform 2                                    | LEMYVLNPK             | c                        |
| IPI00374770       | Microtubule-associated protein 1B isoform 2                                    | NAANASAK              | c; d                     |
| IPI00374770       | Microtubule-associated protein 1B isoform 2                                    | NLISPDLGVVFLNVPENLK   | d; e                     |
| IPI00374770       | Microtubule-associated protein 1B isoform 2                                    | NVDVEFK               | c; d                     |
| IPI00374770       | Microtubule-associated protein 1B isoform 2                                    | QPLATQK               | c; d; e                  |
| IPI00374770       | Microtubule-associated protein 1B isoform 2                                    | SPDEEDYDYESYK         | c; d; e                  |
| IPI00374770       | Microtubule-associated protein 1B isoform 2                                    | SPSDSGYSYETIGK        | e                        |
| IPI00374770       | Microtubule-associated protein 1B isoform 2                                    | SSYVYVSGNDPAEEPSR     | c; d; e                  |
| IPI00374770       | Microtubule-associated protein 1B isoform 2                                    | STDFAPKEDFGQEK        | d; e                     |
| IPI00374770       | Microtubule-associated protein 1B isoform 2                                    | SVGNTIDPVLVQK         | c                        |
| IPI00374770       | Microtubule-associated protein 1B isoform 2                                    | TATAGPGTTK            | c; d; e                  |
| IPI00374770       | Microtubule-associated protein 1B isoform 2                                    | TPEGGYSYDISEK         | d; e                     |
| IPI00374770       | Microtubule-associated protein 1B isoform 2                                    | TPGDFSYAQKPEETR       | c; d; e                  |
| IPI00374770       | Microtubule-associated protein 1B isoform 2                                    | TPVQDHR               | d                        |
| IPI00374770       | Microtubule-associated protein 1B isoform 2                                    | TSVGGYYIEK            | e                        |
| IPI00374770       | Microtubule-associated protein 1B isoform 2                                    | VSPSK                 | c                        |
| IPI00420071       | Microtubule-associated protein 6 isoform 1                                     | AGPAWIYR              | e                        |
| IPI00420071       | Microtubule-associated protein 6 isoform 1                                     | ATGPAPGTGER           | d                        |
| IPI00420071       | Microtubule-associated protein 6 isoform 1                                     | ATGPAPGPTGERREPAAGPGR | d                        |
| IPI00420071       | Microtubule-associated protein 6 isoform 1                                     | AVAIETPQAQGLDAVAR     | c; d; e                  |
| IPI00420071       | Microtubule-associated protein 6 isoform 1                                     | DPQLPTVSLPR           | d; e                     |
| IPI00420071       | Microtubule-associated protein 6 isoform 1                                     | EEVASVSSSYR           | d                        |
| IPI00420071       | Microtubule-associated protein 6 isoform 1                                     | EQEAAPGAGGGLAAGK      | c; d; e                  |
| IPI00420071       | Microtubule-associated protein 6 isoform 1                                     | QAVSQAAK              | c; d; e                  |
| IPI00420071       | Microtubule-associated protein 6 isoform 1                                     | SAEGPSTTKPDDKEQSK     | d                        |
| IPI00420071       | Microtubule-associated protein 6 isoform 1                                     | SEVQPSDAPFER          | d; e                     |
| IPI00420071       | Microtubule-associated protein 6 isoform 1                                     | WPFQAAAEAR            | d; e                     |
| IPI00017596       | Microtubule-associated protein RP/EB family member 1                           | DFYFGK                | d                        |
| IPI00017596       | Microtubule-associated protein tau                                             | ESPLQTPTEGSEEGSETSADK | e                        |
| IPI00167941       | Midasin                                                                        | ESPLPR                | a                        |
| IPI00167941       | Midasin                                                                        | KCVVSR                | a                        |
| IPI00167941       | Midasin                                                                        | LIWLPLR               | a                        |
| IPI00167941       | Midasin                                                                        | LQSGHLTK              | a                        |

| IPI Accession No. | Protein Description                                            | Peptide Sequence*  | Primary Source Dataset** |
|-------------------|----------------------------------------------------------------|--------------------|--------------------------|
| IP100167941       | Midasin                                                        | LVQALLEK           | d                        |
| IP100167941       | Midasin                                                        | MLLGMYR            | a                        |
| IP100167941       | Midasin                                                        | NRGLEIYISGEGDASTPD | a                        |
| IP100167941       | Midasin                                                        | QSEAVHLQR          | a                        |
| IP100167941       | Midasin                                                        | SRSLEGR            | a                        |
| IP100167941       | Midasin                                                        | TALSEEEEEER        | a                        |
| IP100025465       | Mimecan precursor                                              | ANDTSYIR           | a                        |
| IP100025465       | Mimecan precursor                                              | DFADIPNLR          | a                        |
| IP100025465       | Mimecan precursor                                              | ETVHPNEK           | a                        |
| IP100025465       | Mimecan precursor                                              | RLPIGSYF           | a                        |
| IP100031109       | Mimitin, mitochondrial precursor                               | EVDYEAGDIPTEWEAWIR | d; e                     |
| IP100185667       | MIST                                                           | DGSFLVR            | a                        |
| IP100007052       | Mitochondria fission 1 protein                                 | GIVLEELLPK         | d                        |
| IP100219729       | Mitochondrial 2-oxoglutarate/malate carrier protein            | EEGVLTLLR          | d; e                     |
| IP100219729       | Mitochondrial 2-oxoglutarate/malate carrier protein            | GFTPYAR            | e                        |
| IP100219729       | Mitochondrial 2-oxoglutarate/malate carrier protein            | NVENALIR           | d; e                     |
| IP100219729       | Mitochondrial 2-oxoglutarate/malate carrier protein            | YEGFFSLWK          | d                        |
| IP100007084       | Mitochondrial aspartate-glutamate carrier protein              | IAPLEEGTLPFNLAEAQR | e                        |
| IP100419997       | Mitochondrial ATP-Mg/Pi carrier                                | ALGISISLEQAEK      | a                        |
| IP100419997       | Mitochondrial ATP-Mg/Pi carrier                                | ILREGPR            | a                        |
| IP100419997       | Mitochondrial ATP-Mg/Pi carrier                                | MIRGSPGDAERR       | a                        |
| IP100419997       | Mitochondrial ATP-Mg/Pi carrier                                | QLVAGAVAGAVSR      | a                        |
| IP100003833       | Mitochondrial carrier homolog 2                                | GLFTGLTPR          | d                        |
| IP100003004       | Mitochondrial glutamate carrier 1                              | GVNEDTYSGLDCAR     | d; e                     |
| IP100003004       | Mitochondrial glutamate carrier 1                              | IQLQDAGR           | d                        |
| IP100028376       | Mitochondrial import inner membrane translocase subunit Tim8 A | FIDTSQFLNR         | e                        |
| IP100024976       | Mitochondrial import receptor subunit TOM22 homolog            | LQMEQQQLQQR        | e                        |
| IP100024976       | Mitochondrial import receptor subunit TOM22 homolog            | LWGLTEMPFER        | e                        |
| IP100747874       | Mitochondrial NADP(+)-dependent malic enzyme 3                 | AYDDLDEFMQAVTDK    | d; e                     |
| IP100015602       | Mitochondrial precursor proteins import receptor               | ILLDQVEEAVADFECIR  | d                        |
| IP100015602       | Mitochondrial precursor proteins import receptor               | QYMEENYDK          | d; e                     |
| IP100015602       | Mitochondrial precursor proteins import receptor               | SYFSFTDDISQPMLEK   | e                        |
| IP100428447       | Mitochondrial tuMor suppressor 1 isoform                       | KGHEIEK            | a                        |
| IP100428447       | Mitochondrial tuMor suppressor 1 isoform                       | LRDTYIEAEK         | a                        |
| IP100428447       | Mitochondrial tuMor suppressor 1 isoform                       | QESLEK             | a                        |
| IP100428450       | Mitochondrial tuMor suppressor 1 isoform                       | TGNAAVIK           | a                        |
| IP100428447       | Mitochondrial tuMor suppressor 1 isoform                       | VGPPVSLRNSDNR      | a                        |
| IP100003479       | Mitogen-activated protein kinase 1                             | APTIEQMK           | d                        |
| IP100003479       | Mitogen-activated protein kinase 1                             | DVYIQDLMETDLYK     | d                        |
| IP100003479       | Mitogen-activated protein kinase 1                             | ELIFETAR           | c; d                     |
| IP100003479       | Mitogen-activated protein kinase 1                             | FQPGYR             | d                        |
| IP100003479       | Mitogen-activated protein kinase 1                             | GQYFDVGR           | c; d; e                  |
| IP100003479       | Mitogen-activated protein kinase 1                             | HENIGINDIR         | d                        |
| IP100003479       | Mitogen-activated protein kinase 1                             | ICDFGLAR           | c; d                     |
| IP100003479       | Mitogen-activated protein kinase 1                             | ISPFHQTYCQR        | d                        |
| IP100003479       | Mitogen-activated protein kinase 1                             | LFPNADSK           | d                        |
| IP100003479       | Mitogen-activated protein kinase 1                             | NYLLSLPHK          | d                        |
| IP100148567       | mitogen-activated protein kinase 10 isoform 4                  | GQPSAQVQQ          | e                        |
| IP100186536       | Mitogen-activated protein kinase kinase                        | ALKQMGRLR          | a                        |
| IP100186536       | Mitogen-activated protein kinase kinase                        | DTASKLGPIEAIQK     | a                        |
| IP100186536       | Mitogen-activated protein kinase kinase                        | ECKEVLKGGLLMK      | a                        |
| IP100186536       | Mitogen-activated protein kinase kinase                        | HPNLVRYFGVELHR     | a                        |
| IP100186536       | Mitogen-activated protein kinase kinase                        | LCPIEAIQK          | a                        |
| IP100186536       | Mitogen-activated protein kinase kinase                        | QTSRTDCPADR        | a                        |
| IP100141933       | Mitotic checkpoint                                             | DGELWNKFFVR        | a                        |
| IP100141933       | Mitotic checkpoint                                             | ENVQPLRQGR         | a                        |
| IP100141933       | Mitotic checkpoint                                             | FYTGNDPLDVWDR      | a                        |
| IP100141933       | Mitotic checkpoint                                             | LFWVAPR            | a                        |
| IP100142487       | Mixed lineage kinase 4beta                                     | APGPRRAR           | a                        |
| IP100142487       | Mixed lineage kinase 4beta                                     | GEDELSLR           | a                        |
| IP100142487       | Mixed lineage kinase 4beta                                     | LDTDCVSR           | a                        |
| IP100142487       | Mixed lineage kinase 4beta                                     | REQLAER            | a                        |
| IP100027415       | MLEL1 protein                                                  | DPFVPLGKEK         | a                        |
| IP100027415       | MLEL1 protein                                                  | EHRGQFK            | a                        |
| IP100027415       | MLEL1 protein                                                  | RTPPGVRK           | a                        |
| IP100337645       | MOBP                                                           | QQPAAPPVVR         | c; d; e                  |
| IP100219365       | Moesin                                                         | ALELEQER           | c; d                     |
| IP100219365       | Moesin                                                         | APDFVYAPR          | c; d                     |
| IP100219365       | Moesin                                                         | FYPEDVSEELIQDITQR  | d                        |
| IP100219365       | Moesin                                                         | LFFLQVK            | c; d                     |
| IP100333125       | MOG protein                                                    | DQDQDAPEYR         | a; c; d; e               |
| IP100333125       | MOG protein                                                    | ETEATRGR           | a                        |
| IP100333125       | MOG protein                                                    | IKSQER             | a                        |
| IP100333125       | MOG protein                                                    | RLAGQFLEELR        | a                        |
| IP100177967       | M-phase phosphoprotein 9                                       | AHVEDGGR           | a                        |
| IP100177967       | M-phase phosphoprotein 9                                       | ENLSPGSHLLSK       | a                        |
| IP100177967       | M-phase phosphoprotein 9                                       | MFQDLLGEYSLGKEHR   | a                        |
| IP100177967       | M-phase phosphoprotein 9                                       | MGFFLSSESR         | a                        |
| IP100177967       | M-phase phosphoprotein 9                                       | NNLLEIEVNDLR       | a                        |
| IP100177967       | M-phase phosphoprotein 9                                       | SSSLPPSNRK         | a                        |
| IP100045914       | Mxs2-interacting protein                                       | AEKPDATADAEPDANQK  | a                        |
| IP100045914       | Mxs2-interacting protein                                       | AHNSYK             | a                        |
| IP100045914       | Mxs2-interacting protein                                       | EGRYER             | a                        |
| IP100045914       | Mxs2-interacting protein                                       | GRRPER             | a                        |
| IP100045914       | Mxs2-interacting protein                                       | IGIDIDHTQSYR       | a                        |
| IP100045914       | Mxs2-interacting protein                                       | SEEAPEK            | a                        |
| IP100045914       | Mxs2-interacting protein                                       | SSRQSEDSER         | a                        |
| IP100045914       | Mxs2-interacting protein                                       | VQNLVPR            | a                        |
| IP100045914       | Mxs2-interacting protein                                       | YYDDPREYR          | a                        |
| IP100329503       | MTR1                                                           | AQGDGRPR           | a                        |
| IP100329503       | MTR1                                                           | SVSRKSLFDLLQR      | a                        |
| IP100329503       | MTR1                                                           | VVAVGMSLGR         | a                        |
| IP100000949       | Mu-crystallin homolog                                          | EAVLYVDSQEAALK     | d                        |
| IP100000949       | Mu-crystallin homolog                                          | FADTVQGEVR         | d                        |
| IP100000949       | Mu-crystallin homolog                                          | GYLGVMPAYSAEDALTK  | d                        |
| IP100000949       | Mu-crystallin homolog                                          | LIYDSWSSGK         | c; d                     |
| IP100000949       | Mu-crystallin homolog                                          | LVTVEYDR           | c; d                     |

| IPI Accession No. | Protein Description                                | Peptide Sequence*   | Primary Source Dataset** |
|-------------------|----------------------------------------------------|---------------------|--------------------------|
| IP10000949        | Mu-crystallin homolog                              | TTVFK               | c                        |
| IP10000949        | Mu-crystallin homolog                              | VPFLSAAVEVEHLR      | c; d; e                  |
| IP10006675        | Multidrug resistance-associated protein 4          | SGIDFGSLIK          | c                        |
| IP100029455       | Multidrug resistance-associated protein 6          | ENSSSELVSR          | a                        |
| IP100029455       | Multidrug resistance-associated protein 6          | LLFQR               | a                        |
| IP100217223       | Multifunctional protein ADE2                       | ASLNTWISLK          | d                        |
| IP100217223       | Multifunctional protein ADE2                       | VELFFK              | d                        |
| IP100418392       | Multimerin 1                                       | TSEDSLIK            | c                        |
| IP100015525       | Multimerin-2 precursor                             | DLEAPR              | d                        |
| IP100396279       | Multiple asters 1                                  | IMDQAANPQYVWDR      | a                        |
| IP100396279       | Multiple asters 1                                  | MGADLLGVSQAK        | a                        |
| IP100396279       | Multiple asters 1                                  | QMDPTDFVNSSETR      | a                        |
| IP100328680       | Multiple coagulation factor deficiency             | EEGSEQAPLMSEDELINI  | a                        |
| IP100027310       | Multiple EGF-like-domain protein 4                 | WTQMLGAEDGGPGPS     | a                        |
| IP100163612       | Multiple PDZ domain protein                        | AGNPVFMVQSIINRPR    | a                        |
| IP100163612       | Multiple PDZ domain protein                        | IIFIR               | a                        |
| IP100019353       | Multi-substrate lipid kinase variant               | EQMLTSTPTQ          | e                        |
| IP100019353       | Multi-substrate lipid kinase variant               | EQPVFAMTGLR         | e                        |
| IP100289243       | Muscle, skeletal, receptor tyrosine kinase         | AVLPCTIMGNPKPSVSW   | a                        |
| IP100289243       | Muscle, skeletal, receptor tyrosine kinase         | DLATRNLVGENMVK      | a                        |
| IP100289243       | Muscle, skeletal, receptor tyrosine kinase         | LPHLDVNK            | a                        |
| IP100061733       | Mutated endophilin A1 BAR domain                   | YGAEGTK             | c; d; e                  |
| IP100385965       | Myo17 protein                                      | LDDLNVNWAR          | d; e                     |
| IP100375253       | Myelin associated glycoprotein isoform b precursor | EFVYSER             | c; e                     |
| IP100375253       | Myelin associated glycoprotein isoform b precursor | GQAQAPPR            | e                        |
| IP100375253       | Myelin associated glycoprotein isoform b precursor | LLGLGLR             | a; c; d                  |
| IP100375253       | Myelin associated glycoprotein isoform b precursor | NLYGAK              | c                        |
| IP100375253       | Myelin associated glycoprotein isoform b precursor | SLELPFQGAHR         | d                        |
| IP100375253       | Myelin associated glycoprotein isoform b precursor | SNPEPSVAFELPSR      | d                        |
| IP100216475       | Myelin basic protein                               | FSWGAEGQRPGFYGGRR   | c; d; e                  |
| IP100216475       | Myelin basic protein                               | GLSLSR              | c                        |
| IP100219533       | Myelin P2 protein                                  | ALGVGLATR           | c                        |
| IP100219533       | Myelin P2 protein                                  | FLGTWK              | c; d                     |
| IP100219533       | Myelin P2 protein                                  | GSLNOVQR            | c                        |
| IP100219533       | Myelin P2 protein                                  | KGDIITR             | c                        |
| IP100219533       | Myelin P2 protein                                  | LGQFEETTADNR        | c                        |
| IP100219533       | Myelin P2 protein                                  | LGQFEETTADNRK       | c                        |
| IP100219533       | Myelin P2 protein                                  | LVSSNFDDYMK         | c; d                     |
| IP100219533       | Myelin P2 protein                                  | NTEISFK             | c                        |
| IP100219533       | Myelin P2 protein                                  | TESTFK              | c                        |
| IP100026237       | Myelin-associated glycoprotein precursor           | DGLHDLNVQCDWQKQG    | a                        |
| IP100026237       | Myelin-associated glycoprotein precursor           | DRQHGPVVELNR        | a                        |
| IP100026237       | Myelin-associated glycoprotein precursor           | DSYTLTEELAEVAEIR    | d                        |
| IP100026237       | Myelin-associated glycoprotein precursor           | LAASLAACAQLSALAASH  | a                        |
| IP100026237       | Myelin-associated glycoprotein precursor           | LCSHR               | a                        |
| IP100026237       | Myelin-associated glycoprotein precursor           | SGLVLTSILTLR        | a                        |
| IP100026237       | Myelin-associated glycoprotein precursor           | VVQATMVRDR          | a                        |
| IP100479469       | Myeloid typhoid or Mixed-lineage                   | GGAADVDRGLAAGDQLL   | a                        |
| IP100743335       | MYO1C variant protein                              | EPAYVR              | c; d                     |
| IP100005587       | Myomesin 2                                         | ASTQASSQKLSQR       | a                        |
| IP100005587       | Myomesin 2                                         | QQDVSIKLEAGK        | a                        |
| IP100014340       | Myosin binding subunit 85                          | CWLNGGAMPEARHPR     | a                        |
| IP100014340       | Myosin binding subunit 85                          | QWGARAGAEPPGERR     | a                        |
| IP100014340       | Myosin binding subunit 85                          | SASSSWLEGSTQAKEL    | a                        |
| IP100014340       | Myosin binding subunit 85                          | TGASALHVAALK        | a                        |
| IP100337335       | Myosin heavy chain                                 | DAEVERDEER          | a                        |
| IP100337335       | Myosin heavy chain                                 | LNRLDRSPR           | a                        |
| IP100337335       | Myosin heavy chain                                 | QDEVLQARAQELQK      | a                        |
| IP100337335       | Myosin heavy chain                                 | QLRRR               | a                        |
| IP100337335       | Myosin heavy chain                                 | VFRAMEAEAGLR        | a                        |
| IP100302328       | Myosin heavy chain, cardiac muscle alpha           | TTHPHFVRCIIPNER     | a                        |
| IP100025880       | Myosin heavy chain, cardiac muscle beta            | AKANLEK             | a                        |
| IP100025880       | Myosin heavy chain, cardiac muscle beta            | EMASMKKEEFTRLK      | a                        |
| IP100025880       | Myosin heavy chain, cardiac muscle beta            | IQAQRGVILAR         | a                        |
| IP100025880       | Myosin heavy chain, cardiac muscle beta            | SRNEALR             | a                        |
| IP100298301       | Myosin heavy chain, fast skeletal muscle,          | LEEAGGVISTQIENKRR   | a                        |
| IP100298301       | Myosin heavy chain, fast skeletal muscle,          | NALAHALQSSR         | a                        |
| IP100298301       | Myosin heavy chain, fast skeletal muscle,          | SRNEAIR             | a                        |
| IP100019502       | Myosin heavy chain, nonmuscle type A               | QVEDEK              | a                        |
| IP100019502       | Myosin heavy chain, nonmuscle type A               | TDLLEPVNRYR         | a                        |
| IP100397526       | Myosin heavy chain, nonmuscle type B               | ELACEVK             | a                        |
| IP100397526       | Myosin heavy chain, nonmuscle type B               | KDHNIPGELER         | a                        |
| IP100397526       | Myosin heavy chain, nonmuscle type B               | LQELGAVK            | a                        |
| IP100397526       | Myosin heavy chain, nonmuscle type B               | SRRRLHLEGASLELSD    | a                        |
| IP100007858       | Myosin heavy chain, skeletal muscle,               | DVGSQK              | a                        |
| IP1000025879      | Myosin heavy chain, skeletal muscle,               | EEVTSQK             | a                        |
| IP100007858       | Myosin heavy chain, skeletal muscle,               | KVIEKDEEIQLK        | a                        |
| IP100007858       | Myosin heavy chain, skeletal muscle,               | MSQESIMDLENEK       | a                        |
| IP100007858       | Myosin heavy chain, skeletal muscle,               | RHIELEK             | a                        |
| IP1000025879      | Myosin heavy chain, skeletal muscle,               | RNHIRIVESMQSTLDAEIR | a                        |
| IP100007858       | Myosin heavy chain, skeletal muscle,               | VIEKDEEIQLK         | a                        |
| IP100001753       | Myosin heavy chain, skeletal muscle, fetal         | ENQSILITGEGAGKTVN   | a                        |
| IP100001753       | Myosin heavy chain, skeletal muscle, fetal         | IEDEQALAMQLQK       | a                        |
| IP100001753       | Myosin heavy chain, skeletal muscle, fetal         | SELQTSLEEAASLEHEE   | a                        |
| IP100020501       | Myosin heavy chain, smooth muscle                  | HESMISELEVR         | a                        |
| IP100020501       | Myosin heavy chain, smooth muscle                  | KDTSITGELEK         | a                        |
| IP100020501       | Myosin heavy chain, smooth muscle                  | NKHESMISELEVR       | a                        |
| IP100020501       | Myosin heavy chain, smooth muscle                  | RQQLTAMK            | a                        |
| IP100020501       | Myosin heavy chain, smooth muscle                  | VLENADGSEETDTRDAD   | a                        |
| IP100329672       | Myosin Ie                                          | VLQVSIQGLPKNSRPTR   | a                        |
| IP100185036       | Myosin IIIA                                        | ALSDHPNVVR          | a                        |
| IP100185036       | Myosin IIIA                                        | GSVSVVK             | a                        |
| IP100185036       | Myosin IIIA                                        | RVSSQQCLSGVCKGEEP   | a                        |
| IP100220573       | Myosin regulatory light chain 2, nonsarcomeric     | GNFNVIEFTR          | e                        |
| IP100414037       | Myosin tail domain-containing protein              | ACNELDSTKQK         | a                        |
| IP100414037       | Myosin tail domain-containing protein              | ECVANHMR            | a                        |
| IP100414037       | Myosin tail domain-containing protein              | KDQSLR              | a                        |

| IPI Accession No. | Protein Description                                                                    | Peptide Sequence*               | Primary Source Dataset** |
|-------------------|----------------------------------------------------------------------------------------|---------------------------------|--------------------------|
| IP000414037       | Myosin tail domain-containing protein                                                  | LAEAHR                          | a                        |
| IP000414037       | Myosin tail domain-containing protein                                                  | LELHSEADK                       | a                        |
| IP000414037       | Myosin tail domain-containing protein                                                  | LITHEK                          | a                        |
| IP000414037       | Myosin tail domain-containing protein                                                  | LMDKISLVMECIPLSSK               | a                        |
| IP000414037       | Myosin tail domain-containing protein                                                  | SLEAKMELRR                      | a                        |
| IP000414037       | Myosin tail domain-containing protein                                                  | TLAAALSTVEEK                    | a                        |
| IP00016007        | Myosin Vc                                                                              | CEGFLEK                         | a                        |
| IP00016007        | Myosin Vc                                                                              | LRQSCVMYQKHMRR                  | a                        |
| IP00016007        | Myosin Vc                                                                              | QLFDDVQK                        | a                        |
| IP00016007        | Myosin Vc                                                                              | QSCVMYQK                        | a                        |
| IP00016007        | Myosin Vc                                                                              | RNVEEK                          | a                        |
| IP00016007        | Myosin Vc                                                                              | TISEFEK                         | a                        |
| IP000289258       | Myosin X                                                                               | DDLNLRL                         | a                        |
| IP000289258       | Myosin X                                                                               | GQIARR                          | a                        |
| IP000289258       | Myosin X                                                                               | KVLYCVVHIQK                     | a                        |
| IP000289258       | Myosin X                                                                               | QOELEALQK                       | a                        |
| IP000289258       | Myosin X                                                                               | WCVLKDETLWFR                    | a                        |
| IP000296948       | Myosin XV                                                                              | AQPRAR                          | a                        |
| IP000296948       | Myosin XV                                                                              | AVVSTAR                         | a                        |
| IP000296948       | Myosin XV                                                                              | DHFYLPVSR                       | a                        |
| IP000296948       | Myosin XV                                                                              | GSQKARAGGPAVR                   | a                        |
| IP000296948       | Myosin XV                                                                              | ISEDRLR                         | a                        |
| IP000296948       | Myosin XV                                                                              | LTLPSPSEITLL                    | a                        |
| IP000296948       | Myosin XV                                                                              | NKMHSIRNLPMSR                   | a                        |
| IP000296948       | Myosin XV                                                                              | RQAAPGR                         | a                        |
| IP000296948       | Myosin XV                                                                              | SSSRMGSR                        | a                        |
| IP000296948       | Myosin XV                                                                              | TGPFQPFPPPAR                    | a                        |
| IP00025879        | Myosin-1                                                                               | ANLLQAEIEELR                    | c                        |
| IP000397526       | Myosin-10                                                                              | DAASLESQIQDTQELLQEEETR          | e                        |
| IP000397526       | Myosin-10                                                                              | ELDDATEANEGLSR                  | e                        |
| IP000397526       | Myosin-10                                                                              | NSLQEQEQEEEAR                   | e                        |
| IP000397526       | Myosin-10                                                                              | SLEAEILQOEELASSER               | d                        |
| IP000454910       | Myotonic dystrophy kinase-related                                                      | ELEAQVSSLSR                     | a                        |
| IP000454910       | Myotonic dystrophy kinase-related                                                      | LRGGLDDFR                       | a                        |
| IP000454910       | Myotonic dystrophy kinase-related                                                      | LQEAQEREAAATASQTR               | a                        |
| IP000454910       | Myotonic dystrophy kinase-related                                                      | RGWQRVFAALSDSR                  | a                        |
| IP000179589       | Myotrophin                                                                             | EFMWALK                         | d                        |
| IP000179589       | Myotrophin                                                                             | GPDGLTAFEATDNQAIK               | d                        |
| IP000179589       | Myotrophin                                                                             | TLEGGRR                         | c                        |
| IP000743642       | MYRIP protein                                                                          | EPSSPSAQLR                      | d                        |
| IP000219301       | Myristoylated alanine-rich C-kinase substrate                                          | AEDGATPSPNETPK                  | c; d; h                  |
| IP000219301       | Myristoylated alanine-rich C-kinase substrate                                          | EAGEGGEAEAPAAEGGK               | c; d; e                  |
| IP000219301       | Myristoylated alanine-rich C-kinase substrate                                          | EELQANGSAPADKKEPAAAGSGAASPSAAEK | c; d; e                  |
| IP000219301       | Myristoylated alanine-rich C-kinase substrate                                          | GEAAARPGEAAVASSPSK              | c; d; h                  |
| IP000219301       | Myristoylated alanine-rich C-kinase substrate                                          | LSGFSFK                         | d                        |
| IP000414042       | N-acetylgalactosaminyltransferase                                                      | EGLLAPFSKRNSTASFPG              | a                        |
| IP000414042       | N-acetylgalactosaminyltransferase                                                      | GPRPRPAGDSR                     | a                        |
| IP000414042       | N-acetylgalactosaminyltransferase                                                      | LSHMETHNK                       | a                        |
| IP000065312       | N-acetylgalactosaminyltransferase                                                      | LTHMETDNK                       | a                        |
| IP000414042       | N-acetylgalactosaminyltransferase                                                      | SRGRYQLQR                       | a                        |
| IP000414042       | N-acetylgalactosaminyltransferase                                                      | TSHIPVQPEKR                     | a                        |
| IP000065312       | N-acetylgalactosaminyltransferase                                                      | YGGMTEEFR                       | a                        |
| IP000065312       | N-acetylgalactosaminyltransferase                                                      | WREDAIDWQR                      | a                        |
| IP00009997        | N-acetyllactosaminide                                                                  | EPGEFALLR                       | a                        |
| IP00009997        | N-acetyllactosaminide                                                                  | QYGFNR                          | a                        |
| IP00009997        | N-acetyllactosaminide                                                                  | SDVQVK                          | a                        |
| IP00009997        | N-acetyllactosaminide                                                                  | TALASGGVLDASGDYRV               | a                        |
| IP00103487        | NACHT-, LRR- and PYD-containing                                                        | DLQLLAQQPIYVR                   | a                        |
| IP00103487        | NACHT-, LRR- and PYD-containing                                                        | STCHLQKVEIK                     | a                        |
| IP000337541       | NAD(P) transhydrogenase, mitochondrial precursor                                       | MIDMEK                          | d; e                     |
| IP000515016       | NAD(P)H dehydrogenase, quinone 2                                                       | NLAPQISFAPELASEEER              | d                        |
| IP000419266       | NADH dehydrogenase (ubiquinone) 1 alpha subcomplex, 6, 14kDa                           | VVDLLVIK                        | d                        |
| IP000642807       | NADH dehydrogenase (Ubiquinone) 1 beta subcomplex 8, 19kDa                             | DMFFGYPYR                       | e                        |
| IP000642807       | NADH dehydrogenase (Ubiquinone) 1 beta subcomplex 8, 19kDa                             | DPWYSWDQPLGR                    | e                        |
| IP000642807       | NADH dehydrogenase (Ubiquinone) 1 beta subcomplex 8, 19kDa                             | GGDPSKEPER                      | c                        |
| IP000642807       | NADH dehydrogenase (Ubiquinone) 1 beta subcomplex 8, 19kDa                             | QYPYNNLYLER                     | e                        |
| IP000025725       | NADH dehydrogenase (ubiquinone) 1 beta subcomplex, 1, 7kDa                             | ELQPSSEVTWK                     | e                        |
| IP000375914       | NADH dehydrogenase (ubiquinone) 1 beta subcomplex, 6, 17kDa isoform 2                  | DQELSPR                         | e                        |
| IP000375914       | NADH dehydrogenase (ubiquinone) 1 beta subcomplex, 6, 17kDa isoform 2                  | EFFDQHH                         | e                        |
| IP000029561       | NADH dehydrogenase [ubiquinone] 1 alpha subcomplex subunit 10, mitochondrial precursor | WIWLK                           | d                        |
| IP000029561       | NADH dehydrogenase [ubiquinone] 1 alpha subcomplex subunit 10, mitochondrial precursor | YGMVHFLIGDK                     | d                        |
| IP000219381       | NADH dehydrogenase [ubiquinone] 1 alpha subcomplex subunit 2                           | SPGSGQVR                        | e                        |
| IP000219381       | NADH dehydrogenase [ubiquinone] 1 alpha subcomplex subunit 2                           | YAFGQETNVPLNNSADQVTR            | d; e                     |
| IP000011770       | NADH dehydrogenase [ubiquinone] 1 alpha subcomplex subunit 4                           | FYSVNDVYSK                      | d; e                     |
| IP000011770       | NADH dehydrogenase [ubiquinone] 1 alpha subcomplex subunit 4                           | LGPNQYK                         | d                        |
| IP000011770       | NADH dehydrogenase [ubiquinone] 1 alpha subcomplex subunit 4                           | QIQQAK                          | d                        |
| IP000554681       | NADH dehydrogenase [ubiquinone] 1 alpha subcomplex subunit 5                           | AEPDVK                          | e                        |
| IP000554681       | NADH dehydrogenase [ubiquinone] 1 alpha subcomplex subunit 5                           | ILDVLEEPK                       | d; e                     |
| IP000554681       | NADH dehydrogenase [ubiquinone] 1 alpha subcomplex subunit 5                           | LWEPLVEEPPADQWK                 | e                        |
| IP000452731       | NADH dehydrogenase [ubiquinone] 1 alpha subcomplex subunit 7                           | WELSSDQPYL                      | e                        |
| IP000219034       | NADH dehydrogenase [ubiquinone] 1 alpha subcomplex subunit 8                           | CALDFR                          | e                        |
| IP000219034       | NADH dehydrogenase [ubiquinone] 1 alpha subcomplex subunit 8                           | EFMLCR                          | b; e                     |
| IP000219034       | NADH dehydrogenase [ubiquinone] 1 alpha subcomplex subunit 8                           | FYFWTK                          | d; e                     |
| IP00003968        | NADH dehydrogenase [ubiquinone] 1 alpha subcomplex subunit 9, mitochondrial precursor  | DAPFPAIIVKPSDFGR                | e                        |
| IP00003968        | NADH dehydrogenase [ubiquinone] 1 alpha subcomplex subunit 9, mitochondrial precursor  | NFDPEVDFVK                      | d; e                     |
| IP00003968        | NADH dehydrogenase [ubiquinone] 1 alpha subcomplex subunit 9, mitochondrial precursor  | VFEISPFEPWITR                   | d; e                     |
| IP00003968        | NADH dehydrogenase [ubiquinone] 1 alpha subcomplex subunit 9, mitochondrial precursor  | YVNVHLGR                        | d                        |
| IP000479905       | NADH dehydrogenase [ubiquinone] 1 beta subcomplex subunit 10                           | AFDLIVDRPVTLVR                  | e                        |
| IP000479905       | NADH dehydrogenase [ubiquinone] 1 beta subcomplex subunit 10                           | EVEQFTQVAK                      | d; e                     |
| IP000479905       | NADH dehydrogenase [ubiquinone] 1 beta subcomplex subunit 10                           | YQDLGAYSSAR                     | d; e                     |
| IP000220059       | NADH dehydrogenase [ubiquinone] 1 beta subcomplex subunit 4                            | EYLLQYNDPNRR                    | e                        |
| IP000220059       | NADH dehydrogenase [ubiquinone] 1 beta subcomplex subunit 4                            | GLIENPALLR                      | d                        |
| IP000220059       | NADH dehydrogenase [ubiquinone] 1 beta subcomplex subunit 4                            | TINVVNFRPTPK                    | e                        |
| IP000220059       | NADH dehydrogenase [ubiquinone] 1 beta subcomplex subunit 4                            | TLPETLPAEYNSIPETR               | d; e                     |
| IP000219772       | NADH dehydrogenase [ubiquinone] 1 beta subcomplex subunit 7                            | DSFPFLACK                       | e                        |
| IP000255052       | NADH dehydrogenase [ubiquinone] 1 beta subcomplex subunit 9                            | AMYPDYFAK                       | e                        |
| IP000255052       | NADH dehydrogenase [ubiquinone] 1 beta subcomplex subunit 9                            | EAEFFWYR                        | d; e                     |

| IPI Accession No. | Protein Description                                                      | Peptide Sequence*      | Primary Source Dataset** |
|-------------------|--------------------------------------------------------------------------|------------------------|--------------------------|
| IP10025502        | NADH dehydrogenase [ubiquinone] 1 beta subcomplex subunit 9              | QHQPQYIFPDSGGTSYER     | e                        |
| IP10025502        | NADH dehydrogenase [ubiquinone] 1 beta subcomplex subunit 9              | QLQETTPPGGLTEALPPAR    | d; e                     |
| IP10025502        | NADH dehydrogenase [ubiquinone] 1 beta subcomplex subunit 9              | YFACLMR                | b; e                     |
| IP100103509       | NADH dehydrogenase ubiquinone 1 alpha subcomplex                         | ITSAYLQDIENAYK         | d                        |
| IP100103509       | NADH dehydrogenase ubiquinone 1 alpha subcomplex                         | VVEDEIYK               | d; e                     |
| IP100025344       | NADH-ubiquinone oxidoreductase 13 kDa-A subunit, mitochondrial precursor | EVNENFAIDLIAEQPVSEVETR | d; e                     |
| IP100220063       | NADH-ubiquinone oxidoreductase 15 kDa subunit                            | EWIECAHIGGYTR          | e                        |
| IP100220063       | NADH-ubiquinone oxidoreductase 15 kDa subunit                            | IEYDDFVECLLR           | d                        |
| IP100010845       | NADH-ubiquinone oxidoreductase 23 kDa subunit, mitochondrial precursor   | EPATINYFEK             | e                        |
| IP100010845       | NADH-ubiquinone oxidoreductase 23 kDa subunit, mitochondrial precursor   | GLGMILSYLFR            | d                        |
| IP100010845       | NADH-ubiquinone oxidoreductase 23 kDa subunit, mitochondrial precursor   | TLWTELFR               | d; e                     |
| IP100025796       | NADH-ubiquinone oxidoreductase 30 kDa subunit, mitochondrial precursor   | DFPLSGVVELR            | e                        |
| IP100025796       | NADH-ubiquinone oxidoreductase 30 kDa subunit, mitochondrial precursor   | FDLNSPWEAFVYR          | e                        |
| IP100025796       | NADH-ubiquinone oxidoreductase 30 kDa subunit, mitochondrial precursor   | FEIVNLSLR              | d; e                     |
| IP100025796       | NADH-ubiquinone oxidoreductase 30 kDa subunit, mitochondrial precursor   | ILTDYGFEGHPR           | d; e                     |
| IP100025796       | NADH-ubiquinone oxidoreductase 30 kDa subunit, mitochondrial precursor   | KFDLNSPWEAFVYR         | d                        |
| IP100025796       | NADH-ubiquinone oxidoreductase 30 kDa subunit, mitochondrial precursor   | QLSAFGEYVAELPK         | e                        |
| IP100025796       | NADH-ubiquinone oxidoreductase 30 kDa subunit, mitochondrial precursor   | SLVDLTAVDVPTTR         | d; e                     |
| IP100025796       | NADH-ubiquinone oxidoreductase 30 kDa subunit, mitochondrial precursor   | VVAEPVELAQEFR          | d; e                     |
| IP100025239       | NADH-ubiquinone oxidoreductase 49 kDa subunit, mitochondrial precursor   | LDELEELLTNNR           | d; e                     |
| IP100025239       | NADH-ubiquinone oxidoreductase 49 kDa subunit, mitochondrial precursor   | LYMELSGEIVR            | e                        |
| IP100025239       | NADH-ubiquinone oxidoreductase 49 kDa subunit, mitochondrial precursor   | MFEFVYR                | e                        |
| IP100025239       | NADH-ubiquinone oxidoreductase 49 kDa subunit, mitochondrial precursor   | TQPYDYDQVEFDVPGSR      | d; e                     |
| IP100025239       | NADH-ubiquinone oxidoreductase 49 kDa subunit, mitochondrial precursor   | TYLQALPYFDR            | d; e                     |
| IP100604664       | NADH-ubiquinone oxidoreductase 75 kDa subunit, mitochondrial precursor   | ALSEAGMILPYDILDQVR     | d; e                     |
| IP100604664       | NADH-ubiquinone oxidoreductase 75 kDa subunit, mitochondrial precursor   | AVTEGAQVEEPSIC         | e                        |
| IP100604664       | NADH-ubiquinone oxidoreductase 75 kDa subunit, mitochondrial precursor   | DFYMTDSISR             | e                        |
| IP100604664       | NADH-ubiquinone oxidoreductase 75 kDa subunit, mitochondrial precursor   | FASELAGVDDLGTGR        | d; e                     |
| IP100604664       | NADH-ubiquinone oxidoreductase 75 kDa subunit, mitochondrial precursor   | FAYDGLK                | d                        |
| IP100604664       | NADH-ubiquinone oxidoreductase 75 kDa subunit, mitochondrial precursor   | FEAPLGNAR              | c; e                     |
| IP100604664       | NADH-ubiquinone oxidoreductase 75 kDa subunit, mitochondrial precursor   | GLLTYSWEDALSR          | e                        |
| IP100604664       | NADH-ubiquinone oxidoreductase 75 kDa subunit, mitochondrial precursor   | IASQVAALDLGKYPGVEAIR   | d; e                     |
| IP100604664       | NADH-ubiquinone oxidoreductase 75 kDa subunit, mitochondrial precursor   | SATVYNTGFR             | d                        |
| IP100604664       | NADH-ubiquinone oxidoreductase 75 kDa subunit, mitochondrial precursor   | VAVTPPGLAR             | d                        |
| IP100604664       | NADH-ubiquinone oxidoreductase 75 kDa subunit, mitochondrial precursor   | VSDTLCTEEVFTAGAGTDLR   | d; e                     |
| IP100008214       | NADH-ubiquinone oxidoreductase 9 kDa subunit, mitochondrial precursor    | MPQPSSGR               | e                        |
| IP100029558       | NADH-ubiquinone oxidoreductase subunit B14.5b                            | TYGEIFEK               | d; e                     |
| IP100008215       | NADP-dependent malic enzyme                                              | DAYQEK                 | a                        |
| IP100008215       | NADP-dependent malic enzyme                                              | EPEAFR                 | a                        |
| IP100008215       | NADP-dependent malic enzyme                                              | GLFITHDR               | d                        |
| IP100008215       | NADP-dependent malic enzyme                                              | ILGLDGLCGNMGIPVGK      | a                        |
| IP100003970       | NADP-dependent malic enzyme, mitochondrial precursor                     | EAFVR                  | c; d                     |
| IP100064767       | Nadrin                                                                   | EEGLFR                 | a                        |
| IP100064767       | Nadrin                                                                   | IDTLK                  | a                        |
| IP100064767       | Nadrin                                                                   | KALAVLEK               | a                        |
| IP100064767       | Nadrin                                                                   | KQLARLVLDWDSVR         | a                        |
| IP100064767       | Nadrin                                                                   | QFNRMKQLANQTVGR        | a                        |
| IP100748905       | NAPB protein                                                             | EFDSISR                | d; e                     |
| IP100748905       | NAPB protein                                                             | VAAVAAQLEQYQK          | d                        |
| IP100748905       | NAPB protein                                                             | YEEMFFAFTDSR           | d; e                     |
| IP100017619       | Nasopharyngeal epithelium specific                                       | EHALAVQVHGTGMSSR       | a                        |
| IP100017619       | Nasopharyngeal epithelium specific                                       | GAGASKR                | a                        |
| IP100479634       | Nasopharyngeal epithelium specific                                       | IDEEK                  | a                        |
| IP100479634       | Nasopharyngeal epithelium specific                                       | DIPAMLPAAR             | a                        |
| IP100329688       | Natural killer cell-specific antigen KLIP1                               | MATTAAPAGGAR           | a                        |
| IP100329688       | Natural killer cell-specific antigen KLIP1                               | IIFFPGFK               | a                        |
| IP100218081       | NCAG1                                                                    | SLSDALISLQMVYPR        | d; e                     |
| IP100409684       | NCK-associated protein 1 isoform 2                                       | YHEDFEK                | c                        |
| IP100303335       | Nebulin                                                                  | AGDALNEK               | a                        |
| IP100303335       | Nebulin                                                                  | AGDALNER               | d                        |
| IP100303335       | Nebulin                                                                  | ANAINISDK              | a                        |
| IP100303335       | Nebulin                                                                  | DDPKMMWISHVARIQSD      | a                        |
| IP100303335       | Nebulin                                                                  | DLEESIRGK              | a                        |
| IP100303335       | Nebulin                                                                  | GIGWVPIDSLVVR          | a                        |
| IP100303335       | Nebulin                                                                  | KAGDALNEK              | a                        |
| IP100303335       | Nebulin                                                                  | MGYEELK                | a                        |
| IP100303335       | Nebulin                                                                  | QKGHYVGTLTAR           | a                        |
| IP100303335       | Nebulin                                                                  | QNAHTMNK               | a                        |
| IP100303335       | Nebulin                                                                  | SQEVATNANYR            | a                        |
| IP100303335       | Nebulin                                                                  | VNQITMSDK              | a                        |
| IP100303335       | Nebulin                                                                  | VTDQISDIYVK            | a                        |
| IP100303335       | Nebulin                                                                  | YKQSAEMEK              | a                        |
| IP100303335       | Nebulin                                                                  | AGQLYSEKNYR            | a                        |
| IP100398162       | Nebulin-related anchoring protein                                        | DANYRQSIDK             | a                        |
| IP100398162       | Nebulin-related anchoring protein                                        | GHDERSIRSFSTVVDTPFL    | a                        |
| IP100398162       | Nebulin-related anchoring protein                                        | HEYTMTLGLPEFIR         | a                        |
| IP100398162       | Nebulin-related anchoring protein                                        | SVDDDRMKHFLNVGR        | a                        |
| IP100398162       | Nebulin-related anchoring protein                                        | TRFHLPMDMVNIR          | a                        |
| IP100005667       | Nedd4-binding protein 1                                                  | SACEK                  | a                        |
| IP100020008       | NEDD8 precursor                                                          | EGHPPQQQR              | d; e                     |
| IP100020008       | NEDD8 precursor                                                          | EIEIDIEPTDKVER         | c; d                     |
| IP100020008       | NEDD8 precursor                                                          | QMNDK                  | d                        |
| IP100020008       | NEDD8 precursor                                                          | DQAGEYECSAENDVSPDVR    | e                        |
| IP100645710       | NEGR1 protein                                                            | VYVNFAPTIQEK           | e                        |
| IP100645710       | NEGR1 protein                                                            | IYEDSLGRMIFR           | e                        |
| IP100337657       | Nephrocystin 3                                                           | NQELLSMGR              | a                        |
| IP100337657       | Nephrocystin 3                                                           | GSMAGSTGVHDTVYVNL      | a                        |
| IP100006451       | N-ethylmaleimide-sensitive factor                                        | LFGLLVK                | a; d; e                  |
| IP100006451       | N-ethylmaleimide-sensitive factor                                        | QSHNPVWNEK             | a; e                     |
| IP100006451       | N-ethylmaleimide-sensitive factor                                        | TTIAQQVK               | a; d; e                  |
| IP100006451       | N-ethylmaleimide-sensitive factor                                        | WGDVPTTR               | a                        |
| IP100420053       | N-ethylmaleimide-sensitive factor attachment protein, alpha              | AIHYEQSADYK            | d                        |
| IP100420053       | N-ethylmaleimide-sensitive factor attachment protein, alpha              | EAEAMALLAEAR           | e                        |
| IP100420053       | N-ethylmaleimide-sensitive factor attachment protein, alpha              | IEACEIYAR              | e                        |
| IP100420053       | N-ethylmaleimide-sensitive factor attachment protein, alpha              | YEELPFAFSDSR           | d; e                     |
| IP100435020       | Neural cell adhesion molecule 1, 140 kDa                                 | FFLCQVAGDAK            | a; b; c; d; e            |
| IP100435020       | Neural cell adhesion molecule 1, 140 kDa isoform precursor               | DESKETPEYVR            | d                        |



| IPI Accession No. | Protein Description                                            | Peptide Sequence*      | Primary Source Dataset** |
|-------------------|----------------------------------------------------------------|------------------------|--------------------------|
| IP100435020       | Neural cell adhesion molecule 1, 140 kDa isoform precursor     | EASMEGIVITVGLKPEITYAVR | d                        |
| IP100435020       | Neural cell adhesion molecule 1, 140 kDa isoform precursor     | FIVLSNNYLQIR           | d; e                     |
| IP100435020       | Neural cell adhesion molecule 1, 140 kDa isoform precursor     | GLGEISAASEFK           | c; e                     |
| IP100435020       | Neural cell adhesion molecule 1, 140 kDa isoform precursor     | GPVEAKPEQCETETKPAAEVK  | b; d                     |
| IP100435020       | Neural cell adhesion molecule 1, 140 kDa isoform precursor     | LEGQMGEDGNSIK          | c; d; e                  |
| IP100435020       | Neural cell adhesion molecule 1, 140 kDa isoform precursor     | QDDGGSPIR              | a; c; d; e               |
| IP100435020       | Neural cell adhesion molecule 1, 140 kDa isoform precursor     | TVPNDAITQTK            | d                        |
| IP100442038       | Neural interleukin 16 protein                                  | DPGVSESPPPGR           | a                        |
| IP100442038       | Neural interleukin 16 protein                                  | EPRQAVIVTR             | a                        |
| IP100442038       | Neural interleukin 16 protein                                  | KPMSSKPKPPPRK          | a                        |
| IP100442038       | Neural interleukin 16 protein                                  | SAAPTDR                | a                        |
| IP100442038       | Neural interleukin 16 protein                                  | SLKGTTHHDALAILRQAR     | a                        |
| IP100442038       | Neural interleukin 16 protein                                  | TIFAGGAAAADGR          | a                        |
| IP100011676       | Neural Wiskott-Aldrich syndrome protein                        | QAPPPPPSR              | d                        |
| IP100290085       | Neural-cadherin precursor                                      | GPFPQLVLR              | a                        |
| IP100290085       | Neural-cadherin precursor                                      | MCRIAGALR              | a                        |
| IP100290085       | Neural-cadherin precursor                                      | WQVAVK                 | a                        |
| IP100442299       | Neurexin 1-alpha precursor                                     | DCSQEDNNVEGLAHLMM      | a                        |
| IP100442299       | Neurexin 1-alpha precursor                                     | MGTALLQR               | a                        |
| IP100442299       | Neurexin 1-alpha precursor                                     | NGDDIVCELNAR           | a                        |
| IP100442299       | Neurexin 1-alpha precursor                                     | QGDPK                  | a                        |
| IP100048230       | Neurexophilin 1 precursor                                      | YDTPEPSEQDLWDWLR       | a                        |
| IP100470625       | Neuritin precursor                                             | GFSDCLLK               | e                        |
| IP100021812       | Neuroblast differentiation associated                          | FKMPDMHFKAPK           | a                        |
| IP100021812       | Neuroblast differentiation associated                          | GDLDASVSMK             | a                        |
| IP100021812       | Neuroblast differentiation associated                          | GPVKVKGDMDVSVPK        | a                        |
| IP100021812       | Neuroblast differentiation associated                          | LNVGAPDVTLR            | a                        |
| IP100021812       | Neuroblast differentiation associated                          | MPEINIK                | a                        |
| IP100021812       | Neuroblast differentiation-associated protein AHNAK (Fragment) | AKAPK                  | c                        |
| IP100013299       | Neuroblastoma suppressor of                                    | LALFPDK                | a                        |
| IP100395510       | Neurocalcin delta                                              | AEMLEIVQAIYK           | d                        |
| IP100395510       | Neurocalcin delta                                              | IYGNFFPYGDASK          | d                        |
| IP100395510       | Neurocalcin delta                                              | LLQCDPSSAGQF           | e                        |
| IP100159927       | Neurocan core protein precursor                                | APVLELEK               | a                        |
| IP100159927       | Neurocan core protein precursor                                | AWEDAIEK               | a; d                     |
| IP100159927       | Neurocan core protein precursor                                | AWEDAIEKDCRR           | a                        |
| IP100159927       | Neurocan core protein precursor                                | ELGGEVFVYVGPFR         | d; e                     |
| IP100159927       | Neurocan core protein precursor                                | GTVLGCVPPAVENASLIG     | a                        |
| IP100159927       | Neurocan core protein precursor                                | RCGGPAPGVR             | a                        |
| IP100159927       | Neurocan core protein precursor                                | VSLPSYPRR              | a                        |
| IP100555661       | Neurochondrin isoform 2                                        | EAEPLLAVLR             | d; e                     |
| IP100555661       | Neurochondrin isoform 2                                        | EAPDGCDDHIVLR          | c                        |
| IP100555661       | Neurochondrin isoform 2                                        | EVCQLLPVLR             | d                        |
| IP100555661       | Neurochondrin isoform 2                                        | GDPDDAAR               | d; e                     |
| IP100555661       | Neurochondrin isoform 2                                        | GLSEDFQK               | c                        |
| IP100555661       | Neurochondrin isoform 2                                        | IFDAVGTTPNR            | c; d; e                  |
| IP100555661       | Neurochondrin isoform 2                                        | ILGAWLAETSSLR          | d                        |
| IP100555661       | Neurochondrin isoform 2                                        | LQAGEETASHYR           | d                        |
| IP100555661       | Neurochondrin isoform 2                                        | SMIDDTYQCLTAVAGTPR     | d; e                     |
| IP100555661       | Neurochondrin isoform 2                                        | YLGALR                 | d                        |
| IP100217507       | Neurofilament 3 (150kDa medium)                                | DDTEAAIR               | a                        |
| IP100217507       | Neurofilament 3 (150kDa medium)                                | YAKLTEAAEQNK           | a                        |
| IP100021751       | Neurofilament triplet H protein                                | DSLERQRSELEDR          | a                        |
| IP100021751       | Neurofilament triplet H protein                                | DTKEEK                 | c                        |
| IP100021751       | Neurofilament triplet H protein                                | EAAPEK                 | c                        |
| IP100021751       | Neurofilament triplet H protein                                | EAPARVEVK              | a                        |
| IP100021751       | Neurofilament triplet H protein                                | FAQEAEAR               | d; e                     |
| IP100021751       | Neurofilament triplet H protein                                | HQADIASYQEAIQQLDAELR   | d                        |
| IP100021751       | Neurofilament triplet H protein                                | KAEEEK                 | c                        |
| IP100021751       | Neurofilament triplet H protein                                | KGGAGGTRSAAGSSSGF      | a                        |
| IP100021751       | Neurofilament triplet H protein                                | SPADKPEK               | c                        |
| IP100021751       | Neurofilament triplet H protein                                | VKEPPK                 | c                        |
| IP100217507       | Neurofilament triplet M protein                                | ATAPEVK                | c                        |
| IP100217507       | Neurofilament triplet M protein                                | EAAEKEEEEEPEEEEEVAAK   | c                        |
| IP100217507       | Neurofilament triplet M protein                                | EAPKEEK                | c; d                     |
| IP100217507       | Neurofilament triplet M protein                                | EEGKPLQVEK             | c; d                     |
| IP100217507       | Neurofilament triplet M protein                                | EELAEYR                | d; e                     |
| IP100217507       | Neurofilament triplet M protein                                | EELVADAK               | c; d                     |
| IP100217507       | Neurofilament triplet M protein                                | EIEAEIQALR             | d; e                     |
| IP100217507       | Neurofilament triplet M protein                                | ETKEEGKPLQVEK          | c                        |
| IP100217507       | Neurofilament triplet M protein                                | FAGYIEK                | d; e                     |
| IP100217507       | Neurofilament triplet M protein                                | FEEEAR                 | e                        |
| IP100217507       | Neurofilament triplet M protein                                | FVEEHEETK              | d                        |
| IP100217507       | Neurofilament triplet M protein                                | GEQKEEEK               | c; d                     |
| IP100217507       | Neurofilament triplet M protein                                | GSPSTVSSSYK            | c                        |
| IP100217507       | Neurofilament triplet M protein                                | ITSEGGDGATK            | c; d                     |
| IP100217507       | Neurofilament triplet M protein                                | LRDDTEAAIR             | c                        |
| IP100217507       | Neurofilament triplet M protein                                | LTEAAEQNK              | d                        |
| IP100217507       | Neurofilament triplet M protein                                | QASHAQLGDAYDQIEIR      | d; e                     |
| IP100217507       | Neurofilament triplet M protein                                | SDQAEEGGSEK            | d                        |
| IP100217507       | Neurofilament triplet M protein                                | SPVEEK                 | c                        |
| IP100217507       | Neurofilament triplet M protein                                | VEAPK                  | c                        |
| IP100217507       | Neurofilament triplet M protein                                | VEEHEETEEK             | c; d                     |
| IP100217507       | Neurofilament triplet M protein                                | VELDKK                 | c                        |
| IP100217507       | Neurofilament triplet M protein                                | VQSLQDEVAFLR           | d                        |
| IP100237671       | neurofilament, light polypeptide 68kDa                         | ALYEQIEIR              | c; e                     |
| IP100237671       | neurofilament, light polypeptide 68kDa                         | AQLQLNDR               | e                        |
| IP100237671       | neurofilament, light polypeptide 68kDa                         | EAEEEK                 | c; d                     |
| IP100237671       | neurofilament, light polypeptide 68kDa                         | EEEGGEGEGEETK          | d                        |
| IP100237671       | neurofilament, light polypeptide 68kDa                         | EYQDLLNVK              | c; d; e                  |
| IP100237671       | neurofilament, light polypeptide 68kDa                         | FASFIER                | c; d; e                  |
| IP100237671       | neurofilament, light polypeptide 68kDa                         | FTVLTESAALK            | e                        |
| IP100237671       | neurofilament, light polypeptide 68kDa                         | IDSIMDEISFLK           | d; e                     |
| IP100237671       | neurofilament, light polypeptide 68kDa                         | KVEGAGEEQAAK           | c; d                     |
| IP100237671       | neurofilament, light polypeptide 68kDa                         | LSFTSVGSITSGYSQSSQVFGR | d                        |
| IP100237671       | neurofilament, light polypeptide 68kDa                         | MALDIEIAAYR            | d                        |
| IP100237671       | neurofilament, light polypeptide 68kDa                         | NMQNAEEWFK             | e                        |

| IPI Accession No. | Protein Description                                                | Peptide Sequence*          | Primary Source Dataset** |
|-------------------|--------------------------------------------------------------------|----------------------------|--------------------------|
| IP100237671       | neurofilament, light polypeptide 68kDa                             | SAYGGLQTSYLMSTR            | e                        |
| IP100237671       | neurofilament, light polypeptide 68kDa                             | SAYSSYAPVSSLSVR            | d; e                     |
| IP100237671       | neurofilament, light polypeptide 68kDa                             | VEGAGEQAAK                 | e                        |
| IP100237671       | neurofilament, light polypeptide 68kDa                             | VHELEQNK                   | e                        |
| IP100237671       | neurofilament, light polypeptide 68kDa                             | VLEAELLVLR                 | d; e                     |
| IP100237671       | neurofilament, light polypeptide 68kDa                             | YEEVLSR                    | e                        |
| IP100022640       | Neurogranin                                                        | GPGPGGGGAGVAR              | d; e                     |
| IP100022640       | Neurogranin                                                        | KGPGPGGGGAGVAR             | c; d                     |
| IP100176424       | Neuroigin-2 precursor                                              | FQPPEAPASWGVGR             | a                        |
| IP100176424       | Neuroigin-2 precursor                                              | ELVDQDVQPAR                | e                        |
| IP100176424       | Neuroigin-2 precursor                                              | FPVNTAYGR                  | e                        |
| IP100015964       | Neuromodulin                                                       | AEDAPAKEEPK                | c; d                     |
| IP100015964       | Neuromodulin                                                       | AGETPSEK                   | c; d; e; h               |
| IP100015964       | Neuromodulin                                                       | AGSAETESATK                | c; d; e                  |
| IP100015964       | Neuromodulin                                                       | ASTDNSPSSK                 | c; h                     |
| IP100015964       | Neuromodulin                                                       | ATAQPPTETGESSQAENEAVDETKPK | c; d                     |
| IP100015964       | Neuromodulin                                                       | DEAPVADGVEK                | c; d; e                  |
| IP100015964       | Neuromodulin                                                       | EEPEADQEHHA                | d                        |
| IP100015964       | Neuromodulin                                                       | GEGTTTAAEAPATGSKPDEPGK     | c; d                     |
| IP100015964       | Neuromodulin                                                       | GHTR                       | c                        |
| IP100015964       | Neuromodulin                                                       | IQASFR                     | d                        |
| IP100015964       | Neuromodulin                                                       | KDEAPVADGVEK               | d                        |
| IP100015964       | Neuromodulin                                                       | KGEGDAATEQAAPQAPASSEK      | c; d; e; h               |
| IP100015964       | Neuromodulin                                                       | KGEGTTTAAEAPATGSKPDEPGK    | c; d                     |
| IP100015964       | Neuromodulin                                                       | NDDDQKIEQDGKPEDK           | d                        |
| IP100015964       | Neuromodulin                                                       | QADVPAATAAATTPAAEDAAK      | c; d; e; h               |
| IP100015964       | Neuromodulin                                                       | QDEGKEEPEADQEHHA           | c; d                     |
| IP100478767       | Neuron navigator 1                                                 | ETMHNMQLEVLLK              | a                        |
| IP100478767       | Neuron navigator 1                                                 | EVSELRSLEWEK               | a                        |
| IP100478767       | Neuron navigator 1                                                 | RTVQNVLDLR                 | a                        |
| IP100478767       | Neuron navigator 1                                                 | SLTNLSFLTDEK               | a                        |
| IP100478767       | Neuron navigator 1                                                 | SSMSVVTGGR                 | a                        |
| IP100478767       | Neuron navigator 1                                                 | SVSSLNRRSLPSRWYG           | a                        |
| IP100478767       | Neuron navigator 1                                                 | VFKSGVDSR                  | a                        |
| IP100478767       | Neuron navigator 1                                                 | VLDAEPPMPPCRR              | a                        |
| IP100002334       | Neuron specific protein family member 1                            | SVSPWMSVLSSEK              | a                        |
| IP100219110       | Neuronal calcium sensor 1                                          | ADPSIVQALSVDGLV            | e                        |
| IP100019952       | Neuronal membrane glycoprotein M6-a                                | LNAYT                      | e                        |
| IP100031289       | Neuronal pentraxin receptor                                        | LEELPAR                    | a                        |
| IP100334238       | NeuroNal peNraxiN receptor isoform 1                               | LVEAFGGATK                 | a                        |
| IP100334238       | NeuroNal peNraxiN receptor isoform 1                               | MDQEQQLLAQVLALEK           | a                        |
| IP100334238       | NeuroNal peNraxiN receptor isoform 1                               | QRQEVKELDVLQGR             | a                        |
| IP100220562       | Neuronal pentraxin-1 precursor                                     | CESQSLDPGAGEAR             | e                        |
| IP100164159       | Neuronal potassium channel alpha                                   | IVQVLR                     | a                        |
| IP100005981       | Neuronal protein NP25                                              | DMAAVQR                    | d                        |
| IP100005981       | Neuronal protein NP25                                              | GEPWFHR                    | c                        |
| IP100005981       | Neuronal protein NP25                                              | GFSEQLR                    | d                        |
| IP100005981       | Neuronal protein NP25                                              | GPSVGLSR                   | d; e                     |
| IP100005981       | Neuronal protein NP25                                              | QMEQISQFLK                 | c; d; e                  |
| IP100005981       | Neuronal protein NP25                                              | TTDIFQTVDLWEGK             | c; d; e                  |
| IP100005981       | Neuronal protein NP25                                              | WLMDBGTVLCK                | d; e                     |
| IP100005981       | Neuronal protein NP25                                              | YDADLENK                   | d                        |
| IP100640818       | Neuropathy target esterase                                         | GDLIGVVEALTR               | a; e                     |
| IP100217600       | Neuropathy target esterase                                         | RADRHSDFSR                 | a                        |
| IP100217600       | Neuropathy target esterase                                         | TPAPDGFR                   | a                        |
| IP100217600       | Neuropathy target esterase                                         | VPKTPAPDGPRYR              | a                        |
| IP100289501       | Neurosecretory protein VGF precursor                               | AESALLGGSEAGER             | a                        |
| IP100289501       | Neurosecretory protein VGF precursor                               | QAAAQEEER                  | d                        |
| IP100289501       | Neurosecretory protein VGF precursor                               | QAEATR                     | a                        |
| IP100163641       | neurotrophic tyrosine kinase, receptor, type 2 isoform a precursor | IWCSDPSPGVAFPR             | d; e                     |
| IP100015476       | Neutral amino acid transporter A                                   | ETVDSFLDAR                 | c; d                     |
| IP100015476       | Neutral amino acid transporter A                                   | NLFPSNLVVAEFR              | d; e                     |
| IP100220342       | NG,NG-dimethylarginine dimethylaminohydrolase 1                    | ALPESLQHALR                | d                        |
| IP100220342       | NG,NG-dimethylarginine dimethylaminohydrolase 1                    | DENATLDGGDVLFTGR           | d                        |
| IP100220342       | NG,NG-dimethylarginine dimethylaminohydrolase 1                    | DHMLIPVSMSELEK             | d                        |
| IP100220342       | NG,NG-dimethylarginine dimethylaminohydrolase 1                    | DYAVSTVPVADGLHLK           | d                        |
| IP100220342       | NG,NG-dimethylarginine dimethylaminohydrolase 1                    | EALEK                      | d                        |
| IP100220342       | NG,NG-dimethylarginine dimethylaminohydrolase 1                    | EFFVGLSK                   | c; d; e                  |
| IP100220342       | NG,NG-dimethylarginine dimethylaminohydrolase 1                    | GAEILADTFK                 | d                        |
| IP100220342       | NG,NG-dimethylarginine dimethylaminohydrolase 1                    | GEEVDVAR                   | d; e                     |
| IP100220342       | NG,NG-dimethylarginine dimethylaminohydrolase 1                    | GHVLLHR                    | d                        |
| IP100220342       | NG,NG-dimethylarginine dimethylaminohydrolase 1                    | LQLNIVEMK                  | d                        |
| IP100220342       | NG,NG-dimethylarginine dimethylaminohydrolase 1                    | LTVPDDIAANCYLNIPNK         | d                        |
| IP100220342       | NG,NG-dimethylarginine dimethylaminohydrolase 1                    | TPEEYPSAK                  | d                        |
| IP100454817       | Nicotinamide nucleotide transhydrogenase                           | AQYPIADLVK                 | e                        |
| IP100454817       | Nicotinamide nucleotide transhydrogenase                           | ESGEGQGGYAK                | d; e                     |
| IP100454817       | Nicotinamide nucleotide transhydrogenase                           | FGIHPVAGR                  | d                        |
| IP100454817       | Nicotinamide nucleotide transhydrogenase                           | GTHIGYTDLPSR               | e                        |
| IP100454817       | Nicotinamide nucleotide transhydrogenase                           | TTYLAMDQVPR                | e                        |
| IP100218845       | Nitric-oxide synthase, endothelial                                 | TQEVTSRIR                  | d                        |
| IP100549467       | Nitrilase family, member 2                                         | AVDNQVYVATASPAR            | c; d; e                  |
| IP100549467       | Nitrilase family, member 2                                         | EAATQGAK                   | c; d                     |
| IP100604590       | NME2 protein                                                       | DRPFFGLVK                  | d                        |
| IP100604590       | NME2 protein                                                       | EHYVDLK                    | d                        |
| IP100604590       | NME2 protein                                                       | EISLWFKPEELVDYK            | d                        |
| IP100604590       | NME2 protein                                                       | GDFCIQVGR                  | c; d; e                  |
| IP100604590       | NME2 protein                                                       | VMLGETNPADSKPGTIR          | d; e                     |
| IP100215887       | N-methyl-D-aspartate receptor 2C subunit precursor                 | LARVVK                     | c                        |
| IP100375531       | Non-metastatic cells 1, protein (NM23A) expressed in isoform a     | DRPFFAGLVK                 | d                        |
| IP100480098       | Notch homolog 2                                                    | CSCPPGTR                   | a                        |
| IP100480098       | Notch homolog 2                                                    | HGSLWLEGGFTLR              | a                        |
| IP100480098       | Notch homolog 2                                                    | MTRRSLPGQEQQEVAGS          | a                        |
| IP100480098       | Notch homolog 2                                                    | VASFSCMCPGK                | a                        |
| IP100646250       | Novel DnaJ domain-containing protein                               | TSLLQK                     | c; d                     |
| IP100440580       | Novel protein                                                      | AEAEAGSRPPDR               | a                        |
| IP100440580       | Novel protein                                                      | APDGLPALGPLELAPTE          | a                        |
| IP100217265       | Novel protein                                                      | ATPPPPPTIVR                | d; e                     |

| IPI Accession No. | Protein Description                                                        | Peptide Sequence*    | Primary Source Dataset** |
|-------------------|----------------------------------------------------------------------------|----------------------|--------------------------|
| IP100456733       | Novel protein                                                              | DLQESIDTLIGNLER      | a                        |
| IP100440580       | Novel protein                                                              | DPEVLR               | a                        |
| IP100456733       | Novel protein                                                              | ENRVLVPPDQR          | a                        |
| IP100478774       | Novel protein                                                              | GIVRAMVSDDR          | a                        |
| IP100478774       | Novel protein                                                              | TNNYGLLSLEIRR        | a                        |
| IP100456733       | Novel protein                                                              | LDSPLSNR             | a                        |
| IP100385194       | Novel protein                                                              | LIFLKAQEK            | a                        |
| IP100440580       | Novel protein                                                              | LLAERATTGYDDPYGG     | a                        |
| IP100553105       | Novel protein                                                              | QDTTPK               | d; e                     |
| IP100478774       | Novel protein                                                              | RLESGDRIR            | a                        |
| IP100187002       | Novel protein                                                              | SPPPPPPPR            | e                        |
| IP100440580       | Novel protein                                                              | VLAHPSDDTK           | a                        |
| IP100478774       | Novel protein                                                              | YVSPFGPR             | a                        |
| IP10055832        | Novel protein similar to phosphoglucosylase 5                              | IVQISK               | d                        |
| IP100455416       | Novel protein similar to preferentially                                    | FAQIRAEIMK           | a                        |
| IP100455416       | Novel protein similar to preferentially                                    | ILGMPFRNRSILK        | a                        |
| IP100455416       | Novel protein similar to preferentially                                    | YVSPQEK              | a                        |
| IP100397522       | Novex-3 Titin Isoform                                                      | EARKTLMEK            | a                        |
| IP100397522       | Novex-3 Titin Isoform                                                      | FQELDSGQPEEAYFK      | a                        |
| IP100397522       | Novex-3 Titin Isoform                                                      | THENVEALVER          | a                        |
| IP100032358       | Nuclear envelope pore membrane protein                                     | RPPARPAPR            | a                        |
| IP100032358       | Nuclear envelope pore membrane protein                                     | TPGARORLQAR          | a                        |
| IP100291200       | Nuclear pore complex protein Nup133                                        | HAYSWDINRALK         | a                        |
| IP100291200       | Nuclear pore complex protein Nup133                                        | MFPAAFSRPTGTGSRR     | a                        |
| IP100001738       | Nuclear pore complex protein Nup88                                         | FFSTSTSLTLK          | a                        |
| IP100410401       | Nuclear pore membrane glycoprotein                                         | DDLLHIGPGNKNYTYMA    | a                        |
| IP100410401       | Nuclear pore membrane glycoprotein                                         | EGAAFVSSRVLK         | a                        |
| IP100410401       | Nuclear pore membrane glycoprotein                                         | EVVVSASSR            | a                        |
| IP100410401       | Nuclear pore membrane glycoprotein                                         | HQQEVK               | a                        |
| IP100410401       | Nuclear pore membrane glycoprotein                                         | IYFIMLTPKLAFFPHPM    | a                        |
| IP100410401       | Nuclear pore membrane glycoprotein                                         | KSPKEISNLR           | a                        |
| IP100303260       | Nuclear protein double minute 1                                            | ADKMKEGSDSSVSSEK     | a                        |
| IP100303260       | Nuclear protein double minute 1                                            | FLSPAQVLYKAGAWTHV    | a                        |
| IP100303260       | Nuclear protein double minute 1                                            | LDVHEK               | a                        |
| IP100303260       | Nuclear protein double minute 1                                            | SAASSLRAFQTLAR       | a                        |
| IP100303260       | Nuclear protein double minute 1                                            | TRSHSADSR            | a                        |
| IP100303260       | Nuclear protein double minute 1                                            | TVDPLPLR             | a                        |
| IP100004931       | Nuclear RNA export factor 2                                                | AGQAFMLQTEGK         | a                        |
| IP100004931       | Nuclear RNA export factor 2                                                | DNFDKR               | a                        |
| IP100004931       | Nuclear RNA export factor 2                                                | FDPDLMGR             | a                        |
| IP100004931       | Nuclear RNA export factor 2                                                | IYDDEKQK             | a                        |
| IP100009901       | Nuclear transport factor 2                                                 | NINDAWVCTNDMFR       | c; d                     |
| IP100022145       | Nuclear ubiquitously casein and cyclin-dependent kinases substrate         | KVVDYSQFQESDDADEDYGR | c; d                     |
| IP100022145       | Nuclear ubiquitously casein and cyclin-dependent kinases substrate         | VVDYSQFQESDDADEDYGR  | c; d                     |
| IP100066641       | Nuclear zinc finger protein Np95                                           | GMACVGRTK            | a                        |
| IP100066641       | Nuclear zinc finger protein Np95                                           | KIQELFHVEPGLQR       | a                        |
| IP100066641       | Nuclear zinc finger protein Np95                                           | LTKVEELRR            | a                        |
| IP100066641       | Nuclear zinc finger protein Np95                                           | MASATSSSRDWDGK       | a                        |
| IP100066641       | Nuclear zinc finger protein Np95                                           | NDASEVVLAGER         | a                        |
| IP100295542       | Nucleobindin 1 precursor                                                   | DLELLIQATPR          | a                        |
| IP100295542       | Nucleobindin 1 precursor                                                   | EMEERLRMR            | a                        |
| IP100295542       | Nucleobindin 1 precursor                                                   | FHPDIDDVFPVAPAGDQ    | a                        |
| IP100295542       | Nucleobindin 1 precursor                                                   | LDELK                | a                        |
| IP100295542       | Nucleobindin 1 precursor                                                   | LQAANAEDIK           | a                        |
| IP100295542       | Nucleobindin 1 precursor                                                   | LVTLLEEFLASTQR       | a                        |
| IP100295542       | Nucleobindin 1 precursor                                                   | YLESLGEEQR           | a                        |
| IP100012315       | Nucleoside diphosphate kinase 3                                            | ALIGATNPADAPPGTIR    | e                        |
| IP100026260       | Nucleoside diphosphate kinase B                                            | GLVGEIHK             | d                        |
| IP100026260       | Nucleoside diphosphate kinase B                                            | TFIAIKPDGVQR         | c; d; e                  |
| IP100023860       | Nucleosome assembly protein 1-like 1                                       | FVEEVHDLER           | d                        |
| IP100023860       | Nucleosome assembly protein 1-like 1                                       | GIFPELWTVFK          | c; d                     |
| IP100023860       | Nucleosome assembly protein 1-like 1                                       | LDGLVETPTGYESLPR     | d; e                     |
| IP100006196       | NuMA protein                                                               | ATQEWLEK             | a                        |
| IP100006196       | NuMA protein                                                               | EAEQMGNELER          | a                        |
| IP100006196       | NuMA protein                                                               | EELQSKQAAGGLRAEL     | a                        |
| IP100006196       | NuMA protein                                                               | ELGELIPLR            | a                        |
| IP100006196       | NuMA protein                                                               | GQQEAK               | a                        |
| IP100006196       | NuMA protein                                                               | KAAPASTK             | a                        |
| IP100006196       | NuMA protein                                                               | LAELHANLAR           | a                        |
| IP100006196       | NuMA protein                                                               | LQNALNEQR            | a                        |
| IP100006196       | NuMA protein                                                               | LTAQVEELSK           | a                        |
| IP100006196       | NuMA protein                                                               | QQEQADSLER           | a                        |
| IP100006196       | NuMA protein                                                               | TKEAEQTCRHLTAQVR     | a                        |
| IP100006196       | NuMA protein                                                               | VEMLETER             | a                        |
| IP100167028       | Numb-interacting protein                                                   | SQDIPLSEASSTK        | a                        |
| IP100167028       | Numb-interacting protein                                                   | YRSMADSPK            | a                        |
| IP100100715       | Obscurin                                                                   | AMPSKFIEGLR          | a                        |
| IP100100715       | Obscurin                                                                   | EDEHFICRFEALTEAR     | a                        |
| IP100100715       | Obscurin                                                                   | GSETLRDGDPR          | a                        |
| IP100100715       | Obscurin                                                                   | IEAAGCMR             | a                        |
| IP100100715       | Obscurin                                                                   | LTLDLALGDSGQYVCR     | a                        |
| IP100100715       | Obscurin                                                                   | LVEQGGRRVEMICISK     | a                        |
| IP100100715       | Obscurin                                                                   | SGLLVLVIR            | a                        |
| IP100100715       | Obscurin                                                                   | SLTVLGLR             | a                        |
| IP100100715       | Obscurin                                                                   | SLTVLGLRAGEDAGEYVCE  | a                        |
| IP100100715       | Obscurin                                                                   | TSASLTIRPMPAHFIGR    | a                        |
| IP100386384       | Olfactory receptor 51Q1                                                    | LVCADIR              | d                        |
| IP100022490       | Olfactory receptor 7A17                                                    | AISSAQGK             | d                        |
| IP100295832       | Oligodendrocyte-myelin glycoprotein precursor                              | SDFATQWNKL           | d                        |
| IP100552450       | Opioid binding protein/cell adhesion molecule-like isoform b preproprotein | DQSGEYCSALNDVAAPDVR  | d; e                     |
| IP100552450       | Opioid binding protein/cell adhesion molecule-like isoform b preproprotein | EGQGFVSEDEYLEISDIK   | d                        |
| IP100552450       | Opioid binding protein/cell adhesion molecule-like isoform b preproprotein | NTGVSVGQK            | d                        |
| IP100107752       | Optic atrophy 1 isoform 7                                                  | AVEVAWETLQEEFSR      | d                        |
| IP100107752       | Optic atrophy 1 isoform 7                                                  | CNEEHPAYLASDEITTVR   | e                        |
| IP100107752       | Optic atrophy 1 isoform 7                                                  | DFFTSGSPPEATAFR      | d; e                     |
| IP100107752       | Optic atrophy 1 isoform 7                                                  | EYEEFFQNSK           | e                        |
| IP100107752       | Optic atrophy 1 isoform 7                                                  | TSVLEMLAQAR          | e                        |

| IPI Accession No. | Protein Description                                                               | Peptide Sequence*   | Primary Source Dataset** |
|-------------------|-----------------------------------------------------------------------------------|---------------------|--------------------------|
| IP00107752        | Optic atrophy 1 isoform 7                                                         | VVVVQDSAGK          | e                        |
| IP00107752        | Optic atrophy 1 isoform 7                                                         | WLYWK               | d                        |
| IP00107752        | Optic atrophy 1 isoform 7                                                         | WNDFAEDSLR          | e                        |
| IP00013215        | Origin recognition complex subunit 1                                              | IESRHSASKSR         | a                        |
| IP00013215        | Origin recognition complex subunit 1                                              | IMMNR               | a                        |
| IP00013215        | Origin recognition complex subunit 1                                              | KVAFSEITSPSK        | a                        |
| IP00013215        | Origin recognition complex subunit 1                                              | MAHYPTRLKTR         | a                        |
| IP00013215        | Origin recognition complex subunit 1                                              | SRQTPHTPLTPRAR      | a                        |
| IP00013215        | Origin recognition complex subunit 1                                              | SSVLTMR             | a                        |
| IP00035355        | Orphan sodium- and chloride-dependent neurotransmitter transporter NTT4           | YSGYLLASTPESEL      | e                        |
| IP00295485        | Osmotic stress protein 94                                                         | NENKDNMDK           | a                        |
| IP00295485        | Osmotic stress protein 94                                                         | SVMAAAQVAGLNCLR     | a                        |
| IP00295485        | Osmotic stress protein 94                                                         | VIEAYRNK            | a                        |
| IP00050032        | OTTHUMP0000016039                                                                 | YIQELWR             | d                        |
| IP00640299        | OTTHUMP0000016550 (Fragment)                                                      | GLWAGWVFNQIR        | e                        |
| IP00473101        | OTTHUMP0000016904                                                                 | LTVDK               | a                        |
| IP00473101        | OTTHUMP0000016904                                                                 | SGDELQDELEIEK       | a                        |
| IP00479349        | OTTHUMP0000017246                                                                 | DDFMEIK             | a                        |
| IP00479349        | OTTHUMP0000017246                                                                 | MGLNDFIQK           | a                        |
| IP00479349        | OTTHUMP0000017246                                                                 | NVLLK               | a                        |
| IP00052219        | OTTHUMP0000018075                                                                 | XEETIK              | d                        |
| IP00738668        | OTTHUMP0000018488                                                                 | EDTEEVNLR           | d                        |
| IP00738668        | OTTHUMP0000018488                                                                 | IFVGGIK             | d                        |
| IP00414795        | OTTHUMP0000021596                                                                 | CFICGREGHIK         | a                        |
| IP00414795        | OTTHUMP0000021596                                                                 | GSLSSYAYTLMVLYFLQQ  | a                        |
| IP00182020        | OTTHUMP0000028838                                                                 | YPDFSEYR            | c; d                     |
| IP00478327        | OTTHUMP0000028841                                                                 | IEDFLER             | d                        |
| IP00641731        | OTTHUMP0000029951                                                                 | EFPPTAR             | d                        |
| IP00375705        | OTTHUMP0000029994                                                                 | VPPTLEVTQQPVR       | d                        |
| IP00645676        | OTTHUMP0000030683                                                                 | VADIGLAAWGR         | d                        |
| IP00642700        | OTTHUMP0000030685                                                                 | GISEETTGVHNLKY      | d                        |
| IP00642700        | OTTHUMP0000030685                                                                 | YPQLLGIR            | d                        |
| IP00412497        | OTTHUMP0000030692                                                                 | DIDPQNDLTLR         | e                        |
| IP00644065        | OTTHUMP0000030706                                                                 | VEPWNSVR            | e                        |
| IP00607638        | OTTHUMP0000030828                                                                 | GAPSQDESGGIEDSPDR   | d                        |
| IP00022796        | OTTHUMP0000031372                                                                 | GEHPGLSIGDVAK       | d                        |
| IP00218725        | OTTHUMP0000040303                                                                 | ATYGNFMQRSR         | a                        |
| IP00218725        | OTTHUMP0000040303                                                                 | EHSVHVERTR          | a                        |
| IP00218725        | OTTHUMP0000040303                                                                 | GYTGYDCK            | a                        |
| IP00218725        | OTTHUMP0000040303                                                                 | HLSPQRAPER          | a                        |
| IP00218725        | OTTHUMP0000040303                                                                 | SLGEFIKELAR         | a                        |
| IP00415036        | OTTHUMP0000044730                                                                 | EINVMVYNK           | a                        |
| IP00415036        | OTTHUMP0000044730                                                                 | QQPMDK              | a                        |
| IP00295816        | OTTHUMP0000044920                                                                 | EFSLEK              | a                        |
| IP00295816        | OTTHUMP0000044920                                                                 | ISELETEVTSLRR       | a                        |
| IP00295816        | OTTHUMP0000044920                                                                 | SEIEYLQEKLK         | a                        |
| IP00295816        | OTTHUMP0000044920                                                                 | SFSEMLQNLDK         | a                        |
| IP00295816        | OTTHUMP0000044920                                                                 | YSTDAKIK            | a                        |
| IP00301293        | OTTHUMP0000046646                                                                 | LDADVIGSR           | a                        |
| IP00477409        | OTTHUMP0000059187                                                                 | ATVVGPDSSK          | a                        |
| IP00477409        | OTTHUMP0000059187                                                                 | LGPSVGLAR           | a                        |
| IP00477409        | OTTHUMP0000059187                                                                 | QTKPAEAPR           | a                        |
| IP00477409        | OTTHUMP0000059187                                                                 | SQAAASHR            | a                        |
| IP00477409        | OTTHUMP0000059187                                                                 | VGEQMR              | a                        |
| IP00477409        | OTTHUMP0000059187                                                                 | VGQYLNCIVEVKV       | a                        |
| IP00010604        | OTTHUMP0000059579                                                                 | ESTVNSIFQVIR        | a                        |
| IP00010604        | OTTHUMP0000059579                                                                 | MWQFMDQSDIETMRSLK   | a                        |
| IP00010604        | OTTHUMP0000059579                                                                 | STKQPR              | a                        |
| IP00174347        | OTTHUMP0000060403                                                                 | QINNELKPPGVR        | a                        |
| IP00174347        | OTTHUMP0000060403                                                                 | SPSVASMK            | a                        |
| IP00293338        | OTTHUMP0000063367                                                                 | DPSSEVPSK           | a                        |
| IP00293338        | OTTHUMP0000063367                                                                 | HLEEQLKEIHR         | a                        |
| IP00293338        | OTTHUMP0000063367                                                                 | SLNELK              | a                        |
| IP00293338        | OTTHUMP0000063367                                                                 | VIQETRLK            | a                        |
| IP00293338        | OTTHUMP0000063367                                                                 | VVDEINQGMDPINERR    | a                        |
| IP00328216        | OTTHUMP0000063970                                                                 | ELGRNGSMHHLFFFT     | a                        |
| IP00328216        | OTTHUMP0000063970                                                                 | IFGLMEK             | a                        |
| IP00328216        | OTTHUMP0000063970                                                                 | NESPGAPPAGK         | a                        |
| IP00328216        | OTTHUMP0000063970                                                                 | RSSMIETGQGAEGGLSL   | a                        |
| IP00045600        | OTTHUMP0000064028                                                                 | EEYMSFMNQLEHEWTN    | a                        |
| IP00045600        | OTTHUMP0000064028                                                                 | TARTLTLIAK          | a                        |
| IP00514714        | OTTHUMP0000065101                                                                 | SLGAEHVITEELR       | d                        |
| IP00103552        | Ovarian cancer related tumor marker                                               | EDVTSIPGPAQSTISPDIS | a                        |
| IP00103552        | Ovarian cancer related tumor marker                                               | ESSTSEK             | a                        |
| IP00103552        | Ovarian cancer related tumor marker                                               | FPDIFSASSR          | a                        |
| IP00103552        | Ovarian cancer related tumor marker                                               | HPGSRK              | a                        |
| IP00103552        | Ovarian cancer related tumor marker                                               | ISSPNLISPAK         | a                        |
| IP00103552        | Ovarian cancer related tumor marker                                               | ITDMDTNLEPVR        | a                        |
| IP00103552        | Ovarian cancer related tumor marker                                               | LREITISQK           | a                        |
| IP00103552        | Ovarian cancer related tumor marker                                               | LTRITSLPISESLVFR    | a                        |
| IP00103552        | Ovarian cancer related tumor marker                                               | MTRNGTQLQNFTLDR     | a                        |
| IP00103552        | Ovarian cancer related tumor marker                                               | SASLSGMPTGATTKVSR   | a                        |
| IP00103552        | Ovarian cancer related tumor marker                                               | SLMTGSRSTK          | a                        |
| IP00103552        | Ovarian cancer related tumor marker                                               | TSISDLRPTIAPDSTGMI  | a                        |
| IP00098902        | Oxoglutarate (alpha-ketoglutarate) dehydrogenase (liposamide) isoform 1 precursor | IEQLSPFPDILLK       | e                        |
| IP00098902        | Oxoglutarate (alpha-ketoglutarate) dehydrogenase (liposamide) isoform 1 precursor | LLDTAFDLDFVK        | d                        |
| IP00098902        | Oxoglutarate (alpha-ketoglutarate) dehydrogenase (liposamide) isoform 1 precursor | LNVLANVIR           | d                        |
| IP00098902        | Oxoglutarate (alpha-ketoglutarate) dehydrogenase (liposamide) isoform 1 precursor | QILLPFR             | d; e                     |
| IP00098902        | Oxoglutarate (alpha-ketoglutarate) dehydrogenase (liposamide) isoform 1 precursor | SSPYPTDVAR          | e                        |
| IP00386497        | oxoglutarate (alpha-ketoglutarate) dehydrogenase (liposamide) isoform 2 precursor | SWDIFFR             | c; d                     |
| IP00643720        | Oxoglutarate dehydrogenase-like                                                   | DFAAAPATGNR         | e                        |
| IP00643720        | Oxoglutarate dehydrogenase-like                                                   | SWDSFFR             | e                        |
| IP00643720        | Oxoglutarate dehydrogenase-like                                                   | VIPEDGAAAR          | e                        |
| IP00011044        | Oxygen-regulated protein 1                                                        | HRFYRPTPLGLRR       | a                        |
| IP00011044        | Oxygen-regulated protein 1                                                        | ILSSVASK            | a                        |
| IP00011044        | Oxygen-regulated protein 1                                                        | LVVQEINLAR          | a                        |
| IP00011044        | Oxygen-regulated protein 1                                                        | VVVNFR              | a                        |

| IPI Accession No. | Protein Description                                    | Peptide Sequence*  | Primary Source Dataset** |
|-------------------|--------------------------------------------------------|--------------------|--------------------------|
| IP100025890       | P120                                                   | FFHSNQK            | a                        |
| IP100025890       | P120                                                   | FIEDRITEESKSSR     | a                        |
| IP100025890       | P120                                                   | MQQAGMALYK         | a                        |
| IP100025890       | P120                                                   | YGAFEK             | a                        |
| IP100025890       | P120                                                   | YXHGLEFGK          | a                        |
| IP100025890       | P120                                                   | YXHGLEFGTKCLK      | a                        |
| IP100011301       | P15 protein                                            | AGARALHPPSGR       | a                        |
| IP100385559       | P15 protein                                            | VRACARGGR          | a                        |
| IP100022479       | P532                                                   | GPMHSQLESLSDSWAR   | a                        |
| IP100022479       | P532                                                   | ITLGEQAALANPHDR    | a                        |
| IP100022479       | P532                                                   | KLTFEPIHR          | a                        |
| IP100022479       | P532                                                   | SSTDALIEMGVR       | a                        |
| IP100022479       | P532                                                   | TIALLIGR           | a                        |
| IP100022479       | P532                                                   | TPLFSDGVEMDTPQLDK  | a                        |
| IP100022479       | P532                                                   | VTAAQVLLARTMVMR    | a                        |
| IP100179473       | P60                                                    | INESIK             | a                        |
| IP100179473       | P60                                                    | LIEHNQR            | a                        |
| IP100179473       | P60                                                    | LVMSYVAAVCGK       | a                        |
| IP100179473       | P60                                                    | TKIFIRSPK          | a                        |
| IP100384420       | P67                                                    | AVPLALALISVSNPR    | e                        |
| IP100645522       | PADI2 protein                                          | ELLGPDFGVVTR       | d; e                     |
| IP100645522       | PADI2 protein                                          | GFPVVLDSR          | d; e                     |
| IP100645522       | PADI2 protein                                          | NGVYVENPFEGQR      | e                        |
| IP100514424       | Palmitoyl-protein thioesterase 1                       | ETIPLQETSLYTQDR    | d; e                     |
| IP100514248       | Palmitoyl-protein thioesterase 1                       | LQQQYAMGFSQGGQFLR  | d                        |
| IP100219703       | Parvalbumin                                            | FFQMVGLK           | a; c                     |
| IP100219703       | Parvalbumin                                            | SGFIEDELGFILK      | a                        |
| IP100219703       | Parvalbumin alpha                                      | GFSPPAR            | c                        |
| IP100219703       | Parvalbumin alpha                                      | IGVDEFTLVAES       | e                        |
| IP100292471       | PARX protein                                           | ELQDEQLK           | a                        |
| IP100292471       | PARX protein                                           | KAGQSLQMEFLYHNK    | a                        |
| IP100292471       | PARX protein                                           | SQYPSQDDK          | a                        |
| IP100376955       | PCTAIRE protein kinase 2                               | GELKLADFLARAK      | a                        |
| IP100376955       | PCTAIRE protein kinase 2                               | LADFLARAK          | a                        |
| IP100246058       | PDCD6IP protein                                        | ATFISMQLK          | a                        |
| IP100246058       | PDCD6IP protein                                        | FIQQTYPGSGEEQAQYCR | e                        |
| IP100246058       | PDCD6IP protein                                        | KQEGLLKNIQVSHQEFK  | a                        |
| IP100246058       | PDCD6IP protein                                        | TVLDK              | a                        |
| IP100155647       | PDZ domain-containing protein AIPC                     | ARSPVRLPEGSPSPGE   | a                        |
| IP100155647       | PDZ domain-containing protein AIPC                     | DALYVVIKGMQDPRPSA  | a                        |
| IP100155647       | PDZ domain-containing protein AIPC                     | GGNIMASDRLER       | a                        |
| IP100155647       | PDZ domain-containing protein AIPC                     | IQMVSSSQK          | a                        |
| IP100155647       | PDZ domain-containing protein AIPC                     | TKLVSPSLTPCSTPTHMS | a                        |
| IP100177543       | Peptidylglycine alpha-amidating                        | AFGADSEHK          | a                        |
| IP100177543       | Peptidylglycine alpha-amidating                        | EAEAVVETK          | a                        |
| IP100177543       | Peptidylglycine alpha-amidating                        | TDTKFVR            | a                        |
| IP100177543       | Peptidylglycine alpha-amidating                        | VVNSDISCHYK        | a                        |
| IP100647507       | Peptidyl-prolyl cis-trans isomerase                    | FMLGK              | c                        |
| IP100647507       | Peptidyl-prolyl cis-trans isomerase                    | GWEEGVAQMSVQGR     | d; e                     |
| IP100647507       | Peptidyl-prolyl cis-trans isomerase                    | QEVIR              | d                        |
| IP100419585       | Peptidyl-prolyl cis-trans isomerase A                  | ALSTGEK            | d                        |
| IP100419585       | Peptidyl-prolyl cis-trans isomerase A                  | EGMNIVEAMER        | d                        |
| IP100419585       | Peptidyl-prolyl cis-trans isomerase A                  | GFGYK              | d                        |
| IP100419585       | Peptidyl-prolyl cis-trans isomerase A                  | IIPGFMCGGDFTR      | d; e                     |
| IP100419585       | Peptidyl-prolyl cis-trans isomerase A                  | KITADCGQLE         | d                        |
| IP100419585       | Peptidyl-prolyl cis-trans isomerase A                  | SIYGEKFEDEFILK     | d                        |
| IP100419585       | Peptidyl-prolyl cis-trans isomerase A                  | TAENFR             | c; d; e                  |
| IP100419585       | Peptidyl-prolyl cis-trans isomerase A                  | TEWLDGK            | c; d; e                  |
| IP100419585       | Peptidyl-prolyl cis-trans isomerase A                  | VNPTVFFDIADVGEPLGR | c; d                     |
| IP100013723       | Peptidyl-prolyl cis-trans isomerase NIMA-interacting 1 | GQMQLKPFEDASFALR   | d                        |
| IP100472718       | peptidylprolyl isomerase A isoform 2                   | MCQGGDFTR          | d                        |
| IP100549466       | peptidylprolyl isomerase A-like                        | FEDEFILK           | c; e                     |
| IP100549466       | peptidylprolyl isomerase A-like                        | YSFELFADK          | c; d; e                  |
| IP100646304       | peptidylprolyl isomerase B precursor                   | VIFLFGK            | c; d; e                  |
| IP100023856       | Peregrin                                               | EQGGAVVRQAR        | a                        |
| IP100023856       | Peregrin                                               | GGAFKQTDGGR        | a                        |
| IP100412869       | Pericentrin 2                                          | ASLETQRAQSSR       | a                        |
| IP100412869       | Pericentrin 2                                          | KRAEAPR            | a                        |
| IP100412869       | Pericentrin 2                                          | RAQELALLQSR        | a                        |
| IP100010692       | Period circadian protein 3                             | SEMPINGR           | a                        |
| IP100013164       | Peripherin                                             | DVDDATLSR          | a                        |
| IP100013164       | Peripherin                                             | GELSQAR            | a                        |
| IP100013164       | Peripherin                                             | GTNEALLR           | a                        |
| IP100298057       | Periplakin                                             | DRVQIELLLR         | a                        |
| IP100298057       | Periplakin                                             | EKVYHTQK           | a                        |
| IP100298057       | Periplakin                                             | ELDDQEK            | a                        |
| IP100298057       | Periplakin                                             | NLLDEIASR          | a                        |
| IP100298057       | Periplakin                                             | VVQQEVVRYEEPEGLR   | a                        |
| IP100375400       | Peroxisomal protein 2 isoform b                        | ATAVVDGAFK         | c; d                     |
| IP100375400       | Peroxisomal protein 2 isoform b                        | EGGLGPNLPLLADVTR   | d; e                     |
| IP100375400       | Peroxisomal protein 2 isoform b                        | GLFHDGK            | c                        |
| IP100375400       | Peroxisomal protein 2 isoform b                        | IGKPAPEFK          | d                        |
| IP100375400       | Peroxisomal protein 2 isoform b                        | LSEDEVGLK          | c; d                     |
| IP100375400       | Peroxisomal protein 2 isoform b                        | SVDEALR            | d                        |
| IP100375400       | Peroxisomal protein 2 isoform b                        | TDEGIAYR           | c                        |
| IP100374151       | peroxiredoxin 3 isoform b                              | DLSLDDFK           | d                        |
| IP100374151       | peroxiredoxin 3 isoform b                              | DYGVLLLEGSLALR     | c; d                     |
| IP100374151       | peroxiredoxin 3 isoform b                              | HLSVNDLPVGR        | d                        |
| IP100375306       | peroxiredoxin 5 precursor, isoform b                   | ETDLLDDSLVSIFGNR   | d                        |
| IP100375306       | peroxiredoxin 5 precursor, isoform b                   | FSMIVQDQIVK        | d                        |
| IP100375306       | peroxiredoxin 5 precursor, isoform b                   | LLADPTGAFGK        | c; d                     |
| IP100375306       | peroxiredoxin 5 precursor, isoform b                   | VGDAPAVEYFEGEPGNK  | d                        |
| IP100375306       | peroxiredoxin 5 precursor, isoform b                   | VNLAELEK           | c                        |
| IP100000874       | Peroxisomal protein 1                                  | ADEGISFR           | c; d                     |
| IP100000874       | Peroxisomal protein 1                                  | AEEFK              | c; d                     |
| IP100000874       | Peroxisomal protein 1                                  | DISLSDYK           | c; d                     |
| IP100000874       | Peroxisomal protein 1                                  | GLFHDDK            | c; d; e                  |

| IPI Accession No. | Protein Description                                       | Peptide Sequence*    | Primary Source Dataset** |
|-------------------|-----------------------------------------------------------|----------------------|--------------------------|
| IP10000874        | Peroxisredoxin-1                                          | IGHPAFNFK            | d                        |
| IP10000874        | Peroxisredoxin-2                                          | ATAVMPDGFQFK         | c; d; e                  |
| IP100027350       | Peroxisredoxin-2                                          | KEGGLGPLNPLLDVTR     | c; d                     |
| IP100027350       | Peroxisredoxin-2                                          | LSDYK                | c; d                     |
| IP100220301       | Peroxisredoxin-6                                          | DFTVPCTTELGR         | c; d                     |
| IP100220301       | Peroxisredoxin-6                                          | DINAYNCEPTEK         | c; d                     |
| IP100220301       | Peroxisredoxin-6                                          | ELAILLGLMDPAEKDEK    | d                        |
| IP100220301       | Peroxisredoxin-6                                          | ELPSGK               | c                        |
| IP100220301       | Peroxisredoxin-6                                          | GMPVTR               | c; d                     |
| IP100220301       | Peroxisredoxin-6                                          | LAPEFAK              | d                        |
| IP100220301       | Peroxisredoxin-6                                          | LIALSIDSVEDHLAWSK    | d                        |
| IP100220301       | Peroxisredoxin-6                                          | LPPHIDDR             | c; d; e; g               |
| IP100220301       | Peroxisredoxin-6                                          | LSILYPATTGR          | c; d                     |
| IP100220301       | Peroxisredoxin-6                                          | NFDEILR              | c; d                     |
| IP100220301       | Peroxisredoxin-6                                          | PGGLLLGDVAPNFEANTVGR | c; d                     |
| IP100220301       | Peroxisredoxin-6                                          | VATPYVDWK            | c; d                     |
| IP100220301       | Peroxisredoxin-6                                          | VVFVFGPDK            | c; d                     |
| IP100220301       | Peroxisredoxin-6                                          | VVFVFGPDKK           | d                        |
| IP100221002       | Peroxisomal membrane protein 2                            | AEAGLGALPR           | c                        |
| IP100019912       | Peroxisomal multifunctional enzyme type 2                 | AVANYDSVEEGER        | c                        |
| IP100019912       | Peroxisomal multifunctional enzyme type 2                 | ISDEDWDIHR           | d                        |
| IP100019912       | Peroxisomal multifunctional enzyme type 2                 | NYQGPAAK             | d; e                     |
| IP100174345       | PF6                                                       | IPTQSLLDQVAGQTR      | a                        |
| IP100174345       | PF6                                                       | KTTQLK               | a                        |
| IP100174345       | PF6                                                       | SPYKEK               | a                        |
| IP100174345       | PF6                                                       | VLLQVLQEAHK          | a                        |
| IP100430079       | PHD finger protein 8                                      | EALPDHDEIPETVRTVQ    | a                        |
| IP100430079       | PHD finger protein 8                                      | STTPMAGCVFLTR        | a                        |
| IP100031820       | Phenylalanyl-tRNA synthetase alpha chain                  | SLQALGEVIEAELR       | d                        |
| IP100300074       | Phenylalanyl-tRNA synthetase beta chain                   | YDLLCLEGLVR          | d                        |
| IP100020366       | Phosphate-regulating neutral endopeptidase                | DLFRILGSESR          | d                        |
| IP100219446       | Phosphatidylethanolamine-binding protein 1                | APVAGTCYQAEWDDYVPK   | c; d; e                  |
| IP100219446       | Phosphatidylethanolamine-binding protein 1                | CDEPLSNR             | b; c; d; e               |
| IP100219446       | Phosphatidylethanolamine-binding protein 1                | GNDISSGTVLSDYVSGSPPK | c; d; e; g               |
| IP100219446       | Phosphatidylethanolamine-binding protein 1                | KYELR                | d                        |
| IP100219446       | Phosphatidylethanolamine-binding protein 1                | LYEQLSGK             | c; d; e                  |
| IP100219446       | Phosphatidylethanolamine-binding protein 1                | NRPTISWDGLDSGK       | d                        |
| IP100219446       | Phosphatidylethanolamine-binding protein 1                | PVDLSK               | d                        |
| IP100219446       | Phosphatidylethanolamine-binding protein 1                | VLTPYQVK             | c; d; e                  |
| IP100219446       | Phosphatidylethanolamine-binding protein 1                | YVWLVEQDRPLK         | d; e                     |
| IP100021448       | Phosphatidylinositol 3-kinase regulatory                  | DGFTLVR              | a                        |
| IP100021448       | Phosphatidylinositol 3-kinase regulatory                  | LRDTADGFTLVR         | a                        |
| IP100395672       | Phosphatidylinositol 3-kinase-related                     | ASQVTELCNHHFESLR     | a                        |
| IP100395672       | Phosphatidylinositol 3-kinase-related                     | AVRDPK               | a                        |
| IP100395672       | Phosphatidylinositol 3-kinase-related                     | LSSGGGGGGTK          | a                        |
| IP100395672       | Phosphatidylinositol 3-kinase-related                     | LSTQGVDEK            | a                        |
| IP100395672       | Phosphatidylinositol 3-kinase-related                     | NSYAVSVWKR           | a                        |
| IP100395672       | Phosphatidylinositol 3-kinase-related                     | QFLGEYK              | a                        |
| IP100395672       | Phosphatidylinositol 3-kinase-related                     | TVGLSLDVSRR          | a                        |
| IP100216048       | Phosphatidylinositol transfer protein alpha isoform       | QLFCWLDK             | d                        |
| IP100031386       | Phosphatidylinositol-4,5-bisphosphate                     | FPDMSVIEEHANWSVR     | a                        |
| IP100031386       | Phosphatidylinositol-4,5-bisphosphate                     | GAQECTK              | a                        |
| IP100031386       | Phosphatidylinositol-4,5-bisphosphate                     | ISTATPYMNGEISTK      | a                        |
| IP100292056       | Phosphatidylinositol-4-phosphate                          | LFIMVMIHR            | a                        |
| IP100292056       | Phosphatidylinositol-4-phosphate                          | QDMLTLQMR            | a                        |
| IP100029009       | Phosphatidylinositol-4-phosphate 5-kinase type-1 gamma    | QAQGAQTSDEK          | e                        |
| IP100029009       | Phosphatidylinositol-4-phosphate 5-kinase type-1 gamma    | SPSETSEQPR           | e                        |
| IP100009688       | Phosphatidylinositol-4-phosphate 5-kinase type-2 alpha    | FLDFIGHILT           | d                        |
| IP100152303       | Phosphatidylinositol-4-phosphate 5-kinase, type II, gamma | ELPTLR               | d                        |
| IP100152303       | Phosphatidylinositol-4-phosphate 5-kinase, type II, gamma | NPPSESEGDGR          | e                        |
| IP100470939       | Phosphodiesterase 4D interacting protein                  | LAKNEAAR             | a                        |
| IP100470939       | Phosphodiesterase 4D interacting protein                  | VASVSEGGQEISGNRR     | a                        |
| IP100470939       | Phosphodiesterase 4D interacting protein                  | WACPPFVQLPIC         | a                        |
| IP100294380       | Phosphoenolpyruvate carboxykinase,                        | DIRSYLTEQVNDLPEK     | a                        |
| IP100294380       | Phosphoenolpyruvate carboxykinase,                        | EPCAHPNSR            | a                        |
| IP100292709       | Phosphoenolpyruvate carboxykinase,                        | IFHVNWFR             | a                        |
| IP100294380       | Phosphoenolpyruvate carboxykinase,                        | LEGEDSAR             | a                        |
| IP100292709       | Phosphoenolpyruvate carboxykinase,                        | MGTPVLEALGDGEFVK     | a                        |
| IP100743142       | phosphofructokinase, muscle                               | DQTFEHR              | d                        |
| IP100743142       | phosphofructokinase, muscle                               | GGTPSAFDR            | d                        |
| IP100743142       | phosphofructokinase, muscle                               | IMEIVDATTTAQSHQR     | d                        |
| IP100743142       | phosphofructokinase, muscle                               | SEWSDLLSDLQK         | c; d                     |
| IP100743142       | phosphofructokinase, muscle                               | TFVLEVNGR            | d; e                     |
| IP100743142       | phosphofructokinase, muscle                               | VTVLGHVQR            | d                        |
| IP100643196       | Phosphofructokinase, platelet                             | EIGWTDVGGWTGQGSILGK  | e                        |
| IP100643196       | Phosphofructokinase, platelet                             | ELVVTQLGYDTR         | e                        |
| IP100643196       | Phosphofructokinase, platelet                             | EQWWLK               | d; e                     |
| IP100643196       | Phosphofructokinase, platelet                             | EWSGLLEELAR          | e                        |
| IP100643196       | Phosphofructokinase, platelet                             | GITNLCVIGGGSLTGANLFR | d                        |
| IP100643196       | Phosphofructokinase, platelet                             | NVIFQVPAELK          | d                        |
| IP100219526       | Phosphoglucosyltransferase 1                              | ADNFEYSDPVDGSISR     | c; d                     |
| IP100219526       | Phosphoglucosyltransferase 1                              | DLEALMFDK            | c; d                     |
| IP100219526       | Phosphoglucosyltransferase 1                              | FFGNLMDASK           | c                        |
| IP100219526       | phosphoglucosyltransferase 1                              | IFQISK               | d                        |
| IP100219527       | Phosphoglucosyltransferase 1                              | QFSANDK              | c; d                     |
| IP100219526       | Phosphoglucosyltransferase 1                              | QQFDLENK             | d                        |
| IP100219526       | Phosphoglucosyltransferase 1                              | SGEHDFGAFFDGGDDR     | c; d                     |
| IP100219526       | Phosphoglucosyltransferase 1                              | SIFDFSALK            | d                        |
| IP100746758       | Phosphoglucosyltransferase 1                              | YDYEEVEAEGANK        | c; d                     |
| IP100173346       | Phosphoglucosyltransferase-2-like 1                       | EGFHFEETLPGFK        | d                        |
| IP100642548       | Phosphoglycerate dehydrogenase                            | AGTGVNDVLEAATR       | d                        |
| IP100642548       | Phosphoglycerate dehydrogenase                            | AWAGSPK              | c                        |
| IP100642548       | Phosphoglycerate dehydrogenase                            | DLPLLLFR             | c; d; e                  |
| IP100169383       | Phosphoglycerate kinase 1                                 | AAVPSIK              | c; d                     |
| IP100169383       | Phosphoglycerate kinase 1                                 | ACANPAAGSVILLENLR    | d; e                     |
| IP100169383       | Phosphoglycerate kinase 1                                 | AGGFMLK              | d                        |
| IP100169383       | Phosphoglycerate kinase 1                                 | AHSSMVGVNLPQK        | c; d                     |

| IPI Accession No. | Protein Description                                                                | Peptide Sequence*      | Primary Source Dataset** |
|-------------------|------------------------------------------------------------------------------------|------------------------|--------------------------|
| IP00169383        | Phosphoglycerate kinase 1                                                          | ALESERPFLAILGGAK       | d; e                     |
| IP00169383        | Phosphoglycerate kinase 1                                                          | ALMDEVVK               | d                        |
| IP00169383        | Phosphoglycerate kinase 1                                                          | DCVGPVEVK              | c; d                     |
| IP00169383        | Phosphoglycerate kinase 1                                                          | DVLFLEK                | c; d                     |
| IP00169383        | Phosphoglycerate kinase 1                                                          | ELNYFAK                | c; d                     |
| IP00169383        | Phosphoglycerate kinase 1                                                          | FCLDNGAK               | d                        |
| IP00169383        | Phosphoglycerate kinase 1                                                          | FDENAK                 | c; d                     |
| IP00169383        | Phosphoglycerate kinase 1                                                          | FHVVEEGK               | d                        |
| IP00169383        | Phosphoglycerate kinase 1                                                          | GCTIHGGDDTATCCA        | d                        |
| IP00169383        | Phosphoglycerate kinase 1                                                          | IEAFR                  | c                        |
| IP00169383        | Phosphoglycerate kinase 1                                                          | IQLNNMLDK              | d                        |
| IP00169383        | Phosphoglycerate kinase 1                                                          | ITLPVDFVTADK           | d                        |
| IP00169383        | Phosphoglycerate kinase 1                                                          | ITLPVDFVTADKFDENAK     | d                        |
| IP00169383        | Phosphoglycerate kinase 1                                                          | KYAEAVTR               | c                        |
| IP00169383        | Phosphoglycerate kinase 1                                                          | NNQITNNQR              | d; e                     |
| IP00169383        | Phosphoglycerate kinase 1                                                          | VDENVPMK               | d                        |
| IP00169383        | Phosphoglycerate kinase 1                                                          | VLNMMERGTSLFDEEGAK     | d                        |
| IP00169383        | Phosphoglycerate kinase 1                                                          | VLPGVDAISNI            | c; d                     |
| IP00169383        | Phosphoglycerate kinase 1                                                          | VSHVSTGGGASLELEGK      | d                        |
| IP00169383        | Phosphoglycerate kinase 1                                                          | WNTEDK                 | c                        |
| IP00169383        | Phosphoglycerate kinase 1                                                          | YAEAVTR                | d                        |
| IP00169383        | Phosphoglycerate kinase 1                                                          | YSLEPVAVELK            | d                        |
| IP00219568        | Phosphoglycerate kinase, testis specific                                           | ELDYFAK                | d                        |
| IP00549725        | Phosphoglycerate mutase 1                                                          | ALPFWNEEIVPQIK         | c; d; e                  |
| IP00549725        | Phosphoglycerate mutase 1                                                          | AMEAVAAQGK             | c; d; e                  |
| IP00549725        | Phosphoglycerate mutase 1                                                          | DAGYEFDICFTSVQK        | d                        |
| IP00549725        | Phosphoglycerate mutase 1                                                          | FSGWYDADLSFAGHEEAK     | c; d                     |
| IP00549725        | Phosphoglycerate mutase 1                                                          | GGQALR                 | c; d                     |
| IP00549725        | Phosphoglycerate mutase 1                                                          | SYDVPPPPMPEPDHPFYSNISK | d; e                     |
| IP00549725        | Phosphoglycerate mutase 1                                                          | VLIAAHGNSLR            | d                        |
| IP00549725        | Phosphoglycerate mutase 1                                                          | YADLTEDQLPSCESLKDITAR  | d                        |
| IP00477104        | Phosphoinositol 3-phosphate-binding                                                | EESILGSIPLSFR          | a                        |
| IP00477104        | Phosphoinositol 3-phosphate-binding                                                | EIWRIQDVMIEGLR         | a                        |
| IP00477104        | Phosphoinositol 3-phosphate-binding                                                | MSVVEQDR               | a                        |
| IP00477104        | Phosphoinositol 3-phosphate-binding                                                | MSVVEQDRMR             | a                        |
| IP00010442        | Phospholemmann precursor                                                           | TGEPDEEGTFR            | d; e                     |
| IP00064342        | Phosphoprotein enriched in astrocytes 15                                           | DNLSVIEHFEISR          | d                        |
| IP000552198       | Phosphoprotein enriched in astrocytes 15                                           | ISEDELDTK              | d                        |
| IP00064342        | Phosphoprotein enriched in astrocytes 15                                           | SEIITGSAWVFLSHNK       | d                        |
| IP000552495       | Phosphoribosyl pyrophosphate synthetase 1                                          | LNVDFAIHK              | d                        |
| IP00290933        | Pwi-like 1                                                                         | VCLQAALR               | a                        |
| IP00009522        | PKY protein kinase                                                                 | LMIEWEFGK              | a                        |
| IP00009522        | PKY protein kinase                                                                 | NRLHFLEGPKR            | a                        |
| IP00009522        | PKY protein kinase                                                                 | STRFFCK                | a                        |
| IP00009522        | PKY protein kinase                                                                 | TLEEHEAETGMK           | a                        |
| IP00022420        | Plasma retinol-binding protein precursor                                           | ENFDK                  | a                        |
| IP00022420        | Plasma retinol-binding protein precursor                                           | QEELCLAR               | a                        |
| IP00218728        | Platelet-activating factor acetylhydrolase IB alpha subunit                        | EEFTSGGGLGQK           | c; d                     |
| IP00026546        | Platelet-activating factor acetylhydrolase IB beta subunit                         | ELFSPPLHALNFGGGDTTR    | d                        |
| IP00026546        | Platelet-activating factor acetylhydrolase IB beta subunit                         | HVLWR                  | c                        |
| IP00026546        | Platelet-activating factor acetylhydrolase IB beta subunit                         | IIVLGLLR               | d; e                     |
| IP00014808        | Platelet-activating factor acetylhydrolase IB gamma subunit                        | VVVLGLLR               | d; e                     |
| IP00334195        | Platelet-derived growth factor beta                                                | SHSGGELESLAR           | a                        |
| IP00384561        | PLCL4 protein                                                                      | AFGSQTDGR              | a                        |
| IP00384561        | PLCL4 protein                                                                      | GATRQK                 | a                        |
| IP00298219        | Pleckstrin homology domain containing, family K member 1                           | IEIMSPR                | d                        |
| IP00186711        | Plectin 1 isoform 6                                                                | AETEQQEQQR             | d                        |
| IP00186711        | Plectin 1 isoform 6                                                                | DKDNTQR                | c                        |
| IP00186711        | Plectin 1 isoform 6                                                                | EAAAATQK               | e                        |
| IP00186711        | Plectin 1 isoform 6                                                                | ELIPTEEAR              | d                        |
| IP00186711        | Plectin 1 isoform 6                                                                | FQLQLLEEQR             | c                        |
| IP00186711        | Plectin 1 isoform 6                                                                | FLEVQYLGGLEPDTGKR      | d                        |
| IP00186711        | Plectin 1 isoform 6                                                                | GFFDPNTEENLYQLMER      | d; e                     |
| IP00186711        | Plectin 1 isoform 6                                                                | IEEER                  | c                        |
| IP00186711        | Plectin 1 isoform 6                                                                | SIITYVSSLYDAMPR        | d                        |
| IP00420096        | Plectin 3                                                                          | GWTLPGGGTAALSPGAD      | a                        |
| IP00398777        | Plectin 8                                                                          | ALSAPRADAK             | a                        |
| IP00398777        | Plectin 8                                                                          | DDGTGQLLLPLSDARK       | a                        |
| IP00155729        | Plexin B3 precursor                                                                | GARAQAEYRSYVAR         | a                        |
| IP00155729        | Plexin B3 precursor                                                                | TEIMVEK                | a                        |
| IP00155729        | Plexin B3 precursor                                                                | YTANPQLVAEPSASFR       | a                        |
| IP00479337        | PLSS3001                                                                           | APVLLR                 | a                        |
| IP00235481        | PMFBP1 protein                                                                     | ALQAEVQK               | a                        |
| IP00235481        | PMFBP1 protein                                                                     | EFQEEMAALK             | a                        |
| IP00235481        | PMFBP1 protein                                                                     | IASLERSLNYRDK          | a                        |
| IP00235481        | PMFBP1 protein                                                                     | KRVEELSLSEALR          | a                        |
| IP00235481        | PMFBP1 protein                                                                     | NIMK                   | a                        |
| IP00016610        | Poly(rC)-binding protein 1                                                         | ESTGAQVQVAGDMPLNSTER   | e                        |
| IP00023097        | Polybromo-1                                                                        | KELGPLPDDDDMASPK       | a                        |
| IP00023097        | Polybromo-1                                                                        | LLHSEAYLK              | a                        |
| IP00023097        | Polybromo-1                                                                        | RLSAIFLRPSR            | a                        |
| IP00023097        | Polybromo-1                                                                        | SDYNK                  | a                        |
| IP00023097        | Polybromo-1                                                                        | SSLRMRTPSNLAAR         | a                        |
| IP00152661        | Polycystic kidney disease 1-like 1 protein                                         | AFPVALLR               | a                        |
| IP00152661        | Polycystic kidney disease 1-like 1 protein                                         | ALLAQGGQSGFPVIDKGV     | a                        |
| IP00152661        | Polycystic kidney disease 1-like 1 protein                                         | AWSSGGPR               | a                        |
| IP00152661        | Polycystic kidney disease 1-like 1 protein                                         | VGLLCTLLASPGAQLSL      | a                        |
| IP00152661        | Polycystic kidney disease 1-like 1 protein                                         | VHGNDCLEDGLYNSSLK      | a                        |
| IP00099981        | Polycystic kidney disease-associated                                               | DVSHNLR                | a                        |
| IP00005401        | Polypeptide                                                                        | CPVMAGGLFSIDK          | a                        |
| IP00005401        | Polypeptide                                                                        | GTQVVKISVHMGR          | a                        |
| IP00005401        | Polypeptide                                                                        | KTEESVLK               | a                        |
| IP00060715        | Potassium channel tetramerisation domain-containing protein 12                     | DLQLVLPDYFPER          | d; e                     |
| IP00060715        | Potassium channel tetramerisation domain-containing protein 12                     | EAEYFELPVR             | e                        |
| IP00060715        | Potassium channel tetramerisation domain-containing protein 12                     | LGAPQPGFGPPPSR         | c; d; e                  |
| IP00645064        | Potassium large conductance calcium-activated channel, subfamily M, alpha member 1 | XGGGGGGGSSLR           | c                        |
| IP00017521        | Potassium voltage-gated channel                                                    | AEERGERCSNPK           | a                        |



| IPI Accession No. | Protein Description                                                            | Peptide Sequence*            | Primary Source Dataset** |
|-------------------|--------------------------------------------------------------------------------|------------------------------|--------------------------|
| IP100017521       | Potassium voltage-gated channel                                                | LARHSLGLR                    | a                        |
| IP100163724       | Potassium/sodium                                                               | GLQLSANM                     | a                        |
| IP100031506       | Potassium/sodium                                                               | GVPPAPPPAAALPR               | a                        |
| IP100023164       | Potassium/sodium                                                               | SSTNGDCRR                    | a                        |
| IP100031506       | Potassium/sodium hyperpolarization-activated cyclic nucleotide-gated channel 1 | VDGGGGGGGGGGGEEPPAGGFEDAEGPR | e                        |
| IP100218946       | Potassium/sodium hyperpolarization-activated cyclic nucleotide-gated channel 2 | AEALPPEAADEGGPR              | e                        |
| IP100218946       | Potassium/sodium hyperpolarization-activated cyclic nucleotide-gated channel 2 | GAASGPAGPGPAEAGSEAGPAGEPR    | e                        |
| IP100218919       | Potassium-transporting ATPase alpha chain 1                                    | AGGGGGK                      | c                        |
| IP100028951       | Potential phospholipid-transporting                                            | LGSSPSTPSSDGMILLR            | a                        |
| IP100028951       | Potential phospholipid-transporting                                            | LTFELLHLTIGFDSVR             | a                        |
| IP100028951       | Potential phospholipid-transporting                                            | MEREPAETEEPPGRR              | a                        |
| IP100028951       | Potential phospholipid-transporting                                            | SGLQGPDRH                    | a                        |
| IP100383182       | PP3895                                                                         | AENYDPSADR                   | d                        |
| IP100410126       | PPP1R2P3 protein                                                               | IQEESSEEDSDLSPEER            | d; e                     |
| IP100419307       | PPP2R1A protein                                                                | KLSTIALALGVER                | a                        |
| IP100419307       | PPP2R1A protein                                                                | NLCSDDTPMVR                  | a                        |
| IP100479976       | PR domain containing 16                                                        | VFTDPSNLQRHR                 | a                        |
| IP100479976       | PR domain containing 16                                                        | YTCRYCGKIEPR                 | a                        |
| IP100007426       | PRA1 family protein 3                                                          | AWDDFFPGSDR                  | d; e                     |
| IP100007426       | PRA1 family protein 3                                                          | TPMGIVLDALEQQEGINR           | d                        |
| IP100335147       | PRAM-1 protein                                                                 | MAHHLPAAMENHQDFRS            | a                        |
| IP100335147       | PRAM-1 protein                                                                 | RDSSAFK                      | a                        |
| IP100025702       | PR-domain zinc finger protein 15                                               | EKGXGCSICNRR                 | a                        |
| IP100025702       | PR-domain zinc finger protein 15                                               | GXGCSICNR                    | a                        |
| IP100025702       | PR-domain zinc finger protein 15                                               | LLGMSGVEGVWNQHSR             | a                        |
| IP100332106       | Pre-B-cell leukemia transcription factor interacting protein 1                 | ELPLSPAFFGEGDIFR             | e                        |
| IP100298883       | PREDICTED: 5-azacytidine induced 1                                             | AEFKGR                       | a                        |
| IP100298883       | PREDICTED: 5-azacytidine induced 1                                             | SNLAQVIRQEFDR                | a                        |
| IP100298883       | PREDICTED: 5-azacytidine induced 1                                             | SSSALDSPAGPR                 | a                        |
| IP100298883       | PREDICTED: 5-azacytidine induced 1                                             | VATPRQR                      | a                        |
| IP100294840       | PREDICTED: absent in melanoma 1                                                | GRSRALEAVPAPPASGP            | a                        |
| IP100294840       | PREDICTED: absent in melanoma 1                                                | NSRNGLESPTR                  | a                        |
| IP100294840       | PREDICTED: absent in melanoma 1                                                | SQPPK                        | a                        |
| IP100455219       | PREDICTED: AT rich interactive domain                                          | DCHPKACR                     | a                        |
| IP100455219       | PREDICTED: AT rich interactive domain                                          | ESENSSFPSHR                  | a                        |
| IP100455219       | PREDICTED: AT rich interactive domain                                          | GQSLPGTFLGGR                 | a                        |
| IP100455219       | PREDICTED: AT rich interactive domain                                          | HELLVSLGRLTIGVR              | a                        |
| IP100455219       | PREDICTED: AT rich interactive domain                                          | VAEAEAGEKGTPLPSA             | a                        |
| IP100398992       | PREDICTED: chromodomain helicase                                               | CCNHPYLINGAEK                | a                        |
| IP100398992       | PREDICTED: chromodomain helicase                                               | DFGDLKTEEQVQK                | a                        |
| IP100398992       | PREDICTED: chromodomain helicase                                               | NAQQQPAK                     | a                        |
| IP100398992       | PREDICTED: chromodomain helicase                                               | YYRAILEK                     | a                        |
| IP100400873       | PREDICTED: chromosome 10 open                                                  | DPNCLLPEK                    | a                        |
| IP100400873       | PREDICTED: chromosome 10 open                                                  | DVPVPTNAKR                   | a                        |
| IP100400873       | PREDICTED: chromosome 10 open                                                  | EKHGK                        | a                        |
| IP100400873       | PREDICTED: chromosome 10 open                                                  | QQTSPK                       | a                        |
| IP100400873       | PREDICTED: chromosome 10 open                                                  | TMVMEALSIAK                  | a                        |
| IP100329192       | PREDICTED: chromosome 14 open                                                  | DVYKAAR                      | a                        |
| IP100329192       | PREDICTED: chromosome 14 open                                                  | SFVSHCGDLLTEEVTR             | a                        |
| IP100455733       | PREDICTED: chromosome 6 open                                                   | KSSSTSDNFK                   | a                        |
| IP100455733       | PREDICTED: chromosome 6 open                                                   | LDSADGFHSLPRSGAR             | a                        |
| IP100455733       | PREDICTED: chromosome 6 open                                                   | SGSSPSPQSCDLEEPW             | a                        |
| IP100455073       | PREDICTED: CTAGE family, member 6                                              | IMTEFYQDEMIK                 | a                        |
| IP100455073       | PREDICTED: CTAGE family, member 6                                              | IMTEFYQDEMIKLYR              | a                        |
| IP100333770       | PREDICTED: dedicator of cytokinesis 10                                         | DMSQSPSTNFIRSK               | a                        |
| IP100333770       | PREDICTED: dedicator of cytokinesis 10                                         | ILSPTQMFILRCNR               | a                        |
| IP100333770       | PREDICTED: dedicator of cytokinesis 10                                         | IRTVLMATAQNIKEHEK            | a                        |
| IP100333770       | PREDICTED: dedicator of cytokinesis 10                                         | IYLK                         | a                        |
| IP100333770       | PREDICTED: dedicator of cytokinesis 10                                         | LQGSVSVKYNAGPMAYA            | a                        |
| IP100333770       | PREDICTED: dedicator of cytokinesis 10                                         | MAGERTR                      | a                        |
| IP100333770       | PREDICTED: dedicator of cytokinesis 10                                         | NSNFFAEVKDLTK                | a                        |
| IP100333770       | PREDICTED: dedicator of cytokinesis 10                                         | TLHMQEKPR                    | a                        |
| IP100333770       | PREDICTED: dedicator of cytokinesis 10                                         | VSAARPPR                     | a                        |
| IP100241886       | PREDICTED: dendrin                                                             | MLDGPLFSEGGPDSR              | a                        |
| IP100241886       | PREDICTED: dendrin                                                             | TPGYPAGALREAVSR              | a                        |
| IP100216142       | PREDICTED: DNA2 DNA replication                                                | CLFCLQFAIPASR                | a                        |
| IP100216142       | PREDICTED: DNA2 DNA replication                                                | GRGQSPAAQVRGPTWV             | a                        |
| IP100216142       | PREDICTED: DNA2 DNA replication                                                | IINDLLAR                     | a                        |
| IP100216142       | PREDICTED: DNA2 DNA replication                                                | VANAVINLR                    | a                        |
| IP100216142       | PREDICTED: DNA2 DNA replication                                                | VPAPQVEKGGVSNVTE             | a                        |
| IP100171494       | PREDICTED: dynein, cytoplasmic, heavy                                          | AEDLFR                       | a                        |
| IP100171494       | PREDICTED: dynein, cytoplasmic, heavy                                          | ALAIQNWVDK                   | a                        |
| IP100171494       | PREDICTED: dynein, cytoplasmic, heavy                                          | AYGATPSR                     | a                        |
| IP100171494       | PREDICTED: dynein, cytoplasmic, heavy                                          | DIVNQVGDNR                   | a                        |
| IP100171494       | PREDICTED: dynein, cytoplasmic, heavy                                          | GTTLLSSEVQK                  | a                        |
| IP100171494       | PREDICTED: dynein, cytoplasmic, heavy                                          | LMGFIDTISWVSMK               | a                        |
| IP100171494       | PREDICTED: dynein, cytoplasmic, heavy                                          | NLSEVNSIVVWR                 | a                        |
| IP100171494       | PREDICTED: dynein, cytoplasmic, heavy                                          | NYISEIQDPSQQLLQAFI           | a                        |
| IP100171494       | PREDICTED: dynein, cytoplasmic, heavy                                          | QVFAPMLLK                    | a                        |
| IP100171494       | PREDICTED: dynein, cytoplasmic, heavy                                          | SITAGSKFDR                   | a                        |
| IP100171494       | PREDICTED: dynein, cytoplasmic, heavy                                          | VEEHSVMTYK                   | a                        |
| IP100171494       | PREDICTED: dynein, cytoplasmic, heavy                                          | VLSFPQGSLLAGR                | a                        |
| IP100171494       | PREDICTED: dynein, cytoplasmic, heavy                                          | VVVLNMDILLR                  | a                        |
| IP100171494       | PREDICTED: dynein, cytoplasmic, heavy                                          | YVRGEHLSPDHWLDFLR            | a                        |
| IP100171494       | PREDICTED: dynein, cytoplasmic, heavy                                          | EALTGKMPK                    | a                        |
| IP100217948       | PREDICTED: FERM domain containing                                              | DQATVDVRSVDRFTFR             | a                        |
| IP100240988       | PREDICTED: FLJ00133 protein                                                    | EATDPAMLR                    | a                        |
| IP100240988       | PREDICTED: FLJ00133 protein                                                    | YKCDPPGFSGR                  | a                        |
| IP100240988       | PREDICTED: FLJ00133 protein                                                    | ASTLTIGWRAQEMSEK             | a                        |
| IP100165319       | PREDICTED: FLJ46675 protein                                                    | DLEFEEDQR                    | a                        |
| IP100165319       | PREDICTED: FLJ46675 protein                                                    | DVLEK                        | a                        |
| IP100165319       | PREDICTED: FLJ46675 protein                                                    | MFEKLINK                     | a                        |
| IP100165319       | PREDICTED: FLJ46675 protein                                                    | MMEDALR                      | a                        |
| IP100165319       | PREDICTED: FLJ46675 protein                                                    | NCHLALR                      | a                        |
| IP100165319       | PREDICTED: FLJ46675 protein                                                    | VGRNGGEAEK                   | a                        |
| IP100176482       | PREDICTED: G2 protein                                                          | GFLNFMNTVLVAFTK              | a                        |
| IP100176482       | PREDICTED: G2 protein                                                          | LLPISPTVPTVEVR               | a                        |

| IPI Accession No. | Protein Description                         | Peptide Sequence*  | Primary Source Dataset** |
|-------------------|---------------------------------------------|--------------------|--------------------------|
| IP00011932        | PREDICTED: heat shock protein 12A           | RGDTYK             | a                        |
| IP00011932        | PREDICTED: heat shock protein 12A           | SLVCLGPAR          | a                        |
| IP00011932        | PREDICTED: heat shock protein 12A           | YVVVDSGGGTVDLTVHQI | a                        |
| IP00011932        | PREDICTED: heat shock protein 12A isoform 1 | ELSDQAGSEFENSIVR   | cr; d; e                 |
| IP00011932        | PREDICTED: heat shock protein 12A isoform 1 | ETAPTSAYSSPAR      | cr; d; e                 |
| IP00011932        | PREDICTED: heat shock protein 12A isoform 1 | IFGDFHEQFK         | d; e                     |
| IP00011932        | PREDICTED: heat shock protein 12A isoform 1 | HIIPQDVGLTILK      | d; e                     |
| IP00011932        | PREDICTED: heat shock protein 12A isoform 1 | LDLTGTSGTAVPAR     | d; e                     |
| IP00011932        | PREDICTED: heat shock protein 12A isoform 1 | QWLYLEK            | e                        |
| IP00011932        | PREDICTED: heat shock protein 12A isoform 1 | SPLTYGVGVLR        | e                        |
| IP00011932        | PREDICTED: heat shock protein 12A isoform 1 | TNPLNTLPPSFIDYIK   | e                        |
| IP00011932        | PREDICTED: heat shock protein 12A isoform 1 | WCTDYFDK           | e                        |
| IP00011932        | PREDICTED: heat shock protein 12A isoform 1 | WEGGDPGVSNQK       | e                        |
| IP00335009        | PREDICTED: hemicentin-2                     | ARLSDSGMYTCEALNAA  | a                        |
| IP00335009        | PREDICTED: hemicentin-2                     | VASQPWRAAGR        | a                        |
| IP00335009        | PREDICTED: hemicentin-2                     | VLTLASARSDSGRYSC   | a                        |
| IP00335009        | PREDICTED: hemicentin-2                     | VPLDPRSPR          | a                        |
| IP00398418        | PREDICTED: hypothetical protein             | AEQIRRRR           | a                        |
| IP00398418        | PREDICTED: hypothetical protein             | AERAAAR            | a                        |
| IP00397820        | PREDICTED: hypothetical protein             | AESLSSVSRRLHAGKDG  | a                        |
| IP00456511        | PREDICTED: hypothetical protein             | AGAGREAGAQAR       | a                        |
| IP00456511        | PREDICTED: hypothetical protein             | AGGGGGGALLSR       | a                        |
| IP00456511        | PREDICTED: hypothetical protein             | AIQGSILERSRAGAGR   | a                        |
| IP00455081        | PREDICTED: hypothetical protein             | ALAALAR            | a                        |
| IP00455081        | PREDICTED: hypothetical protein             | ALAEAAAAYRTR       | a                        |
| IP00398556        | PREDICTED: hypothetical protein             | ALLRTQNGGHSR       | a                        |
| IP00374440        | PREDICTED: hypothetical protein             | ALPPPTSPRRQTCR     | a                        |
| IP00398556        | PREDICTED: hypothetical protein             | ALSAPAGLGILCPTR    | a                        |
| IP00398556        | PREDICTED: hypothetical protein             | ALWGFAR            | a                        |
| IP00401026        | PREDICTED: hypothetical protein             | ANMSIEK            | a                        |
| IP00398556        | PREDICTED: hypothetical protein             | APVTRAAQPSR        | a                        |
| IP00397890        | PREDICTED: hypothetical protein             | AQTALQQHLHHK       | a                        |
| IP00216817        | PREDICTED: hypothetical protein             | ASQYSRSR           | a                        |
| IP00216817        | PREDICTED: hypothetical protein             | ASQYSRSRSIPR       | a                        |
| IP00455081        | PREDICTED: hypothetical protein             | ATAEPRTHAAHERLLAR  | a                        |
| IP00217264        | PREDICTED: hypothetical protein             | AVMFMSTMK          | a                        |
| IP00398012        | PREDICTED: hypothetical protein             | AVRFETGLIEELSNR    | a                        |
| IP00454823        | PREDICTED: hypothetical protein             | AVRGQSPAPPR        | a                        |
| IP00216817        | PREDICTED: hypothetical protein             | AWEDK              | a                        |
| IP00401026        | PREDICTED: hypothetical protein             | DAEGDIGK           | a                        |
| IP00401026        | PREDICTED: hypothetical protein             | DAEGDIGKAEVMPVR    | a                        |
| IP00401026        | PREDICTED: hypothetical protein             | DCSSILSQDFNR       | a                        |
| IP00398012        | PREDICTED: hypothetical protein             | DDSLSSTSEISEK      | a                        |
| IP00216817        | PREDICTED: hypothetical protein             | DHPWR              | a                        |
| IP00398628        | PREDICTED: hypothetical protein             | DPPFLAAPAR         | a                        |
| IP00456066        | PREDICTED: hypothetical protein             | DWREAVVGNWR        | a                        |
| IP00455081        | PREDICTED: hypothetical protein             | EAAAAVGAEGLLAR     | a                        |
| IP00464965        | PREDICTED: hypothetical protein             | EAGAGARLSGLSGGLASS | a                        |
| IP00147381        | PREDICTED: hypothetical protein             | EDLVERIR           | a                        |
| IP00217264        | PREDICTED: hypothetical protein             | EEMQQR             | a                        |
| IP00397090        | PREDICTED: hypothetical protein             | EGKLPK             | a                        |
| IP00455081        | PREDICTED: hypothetical protein             | EGPVALQAALLSAPGPS  | a                        |
| IP00398418        | PREDICTED: hypothetical protein             | ELRWPPR            | a                        |
| IP00216817        | PREDICTED: hypothetical protein             | EPSIPR             | a                        |
| IP00217142        | PREDICTED: hypothetical protein             | EREAEAGAWAR        | a                        |
| IP00397090        | PREDICTED: hypothetical protein             | ESGDK              | a                        |
| IP00454884        | PREDICTED: hypothetical protein             | ESRIGGGAGGQRR      | a                        |
| IP00175083        | PREDICTED: hypothetical protein             | EYPRK              | a                        |
| IP00397890        | PREDICTED: hypothetical protein             | FRLAGDNPK          | a                        |
| IP00398012        | PREDICTED: hypothetical protein             | FITELPNHR          | a                        |
| IP00455115        | PREDICTED: hypothetical protein             | GALEGGPGAKLR       | a                        |
| IP00374504        | PREDICTED: hypothetical protein             | GDCVCTRRTMPGLR     | a                        |
| IP00456066        | PREDICTED: hypothetical protein             | GERGGDGR           | a                        |
| IP00398628        | PREDICTED: hypothetical protein             | GLGRPSHTQRAFNR     | a                        |
| IP00455115        | PREDICTED: hypothetical protein             | GLPEISLRDFARAR     | a                        |
| IP00455115        | PREDICTED: hypothetical protein             | GRIWGPR            | a                        |
| IP00374440        | PREDICTED: hypothetical protein             | GRKALPPPTSPR       | a                        |
| IP00454937        | PREDICTED: hypothetical protein             | GSEDK              | a                        |
| IP00454937        | PREDICTED: hypothetical protein             | GTNAALGFHAPR       | a                        |
| IP00217264        | PREDICTED: hypothetical protein             | GVKAANVLLSEHCVEK   | a                        |
| IP00398418        | PREDICTED: hypothetical protein             | GVPDRDK            | a                        |
| IP00217264        | PREDICTED: hypothetical protein             | GWLDQEDQEAPLQK     | a                        |
| IP00398556        | PREDICTED: hypothetical protein             | GWLLAGTLRR         | a                        |
| IP00454823        | PREDICTED: hypothetical protein             | IAAHGRR            | a                        |
| IP00401026        | PREDICTED: hypothetical protein             | IGESDRQPK          | a                        |
| IP00398348        | PREDICTED: hypothetical protein             | IPPGTLR            | a                        |
| IP00397820        | PREDICTED: hypothetical protein             | ISELLQGGAGAR       | a                        |
| IP00455115        | PREDICTED: hypothetical protein             | IWGPBRSRFR         | a                        |
| IP00217264        | PREDICTED: hypothetical protein             | KQDVVNRVATHSSNIR   | a                        |
| IP00454937        | PREDICTED: hypothetical protein             | KTGMQAPSASR        | a                        |
| IP00401026        | PREDICTED: hypothetical protein             | LDFRSHDKIPHR       | a                        |
| IP00455081        | PREDICTED: hypothetical protein             | LPAGQER            | a                        |
| IP00397890        | PREDICTED: hypothetical protein             | LPEPAKSCR          | a                        |
| IP00397820        | PREDICTED: hypothetical protein             | LPLRAVSGR          | a                        |
| IP00397820        | PREDICTED: hypothetical protein             | LPLRAVSGRISSELLQGA | a                        |
| IP00464965        | PREDICTED: hypothetical protein             | LSGLSGLASSGR       | a                        |
| IP00464965        | PREDICTED: hypothetical protein             | LSKDNAGAR          | a                        |
| IP00398012        | PREDICTED: hypothetical protein             | LSVGSNRDR          | a                        |
| IP00454823        | PREDICTED: hypothetical protein             | LVSASAFRPAALGR     | a                        |
| IP00217142        | PREDICTED: hypothetical protein             | LWLAQEAAGTLGRDARPR | a                        |
| IP00374982        | PREDICTED: hypothetical protein             | MDEIVKITSTER       | a                        |
| IP00456515        | PREDICTED: hypothetical protein             | MFLRHYR            | a                        |
| IP00401026        | PREDICTED: hypothetical protein             | MKDTEGDIGK         | a                        |
| IP00398012        | PREDICTED: hypothetical protein             | MNHADATIDLLFTKNR   | a                        |
| IP00456066        | PREDICTED: hypothetical protein             | MPGALLDDIPKSR      | a                        |
| IP00374813        | PREDICTED: hypothetical protein             | MPKARECPVDR        | a                        |
| IP00398012        | PREDICTED: hypothetical protein             | MQPSSGSLRSNAGAEK   | a                        |

| IPI Accession No. | Protein Description                                 | Peptide Sequence*  | Primary Source Dataset** |
|-------------------|-----------------------------------------------------|--------------------|--------------------------|
| IP00397090        | PREDICTED: hypothetical protein                     | MSARLSSADRAGSTR    | a                        |
| IP00147381        | PREDICTED: hypothetical protein                     | NALQVRV            | a                        |
| IP00455381        | PREDICTED: hypothetical protein                     | NLVFLAGIAYSK       | a                        |
| IP00399181        | PREDICTED: hypothetical protein                     | NNLSRRRPRASR       | a                        |
| IP00398012        | PREDICTED: hypothetical protein                     | NSLGRSERR          | a                        |
| IP00454937        | PREDICTED: hypothetical protein                     | QCRYLITHPERR       | a                        |
| IP00046460        | PREDICTED: hypothetical protein                     | QNALYEIEMR         | a                        |
| IP00398628        | PREDICTED: hypothetical protein                     | QPGQKDR            | a                        |
| IP00456134        | PREDICTED: hypothetical protein                     | QRAVSSSR           | a                        |
| IP00397820        | PREDICTED: hypothetical protein                     | REEEVK             | a                        |
| IP00455381        | PREDICTED: hypothetical protein                     | RFSTLTRHK          | a                        |
| IP00455115        | PREDICTED: hypothetical protein                     | RGLEISLR           | a                        |
| IP00456515        | PREDICTED: hypothetical protein                     | RLAASDPSRR         | a                        |
| IP00217264        | PREDICTED: hypothetical protein                     | RMTSHTTK           | a                        |
| IP00217142        | PREDICTED: hypothetical protein                     | RSLGVAVVYQPPVDAK   | a                        |
| IP00398348        | PREDICTED: hypothetical protein                     | RTPPQCP            | a                        |
| IP00401828        | PREDICTED: hypothetical protein                     | SEAVSPLQIRDSR      | a                        |
| IP00455115        | PREDICTED: hypothetical protein                     | SGREASEALGRWNPR    | a                        |
| IP00217264        | PREDICTED: hypothetical protein                     | SGRGTQGAILPGSQVR   | a                        |
| IP00216817        | PREDICTED: hypothetical protein                     | SIAVSIPR           | a                        |
| IP00217142        | PREDICTED: hypothetical protein                     | SLGYAVVYQPPVDAKR   | a                        |
| IP00217142        | PREDICTED: hypothetical protein                     | SPAAATGGTK         | a                        |
| IP00398012        | PREDICTED: hypothetical protein                     | SPASIRSR           | a                        |
| IP00456096        | PREDICTED: hypothetical protein                     | SPLCGIR            | a                        |
| IP00456096        | PREDICTED: hypothetical protein                     | SPLCGIRR           | a                        |
| IP00398012        | PREDICTED: hypothetical protein                     | SQALYSQRGLK        | a                        |
| IP00397890        | PREDICTED: hypothetical protein                     | SRPREAQLFPPVR      | a                        |
| IP00456680        | PREDICTED: hypothetical protein                     | SSAPREMQR          | a                        |
| IP00399181        | PREDICTED: hypothetical protein                     | SSSGVSCCTADFLQQRK  | a                        |
| IP00216817        | PREDICTED: hypothetical protein                     | STPSLDLSPGLWAR     | a                        |
| IP00398012        | PREDICTED: hypothetical protein                     | TESQDPTSSWR        | a                        |
| IP00456515        | PREDICTED: hypothetical protein                     | TPGGAASEK          | a                        |
| IP00398012        | PREDICTED: hypothetical protein                     | TQSKIER            | a                        |
| IP00455081        | PREDICTED: hypothetical protein                     | TRVGSAGVLR         | a                        |
| IP00398012        | PREDICTED: hypothetical protein                     | TSDRVSSPSTSSRPPID  | a                        |
| IP00398012        | PREDICTED: hypothetical protein                     | TVKPKWR            | a                        |
| IP00217142        | PREDICTED: hypothetical protein                     | TVTSPRLR           | a                        |
| IP00297381        | PREDICTED: hypothetical protein                     | TWGGPGTPPTPSGTGR   | a                        |
| IP00401026        | PREDICTED: hypothetical protein                     | VELVSNTK           | a                        |
| IP00454937        | PREDICTED: hypothetical protein                     | VKEVRRGCAR         | a                        |
| IP00398012        | PREDICTED: hypothetical protein                     | WDFQVMISR          | a                        |
| IP00455381        | PREDICTED: hypothetical protein                     | WIPGAER            | a                        |
| IP00175083        | PREDICTED: hypothetical protein                     | WPYLSRPR           | a                        |
| IP00446965        | PREDICTED: hypothetical protein                     | YRTRSPAQAEPHR      | a                        |
| IP00414898        | PREDICTED: hypothetical protein LOC23349            | ALSEEQEQAAR        | e                        |
| IP00414898        | PREDICTED: hypothetical protein LOC23349            | EAEAGTSVVESSAGR    | d; e                     |
| IP00740480        | PREDICTED: hypothetical protein LOC258010 isoform 3 | QIATSGPPEGLR       | e                        |
| IP00741068        | PREDICTED: hypothetical protein LOC26049 isoform 1  | TSVSTHTRSGNLK      | d                        |
| IP00412225        | PREDICTED: hypothetical protein XP_376444           | MLEENEK            | c                        |
| IP00181706        | PREDICTED: hypothetical protein XP_934560           | TSPATNQAAQGEK      | c                        |
| IP00738593        | PREDICTED: hypothetical protein XP_946401           | DNNERIAR           | c                        |
| IP00373894        | PREDICTED: KIAA0100 gene product                    | RGVPTSASAPR        | a                        |
| IP00373894        | PREDICTED: KIAA0100 gene product                    | SPSPSSR            | a                        |
| IP0037611         | PREDICTED: KIAA0303 protein                         | DRALSVTATVGETK     | a                        |
| IP0037611         | PREDICTED: KIAA0303 protein                         | EQPLQRHPSSPPPPLTA  | a                        |
| IP0037611         | PREDICTED: KIAA0303 protein                         | GGWVGADAGLGRPP     | a                        |
| IP0037611         | PREDICTED: KIAA0303 protein                         | ILIVIARPAR         | a                        |
| IP0037611         | PREDICTED: KIAA0303 protein                         | NDTTSARELSPSLK     | a                        |
| IP0037611         | PREDICTED: KIAA0303 protein                         | QGGGDFR            | a                        |
| IP0037611         | PREDICTED: KIAA0303 protein                         | SLIGNGQSPALPRPHSPL | a                        |
| IP0037611         | PREDICTED: KIAA0303 protein                         | SPSQPAANTDR        | a                        |
| IP00219314        | PREDICTED: KIAA0310                                 | DPYGEVDRR          | a                        |
| IP00219314        | PREDICTED: KIAA0310                                 | KTTLKLVIGSNHSLPFLK | a                        |
| IP00307684        | PREDICTED: KIAA0342 gene product                    | KLDDLIVK           | a                        |
| IP00004557        | PREDICTED: KIAA0367 protein                         | DMSSFMLPGSSHITDSE  | a                        |
| IP00004557        | PREDICTED: KIAA0367 protein                         | MPGLGWMK           | a                        |
| IP00004557        | PREDICTED: KIAA0367 protein                         | NLDVK              | a                        |
| IP00479081        | PREDICTED: KIAA0476 gene product                    | DAPVPGGPGVLSDR     | a                        |
| IP00479081        | PREDICTED: KIAA0476 gene product                    | DPASPPGR           | a                        |
| IP00479081        | PREDICTED: KIAA0476 gene product                    | QTTWAGRSLRDPASPPG  | a                        |
| IP00456832        | PREDICTED: KIAA0515                                 | DEDEENDASLANSSTTL  | a                        |
| IP00456832        | PREDICTED: KIAA0515                                 | SSMGSFMR           | a                        |
| IP00456832        | PREDICTED: KIAA0515                                 | SVDAIRSSVIPRHGLQSL | a                        |
| IP00456832        | PREDICTED: KIAA0515                                 | WMMMPYMDPRHPTPR    | a                        |
| IP00158296        | PREDICTED: KIAA0564 protein                         | LKEELQLSDEQLQRK    | a                        |
| IP00158296        | PREDICTED: KIAA0564 protein                         | LLLLGAPGGHGGPASRR  | a                        |
| IP00158296        | PREDICTED: KIAA0564 protein                         | RAAREMGQR          | a                        |
| IP00158296        | PREDICTED: KIAA0564 protein                         | SRFQAR             | a                        |
| IP00456265        | PREDICTED: KIAA0657 protein                         | AGSQAAGR           | a                        |
| IP00456265        | PREDICTED: KIAA0657 protein                         | ARMCVSK            | a                        |
| IP00456265        | PREDICTED: KIAA0657 protein                         | ESSGPR             | a                        |
| IP00456265        | PREDICTED: KIAA0657 protein                         | MCVSK              | a                        |
| IP00456265        | PREDICTED: KIAA0657 protein                         | YEQIEEIVR          | a                        |
| IP00304809        | PREDICTED: KIAA0774                                 | EELERR             | a                        |
| IP00304809        | PREDICTED: KIAA0774                                 | ELEENFEK           | a                        |
| IP00304809        | PREDICTED: KIAA0774                                 | GTDSLQTR           | a                        |
| IP00304809        | PREDICTED: KIAA0774                                 | RDAEIPRHVPK        | a                        |
| IP00304809        | PREDICTED: KIAA0774                                 | RFEELR             | a                        |
| IP00016356        | PREDICTED: KIAA0819 protein                         | LPCPAEGAELELR      | a                        |
| IP00016356        | PREDICTED: KIAA0819 protein                         | LVQEKNAVRYESELMI   | a                        |
| IP00016356        | PREDICTED: KIAA0819 protein                         | QLQVEERQR          | a                        |
| IP00016356        | PREDICTED: KIAA0819 protein                         | YESELMI            | a                        |
| IP00294148        | PREDICTED: KIAA0947 protein                         | EAAVQGGQKQR        | a                        |
| IP00294148        | PREDICTED: KIAA0947 protein                         | EVVYEFSTTK         | a                        |
| IP00294148        | PREDICTED: KIAA0947 protein                         | RASPPDPSPSAASAS    | a                        |
| IP00165459        | PREDICTED: KIAA1076 protein                         | EVEARPLSPER        | a                        |
| IP00165459        | PREDICTED: KIAA1076 protein                         | GATAEALSVFNCQMR    | a                        |

| IPI Accession No. | Protein Description                  | Peptide Sequence* | Primary Source Dataset** |
|-------------------|--------------------------------------|-------------------|--------------------------|
| IP00165459        | PREDICTED: KIAA1076 protein          | MDELQPR           | a                        |
| IP00165459        | PREDICTED: KIAA1076 protein          | QHINVNEITYDYK     | a                        |
| IP00165459        | PREDICTED: KIAA1076 protein          | QVIADMR           | a                        |
| IP00165459        | PREDICTED: KIAA1076 protein          | QVTFAK            | a                        |
| IP00385511        | PREDICTED: KIAA1093 protein          | GGWEDCK           | a                        |
| IP00385511        | PREDICTED: KIAA1093 protein          | SPAWNETGR         | a                        |
| IP00385511        | PREDICTED: KIAA1093 protein          | VAVPNGQPPSAARYMPK | a                        |
| IP00298902        | PREDICTED: KIAA1107 protein          | EMGFTCK           | a                        |
| IP00298902        | PREDICTED: KIAA1107 protein          | KATGKDSPLCIAGPSSK | a                        |
| IP00298902        | PREDICTED: KIAA1107 protein          | LDHNTTEK          | a                        |
| IP00298902        | PREDICTED: KIAA1107 protein          | LENMSPR           | a                        |
| IP00377104        | PREDICTED: KIAA1240 protein          | ENTLFDIHR         | a                        |
| IP00377104        | PREDICTED: KIAA1240 protein          | TPEESCAQIFR       | a                        |
| IP00377104        | PREDICTED: KIAA1240 protein          | WVGESER           | a                        |
| IP00165210        | PREDICTED: KIAA1272 protein          | DNENYSTKIPYMAAR   | a                        |
| IP00165210        | PREDICTED: KIAA1272 protein          | LQAYRLICAMMTRR    | a                        |
| IP00165210        | PREDICTED: KIAA1272 protein          | SSSPAELDLKDLQQTQ  | a                        |
| IP00165210        | PREDICTED: KIAA1272 protein          | SSSWGRTYSFTAMSR   | a                        |
| IP00002180        | PREDICTED: KIAA1383 protein          | HRRPRGALPQISR     | a                        |
| IP00002180        | PREDICTED: KIAA1383 protein          | SSLSPPSAGSPVHSYR  | a                        |
| IP00164719        | PREDICTED: KIAA1432                  | AFFAVLAAAR        | a                        |
| IP00164719        | PREDICTED: KIAA1432                  | TLSPMPSPSGK       | a                        |
| IP00164719        | PREDICTED: KIAA1432                  | TMYFLSGWPK        | a                        |
| IP00164719        | PREDICTED: KIAA1432                  | WDLCR             | a                        |
| IP00373913        | PREDICTED: KIAA1447 protein          | AEPGATPSRDALFNPSR | a                        |
| IP00373913        | PREDICTED: KIAA1447 protein          | ERQGLLGACR        | a                        |
| IP00373913        | PREDICTED: KIAA1447 protein          | GERRPGGFEALNPR    | a                        |
| IP00373913        | PREDICTED: KIAA1447 protein          | HKAGK             | a                        |
| IP00373913        | PREDICTED: KIAA1447 protein          | NNEGQSTADITSEVVA  | a                        |
| IP00373913        | PREDICTED: KIAA1447 protein          | SSCQGLLPSVAHRVAQ  | a                        |
| IP00373913        | PREDICTED: KIAA1447 protein          | VLNGEMGR          | a                        |
| IP00373913        | PREDICTED: KIAA1447 protein          | WNGNPTQR          | a                        |
| IP00375879        | PREDICTED: KIAA1467 protein          | AGACGGGGEGGGAA    | a                        |
| IP00375879        | PREDICTED: KIAA1467 protein          | KSAAXHRLPGFPR     | a                        |
| IP00375879        | PREDICTED: KIAA1467 protein          | RFLRIK            | a                        |
| IP000029170       | PREDICTED: KIAA1509                  | DPVSGRSGGVR       | a                        |
| IP000029170       | PREDICTED: KIAA1509                  | EASTPGR           | a                        |
| IP000029170       | PREDICTED: KIAA1509                  | EASTPGRNALGR      | a                        |
| IP000029170       | PREDICTED: KIAA1509                  | ELKTSLNNAQLELNWQ  | a                        |
| IP000029170       | PREDICTED: KIAA1509                  | ETENESLQR         | a                        |
| IP000029170       | PREDICTED: KIAA1509                  | SRPLDTR           | a                        |
| IP00001632        | PREDICTED: KIAA1522 protein          | DDTFVGR           | a                        |
| IP00001632        | PREDICTED: KIAA1522 protein          | EAPGTPRAPGAR      | a                        |
| IP00001632        | PREDICTED: KIAA1522 protein          | GTSGMGAR          | a                        |
| IP00176702        | PREDICTED: KIAA1543                  | ILEEIK            | a                        |
| IP00176702        | PREDICTED: KIAA1543                  | SSPSMHEALGK       | a                        |
| IP00176702        | PREDICTED: KIAA1543                  | VLTPPHDVSPLPHLRK  | a                        |
| IP00397930        | PREDICTED: KIAA1571 protein          | ASTPSMTNQCK       | a                        |
| IP00397930        | PREDICTED: KIAA1571 protein          | FICK              | a                        |
| IP00397930        | PREDICTED: KIAA1571 protein          | LLESQSK           | a                        |
| IP00397930        | PREDICTED: KIAA1571 protein          | MMTRLANK          | a                        |
| IP00397930        | PREDICTED: KIAA1571 protein          | SGIRAPPR          | a                        |
| IP00397930        | PREDICTED: KIAA1571 protein          | SYVSK             | a                        |
| IP00176581        | PREDICTED: KIAA1596                  | GACPAAEIK         | a                        |
| IP00176581        | PREDICTED: KIAA1596                  | IILPDSSEENNVNDK   | a                        |
| IP00176581        | PREDICTED: KIAA1596                  | VLFLTPQVMNLSLR    | a                        |
| IP00480078        | PREDICTED: KIAA1602 protein          | LAGALCPQVPR       | a                        |
| IP00480078        | PREDICTED: KIAA1602 protein          | VDLEPVSPR         | a                        |
| IP00288988        | PREDICTED: KIAA1614 protein          | LRDAGQGTFRH       | a                        |
| IP00288988        | PREDICTED: KIAA1614 protein          | TCELPPSQTPSRPQVR  | a                        |
| IP00288988        | PREDICTED: KIAA1614 protein          | TGSGSGGHVLSR      | a                        |
| IP00455851        | PREDICTED: KIAA1688 protein          | ASAESSPGR         | a                        |
| IP00455851        | PREDICTED: KIAA1688 protein          | LEWVEIIEPR        | a                        |
| IP00455851        | PREDICTED: KIAA1688 protein          | LIQMYMGDRR        | a                        |
| IP00455851        | PREDICTED: KIAA1688 protein          | TSLRWNSGAKER      | a                        |
| IP00400986        | PREDICTED: KIAA1731 protein          | ASFPEDR           | a                        |
| IP00400986        | PREDICTED: KIAA1731 protein          | DSLQARREAEVLYVHK  | a                        |
| IP00400986        | PREDICTED: KIAA1731 protein          | LAEEEEAK          | a                        |
| IP00400986        | PREDICTED: KIAA1731 protein          | LYNQLAEVK         | a                        |
| IP00400986        | PREDICTED: KIAA1731 protein          | NQNYPSEEHTLQNKK   | a                        |
| IP00400986        | PREDICTED: KIAA1731 protein          | YTEMKRR           | a                        |
| IP00064201        | PREDICTED: KIAA1817 protein          | GGRPQATQTPVPSLRGR | a                        |
| IP00064201        | PREDICTED: KIAA1817 protein          | KLPQSEGVQGER      | a                        |
| IP00064201        | PREDICTED: KIAA1817 protein          | QCVASPEAR         | a                        |
| IP00064201        | PREDICTED: KIAA1817 protein          | SSPVQGGQMSR       | a                        |
| IP00064201        | PREDICTED: KIAA1817 protein          | TTVKDVMLTQDRLSLR  | a                        |
| IP00306483        | PREDICTED: KIAA1836 protein          | ESPSPSVREQLALLEAR | a                        |
| IP00306483        | PREDICTED: KIAA1836 protein          | GQAPLPMAHIEK      | a                        |
| IP00186448        | PREDICTED: KIAA1856 protein          | AEEMEK            | a                        |
| IP00186448        | PREDICTED: KIAA1856 protein          | ALSPGLEESGLLLAR   | a                        |
| IP00186448        | PREDICTED: KIAA1856 protein          | LPGPLVDQER        | a                        |
| IP00186448        | PREDICTED: KIAA1856 protein          | LLGARLDRDQEK      | a                        |
| IP00186448        | PREDICTED: KIAA1856 protein          | RSQEMGGAER        | a                        |
| IP00173653        | PREDICTED: KIAA1937 protein          | ITOLK             | a                        |
| IP00173653        | PREDICTED: KIAA1937 protein          | LNETLAELETTK      | a                        |
| IP00173653        | PREDICTED: KIAA1937 protein          | MIMVEER           | a                        |
| IP00216992        | PREDICTED: KIAA2025 protein          | DVVAAGSEMMNVESKG  | a                        |
| IP00216992        | PREDICTED: KIAA2025 protein          | GASCTFAHSQEELEK   | a                        |
| IP00216992        | PREDICTED: KIAA2025 protein          | GLEAVSNR          | a                        |
| IP00397809        | PREDICTED: kinesin family member 21B | GSTSHDDFK         | a                        |
| IP00397809        | PREDICTED: kinesin family member 21B | RSNIK             | a                        |
| IP00397809        | PREDICTED: kinesin family member 21B | SLSRASAR          | a                        |
| IP00397809        | PREDICTED: kinesin family member 21B | VKAMQEAIDAINNR    | a                        |
| IP00166980        | PREDICTED: kinesin family member 26A | LPEAQVMLACAQR     | a                        |
| IP00140833        | PREDICTED: lemur tyrosine kinase 3   | GLNLECLEWEK       | a                        |
| IP00140833        | PREDICTED: lemur tyrosine kinase 3   | RTAALCGECALPGR    | a                        |
| IP00140833        | PREDICTED: lemur tyrosine kinase 3   | SPSVSEYIIR        | a                        |

| IPI Accession No. | Protein Description                                            | Peptide Sequence*   | Primary Source Dataset** |
|-------------------|----------------------------------------------------------------|---------------------|--------------------------|
| IP00140833        | PREDICTED: lemur tyrosine kinase 3                             | TAALGCECALPGRCAPR   | a                        |
| IP000455739       | PREDICTED: lunatic fringe homolog                              | MSPAVRR             | a                        |
| IP00163866        | PREDICTED: MAX dimerization protein 5                          | DLFEK               | a                        |
| IP00163866        | PREDICTED: MAX dimerization protein 5                          | DSSIEMLR            | a                        |
| IP00163866        | PREDICTED: MAX dimerization protein 5                          | KLEYTICETEPEQPVK    | a                        |
| IP00163866        | PREDICTED: MAX dimerization protein 5                          | LHGGKGLPFYAGLSFAG   | a                        |
| IP00163866        | PREDICTED: MAX dimerization protein 5                          | MEDISPVQTDALDSVRER  | a                        |
| IP00163866        | PREDICTED: MAX dimerization protein 5                          | VGSFIELASQR         | a                        |
| IP00735796        | PREDICTED: Melanoma associated gene isoform 4                  | AEEKP               | d                        |
| IP00028932        | PREDICTED: microtubule associated                              | GPEALVVMR           | a                        |
| IP00028932        | PREDICTED: microtubule associated                              | HSTPRPLDAGR         | a                        |
| IP00028932        | PREDICTED: microtubule associated                              | LSADIRLR            | a                        |
| IP00028932        | PREDICTED: microtubule associated                              | SLSPGRATGTFDNEIVMM  | a                        |
| IP00008392        | PREDICTED: novel C3HC4 type Zinc                               | LPGNCELGRGKQEGK     | a                        |
| IP00008392        | PREDICTED: novel C3HC4 type Zinc                               | NSYLEIGNCMEPTN      | a                        |
| IP00008392        | PREDICTED: novel C3HC4 type Zinc                               | RPRAGR              | a                        |
| IP000397715       | PREDICTED: NYD-SP11 protein                                    | AISNTEYPK           | a                        |
| IP000397715       | PREDICTED: NYD-SP11 protein                                    | AKNWILLGEPYK        | a                        |
| IP000397715       | PREDICTED: NYD-SP11 protein                                    | ELAWEGLK            | a                        |
| IP000397715       | PREDICTED: NYD-SP11 protein                                    | ILAMEESEIAK         | a                        |
| IP000397715       | PREDICTED: NYD-SP11 protein                                    | LGMFNKILAQVEEK      | a                        |
| IP000397715       | PREDICTED: NYD-SP11 protein                                    | LLLNDITNKS          | a                        |
| IP000397715       | PREDICTED: NYD-SP11 protein                                    | NCLIVLSDR           | a                        |
| IP000397715       | PREDICTED: NYD-SP11 protein                                    | QTLALMFQK           | a                        |
| IP000397715       | PREDICTED: NYD-SP11 protein                                    | RSTAGDGSWSR         | a                        |
| IP000397715       | PREDICTED: NYD-SP11 protein                                    | STAGDGSWSRDDLCRLM   | a                        |
| IP000397715       | PREDICTED: NYD-SP11 protein                                    | VINEETIPPVMEQPVTK   | a                        |
| IP000397715       | PREDICTED: NYD-SP11 protein                                    | VRAISNTEYPK         | a                        |
| IP000397715       | PREDICTED: NYD-SP11 protein                                    | AVEATLMSFK          | a                        |
| IP000398020       | PREDICTED: odz, odd Oz/ten-m homolog                           | EPAPFNLYMFK         | a                        |
| IP00182194        | PREDICTED: odz, odd Oz/ten-m homolog                           | HFDHGRK             | a                        |
| IP000398020       | PREDICTED: odz, odd Oz/ten-m homolog                           | IVSRMFDGK           | a                        |
| IP00182194        | PREDICTED: odz, odd Oz/ten-m homolog                           | MFIETPPRTAISKDLEK   | a                        |
| IP00182194        | PREDICTED: odz, odd Oz/ten-m homolog                           | QLLMFLMAVALPFR      | a                        |
| IP00182194        | PREDICTED: odz, odd Oz/ten-m homolog                           | SMVLLIQSORQYIFVDS   | a                        |
| IP000398020       | PREDICTED: odz, odd Oz/ten-m homolog                           | SPFLTQHTVWIPWNVFY   | a                        |
| IP000398020       | PREDICTED: odz, odd Oz/ten-m homolog                           | TDAYNQK             | a                        |
| IP000398020       | PREDICTED: odz, odd Oz/ten-m homolog                           | TTTPESDLGTLRLTSGRK  | a                        |
| IP00182194        | PREDICTED: odz, odd Oz/ten-m homolog                           | VHGRNLLSIDYDRNIR    | a                        |
| IP000738457       | PREDICTED: proline-rich synapse-associated protein 2 isoform 2 | SPSPPLSPASGPGGPAFGR | d; e                     |
| IP000736251       | PREDICTED: protein phosphatase 1H                              | GGVAGPSPSTPTTR      | d                        |
| IP00101969        | PREDICTED: Rho GTPase activating                               | EEENGGRGGSPFR       | a                        |
| IP00101969        | PREDICTED: Rho GTPase activating                               | GGDNLQDER           | a                        |
| IP00101969        | PREDICTED: Rho GTPase activating                               | LARGRPDGEAGR        | a                        |
| IP00101969        | PREDICTED: Rho GTPase activating                               | LKAPPGEAASSAPAECA   | a                        |
| IP00101969        | PREDICTED: Rho GTPase activating                               | LSPPAAPERPAADTR     | a                        |
| IP00101969        | PREDICTED: Rho GTPase activating                               | RPSFSSHILMPCDTLAR   | a                        |
| IP00101969        | PREDICTED: Rho GTPase activating                               | RSSWR               | a                        |
| IP00455803        | PREDICTED: Rho-guanine nucleotide                              | DAAPACK             | a                        |
| IP00455803        | PREDICTED: Rho-guanine nucleotide                              | HFFYSMKERR          | a                        |
| IP00455803        | PREDICTED: Rho-guanine nucleotide                              | LARLLVTQANR         | a                        |
| IP00455803        | PREDICTED: Rho-guanine nucleotide                              | WSPFSR              | a                        |
| IP00292975        | PREDICTED: RNA binding motif protein                           | DYDER               | a                        |
| IP00292975        | PREDICTED: RNA binding motif protein                           | LSQLQVEAARLGIPLVGR  | a                        |
| IP00292975        | PREDICTED: RNA binding motif protein                           | NVEHREK             | a                        |
| IP00292975        | PREDICTED: RNA binding motif protein                           | QGNNQNKPGFLR        | a                        |
| IP00292975        | PREDICTED: RNA binding motif protein                           | TMSSQGRK            | a                        |
| IP00479741        | PREDICTED: septin 8 isoform 1                                  | EFLSELQR            | c; d; e                  |
| IP00479741        | PREDICTED: septin 8 isoform 1                                  | ELEEETNAFNR         | c; d; e                  |
| IP00479741        | PREDICTED: septin 8 isoform 1                                  | FSNAEPEPR           | c; e                     |
| IP00297254        | PREDICTED: signal-induced                                      | AGAEQHSAGAIWR       | a                        |
| IP00297254        | PREDICTED: signal-induced                                      | EALREHNSPSPQDTDG    | a                        |
| IP00297254        | PREDICTED: signal-induced                                      | KLHMDNLGPEQERTDQ    | a                        |
| IP00297254        | PREDICTED: signal-induced                                      | MPKMGVR             | a                        |
| IP00053535        | PREDICTED: similar to                                          | AEEEGLPK            | a                        |
| IP00053535        | PREDICTED: similar to                                          | AHADGEPKSGVRR       | a                        |
| IP000454960       | PREDICTED: similar to                                          | AVWPIPSQPRPHYGLR    | a                        |
| IP00455491        | PREDICTED: similar to                                          | DDLSEFCREMK         | a                        |
| IP00402452        | PREDICTED: similar to                                          | DGPRAVEDQSRDLWAR    | a                        |
| IP00455678        | PREDICTED: similar to                                          | DGSLTVANLSVTTNQN    | a                        |
| IP00260488        | PREDICTED: similar to                                          | DKHC AVRTPR         | a                        |
| IP00397192        | PREDICTED: similar to                                          | EAAVPPVAASLQGLR     | a                        |
| IP00397198        | PREDICTED: similar to                                          | GFLSQRILFAR         | a                        |
| IP00053535        | PREDICTED: similar to                                          | GKELKLQEPAPGAR      | a                        |
| IP00454960        | PREDICTED: similar to                                          | GRRALR              | a                        |
| IP00397198        | PREDICTED: similar to                                          | GYELAHQHQGR         | a                        |
| IP00454902        | PREDICTED: similar to                                          | ISQTLSPR            | a                        |
| IP00454902        | PREDICTED: similar to                                          | ISQTPSPAR           | a                        |
| IP00397198        | PREDICTED: similar to                                          | LFDPIRRSFLLSAAAAFL  | a                        |
| IP00454722        | PREDICTED: similar to                                          | LHALLGLAMPVDSLK     | a                        |
| IP00454722        | PREDICTED: similar to                                          | LYTLVLTDPDAPSR      | a; c; d; e               |
| IP00454960        | PREDICTED: similar to                                          | MAVEYDR             | a                        |
| IP00402452        | PREDICTED: similar to                                          | MKTHSVGQQTIPER      | a                        |
| IP00402452        | PREDICTED: similar to                                          | MKTHSVGQQTIPERLK    | a                        |
| IP00454960        | PREDICTED: similar to                                          | MSPWASGQHFMNTAER    | a                        |
| IP00454902        | PREDICTED: similar to                                          | RDPEPTMSEAAQRR      | a                        |
| IP00397192        | PREDICTED: similar to                                          | RMARSAISEASGNHCS    | a                        |
| IP00053535        | PREDICTED: similar to                                          | RPHHPHQDGAAPGPGPR   | a                        |
| IP00402452        | PREDICTED: similar to                                          | SGMARAVGPER         | a                        |
| IP00454960        | PREDICTED: similar to                                          | TGAGPGRGGLRAR       | a                        |
| IP00397192        | PREDICTED: similar to                                          | VGMAEKG             | a                        |
| IP00455216        | PREDICTED: similar to 0610010D24Rik                            | GAFIAPRTSVRSGLR     | a                        |
| IP00455216        | PREDICTED: similar to 0610010D24Rik                            | SMEEEK              | a                        |
| IP00259460        | PREDICTED: similar to 1110018J23Rik                            | DQEGADDR            | a                        |
| IP00259460        | PREDICTED: similar to 1110018J23Rik                            | MDPWAHDRKHHFR       | a                        |
| IP00737379        | PREDICTED: similar to 130KDa-Ins(1,4,5)P3 binding protein      | EDPAPDPAAGGEDDFR    | c; d; e                  |
| IP00398673        | PREDICTED: similar to 40S ribosomal protein S10                | IATYELLFK           | c; d                     |

| IPi Accession No. | Protein Description                                                                     | Peptide Sequence*  | Primary Source Dataset** |
|-------------------|-----------------------------------------------------------------------------------------|--------------------|--------------------------|
| IPi00373924       | PREDICTED: similar to 40S ribosomal protein S3a isoform 1                               | LFCVGFTK           | c                        |
| IPi00398958       | PREDICTED: similar to 40S ribosomal protein SA                                          | FAAATGATPIAGR      | d                        |
| IPi00457321       | PREDICTED: similar to 60S ribosomal                                                     | AEQRPRDWPEDPAGR    | a                        |
| IPi00457321       | PREDICTED: similar to 60S ribosomal                                                     | DWPEDPAGR          | a                        |
| IPi00457321       | PREDICTED: similar to 60S ribosomal                                                     | DWPEDPAGR          | a                        |
| IPi00457321       | PREDICTED: similar to 60S ribosomal                                                     | QMYRTEIXIVRGAR     | a                        |
| IPi00457321       | PREDICTED: similar to 60S ribosomal                                                     | RDPAGLSLPGR        | a                        |
| IPi00457321       | PREDICTED: similar to 60S ribosomal                                                     | SCSCEVAPNGLSLYCGQ  | a                        |
| IPi00457321       | PREDICTED: similar to 60S ribosomal                                                     | VPAVPELLOK         | a                        |
| IPi00735864       | PREDICTED: similar to 60S ribosomal protein L22 (Heparin binding protein HBp15) isoform | YFQINQDEEEDEED     | e                        |
| IPi00735235       | PREDICTED: similar to 60S ribosomal protein L6 (TAX-responsive enhancer element binding | ASITPGTILHILTGR    | d                        |
| IPi00736905       | PREDICTED: similar to actin-like protein                                                | QEVESGPSIVHR       | d                        |
| IPi00472098       | PREDICTED: similar to anaphase                                                          | ENRLLQLCQQTALPVG   | a                        |
| IPi00472098       | PREDICTED: similar to anaphase                                                          | ETPGAGWGR          | a                        |
| IPi00472098       | PREDICTED: similar to anaphase                                                          | GAHSGVGLQVR        | a                        |
| IPi00472098       | PREDICTED: similar to anaphase                                                          | NEVPWPMIRGGTEGKR   | a                        |
| IPi00472098       | PREDICTED: similar to anaphase                                                          | NQEESAANVEHLK      | a                        |
| IPi00472098       | PREDICTED: similar to anaphase                                                          | VVRAPSLAAR         | a                        |
| IPi00397111       | PREDICTED: similar to ankyrin repeat                                                    | CVLRGSGAGSDHLSGSS  | a                        |
| IPi00455697       | PREDICTED: similar to ankyrin repeat                                                    | GGPGGIADSLDRRLGV   | a                        |
| IPi00397111       | PREDICTED: similar to ankyrin repeat                                                    | LFGFGR             | a                        |
| IPi00397111       | PREDICTED: similar to ankyrin repeat                                                    | QPYIGNPPRGTLEPR    | a                        |
| IPi00238575       | PREDICTED: similar to apical early                                                      | AQTVGNCSVSK        | a                        |
| IPi00238575       | PREDICTED: similar to apical early                                                      | DEDFDWLTK          | a                        |
| IPi00238575       | PREDICTED: similar to apical early                                                      | ISSPVISK           | a                        |
| IPi00238575       | PREDICTED: similar to apical early                                                      | LLGLRGGGLPPPPEGG   | a                        |
| IPi00238575       | PREDICTED: similar to apical early                                                      | SFFASLGMCTVRFWFYM  | a                        |
| IPi00238575       | PREDICTED: similar to apical early                                                      | SKNCK              | a                        |
| IPi00454732       | PREDICTED: similar to ARHQ protein                                                      | MRWGGQR            | a                        |
| IPi00454732       | PREDICTED: similar to ARHQ protein                                                      | RTPQAGWGXAR        | a                        |
| IPi00454732       | PREDICTED: similar to ARHQ protein                                                      | SEGMRLRER          | a                        |
| IPi00454732       | PREDICTED: similar to ARHQ protein                                                      | TLARLNDMK          | a                        |
| IPi00175126       | PREDICTED: similar to ataxin-1                                                          | QTMELARNPAVMQEMM   | a                        |
| IPi00455544       | PREDICTED: similar to bA395L14.5                                                        | AGAGRGAPTCWR       | a                        |
| IPi00455544       | PREDICTED: similar to bA395L14.5                                                        | AVPRRAGAGR         | a                        |
| IPi00175043       | PREDICTED: similar to bA395L14.5                                                        | EELCFQPNIR         | a                        |
| IPi00455544       | PREDICTED: similar to bA395L14.5                                                        | LADSLALSRLGRQR     | a                        |
| IPi00455544       | PREDICTED: similar to bA395L14.5                                                        | NLLQRQIAFR         | a                        |
| IPi00175043       | PREDICTED: similar to bA395L14.5                                                        | QGRRTGAGSDGR       | a                        |
| IPi00455544       | PREDICTED: similar to bA395L14.5                                                        | SALSSVDLR          | a                        |
| IPi00175043       | PREDICTED: similar to bA395L14.5                                                        | TVPTAPR            | a                        |
| IPi00186338       | PREDICTED: similar to barrier to autointegration factor 1                               | EWCD AFL           | e                        |
| IPi00736494       | PREDICTED: similar to cAMP-regulated phosphoprotein 19                                  | TEVTGDHIPTQDLQPR   | d                        |
| IPi00457167       | PREDICTED: similar to carbonic                                                          | LGSCREQNGR         | a                        |
| IPi00183879       | PREDICTED: similar to CDNA sequence                                                     | CLEELVQLFR         | a                        |
| IPi00183879       | PREDICTED: similar to CDNA sequence                                                     | LPQLLR             | a                        |
| IPi00070778       | PREDICTED: similar to cell division cycle 42 isoform 1                                  | NVFDEAILAALEPEPK   | e                        |
| IPi00063523       | PREDICTED: similar to Centromeric                                                       | DSVEQVIR           | a                        |
| IPi00063523       | PREDICTED: similar to Centromeric                                                       | DVMGLKCTILK        | a                        |
| IPi00063523       | PREDICTED: similar to Centromeric                                                       | FSFSQKPLISSGAGK    | a                        |
| IPi00063523       | PREDICTED: similar to Centromeric                                                       | INRESTR            | a                        |
| IPi00063523       | PREDICTED: similar to Centromeric                                                       | KSLFR              | a                        |
| IPi00063523       | PREDICTED: similar to Centromeric                                                       | LIMQK              | a                        |
| IPi00063523       | PREDICTED: similar to Centromeric                                                       | MLPKCTDLK          | a                        |
| IPi00063523       | PREDICTED: similar to Centromeric                                                       | NQFSRVR            | a                        |
| IPi00063523       | PREDICTED: similar to Centromeric                                                       | QDTSFHEDSITSR      | a                        |
| IPi00063523       | PREDICTED: similar to Centromeric                                                       | QHHPQK             | a                        |
| IPi00063523       | PREDICTED: similar to Centromeric                                                       | QNKSPDTEK          | a                        |
| IPi00063523       | PREDICTED: similar to Centromeric                                                       | SSEAGEK            | a                        |
| IPi00063523       | PREDICTED: similar to Centromeric                                                       | SYTLEFGK           | a                        |
| IPi00063523       | PREDICTED: similar to Centromeric                                                       | VADMISVLDPNK       | a                        |
| IPi00374550       | PREDICTED: similar to CG15216-PA                                                        | TFPIQEPSPR         | e                        |
| IPi00376412       | PREDICTED: similar to CG3047-PA                                                         | ACSAVGITQPQR       | a                        |
| IPi00376412       | PREDICTED: similar to CG3047-PA                                                         | AMSGVAPELQPELIALQG | a                        |
| IPi00376412       | PREDICTED: similar to CG3047-PA                                                         | QTCVHNPDIRPR       | a                        |
| IPi00174237       | PREDICTED: similar to CG3104-PA                                                         | REQEAARR           | a                        |
| IPi00455426       | PREDICTED: similar to CG4329-PA                                                         | ATDQEMRR           | a                        |
| IPi00455426       | PREDICTED: similar to CG4329-PA                                                         | LQGVIK             | a                        |
| IPi00174574       | PREDICTED: similar to CG5882-PA                                                         | NLVEAQDEITDMKR     | a                        |
| IPi00174574       | PREDICTED: similar to CG5882-PA                                                         | SYDNEK             | a                        |
| IPi00455755       | PREDICTED: similar to chaperonin                                                        | AGMSSLK            | a                        |
| IPi00455755       | PREDICTED: similar to chaperonin                                                        | DLPASSCVLLAGKG     | a                        |
| IPi00455755       | PREDICTED: similar to chaperonin                                                        | FTFIEK             | a                        |
| IPi00735515       | PREDICTED: similar to chaperonin containing TCP1, subunit 8                             | LFVTNDAATILR       | e                        |
| IPi00735738       | PREDICTED: similar to chromosome 9 open reading frame 36                                | APTAGEQGR          | d                        |
| IPi00455254       | PREDICTED: similar to COMM domain                                                       | RAWAAGAMRGR        | a                        |
| IPi00738274       | PREDICTED: similar to Complement C3 precursor                                           | IWDVVEK            | d                        |
| IPi00739237       | PREDICTED: similar to Complement C3 precursor                                           | SGSDEVOVGQQR       | c                        |
| IPi00247243       | PREDICTED: similar to contains                                                          | ISVSVEPSAGR        | a                        |
| IPi00247243       | PREDICTED: similar to contains                                                          | SKALPALCHFEDPR     | a                        |
| IPi00455782       | PREDICTED: similar to Cytokine inducible                                                | CKADRK             | a                        |
| IPi00455782       | PREDICTED: similar to Cytokine inducible                                                | RDSYSR             | a                        |
| IPi00398943       | PREDICTED: similar to DEAD/H                                                            | KSPFGK             | a                        |
| IPi00398943       | PREDICTED: similar to DEAD/H                                                            | LCPGWGRLEVR        | a                        |
| IPi00398943       | PREDICTED: similar to DEAD/H                                                            | LPAWIR             | a                        |
| IPi00398943       | PREDICTED: similar to DEAD/H                                                            | RDLQPMMEVGR        | a                        |
| IPi00457207       | PREDICTED: similar to double C2-like                                                    | GKTAPGAMERGR       | a                        |
| IPi00457207       | PREDICTED: similar to double C2-like                                                    | SPTYARSQPTAPR      | a                        |
| IPi00457207       | PREDICTED: similar to double C2-like                                                    | TPLLPDR            | a                        |
| IPi00738219       | PREDICTED: similar to Down-regulated in metastasis protein                              | VPLAFAMVK          | c                        |
| IPi00400908       | PREDICTED: similar to echinoderm                                                        | AHDGPVFAMYALDKGFV  | a                        |
| IPi00400908       | PREDICTED: similar to echinoderm                                                        | DVHTHGVACLAFDSBQD  | a                        |
| IPi00400908       | PREDICTED: similar to echinoderm                                                        | EGGAVKLWDOEMKR     | a                        |
| IPi00400908       | PREDICTED: similar to echinoderm                                                        | KVTESVR            | a                        |
| IPi00400908       | PREDICTED: similar to echinoderm                                                        | LLAGTQDSEIFEVIVRER | a                        |
| IPi00738281       | PREDICTED: similar to Elongation factor 1-gamma (EF-1-gamma) (eEF-1B gamma) isoform 1   | MAQFDAK            | d                        |
| IPi00738289       | PREDICTED: similar to Elongation factor 1-gamma (EF-1-gamma) (eEF-1B gamma) isoform 3   | ILGLLDAYLK         | d                        |



| IPI Accession No. | Protein Description                                                                           | Peptide Sequence*  | Primary Source Dataset** |
|-------------------|-----------------------------------------------------------------------------------------------|--------------------|--------------------------|
| IP00646839        | PREDICTED: similar to eukaryotic translation initiation factor 3, subunit 8, 110kDa isoform 1 | QGLTK              | d                        |
| IP00739005        | PREDICTED: similar to eukaryotic translation initiation factor 4E isoform 3                   | WALWFFK            | d                        |
| IP00397997        | PREDICTED: similar to expressed                                                               | MGAGALAIQSK        | a                        |
| IP00397997        | PREDICTED: similar to expressed                                                               | NDVQESSLR          | a                        |
| IP00397997        | PREDICTED: similar to expressed                                                               | VNGNVKVEQLR        | a                        |
| IP00398985        | PREDICTED: similar to Fatty acid-binding protein, epidermal                                   | FEETTADGR          | d                        |
| IP00398985        | PREDICTED: similar to Fatty acid-binding protein, epidermal                                   | GFDEVMK            | c; d                     |
| IP00455552        | PREDICTED: similar to FKS30                                                                   | NDSSVK             | a                        |
| IP00470926        | PREDICTED: similar to FLJ00261 protein                                                        | EPESWDGRLGAVGR     | a                        |
| IP00470926        | PREDICTED: similar to FLJ00261 protein                                                        | LRWISALAMPR        | a                        |
| IP00470926        | PREDICTED: similar to FLJ00261 protein                                                        | SEEVTK             | a                        |
| IP00470926        | PREDICTED: similar to FLJ00261 protein                                                        | TETQSEKLR          | a                        |
| IP00470926        | PREDICTED: similar to FLJ00261 protein                                                        | VEEKISRATEGLETYR   | a                        |
| IP00470926        | PREDICTED: similar to FLJ00261 protein                                                        | WYRGAGSNGGAGPAG    | a                        |
| IP00245032        | PREDICTED: similar to Golgi autoantigen,                                                      | EGSPHDNPTVQQIVQLS  | a                        |
| IP00245032        | PREDICTED: similar to Golgi autoantigen,                                                      | EQQKTLQEQGR        | a                        |
| IP00245032        | PREDICTED: similar to Golgi autoantigen,                                                      | KSPGPAGAK          | a                        |
| IP00375207        | PREDICTED: similar to Grid2ip protein                                                         | LSPAELRQVLSMSEPRR  | a                        |
| IP00375207        | PREDICTED: similar to Grid2ip protein                                                         | SGDRILFLNGLDMR     | a                        |
| IP00236062        | PREDICTED: similar to growth                                                                  | RSGPXVTPIRLQSIK    | a                        |
| IP00236062        | PREDICTED: similar to growth                                                                  | TXALGR             | a                        |
| IP00216915        | PREDICTED: similar to HCV                                                                     | DVPLEEVVLK         | a                        |
| IP00216915        | PREDICTED: similar to HCV                                                                     | TALSSEATEEGNQQM    | a                        |
| IP000737273       | PREDICTED: similar to Heat shock 70 kDa protein 12A isoform 2                                 | TPHTLLTPER         | d; e                     |
| IP000737273       | PREDICTED: similar to Heat shock 70 kDa protein 12A isoform 2                                 | VGIDFLNY           | d; e                     |
| IP00454747        | PREDICTED: similar to heat shock 70kD                                                         | CEGXKIK            | a                        |
| IP00107552        | PREDICTED: similar to heat shock 70kD                                                         | LDYDEBASAMLK       | a; d                     |
| IP00107552        | PREDICTED: similar to heat shock 70kD                                                         | MCKQDPSLHTEEMR     | a                        |
| IP00454747        | PREDICTED: similar to heat shock 70kD                                                         | VAAIEALNDGELQK     | a                        |
| IP000737438       | PREDICTED: similar to heat shock protein 1 (chaperonin) isoform 3                             | GANPVEIR           | c; d                     |
| IP000374136       | PREDICTED: similar to hepatitis C virus                                                       | SLCEPLAETGSGR      | a                        |
| IP00402752        | PREDICTED: similar to HILV1821                                                                | ASRASFWAR          | a                        |
| IP00402752        | PREDICTED: similar to HILV1821                                                                | EPSVPIEVEK         | a                        |
| IP00074715        | PREDICTED: similar to homeobox protein                                                        | EHLASALQLTSTQVKIWF | a                        |
| IP00074715        | PREDICTED: similar to homeobox protein                                                        | GKAGDLGR           | a                        |
| IP00074715        | PREDICTED: similar to homeobox protein                                                        | LRLPESAIR          | a                        |
| IP00074715        | PREDICTED: similar to homeobox protein                                                        | NLSSSQARK          | a                        |
| IP00074715        | PREDICTED: similar to homeobox protein                                                        | QQRYSAPER          | a                        |
| IP00074715        | PREDICTED: similar to homeobox protein                                                        | SPENQVLRMDAEP      | a                        |
| IP00074715        | PREDICTED: similar to homeobox protein                                                        | SPTSAGTADTK        | a                        |
| IP00455956        | PREDICTED: similar to hypothetical                                                            | AHISTVVIPEQPR      | a                        |
| IP00397008        | PREDICTED: similar to Hypothetical                                                            | ALSCSPEAMRRR       | a                        |
| IP00455758        | PREDICTED: similar to hypothetical                                                            | AMITPALR           | a                        |
| IP00398112        | PREDICTED: similar to hypothetical                                                            | APGKLPDHPYRAQR     | a                        |
| IP00454964        | PREDICTED: similar to hypothetical                                                            | APGVLR             | a                        |
| IP00454964        | PREDICTED: similar to hypothetical                                                            | ARDRPTICCECKGFSR   | a                        |
| IP00397476        | PREDICTED: similar to Hypothetical                                                            | ARSGGAGAGQLTRALG   | a                        |
| IP00454964        | PREDICTED: similar to hypothetical                                                            | ASRPALGGPAR        | a                        |
| IP00455861        | PREDICTED: similar to hypothetical                                                            | DARPGPPGR          | a                        |
| IP00166622        | PREDICTED: similar to hypothetical                                                            | DARRILTLR          | a                        |
| IP00241802        | PREDICTED: similar to hypothetical                                                            | EAKHLGPHR          | a                        |
| IP00098338        | PREDICTED: similar to hypothetical                                                            | EPEPHSRQGQALGVK    | a                        |
| IP00402154        | PREDICTED: similar to Hypothetical                                                            | EPGNQETR           | a                        |
| IP00397008        | PREDICTED: similar to Hypothetical                                                            | FAQLGAEIMGR        | a                        |
| IP00455956        | PREDICTED: similar to hypothetical                                                            | FLCSIPDSLSSGMYR    | a                        |
| IP00455758        | PREDICTED: similar to hypothetical                                                            | FQELIQEYEDSGSK     | a                        |
| IP00397476        | PREDICTED: similar to Hypothetical                                                            | HAPSPGGWSTCQPR     | a                        |
| IP00398112        | PREDICTED: similar to hypothetical                                                            | HMGTKG             | a                        |
| IP00454964        | PREDICTED: similar to hypothetical                                                            | HSPFPVAGDSPIVAAAQP | a                        |
| IP00402154        | PREDICTED: similar to Hypothetical                                                            | IKGTPVVR           | a                        |
| IP00166622        | PREDICTED: similar to hypothetical                                                            | ILTLRLR            | a                        |
| IP00455758        | PREDICTED: similar to hypothetical                                                            | KLSSMLR            | a                        |
| IP00397476        | PREDICTED: similar to Hypothetical                                                            | LHAGPGDPSPAR       | a                        |
| IP00397008        | PREDICTED: similar to Hypothetical                                                            | LLELAGR            | a                        |
| IP00454964        | PREDICTED: similar to hypothetical                                                            | LPGRSK             | a                        |
| IP00166622        | PREDICTED: similar to hypothetical                                                            | NAPSCPSRLK         | a                        |
| IP00241802        | PREDICTED: similar to hypothetical                                                            | QATPK              | a                        |
| IP00402154        | PREDICTED: similar to Hypothetical                                                            | QLYSDIVMLNNIQR     | a                        |
| IP00098338        | PREDICTED: similar to hypothetical                                                            | RCYTLQENKQLR       | a                        |
| IP00098338        | PREDICTED: similar to hypothetical                                                            | RGEAEATQLQAALLKNA  | a                        |
| IP00397008        | PREDICTED: similar to Hypothetical                                                            | RKCSLNK            | a                        |
| IP00397476        | PREDICTED: similar to Hypothetical                                                            | SGGQAGQLTRALGLS    | a                        |
| IP00398224        | PREDICTED: similar to Hypothetical                                                            | SPPQALPGR          | a                        |
| IP00241802        | PREDICTED: similar to hypothetical                                                            | SYEGK              | a                        |
| IP00397476        | PREDICTED: similar to Hypothetical                                                            | TPRLHAGPGDPSPAR    | a                        |
| IP00241802        | PREDICTED: similar to hypothetical                                                            | TSDICKK            | a                        |
| IP00455861        | PREDICTED: similar to hypothetical                                                            | TSLLTADGSTPDQRR    | a                        |
| IP00455861        | PREDICTED: similar to hypothetical                                                            | VDECEVHK           | a                        |
| IP00402154        | PREDICTED: similar to Hypothetical                                                            | VTSPCGSLWLVGWR     | a                        |
| IP00455861        | PREDICTED: similar to hypothetical                                                            | WHSSLAK            | a                        |
| IP00166622        | PREDICTED: similar to hypothetical                                                            | WVPYSRKQCDMK       | a                        |
| IP00739552        | PREDICTED: similar to interferon stimulated exonuclease gene 20kDa-like 2                     | AEEPK              | c                        |
| IP00735888        | PREDICTED: similar to IQ motif and Sec7 domain 3                                              | DASYPLQDITGYTAR    | c                        |
| IP00180070        | PREDICTED: similar to IQ motif and Sec7 domain 3                                              | ELTAVQK            | d                        |
| IP00739080        | PREDICTED: similar to Jerky protein                                                           | VAVIEK             | d                        |
| IP00215804        | PREDICTED: similar to keratin 8                                                               | ASLEAAVADAEQRGELAI | a                        |
| IP00215804        | PREDICTED: similar to keratin 8                                                               | LESGMQNMSHTK       | a                        |
| IP00455916        | PREDICTED: similar to Keratin, type I                                                         | ASLENSLR           | a                        |
| IP00455916        | PREDICTED: similar to Keratin, type I                                                         | GLAGMGGIQNK        | a                        |
| IP00455689        | PREDICTED: similar to Keratin, type I                                                         | IRHLEK             | a                        |
| IP00455689        | PREDICTED: similar to Keratin, type I                                                         | IRXHEK             | a                        |
| IP00455916        | PREDICTED: similar to Keratin, type I                                                         | KNHEEQDLAKIMADIR   | a                        |
| IP00455689        | PREDICTED: similar to Keratin, type I                                                         | MHLEK              | a                        |
| IP00455689        | PREDICTED: similar to Keratin, type I                                                         | MNFTTRSTFNXXR      | a                        |
| IP00455916        | PREDICTED: similar to Keratin, type I                                                         | NRXELDK            | a                        |
| IP00455689        | PREDICTED: similar to Keratin, type I                                                         | NVDDITVTR          | a                        |
| IP00455689        | PREDICTED: similar to Keratin, type I                                                         | QAQEXEDLLNVK       | a                        |



| IPi Accession No. | Protein Description                                                                     | Peptide Sequence*  | Primary Source Dataset** |
|-------------------|-----------------------------------------------------------------------------------------|--------------------|--------------------------|
| IP00455916        | PREDICTED: similar to Keratin, type 1                                                   | VYSEINNYK          | a                        |
| IP00455689        | PREDICTED: similar to Keratin, type 1                                                   | XHLEKKGQVR         | a                        |
| IP00479880        | PREDICTED: similar to KIAA0350 protein                                                  | CFIKPTETLERSLEMNK  | a                        |
| IP00479880        | PREDICTED: similar to KIAA0350 protein                                                  | GEPETQLPLTREDLIK   | a                        |
| IP00479880        | PREDICTED: similar to KIAA0350 protein                                                  | IMNNAQPDGKIR       | a                        |
| IP00479880        | PREDICTED: similar to KIAA0350 protein                                                  | IVETVYVGFNPKSVR    | a                        |
| IP00479880        | PREDICTED: similar to KIAA0350 protein                                                  | NRVFLKEMGTLGYR     | a                        |
| IP00479880        | PREDICTED: similar to KIAA0350 protein                                                  | RVGAADMFGFR        | a                        |
| IP00175101        | PREDICTED: similar to KIAA0445 protein                                                  | DFSPSRVAGGPERFHR   | a                        |
| IP00175101        | PREDICTED: similar to KIAA0445 protein                                                  | EREALRQLEAQR       | a                        |
| IP00175101        | PREDICTED: similar to KIAA0445 protein                                                  | LREAQR             | a                        |
| IP00175101        | PREDICTED: similar to KIAA0445 protein                                                  | MLTRDFSPSDR        | a                        |
| IP00175101        | PREDICTED: similar to KIAA0445 protein                                                  | QEQLGQAALLGR       | a                        |
| IP00175101        | PREDICTED: similar to KIAA0445 protein                                                  | TVERSGR            | a                        |
| IP00175101        | PREDICTED: similar to KIAA0445 protein                                                  | VTAWGTVLGSR        | a                        |
| IP00374289        | PREDICTED: similar to KIAA0752 protein                                                  | VEEEVK             | a                        |
| IP00374289        | PREDICTED: similar to KIAA0752 protein                                                  | WNVLK              | a                        |
| IP00455296        | PREDICTED: similar to KIAA1501 protein                                                  | DDMLGGSESRGR       | a                        |
| IP00399193        | PREDICTED: similar to KIAA1501 protein                                                  | GRFTISRDNAK        | a                        |
| IP00455296        | PREDICTED: similar to KIAA1501 protein                                                  | GSRLGLGLK          | a                        |
| IP00455296        | PREDICTED: similar to KIAA1501 protein                                                  | HQRAIK             | a                        |
| IP00399193        | PREDICTED: similar to KIAA1501 protein                                                  | NSLYLQMNSLRAEDMAV  | a                        |
| IP00399193        | PREDICTED: similar to KIAA1501 protein                                                  | QHPPQGEGR          | a                        |
| IP00455296        | PREDICTED: similar to KIAA1501 protein                                                  | REGWLYYK           | a                        |
| IP00455296        | PREDICTED: similar to KIAA1501 protein                                                  | VSHSSGPKADSSPK     | a                        |
| IP00398068        | PREDICTED: similar to KIAA1552 protein                                                  | EKAAGEK            | a                        |
| IP00398068        | PREDICTED: similar to KIAA1552 protein                                                  | ERLPSMAQEDPEK      | a                        |
| IP00455450        | PREDICTED: similar to KIAA1693 protein                                                  | NLKEK              | a                        |
| IP00455450        | PREDICTED: similar to KIAA1693 protein                                                  | WDQVK              | a                        |
| IP00376747        | PREDICTED: similar to KIAA1833 protein                                                  | ACEEYLR            | a                        |
| IP00376747        | PREDICTED: similar to KIAA1833 protein                                                  | TSAGHEEGATR        | a                        |
| IP00376747        | PREDICTED: similar to KIAA1833 protein                                                  | YMEELLR            | a                        |
| IP00376411        | PREDICTED: similar to L.Wamide                                                          | CDDLITQNPVSPK      | a                        |
| IP00376411        | PREDICTED: similar to L.Wamide                                                          | IHGVSVAENSRVPGMNL  | a                        |
| IP00376411        | PREDICTED: similar to L.Wamide                                                          | NMRPPVSAIR         | a                        |
| IP00455025        | PREDICTED: similar to meningioma                                                        | AFSDTGLSSLPEQDCK   | a                        |
| IP00455025        | PREDICTED: similar to meningioma                                                        | IMTEFYQENEMK       | a                        |
| IP00455025        | PREDICTED: similar to meningioma                                                        | KLTFEENYR          | a                        |
| IP00455025        | PREDICTED: similar to meningioma                                                        | LYVGREQK           | a                        |
| IP00455025        | PREDICTED: similar to meningioma                                                        | SRLYVGREQK         | a                        |
| IP00151462        | PREDICTED: similar to microtubule-associated proteins 1A/1B light chain 3               | IPVIER             | d                        |
| IP00465123        | PREDICTED: similar to myocyte nuclear                                                   | EFELMRQPSVTIGR     | a                        |
| IP00465123        | PREDICTED: similar to myocyte nuclear                                                   | EIQDEELKK          | a                        |
| IP00465123        | PREDICTED: similar to myocyte nuclear                                                   | GAPALQLPK          | a                        |
| IP00465123        | PREDICTED: similar to myocyte nuclear                                                   | QIRRR              | a                        |
| IP00645529        | PREDICTED: similar to myomegalin                                                        | GSADLWIAK          | d                        |
| IP00457190        | PREDICTED: similar to nodulin                                                           | NPTEQPEALR         | a                        |
| IP00181126        | PREDICTED: similar to Nonhistone chromosomal protein HMG-17 (High-mobility group nucle  | AEGAGDAK           | c                        |
| IP00739332        | PREDICTED: similar to Nuclear transport factor 2                                        | GFHMFLLK           | d                        |
| IP00007659        | PREDICTED: similar to Nuclear transport factor 2                                        | LSSLPFQK           | c                        |
| IP00455423        | PREDICTED: similar to nucleophosmin 1 isoform 2                                         | SAPGGGSK           | d                        |
| IP00455998        | PREDICTED: similar to OFD1 protein                                                      | LLTQEYTTAPR        | a                        |
| IP00736146        | PREDICTED: similar to peptidylprolyl isomerase A isoform 1                              | HVYFGK             | c                        |
| IP00736146        | PREDICTED: similar to peptidylprolyl isomerase A isoform 1                              | ITLADCGQLE         | ct; d; e                 |
| IP00736146        | PREDICTED: similar to peptidylprolyl isomerase A isoform 1                              | SVYGEK             | ct; d; e                 |
| IP00736047        | PREDICTED: similar to phosphodiesterase 4D interacting protein isoform 2                | MELKPRR            | d                        |
| IP00736821        | PREDICTED: similar to Phosphoglycerate mutase 1 (Phosphoglycerate mutase isozyme B) (PG | AETAAK             | ct; d                    |
| IP00736821        | PREDICTED: similar to Phosphoglycerate mutase 1 (Phosphoglycerate mutase isozyme B) (PG | HGEAQVK            | c                        |
| IP00736821        | PREDICTED: similar to Phosphoglycerate mutase 1 (Phosphoglycerate mutase isozyme B) (PG | HGESAWNENR         | c                        |
| IP00453476        | PREDICTED: similar to Phosphoglycerate mutase 1 (Phosphoglycerate mutase isozyme B) (PG | HYGGLTGLNK         | d                        |
| IP00735578        | PREDICTED: similar to Piccolo protein (Aczonin) isoform 16                              | SSPQQQTSFK         | e                        |
| IP00455888        | PREDICTED: similar to Plasma                                                            | ALAAAGPR           | a                        |
| IP00455888        | PREDICTED: similar to Plasma                                                            | APAPRGAPTWGLGAR    | a                        |
| IP00455888        | PREDICTED: similar to Plasma                                                            | DAQATQPRRR         | a                        |
| IP00455888        | PREDICTED: similar to Plasma                                                            | ELQFVFLSCLSLPRELR  | a                        |
| IP00455888        | PREDICTED: similar to Plasma                                                            | RRVAESLQAPGGQSGR   | a                        |
| IP00455344        | PREDICTED: similar to pleckstrin                                                        | GVTSWAAAGR         | a                        |
| IP00455344        | PREDICTED: similar to pleckstrin                                                        | LQAGNAAAALWRDLVR   | a                        |
| IP00455344        | PREDICTED: similar to pleckstrin                                                        | SPANPCABLR         | a                        |
| IP00455344        | PREDICTED: similar to pleckstrin                                                        | XRKYQQQVVEA        | a                        |
| IP00454868        | PREDICTED: similar to plexin A1                                                         | GSKMVSIEIYLR       | a                        |
| IP00454868        | PREDICTED: similar to plexin A1                                                         | LFVCTPIDGK         | a                        |
| IP00454868        | PREDICTED: similar to plexin A1                                                         | LSPETGPR           | a                        |
| IP00454868        | PREDICTED: similar to plexin A1                                                         | LSPETGPRQGGTR      | a                        |
| IP00454868        | PREDICTED: similar to plexin A1                                                         | QTSAYNISNSSTFTK    | a                        |
| IP00454868        | PREDICTED: similar to plexin A1                                                         | SHMESMLR           | a                        |
| IP00455547        | PREDICTED: similar to POTE2A                                                            | EIALAPSMVK         | a                        |
| IP00455547        | PREDICTED: similar to POTE2A                                                            | ELPDVLAIK          | a                        |
| IP00455547        | PREDICTED: similar to POTE2A                                                            | GSENGQPEK          | a                        |
| IP00455547        | PREDICTED: similar to POTE2A                                                            | GSGKSNVYASGDHDDSD  | a                        |
| IP00455547        | PREDICTED: similar to POTE2A                                                            | MSQEPENKDGDR       | a                        |
| IP00455547        | PREDICTED: similar to POTE2A                                                            | RCQLNVLNPK         | a                        |
| IP00454731        | PREDICTED: similar to PPIA protein                                                      | IPGFMVXGDFTHHNSF   | a                        |
| IP00454731        | PREDICTED: similar to PPIA protein                                                      | MKEGMNIVEATXR      | a                        |
| IP00454731        | PREDICTED: similar to PPIA protein                                                      | MKEGMNIVEATXRFGR   | a                        |
| IP00402120        | PREDICTED: similar to PRED4                                                             | ILDAVFSCER         | a                        |
| IP00402120        | PREDICTED: similar to PRED4                                                             | LEDSFDK            | a                        |
| IP00402120        | PREDICTED: similar to PRED4                                                             | LSSLFQFRYQKLCQPLST | a                        |
| IP00402120        | PREDICTED: similar to PRED4                                                             | RASQYR             | a                        |
| IP00402120        | PREDICTED: similar to PRED4                                                             | VSLPNK             | a                        |
| IP00455395        | PREDICTED: similar to pregnancy                                                         | LSAEGGR            | a                        |
| IP00719340        | PREDICTED: similar to proline rich protein 2                                            | SEEAGGAQNTR        | d                        |
| IP00739539        | PREDICTED: similar to Prostate, ovary, testis expressed protein on chromosome 2 isoform | ANLNALDR           | e                        |
| IP00455897        | PREDICTED: similar to prot GOR                                                          | AKETGAAGGR         | a                        |
| IP00455897        | PREDICTED: similar to prot GOR                                                          | SASPALACXPQASSK    | a                        |
| IP00455897        | PREDICTED: similar to prot GOR                                                          | VAYDCSPNKR         | a                        |
| IP00455897        | PREDICTED: similar to prot GOR                                                          | VTYVDADMRL         | a                        |

| IPI Accession No. | Protein Description                                                                      | Peptide Sequence*  | Primary Source Dataset** |
|-------------------|------------------------------------------------------------------------------------------|--------------------|--------------------------|
| IP0035343         | PREDICTED: similar to protein similar to dynein                                          | JENAMK             | c                        |
| IP00398941        | PREDICTED: similar to ribosomal protein                                                  | ADPQYSEPQSR        | a                        |
| IP00457226        | PREDICTED: similar to ribosomal protein                                                  | CCGGRTLR           | a                        |
| IP00457226        | PREDICTED: similar to ribosomal protein                                                  | DDSGPTFSR          | a                        |
| IP00018680        | PREDICTED: similar to ribosomal protein                                                  | EDQVNR             | a                        |
| IP00457083        | PREDICTED: similar to ribosomal protein                                                  | EYRQMYRIER         | a                        |
| IP00398941        | PREDICTED: similar to ribosomal protein                                                  | GGEEMQHSKEPLSK     | a                        |
| IP00018680        | PREDICTED: similar to ribosomal protein                                                  | IRATWGGK           | a                        |
| IP00457226        | PREDICTED: similar to ribosomal protein                                                  | LELQGSNK           | a                        |
| IP00457226        | PREDICTED: similar to ribosomal protein                                                  | MDDSGPTFSR         | a                        |
| IP00457083        | PREDICTED: similar to ribosomal protein                                                  | MHQNK              | a                        |
| IP00457083        | PREDICTED: similar to ribosomal protein                                                  | MLXKAR             | a                        |
| IP00457226        | PREDICTED: similar to ribosomal protein                                                  | VAPGSSEVALPSPTIALR | a                        |
| IP00457226        | PREDICTED: similar to ribosomal protein                                                  | WAGQMMFSRVKGGGR    | a                        |
| IP00741167        | PREDICTED: similar to ribosomal protein L34                                              | AFLEEQK            | d                        |
| IP00738685        | PREDICTED: similar to ribosomal protein L9                                               | QVDPAEK            | d                        |
| IP00738251        | PREDICTED: similar to ribosomal protein S18 isoform 2                                    | IPDWFLNR           | d; e                     |
| IP00175649        | PREDICTED: similar to RIKEN cDNA                                                         | AFPMSER            | a                        |
| IP00235708        | PREDICTED: similar to RIKEN cDNA                                                         | ANASRGSPESGHRESPR  | a                        |
| IP00400828        | PREDICTED: similar to RIKEN cDNA                                                         | ASKGSYMEVRTGDPPEP  | a                        |
| IP00400828        | PREDICTED: similar to RIKEN cDNA                                                         | ASTSSSGSVR         | a                        |
| IP00175649        | PREDICTED: similar to RIKEN cDNA                                                         | CYNIVVEAMK         | a                        |
| IP00401020        | PREDICTED: similar to RIKEN cDNA                                                         | DEINMGLFK          | a                        |
| IP00401020        | PREDICTED: similar to RIKEN cDNA                                                         | DPLLNPMVK          | a                        |
| IP00400828        | PREDICTED: similar to RIKEN cDNA                                                         | DSGHIRMIPLRNVGAGG  | a                        |
| IP00455849        | PREDICTED: similar to RIKEN cDNA                                                         | EPAGSEQARLAGADVVR  | a                        |
| IP00398087        | PREDICTED: similar to RIKEN cDNA                                                         | ETSLWRDGERLCCVVR   | a                        |
| IP00164993        | PREDICTED: similar to RIKEN cDNA                                                         | EVHEFISKKEPNLENEK  | a                        |
| IP00457042        | PREDICTED: similar to RIKEN cDNA                                                         | EVSTGLVAGAR        | a                        |
| IP00232276        | PREDICTED: similar to RIKEN cDNA                                                         | GGPSSAK            | a                        |
| IP00400828        | PREDICTED: similar to RIKEN cDNA                                                         | GRRAAAEAEK         | a                        |
| IP00232276        | PREDICTED: similar to RIKEN cDNA                                                         | GYIDNPLR           | a                        |
| IP00056742        | PREDICTED: similar to RIKEN cDNA                                                         | HLGPSFVVR          | a                        |
| IP00455473        | PREDICTED: similar to RIKEN cDNA                                                         | LLELTQK            | a                        |
| IP00329341        | PREDICTED: similar to RIKEN cDNA                                                         | MSLIDLAGSERASSTHAK | a                        |
| IP00056742        | PREDICTED: similar to RIKEN cDNA                                                         | NLGEPEVYGR         | a                        |
| IP00164993        | PREDICTED: similar to RIKEN cDNA                                                         | NSCPVLITGSEGVGK    | a                        |
| IP00329341        | PREDICTED: similar to RIKEN cDNA                                                         | QLALK              | a                        |
| IP00175649        | PREDICTED: similar to RIKEN cDNA                                                         | QTNIASTLAR         | a                        |
| IP00400828        | PREDICTED: similar to RIKEN cDNA                                                         | RGDSGTGGAGEAGDR    | a                        |
| IP00175649        | PREDICTED: similar to RIKEN cDNA                                                         | RHTLEK             | a                        |
| IP00329341        | PREDICTED: similar to RIKEN cDNA                                                         | RPSALEADSPMAPK     | a                        |
| IP00398117        | PREDICTED: similar to RIKEN cDNA                                                         | SDFCGSPFMENPRCPR   | a                        |
| IP00175649        | PREDICTED: similar to RIKEN cDNA                                                         | SFPNEMGK           | a                        |
| IP00398117        | PREDICTED: similar to RIKEN cDNA                                                         | SGEADLGPARG        | a                        |
| IP00455473        | PREDICTED: similar to RIKEN cDNA                                                         | SGVEKYPTDK         | a                        |
| IP00056742        | PREDICTED: similar to RIKEN cDNA                                                         | SSPSRAASHSHK       | a                        |
| IP00457042        | PREDICTED: similar to RIKEN cDNA                                                         | TDFRPPAHPSGR       | a                        |
| IP00455473        | PREDICTED: similar to RIKEN cDNA                                                         | TNNDKEVNAEHHIK     | a                        |
| IP00056742        | PREDICTED: similar to RIKEN cDNA                                                         | TQDLAPLEK          | a                        |
| IP00164993        | PREDICTED: similar to RIKEN cDNA                                                         | TTTANLMIRPEQSK     | a                        |
| IP00164993        | PREDICTED: similar to RIKEN cDNA                                                         | TVVNSKEMAALLFVHEAT | a                        |
| IP00398087        | PREDICTED: similar to RIKEN cDNA                                                         | YDMSDMTPAALTK      | a                        |
| IP00455473        | PREDICTED: similar to RIKEN cDNA                                                         | VFRASESQILSAEKMLDT | a                        |
| IP00455849        | PREDICTED: similar to RIKEN cDNA                                                         | VGSRMPSLTASRAGSR   | a                        |
| IP00329341        | PREDICTED: similar to RIKEN cDNA                                                         | VPLGSPAMQNCSTPLAL  | a                        |
| IP00455849        | PREDICTED: similar to RIKEN cDNA                                                         | VPSLVLSMDSR        | a                        |
| IP00249656        | PREDICTED: similar to RIKEN cDNA                                                         | VSAHKDVK           | a                        |
| IP00457042        | PREDICTED: similar to RIKEN cDNA                                                         | YQLELPLHERARKPK    | a                        |
| IP00058949        | PREDICTED: similar to ring finger protein                                                | KSQPIVQDGLWGIWR    | a                        |
| IP00457363        | PREDICTED: similar to RPE-spondin                                                        | APHAQWTRYLSQGHITVC | a                        |
| IP00457363        | PREDICTED: similar to RPE-spondin                                                        | GKGAGLDAAWTTTR     | a                        |
| IP00457363        | PREDICTED: similar to RPE-spondin                                                        | RAFVRQCAGAK        | a                        |
| IP00457363        | PREDICTED: similar to RPE-spondin                                                        | RDMAR              | a                        |
| IP00457363        | PREDICTED: similar to RPE-spondin                                                        | RRALSVSVPR         | a                        |
| IP00457363        | PREDICTED: similar to RPE-spondin                                                        | VQCAGAK            | a                        |
| IP00472890        | PREDICTED: similar to SCO-spondin                                                        | CPPGLLLHDTLR       | a                        |
| IP00472890        | PREDICTED: similar to SCO-spondin                                                        | FSHYVTCQVPAKSPAS   | a                        |
| IP00472890        | PREDICTED: similar to SCO-spondin                                                        | GELEDCMLALTR       | a                        |
| IP00472890        | PREDICTED: similar to SCO-spondin                                                        | LEGTVVHMLR         | a                        |
| IP00472890        | PREDICTED: similar to SCO-spondin                                                        | LHGICLDKLEVAEQK    | a                        |
| IP00472890        | PREDICTED: similar to SCO-spondin                                                        | MVQARFVR           | a                        |
| IP00472890        | PREDICTED: similar to SCO-spondin                                                        | QEDLVPCASLDHIYSR   | a                        |
| IP00472890        | PREDICTED: similar to SCO-spondin                                                        | TCAALPGGLHSTR      | a                        |
| IP00472890        | PREDICTED: similar to SCO-spondin                                                        | TTLPTVTR           | a                        |
| IP00472890        | PREDICTED: similar to SCO-spondin                                                        | VGSPGPAHLEPEDDR    | a                        |
| IP00737403        | PREDICTED: similar to signal recognition particle 14kDa                                  | VLESEQFLTELTR      | d                        |
| IP00160454        | PREDICTED: similar to Succinate dehydrogenase                                            | QIXGTAEK           | c                        |
| IP00457124        | PREDICTED: similar to testis expressed                                                   | NTNIQRIQRATEEA VR  | a                        |
| IP00457124        | PREDICTED: similar to testis expressed                                                   | RLQRR              | a                        |
| IP00457124        | PREDICTED: similar to testis expressed                                                   | VNVLK              | a                        |
| IP00454980        | PREDICTED: similar to Tetraicoceptide                                                    | AVNXCEGLQIDAKEK    | a                        |
| IP00739308        | PREDICTED: similar to Transcript Y 10 protein                                            | FTIQAPDIR          | c                        |
| IP00051152        | PREDICTED: similar to tripartite                                                         | ELQHSVR            | a                        |
| IP00455440        | PREDICTED: similar to tripartite                                                         | ESFNLSQEK          | a                        |
| IP00051152        | PREDICTED: similar to tripartite                                                         | ESTYAKGKNMAMTGGPD  | a                        |
| IP00051152        | PREDICTED: similar to tripartite                                                         | KNSTMFK            | a                        |
| IP00051152        | PREDICTED: similar to tripartite                                                         | QEFEEKLARFR        | a                        |
| IP00051152        | PREDICTED: similar to tripartite                                                         | SQAELQKQYK         | a                        |
| IP00455440        | PREDICTED: similar to tripartite                                                         | SQSPLDSTK          | a                        |
| IP00051152        | PREDICTED: similar to tripartite                                                         | TLSPENYAAYK        | a                        |
| IP00401895        | PREDICTED: similar to TSG118.1                                                           | VEAPEYIPISDDPK     | a                        |
| IP00401895        | PREDICTED: similar to TSG118.1                                                           | YSRGAGLGFSTAPNK    | a                        |
| IP00455418        | PREDICTED: similar to Ubiquinol-cytochrome c reductase complex 11 kDa protein, mitochond | LFNNLK             | d                        |
| IP00397808        | PREDICTED: similar to ubiquitin and ribosomal protein S27a precursor                     | IQDKGIPPPQQR       | c; d; e                  |
| IP00176610        | PREDICTED: similar to inactive progesterone receptor, 23 kD                              | LTFSLGSDNFK        | d; e                     |
| IP00736715        | PREDICTED: similar to Unc-13 homolog A                                                   | FELPLDPEEAR        | e                        |

| IPi Accession No. | Protein Description                                 | Peptide Sequence*       | Primary Source Dataset** |
|-------------------|-----------------------------------------------------|-------------------------|--------------------------|
| IPi00737595       | PREDICTED: similar to vacuolar protein sorting 35   | SEDPQYQLLNTAR           | c                        |
| IPi00455810       | PREDICTED: similar to vasoactive                    | ALGGPRHAEIGMR           | a                        |
| IPi00455810       | PREDICTED: similar to vasoactive                    | GLRALAPGPCWRR           | a                        |
| IPi00455810       | PREDICTED: similar to vasoactive                    | LRVGLK                  | a                        |
| IPi00455810       | PREDICTED: similar to vasoactive                    | RALGGPR                 | a                        |
| IPi00740402       | PREDICTED: similar to very large inducible GTPase 1 | CAXRLEK                 | e                        |
| IPi00045320       | PREDICTED: similar to WTI-interacting               | EMGRDVGK                | a                        |
| IPi00045320       | PREDICTED: similar to WTI-interacting               | SPEPAGAPFFPLPALPLP      | a                        |
| IPi00455288       | PREDICTED: similar to zinc finger protein           | AFNCRSVLTKHQR           | a                        |
| IPi00455288       | PREDICTED: similar to zinc finger protein           | EQNPYNLK                | a                        |
| IPi00456000       | PREDICTED: similar to Zinc finger protein           | LFSDFTIKK               | a                        |
| IPi00455288       | PREDICTED: similar to zinc finger protein           | SFKMSSALQHER            | a                        |
| IPi00456000       | PREDICTED: similar to Zinc finger protein           | SSTLINHKKR              | a                        |
| IPi00304710       | PREDICTED: sphingosine kinase type                  | DSVTECK                 | a                        |
| IPi00304710       | PREDICTED: sphingosine kinase type                  | LSEIK                   | a                        |
| IPi00304710       | PREDICTED: sphingosine kinase type                  | VPDSSATTSSKEIYLK        | a                        |
| IPi00304710       | PREDICTED: sphingosine kinase type                  | YMLRDIER                | a                        |
| IPi00008140       | PREDICTED: START domain containing                  | ELYARQK                 | a                        |
| IPi00008140       | PREDICTED: START domain containing                  | ISASTSPQHDGKDLR         | a                        |
| IPi00008140       | PREDICTED: START domain containing                  | ITPNPERSREGVR           | a                        |
| IPi00008140       | PREDICTED: START domain containing                  | LGNFRC                  | a                        |
| IPi00008140       | PREDICTED: START domain containing                  | QPHQMSVQGLASLR          | a                        |
| IPi00008140       | PREDICTED: START domain containing                  | SREGVR                  | a                        |
| IPi00008140       | PREDICTED: START domain containing                  | TSSEHLQAASYPAR          | a                        |
| IPi00296421       | PREDICTED: tangerin                                 | ASKDGGAEAPR             | a                        |
| IPi00296421       | PREDICTED: tangerin                                 | EAADRADGAAPGVASRN       | a                        |
| IPi00296421       | PREDICTED: tangerin                                 | LSRQLSRR                | a                        |
| IPi00296421       | PREDICTED: tangerin                                 | RFELLSREL               | a                        |
| IPi00064158       | PREDICTED: tau tubulin kinase 1                     | DHVCRFIGCCR             | a                        |
| IPi00064158       | PREDICTED: tau tubulin kinase 1                     | ERWSK                   | a                        |
| IPi00064158       | PREDICTED: tau tubulin kinase 1                     | FNYYVMQLQGRNLADLR       | a                        |
| IPi00064158       | PREDICTED: tau tubulin kinase 1                     | NASASPRSQSLSRR          | a                        |
| IPi00479688       | PREDICTED: TBC1 domain family,                      | NTFQVSR                 | a                        |
| IPi00374208       | PREDICTED: TBP-interacting protein                  | FMATSDLMSELQK           | a                        |
| IPi00374208       | PREDICTED: TBP-interacting protein                  | GOVPLVK                 | a                        |
| IPi00374208       | PREDICTED: TBP-interacting protein                  | RDILREVEMGPFK           | a                        |
| IPi00177509       | PREDICTED: trafficking protein particle             | FLGGGMEAR               | a                        |
| IPi00177509       | PREDICTED: trafficking protein particle             | VLDALVAR                | a                        |
| IPi00375124       | PREDICTED: ubiquitin specific protease              | DQPSQSR                 | a                        |
| IPi00375124       | PREDICTED: ubiquitin specific protease              | IWGQAQDEAKAQSPTPA       | a                        |
| IPi00375124       | PREDICTED: ubiquitin specific protease              | RESSSGEPAR              | a                        |
| IPi00375124       | PREDICTED: ubiquitin specific protease              | SFFAGAQTR               | a                        |
| IPi00456919       | PREDICTED: upstream regulatory                      | AESPEEVACR              | a                        |
| IPi00456919       | PREDICTED: upstream regulatory                      | EWYMIISREMFNPMYALF      | a                        |
| IPi00456919       | PREDICTED: upstream regulatory                      | GLQSFVQCQFFER           | a                        |
| IPi00456919       | PREDICTED: upstream regulatory                      | KEDMAVHVRR              | a                        |
| IPi00456919       | PREDICTED: upstream regulatory                      | NSSNGQLEK               | a                        |
| IPi00456919       | PREDICTED: upstream regulatory                      | QLEAEADAHQMVREGQR       | a                        |
| IPi00456919       | PREDICTED: upstream regulatory                      | RTPLLTR                 | a                        |
| IPi00456919       | PREDICTED: upstream regulatory                      | SPEEMK                  | a                        |
| IPi00456919       | PREDICTED: upstream regulatory                      | VLGPAACR                | a                        |
| IPi00456919       | PREDICTED: upstream regulatory                      | YPYHMLQK                | a                        |
| IPi00456878       | PREDICTED: very large inducible                     | GNMKISDYK               | a                        |
| IPi00456742       | PREDICTED: YLP motif containing 1                   | DDRAQSVR                | a                        |
| IPi00456742       | PREDICTED: YLP motif containing 1                   | DRGLVRPSSK              | a                        |
| IPi00456742       | PREDICTED: YLP motif containing 1                   | GLPRPDR                 | a                        |
| IPi00221090       | PREDICTED: zinc finger homeobox 2                   | FNLLGK                  | a                        |
| IPi00084684       | PREDICTED: zinc finger protein 469                  | AVGLAPGELAR             | a                        |
| IPi00084684       | PREDICTED: zinc finger protein 469                  | EPEDPGIPETGRSGATK       | a                        |
| IPi00084684       | PREDICTED: zinc finger protein 469                  | GHLQER                  | a                        |
| IPi00084684       | PREDICTED: zinc finger protein 469                  | MPRVTCPTGLGLGR          | a                        |
| IPi00084684       | PREDICTED: zinc finger protein 469                  | RTEEAAGAGR              | a                        |
| IPi00001653       | PREDICTED: zinc finger, SWIM domain                 | DLIQGGCLR               | a                        |
| IPi00006052       | Prefoldin subunit 2                                 | ENSEGAGAK               | d                        |
| IPi00005657       | Prefoldin subunit 6                                 | AGAPGK                  | c                        |
| IPi00005657       | Prefoldin subunit 6                                 | ETLAQLQEFQR             | c                        |
| IPi00016387       | Pre-mRNA cleavage complex II protein                | FEGSPGGLR               | a                        |
| IPi00016387       | Pre-mRNA cleavage complex II protein                | GQPVGGLRFEFGHGPS        | a                        |
| IPi00016387       | Pre-mRNA cleavage complex II protein                | MIFEGPNK                | a                        |
| IPi00016387       | Pre-mRNA cleavage complex II protein                | SACGEAGAAR              | a                        |
| IPi00016387       | Pre-mRNA cleavage complex II protein                | VDENR                   | a                        |
| IPi00384280       | Pre-nlycysteine oxidase precursor                   | AGFSEK                  | c                        |
| IPi00384280       | Pre-nlycysteine oxidase precursor                   | SDFYDVLVATPLNR          | d                        |
| IPi00164755       | Prepro-alpha2(I) collagen precursor                 | AGEDGHGPKGRPGER         | a                        |
| IPi00164755       | Prepro-alpha2(I) collagen precursor                 | GETGSPGVPAGAVGP         | a                        |
| IPi00382843       | Prion protein                                       | ESQAYYQR                | dt; e                    |
| IPi00382843       | Prion protein                                       | GENFTDVK                | a                        |
| IPi00382843       | Prion protein                                       | VVEQMCTQYER             | at; dt; e                |
| IPi00748556       | PRKCA protein (Fragment)                            | LLNQEEGEYVNPVEGDEEGNMLR | e                        |
| IPi00748556       | PRKCA protein (Fragment)                            | LSVEIWDWR               | e                        |
| IPi00001952       | Probable endonuclease KIAA0830                      | AGCPMLALEVLSK           | a                        |
| IPi00001952       | Probable endonuclease KIAA0830                      | DSDIHEDVMVK             | a                        |
| IPi00001952       | Probable endonuclease KIAA0830                      | ILEVVNQDDEER            | at; e                    |
| IPi00001952       | Probable endonuclease KIAA0830                      | LFMYGPLAGK              | a                        |
| IPi00006166       | Probable G protein-coupled receptor 37              | MRAFPCALLARMSR          | a                        |
| IPi00006166       | Probable G protein-coupled receptor 37              | TVPGASDLFYWPR           | a                        |
| IPi00027228       | Probable glutamyl-tRNA                              | QVFEELVK                | a                        |
| IPi00022613       | Probable nucleolar complex protein 14               | APTSTEANHR              | a                        |
| IPi00022613       | Probable nucleolar complex protein 14               | CPILSLQDVVK             | a                        |
| IPi00022613       | Probable nucleolar complex protein 14               | NSELLVSVAR              | a                        |
| IPi00022613       | Probable nucleolar complex protein 14               | QLCRPLCEK               | a                        |
| IPi00030578       | Probable oxidoreductase KIAA1576                    | AEETFQMIK               | c                        |
| IPi00030578       | Probable oxidoreductase KIAA1576                    | DSVTHLFDR               | c                        |
| IPi00030578       | Probable oxidoreductase KIAA1576                    | EAGKEPAEGGGGDSHR        | c                        |
| IPi00030578       | Probable oxidoreductase KIAA1576                    | EPAGEGGGDSHR            | c                        |
| IPi00025679       | Probable serine/threonine-protein kinase            | EGWSLLEEVLEQQR          | a                        |
| IPi00025679       | Probable serine/threonine-protein kinase            | IPFFMSQDCESLIR          | a                        |

| IPI Accession No. | Protein Description                                               | Peptide Sequence*     | Primary Source Dataset** |
|-------------------|-------------------------------------------------------------------|-----------------------|--------------------------|
| IP100025679       | Probable serine/threonine-protein kinase                          | LDSSNLEK              | a                        |
| IP100025679       | Probable serine/threonine-protein kinase                          | QRVLEGRFR             | a                        |
| IP100002543       | Procollagen C-endopeptidase enhancer 2 precursor                  | LLDALK                | d                        |
| IP100000828       | Proenkephalin A precursor                                         | DAEEDDSLANSDDLK       | a                        |
| IP100000828       | Proenkephalin A precursor                                         | ELLQLSKPELPDQGTSTL    | a                        |
| IP100000828       | Proenkephalin A precursor                                         | IWETCK                | a                        |
| IP100000828       | Proenkephalin A precursor                                         | LPSLK                 | a                        |
| IP100000073       | Pro-epidermal growth factor precursor                             | CQYRDLK               | a                        |
| IP100000073       | Pro-epidermal growth factor precursor                             | HPTQHNLFAMSLFGDR      | a                        |
| IP100000073       | Pro-epidermal growth factor precursor                             | KRLGTAWCSCR           | a                        |
| IP100000073       | Pro-epidermal growth factor precursor                             | RLGTAWCSCR            | a                        |
| IP100219468       | Profilin 2 isoform a                                              | AYSMK                 | d                        |
| IP100219468       | Profilin 2 isoform a                                              | DSLVDGDCMTDIR         | d                        |
| IP100219468       | Profilin 2 isoform a                                              | SQGGEPTYNVAVGR        | c; d; e                  |
| IP100219468       | Profilin 2 isoform a                                              | VLVFMGK               | c; d                     |
| IP100216691       | Profilin-1                                                        | DSLLODGFESMDLR        | d                        |
| IP100216691       | Profilin-1                                                        | TFVNTIPAEVGLVVK       | d                        |
| IP100472584       | Progesterone-induced blocking factor 1                            | DQVTQLSPEDLR          | a                        |
| IP100472584       | Progesterone-induced blocking factor 1                            | HSENSLLTK             | a                        |
| IP100472584       | Progesterone-induced blocking factor 1                            | NLAELSTNK             | a                        |
| IP100472584       | Progesterone-induced blocking factor 1                            | NLTQCQLECEK           | a                        |
| IP100472584       | Progesterone-induced blocking factor 1                            | SERDALEQEVIELRR       | a                        |
| IP100472584       | Progesterone-induced blocking factor 1                            | TNQEIDQLRNASR         | a                        |
| IP100025277       | Programmed cell death protein 6                                   | AGVNFSEFTGVWK         | d                        |
| IP100025277       | Programmed cell death protein 6                                   | YITDQNVFR             | e                        |
| IP100017334       | Prohibitin                                                        | DLQNVNITLR            | d; e                     |
| IP100017334       | Prohibitin                                                        | EFTAEVAK              | c                        |
| IP100017334       | Prohibitin                                                        | FDAGELITQR            | d; e                     |
| IP100017334       | Prohibitin                                                        | IFTSAGEDYDER          | d; e                     |
| IP100017334       | Prohibitin                                                        | NITYLPAGQSVLLQLPQ     | e                        |
| IP100017334       | Prohibitin                                                        | QVAQQAER              | c; d; e                  |
| IP100017334       | Prohibitin                                                        | VLPSTTEILK            | d                        |
| IP100027252       | Prohibitin-2                                                      | AIFENR                | e                        |
| IP100027252       | Prohibitin-2                                                      | AQFLVEK               | e                        |
| IP100027252       | Prohibitin-2                                                      | DLQMVNLSLR            | e                        |
| IP100027252       | Prohibitin-2                                                      | EYTAAVEAK             | e                        |
| IP100027252       | Prohibitin-2                                                      | IPWFQYPIYDIR          | d                        |
| IP100027252       | Prohibitin-2                                                      | IVQAEGEAIAK           | d; e                     |
| IP100027252       | Prohibitin-2                                                      | LGLDYER               | c                        |
| IP100027252       | Prohibitin-2                                                      | LLLGAGAVYVGR          | d; e                     |
| IP100027252       | Prohibitin-2                                                      | QVAQQAQR              | d                        |
| IP100294891       | Proliferating-cell nuclear antigen p120                           | DLAQAALNR             | a                        |
| IP100294891       | Proliferating-cell nuclear antigen p120                           | MPSLLCIPMK            | a                        |
| IP100465255       | Proline-rich acidic protein                                       | AWMETEDTLGR           | a                        |
| IP100020557       | Prolow-density lipoprotein receptor-related protein 1             | CIPSGGLCDNK           | a                        |
| IP100020557       | Prolow-density lipoprotein receptor-related protein 1             | SERPPFEIR             | a                        |
| IP100020557       | Prolow-density lipoprotein receptor-related protein 1             | DLIGDIHGRSFRILVESQ    | a                        |
| IP100020557       | Prolow-density lipoprotein receptor-related protein 1             | LDGSFK                | a                        |
| IP100020557       | Prolow-density lipoprotein receptor-related protein 1             | LERAFMDGSNRK          | a                        |
| IP100020557       | Prolow-density lipoprotein receptor-related protein 1             | LPHITAPPYLSNDLK       | a                        |
| IP100020557       | Prolow-density lipoprotein receptor-related protein 1             | MMPEQCPCPHMTGPR       | a                        |
| IP100020557       | Prolow-density lipoprotein receptor-related protein 1             | NELFLFYGKGRPGIVRG     | a                        |
| IP100020557       | Prolow-density lipoprotein receptor-related protein 1             | QFACR                 | a                        |
| IP100020557       | Prolow-density lipoprotein receptor-related protein 1             | RQVIASDLIR            | a                        |
| IP100020557       | Prolow-density lipoprotein receptor-related protein 1             | TEQPAALALDLVYK        | a                        |
| IP100020557       | Prolow-density lipoprotein receptor-related protein 1             | THANGSIK              | a                        |
| IP100020557       | Prolow-density lipoprotein receptor-related protein 1             | YSTCATYFRCADGTCIP     | a                        |
| IP100020557       | Prolow-density lipoprotein receptor-related protein 1             | VTVDMPR               | a                        |
| IP100020557       | Prolow-density lipoprotein receptor-related protein 1             | YGEDEK                | a                        |
| IP100744115       | propionyl-Coenzyme A carboxylase, alpha polypeptide precursor     | VVEEAPSIFLDAETR       | e                        |
| IP100002280       | proprotein convertase subtilisin/kexin type 1 inhibitor precursor | AEAQEAEDQQR           | c; d; e                  |
| IP100002280       | proprotein convertase subtilisin/kexin type 1 inhibitor precursor | GEAAGAVQELAR          | a; d                     |
| IP100002280       | proprotein convertase subtilisin/kexin type 1 inhibitor precursor | GLSAASPPLAETGAPR      | c                        |
| IP100002280       | proprotein convertase subtilisin/kexin type 1 inhibitor precursor | ILAGSADSEGVAAPR       | d; e                     |
| IP100002280       | proprotein convertase subtilisin/kexin type 1 inhibitor precursor | LETPAQVVAR            | c                        |
| IP100002280       | proprotein convertase subtilisin/kexin type 1 inhibitor precursor | NSDPALGLDDDPDAPAAQLAR | c; d; e                  |
| IP100002280       | proprotein convertase subtilisin/kexin type 1 inhibitor precursor | VLAQLLR               | d                        |
| IP100002280       | ProSAAS precursor                                                 | AGSPLLWGPR            | a                        |
| IP100002280       | ProSAAS precursor                                                 | ARAEAEQEAEDQQR        | a                        |
| IP100002280       | ProSAAS precursor                                                 | MAGSPLLWGPR           | a                        |
| IP100219825       | Prospasin                                                         | DGGFCEVCK             | a; c; e                  |
| IP100219825       | Prospasin                                                         | KLGYLDR               | c                        |
| IP100219825       | Prospasin                                                         | LVGYLDR               | a; d; e                  |
| IP100219825       | Prospasin                                                         | QEHLAALK              | c; d; e                  |
| IP100395565       | prostaglandin E synthase 2 isoform 2                              | EAQQVYGGK             | d; e                     |
| IP100395565       | prostaglandin E synthase 2 isoform 2                              | TPTEALASFDYIVR        | e                        |
| IP100013179       | Prostaglandin-H2 D-isomerase precursor                            | AQGFTEDTIVFLPQTDK     | a                        |
| IP100013179       | Prostaglandin-H2 D-isomerase precursor                            | FTAFCK                | a                        |
| IP100013179       | Prostaglandin-H2 D-isomerase precursor                            | TMLLQFAGLSYSYR        | a; d                     |
| IP100216247       | Proteasome (Prosome, macropain) 26S subunit, non-ATPase, 4        | QRQEEAR               | c                        |
| IP100021435       | Proteasome 26S ATPase subunit 2                                   | THIFKIHAR             | a                        |
| IP100643708       | Protein                                                           | AQNPDAK               | c                        |
| IP100414949       | Protein                                                           | DGSDPYQEPK            | a                        |
| IP100414949       | Protein                                                           | NGRGAAXGAEPGXGG       | a                        |
| IP100414949       | Protein                                                           | TEIXPRDGSDPYQEPK      | a                        |
| IP100414949       | Protein                                                           | TEIXPRDGSDPYQEPK      | a                        |
| IP100289776       | Protein associated with Myc                                       | EELPHCFAGPK           | a                        |
| IP100289776       | Protein associated with Myc                                       | EEWEHAISSK            | a                        |
| IP100289776       | Protein associated with Myc                                       | GDDYDPR               | a                        |
| IP100289776       | Protein associated with Myc                                       | GHIYNTSRIRNR          | a                        |
| IP100289776       | Protein associated with Myc                                       | KATWIGASGDTFLR        | a                        |
| IP100289776       | Protein associated with Myc                                       | RMSLQDQAK             | a                        |
| IP100289776       | Protein associated with Myc                                       | VLGWKDGESTK           | a                        |
| IP100289776       | Protein associated with Myc                                       | VLSMLK                | a                        |
| IP100289776       | Protein associated with Myc                                       | VNSGDTVGSLLR          | a                        |
| IP100020510       | Protein C10orf70                                                  | HNEETGDNVGLIHK        | d                        |
| IP100016634       | Protein C20orf11                                                  | EMILK                 | a                        |

| IPI Accession No. | Protein Description                                               | Peptide Sequence*           | Primary Source Dataset** |
|-------------------|-------------------------------------------------------------------|-----------------------------|--------------------------|
| IP100016634       | Protein C20orf11                                                  | MTDLSKGVIEEPK               | a                        |
| IP100016053       | Protein C20orf128                                                 | GRIVEDFDR                   | a                        |
| IP100043747       | Protein C2orf11                                                   | NSAAPSGQR                   | d                        |
| IP100073958       | Protein C2orf32                                                   | IQPNDFGVYK                  | d                        |
| IP100073958       | Protein C2orf32                                                   | VVYTGTYDTEGVPTK             | d; e                     |
| IP100306413       | Protein CGI-38                                                    | FDESGK                      | c                        |
| IP100031479       | Protein disulfide-isomerase A5 precursor                          | EEYSVR                      | d                        |
| IP100644989       | Protein disulfide-isomerase A6 precursor                          | GSTAPVGGGFPTIVER            | e                        |
| IP100644989       | Protein disulfide-isomerase A6 precursor                          | TGEAIVDAALSALR              | e                        |
| IP100010796       | Protein disulfide-isomerase precursor                             | EADDIVNWLK                  | d                        |
| IP100010796       | Protein disulfide-isomerase precursor                             | ENLLDFIK                    | d                        |
| IP100010796       | Protein disulfide-isomerase precursor                             | ILEFFGLK                    | c; d                     |
| IP100010796       | Protein disulfide-isomerase precursor                             | NFEDVAFDEK                  | c; d                     |
| IP100010796       | Protein disulfide-isomerase precursor                             | YDATEESDLAQQVGR             | d                        |
| IP100298547       | Protein DJ-1                                                      | ALVILAK                     | c                        |
| IP100298547       | Protein DJ-1                                                      | DPVQCSR                     | e                        |
| IP100298547       | Protein DJ-1                                                      | DVVICPDASLEDAKK             | d                        |
| IP100298547       | Protein DJ-1                                                      | EGPYDVVVLPGGNGLGAQNLSESAAVK | d                        |
| IP100298547       | Protein DJ-1                                                      | EILKQENR                    | c                        |
| IP100298547       | Protein DJ-1                                                      | EVAQVVK                     | c; d                     |
| IP100298547       | Protein DJ-1                                                      | GAEMETVTPVDVMR              | c; d; e                  |
| IP100298547       | Protein DJ-1                                                      | VTTHPLAK                    | d                        |
| IP100298547       | Protein DJ-1                                                      | VTYAGLAGKDPVQCSR            | c                        |
| IP100168839       | Protein FAM10A5                                                   | AIDLFTDAIK                  | d                        |
| IP100168839       | Protein FAM10A5                                                   | EWVESMGKK                   | d                        |
| IP100168839       | Protein FAM10A5                                                   | QDPSVLHTEEMR                | c; d                     |
| IP100168839       | Protein FAM10A5                                                   | YPPATQK                     | c                        |
| IP100006093       | Protein FAM38A                                                    | FFHDLHTK                    | a                        |
| IP100006093       | Protein FAM38A                                                    | HRQAIAR                     | a                        |
| IP100006093       | Protein FAM38A                                                    | ISPPSRAQMKR                 | a                        |
| IP1000021923      | Protein FAM3C precursor                                           | LIADLGSTISITNLGFR           | a                        |
| IP1000021923      | Protein FAM3C precursor                                           | MDASLGNLFR                  | a                        |
| IP100077711       | Protein FAM43B                                                    | WKAGPRER                    | a                        |
| IP100303318       | Protein FAM49B                                                    | DAEGILEDLQSYR               | d; e                     |
| IP100303318       | Protein FAM49B                                                    | EAIQHPADEK                  | c; d                     |
| IP100030940       | Protein KIAA0052                                                  | DFRWISSGEYIQMSGRA           | a                        |
| IP100029175       | Protein KIAA0196                                                  | DYAQLGPR                    | a                        |
| IP100029175       | Protein KIAA0196                                                  | TLMNAVSPLK                  | a                        |
| IP100029175       | Protein KIAA0196                                                  | VDPKQLLEDGIR                | a                        |
| IP100029175       | Protein KIAA0196                                                  | VEKNENLQAWFR                | a                        |
| IP100006130       | Protein KIAA0494                                                  | LTYQEIWTSLGSAMPEPE          | a                        |
| IP100297241       | Protein KIAA0539                                                  | DLSVLMDR                    | a                        |
| IP100297241       | Protein KIAA0539                                                  | SVFYLLMK                    | a                        |
| IP100297241       | Protein KIAA0539                                                  | TMVRELHNFLMDLCCS            | a                        |
| IP100163646       | Protein kinase A anchoring protein Hc31                           | IGDVLVNFQSGENAEAR           | a                        |
| IP100163646       | Protein kinase A anchoring protein Hc31                           | QQAQVLEEK                   | a                        |
| IP100163646       | Protein kinase A anchoring protein Hc31                           | SSMRSLSFPR                  | a                        |
| IP100644509       | Protein kinase C and casein kinase substrate in neurons 1         | AGDELTK                     | d                        |
| IP100644509       | Protein kinase C and casein kinase substrate in neurons 1         | ALYVDYDGEQDELSEFK           | c; d                     |
| IP100644509       | Protein kinase C and casein kinase substrate in neurons 1         | AWGAIMTEADK                 | d; e                     |
| IP100644509       | Protein kinase C and casein kinase substrate in neurons 1         | EAEDGFR                     | d                        |
| IP100644509       | Protein kinase C and casein kinase substrate in neurons 1         | ELEQAIR                     | d                        |
| IP100644509       | Protein kinase C and casein kinase substrate in neurons 1         | EMNSK                       | d                        |
| IP100644509       | Protein kinase C and casein kinase substrate in neurons 1         | EVLLDIK                     | d                        |
| IP100644509       | Protein kinase C and casein kinase substrate in neurons 1         | GADAQEDLR                   | c; d; e                  |
| IP100644509       | Protein kinase C and casein kinase substrate in neurons 1         | GPQYGLER                    | d                        |
| IP100644509       | Protein kinase C and casein kinase substrate in neurons 1         | HLNLAENSSYIHVYR             | d                        |
| IP100644509       | Protein kinase C and casein kinase substrate in neurons 1         | KAEGVALTNATGAVESTSQAGDR     | c; d                     |
| IP100644509       | Protein kinase C and casein kinase substrate in neurons 1         | LDSGQLGLYPANVVEAI           | e                        |
| IP100644509       | Protein kinase C and casein kinase substrate in neurons 1         | LGEEDGQWCR                  | c; d; e                  |
| IP100644509       | Protein kinase C and casein kinase substrate in neurons 1         | QDVQK                       | c                        |
| IP100644509       | Protein kinase C and casein kinase substrate in neurons 1         | QIMGGFK                     | d                        |
| IP100644509       | Protein kinase C and casein kinase substrate in neurons 1         | TEQSVTEQOK                  | c; d; e                  |
| IP100644509       | Protein kinase C and casein kinase substrate in neurons 1         | VLEDYVK                     | d; e                     |
| IP100011515       | Protein kinase C and casein kinase substrate in neurons protein 1 | LCNDLMNCVQER                | d                        |
| IP100011515       | Protein kinase C and casein kinase substrate in neurons protein 1 | LVFLK                       | d                        |
| IP100011515       | Protein kinase C and casein kinase substrate in neurons protein 1 | TTPQYMENMEQVFEQCQFEEK       | d                        |
| IP100011515       | Protein kinase C and casein kinase substrate in neurons protein 1 | VSELHQEVK                   | d                        |
| IP10007128        | Protein kinase C gamma type                                       | TFCGTPDIYAPEHAYQPYGK        | e                        |
| IP100419384       | Protein kinase C substrate 80K-H isoform 1                        | AQQEQELAADAFK               | d                        |
| IP100419384       | Protein kinase C substrate 80K-H isoform 1                        | ETMVTTSPTSR                 | d                        |
| IP100419384       | Protein kinase C substrate 80K-H isoform 1                        | LWEEQLAAAK                  | d                        |
| IP100419384       | Protein kinase C substrate 80K-H isoform 1                        | YVAAIR                      | d                        |
| IP100010466       | protein kinase C, beta isoform 1                                  | LTFDFNLMVLGK                | d                        |
| IP100002804       | Protein kinase N2                                                 | ELEISVYWR                   | a                        |
| IP100002804       | Protein kinase N2                                                 | NTNEMFAIKALK                | a                        |
| IP100002804       | Protein kinase N2                                                 | TDLSNDVCAVLK                | a                        |
| IP100056414       | Protein MAL2                                                      | VTLPAGFDLIR                 | d; e                     |
| IP100169345       | Protein NEDD1                                                     | IADSIGNRR                   | c                        |
| IP100304435       | Protein NipSnap1                                                  | EYLEFR                      | d; e                     |
| IP100304435       | Protein NipSnap1                                                  | GWDENVYTYPLVR               | d                        |
| IP100016077       | Protein NipSnap2                                                  | EFLEFR                      | c; d; e                  |
| IP100027423       | Protein phosphatase 1, catalytic subunit, alpha isoform 3         | AHQVVEDGYEYFAK              | d                        |
| IP100747268       | Protein phosphatase 2A, regulatory subunit B' isoform b           | FGSLIPHPVTSG                | e                        |
| IP100747268       | Protein phosphatase 2A, regulatory subunit B' isoform b           | LVALLNLDLR                  | d; e                     |
| IP1000413731      | Protein phosphatase 3                                             | GVGARPAWSLEEEAEG            | a                        |
| IP1000413731      | Protein phosphatase 3                                             | QTHETATVEAVEAR              | a                        |
| IP100645016       | Protein S100-A1                                                   | DVDAYDK                     | c; d                     |
| IP100645016       | Protein S100-A1                                                   | EGDKYK                      | c                        |
| IP100645016       | Protein S100-A1                                                   | ELLQTLESGFLDAQK             | c; d; e                  |
| IP100016179       | Protein S100-A13                                                  | DSLVSNEFK                   | d                        |
| IP100016179       | Protein S100-A13                                                  | DVGLSDEK                    | c; d                     |
| IP100016179       | Protein S100-A13                                                  | ELVTQQLPHLLK                | c                        |
| IP100016179       | Protein S100-A13                                                  | SLDVNQDSELK                 | d                        |
| IP100027463       | Protein S100-A6                                                   | ELTIGSK                     | c                        |
| IP100299399       | Protein S100-B                                                    | AMVALIDVPHOYSGR             | d; e                     |
| IP100299399       | Protein S100-B                                                    | ELINNELSHFLEIK              | d                        |

| IPI Accession No. | Protein Description                                                                      | Peptide Sequence*     | Primary Source Dataset** |
|-------------------|------------------------------------------------------------------------------------------|-----------------------|--------------------------|
| IPI00299399       | Protein S100-B                                                                           | EQEVVDK               | c; d                     |
| IPI00017375       | Protein transport protein Sec23A                                                         | GPVQPPPSNR            | c                        |
| IPI00024664       | Protein transport protein Sec24C                                                         | QLVTSMDVTTETNVFFYPR   | a                        |
| IPI00024661       | Protein transport protein Sec24C                                                         | SAPSQASSFTTPASGGP     | a                        |
| IPI00024661       | Protein transport protein Sec24C                                                         | TGLVRLLCCELK          | a                        |
| IPI00024661       | Protein transport protein Sec24C                                                         | YGFVTVNK              | a                        |
| IPI00024661       | Protein transport protein Sec24C                                                         | YMKLTVVK              | a                        |
| IPI00332887       | Protein tyrosine PhosPhatase,                                                            | GSPDDVEFK             | a                        |
| IPI00332887       | Protein tyrosine PhosPhatase,                                                            | SVLVAAGETATLR         | a; d                     |
| IPI00472249       | Protein tyrosine PhosPhatase, recePtor                                                   | EEQSLPAGAQEALSDDL     | a                        |
| IPI00375548       | Protein tyrosine PhosPhatase, recePtor                                                   | GGPTIDMGQPKVVER       | a                        |
| IPI00375548       | Protein tyrosine PhosPhatase, recePtor                                                   | MVEEVDGRATQK          | a                        |
| IPI00472249       | Protein tyrosine PhosPhatase, recePtor                                                   | RPEASSPARPSKHSVGS     | a                        |
| IPI00375548       | Protein tyrosine PhosPhatase, recePtor                                                   | SGRVFK                | a                        |
| IPI00375548       | Protein tyrosine PhosPhatase, recePtor                                                   | TLVPDQVFAK            | a                        |
| IPI00375548       | Protein tyrosine PhosPhatase, recePtor                                                   | VRAHTSKGPGPYSPVQ      | a                        |
| IPI00107819       | protein tyrosine phosphatase, receptor type, D isoform 4 precursor                       | GPPSEPVLITQSEQAPSSAPR | e                        |
| IPI00748312       | protein tyrosine phosphatase, receptor-type, zeta1 precursor                             | FQGWDK                | d                        |
| IPI00748312       | protein tyrosine phosphatase, receptor-type, zeta1 precursor                             | FSSFEEAVK             | d                        |
| IPI00748312       | protein tyrosine phosphatase, receptor-type, zeta1 precursor                             | GSEFSGK               | d                        |
| IPI00748312       | protein tyrosine phosphatase, receptor-type, zeta1 precursor                             | VDESEK                | d                        |
| IPI00748312       | protein tyrosine phosphatase, receptor-type, zeta1 precursor                             | YSGGVSEMFVK           | d                        |
| IPI00411680       | Protein-L-isospartate (D-aspartate) O-methyltransferase                                  | ALVDVSGSGILTACFAR     | c; d                     |
| IPI00411680       | Protein-L-isospartate (D-aspartate) O-methyltransferase                                  | ELVDDSVNNVR           | d                        |
| IPI00411680       | Protein-L-isospartate (D-aspartate) O-methyltransferase                                  | KDDPTLSSGR            | d                        |
| IPI00411680       | Protein-L-isospartate (D-aspartate) O-methyltransferase                                  | LQDGSIK               | d                        |
| IPI00411680       | Protein-L-isospartate (D-aspartate) O-methyltransferase                                  | VFEVMLATDR            | d                        |
| IPI00411680       | Protein-L-isospartate (D-aspartate) O-methyltransferase                                  | VQLVVGDR              | d; e                     |
| IPI00166845       | protein-tyrosine kinase fyn isoform c                                                    | WTAPEAALYGR           | e                        |
| IPI00219661       | Proteolipid protein 1 isoform 1                                                          | GLLECCAR              | c; d                     |
| IPI00219661       | Proteolipid protein 1 isoform 1                                                          | GLSATVTGGQK           | d; e                     |
| IPI00219661       | Proteolipid protein 1 isoform 1                                                          | GQHQAHSLEK            | c; d                     |
| IPI00219661       | Proteolipid protein 1 isoform 1                                                          | LIETVFSK              | c; d; e                  |
| IPI00219661       | Proteolipid protein 1 isoform 1                                                          | MYGVLPWNAFPGK         | c; d; e                  |
| IPI00219661       | Proteolipid protein 1 isoform 1                                                          | QIFGDYK               | c; d; e                  |
| IPI00219661       | Proteolipid protein 1 isoform 1                                                          | TSASIGSLCADAR         | b; c; d; e               |
| IPI00219661       | Proteolipid protein 1 isoform 1                                                          | TTICGK                | b; d                     |
| IPI00219661       | Proteolipid protein 1 isoform 1                                                          | YCGSNLSICK            | b; c; d; e               |
| IPI00019568       | Prothrombin precursor                                                                    | ALSKHQDFNSAVQLVEN     | a                        |
| IPI00019568       | Prothrombin precursor                                                                    | ELLESYDGR             | a                        |
| IPI00064262       | Protocadherin 16 precursor                                                               | ALDPDGVNSR            | a                        |
| IPI00064262       | Protocadherin 16 precursor                                                               | ENNPFGISLTLR          | a                        |
| IPI00064262       | Protocadherin 16 precursor                                                               | GPRFRFRASSEATR        | a                        |
| IPI00064262       | Protocadherin 16 precursor                                                               | LLRVQVQVQDENHAPA      | a                        |
| IPI00064262       | Protocadherin 16 precursor                                                               | TGALSAPGRDLR          | a                        |
| IPI00030618       | Protocadherin 18 Precursor                                                               | SSPSSPTLR             | a                        |
| IPI0006967        | Protocadherin 9 precursor                                                                | LVNGHTLR              | a                        |
| IPI0006967        | Protocadherin 9 precursor                                                                | QAGGATESPK            | a                        |
| IPI00302641       | Protocadherin Fat 2 precursor                                                            | HFKAIKSYAR            | a                        |
| IPI00302641       | Protocadherin Fat 2 precursor                                                            | RRSNYLVTVETDGR        | a                        |
| IPI00302641       | Protocadherin Fat 2 precursor                                                            | SCSCNGIATRFSGQSYV     | a                        |
| IPI00302641       | Protocadherin Fat 2 precursor                                                            | YRASDWGSPFRK          | a                        |
| IPI00007928       | PRP8 protein                                                                             | DNPMLFNMGCFEGR        | a                        |
| IPI00007928       | PRP8 protein                                                                             | EELGLIEQAYDNLHEALS    | a                        |
| IPI00007928       | PRP8 protein                                                                             | FTADEAR               | a                        |
| IPI00007928       | PRP8 protein                                                                             | NNVNASLTQSEIR         | a                        |
| IPI00007928       | PRP8 protein                                                                             | QLMASGTTFTK           | a                        |
| IPI0166002        | PSD3 protein                                                                             | LEWAVDDEEK            | d; e                     |
| IPI00072044       | FTD012 protein                                                                           | APLVCLPFVSR           | c                        |
| IPI00218568       | Pterin-4-alpha-carbinolamine dehydratase                                                 | AFGFMTK               | c                        |
| IPI00026216       | Puromycin-sensitive aminopeptidase                                                       | AFPCWDEPAIK           | d                        |
| IPI00026216       | Puromycin-sensitive aminopeptidase                                                       | DAESIHQYLLQR          | d                        |
| IPI00026216       | Puromycin-sensitive aminopeptidase                                                       | DNWEELYNR             | d                        |
| IPI00026216       | Puromycin-sensitive aminopeptidase                                                       | KPYPDENLVEVK          | d                        |
| IPI00026216       | Puromycin-sensitive aminopeptidase                                                       | LGLQNDLFSLAR          | e                        |
| IPI00026216       | Puromycin-sensitive aminopeptidase                                                       | LNLGTVGFYR            | d                        |
| IPI00026216       | Puromycin-sensitive aminopeptidase                                                       | NVKPDQWVK             | e                        |
| IPI00026216       | Puromycin-sensitive aminopeptidase                                                       | VTLSPFTLQGTGTGLK      | c                        |
| IPI00026216       | Puromycin-sensitive aminopeptidase                                                       | YAAVTQFEATDAR         | d                        |
| IPI00026216       | Puromycin-sensitive aminopeptidase                                                       | YQGGFLISR             | d                        |
| IPI00217996       | Putative 4 repeat voltage-gated ion                                                      | FNASKTDPVTGAVKNTK     | a                        |
| IPI00217996       | Putative 4 repeat voltage-gated ion                                                      | IIAMSPAGFWQSR         | a                        |
| IPI00217996       | Putative 4 repeat voltage-gated ion                                                      | SLQLELLAR             | a                        |
| IPI00217996       | Putative 4 repeat voltage-gated ion                                                      | VVRELFSGFK            | a                        |
| IPI00182938       | Putative adenosylhomocysteinase 2                                                        | GESEDDFWWCIDR         | d                        |
| IPI00101645       | Putative adenosylhomocysteinase 3                                                        | EIEIAEQEMPALMALR      | d; e                     |
| IPI00302647       | Putative NFkB activating protein                                                         | APPVPAPAR             | a                        |
| IPI00302647       | Putative NFkB activating protein                                                         | GLPTPTAR              | a                        |
| IPI00302647       | Putative NFkB activating protein                                                         | LALYQTAIESAR          | a                        |
| IPI00302647       | Putative NFkB activating protein                                                         | QNSPVAFTAQPK          | a                        |
| IPI00302647       | Putative NFkB activating protein                                                         | TPQSGSAPTAKAPPK       | a                        |
| IPI00470595       | Putative NFkB activating protein                                                         | VHLGEDLK              | c                        |
| IPI00024312       | Putative Rho/Rac guanine nucleotide                                                      | MEEWDRYPR             | a                        |
| IPI00001461       | Putative testis protein CYorf15A                                                         | QIMEK                 | c                        |
| IPI00025340       | Pyridoxal phosphate phosphatase                                                          | AVPGAPELLER           | d                        |
| IPI00025340       | Pyridoxal phosphate phosphatase                                                          | LAGDPSAGDGAAPR        | d                        |
| IPI00025340       | Pyridoxal phosphate phosphatase                                                          | LPGPPDAPGAVFVLGGGLR   | d; e                     |
| IPI00299402       | Pyruvate carboxylase, mitochondrial precursor                                            | AEAEAAQEELSFPR        | d                        |
| IPI00299402       | Pyruvate carboxylase, mitochondrial precursor                                            | DFTATFGPLDSLNTK       | e                        |
| IPI00299402       | Pyruvate carboxylase, mitochondrial precursor                                            | ELIPNIPFQMLLR         | d                        |
| IPI00299402       | Pyruvate carboxylase, mitochondrial precursor                                            | FIGSPPEVVR            | d; e                     |
| IPI00299402       | Pyruvate carboxylase, mitochondrial precursor                                            | FLYCEPWR              | e                        |
| IPI00299402       | Pyruvate carboxylase, mitochondrial precursor                                            | VFDYSEWEGAR           | e                        |
| IPI00306301       | Pyruvate dehydrogenase E1 component alpha subunit, somatic form, mitochondrial precursor | EIEIQEVR              | d; e                     |
| IPI00306301       | Pyruvate dehydrogenase E1 component alpha subunit, somatic form, mitochondrial precursor | EIDVEVR               | d                        |
| IPI00306301       | Pyruvate dehydrogenase E1 component alpha subunit, somatic form, mitochondrial precursor | EILAEITGR             | e                        |
| IPI00306301       | Pyruvate dehydrogenase E1 component alpha subunit, somatic form, mitochondrial precursor | GANKQWIK              | e                        |

| IPi Accession No. | Protein Description                                                                      | Peptide Sequence*      | Primary Source Dataset** |
|-------------------|------------------------------------------------------------------------------------------|------------------------|--------------------------|
| IPi00306301       | Pyruvate dehydrogenase E1 component alpha subunit, somatic form, mitochondrial precursor | GDFIPGLR               | d                        |
| IPi00306301       | Pyruvate dehydrogenase E1 component alpha subunit, somatic form, mitochondrial precursor | LEEGPPYTVLTR           | d                        |
| IPi00306301       | Pyruvate dehydrogenase E1 component alpha subunit, somatic form, mitochondrial precursor | VDGMDLVCVR             | e                        |
| IPi00298423       | Pyruvate dehydrogenase protein X component, mitochondrial precursor                      | HSLDASOGTATGPR         | d                        |
| IPi00479186       | pyruvate kinase 3 isoform 1                                                              | FDEILEASDGMIVAR        | d                        |
| IPi00479186       | pyruvate kinase 3 isoform 1                                                              | FGVEQDVDMVFASFIR       | d                        |
| IPi00479186       | pyruvate kinase 3 isoform 1                                                              | GIFPVLCKDPVQEAWAEDVDLR | d                        |
| IPi00479186       | pyruvate kinase 3 isoform 1                                                              | LAPITSDPTEATAVGAVEASFK | d                        |
| IPi00479186       | pyruvate kinase 3 isoform 1                                                              | NPQIAR                 | d                        |
| IPi00479186       | pyruvate kinase 3 isoform 1                                                              | VLGEK                  | d                        |
| IPi00003590       | Quiescin                                                                                 | DVQNVAAAPELAMGALE      | a                        |
| IPi00003590       | Quiescin                                                                                 | LWGPLEVR               | a                        |
| IPi00742681       | R30783_1                                                                                 | QMFFSNAPRPR            | d                        |
| IPi00396041       | R3HDM2 protein                                                                           | DDASMDR                | c                        |
| IPi00292570       | Rab effector MyRIP                                                                       | ETSDSSEPEEAHITDR       | a                        |
| IPi00292570       | Rab effector MyRIP                                                                       | LSELK                  | a                        |
| IPi00292570       | Rab effector MyRIP                                                                       | RFGSAK                 | a                        |
| IPi00010154       | Rab GDP dissociation inhibitor alpha                                                     | DWNVDLIPK              | c; d; e                  |
| IPi00010154       | Rab GDP dissociation inhibitor alpha                                                     | FLVFVANFDENPK          | d                        |
| IPi00010154       | Rab GDP dissociation inhibitor alpha                                                     | FQLLEGPPESMGR          | d; e                     |
| IPi00010154       | Rab GDP dissociation inhibitor alpha                                                     | IICILSHPIK             | b; d                     |
| IPi00010154       | Rab GDP dissociation inhibitor alpha                                                     | KQNDVFGAEQ             | c; d                     |
| IPi00010154       | Rab GDP dissociation inhibitor alpha                                                     | LYSESLAR               | d                        |
| IPi00010154       | Rab GDP dissociation inhibitor alpha                                                     | MAGTAFDENMK            | c; d                     |
| IPi00010154       | Rab GDP dissociation inhibitor alpha                                                     | MLLYTEVTR              | d; e                     |
| IPi00010154       | Rab GDP dissociation inhibitor alpha                                                     | NPYGGESSITPLEELYK      | d; e                     |
| IPi00010154       | Rab GDP dissociation inhibitor alpha                                                     | NTNDANSCQHPPQNVNR      | d; e                     |
| IPi00010154       | Rab GDP dissociation inhibitor alpha                                                     | QLCDPSYIPDR            | c; d; e                  |
| IPi00010154       | Rab GDP dissociation inhibitor alpha                                                     | QNDVFGAEQ              | c; d; e                  |
| IPi00010154       | Rab GDP dissociation inhibitor alpha                                                     | SEGEVAR                | c; d                     |
| IPi00010154       | Rab GDP dissociation inhibitor alpha                                                     | SPLYLYPLVGLGELPQGFAR   | d; e                     |
| IPi00010154       | Rab GDP dissociation inhibitor alpha                                                     | TDDYLDQPCLVTVNR        | c; d                     |
| IPi00010154       | Rab GDP dissociation inhibitor alpha                                                     | TTEGVDPTQTSMR          | d; e                     |
| IPi00010154       | Rab GDP dissociation inhibitor alpha                                                     | VPSTETALASNLGMFEK      | d                        |
| IPi00010154       | Rab GDP dissociation inhibitor alpha                                                     | VVEGSFVYK              | d                        |
| IPi00010154       | Rab GDP dissociation inhibitor alpha                                                     | VVGVK                  | c                        |
| IPi00010154       | Rab GDP dissociation inhibitor alpha                                                     | YLDFK                  | d                        |
| IPi000031461      | Rab GDP dissociation inhibitor beta                                                      | DLGTSQIFISR            | d; e                     |
| IPi000031461      | Rab GDP dissociation inhibitor beta                                                      | NPYGGESASITPLEDLYK     | d                        |
| IPi000031461      | Rab GDP dissociation inhibitor beta                                                      | TDDYLDQPQCYETNR        | c; d; e                  |
| IPi00005719       | RAB1A, member RAS oncogene family                                                        | EFADSLGIPPLETSAK       | d; e                     |
| IPi00005719       | RAB1A, member RAS oncogene family                                                        | MGPATAGGAEK            | c; d; e                  |
| IPi00005719       | RAB1A, member RAS oncogene family                                                        | NATNVEQSFMTMAAEIK      | d                        |
| IPi00005719       | RAB1A, member RAS oncogene family                                                        | YASENVNK               | d                        |
| IPi00152542       | Rabconnectin                                                                             | DDCLLK                 | a                        |
| IPi00152542       | Rabconnectin                                                                             | LRFQLYNWLEK            | a                        |
| IPi00152542       | Rabconnectin                                                                             | MFEWTRPQQLVCFR         | a                        |
| IPi00152542       | Rabconnectin                                                                             | VGSVLDSR               | a                        |
| IPi00152542       | Rabconnectin                                                                             | VLNFAFNIPNR            | a                        |
| IPi00305282       | RAD50 homologue hRAD50                                                                   | ERKLVDCR               | a                        |
| IPi00305282       | RAD50 homologue hRAD50                                                                   | GPFSEROIK              | a                        |
| IPi00305282       | RAD50 homologue hRAD50                                                                   | HGEKVSLSK              | a                        |
| IPi00305282       | RAD50 homologue hRAD50                                                                   | MEVSLQNEK              | a                        |
| IPi00305282       | RAD50 homologue hRAD50                                                                   | MLIFSVR                | a                        |
| IPi00017367       | Radixin                                                                                  | FFPEDVSEELIQEITQR      | d                        |
| IPi00334126       | Ral GEF with PH domain and SH3                                                           | FQAGNR                 | a                        |
| IPi00472789       | Ran binding protein 2                                                                    | LAAVAQDEEENPSR         | a                        |
| IPi00009645       | Ran-binding protein 17                                                                   | EYPEVIR                | d                        |
| IPi00221325       | Ran-binding protein 2                                                                    | FGQGLPKPINSDFR         | a                        |
| IPi00221325       | Ran-binding protein 2                                                                    | STKRLLK                | a                        |
| IPi00221325       | Ran-binding protein 2                                                                    | STSGEGFQFGK            | a                        |
| IPi00221325       | Ran-binding protein 2                                                                    | SVFGTPTLETANK          | a                        |
| IPi00514622       | Ran-binding protein 6                                                                    | HDLDIIK                | c                        |
| IPi00163931       | Rap guanine nucleotide exchange factor                                                   | ADQQRYSMISK            | a                        |
| IPi00163931       | Rap guanine nucleotide exchange factor                                                   | ETNQLKR                | a                        |
| IPi00163931       | Rap guanine nucleotide exchange factor                                                   | FLEEFENLEREK           | a                        |
| IPi00163931       | Rap guanine nucleotide exchange factor                                                   | MASVNMDPALMFR          | a                        |
| IPi00163931       | Rap guanine nucleotide exchange factor                                                   | NMQK                   | a                        |
| IPi00514917       | Rap1 GTPase-activating protein 1                                                         | DDVFPFGPLPDPVAFR       | e                        |
| IPi00607591       | RAP1, GTP-GDP dissociation stimulator 1                                                  | DQEVLLQTGR             | e                        |
| IPi00607591       | RAP1, GTP-GDP dissociation stimulator 1                                                  | SVAQASLTEQR            | c                        |
| IPi00455620       | rap2 interacting protein x isoform 1                                                     | GLIESALNLR             | e                        |
| IPi00015811       | Ras GTPase-activating protein 2                                                          | IDLWNNGLVQDVFLEGI      | a                        |
| IPi00015811       | Ras GTPase-activating protein 2                                                          | MFQEEGYIAVK            | a                        |
| IPi00015811       | Ras GTPase-activating protein 2                                                          | NILAVEK                | a                        |
| IPi00015811       | Ras GTPase-activating protein 2                                                          | SSKTDLGLSLR            | a                        |
| IPi00015811       | Ras GTPase-activating protein 2                                                          | TDDLGLSR               | a                        |
| IPi00015811       | Ras GTPase-activating protein 2                                                          | FEGLEADADDNSNTR        | a                        |
| IPi00328905       | Ras GTPase-activating-like protein                                                       | GYLVRQEFR              | a                        |
| IPi00009342       | Ras GTPase-activating-like protein                                                       | LQYFRDHINDIK           | a                        |
| IPi00009342       | Ras GTPase-activating-like protein                                                       | RDFADWYLEQLNSDR        | a                        |
| IPi00328905       | Ras GTPase-activating-like protein                                                       | RQACTAQTEPLR           | a                        |
| IPi00328905       | Ras GTPase-activating-like protein                                                       | TVFDEAIR               | c; d; e                  |
| IPi00010270       | Ras-related C3 botulinum toxin substrate 2 precursor                                     | WYPEVR                 | d                        |
| IPi00023138       | Ras-related C3 botulinum toxin substrate 3                                               | AFLTIAEDILR            | d; e                     |
| IPi00016513       | Ras-related protein Rab-10                                                               | NIDEHANEDVER           | d                        |
| IPi00016513       | Ras-related protein Rab-10                                                               | AVPTDEAR               | d                        |
| IPi00429190       | Ras-related protein Rab-11A                                                              | DDEYDYLFK              | d                        |
| IPi00429190       | Ras-related protein Rab-11A                                                              | GAVGALLVYDIAK          | d                        |
| IPi00429190       | Ras-related protein Rab-11A                                                              | NEFNLESK               | d                        |
| IPi00014577       | Ras-related protein Rab-18                                                               | GAQGVILYDVTRR          | a                        |
| IPi00014577       | Ras-related protein Rab-18                                                               | RDITFK                 | d                        |
| IPi00008964       | Ras-related protein Rab-1B                                                               | LLIGDSGVGK             | a                        |
| IPi00008964       | Ras-related protein Rab-1B                                                               | QWLQEDR                | d; e                     |
| IPi00031169       | Ras-related protein Rab-2A                                                               | EIYEK                  | d                        |
| IPi00031169       | Ras-related protein Rab-2A                                                               | KEEGEAFAR              | c                        |
| IPi00031169       | Ras-related protein Rab-2A                                                               | TASNVEEAFINTAK         | d; e                     |



| IPI Accession No. | Protein Description                      | Peptide Sequence*      | Primary Source Dataset** |
|-------------------|------------------------------------------|------------------------|--------------------------|
| IPI00102896       | Ras-related protein Rab-2B               | IGPQQSISTSVGPSASQR     | e                        |
| IPI00102896       | Ras-related protein Rab-2B               | LQIWDTAGQESFR          | e                        |
| IPI00102896       | Ras-related protein Rab-2B               | REEGEAFAR              | d                        |
| IPI00102896       | Ras-related protein Rab-2B               | IQLWDTAGQER            | d                        |
| IPI00021475       | Ras-related protein Rab-33B              |                        |                          |
| IPI00300096       | Ras-related protein Rab-35               | QQQQQQNDVVK            | d; e                     |
| IPI00023504       | Ras-related protein Rab-3A               | DNINVK                 | d                        |
| IPI00023504       | Ras-related protein Rab-3A               | ESSDQNFDMFK            | e                        |
| IPI00023504       | Ras-related protein Rab-3A               | LQIWDTAGQER            | c; d                     |
| IPI00023504       | Ras-related protein Rab-3A               | LVDVICEK               | c; d; e                  |
| IPI00023504       | Ras-related protein Rab-3A               | MISELDTADPAVTGAK       | d                        |
| IPI00023504       | Ras-related protein Rab-3A               | YADDSFTPAFVSTVGDHFK    | d                        |
| IPI00061114       | Ras-related protein Rab-3C               | HEAPMQMASAQDAR         | d; e                     |
| IPI00061114       | Ras-related protein Rab-3C               | LVDHCDK                | d; e                     |
| IPI00032808       | Ras-related protein Rab-3D               | TSFLFR                 | d                        |
| IPI00023510       | Ras-related protein Rab-5A               | NEPQNGANSAR            | c; d; e                  |
| IPI00016339       | Ras-related protein Rab-5C               | FEIWDTAGQER            | c; e                     |
| IPI00016339       | Ras-related protein Rab-5C               | GVDLQENPASR            | c                        |
| IPI00016339       | Ras-related protein Rab-5C               | NEPQATGAPGR            | c; d; e                  |
| IPI00016891       | Ras-related protein Rab-6B               | LQLWDTAGQER            | c                        |
| IPI00016891       | Ras-related protein Rab-6B               | QTIEEGEQR              | d; e                     |
| IPI00016891       | Ras-related protein Rab-6B               | TGYNVK                 | d                        |
| IPI00016342       | Ras-related protein Rab-7                | DEFLIQASPR             | d                        |
| IPI00016342       | Ras-related protein Rab-7                | EAINVEQAFQTIAR         | c; d; e                  |
| IPI00016342       | Ras-related protein Rab-7                | FQSLGVAFYR             | d; e                     |
| IPI00016342       | Ras-related protein Rab-7                | LVTMQIWDTAGQER         | c; e                     |
| IPI00024282       | Ras-related protein Rab-8B               | SSANVEEAFFTLAR         | e                        |
| IPI00004397       | Ras-related protein Rai-B                | VFFDLMR                | c; d; e                  |
| IPI00019345       | Ras-related protein Rap-1A precursor     | EQGQNLAR               | c; d; e                  |
| IPI00019345       | Ras-related protein Rap-1A precursor     | INVNEIFYDLVR           | d                        |
| IPI00019345       | Ras-related protein Rap-1A precursor     | YDPTIEDSYR             | c; d; e                  |
| IPI00019346       | Ras-related protein Rap-2a               | TMVDELFAEIVR           | d; e                     |
| IPI00018364       | Ras-related protein Rap-2b precursor     | ASVDELF AEIVR          | d; e                     |
| IPI00018364       | Ras-related protein Rap-2b precursor     | YDPTIEDFYR             | d; e                     |
| IPI00183675       | RB binding protein                       | YDGDVR                 | a                        |
| IPI00291638       | Rb1-inducible coiled coil protein        | AVSWNKK                | a                        |
| IPI00291638       | Rb1-inducible coiled coil protein        | DLIESLEDR              | a                        |
| IPI00291638       | Rb1-inducible coiled coil protein        | IMLLERTLQK             | a                        |
| IPI00002579       | RB-binding protein                       | DWLQDVEGLQAGGR         | a                        |
| IPI00002579       | RB-binding protein                       | EPLPNGK                | a                        |
| IPI00002579       | RB-binding protein                       | HLRLVTQDAEK            | a                        |
| IPI00002579       | RB-binding protein                       | MRAEAMNIK              | a                        |
| IPI00744902       | Receptor accessory protein 5             | ATVNLGEEK              | d                        |
| IPI00009673       | Receptor expression-enhancing protein 1  | GDGAPAPSGPPPPGSGR      | d; e                     |
| IPI00295577       | Receptor-type tyrosine-protein           | DLTEWRFGQLVPGRK        | a                        |
| IPI00295577       | Receptor-type tyrosine-protein           | DLTEWRFGQLVPGRK        | a                        |
| IPI00004440       | Receptor-type tyrosine-protein           | DTAELPAR               | a                        |
| IPI00465186       | Receptor-type tyrosine-protein           | EDEMPVGR               | a                        |
| IPI00295577       | Receptor-type tyrosine-protein           | EETQVMDDTGLVPGR        | a                        |
| IPI00465186       | Receptor-type tyrosine-protein           | EPMDQK                 | a                        |
| IPI00004440       | Receptor-type tyrosine-protein           | KTMIEGPEVGR            | a                        |
| IPI00004440       | Receptor-type tyrosine-protein           | KTMIEGPEGRDTAELPA      | a                        |
| IPI00465186       | Receptor-type tyrosine-protein           | LIADLQPNTSEYFVLMNR     | a                        |
| IPI00465186       | Receptor-type tyrosine-protein           | RPPNAWHK               | a                        |
| IPI00295577       | Receptor-type tyrosine-protein           | TAPMEVSNLKVTDGSL       | a                        |
| IPI00465186       | Receptor-type tyrosine-protein           | TFALHK                 | a                        |
| IPI00465186       | Receptor-type tyrosine-protein           | TMPVEQVFAK             | a                        |
| IPI00295577       | Receptor-type tyrosine-protein           | TVDPKVGQVSVNSAR        | a                        |
| IPI00017551       | Regucalcin                               | GIAPYSYAG              | c                        |
| IPI00415001       | Regulator of nonsense transcripts 2      | EFLIK                  | a                        |
| IPI00415001       | Regulator of nonsense transcripts 2      | EGLSLIVEQLKNINADR      | a                        |
| IPI00415001       | Regulator of nonsense transcripts 2      | EKDCSER                | a                        |
| IPI00415001       | Regulator of nonsense transcripts 2      | QPFQNLK                | a                        |
| IPI00290652       | Remodeling and spacing factor 1          | AQIDFVLLK              | a                        |
| IPI00290652       | Remodeling and spacing factor 1          | LALLK                  | a                        |
| IPI00290652       | Remodeling and spacing factor 1          | NRNELAETLALLK          | a                        |
| IPI00290652       | Remodeling and spacing factor 1          | QEEQKSEK               | a                        |
| IPI00029628       | Reticulocalbin 2 precursor               | DRFVNDYDK              | a                        |
| IPI00029628       | Reticulocalbin 2 precursor               | LGHEEQK                | a                        |
| IPI00029628       | Reticulocalbin 2 precursor               | VIDFENTALDAAEESF       | a                        |
| IPI00029628       | Reticulocalbin-2 precursor               | LSEEEILENPDILFTEATDYGR | d                        |
| IPI00335276       | Reticulon 4, isoform D                   | GSSGSVVDDL YWR         | a                        |
| IPI00218914       | Retinal dehydrogenase 1                  | GYFVQTFVFSNVTDEMIR     | d                        |
| IPI00218914       | Retinal dehydrogenase 1                  | ILDLESK                | c                        |
| IPI00218914       | Retinal dehydrogenase 1                  | QAFQIGSPWR             | c                        |
| IPI00218914       | Retinal dehydrogenase 1                  | TIPIDGNFFTYTR          | c                        |
| IPI00218914       | Retinal dehydrogenase 1                  | VAFGTGTEVGK            | c                        |
| IPI00337315       | Retinoblastoma binding protein 6 isoform | DYSVLEK                | a                        |
| IPI00337315       | Retinoblastoma binding protein 6 isoform | ENSPERFLPLNIR          | a                        |
| IPI00337315       | Retinoblastoma binding protein 6 isoform | EWYEK                  | a                        |
| IPI00337315       | Retinoblastoma binding protein 6 isoform | GRREDYVGGQSHR          | a                        |
| IPI00337315       | Retinoblastoma binding protein 6 isoform | RIPIGGVK               | a                        |
| IPI00337315       | Retinoblastoma binding protein 6 isoform | SREPTGVEENKTDLSFLVL    | a                        |
| IPI00180305       | Retinoblastoma-associated factor 600     | AVAPGGATRLTDK          | a                        |
| IPI00180305       | Retinoblastoma-associated factor 600     | CSSVK                  | a                        |
| IPI00180305       | Retinoblastoma-associated factor 600     | EKAAPPPPPPPPLESSP      | a                        |
| IPI00180305       | Retinoblastoma-associated factor 600     | HASTSSPADKAK           | a                        |
| IPI00180305       | Retinoblastoma-associated factor 600     | KSSLCRTVEGCR           | a                        |
| IPI00180305       | Retinoblastoma-associated factor 600     | KVWCTTNEGEPMR          | a                        |
| IPI00180305       | Retinoblastoma-associated factor 600     | QVLFPTAQAR             | a                        |
| IPI00180305       | Retinoblastoma-associated factor 600     | RMAMAMROK              | a                        |
| IPI00005791       | Retinoblastoma-associated protein HEC    | LSMQELRSQDVNK          | a                        |
| IPI00005791       | Retinoblastoma-associated protein HEC    | QGLYTPQTK              | a                        |
| IPI00005791       | Retinoblastoma-associated protein HEC    | SVRILK                 | a                        |
| IPI00021363       | Retinoblastoma-binding protein 2         | CVAECSKFR              | a                        |
| IPI00021363       | Retinoblastoma-binding protein 2         | GGFEMVTK               | a                        |
| IPI00021363       | Retinoblastoma-binding protein 2         | LQMLDMGSSLYVELPEL      | a                        |
| IPI00021363       | Retinoblastoma-binding protein 2         | SDAFNMQRQR             | a                        |

| IPI Accession No. | Protein Description                            | Peptide Sequence*   | Primary Source Dataset** |
|-------------------|------------------------------------------------|---------------------|--------------------------|
| IPI00021363       | Retinoblastoma-binding protein 2               | YPENDLFRK           | a                        |
| IPI00304028       | Retinoblastoma-like protein 2                  | EDKSFQNMIR          | a                        |
| IPI00304028       | Retinoblastoma-like protein 2                  | QGQSVTSSSNRPR       | a                        |
| IPI00304028       | Retinoblastoma-like protein 2                  | VQMK                | a                        |
| IPI00332512       | Retinoic acid inducible in neuroblastoma       | AQAEMQSRLLPGPTAR    | a                        |
| IPI00177940       | Retinol dehydrogenase 14                       | LGARVIMGCRDR        | a                        |
| IPI00177940       | Retinol dehydrogenase 14                       | RGDPLMLHIGK         | a                        |
| IPI00177940       | Retinol dehydrogenase 14                       | RLEGITVTVNVLHPGIVR  | a                        |
| IPI00177940       | Retinol dehydrogenase 14                       | TVLITGANSGLGR       | a                        |
| IPI00219718       | Retinol-binding protein I, cellular            | MLVNFEEYLR          | d                        |
| IPI00219718       | Retinol-binding protein I, cellular            | PVDFGTGVWK          | d                        |
| IPI00472086       | REV3-like, catalytic subunit of DNA            | FGCTSLRVPPDLLYQVR   | a                        |
| IPI00472086       | REV3-like, catalytic subunit of DNA            | GNLQMLEQLDLGKTSSEM  | a                        |
| IPI00472086       | REV3-like, catalytic subunit of DNA            | SSETGSK             | a                        |
| IPI00003815       | Rho GDP-dissociation inhibitor 1               | AEYEFLTPVEEAPK      | c; d; e                  |
| IPI00003815       | Rho GDP-dissociation inhibitor 1               | IDKTDYMGVSGYPR      | c; d                     |
| IPI00003815       | Rho GDP-dissociation inhibitor 1               | SIQEIQLDKDDESLR     | c; d                     |
| IPI00169307       | Rho GTPase activating protein 21               | TIQSSNLNEEDTGVTVNR  | e                        |
| IPI00479720       | Rho GTPase activating protein 25 isoform       | AQQELMRQLSILPRDNYN  | a                        |
| IPI00479720       | Rho GTPase activating protein 25 isoform       | QLSILPRDNYNLSLYICR  | a                        |
| IPI00479720       | Rho GTPase activating protein 25 isoform       | YMTMMIR             | a                        |
| IPI00022465       | Rho/rac-interacting citron kinase              | ELQRMLDTEK          | a                        |
| IPI00022465       | Rho/rac-interacting citron kinase              | EVELK               | a                        |
| IPI00022465       | Rho/rac-interacting citron kinase              | GPPTYNEHITK         | a                        |
| IPI00022465       | Rho/rac-interacting citron kinase              | LLMIAGEER           | a                        |
| IPI00022465       | Rho/rac-interacting citron kinase              | LPAGAVR             | a                        |
| IPI00022465       | Rho/rac-interacting citron kinase              | MILDTEK             | a                        |
| IPI00022465       | Rho/rac-interacting citron kinase              | SESVVSGLDSPAKTSSM   | a                        |
| IPI00022542       | Rho-associated protein kinase 1                | DVEMEPVQAEK         | a                        |
| IPI00022542       | Rho-associated protein kinase 1                | NDQWAWETLR          | a                        |
| IPI00022542       | Rho-associated protein kinase 1                | VVKNISGK            | a                        |
| IPI00307155       | Rho-associated protein kinase 2                | ADHEADK             | a                        |
| IPI00307155       | Rho-associated protein kinase 2                | DATIASLEETNR        | a                        |
| IPI00307155       | Rho-associated protein kinase 2                | ELNEMQAQIAEESQIR    | a                        |
| IPI00307155       | Rho-associated protein kinase 2                | HAKNLICAFITDREVR    | a                        |
| IPI00307155       | Rho-associated protein kinase 2                | ILFYDSEQDK          | a                        |
| IPI00307155       | Rho-associated protein kinase 2                | KEQFPVPEVGEKSNYIC   | a                        |
| IPI00307155       | Rho-associated protein kinase 2                | LGRNGVEEIR          | a                        |
| IPI00307155       | Rho-associated protein kinase 2                | NLTLK               | a                        |
| IPI00307155       | Rho-associated protein kinase 2                | VYVDISTAK           | a                        |
| IPI00169307       | Rho-GTPase activating protein 10               | EDPLDRLK            | a                        |
| IPI00169307       | Rho-GTPase activating protein 10               | ELLVSSIFAASR        | a                        |
| IPI00169307       | Rho-GTPase activating protein 10               | ENVEQCHNDTK         | a                        |
| IPI00169307       | Rho-GTPase activating protein 10               | RHITLGGHRDAEISVLNF  | a                        |
| IPI00169307       | Rho-GTPase activating protein 10               | SPTLSCRFALKESPR     | a                        |
| IPI00169307       | Rho-GTPase activating protein 10               | TVAENSEK            | a                        |
| IPI00169307       | Rho-GTPase activating protein 10               | YNAETAKR            | a                        |
| IPI00013988       | Rho-GTPase-activating protein 5                | LQCPFDVDPAGTYPR     | a                        |
| IPI00013988       | Rho-GTPase-activating protein 5                | NFTSKHIEQLK         | a                        |
| IPI00470604       | Rhomboid veinlet-like 5                        | IVDPLAR             | a                        |
| IPI00470604       | Rhomboid veinlet-like 5                        | RTSGAVCHQDPR        | a                        |
| IPI00470604       | Rhomboid veinlet-like 5                        | SDLGQKRTSGAXCHQDP   | a                        |
| IPI00470604       | Rhomboid veinlet-like 5                        | WQESSEK             | a                        |
| IPI00000041       | Rho-related GTP-binding protein RhoB precursor | EVFETATR            | d                        |
| IPI00027434       | Rho-related GTP-binding protein RhoC precursor | QVELALWDTAGQEDYDR   | d                        |
| IPI00017342       | Rho-related GTP-binding protein RhoG precursor | EVFAEAVR            | e                        |
| IPI00386977       | Rhotekin                                       | LSSSLGRSSGKR        | a                        |
| IPI00050069       | Ribonuclease inhibitor                         | ELTVSNNDINEAGVR     | d; e                     |
| IPI00004114       | Ribonuclease K6 precursor                      | LQEAGGDLGR          | a                        |
| IPI00004114       | Ribonuclease K6 precursor                      | LVPVHLSL            | a                        |
| IPI00004114       | Ribonuclease K6 precursor                      | MRSVRLQEAGGDLGR     | a                        |
| IPI00004114       | Ribonuclease K6 precursor                      | QGRGPDVRESDATR      | a                        |
| IPI00004114       | Ribonuclease K6 precursor                      | SASFSRK             | a                        |
| IPI00004114       | Ribonuclease K6 precursor                      | SRVISNDGASR         | a                        |
| IPI00005038       | Ribonuclease UK114                             | AAVQVAALPK          | d                        |
| IPI00005038       | Ribonuclease UK114                             | APGAGVPSQAVLYDR     | c; d                     |
| IPI00219617       | Ribose-phosphate pyrophosphokinase II          | MVLVGDYK            | d                        |
| IPI00329749       | RIN3                                           | LFVLVDGR            | c                        |
| IPI00007343       | RING finger protein 113A                       | ELDEGR              | a                        |
| IPI00251559       | Ring finger protein 20                         | DEEERERER           | a                        |
| IPI00251559       | Ring finger protein 20                         | DEVSLHK             | a                        |
| IPI00251559       | Ring finger protein 20                         | LAEMLDQR            | a                        |
| IPI00251559       | Ring finger protein 20                         | MADEDALR            | a                        |
| IPI00251559       | Ring finger protein 20                         | MSGIGNK             | a                        |
| IPI00012431       | RING finger protein 26                         | EDVMRLSR            | a                        |
| IPI00012431       | RING finger protein 26                         | QDTLPEAGR           | a                        |
| IPI00012431       | RING finger protein 26                         | TIRVTPVR            | a                        |
| IPI00012431       | RING finger protein 26                         | VWRSRLQLASWPNR      | a                        |
| IPI00743882       | RLTPR protein (Fragment)                       | GEELGGAEGDTSSPDPAGR | c                        |
| IPI00175136       | RNA binding motif protein 15B                  | LSHTPELGRVAVYVNR    | a                        |
| IPI00175136       | RNA binding motif protein 15B                  | LTQLK               | a                        |
| IPI00304187       | RNA binding motif protein 28                   | CLLAASPENEAGGLK     | a                        |
| IPI00304187       | RNA binding motif protein 28                   | QCFVTEK             | a                        |
| IPI00304187       | RNA binding motif protein 28                   | RPIVEFSEDR          | a                        |
| IPI00472030       | RNA binding motif protein, Y-linked, family    | DYAYR               | a                        |
| IPI00472030       | RNA binding motif protein, Y-linked, family    | ENYGVPPRR           | a                        |
| IPI00472030       | RNA binding motif protein, Y-linked, family    | GPSRSRGGPPPK        | a                        |
| IPI00472030       | RNA binding motif protein, Y-linked, family    | RENYGVPPR           | a                        |
| IPI00472030       | RNA binding motif protein, Y-linked, family    | SPSGLSRSAR          | a                        |
| IPI00099730       | RNA binding protein                            | DKPRAAPR            | a                        |
| IPI00099730       | RNA binding protein                            | DSRSLSYSPVERR       | a                        |
| IPI00099730       | RNA binding protein                            | DTLKITPRR           | a                        |
| IPI00099730       | RNA binding protein                            | GGSGYHSRSPAR        | a                        |
| IPI00099730       | RNA binding protein                            | IPDHQRTSVPENHAQSR   | a                        |
| IPI00099730       | RNA binding protein                            | NSGPLGTGEMTGFSEV    | a                        |
| IPI00099730       | RNA binding protein                            | SGSPEVK             | a                        |
| IPI00099730       | RNA binding protein                            | SHSHTPSRRMGR        | a                        |

| IPI Accession No. | Protein Description                            | Peptide Sequence*   | Primary Source Dataset** |
|-------------------|------------------------------------------------|---------------------|--------------------------|
| IP10009730        | RNA binding protein                            | SHSRSPATR           | a                        |
| IP10009730        | RNA binding protein                            | SRASPVSRR           | a                        |
| IP10009730        | RNA binding protein                            | YPLSAYERVSGRTSPPLL  | a                        |
| IP100021572       | RNA polymerase II subunit 5-mediating          | TIDDLK              | a                        |
| IP100376867       | RNA polymerase II transcription factor SIII    | MPSWASADR           | a                        |
| IP100376867       | RNA polymerase II transcription factor SIII    | YLTYDQLR            | a                        |
| IP100297723       | RNA-binding protein 6                          | DVSDLDFR            | a                        |
| IP100297723       | RNA-binding protein 6                          | EAPHMNYRDR          | a                        |
| IP100297723       | RNA-binding protein 6                          | GGEGPGHDFR          | a                        |
| IP100297723       | RNA-binding protein 6                          | QDTDYRSMEYR         | a                        |
| IP100297723       | RNA-binding protein 6                          | QSEQLAYLER          | a                        |
| IP100297723       | RNA-binding protein 6                          | REEGQESR            | a                        |
| IP100297723       | RNA-binding protein 6                          | TIMLKRIYR           | a                        |
| IP100297723       | RNA-binding protein 6                          | YSRETDSDR           | a                        |
| IP100217601       | RNF170 protein (Fragment)                      | EQLQTEQDAPAATR      | c                        |
| IP100414117       | Rotatin                                        | LAFDGGKHR           | a                        |
| IP100414117       | Rotatin                                        | VAANALMSLLAVSRAQ    | a                        |
| IP100291351       | RSK-like protein                               | EGIVCR              | a                        |
| IP100291351       | RSK-like protein                               | HPRGYTVYK           | a                        |
| IP100291351       | RSK-like protein                               | MTSVR               | a                        |
| IP100398795       | RTN3-A1                                        | VSGDDVIEK           | a                        |
| IP100293361       | RUN and TBC1 domain containing 1               | KRSSIR              | a                        |
| IP100293361       | RUN and TBC1 domain containing 1               | QVYVGGIEHEIR        | a                        |
| IP100293361       | RUN and TBC1 domain containing 1               | RAAGFMR             | a                        |
| IP100293361       | RUN and TBC1 domain containing 1               | RPALGIRK            | a                        |
| IP100236852       | RUN and TBC1 domain containing 3               | KRNSELSYR           | a                        |
| IP100236852       | RUN and TBC1 domain containing 3               | RNSELVSR            | a                        |
| IP100480033       | SacSin                                         | LGFEAGCK            | a                        |
| IP100480033       | SacSin                                         | LQQTNLK             | a                        |
| IP100480033       | SacSin                                         | LSSAEELSEIK         | a                        |
| IP100480033       | SacSin                                         | MFRDLADFR           | a                        |
| IP100480033       | SacSin                                         | MVQNLLDK            | a                        |
| IP100480033       | SacSin                                         | NICNTTLDEEMVK       | a                        |
| IP100480033       | SacSin                                         | NSEKQLDPNEMRTVK     | a                        |
| IP100480033       | SacSin                                         | VSEISSVPASDRMVQNL   | a                        |
| IP100480033       | SacSin                                         | VTSSEKALK           | a                        |
| IP100480033       | SacSin                                         | WVPACK              | a                        |
| IP100010157       | S-adenosylmethionine synthetase isoform type-2 | FVIGGPGDAGLTGR      | d; e                     |
| IP100010157       | S-adenosylmethionine synthetase isoform type-2 | SAAYAAR             | c                        |
| IP100513941       | SAR1a gene homolog 1                           | WLSQVID             | c                        |
| IP100021417       | SART-1                                         | EEYRGTQDFK          | a                        |
| IP100021417       | SART-1                                         | FHGKGSQK            | a                        |
| IP100021417       | SART-1                                         | HRSGGGSGGGERR       | a                        |
| IP100021417       | SART-1                                         | LRLQAQSLSTVGR       | a                        |
| IP100432771       | SAYY8238                                       | MFLIEK              | c                        |
| IP100300631       | Scaffold attachment factor B                   | ATDLKNLFSK          | a                        |
| IP100300631       | Scaffold attachment factor B                   | ESSTSEGADQK         | d                        |
| IP100300631       | Scaffold attachment factor B                   | LAFQRQR             | a                        |
| IP100300631       | Scaffold attachment factor B                   | MSSPEDSDTK          | a                        |
| IP100300631       | Scaffold attachment factor B                   | RLSRLRVIDL          | a                        |
| IP100300631       | Scaffold attachment factor B                   | SMMGER              | a                        |
| IP100300631       | Scaffold attachment factor B                   | SSCGRNFWVWGLSSTR    | a                        |
| IP100442711       | Scavenger receptor class F, member 2           | CLTCEPGWNGTK        | a                        |
| IP100026800       | Scrapie-responsive protein 1 precursor         | ISFVPCNNQ           | a                        |
| IP100026800       | Scrapie-responsive protein 1 precursor         | LSCYR               | a                        |
| IP100289862       | Secemin-1                                      | DEAWVLETIGK         | d                        |
| IP100289862       | Secemin-1                                      | DEVQEVVYFSAADHEPESK | d                        |
| IP100289862       | Secemin-1                                      | DGLVVFQK            | d                        |
| IP100289862       | Secemin-1                                      | EPAAEIEALLGMDLVR    | d; e                     |
| IP100289862       | Secemin-1                                      | MDAEHPFLR           | d                        |
| IP100289862       | Secemin-1                                      | SIFKPFIFVDDVK       | d                        |
| IP100289862       | Secemin-1                                      | VECTYISIDQVFR       | c; d; e                  |
| IP100306339       | Secreted phosphoprotein 1 osteopontin          | ANDESNHSDVIDSQELS   | a                        |
| IP100306339       | Secreted phosphoprotein 1 osteopontin          | AIPVAQDLNAPSVDVSR   | a                        |
| IP100306339       | Secreted phosphoprotein 1 osteopontin          | DSVETSQLDDQSAETHS   | a                        |
| IP100006601       | Secretogranin I precursor                      | ASEEPEYGEIEK        | a; c                     |
| IP100006601       | Secretogranin I precursor                      | DRADQTVLDEDEK       | a                        |
| IP100006601       | Secretogranin I precursor                      | EDEEEEGENYQK        | a                        |
| IP100006601       | Secretogranin I precursor                      | GEDSSEK             | a                        |
| IP100006601       | Secretogranin I precursor                      | KELELAAMDLEQK       | a                        |
| IP100006601       | Secretogranin I precursor                      | KRLGELFNYYDPLQWK    | a                        |
| IP100006601       | Secretogranin I precursor                      | NVLNVGEEGAPGK       | a                        |
| IP100006601       | Secretogranin I precursor                      | NYPSLELDK           | a                        |
| IP100006601       | Secretogranin I precursor                      | SAEFPDFYDSEEPVSTH   | a                        |
| IP100006601       | Secretogranin I precursor                      | SSAPPTPECR          | a                        |
| IP100006601       | Secretogranin I precursor                      | SSQGGSLPSEK         | a                        |
| IP100607890       | secretogranin II precursor                     | AAWIPHVNR           | c                        |
| IP100607890       | secretogranin II precursor                     | ALEYIENLR           | c                        |
| IP100009362       | Secretogranin II precursor                     | DSLSEEDWMIR         | a                        |
| IP100009362       | Secretogranin II precursor                     | EESSFDYNPYQGVSVPL   | a                        |
| IP100009362       | Secretogranin II precursor                     | ELDLPVLDLIDSEADLDH  | a                        |
| IP100009362       | Secretogranin II precursor                     | ENGDESHLPER         | a                        |
| IP100009362       | Secretogranin II precursor                     | IESQTQEVV           | a                        |
| IP100607890       | secretogranin II precursor                     | IILEALR             | c                        |
| IP100009362       | Secretogranin II precursor                     | LPYGAGR             | a                        |
| IP100607890       | secretogranin II precursor                     | QAENEPOQAPK         | c; e                     |
| IP100607890       | secretogranin II precursor                     | SGQLGQIEDLR         | e                        |
| IP100009362       | Secretogranin II precursor                     | TNEIVEEQYTPQSLATLE  | a                        |
| IP100009362       | Secretogranin II precursor                     | VIAYLK              | d; e                     |
| IP100009362       | Secretogranin II precursor                     | VLEYLNQEK           | a                        |
| IP100009362       | Secretogranin II precursor                     | YPGQSSSEDDIQEEQI    | a                        |
| IP100292071       | Secretogranin III precursor                    | ELSAERPLNEQIAEAEED  | a                        |
| IP100292071       | Secretogranin III precursor                    | LNVEDVDSTK          | a                        |
| IP100305719       | selenium binding protein 1                     | SPQYCVIHR           | b; c; d                  |
| IP100103471       | Selenoprotein M precursor                      | EINALVQELGFYR       | a                        |
| IP100103471       | Selenoprotein M precursor                      | HLPGADPELVLLGR      | a                        |
| IP100023807       | Semaphorin 4D precursor                        | HGTCDECVLAR         | a                        |

| IPI Accession No. | Protein Description                                                    | Peptide Sequence*    | Primary Source Dataset** |
|-------------------|------------------------------------------------------------------------|----------------------|--------------------------|
| IP10002527        | Semaaphorin 7A precursor                                               | DCENYITLLERR         | a                        |
| IP100017469       | Scpiapterin reductase                                                  | DMLFQVLALEEPNVK      | d                        |
| IP100383573       | Septin (Fragment)                                                      | ADCLVPSEIR           | d; e                     |
| IP100383573       | Septin (Fragment)                                                      | MQEMLQR              | d                        |
| IP100748715       | Septin 9                                                               | APVDFGYVGDLSLEQMR    | d                        |
| IP100748715       | Septin 9                                                               | EFDESEDR             | d; e                     |
| IP100748715       | Septin 9                                                               | FINDQYEK             | d                        |
| IP100748715       | Septin 9                                                               | QVENAGAIGPSR         | e                        |
| IP100748715       | Septin 9                                                               | SFEVEEETPNSTPPR      | d; e                     |
| IP100748715       | Septin 9                                                               | SQEATEAAPSCVGMADTPR  | e                        |
| IP100748715       | Septin 9                                                               | STLINTLFK            | d                        |
| IP100748715       | Septin 9                                                               | SVQTFSEER            | d                        |
| IP100748715       | Septin 9                                                               | YLQEEVNINR           | d; e                     |
| IP100019376       | Septin-11                                                              | ELEEENNFQK           | d                        |
| IP100019376       | Septin-11                                                              | ELIEK                | d                        |
| IP100019376       | Septin-11                                                              | FDLLK                | d                        |
| IP100019376       | Septin-11                                                              | FESDPATHNEPGVR       | d                        |
| IP100019376       | Septin-11                                                              | NEFLGELQK            | d                        |
| IP100019376       | Septin-11                                                              | QMFVMR               | d                        |
| IP100019376       | Septin-11                                                              | SYLEQESNVR           | d; e                     |
| IP100014177       | Septin-2                                                               | LYPWGVVVEVENPEHNDFLK | d                        |
| IP100014177       | Septin-2                                                               | STLINSLELTDLYPER     | d; e                     |
| IP100014177       | Septin-2                                                               | THSYDQFER            | d                        |
| IP100014177       | Septin-2                                                               | TVQIEASTVEIEER       | d                        |
| IP100014177       | Septin-2                                                               | VIPGAAEK             | d                        |
| IP100643398       | Serine active site containing 1                                        | TLGLAR               | d; e                     |
| IP100002520       | Serine hydroxymethyltransferase                                        | RISATSIFESMPYK       | a                        |
| IP100002520       | Serine hydroxymethyltransferase                                        | SAITPGGLR            | a                        |
| IP100012344       | Serine kinase                                                          | FWAAAAGVAATR         | a                        |
| IP100012344       | Serine kinase                                                          | HFTEDIQTR            | a                        |
| IP100012344       | Serine kinase                                                          | KGDLK                | a                        |
| IP100478816       | Serine protease inhibitor Kazal-type 5                                 | AEARAR               | a                        |
| IP100478816       | Serine protease inhibitor Kazal-type 5                                 | ECSEFRDQVR           | a                        |
| IP100478816       | Serine protease inhibitor Kazal-type 5                                 | FSEENSK              | a                        |
| IP100478816       | Serine protease inhibitor Kazal-type 5                                 | THGNK                | a                        |
| IP100472421       | Serine/threonine kinase 31 isoform b                                   | HISEER               | a                        |
| IP100472421       | Serine/threonine kinase 31 isoform b                                   | SNQSTFSRPK           | a                        |
| IP100472421       | Serine/threonine kinase 31 isoform b                                   | TYIDTR               | a                        |
| IP10000977        | Serine/threonine protein kinase                                        | DLQPPGGPGR           | a                        |
| IP10000977        | Serine/threonine protein kinase                                        | EIQGLFDELK           | a                        |
| IP10000977        | Serine/threonine protein kinase                                        | ELTLLQOVDRERPHVR     | a                        |
| IP100002850       | Serine/threonine protein phosphatase 2A                                | EQESKNQVHRR          | a                        |
| IP100002850       | Serine/threonine protein phosphatase 2A                                | MEEDIDTR             | a                        |
| IP100002850       | Serine/threonine protein phosphatase 2A                                | MEEDIDTRK            | a                        |
| IP100179415       | Serine/threonine protein phosphatase 2B                                | IRAIGK               | a                        |
| IP100297671       | Serine/threonine-protein kinase 9                                      | AKSHGALSDSK          | a                        |
| IP100297671       | Serine/threonine-protein kinase 9                                      | DSEENEVVK            | a                        |
| IP100297671       | Serine/threonine-protein kinase 9                                      | HSMYVTRDK            | a                        |
| IP100297671       | Serine/threonine-protein kinase 9                                      | SVSNLSEAR            | a                        |
| IP100297671       | Serine/threonine-protein kinase 9                                      | VLGGLPSEQMK          | a                        |
| IP100016690       | Serine/threonine-protein kinase LATS2                                  | QTSFGK               | d                        |
| IP100477763       | Serine/threonine-protein kinase MRCK beta                              | VLFYEEELVR           | e                        |
| IP100021331       | Serine/threonine-protein kinase Nek2                                   | HPNIVRYDR            | a                        |
| IP100021331       | Serine/threonine-protein kinase Nek2                                   | RGQLGEPEK            | a                        |
| IP100302787       | Serine/threonine-protein kinase PLK2                                   | QQIGDAIR             | a                        |
| IP100020904       | Serine/threonine-protein kinase PRKX                                   | VMSIPDVRLK           | d                        |
| IP100171336       | Serine/threonine-protein kinase RIO1                                   | MDYRRLMSR            | a                        |
| IP100171336       | Serine/threonine-protein kinase RIO1                                   | YVSGEFRK             | a                        |
| IP100015974       | Serine/threonine-protein kinase/endoribonuclease IRE1 precursor        | GGRAVVK              | c                        |
| IP100429689       | Serine/threonine-protein phosphatase 2A catalytic subunit beta isoform | ESNVQEVK             | d; e                     |
| IP100429689       | Serine/threonine-protein phosphatase 2A catalytic subunit beta isoform | GGWGISPR             | e                        |
| IP100429689       | Serine/threonine-protein phosphatase 2A catalytic subunit beta isoform | YSFLQDFPAPR          | d; e                     |
| IP100328293       | Serine/arginine repetitive matrix 1                                    | FAECLK               | a                        |
| IP100328293       | Serine/arginine repetitive matrix 1                                    | RWQSPVTK             | a                        |
| IP100298306       | Serine-protein kinase ATM                                              | DSGMAQQRETATKVYDM    | a                        |
| IP100298306       | Serine-protein kinase ATM                                              | FLCK                 | a                        |
| IP100298306       | Serine-protein kinase ATM                                              | FLEVPRFDK            | a                        |
| IP100298306       | Serine-protein kinase ATM                                              | MGTKMMGGGLGFHEVLN    | a                        |
| IP100298306       | Serine-protein kinase ATM                                              | RSNLESSQKSDLLK       | a                        |
| IP100298306       | Serine-protein kinase ATM                                              | STTPANLDESEHFRR      | a                        |
| IP100150881       | Serologically defined breast cancer                                    | DIDEI RTTISDR        | a                        |
| IP100150881       | Serologically defined breast cancer                                    | KKCQK                | a                        |
| IP100150881       | Serologically defined breast cancer                                    | MILEIQSMQGLSK        | a                        |
| IP100093725       | Serologically defined colon cancer                                     | DEEEDS               | a                        |
| IP100093725       | Serologically defined colon cancer                                     | EDPASRIYAK           | a                        |
| IP100093725       | Serologically defined colon cancer                                     | ISEIK                | a                        |
| IP100022463       | Serotransferrin precursor                                              | DLLFRDDTVCLAK        | e                        |
| IP100022463       | Serotransferrin precursor                                              | DYELLCLDGTTR         | d                        |
| IP100022463       | Serotransferrin precursor                                              | ECYYGYTGAFR          | c; d                     |
| IP100022463       | Serotransferrin precursor                                              | FDEFSEGCAPGSK        | c                        |
| IP100022463       | Serotransferrin precursor                                              | MDAKMYLGYEYVTAIRNL   | a                        |
| IP100022463       | Serotransferrin precursor                                              | MYLGYEYVTAIR         | a                        |
| IP100022463       | Serotransferrin precursor                                              | NLNEKDYVELLCLDGTTR   | e                        |
| IP100022463       | Serotransferrin precursor                                              | NPDWAK               | c                        |
| IP100022463       | Serotransferrin precursor                                              | NTYEK                | e                        |
| IP100022463       | Serotransferrin precursor                                              | SASDLTWDNLK          | a; g                     |
| IP100022463       | Serotransferrin precursor                                              | SASDLTWDNLKGGK       | a                        |
| IP100022463       | Serotransferrin precursor                                              | WCAVSEHEATK          | a                        |
| IP100022463       | Serotransferrin precursor                                              | YLGEYVK              | c; d                     |
| IP100745872       | Serum albumin precursor                                                | ADDKETCFAEEGK        | c; d; g                  |
| IP100745872       | Serum albumin precursor                                                | AEFAEVSK             | e                        |
| IP100745872       | Serum albumin precursor                                                | AWAVAR               | a; d                     |
| IP100022434       | Serum albumin precursor                                                | DLGEENFK             | a; c; d                  |
| IP100745872       | Serum albumin precursor                                                | ECCEKPLLEK           | d                        |
| IP100745872       | Serum albumin precursor                                                | FKDLGEENFK           | c; d; g                  |
| IP100745872       | Serum albumin precursor                                                | KYLYEIAIR            | c                        |
| IP100022434       | Serum albumin precursor                                                | LAKTYETILEK          | a; g                     |

| IPI Accession No. | Protein Description                                  | Peptide Sequence*         | Primary Source Dataset** |
|-------------------|------------------------------------------------------|---------------------------|--------------------------|
| IP100745872       | Serum albumin precursor                              | LVAASQAALGL               | d                        |
| IP100022434       | Serum albumin precursor                              | LVNEVTEFAK                | a; c; d; g               |
| IP100745872       | Serum albumin precursor                              | LVTDLTK                   | c; d                     |
| IP100745872       | Serum albumin precursor                              | NECFLQHK                  | d; g                     |
| IP100745872       | Serum albumin precursor                              | NYAEAK                    | c; d                     |
| IP100745872       | Serum albumin precursor                              | SEVAHR                    | d                        |
| IP100745872       | Serum albumin precursor                              | SLHTLFGDK                 | c; d; f; g               |
| IP100745872       | Serum albumin precursor                              | TCVADESAENC DK            | c; d; g                  |
| IP100022434       | Serum albumin precursor                              | TYETILEK                  | a; c; d                  |
| IP100745872       | Serum albumin precursor                              | VHTECCCHGDLLECADDR        | d; g                     |
| IP100745872       | Serum albumin precursor                              | YLVEIAR                   | c; d; e; g               |
| IP100552578       | Serum amyloid A protein precursor                    | SFFSFLGEAFD GAR           | d                        |
| IP100514587       | Seryl-rRNA synthetase                                | YLIATSEQPIAALHR           | d                        |
| IP100328361       | Seryl-rRNA synthetase, mitochondrial precursor       | SADLPAIISTWQELR           | e                        |
| IP100232917       | SET binding factor 2                                 | AGKMTIGR                  | a                        |
| IP100232917       | SET binding factor 2                                 | CRENAEFSR                 | a                        |
| IP100159049       | SET-binding protein                                  | ETASTSK                   | a                        |
| IP100159049       | SET-binding protein                                  | KTIKTINK                  | a                        |
| IP100159049       | SET-binding protein                                  | MEPEEDELGSGR              | a                        |
| IP100159049       | SET-binding protein                                  | MIENESPSVGLTGGNA          | a                        |
| IP100159049       | SET-binding protein                                  | NEGSVPTMTR                | a                        |
| IP100159049       | SET-binding protein                                  | RSYEGFGTYR                | a                        |
| IP100159049       | SET-binding protein                                  | RYSGSGDGGSTR              | a                        |
| IP100297188       | Seven transmembrane helix receptor                   | ATYVPSADVDVQR             | a                        |
| IP100169239       | Seven transmembrane helix receptor                   | CEGLQARDLQRR              | a                        |
| IP100169235       | Seven transmembrane helix receptor                   | DKDEAER                   | a                        |
| IP100169239       | Seven transmembrane helix receptor                   | DLFVLDDSDALPQAWR          | a                        |
| IP100169239       | Seven transmembrane helix receptor                   | EPKPGFEFSK                | a                        |
| IP100386324       | Seven transmembrane helix receptor                   | GAVARQGCRRAR              | a                        |
| IP100169239       | Seven transmembrane helix receptor                   | GRRSPAAGR                 | a                        |
| IP100386324       | Seven transmembrane helix receptor                   | LRCSNGGVYR                | a                        |
| IP100169235       | Seven transmembrane helix receptor                   | LSCDGRS                   | a                        |
| IP100217511       | Seven transmembrane helix receptor                   | QTPER                     | e                        |
| IP100169239       | Seven transmembrane helix receptor                   | RTQLTWRGAPSR              | a                        |
| IP100386324       | Seven transmembrane helix receptor                   | TLDEVLK                   | a                        |
| IP100386324       | Seven transmembrane helix receptor                   | VNGPQADGQPAR              | a                        |
| IP100169235       | Seven transmembrane helix receptor                   | WIGGSPPADQLTVIK           | a                        |
| IP100411765       | SFN protein                                          | VLSIEQK                   | c                        |
| IP100329213       | SH2 containing inositol-5-phosphatase                | DESSGPK                   | a                        |
| IP100329213       | SH2 containing inositol-5-phosphatase                | DQESPKMPR                 | a                        |
| IP100329213       | SH2 containing inositol-5-phosphatase                | HRPEEGPPGPIGR             | a                        |
| IP100329213       | SH2 containing inositol-5-phosphatase                | IVVLAKPEHENR              | a                        |
| IP100329213       | SH2 containing inositol-5-phosphatase                | SFTCSSAAGR                | a                        |
| IP100220490       | SH3 and multiple ankyrin repeat domains              | SDTVATIMR                 | a                        |
| IP100220490       | SH3 and multiple ankyrin repeat domains              | SPEIMSTISGTR              | a                        |
| IP100023832       | SH3 and PX domains 2B                                | QDGLSPK                   | c; d                     |
| IP100514669       | SH3 domain binding glutamic acid-rich protein like 3 | ALAGNPK                   | c; d                     |
| IP100514669       | SH3 domain binding glutamic acid-rich protein like 3 | IQYQLVDISQDNALR           | d; e                     |
| IP100514669       | SH3 domain binding glutamic acid-rich protein like 3 | SQQSEVTR                  | c; d                     |
| IP100514669       | SH3 domain binding glutamic acid-rich protein like 3 | VYSTSVTGRS                | d                        |
| IP100238077       | SH3 domain containing ring finger 1                  | LDASAK                    | d                        |
| IP100025318       | SH3 domain-binding glutamic acid-rich-like protein   | EAEVQAK                   | c; d                     |
| IP100025318       | SH3 domain-binding glutamic acid-rich-like protein   | GDYDAFFEAR                | c                        |
| IP100412272       | SH3 domain-binding glutamic acid-rich-like protein 2 | YCGDYDSFFESK              | d                        |
| IP100019171       | SH3-containing GRB2-like protein 2                   | ALYDFEPENEGELGFK          | c; d; e                  |
| IP100019171       | SH3-containing GRB2-like protein 2                   | ELGDDCNFGPALGEVGEAMR      | d; e                     |
| IP100019171       | SH3-containing GRB2-like protein 2                   | FDESK                     | c; d                     |
| IP100019171       | SH3-containing GRB2-like protein 2                   | GPYYPQAEALLAEAMLK         | d; e                     |
| IP100019171       | SH3-containing GRB2-like protein 2                   | IPDEELR                   | d; e                     |
| IP100019171       | SH3-containing GRB2-like protein 2                   | LDDDFKEMER                | d                        |
| IP100019171       | SH3-containing GRB2-like protein 2                   | QAVQLQQVTVYR              | d; e                     |
| IP100019171       | SH3-containing GRB2-like protein 2                   | TIEVYLQNPASR              | c; e                     |
| IP100394693       | Shb-like adapter protein, Shf                        | EASYLVR                   | a                        |
| IP100394693       | Shb-like adapter protein, Shf                        | ISKAFVDIK                 | a                        |
| IP100394693       | Shb-like adapter protein, Shf                        | SAPCRGTGLEGRS             | a                        |
| IP100394693       | Shb-like adapter protein, Shf                        | SSQGFMMHMKLSRTK           | a                        |
| IP100394693       | Shb-like adapter protein, Shf                        | TGTLGSR                   | a                        |
| IP100152881       | Shroom-related protein                               | AYRNSIKDAQSR              | a                        |
| IP100152881       | Shroom-related protein                               | ERHSVTPAEGDLARPVP         | a                        |
| IP100152881       | Shroom-related protein                               | GGLEGMR                   | a                        |
| IP100152881       | Shroom-related protein                               | SGSMDNTSAR                | a                        |
| IP100152881       | Shroom-related protein                               | SYSEPEK                   | a                        |
| IP100152881       | Shroom-related protein                               | VTIARER                   | a                        |
| IP100383951       | Sidekick-like protein 1                              | ITSGLHSFGRR               | a                        |
| IP100383951       | Sidekick-like protein 1                              | NGVRTSGLHSFGR             | a                        |
| IP100383951       | Sidekick-like protein 1                              | TKDDAPGPPVR               | a                        |
| IP100383951       | Sidekick-like protein 1                              | ELQVGIPVADEAGQR           | d; e                     |
| IP100383951       | Sidekick-like protein 1                              | YYVDSAFHPDTGEK            | e                        |
| IP10003           | sideroflexin 3                                       |                           |                          |
| IP100871988       | sideroflexin 3                                       |                           |                          |
| IP100009368       | Sideroflexin-1                                       | IQESHPELR                 | d                        |
| IP100009368       | Sideroflexin-1                                       | NILLTNEQLESAR             | d; e                     |
| IP100009368       | Sideroflexin-1                                       | QATQVVVSR                 | e                        |
| IP100009368       | Sideroflexin-1                                       | QGIVPPGLTENELWR           | d; e                     |
| IP100009368       | Sideroflexin-1                                       | WDQSTFIGR                 | d; e                     |
| IP100305305       | Signal-induced proliferation-associated              | ALNGEQAAGHAR              | a                        |
| IP100305305       | Signal-induced proliferation-associated              | ELALFR                    | a                        |
| IP100305305       | Signal-induced proliferation-associated              | LLLASKQLGSPADLA           | a                        |
| IP100332887       | signal-regulatory protein alpha precursor            | CTATSLIPVGPQWFR           | d; e                     |
| IP100385310       | SIL protein                                          | TESDNGMMGLSPDAYR          | a                        |
| IP100011982       | Similar to adducin 2                                 | FSEDDPEYMR                | d                        |
| IP100011982       | Similar to adducin 2                                 | IENPNQVPLYTDPQVLEMR       | d                        |
| IP100011982       | Similar to adducin 2                                 | SEVEIPAIVTAFVFEEDGAPVPALR | d                        |
| IP100011982       | Similar to adducin 2                                 | VNVADEVQR                 | d; e                     |
| IP100001091       | Similar to AFG3 ATPase family gene                   | ASLPGGLSPSR               | a                        |
| IP100001091       | Similar to AFG3 ATPase family gene                   | DFVNNYLSKGVVDRLEV         | a                        |
| IP100001091       | Similar to AFG3 ATPase family gene                   | DWNKEREK                  | a                        |
| IP100001091       | Similar to AFG3 ATPase family gene                   | EVMGEK                    | a                        |
| IP100001091       | Similar to AFG3 ATPase family gene                   | RGPAIGRTGR                | a                        |

| IPI Accession No. | Protein Description                                                    | Peptide Sequence*          | Primary Source Dataset** |
|-------------------|------------------------------------------------------------------------|----------------------------|--------------------------|
| IPI0001091        | Similar to AFG3 ATPase family gene                                     | VTFTPGK                    | a                        |
| IPI00221234       | Similar to Aldehyde dehydrogenase family 7 member A1                   | EGGTVVYGGK                 | c                        |
| IPI00221234       | Similar to Aldehyde dehydrogenase family 7 member A1                   | ESGSDAWK                   | c                        |
| IPI00221234       | Similar to Aldehyde dehydrogenase family 7 member A1                   | GEVITTYCPANNEPIAR          | c; d; e                  |
| IPI00221234       | Similar to Aldehyde dehydrogenase family 7 member A1                   | MGGPILPSER                 | c                        |
| IPI00334627       | Similar to annexin A2 isoform 1                                        | GLGTDEDSLIEHCSR            | d                        |
| IPI00334627       | Similar to annexin A2 isoform 1                                        | TPAQYDASELK                | d                        |
| IPI00060473       | Similar to ecotropic viral integration site 5;                         | DARFFRR                    | a                        |
| IPI00060473       | Similar to ecotropic viral integration site 5;                         | EAQALAEGRRLR               | a                        |
| IPI00060473       | Similar to ecotropic viral integration site 5;                         | MSSPCEK                    | a                        |
| IPI00060473       | Similar to ecotropic viral integration site 5;                         | QLQEQQENPR                 | a                        |
| IPI00176637       | Similar to eukaryotic translation initiation factor 2 beta             | EVEPEPTEDKLEADEEDTR        | d                        |
| IPI00747838       | Similar to Forkhead box protein I1                                     | AEASAAVR                   | d                        |
| IPI00884222       | - Similar to Keratin, type 1 cytoskeletal 10                           | GSLGGFFSGGFGSGFSR          | f; g                     |
| IPI00884222       | - Similar to Keratin, type 1 cytoskeletal 10                           | NVQALELEQSQALK             | g                        |
| IPI00884222       | - Similar to Keratin, type 1 cytoskeletal 10                           | SSSKGSLGGFFSGGFGSGFSR      | f; g                     |
| IPI00747543       | Similar to Multiple coagulation factor deficiency protein 2 precursor  | QNTTEEK                    | d                        |
| IPI00744311       | Similar to NADH dehydrogenase (ubiquinone) 1 beta subcomplex, 7, 18kDa | GQGPGEVDPK                 | e                        |
| IPI00748065       | Similar to N-ethylmaleimide-sensitive factor                           | SIDSNPYDTPK                | d                        |
| IPI00165496       | Similar to peptide N-glycanase homolog                                 | FECCSGLVK                  | a                        |
| IPI00165496       | Similar to peptide N-glycanase homolog                                 | IRDLIAERSSR                | a                        |
| IPI00165496       | Similar to peptide N-glycanase homolog                                 | KVETDWHMVLARK              | a                        |
| IPI00746287       | Similar to Protein disulfide-isomerase A3 precursor                    | SEPIPESNDGVPVK             | e                        |
| IPI00457179       | Similar to Ubiquitin-conjugating enzyme E2 M                           | FVFSFK                     | d                        |
| IPI00748475       | Similar to Voltage-dependent anion-selective channel protein 1         | LGGLLEFQA                  | c; d; e                  |
| IPI00748475       | Similar to Voltage-dependent anion-selective channel protein 1         | LTLALLDGK                  | c; d; e                  |
| IPI00464980       | SIN3B long isoform                                                     | EKGSDPAMELR                | a                        |
| IPI00464980       | SIN3B long isoform                                                     | IYGDK                      | a                        |
| IPI00464980       | SIN3B long isoform                                                     | QAQKQLLEYR                 | a                        |
| IPI00464980       | SIN3B long isoform                                                     | QPAIQK                     | a                        |
| IPI00029744       | Single-stranded DNA-binding protein, mitochondrial precursor           | DVAYQYVK                   | d                        |
| IPI00029744       | Single-stranded DNA-binding protein, mitochondrial precursor           | IDYGEYMDK                  | d                        |
| IPI00029744       | Single-stranded DNA-binding protein, mitochondrial precursor           | SGDSEVYQLGDVSQK            | c                        |
| IPI00182728       | SKD1 protein                                                           | DALMQPVR                   | a                        |
| IPI00182728       | SKD1 protein                                                           | RRFEK                      | a                        |
| IPI00479462       | SLC6A11 protein                                                        | ESEAPGGCCSSGGAAPAR         | c; e                     |
| IPI00479462       | SLC6A11 protein                                                        | FYLYPDLRSR                 | e                        |
| IPI00023923       | SLIT-ROBO Rho GTPase activating                                        | LDSPOIRK                   | a                        |
| IPI00023923       | SLIT-ROBO Rho GTPase activating                                        | NLITK                      | a                        |
| IPI00023923       | SLIT-ROBO Rho GTPase activating                                        | SPDSTANVRIEEK              | a                        |
| IPI00023923       | SLIT-ROBO Rho GTPase activating                                        | TYHMYNADSIASQSKLK          | a                        |
| IPI00299147       | Small ubiquitin-related modifier 3 precursor                           | VAGQDGSVVQFK               | c; d                     |
| IPI00479118       | SMC2 protein                                                           | KDKETGGILR                 | a                        |
| IPI00217494       | SMG-7                                                                  | DYSKGITVTK                 | a                        |
| IPI00217494       | SMG-7                                                                  | WGVSDFIK                   | a                        |
| IPI00158992       | SNAP190                                                                | DSMQLIVRWTKSLDPGL          | a                        |
| IPI00158992       | SNAP190                                                                | GTPGSPSGTQEPGRPLG          | a                        |
| IPI00158992       | SNAP190                                                                | LASSRVER                   | a                        |
| IPI00646376       | SNAP91 protein                                                         | ATTHEVMGPK                 | d                        |
| IPI00646376       | SNAP91 protein                                                         | YLNEK                      | d                        |
| IPI00470627       | SNF2 histone linker PHD RING helixase                                  | AVXTSQLQK                  | a                        |
| IPI00470627       | SNF2 histone linker PHD RING helixase                                  | NVIXSATVCHLRPAR            | a                        |
| IPI00470627       | SNF2 histone linker PHD RING helixase                                  | STMTMEELLSLQK              | a                        |
| IPI00107529       | sodium bicarbonate transporter 4 isoform c                             | ESARWIK                    | d                        |
| IPI00020747       | Sodium channel beta-3 subunit precursor                                | DFLIVEYR                   | a; e                     |
| IPI00020747       | Sodium channel beta-3 subunit precursor                                | GPAEHSR                    | a                        |
| IPI00020747       | Sodium channel beta-3 subunit precursor                                | MAQPGDITVKSPGE             | a                        |
| IPI00020747       | Sodium channel beta-3 subunit precursor                                | TTRLIPLR                   | a                        |
| IPI00302840       | Sodium/potassium-transporting ATPase alpha-3 chain                     | ACVHIGTDLK                 | c; d; e                  |
| IPI00302840       | Sodium/potassium-transporting ATPase alpha-3 chain                     | AOEILAR                    | c; d                     |
| IPI00302840       | Sodium/potassium-transporting ATPase alpha-3 chain                     | DFTEQDEILQNHTEIVFAR        | d; e                     |
| IPI00302840       | Sodium/potassium-transporting ATPase alpha-3 chain                     | DVAGDASESALK               | d; e                     |
| IPI00302840       | Sodium/potassium-transporting ATPase alpha-3 chain                     | EAFQNAVLELGGGLGER          | d                        |
| IPI00302840       | Sodium/potassium-transporting ATPase alpha-3 chain                     | EQPLDEEMK                  | d                        |
| IPI00302840       | Sodium/potassium-transporting ATPase alpha-3 chain                     | EQPLDEEMKEAFQNAVLELGGGLGER | d; e                     |
| IPI00302840       | Sodium/potassium-transporting ATPase alpha-3 chain                     | EVAMTEHK                   | c                        |
| IPI00302840       | Sodium/potassium-transporting ATPase alpha-3 chain                     | GGQDNIVLK                  | c; d                     |
| IPI00302840       | Sodium/potassium-transporting ATPase alpha-3 chain                     | GVGIHSEGNETVEDIAAR         | c; d                     |
| IPI00302840       | Sodium/potassium-transporting ATPase alpha-3 chain                     | GVVATGDR                   | c; d                     |
| IPI00302840       | Sodium/potassium-transporting ATPase alpha-3 chain                     | IMESFK                     | d; e                     |
| IPI00302840       | Sodium/potassium-transporting ATPase alpha-3 chain                     | LIFDNLK                    | c; e                     |
| IPI00302840       | Sodium/potassium-transporting ATPase alpha-3 chain                     | LNIPVSQVNP                 | e                        |
| IPI00302840       | Sodium/potassium-transporting ATPase alpha-3 chain                     | LNWDDR                     | d                        |
| IPI00302840       | Sodium/potassium-transporting ATPase alpha-3 chain                     | MQVNAEEVVVDLVEIK           | d                        |
| IPI00302840       | Sodium/potassium-transporting ATPase alpha-3 chain                     | NLEAVETLGSSTICSDDK         | d; e                     |
| IPI00302840       | Sodium/potassium-transporting ATPase alpha-3 chain                     | NPGGWEEK                   | e                        |
| IPI00302840       | Sodium/potassium-transporting ATPase alpha-3 chain                     | QGAIVAVTGDGVNDSPALK        | d; e                     |
| IPI00302840       | Sodium/potassium-transporting ATPase alpha-3 chain                     | RNPGGWEEK                  | c                        |
| IPI00302840       | Sodium/potassium-transporting ATPase alpha-3 chain                     | TGTLTQNR                   | e                        |
| IPI00302840       | Sodium/potassium-transporting ATPase alpha-3 chain                     | TSPQQK                     | c                        |
| IPI00302840       | Sodium/potassium-transporting ATPase alpha-3 chain                     | TVNDLEDSYGQWYEQR           | d                        |
| IPI00302840       | Sodium/potassium-transporting ATPase alpha-3 chain                     | VAEIPFNSTNK                | c; d; e                  |
| IPI00302840       | Sodium/potassium-transporting ATPase alpha-3 chain                     | VDNSSLTGESEPTQR            | c; d; e                  |
| IPI00302840       | Sodium/potassium-transporting ATPase alpha-3 chain                     | VIMVTGDHDIPTAK             | c; d; e                  |
| IPI00302840       | Sodium/potassium-transporting ATPase alpha-3 chain                     | VLGFCHYVLPPEQFPK           | d                        |
| IPI00302840       | Sodium/potassium-transporting ATPase alpha-3 chain                     | VPADLR                     | d; e                     |
| IPI00302840       | Sodium/potassium-transporting ATPase alpha-3 chain                     | YLLVMK                     | c; d; e                  |
| IPI00302840       | Sodium/potassium-transporting ATPase alpha-3 chain                     | YNTDCVQGLTHSK              | d                        |
| IPI00302840       | Sodium/potassium-transporting ATPase alpha-3 chain                     | YQLSHHEDDPNDR              | d; e                     |
| IPI00293971       | Sodium/potassium-transporting ATPase subunit beta-2                    | EFVWNPR                    | d; e                     |
| IPI00293971       | Sodium/potassium-transporting ATPase subunit beta-2                    | INAANIATDDER               | d; e                     |
| IPI00293971       | Sodium/potassium-transporting ATPase subunit beta-2                    | LATPGLMIRPK                | c                        |
| IPI00293971       | Sodium/potassium-transporting ATPase subunit beta-2                    | SCGQVVEEWK                 | d; e                     |
| IPI00012574       | Sodium-dependent phosphate transport protein 3                         | WAPPLER                    | d                        |
| IPI00301180       | Solute carrier family 12 member 5                                      | EIQSTDES                   | e                        |
| IPI00301180       | Solute carrier family 12 member 5                                      | ENLWSSVLTK                 | e                        |
| IPI00301180       | Solute carrier family 12 member 5                                      | LVLNMPGPPR                 | e                        |

| IPI Accession No. | Protein Description                                                                     | Peptide Sequence*  | Primary Source Dataset** |
|-------------------|-----------------------------------------------------------------------------------------|--------------------|--------------------------|
| IP100301180       | Solute carrier family 12 member 5                                                       | NVSMFPGNPER        | e                        |
| IP100025331       | solute carrier family 17, member 7                                                      | FSTPWR             | e                        |
| IP100220194       | Solute carrier family 2, facilitated glucose transporter member 1                       | TFDEIASGFR         | e                        |
| IP100220194       | Solute carrier family 2, facilitated glucose transporter member 1                       | VTLELFR            | e                        |
| IP100645646       | Solute carrier family 25                                                                | QIAADK             | e                        |
| IP100554481       | solute carrier family 3 (activators of dibasic and neutral amino acid transport), membe | ADLLSTQPGR         | d                        |
| IP100554481       | solute carrier family 3 (activators of dibasic and neutral amino acid transport), membe | ELPAQK             | d                        |
| IP100554481       | solute carrier family 3 (activators of dibasic and neutral amino acid transport), membe | GLVLGPIHK          | d                        |
| IP100554481       | solute carrier family 3 (activators of dibasic and neutral amino acid transport), membe | LLTSLPAQLLR        | d; e                     |
| IP100554481       | solute carrier family 3 (activators of dibasic and neutral amino acid transport), membe | VILDTPNVR          | d                        |
| IP100737057       | solute carrier family 4, sodium bicarbonate cotransporter, member 8 isoform a           | FEEDVDEGGER        | e                        |
| IP100299501       | Solute carrier family 5 (Sodium/glucose cotransporter), member 9                        | SRSGGDR            | d                        |
| IP100020131       | Son of sevenless protein homolog 1                                                      | DDTNEYK            | a                        |
| IP100020131       | Son of sevenless protein homolog 1                                                      | IPSETESTASAPNSPR   | a                        |
| IP100020131       | Son of sevenless protein homolog 1                                                      | LTVMYADPNFVR       | a                        |
| IP100216057       | Sorbitol dehydrogenase                                                                  | LENVPIPEPGPNEVLLR  | e                        |
| IP100414264       | sortcin isoform b                                                                       | DMSGTMGFNEFK       | d                        |
| IP100414264       | sortcin isoform b                                                                       | QHFSFDTR           | c; d                     |
| IP100414264       | sortcin isoform b                                                                       | SGTVDPQELQK        | d                        |
| IP100022608       | Sortilin-related receptor precursor                                                     | DEQVLELVR          | a                        |
| IP100022608       | Sortilin-related receptor precursor                                                     | GFLVVGQDPR         | a                        |
| IP100022608       | Sortilin-related receptor precursor                                                     | TDLGDSPLAFEHVMTR   | a                        |
| IP100412713       | Sorting and assembly machinery component 50 homolog                                     | FYLGGPSVVR         | e                        |
| IP100419678       | sorting nexin 14 isoform a                                                              | HIEVVK             | c                        |
| IP100419678       | Sorting nexin 14, isoform a                                                             | ERIPVFCIDVERNDR    | a                        |
| IP100419678       | Sorting nexin 14, isoform a                                                             | IIGPK              | a                        |
| IP100743961       | SOX2-SRY DNA-binding domain (Fragment)                                                  | LISETEK            | d                        |
| IP100014572       | SPARC precursor                                                                         | DEDNNLTEK          | a                        |
| IP100014572       | SPARC precursor                                                                         | LEAGDHPVELLAR      | a                        |
| IP100014572       | SPARC precursor                                                                         | NVLVTLYER          | a                        |
| IP100296777       | SPARC-like protein 1 precursor                                                          | GHQLQLDYFGACK      | a                        |
| IP100296777       | SPARC-like protein 1 precursor                                                          | LLAGDHPDILLR       | a                        |
| IP100219168       | Spectrin beta chain, brain 4                                                            | AEAARR             | a                        |
| IP100219168       | Spectrin beta chain, brain 4                                                            | EAALRRER           | a                        |
| IP100219168       | Spectrin beta chain, brain 4                                                            | EQLQSIQAQWTRLQGR   | a                        |
| IP100219168       | Spectrin beta chain, brain 4                                                            | EVKMNVDGLQDLEHCL   | a                        |
| IP100219168       | Spectrin beta chain, brain 4                                                            | GLMAAHEPSGAR       | a                        |
| IP100219168       | Spectrin beta chain, brain 4                                                            | HEELER             | a                        |
| IP100219168       | Spectrin beta chain, brain 4                                                            | QAMALRGQELEDRR     | a                        |
| IP100219168       | Spectrin beta chain, brain 4                                                            | QQWLQEGLELQK       | a                        |
| IP100219168       | Spectrin beta chain, brain 4                                                            | TLOQQHRR           | a                        |
| IP100219168       | Spectrin beta chain, brain 4                                                            | VLEEKFAFR          | a                        |
| IP100219168       | Spectrin beta chain, brain 4                                                            | VQEAWATLQAK        | a                        |
| IP100219168       | Spectrin beta chain, brain 4                                                            | WORCAESWGLQKLR     | a                        |
| IP100220741       | Spectrin, alpha, erythrocytic 1                                                         | DNVKNRFLNVQELAAAH  | a                        |
| IP100220741       | Spectrin, alpha, erythrocytic 1                                                         | NLAVMSDKVK         | a                        |
| IP100220741       | Spectrin, alpha, erythrocytic 1                                                         | QKLLKQLPQK         | a                        |
| IP100220741       | Spectrin, alpha, erythrocytic 1                                                         | TAAINADELPTDVAGGEV | a                        |
| IP100478292       | Spectrin, alpha, non-erythrocytic 1                                                     | DQLLAAKHVQSKAIEAR  | a                        |
| IP100478292       | Spectrin, alpha, non-erythrocytic 1                                                     | LKGLALQR           | a                        |
| IP100478292       | Spectrin, alpha, non-erythrocytic 1                                                     | NALHER             | a                        |
| IP100478292       | Spectrin, alpha, non-erythrocytic 1                                                     | SKLGESQTLQQFSR     | a                        |
| IP100478292       | Spectrin, alpha, non-erythrocytic 1                                                     | SMAASRR            | a                        |
| IP100217047       | spectrin, beta, non-erythrocytic 4 isoform 2                                            | EAGFGLPAGPSLPQPR   | e                        |
| IP100030738       | Sperm antigen                                                                           | ERSVPRGPNR         | a                        |
| IP100030738       | Sperm antigen                                                                           | SKKSSTSLAFESR      | a                        |
| IP100030738       | Sperm antigen                                                                           | SKKSSTSLAFESRLSR   | a                        |
| IP100030738       | Sperm antigen                                                                           | SVPRGPNR           | a                        |
| IP100022057       | Sperm protein                                                                           | SLTSAEKVGEHLK      | a                        |
| IP100022057       | Sperm protein                                                                           | VDLYNPEGQDDDR      | a                        |
| IP100154567       | Sperm protein SSP411                                                                    | AGAGLAASRRCPGVWP   | a                        |
| IP100154567       | Sperm protein SSP411                                                                    | AQQMALHTLK         | a                        |
| IP100154567       | Sperm protein SSP411                                                                    | AQQMALHTLKMANGGI   | a                        |
| IP100154567       | Sperm protein SSP411                                                                    | FLKRIMFDVASGR      | a                        |
| IP100301364       | S-phase kinase-associated protein 1A isoform b                                          | DDPPPPEDDENKEK     | d                        |
| IP100301364       | S-phase kinase-associated protein 1A isoform b                                          | GKTPEIR            | c                        |
| IP100301364       | S-phase kinase-associated protein 1A isoform b                                          | GLLDVTCK           | d                        |
| IP100301364       | S-phase kinase-associated protein 1A isoform b                                          | NDFTEEEAQVR        | c; d; e                  |
| IP100301364       | S-phase kinase-associated protein 1A isoform b                                          | TDDIPVVDQEFK       | c                        |
| IP100301364       | S-phase kinase-associated protein 1A isoform b                                          | TFNIK              | c                        |
| IP100291306       | Splice Isoform 1 Of                                                                     | AEDSGGNI.GALRVKVR  | a                        |
| IP100069084       | Splice Isoform 1 Of                                                                     | ALNSTNSELQEAACM    | a                        |
| IP100069084       | Splice Isoform 1 Of                                                                     | AQDTPARK           | a                        |
| IP100069084       | Splice Isoform 1 Of                                                                     | ATAPMWRCSR         | a                        |
| IP100398808       | Splice Isoform 1 Of                                                                     | AVATSLDGR          | a                        |
| IP100398808       | Splice Isoform 1 Of                                                                     | DRVALIQWRR         | a                        |
| IP100011219       | Splice Isoform 1 Of                                                                     | EFSVQSSAR          | a                        |
| IP10029           | Splice Isoform 1 Of                                                                     | EKHPSNSPR          | a                        |
| IP100014897       | Splice Isoform 1 Of                                                                     | ELNSLK             | a                        |
| IP100291306       | Splice Isoform 1 Of                                                                     | EMPGAPSPLR         | a                        |
| IP100069084       | Splice Isoform 1 Of                                                                     | EVQSNMVRP          | a                        |
| IP100069084       | Splice Isoform 1 Of                                                                     | FDINDATGDLNANRPVFP | a                        |
| IP100397836       | Splice Isoform 1 Of                                                                     | FKRGQK             | a                        |
| IP100398808       | Splice Isoform 1 Of                                                                     | FYDFWESSAGK        | a                        |
| IP100398808       | Splice Isoform 1 Of                                                                     | GAGPAGMAEPR        | a                        |
| IP100069084       | Splice Isoform 1 Of                                                                     | GMLQLLSNCPAETAHLR  | a                        |
| IP100044749       | Splice Isoform 1 Of                                                                     | KEAYER             | a                        |
| IP10029           | Splice Isoform 1 Of                                                                     | LARSPAR            | a                        |
| IP100069084       | Splice Isoform 1 Of                                                                     | LFPSFNDK           | a                        |
| IP100044749       | Splice Isoform 1 Of                                                                     | LGPNGPSRR          | a                        |
| IP100069084       | Splice Isoform 1 Of                                                                     | LISVFMR            | a                        |
| IP100069084       | Splice Isoform 1 Of                                                                     | MLKESQK            | a                        |
| IP100397836       | Splice Isoform 1 Of                                                                     | NMRESCK            | a                        |
| IP100069084       | Splice Isoform 1 Of                                                                     | NNSPMAANGTPTLR     | a                        |
| IP10029           | Splice Isoform 1 Of                                                                     | RLNDELLGK          | a; d                     |
| IP100011219       | Splice Isoform 1 Of                                                                     | RTQAAAPATEGR       | a                        |
| IP10029           | Splice Isoform 1 Of                                                                     | RTSLCLK            | a                        |



| IPI Accession No. | Protein Description                        | Peptide Sequence*  | Primary Source Dataset** |
|-------------------|--------------------------------------------|--------------------|--------------------------|
| IP100069084       | Splice Isoform 1 Of                        | SEQESGNGR          | a                        |
| IP10029           | Splice Isoform 1 Of                        | SSLPVTEDEK         | a                        |
| IP100398808       | Splice Isoform 1 Of                        | TASFAADPVR         | a                        |
| IP100069084       | Splice Isoform 1 Of                        | TLRNPADSHIVAYR     | a                        |
| IP100069084       | Splice Isoform 1 Of                        | TVLRDEIIAHHK       | a                        |
| IP100291306       | Splice Isoform 1 Of                        | VELWDWDMVGK        | a                        |
| IP100069084       | Splice Isoform 1 Of                        | YFTKEMTAEFYALK     | a                        |
| IP100444592       | Splice Isoform 1 Of 106 kDa O-GlcNAc       | ALVFQGGQVPR        | a                        |
| IP100444592       | Splice Isoform 1 Of 106 kDa O-GlcNAc       | EQQLVNDVCVELR      | a                        |
| IP100444592       | Splice Isoform 1 Of 106 kDa O-GlcNAc       | KPGTPTGSHDLETAL    | a                        |
| IP100444592       | Splice Isoform 1 Of 106 kDa O-GlcNAc       | LKDLLEENVLRSEASQL  | a                        |
| IP100031476       | Splice Isoform 1 Of 85 kDa                 | NSQSGFR            | a                        |
| IP100031476       | Splice Isoform 1 Of 85 kDa                 | SMAYMR             | a                        |
| IP100296362       | Splice Isoform 1 Of Abnormal spindle-like  | AYSIGREQNHLYLTKK   | a                        |
| IP100296362       | Splice Isoform 1 Of Abnormal spindle-like  | DIQNMHRAATLIQSFYR  | a                        |
| IP100296362       | Splice Isoform 1 Of Abnormal spindle-like  | EILLAFSRDFLSEGGDLS | a                        |
| IP100296362       | Splice Isoform 1 Of Abnormal spindle-like  | FLNVRASAIHQ        | a                        |
| IP100296362       | Splice Isoform 1 Of Abnormal spindle-like  | FTSGHK             | a                        |
| IP100296362       | Splice Isoform 1 Of Abnormal spindle-like  | FVQKRAAITLQHYFR    | a                        |
| IP100296362       | Splice Isoform 1 Of Abnormal spindle-like  | IAHEHFLMIK         | a                        |
| IP100296362       | Splice Isoform 1 Of Abnormal spindle-like  | ISYHTMRK           | a                        |
| IP100296362       | Splice Isoform 1 Of Abnormal spindle-like  | KDIQNMHRAATLIQSFYR | a                        |
| IP100296362       | Splice Isoform 1 Of Abnormal spindle-like  | KQFLYR             | a                        |
| IP100296362       | Splice Isoform 1 Of Abnormal spindle-like  | MQTAATLIQSNYR      | a                        |
| IP100296362       | Splice Isoform 1 Of Abnormal spindle-like  | SDGSMEDANVR        | a                        |
| IP100296362       | Splice Isoform 1 Of Abnormal spindle-like  | TDIPRHPMPFAAK      | a                        |
| IP100296362       | Splice Isoform 1 Of Abnormal spindle-like  | TLMMR              | a                        |
| IP100296362       | Splice Isoform 1 Of Abnormal spindle-like  | YATYR              | a                        |
| IP100296362       | Splice Isoform 1 Of Abnormal spindle-like  | YEMLKSTLIQSMFR     | a                        |
| IP100375358       | Splice Isoform 1 Of Activator 1 140 kDa    | ESVSPEDSEKKR       | a                        |
| IP100375358       | Splice Isoform 1 Of Activator 1 140 kDa    | VKTAQVSDERK        | a                        |
| IP100010182       | Splice Isoform 1 Of Acyl-CoA-binding       | SQAEFEK            | a                        |
| IP100010182       | Splice Isoform 1 Of Acyl-CoA-binding       | VEELK              | a; c; d                  |
| IP100010182       | Splice Isoform 1 Of Acyl-CoA-binding       | WDAWNELK           | a; d; e                  |
| IP100220380       | Splice Isoform 1 Of ADAMTS-20              | CNRPEPRNGNYCVGR    | a                        |
| IP100220380       | Splice Isoform 1 Of ADAMTS-20              | ETETRPNGEWGPWEP    | a                        |
| IP100220380       | Splice Isoform 1 Of ADAMTS-20              | GRIIK              | a                        |
| IP100220380       | Splice Isoform 1 Of ADAMTS-20              | MECTDNQIR          | a                        |
| IP100220380       | Splice Isoform 1 Of ADAMTS-20              | RNITCIHSDHVSVDK    | a                        |
| IP100021129       | Splice Isoform 1 Of Adapter-related        | EASADLSPYVRKNAAHAI | a                        |
| IP100021129       | Splice Isoform 1 Of Adapter-related        | QMLESNKDSAK        | a                        |
| IP100021129       | Splice Isoform 1 Of Adapter-related        | SFTSEDDLK          | a                        |
| IP100027721       | Splice Isoform 1 Of Alpha platelet-derived | HFVVEVR            | a                        |
| IP100027721       | Splice Isoform 1 Of Alpha platelet-derived | LVYTLVPEATVKDSGDY  | a                        |
| IP100027721       | Splice Isoform 1 Of Alpha platelet-derived | VTFARVEETIYRCLAK   | a                        |
| IP100014186       | Splice Isoform 1 Of Alpha-fetoprotein      | KSWPQVSR           | a                        |
| IP100014186       | Splice Isoform 1 Of Alpha-fetoprotein      | NSCKTLKCPK         | a                        |
| IP100014186       | Splice Isoform 1 Of Alpha-fetoprotein      | RISFPGSGESPLSK     | a                        |
| IP100014186       | Splice Isoform 1 Of Alpha-fetoprotein      | TAEIKPEQMYQCPYCK   | a                        |
| IP100007722       | Splice Isoform 1 Of AMP deaminase 2        | CFLHQSLPLGAGRR     | a                        |
| IP100007722       | Splice Isoform 1 Of AMP deaminase 2        | RGLDVAEPGSR        | a                        |
| IP100031030       | Splice Isoform 1 Of Amyloid-like protein 2 | EMIFNAER           | a                        |
| IP100031030       | Splice Isoform 1 Of Amyloid-like protein 2 | GGVGEQDQGLIGAEK    | a                        |
| IP100031030       | Splice Isoform 1 Of Amyloid-like protein 2 | VPYVAQEIQEIDELLQE  | a                        |
| IP100043978       | Splice Isoform 1 Of Amyotrophic lateral    | GGSPDQPYRTQDSR     | a                        |
| IP100043978       | Splice Isoform 1 Of Amyotrophic lateral    | RMSMSEGNIR         | a                        |
| IP100002549       | Splice Isoform 1 Of Anaphase promoting     | DFPDSRPAIEDLK      | a                        |
| IP100002549       | Splice Isoform 1 Of Anaphase promoting     | DLFINEYRSLADR      | a                        |
| IP100002549       | Splice Isoform 1 Of Anaphase promoting     | EPPPGTFSVIEERPDOR  | a                        |
| IP100002549       | Splice Isoform 1 Of Anaphase promoting     | SSDIILVSYGSK       | a                        |
| IP100007834       | Splice Isoform 1 Of Ankyrin 2              | AELLESEEGATRPK     | a                        |
| IP100007834       | Splice Isoform 1 Of Ankyrin 2              | ALQKRVEDEQK        | a                        |
| IP100007834       | Splice Isoform 1 Of Ankyrin 2              | HLPVSPSGKTEK       | a                        |
| IP100007834       | Splice Isoform 1 Of Ankyrin 2              | IETMSV R           | a                        |
| IP100007834       | Splice Isoform 1 Of Ankyrin 2              | IIPPRKCTAPTR       | a                        |
| IP100007834       | Splice Isoform 1 Of Ankyrin 2              | LATMPMVEGEGLASR    | a                        |
| IP100007834       | Splice Isoform 1 Of Ankyrin 2              | LSNRDTPQK          | a                        |
| IP100007834       | Splice Isoform 1 Of Ankyrin 2              | SDSNASFLRAAR       | a                        |
| IP100007834       | Splice Isoform 1 Of Ankyrin 2              | TKCPVKTR           | a                        |
| IP100007834       | Splice Isoform 1 Of Ankyrin 2              | VALLLLEK           | a; d                     |
| IP100448465       | Splice Isoform 1 Of Ankyrin repeat         | DKLYSHITEK         | a                        |
| IP100448465       | Splice Isoform 1 Of Ankyrin repeat         | EIEGEKEK           | a                        |
| IP100448465       | Splice Isoform 1 Of Ankyrin repeat         | ENEPEAEK           | a                        |
| IP100448465       | Splice Isoform 1 Of Ankyrin repeat         | QMAILLMQMTAR       | a                        |
| IP100448465       | Splice Isoform 1 Of Ankyrin repeat         | SDVSKEMIK          | a                        |
| IP100448465       | Splice Isoform 1 Of Ankyrin repeat         | SREKMDR            | a                        |
| IP100004233       | Splice Isoform 1 Of Antigen KI-67          | ESMTNEK            | a                        |
| IP100004233       | Splice Isoform 1 Of Antigen KI-67          | FTRTSGETTHTHR      | a                        |
| IP100004233       | Splice Isoform 1 Of Antigen KI-67          | LTQTSGETTHIDKEPVG  | a                        |
| IP100004233       | Splice Isoform 1 Of Antigen KI-67          | QMLDPANYGTGMER     | a                        |
| IP100004233       | Splice Isoform 1 Of Antigen KI-67          | QRVAPR             | a                        |
| IP100004233       | Splice Isoform 1 Of Antigen KI-67          | SEGFRAGDK          | a                        |
| IP100004233       | Splice Isoform 1 Of Antigen KI-67          | SFRYENSLQNGR       | a                        |
| IP100004233       | Splice Isoform 1 Of Antigen KI-67          | TPVQVSOQQNSPQK     | a                        |
| IP100004233       | Splice Isoform 1 Of Antigen KI-67          | TSDIETPSK          | a                        |
| IP100004233       | Splice Isoform 1 Of Antigen KI-67          | VLNNFISNQK         | a                        |
| IP100007334       | Splice Isoform 1 Of Apoptotic chromatin    | EFKEEGEIEPR        | a                        |
| IP100007334       | Splice Isoform 1 Of Apoptotic chromatin    | QEELLRQLRER        | a                        |
| IP100022367       | Splice Isoform 1 Of Astroactin 1           | GNSPSESEER         | a                        |
| IP100180154       | Splice Isoform 1 Of Ataxin-2               | AVPSNMPQQR         | a                        |
| IP100180154       | Splice Isoform 1 Of Ataxin-2               | EEIMESILFK         | a                        |
| IP100180154       | Splice Isoform 1 Of Ataxin-2               | QNSPAGNK           | a                        |
| IP100180154       | Splice Isoform 1 Of Ataxin-2               | RFAAAR             | a                        |
| IP100180154       | Splice Isoform 1 Of Ataxin-2               | SLQRPAR            | a                        |
| IP100328736       | Splice Isoform 1 Of ATP-binding cassette,  | GERLDGFLLLK        | a                        |
| IP100328736       | Splice Isoform 1 Of ATP-binding cassette,  | KDQKPEKMMELFIR     | a                        |
| IP100328736       | Splice Isoform 1 Of ATP-binding cassette,  | KSFLR              | a                        |

| IPI Accession No. | Protein Description                       | Peptide Sequence*   | Primary Source Dataset** |
|-------------------|-------------------------------------------|---------------------|--------------------------|
| IP000328736       | Splice Isoform 1 Of ATP-binding cassette. | RSSNLDK             | a                        |
| IP000328736       | Splice Isoform 1 Of ATP-binding cassette. | LLAIPDPNK           | a                        |
| IP000328736       | Splice Isoform 1 Of ATP-binding cassette. | MMELFIR             | a                        |
| IP000328736       | Splice Isoform 1 Of ATP-binding cassette. | NVDSLARGSPENLR      | a                        |
| IP000152993       | Splice Isoform 1 Of Baculoviral IAP       | AWWVLEPPGARDVEAQL   | a                        |
| IP000152993       | Splice Isoform 1 Of Baculoviral IAP       | DVEAQLR             | a                        |
| IP000152993       | Splice Isoform 1 Of Baculoviral IAP       | GPQPSHWAAGDGPTQE    | a                        |
| IP000152993       | Splice Isoform 1 Of Baculoviral IAP       | MGPKDSAKCLHR        | a                        |
| IP00218019        | Splice Isoform 1 Of Basigin precursor     | GGVVLK              | a                        |
| IP00009054        | Splice Isoform 1 Of Bone morphogenetic    | DRHVSIVR            | a                        |
| IP00009054        | Splice Isoform 1 Of Bone morphogenetic    | GFHLRYTSTK          | a                        |
| IP000456623       | Splice Isoform 1 Of Brevican core protein | ALHPEEDPEGR         | a                        |
| IP000456623       | Splice Isoform 1 Of Brevican core protein | VKGVVFLYR           | a                        |
| IP00003384        | Splice Isoform 1 Of Cadherin EGF LAG      | ARTHLPGCGARAR       | a                        |
| IP00003384        | Splice Isoform 1 Of Cadherin EGF LAG      | EAPISRR             | a                        |
| IP00003384        | Splice Isoform 1 Of Cadherin EGF LAG      | EYVLVQATSAPLVS      | a                        |
| IP00003384        | Splice Isoform 1 Of Cadherin EGF LAG      | IDSATGAVSTDSVLDR    | a                        |
| IP00003384        | Splice Isoform 1 Of Cadherin EGF LAG      | IDSATGAVSTDSVLDR    | a                        |
| IP00003384        | Splice Isoform 1 Of Cadherin EGF LAG      | NIDTGMIR            | a                        |
| IP000395627       | Splice Isoform 1 Of Calyculin-binding     | DLEEVK              | a                        |
| IP000020973       | Splice Isoform 1 Of cAMP-specific         | EHQAAKR             | a                        |
| IP000020973       | Splice Isoform 1 Of cAMP-specific         | KLMSNSLNNSNIPR      | a                        |
| IP000020973       | Splice Isoform 1 Of cAMP-specific         | KVTSSGVLDDNSDR      | a                        |
| IP000011062       | Splice Isoform 1 Of Carbamoyl-phosphate   | FSRPGIR             | a                        |
| IP000011062       | Splice Isoform 1 Of Carbamoyl-phosphate   | RGVLK               | a                        |
| IP000011062       | Splice Isoform 1 Of Carbamoyl-phosphate   | SAYALGGLGSGICPNR    | a                        |
| IP000016457       | Splice Isoform 1 Of Carnitine             | AHQDALPR            | a                        |
| IP000016457       | Splice Isoform 1 Of Carnitine             | IWNSSLQTNK          | a                        |
| IP000016457       | Splice Isoform 1 Of Carnitine             | LAHYLEK             | a                        |
| IP000016457       | Splice Isoform 1 Of Carnitine             | QDFVLDLQGLR         | a                        |
| IP000027734       | Splice Isoform 1 Of Cat eye syndrome      | LGTPEEK             | a                        |
| IP000301317       | Splice Isoform 1 Of Catenin delta-2       | SKGDKHSPK           | a                        |
| IP000160622       | Splice Isoform 1 Of Centrosomal protein 2 | AAHEK               | a                        |
| IP000160622       | Splice Isoform 1 Of Centrosomal protein 2 | ALTLVR              | a                        |
| IP000160622       | Splice Isoform 1 Of Centrosomal protein 2 | ATASSPTQDGRGQKNS    | a                        |
| IP000160622       | Splice Isoform 1 Of Centrosomal protein 2 | EPNGSGRMDGREPAQLL   | a                        |
| IP000160622       | Splice Isoform 1 Of Centrosomal protein 2 | LDSLEPLRQK          | a                        |
| IP000160622       | Splice Isoform 1 Of Centrosomal protein 2 | NSDAKCVAELOK        | a                        |
| IP000160622       | Splice Isoform 1 Of Centrosomal protein 2 | QDVYTR              | a                        |
| IP000160622       | Splice Isoform 1 Of Centrosomal protein 2 | SQGDLEKAELODR       | a                        |
| IP000160622       | Splice Isoform 1 Of Centrosomal protein 2 | TQELEK              | a                        |
| IP000306710       | Splice Isoform 1 Of Chordin precursor     | GAGPEPVLPIR         | a                        |
| IP000306710       | Splice Isoform 1 Of Chordin precursor     | GGTGEVHCEKVCQPR     | a                        |
| IP000217439       | Splice Isoform 1 Of Codanin 1             | ALLPEETPAVLSAENIA   | a                        |
| IP000217439       | Splice Isoform 1 Of Codanin 1             | GGRGLEEGVSGESLPGA   | a                        |
| IP000217439       | Splice Isoform 1 Of Codanin 1             | GTLKLLAENRLLCFSPA   | a                        |
| IP000217439       | Splice Isoform 1 Of Codanin 1             | SGAPGCRTKPSR        | a                        |
| IP000376439       | Splice Isoform 1 Of Cohen syndrome        | AILTPLYLIDFSVR      | a                        |
| IP000376439       | Splice Isoform 1 Of Cohen syndrome        | DMLGNITGSEDETR      | a                        |
| IP000376439       | Splice Isoform 1 Of Cohen syndrome        | ENGFCTR             | a                        |
| IP000376439       | Splice Isoform 1 Of Cohen syndrome        | GDEDSWR             | a                        |
| IP000376439       | Splice Isoform 1 Of Cohen syndrome        | IHSFNIDHYR          | a                        |
| IP000376439       | Splice Isoform 1 Of Cohen syndrome        | IGSVAMAPQADNPLGRS   | a                        |
| IP000376439       | Splice Isoform 1 Of Cohen syndrome        | LCTLNEGK            | a                        |
| IP000376439       | Splice Isoform 1 Of Cohen syndrome        | NSQNPALWMDSSIR      | a                        |
| IP000376439       | Splice Isoform 1 Of Cohen syndrome        | STAESTK             | a                        |
| IP000376439       | Splice Isoform 1 Of Cohen syndrome        | VSLWMQWVLPK         | a                        |
| IP000018353       | Splice Isoform 1 Of Cohesin subunit SA-3  | LKDWEGLTSLLEK       | a                        |
| IP000018353       | Splice Isoform 1 Of Cohesin subunit SA-3  | QSPGAQR             | a                        |
| IP000329573       | Splice Isoform 1 Of Collagen alpha 1(XII) | DEGVLEFAIGKNADEVEL  | a                        |
| IP000329573       | Splice Isoform 1 Of Collagen alpha 1(XII) | ITYQSTEGEGNEQITIG   | a                        |
| IP000329573       | Splice Isoform 1 Of Collagen alpha 1(XII) | MGEKLR              | a                        |
| IP000029739       | Splice Isoform 1 Of Complement factor H   | YQCK                | a                        |
| IP000020977       | Splice Isoform 1 Of Connective tissue     | LPSDPCFPR           | a                        |
| IP000029751       | Splice Isoform 1 Of Contactin 1 precursor | DAKTDPIIEGNMEAR     | a                        |
| IP000029751       | Splice Isoform 1 Of Contactin 1 precursor | VTVINPDTGR          | a                        |
| IP000400774       | Splice Isoform 1 Of Dachshund homolog     | AIVQK               | a                        |
| IP000400774       | Splice Isoform 1 Of Dachshund homolog     | LYLK                | a                        |
| IP000400774       | Splice Isoform 1 Of Dachshund homolog     | LYLKTVMY            | a                        |
| IP000400774       | Splice Isoform 1 Of Dachshund homolog     | QVQLEKTELKMDFLR     | a                        |
| IP000400774       | Splice Isoform 1 Of Dachshund homolog     | SSSVSSSPARTESSDR    | a                        |
| IP000400774       | Splice Isoform 1 Of Dachshund homolog     | VPDPSPAISLEGR       | a                        |
| IP000297415       | Splice Isoform 1 Of Dedicator of          | CCIPELLMSVRFLLSQES  | a                        |
| IP000151888       | Splice Isoform 1 Of Dedicator of          | DFERLAHLVDTLHR      | a                        |
| IP000297415       | Splice Isoform 1 Of Dedicator of          | EGVPDNK             | a                        |
| IP000297415       | Splice Isoform 1 Of Dedicator of          | ETWREGVSLIATVTR     | a                        |
| IP00022449        | Splice Isoform 1 Of Dedicator of          | FAETMNQK            | a                        |
| IP000297415       | Splice Isoform 1 Of Dedicator of          | HKHSRENSCLSPR       | a                        |
| IP000151888       | Splice Isoform 1 Of Dedicator of          | INVRDVSPEFPVNAGMTVK | a                        |
| IP00022449        | Splice Isoform 1 Of Dedicator of          | KDYPHLVDRITVVVAR    | a                        |
| IP000297415       | Splice Isoform 1 Of Dedicator of          | LGFSNHIMPGEIRNDLYTT | a                        |
| IP000297415       | Splice Isoform 1 Of Dedicator of          | LLDYRDCMK           | a                        |
| IP00022449        | Splice Isoform 1 Of Dedicator of          | LPGLR               | a                        |
| IP000297415       | Splice Isoform 1 Of Dedicator of          | LWHIMNEILLDR        | a                        |
| IP00022449        | Splice Isoform 1 Of Dedicator of          | MSCTVNLNLFYKDNRE    | a                        |
| IP000151888       | Splice Isoform 1 Of Dedicator of          | NADSRGSLISTDSGNSLP  | a                        |
| IP00022449        | Splice Isoform 1 Of Dedicator of          | RPPGVAVMDITDIK      | a                        |
| IP000151888       | Splice Isoform 1 Of Dedicator of          | SRGGVFR             | a                        |
| IP000151888       | Splice Isoform 1 Of Dedicator of          | VTEVMHSGR           | a                        |
| IP000151888       | Splice Isoform 1 Of Dedicator of          | YEDYSGEFR           | a                        |
| IP000031549       | Splice Isoform 1 Of Desmocollin 3         | LEADK               | a                        |
| IP000031549       | Splice Isoform 1 Of Desmocollin 3         | QEEGLDFLNNLEPK      | a                        |
| IP000013933       | Splice Isoform 1 Of Desmoplakin           | AESGPDLR            | a                        |
| IP000013933       | Splice Isoform 1 Of Desmoplakin           | GVITDQNSDGYCQTGTM   | a                        |
| IP000013933       | Splice Isoform 1 Of Desmoplakin           | ISTIEGIER           | a                        |
| IP000013933       | Splice Isoform 1 Of Desmoplakin           | KSLLATMKTELQK       | a                        |
| IP000013933       | Splice Isoform 1 Of Desmoplakin           | LLEAQIATGGIIPKESH   | a                        |

| IPI Accession No. | Protein Description                         | Peptide Sequence*  | Primary Source Dataset** |
|-------------------|---------------------------------------------|--------------------|--------------------------|
| IP100013933       | Splice Isoform 1 Of Desmoplakin             | MSQLEVKEK          | a                        |
| IP100013933       | Splice Isoform 1 Of Desmoplakin             | NDYDQLQK           | a                        |
| IP100013933       | Splice Isoform 1 Of Desmoplakin             | REDDLKQOR          | a                        |
| IP100013933       | Splice Isoform 1 Of Desmoplakin             | YEVTSGGGTSRMYYSR   | a                        |
| IP100299301       | Splice Isoform 1 Of Desmuslin               | EQERNRPETIR        | a                        |
| IP100299301       | Splice Isoform 1 Of Desmuslin               | HIAPGPK            | a                        |
| IP100299301       | Splice Isoform 1 Of Desmuslin               | NTEAQVK            | a                        |
| IP100299301       | Splice Isoform 1 Of Desmuslin               | TFVLAGSADSPGLKGLAD | a                        |
| IP100396241       | Splice Isoform 1 Of Diaphanous protein      | ITSFRKSTVK         | a                        |
| IP100396241       | Splice Isoform 1 Of Diaphanous protein      | LLGATTTAAER        | a                        |
| IP100396241       | Splice Isoform 1 Of Diaphanous protein      | MISFTK             | a                        |
| IP100396241       | Splice Isoform 1 Of Diaphanous protein      | SADQKTTLLHFADICEEK | a                        |
| IP100301512       | Splice Isoform 1 Of Dipeptidyl              | AQAAAPRER          | a                        |
| IP100301512       | Splice Isoform 1 Of Dipeptidyl              | KIESLR             | a                        |
| IP100301512       | Splice Isoform 1 Of Dipeptidyl              | RLGLEEKDQMEAVR     | a                        |
| IP100012593       | Splice Isoform 1 Of DNA                     | CHGVLRRR           | a                        |
| IP100012593       | Splice Isoform 1 Of DNA                     | ERHRSPRSTR         | a                        |
| IP100012593       | Splice Isoform 1 Of DNA                     | FLECNPMIDAIVKSAAH  | a                        |
| IP100012593       | Splice Isoform 1 Of DNA                     | QKLLGR             | a                        |
| IP100012593       | Splice Isoform 1 Of DNA                     | WVQWFGDGK          | a                        |
| IP100012593       | Splice Isoform 1 Of DNA                     | YENK               | a                        |
| IP100384456       | Splice Isoform 1 Of DNA mismatch repair     | FFIGQFSDRRHCSR     | a                        |
| IP100384456       | Splice Isoform 1 Of DNA mismatch repair     | FFIGQFSDRRHCSRFR   | a                        |
| IP100384456       | Splice Isoform 1 Of DNA mismatch repair     | KMAHISK            | a                        |
| IP100384456       | Splice Isoform 1 Of DNA mismatch repair     | MNQLRLFR           | a                        |
| IP100384456       | Splice Isoform 1 Of DNA mismatch repair     | QATSISSETK         | a                        |
| IP100384456       | Splice Isoform 1 Of DNA mismatch repair     | RMVTGNSLTK         | a                        |
| IP100028061       | Splice Isoform 1 Of Dual specificity        | ENGFLEPR           | a                        |
| IP100028061       | Splice Isoform 1 Of Dual specificity        | ILGPIPKHMQKTR      | a                        |
| IP100028061       | Splice Isoform 1 Of Dual specificity        | SHSSAQENKR         | a                        |
| IP100033022       | Splice Isoform 1 Of Dynamitin 2             | EVEEYK             | a; e                     |
| IP100174025       | Splice Isoform 1 Of Dynamitin binding       | DLDMYSRAQEELNMLE   | a                        |
| IP100174025       | Splice Isoform 1 Of Dynamitin binding       | DLEMCIER           | a                        |
| IP100174025       | Splice Isoform 1 Of Dynamitin binding       | IYCNHDEAIALLEIYEK  | a                        |
| IP100174025       | Splice Isoform 1 Of Dynamitin binding       | WLDNGVTK           | a                        |
| IP100219532       | Splice Isoform 1 Of Engulfment and cell     | HECFPGR            | a                        |
| IP100219532       | Splice Isoform 1 Of Engulfment and cell     | TWKEMR             | a                        |
| IP100008918       | Splice Isoform 1 Of Epithelial protein lost | ELSVEEQIK          | a                        |
| IP100008918       | Splice Isoform 1 Of Epithelial protein lost | MESSPFRNR          | a                        |
| IP100008918       | Splice Isoform 1 Of Epithelial protein lost | MESSPFRNRQWTSLSLR  | a                        |
| IP100008918       | Splice Isoform 1 Of Epithelial protein lost | RSSSLK             | a                        |
| IP100008918       | Splice Isoform 1 Of Epithelial protein lost | SPPALVQGR          | a                        |
| IP100216719       | Splice Isoform 1 Of ERC protein 1           | MYGARSVGVKVEPSSQS  | a                        |
| IP100216719       | Splice Isoform 1 Of ERC protein 1           | QMSLLK             | a                        |
| IP100216719       | Splice Isoform 1 Of ERC protein 1           | SPRLGHR            | a                        |
| IP100216719       | Splice Isoform 1 Of ERC protein 1           | TNAEKQVEELLMAMEKV  | a                        |
| IP100291800       | Splice Isoform 1 Of Eukaryotic translation  | MYESK              | a                        |
| IP100291800       | Splice Isoform 1 Of Eukaryotic translation  | RSGPSLEK           | a                        |
| IP100291800       | Splice Isoform 1 Of Eukaryotic translation  | SSCSTPLSQANR       | a                        |
| IP100291800       | Splice Isoform 1 Of Eukaryotic translation  | YSDSGVVDPEK        | a                        |
| IP100219503       | Splice Isoform 1 Of F-box only protein 24   | AVPLLR             | a                        |
| IP100219503       | Splice Isoform 1 Of F-box only protein 24   | YLYVLATR           | a                        |
| IP100219503       | Splice Isoform 1 Of F-box only protein 24   | YVYLCRGAK          | a                        |
| IP100456676       | Splice Isoform 1 Of F-box only protein 38   | ADMKAARDIPEK       | a                        |
| IP100456676       | Splice Isoform 1 Of F-box only protein 38   | DCPKMMFHATR        | a                        |
| IP100456676       | Splice Isoform 1 Of F-box only protein 38   | DFLCSLRTFVMR       | a                        |
| IP100456676       | Splice Isoform 1 Of F-box only protein 38   | YNHQMGQSK          | a                        |
| IP100021885       | Splice Isoform 1 Of Fibrinogen              | AQLVDMKRLEVDIDIK   | a                        |
| IP100021885       | Splice Isoform 1 Of Fibrinogen              | GPRVVER            | a                        |
| IP100021885       | Splice Isoform 1 Of Fibrinogen              | QFTSSTSYNR         | a                        |
| IP100424119       | Splice Isoform 1 Of Frizzled 3 precursor    | DCSPPCPNMYER       | a                        |
| IP100424119       | Splice Isoform 1 Of Frizzled 3 precursor    | QVLQEPDFASQLLR     | a                        |
| IP100424119       | Splice Isoform 1 Of Frizzled 3 precursor    | REELSFAR           | a                        |
| IP100152849       | Splice Isoform 1 Of G2/mitotic-specific     | LLALK              | a                        |
| IP100001364       | Splice Isoform 1 Of GC-rich sequence        | NARENK             | a                        |
| IP100001364       | Splice Isoform 1 Of GC-rich sequence        | RIAREAR            | a                        |
| IP100306871       | Splice Isoform 1 Of General control of      | CASALEK            | a                        |
| IP100306871       | Splice Isoform 1 Of General control of      | EGVRQIPVESVPGIR    | a                        |
| IP100306871       | Splice Isoform 1 Of General control of      | FHLAPR             | a                        |
| IP100306871       | Splice Isoform 1 Of General control of      | NPKPPTAPR          | a                        |
| IP100305267       | Splice Isoform 1 Of Golgi autoantigen.      | AQGGSSDSSLALHER    | a                        |
| IP100305267       | Splice Isoform 1 Of Golgi autoantigen.      | QOERSSQPATKTR      | a                        |
| IP100305267       | Splice Isoform 1 Of Golgi autoantigen.      | TILEK              | a                        |
| IP100305267       | Splice Isoform 1 Of Golgi autoantigen.      | VMVEAYRRDATSK      | a                        |
| IP100026512       | Splice Isoform 1 Of GTP-binding protein     | VDCLKQK            | a                        |
| IP100074876       | Splice Isoform 1 Of Hepatocellular          | ALPEEAPARK         | a                        |
| IP100074876       | Splice Isoform 1 Of Hepatocellular          | ENISENDREYSGDAQVD  | a                        |
| IP100074876       | Splice Isoform 1 Of Hepatocellular          | MTKHPPNRR          | a                        |
| IP100018140       | Splice Isoform 1 Of Heterogeneous           | DSLDSHVQNK         | a                        |
| IP100018140       | Splice Isoform 1 Of Heterogeneous           | GRGVRGAR           | a                        |
| IP100018140       | Splice Isoform 1 Of Heterogeneous           | LMMDPLTGLNR        | a                        |
| IP100018140       | Splice Isoform 1 Of Heterogeneous           | LMSGK              | a                        |
| IP100018140       | Splice Isoform 1 Of Heterogeneous           | SFCFLEYEDHKTAQAQR  | a                        |
| IP100018246       | Splice Isoform 1 Of Hexokinase, type 1      | EMKNGLSR           | a                        |
| IP100018246       | Splice Isoform 1 Of Hexokinase, type 1      | LVNYSLSNAGKQR      | a                        |
| IP100018246       | Splice Isoform 1 Of Hexokinase, type 1      | TVCGVVSR           | a                        |
| IP100170643       | Splice Isoform 1 Of Histone-lysine          | LREEQEAARR         | a                        |
| IP100170643       | Splice Isoform 1 Of Histone-lysine          | SSTPQHPDLLAQPR     | a                        |
| IP100472711       | Splice Isoform 1 Of HLA class I             | DYIALNEHLR         | a                        |
| IP100059369       | Splice Isoform 1 Of Hypothetical protein    | DGEIQR             | a                        |
| IP100059369       | Splice Isoform 1 Of Hypothetical protein    | ENSEMR             | a                        |
| IP100059369       | Splice Isoform 1 Of Hypothetical protein    | EYQALQR            | a                        |
| IP100059369       | Splice Isoform 1 Of Hypothetical protein    | IRDLKDTDIQK        | a                        |
| IP100059369       | Splice Isoform 1 Of Hypothetical protein    | LHEEKMKELQAVR      | a                        |
| IP100031545       | Splice Isoform 1 Of Inositol                | ADLDQLR            | a                        |
| IP100031545       | Splice Isoform 1 Of Inositol                | LMEK               | a                        |
| IP100031545       | Splice Isoform 1 Of Inositol                | SHSNMIVQRAAMGWR    | a                        |

| IPI Accession No. | Protein Description                       | Peptide Sequence*  | Primary Source Dataset** |
|-------------------|-------------------------------------------|--------------------|--------------------------|
| IP100329577       | Splice Isoform 1 Of Jumonji/ARID          | ARSSGIMSQVGR       | a                        |
| IP100329577       | Splice Isoform 1 Of Jumonji/ARID          | IVIEEGGYEAICKDR    | a                        |
| IP100329577       | Splice Isoform 1 Of Jumonji/ARID          | RARSSGIMSQVGR      | a                        |
| IP100328753       | Splice Isoform 1 Of Kinectin              | DFQNMNFKL          | a                        |
| IP100328753       | Splice Isoform 1 Of Kinectin              | DKLLAAVYK          | a                        |
| IP100328753       | Splice Isoform 1 Of Kinectin              | DLLELQKK           | a                        |
| IP100328753       | Splice Isoform 1 Of Kinectin              | KNNDLR             | a                        |
| IP100328753       | Splice Isoform 1 Of Kinectin              | SVEELLEAEELK       | a                        |
| IP100290435       | Splice Isoform 1 Of Kinesin-like protein  | AMEELK             | a                        |
| IP100290435       | Splice Isoform 1 Of Kinesin-like protein  | AQNSEMR            | a                        |
| IP100290435       | Splice Isoform 1 Of Kinesin-like protein  | GADTSSADRQTR       | a                        |
| IP100295487       | Splice Isoform 1 Of Kinesin-like protein  | LENKLDIMR          | a                        |
| IP100295487       | Splice Isoform 1 Of Kinesin-like protein  | LRQLSQAEAMK        | a                        |
| IP100290435       | Splice Isoform 1 Of Kinesin-like protein  | MEGAENK            | a                        |
| IP100295487       | Splice Isoform 1 Of Kinesin-like protein  | SFSMMGHAEQLGLIPR   | a                        |
| IP100306325       | Splice Isoform 1 Of Leukocyte common      | DCLNLDKNIK         | a                        |
| IP100306325       | Splice Isoform 1 Of Leukocyte common      | MIWEQK             | a                        |
| IP100306325       | Splice Isoform 1 Of Leukocyte common      | YIAAQGPR           | a                        |
| IP100382523       | Splice Isoform 1 Of Limbin                | LPAQLTFQSSSR       | a                        |
| IP100382523       | Splice Isoform 1 Of Limbin                | WEHLIFMK           | a                        |
| IP100163496       | Splice Isoform 1 Of Liprin-alpha 1        | AETLPEVEAELAQR     | a                        |
| IP100163496       | Splice Isoform 1 Of Liprin-alpha 1        | ERMAALEDK          | a                        |
| IP100163496       | Splice Isoform 1 Of Liprin-alpha 1        | LAIQIMSLTSPSAPPTSR | a                        |
| IP100163496       | Splice Isoform 1 Of Liprin-alpha 1        | LGVMILLPPSR        | a                        |
| IP100163496       | Splice Isoform 1 Of Liprin-alpha 1        | VYTLNEQDWER        | a                        |
| IP100017094       | Splice Isoform 1 Of Lysosomal trafficking | CISVAPSR           | a                        |
| IP100017094       | Splice Isoform 1 Of Lysosomal trafficking | DASVPPIDGIDIEQK    | a                        |
| IP100017094       | Splice Isoform 1 Of Lysosomal trafficking | EGDTSVNEVDLNR      | a                        |
| IP100017094       | Splice Isoform 1 Of Lysosomal trafficking | EQTPPDAMALENSR     | a                        |
| IP100017094       | Splice Isoform 1 Of Lysosomal trafficking | LGGRVCHK           | a                        |
| IP100017094       | Splice Isoform 1 Of Lysosomal trafficking | MKKEEQK            | a                        |
| IP100017094       | Splice Isoform 1 Of Lysosomal trafficking | SVANDELHVMMQR      | a                        |
| IP100015881       | Splice Isoform 1 Of Macrophage colony     | DYEEHDKACVR        | a                        |
| IP100015881       | Splice Isoform 1 Of Macrophage colony     | FNSVPLTDGHER       | a                        |
| IP100064797       | Splice Isoform 1 Of MAP/microtubule       | LTSSRPPEALMAALR    | a                        |
| IP100030786       | Splice Isoform 1 Of Matrilin-4 precursor  | ELIEAQELAR         | a                        |
| IP100030786       | Splice Isoform 1 Of Matrilin-4 precursor  | GLNVGNATR          | a                        |
| IP100030786       | Splice Isoform 1 Of Matrilin-4 precursor  | GTMTGLALR          | a                        |
| IP100030786       | Splice Isoform 1 Of Matrilin-4 precursor  | LAADNK             | a                        |
| IP100030786       | Splice Isoform 1 Of Matrilin-4 precursor  | LFLPDGMEAR         | a                        |
| IP100030786       | Splice Isoform 1 Of Matrilin-4 precursor  | QSELTSDLSILQMSRK   | a                        |
| IP100030786       | Splice Isoform 1 Of Matrilin-4 precursor  | YQEELRELANK        | a                        |
| IP100030786       | Splice Isoform 1 Of Matrilin-4 precursor  | VPRVAVIVTDGPPQDR   | a                        |
| IP100008533       | Splice Isoform 1 Of Matrix                | AEDLSLGVWLSR       | a                        |
| IP100008533       | Splice Isoform 1 Of Matrix                | DSPLGHDITRALMYIAL  | a                        |
| IP100414431       | Splice Isoform 1 Of Merlin                | EATMANEALMR        | a                        |
| IP100414431       | Splice Isoform 1 Of Merlin                | MAEESER            | a                        |
| IP100414431       | Splice Isoform 1 Of Merlin                | MAGAIASRMFSLSLKR   | a                        |
| IP100414431       | Splice Isoform 1 Of Merlin                | QDLQEAAREAKR       | a                        |
| IP100428401       | Splice Isoform 1 Of Methyl-CpG binding    | EGGLPAIQVPGWQRR    | a                        |
| IP100428401       | Splice Isoform 1 Of Methyl-CpG binding    | NSRGARLPK          | a                        |
| IP100428401       | Splice Isoform 1 Of Methyl-CpG binding    | SISSEDDL           | a                        |
| IP100428401       | Splice Isoform 1 Of Methyl-CpG binding    | TAEDVKADEDVTK      | a                        |
| IP100296700       | Splice Isoform 1 Of Midline 2 protein     | AINQAGSRNSEPTR     | a                        |
| IP100296700       | Splice Isoform 1 Of Midline 2 protein     | KCKEAVSCSR         | a                        |
| IP100296700       | Splice Isoform 1 Of Midline 2 protein     | YIFIVK             | a                        |
| IP100166680       | Splice Isoform 1 Of Mitogen-activated     | FPFIRDQPTERQVR     | a                        |
| IP100166680       | Splice Isoform 1 Of Mitogen-activated     | LEDMQALR           | a                        |
| IP100166680       | Splice Isoform 1 Of Mitogen-activated     | RLEDMQALRR         | a                        |
| IP100166680       | Splice Isoform 1 Of Mitogen-activated     | TLDEAPRPK          | a                        |
| IP100166680       | Splice Isoform 1 Of Mitogen-activated     | VGASSKLDSSPVLSPGN  | a                        |
| IP100218823       | Splice Isoform 1 Of Myeloid/lymphoid or   | AGVLGAAGDR         | a                        |
| IP100218823       | Splice Isoform 1 Of Myeloid/lymphoid or   | ATSLELPAMRFR       | a                        |
| IP100218823       | Splice Isoform 1 Of Myeloid/lymphoid or   | ATSLELPAMRFRHLK    | a                        |
| IP100218823       | Splice Isoform 1 Of Myeloid/lymphoid or   | EGPGPGPTPRRGQS     | a                        |
| IP100218823       | Splice Isoform 1 Of Myeloid/lymphoid or   | LLGHHDVAIFLAEQLPGA | a                        |
| IP100218823       | Splice Isoform 1 Of Myeloid/lymphoid or   | MVQALTELLRRAQAPQA  | a                        |
| IP100218823       | Splice Isoform 1 Of Myeloid/lymphoid or   | SVHSMEDMIVGILMR    | a                        |
| IP100218823       | Splice Isoform 1 Of Myeloid/lymphoid or   | VPNYSR             | a                        |
| IP100021048       | Splice Isoform 1 Of Myoferlin             | DYSLDEFEANK        | a                        |
| IP100021048       | Splice Isoform 1 Of Myoferlin             | LDNAVRCGPK         | a                        |
| IP100021048       | Splice Isoform 1 Of Myoferlin             | YCTNIEK            | a                        |
| IP100021048       | Splice Isoform 1 Of Myoferlin             | VIDHRQFGR          | a                        |
| IP100021048       | Splice Isoform 1 Of Myoferlin             | VRVIEGRQLSGNNIRPVV | a                        |
| IP100021048       | Splice Isoform 1 Of Myoferlin             | WLLNDPEDTSSGSKGY   | a                        |
| IP100069126       | Splice Isoform 1 Of Myosin VI             | ASFHELNYMKK        | a                        |
| IP100069126       | Splice Isoform 1 Of Myosin VI             | DDEGFIR            | a                        |
| IP100069126       | Splice Isoform 1 Of Myosin VI             | DRELALR            | a                        |
| IP100069126       | Splice Isoform 1 Of Myosin VI             | EIEMNR             | a                        |
| IP100069126       | Splice Isoform 1 Of Myosin VI             | LFCK               | a                        |
| IP100069126       | Splice Isoform 1 Of Myosin VI             | NYHIFYRLCAGASEDIR  | a                        |
| IP100069126       | Splice Isoform 1 Of Myosin VI             | SPEYLK             | a                        |
| IP100017030       | Splice Isoform 1 Of Myosin XVIII          | RTTMLDRGPEGQACR    | a                        |
| IP100017030       | Splice Isoform 1 Of Myosin XVIII          | SWLRSGEPR          | a                        |
| IP100016480       | Splice Isoform 1 Of NACTH-, LRR- and      | MLIPFSNPR          | a                        |
| IP100016480       | Splice Isoform 1 Of NACTH-, LRR- and      | RAYFLR             | a                        |
| IP100016480       | Splice Isoform 1 Of NACTH-, LRR- and      | SSLCLDLGLNHIGVRGM  | a                        |
| IP100007921       | Splice Isoform 1 Of Neurexin 2-alpha      | AYGLMMATTSRESADTL  | a                        |
| IP100007921       | Splice Isoform 1 Of Neurexin 2-alpha      | DLRGLAEAQAVGVAPF   | a                        |
| IP100007921       | Splice Isoform 1 Of Neurexin 2-alpha      | LNDNEWHTVR         | a                        |
| IP100328195       | Splice Isoform 1 Of Neurobeachin protein  | ALEGPENCLFPR       | a                        |
| IP100328195       | Splice Isoform 1 Of Neurobeachin protein  | IQTTTTTQAVQGR      | a                        |
| IP100328195       | Splice Isoform 1 Of Neurobeachin protein  | LFSSNRENRR         | a                        |
| IP100328195       | Splice Isoform 1 Of Neurobeachin protein  | VAPLLR             | a                        |
| IP100436632       | Splice Isoform 1 Of Nipped-B-like protein | AMGIMDK            | a                        |
| IP100436632       | Splice Isoform 1 Of Nipped-B-like protein | AMSKQK             | a                        |
| IP100436632       | Splice Isoform 1 Of Nipped-B-like protein | ITEMCVKMRR         | a                        |

| IPI Accession No. | Protein Description                       | Peptide Sequence*   | Primary Source Dataset** |
|-------------------|-------------------------------------------|---------------------|--------------------------|
| IP000436632       | Splice Isoform 1 Of Nipped-B-like protein | RDSGRPSTEK          | a                        |
| IP000436632       | Splice Isoform 1 Of Nipped-B-like protein | SDSK                | a                        |
| IP000436632       | Splice Isoform 1 Of Nipped-B-like protein | SETTKSRPETPK        | a                        |
| IP00001735        | Splice Isoform 1 Of Nuclear receptor      | ADMLRGLSPR          | a                        |
| IP00001735        | Splice Isoform 1 Of Nuclear receptor      | AISSASIEGLMGRAIPPER | a                        |
| IP00001735        | Splice Isoform 1 Of Nuclear receptor      | DTGQNGPKPPATLGADG   | a                        |
| IP00001735        | Splice Isoform 1 Of Nuclear receptor      | GYPTAALENR          | a                        |
| IP00001735        | Splice Isoform 1 Of Nuclear receptor      | HDVRSLIGSPGR        | a                        |
| IP00001735        | Splice Isoform 1 Of Nuclear receptor      | LNTHNR              | a                        |
| IP00001735        | Splice Isoform 1 Of Nuclear receptor      | VERIENNPRR          | a                        |
| IP000152181       | Splice Isoform 1 Of Numb-binding protein  | DIVLRR              | a                        |
| IP000152181       | Splice Isoform 1 Of Numb-binding protein  | KINRALSCLR          | a                        |
| IP00026580        | Splice Isoform 1 Of Oral-facial-digital   | LSSTPLPKAK          | a                        |
| IP00026580        | Splice Isoform 1 Of Oral-facial-digital   | RSLESEMYLEGLGR      | a                        |
| IP00034983        | Splice Isoform 1 Of Orphan nuclear        | EMIMSDEAVEER        | a                        |
| IP00034983        | Splice Isoform 1 Of Orphan nuclear        | GACEITR             | a                        |
| IP00023555        | Splice Isoform 1 Of Oxyster binding       | DLGFSK              | a                        |
| IP00023555        | Splice Isoform 1 Of Oxyster binding       | MMSDEK              | a                        |
| IP00023555        | Splice Isoform 1 Of Oxyster binding       | VTSCHNLSGQR         | a                        |
| IP00029200        | Splice Isoform 1 Of p53-associated        | CWEKVEVSSNPHR       | a                        |
| IP00029200        | Splice Isoform 1 Of p53-associated        | NLDELGEK            | a                        |
| IP00012894        | Splice Isoform 1 Of Paired box protein    | IIVEMAHGIRPCVISR    | a                        |
| IP00012894        | Splice Isoform 1 Of Paired box protein    | RENPMGFSEWR         | a                        |
| IP00012894        | Splice Isoform 1 Of Paired box protein    | STVPSGLVSSISRVLR    | a                        |
| IP00012894        | Splice Isoform 1 Of Paired box protein    | ASSASVPAVGASAEGR    | a                        |
| IP000171176       | Splice Isoform 1 Of Pantothenate kinase   | DLTLCGRK            | a                        |
| IP000171176       | Splice Isoform 1 Of Pantothenate kinase   | ARVGAEEAK           | a                        |
| IP00024853        | Splice Isoform 1 Of Periaxin              | GEAPEVALKMPRLSPPR   | a                        |
| IP00024853        | Splice Isoform 1 Of Periaxin              | GKEAEVQDRASPGEK     | a                        |
| IP00024853        | Splice Isoform 1 Of Periaxin              | GQEGDAAPK           | a                        |
| IP00024853        | Splice Isoform 1 Of Periaxin              | MPKMTMPK            | a                        |
| IP00024853        | Splice Isoform 1 Of Periaxin              | MPSFLAR             | a                        |
| IP000249304       | Splice Isoform 1 Of Peroxisomal           | DLGQVSVGSFEILPGR    | a                        |
| IP000295252       | Splice Isoform 1 Of Phosphatidylinositol  | RTPGK               | a                        |
| IP000295252       | Splice Isoform 1 Of Phosphatidylinositol  | SVQRGLAEVAGLQVGR    | a                        |
| IP000295252       | Splice Isoform 1 Of Phosphatidylinositol  | TTPSVGR             | a                        |
| IP000295252       | Splice Isoform 1 Of Phosphatidylinositol  | VNLK                | a; c; d                  |
| IP00024727        | Splice Isoform 1 Of Phospholipase D2      | CLPSNATRSR          | a                        |
| IP00024727        | Splice Isoform 1 Of Phospholipase D2      | DFLQLHR             | a                        |
| IP00024727        | Splice Isoform 1 Of Phospholipase D2      | EGEDPADR            | a                        |
| IP00024727        | Splice Isoform 1 Of Phospholipase D2      | EMPSLRAGPEGSTR      | a                        |
| IP00024727        | Splice Isoform 1 Of Phospholipase D2      | GLEGMRK             | a                        |
| IP00024727        | Splice Isoform 1 Of Phospholipase D2      | YTSKSVGTCTLYSVR     | a                        |
| IP000411656       | Splice Isoform 1 Of Piccolo protein       | ELLELEK             | a                        |
| IP000411656       | Splice Isoform 1 Of Piccolo protein       | ETLSMEK             | a                        |
| IP000411656       | Splice Isoform 1 Of Piccolo protein       | IISHPSPSESK         | a                        |
| IP000411656       | Splice Isoform 1 Of Piccolo protein       | LENGHLDRLKPER       | a                        |
| IP000411656       | Splice Isoform 1 Of Piccolo protein       | QIAAVMSR            | a                        |
| IP000411656       | Splice Isoform 1 Of Piccolo protein       | RDSSSSSLRLK         | a                        |
| IP000411656       | Splice Isoform 1 Of Piccolo protein       | TVVTMDESTSSVMTK     | a                        |
| IP000021833       | Splice Isoform 1 Of Platelet-derived      | ESGKK               | a                        |
| IP000297116       | Splice Isoform 1 Of Pleckstrin homology   | ISESPEVTR           | a                        |
| IP000297116       | Splice Isoform 1 Of Pleckstrin homology   | LLTLGRTLSPAR        | a                        |
| IP00014898        | Splice Isoform 1 Of Plectin 1             | ARIEENRALILR        | a                        |
| IP00014898        | Splice Isoform 1 Of Plectin 1             | AVTGRDPYTEK         | a                        |
| IP00014898        | Splice Isoform 1 Of Plectin 1             | DRRPRSLHPHVPGVTNL   | a                        |
| IP00014898        | Splice Isoform 1 Of Plectin 1             | EKLQAEK             | a                        |
| IP00014898        | Splice Isoform 1 Of Plectin 1             | ELAQEQARR           | a                        |
| IP00014898        | Splice Isoform 1 Of Plectin 1             | ELQNAQDRLLR         | a                        |
| IP00014898        | Splice Isoform 1 Of Plectin 1             | GDECQLVGAQPSHWK     | a                        |
| IP00014898        | Splice Isoform 1 Of Plectin 1             | GERSVR              | a                        |
| IP00014898        | Splice Isoform 1 Of Plectin 1             | HYLQGRSSIAGLLK      | a                        |
| IP00014898        | Splice Isoform 1 Of Plectin 1             | LAEQQAEEER          | a                        |
| IP00014898        | Splice Isoform 1 Of Plectin 1             | LQAEVLQKQK          | a                        |
| IP00014898        | Splice Isoform 1 Of Plectin 1             | MGIVGPEFK           | a                        |
| IP00014898        | Splice Isoform 1 Of Plectin 1             | SKEQAELEAARQR       | a                        |
| IP00014898        | Splice Isoform 1 Of Plectin 1             | VAEMSR              | a                        |
| IP00014898        | Splice Isoform 1 Of Plectin 1             | VQAEREAAQSR         | a                        |
| IP00014898        | Splice Isoform 1 Of Plectin 1             | VSITEAMHR           | a                        |
| IP00029274        | Splice Isoform 1 Of Polycystic kidney and | DGRIVNVTVIRGDYSAVL  | a                        |
| IP00029274        | Splice Isoform 1 Of Polycystic kidney and | GKSMVHK             | a                        |
| IP00029274        | Splice Isoform 1 Of Polycystic kidney and | MIVSFTIGFQSMVK      | a                        |
| IP00029274        | Splice Isoform 1 Of Polycystic kidney and | RVQRRPLMMEMNSHR     | a                        |
| IP00029274        | Splice Isoform 1 Of Polycystic kidney and | VQIVLR              | a                        |
| IP00029274        | Splice Isoform 1 Of Polycystic kidney and | VSDENLTGVNPAATR     | a                        |
| IP000171491       | Splice Isoform 1 Of Potassium             | ELRNQSGTQDPER       | a                        |
| IP000171491       | Splice Isoform 1 Of Potassium             | MTALEK              | a                        |
| IP000171491       | Splice Isoform 1 Of Potassium             | OPIEDDSTK           | a                        |
| IP000171491       | Splice Isoform 1 Of Potassium             | SDRLDRKAGEAR        | a                        |
| IP000098591       | Splice Isoform 1 Of Potassium             | TMAGGRR             | a                        |
| IP000098591       | Splice Isoform 1 Of Potassium             | VSKAESMETLPERTK     | a                        |
| IP00001723        | Splice Isoform 1 Of Probable G            | LTPEER              | a                        |
| IP000452590       | Splice Isoform 1 Of Probable G            | ISELK               | a                        |
| IP000452590       | Splice Isoform 1 Of Probable G            | MDVIFVAEMIEK        | a                        |
| IP000452590       | Splice Isoform 1 Of Probable G            | NSSQGCK             | a                        |
| IP000142538       | Splice Isoform 1 Of Probable helicase     | ISPASYNKEESEQMGKTS  | a                        |
| IP000142538       | Splice Isoform 1 Of Probable helicase     | LLTENQR             | a                        |
| IP000142538       | Splice Isoform 1 Of Probable helicase     | NSCNVLHPQSPNNSNR    | a                        |
| IP000142538       | Splice Isoform 1 Of Probable helicase     | QLIKCMPSEPETIK      | a                        |
| IP000142538       | Splice Isoform 1 Of Probable helicase     | QLYPKENDLVFLAPER    | a                        |
| IP000427501       | Splice Isoform 1 Of Protein D11Lgp1       | CRIGDVVR            | a                        |
| IP000165981       | Splice Isoform 1 Of Protein KIAA1404      | AMGRNPHQGR          | a                        |
| IP000165981       | Splice Isoform 1 Of Protein KIAA1404      | NFNLEVSLFERLVK      | a                        |
| IP000165981       | Splice Isoform 1 Of Protein KIAA1404      | VKDELK              | a                        |
| IP000394968       | Splice Isoform 1 Of Protein KIAA1985      | DREMEGR             | a                        |
| IP000394968       | Splice Isoform 1 Of Protein KIAA1985      | GVIYNLLGALQGEGR     | a                        |
| IP000394968       | Splice Isoform 1 Of Protein KIAA1985      | HEEVLPPAER          | a                        |

| IPI Accession No. | Protein Description                        | Peptide Sequence*   | Primary Source Dataset** |
|-------------------|--------------------------------------------|---------------------|--------------------------|
| IP100394968       | Splice Isoform 1 Of Protein KIAA1985       | TMEEIWK             | a                        |
| IP100329075       | Splice Isoform 1 Of Protein phosphatase    | DESPSSWRLGLRK       | a                        |
| IP100020950       | Splice Isoform 1 Of Protein phosphatase    | GSAGAPSVENVK        | a                        |
| IP100020950       | Splice Isoform 1 Of Protein phosphatase    | QGEVVDLHVHMR        | a                        |
| IP100020950       | Splice Isoform 1 Of Protein phosphatase    | SGATALHVAAA         | a                        |
| IP100020950       | Splice Isoform 1 Of Protein phosphatase    | SRLEVTDDLEK         | a                        |
| IP100291549       | Splice Isoform 1 Of RAP                    | NRYTVMSTPEK         | a                        |
| IP100291549       | Splice Isoform 1 Of RAP                    | RQQLR               | a                        |
| IP100291549       | Splice Isoform 1 Of RAP                    | VVLVLER             | a                        |
| IP100291549       | Splice Isoform 1 Of RAP                    | YTVMSGTPEK          | a                        |
| IP100014454       | Splice Isoform 1 Of Ras and Rab            | LEHVLEK             | a                        |
| IP100291099       | Splice Isoform 1 Of Receptor-type          | DIEEGAIVNPGR        | a; d                     |
| IP100291099       | Splice Isoform 1 Of Receptor-type          | EEEEGKDIEEGAIVNPGR  | a                        |
| IP100291099       | Splice Isoform 1 Of Receptor-type          | IGLAEGLESEK         | a                        |
| IP100387015       | Splice Isoform 1 Of Regulating synaptic    | AKREK               | a                        |
| IP100387015       | Splice Isoform 1 Of Regulating synaptic    | IQIQHASPENDR        | a                        |
| IP100387015       | Splice Isoform 1 Of Regulating synaptic    | QMKMKVHR            | a                        |
| IP100387015       | Splice Isoform 1 Of Regulating synaptic    | QTLATPAMGDIQGMEDK   | a                        |
| IP100027385       | Splice Isoform 1 Of Regulator of G-protein | CPAVSHGR            | a                        |
| IP100027385       | Splice Isoform 1 Of Regulator of G-protein | YGDQSKVK            | a                        |
| IP100027172       | Splice Isoform 1 Of Restin                 | ENESLKSKEHANK       | a                        |
| IP100003971       | Splice Isoform 1 Of Reticulon 1            | IQAKIPGAK           | a                        |
| IP100021766       | Splice Isoform 1 Of Reticulon 4            | TDSFSKLAREYTDLEVSH  | a                        |
| IP100398728       | Splice Isoform 1 Of Retinitis pigmentosa   | KVSPASPK            | a                        |
| IP100398728       | Splice Isoform 1 Of Retinitis pigmentosa   | QLYTTSGKK           | a                        |
| IP100398728       | Splice Isoform 1 Of Retinitis pigmentosa   | TFSALMDELSQLR       | a                        |
| IP100398728       | Splice Isoform 1 Of Retinitis pigmentosa   | VAPRGHPR            | a                        |
| IP100449923       | Splice Isoform 1 Of Retinoic acid induced  | ASDGSK              | a                        |
| IP100449923       | Splice Isoform 1 Of Retinoic acid induced  | KGRAGAHGLSK         | a                        |
| IP100449923       | Splice Isoform 1 Of Retinoic acid induced  | SSSSNASGNGDGGK      | a                        |
| IP100449923       | Splice Isoform 1 Of Retinoic acid induced  | TAVPPSR             | a                        |
| IP100099131       | Splice Isoform 1 Of Rotavirus 'X'          | CSLALPHIDESVTQLGQEL | a                        |
| IP100099131       | Splice Isoform 1 Of Rotavirus 'X'          | EAYECSSR            | a                        |
| IP100099131       | Splice Isoform 1 Of Rotavirus 'X'          | EQVEIGAPRDCYVDR     | a                        |
| IP100329784       | Splice Isoform 1 Of Ryanodine receptor 3   | EKMRLPVK            | a                        |
| IP100329784       | Splice Isoform 1 Of Ryanodine receptor 3   | IAVYAQPIISK         | a                        |
| IP100329784       | Splice Isoform 1 Of Ryanodine receptor 3   | ITATLEK             | a                        |
| IP100329784       | Splice Isoform 1 Of Ryanodine receptor 3   | QPDPLHQIILYFSR      | a                        |
| IP100329784       | Splice Isoform 1 Of Ryanodine receptor 3   | RHGLPGVGLR          | a                        |
| IP100329784       | Splice Isoform 1 Of Ryanodine receptor 3   | SQIAFPK             | a                        |
| IP100329784       | Splice Isoform 1 Of Ryanodine receptor 3   | VEPLRISWGSNIR       | a                        |
| IP100001663       | Splice Isoform 1 Of Serine protease        | ALLTSGTSDPR         | a                        |
| IP100001663       | Splice Isoform 1 Of Serine protease        | EPSPFDVQHGVLIHK     | a                        |
| IP100402419       | Splice Isoform 1 Of Serine/threonine       | DLDEVIRGVLR         | a                        |
| IP100402419       | Splice Isoform 1 Of Serine/threonine       | LLHEDK              | a                        |
| IP100402419       | Splice Isoform 1 Of Serine/threonine       | LLHEDKR             | a                        |
| IP100402419       | Splice Isoform 1 Of Serine/threonine       | NIDTAVLEK           | a                        |
| IP100301618       | Splice Isoform 1 Of Serologically defined  | LTEIVASAPK          | a                        |
| IP100301618       | Splice Isoform 1 Of Serologically defined  | VDESCVWRHQGER       | a                        |
| IP100301618       | Splice Isoform 1 Of Serologically defined  | VYWFEEK             | a                        |
| IP100029446       | Splice Isoform 1 Of SET binding factor 1   | KNGLMEASPEQR        | a                        |
| IP100029446       | Splice Isoform 1 Of SET binding factor 1   | MQGAPPAVKAERR       | a                        |
| IP100029446       | Splice Isoform 1 Of SET binding factor 1   | NTLSGFSSAHMGSHGK    | a                        |
| IP100011961       | Splice Isoform 1 Of Sialoadhesin           | APNLLR              | a                        |
| IP100011961       | Splice Isoform 1 Of Sialoadhesin           | DEGFYCSAR           | a                        |
| IP100011961       | Splice Isoform 1 Of Sialoadhesin           | LLISPAAEVVEGQAVTLS  | a                        |
| IP100011961       | Splice Isoform 1 Of Sialoadhesin           | SGLSPTDAR           | a                        |
| IP100217054       | Splice Isoform 1 Of Smad ubiquitination    | EMSNPGR             | a                        |
| IP100217054       | Splice Isoform 1 Of Smad ubiquitination    | LDHPPAAR            | a                        |
| IP100217054       | Splice Isoform 1 Of Smad ubiquitination    | LQAQRINPDVR         | a                        |
| IP100217054       | Splice Isoform 1 Of Smad ubiquitination    | SLCPGSDPGAQPGAVTL   | a                        |
| IP100018829       | Splice Isoform 1 Of Spectrin beta chain,   | DVSSVEVLNMYHQGLK    | a                        |
| IP100005614       | Splice Isoform 1 Of Spectrin beta chain,   | HTLVEADIGIAER       | a                        |
| IP100005614       | Splice Isoform 1 Of Spectrin beta chain,   | KEMIDK              | a                        |
| IP100005614       | Splice Isoform 1 Of Spectrin beta chain,   | LEEHR               | a                        |
| IP100005614       | Splice Isoform 1 Of Spectrin beta chain,   | LEMNLGLQK           | a                        |
| IP100005614       | Splice Isoform 1 Of Spectrin beta chain,   | LYAGLKDLAERR        | a                        |
| IP100005614       | Splice Isoform 1 Of Spectrin beta chain,   | MHTTFEHDIGALGTQVR   | a                        |
| IP100005614       | Splice Isoform 1 Of Spectrin beta chain,   | RKEMIDK             | a                        |
| IP100018829       | Splice Isoform 1 Of Spectrin beta chain,   | RTRLEQNALQK         | a                        |
| IP100018829       | Splice Isoform 1 Of Spectrin beta chain,   | RWLRHQAFMAELAQNK    | a                        |
| IP100005614       | Splice Isoform 1 Of Spectrin beta chain,   | SLLDACESR           | a                        |
| IP100005614       | Splice Isoform 1 Of Spectrin beta chain,   | TQTAASEDMPTNLTAEK   | a                        |
| IP100010740       | Splice Isoform 1 Of Splicing factor,       | EESYSRMGYMDPR       | a                        |
| IP100010740       | Splice Isoform 1 Of Splicing factor,       | EMQLRQEEERR         | a                        |
| IP100010740       | Splice Isoform 1 Of Splicing factor,       | GGGEPGRGR           | a                        |
| IP100411559       | Splice Isoform 1 Of Structural             | ELMGFSKSVNEAR       | a                        |
| IP100411559       | Splice Isoform 1 Of Structural             | LGDLGAIDEK          | a                        |
| IP100411559       | Splice Isoform 1 Of Structural             | MESQLQNSK           | a                        |
| IP100411559       | Splice Isoform 1 Of Structural             | SNNINEITTRNNALEKEK  | a                        |
| IP100006615       | Splice Isoform 1 Of Suppressor of          | GFIRLDMSEFQER       | a                        |
| IP100006615       | Splice Isoform 1 Of Suppressor of          | RDEFLGR             | a                        |
| IP100220119       | Splice Isoform 1 Of SWI/SNF-related,       | ANTPDSITEK          | a                        |
| IP100220119       | Splice Isoform 1 Of SWI/SNF-related,       | NLFNDR              | a                        |
| IP100220119       | Splice Isoform 1 Of SWI/SNF-related,       | SADEQSIYEKER        | a                        |
| IP100220119       | Splice Isoform 1 Of SWI/SNF-related,       | SLFRRLK             | a                        |
| IP100220119       | Splice Isoform 1 Of SWI/SNF-related,       | VFAEDQDMQYASQSEVP   | a                        |
| IP100220119       | Splice Isoform 1 Of SWI/SNF-related,       | YQHLMTINANRR        | a                        |
| IP100413058       | Splice Isoform 1 Of Synaptodin             | HIMSRSPMVER         | a                        |
| IP100413058       | Splice Isoform 1 Of Synaptodin             | RHFGEK              | a                        |
| IP100015793       | Splice Isoform 1 Of Telomerase-binding     | FESRDSCLR           | a                        |
| IP100015793       | Splice Isoform 1 Of Telomerase-binding     | RNRYR               | a                        |
| IP100015793       | Splice Isoform 1 Of Telomerase-binding     | SIEFLEQR            | a                        |
| IP100025276       | Splice Isoform 1 Of Tenascin X precursor   | DRDGGQPVVPAADQR     | a                        |
| IP100025276       | Splice Isoform 1 Of Tenascin X precursor   | FLLYLGLGK           | a                        |
| IP100025276       | Splice Isoform 1 Of Tenascin X precursor   | GDASPGAPPR          | a                        |
| IP100025276       | Splice Isoform 1 Of Tenascin X precursor   | GESEVTVGLEPGRK      | a                        |



| IPI Accession No. | Protein Description                          | Peptide Sequence*  | Primary Source Dataset** |
|-------------------|----------------------------------------------|--------------------|--------------------------|
| IP100025276       | Splice Isoform 1 Of Tenascin X precursor     | GPDCAIQTCPGDCR     | a                        |
| IP100025276       | Splice Isoform 1 Of Tenascin X precursor     | TVARGDASPGAPPR     | a                        |
| IP100025276       | Splice Isoform 1 Of Tenascin X precursor     | YGGQESK            | a                        |
| IP100025276       | Splice Isoform 1 Of Tenascin X precursor     | VSYQLADGGEFPQSVQVD | a                        |
| IP100478890       | Splice Isoform 1 Of Testican-3 precursor     | SDGGNFLLDDK        | a                        |
| IP100397195       | Splice Isoform 1 Of Tetratricopeptide        | IKDSMPLLEK         | a                        |
| IP100152982       | Splice Isoform 1 Of Tetratricopeptide        | LCTAEPR            | a                        |
| IP100397195       | Splice Isoform 1 Of Tetratricopeptide        | LPNSLASRFR         | a                        |
| IP100152982       | Splice Isoform 1 Of Tetratricopeptide        | TDLLQVLLK          | a                        |
| IP100003843       | Splice Isoform 1 Of Tight junction protein   | EDAVLYLLEIPK       | a                        |
| IP100003843       | Splice Isoform 1 Of Tight junction protein   | KLFDQANK           | a                        |
| IP100003843       | Splice Isoform 1 Of Tight junction protein   | STGDIAGTVVPEYTK    | a                        |
| IP100169404       | Splice Isoform 1 Of Transcription factor     | ARRLDPSEAAETPCIK   | a                        |
| IP100169404       | Splice Isoform 1 Of Transcription factor     | NPEMCR             | a                        |
| IP100169404       | Splice Isoform 1 Of Transcription factor     | RGGAGTGPR          | a                        |
| IP100159322       | Splice Isoform 1 Of Transcription factor 20  | FEIEPQSSAHEPGGSLSE | a                        |
| IP100159322       | Splice Isoform 1 Of Transcription factor 20  | GNASPGAAATHDSLSDYK | a                        |
| IP100159322       | Splice Isoform 1 Of Transcription factor 20  | GRPGVSNK           | a                        |
| IP100159322       | Splice Isoform 1 Of Transcription factor 20  | LPGQEDHSSQNPILMR   | a                        |
| IP100159322       | Splice Isoform 1 Of Transcription factor 20  | SSSTAPEMK          | a                        |
| IP100159322       | Splice Isoform 1 Of Transcription factor 20  | YATQPLDK           | a                        |
| IP100016619       | Splice Isoform 1 Of Tripartite motif protein | AEPAGRQPR          | a                        |
| IP100016619       | Splice Isoform 1 Of Tripartite motif protein | CMKTDVKNLSEIK      | a                        |
| IP100152001       | Splice Isoform 1 Of Tripartite motif protein | DNPIEDLVFR         | a                        |
| IP100152001       | Splice Isoform 1 Of Tripartite motif protein | DVVEQKHAALQR       | a                        |
| IP100016619       | Splice Isoform 1 Of Tripartite motif protein | LKTQMAEVR          | a                        |
| IP100152001       | Splice Isoform 1 Of Tripartite motif protein | LMGPKGVAVDR        | a                        |
| IP100028976       | Splice Isoform 1 Of Tripartite motif protein | NTQTLQVVR          | a                        |
| IP100028976       | Splice Isoform 1 Of Tripartite motif protein | QLAIR              | a                        |
| IP100016619       | Splice Isoform 1 Of Tripartite motif protein | RRLMELISLVQEVER    | a                        |
| IP100016619       | Splice Isoform 1 Of Tripartite motif protein | VEMVHQSCNDPTK      | a                        |
| IP100030246       | Splice Isoform 1 Of Tyrosine-protein         | EIALETAMTQRK       | a                        |
| IP100030246       | Splice Isoform 1 Of Tyrosine-protein         | GKNEDNR            | a                        |
| IP100030246       | Splice Isoform 1 Of Tyrosine-protein         | NRYKNILPYDATR      | a                        |
| IP100030246       | Splice Isoform 1 Of Tyrosine-protein         | SAVSAPKSTK         | a                        |
| IP100030246       | Splice Isoform 1 Of Tyrosine-protein         | VLELPR             | a                        |
| IP100001985       | Splice Isoform 1 Of Vacuolar protein         | AKEAEGGAATAGPSR    | a                        |
| IP100001985       | Splice Isoform 1 Of Vacuolar protein         | ANEPNHVELGR        | a                        |
| IP100001985       | Splice Isoform 1 Of Vacuolar protein         | LGALQDPEALTYR      | a                        |
| IP100025477       | Splice Isoform 1 Of Voltage-dependent        | ARPEAAEAEPGVDPFR   | a                        |
| IP100025477       | Splice Isoform 1 Of Voltage-dependent        | ASCEALYSEMDPEERLR  | a                        |
| IP100472283       | Splice Isoform 1 Of Voltage-dependent        | HKERLLR            | a                        |
| IP100472283       | Splice Isoform 1 Of Voltage-dependent        | HNNFR              | a                        |
| IP100472283       | Splice Isoform 1 Of Voltage-dependent        | HRRVR              | a                        |
| IP100025477       | Splice Isoform 1 Of Voltage-dependent        | LAJETQPVTDASPMKR   | a                        |
| IP100472283       | Splice Isoform 1 Of Voltage-dependent        | SFFGSLMLLFR        | a                        |
| IP100472283       | Splice Isoform 1 Of Voltage-dependent        | ASSPSSASSSSFR      | a                        |
| IP100410013       | Splice Isoform 1 Of Zinc finger CCCH         | GACPRGAQCQLLHR     | a                        |
| IP100410013       | Splice Isoform 1 Of Zinc finger CCCH         | RGTSISLPGDK        | a                        |
| IP100410013       | Splice Isoform 1 Of Zinc finger CCCH         | VSASHGFRKPSASQRPT  | a                        |
| IP100220617       | Splice Isoform 2 Of                          | DTDFEHR            | a                        |
| IP100220617       | Splice Isoform 2 Of                          | RTLMDK             | a                        |
| IP100298955       | Splice Isoform 2 Of Active breakpoint        | AKTRVFR            | a                        |
| IP100298955       | Splice Isoform 2 Of Active breakpoint        | CSQSNQFOK          | a                        |
| IP100298955       | Splice Isoform 2 Of Active breakpoint        | DGFLVEVSESRK       | a                        |
| IP100298955       | Splice Isoform 2 Of Active breakpoint        | ANPNKDSK           | a                        |
| IP100215877       | Splice Isoform 2 Of Adenomatous              | CTSVSLSDSFESR      | a                        |
| IP100215877       | Splice Isoform 2 Of Adenomatous              | DTPIEGR            | a                        |
| IP100215877       | Splice Isoform 2 Of Adenomatous              | EKAELR             | a                        |
| IP100215877       | Splice Isoform 2 Of Adenomatous              | GAATDEK            | a                        |
| IP100215877       | Splice Isoform 2 Of Adenomatous              | HEDCPINPNSGR       | a                        |
| IP100215877       | Splice Isoform 2 Of Adenomatous              | MDHETASVLSSTSTHSA  | a                        |
| IP100215877       | Splice Isoform 2 Of Adenomatous              | QTSIQGGSSKAPSRGSG  | a                        |
| IP100184670       | Splice Isoform 2 Of AMP deaminase 2          | KVDTHIHSSCMNQK     | a                        |
| IP100184670       | Splice Isoform 2 Of AMP deaminase 2          | LEPDILLR           | a                        |
| IP100184670       | Splice Isoform 2 Of AMP deaminase 2          | NSGIMASEARGGLGAPP  | a                        |
| IP100184670       | Splice Isoform 2 Of AMP deaminase 2          | RAMK               | a                        |
| IP100217460       | Splice Isoform 2 Of Apoptotic protease       | ADLPEQAHSIIK       | a                        |
| IP100217460       | Splice Isoform 2 Of Apoptotic protease       | ILMLR              | a                        |
| IP100217460       | Splice Isoform 2 Of Apoptotic protease       | KLVNAIQK           | a                        |
| IP100217460       | Splice Isoform 2 Of Apoptotic protease       | YVVPVSSLGK         | a                        |
| IP100165946       | Splice Isoform 2 Of BAI1-associated          | HFLNQRFOK          | a                        |
| IP100165946       | Splice Isoform 2 Of BAI1-associated          | QGHVNLIVRRK        | a                        |
| IP100165946       | Splice Isoform 2 Of BAI1-associated          | YDVLGVDSCK         | a                        |
| IP100220873       | Splice Isoform 2 Of Bifunctional             | EGENPPDGFMAPK      | a                        |
| IP100220873       | Splice Isoform 2 Of Bifunctional             | GFMREK             | a                        |
| IP100220873       | Splice Isoform 2 Of Bifunctional             | LFADAGLVCTSFISPFVK | a                        |
| IP100220873       | Splice Isoform 2 Of Bifunctional             | RVAILR             | a                        |
| IP100061354       | Splice Isoform 2 Of Bromodomain              | KCNQEQSKNQPLDAR    | a                        |
| IP100061354       | Splice Isoform 2 Of Bromodomain              | RLELEMAK           | a                        |
| IP100478736       | Splice Isoform 2 Of Centrosomal protein      | MLGTSSK            | a                        |
| IP100478736       | Splice Isoform 2 Of Centrosomal protein      | VDIPR              | a                        |
| IP100455210       | Splice Isoform 2 Of Chromodomain             | DSRAIIR            | a                        |
| IP100455210       | Splice Isoform 2 Of Chromodomain             | FAEMEER            | a                        |
| IP100455210       | Splice Isoform 2 Of Chromodomain             | LGCFGSK            | a                        |
| IP100455210       | Splice Isoform 2 Of Chromodomain             | MMMLVGLAK          | a                        |
| IP100455210       | Splice Isoform 2 Of Chromodomain             | TEEPMIETPK         | a                        |
| IP100220613       | Splice Isoform 2 Of Collagen alpha 2(VI)     | GDPGDAGPR          | a                        |
| IP100220613       | Splice Isoform 2 Of Collagen alpha 2(VI)     | QGDPEGGPGFPGPK     | a                        |
| IP100220613       | Splice Isoform 2 Of Collagen alpha 2(VI)     | QGSRGDPGDAGPR      | a                        |
| IP100219317       | Splice Isoform 2 Of Crooked neck-like        | ANPHNYDAWFDYLR     | a                        |
| IP100219317       | Splice Isoform 2 Of Crooked neck-like        | EIQARSIYER         | a                        |
| IP100219317       | Splice Isoform 2 Of Crooked neck-like        | NRTVISNWK          | a                        |
| IP100219317       | Splice Isoform 2 Of Crooked neck-like        | RGIEDHYSK          | a                        |
| IP100219317       | Splice Isoform 2 Of Crooked neck-like        | VVWISFAQFELSSGK    | a                        |
| IP100219317       | Splice Isoform 2 Of Crooked neck-like        | VYIELEQLR          | a                        |
| IP100219317       | Splice Isoform 2 Of Crooked neck-like        | YAQWEESLKEIQR      | a                        |



| IPI Accession No. | Protein Description                         | Peptide Sequence*  | Primary Source Dataset** |
|-------------------|---------------------------------------------|--------------------|--------------------------|
| IP00409613        | Splice Isoform 2 Of Development and         | EIISEVQR           | a                        |
| IP00409613        | Splice Isoform 2 Of Development and         | TEISGAEIAEMEKEKRR  | a                        |
| IP00220581        | Splice Isoform 2 Of Disks                   | DGFSTLQFPR         | a                        |
| IP00220581        | Splice Isoform 2 Of Disks                   | GGMEDGK            | a                        |
| IP00221115        | Splice Isoform 2 Of Disks                   | HLPESSQSSVR        | a                        |
| IP00221115        | Splice Isoform 2 Of Disks                   | IPANLLDQFEK        | a                        |
| IP00220581        | Splice Isoform 2 Of Disks                   | LDSVDMLLPSK        | a                        |
| IP00220581        | Splice Isoform 2 Of Disks                   | LPANLLDQFEK        | a                        |
| IP00221115        | Splice Isoform 2 Of Disks                   | MHYSSHVDTR         | a                        |
| IP00221115        | Splice Isoform 2 Of Disks                   | SAILXEPLLK         | a                        |
| IP00220581        | Splice Isoform 2 Of Disks                   | SSGPASGLMILGRQAER  | a                        |
| IP00221115        | Splice Isoform 2 Of Disks                   | TSPKSAHLXPELLK     | a                        |
| IP00221115        | Splice Isoform 2 Of Disks                   | YSPAPR             | a                        |
| IP00220918        | Splice Isoform 2 Of DNA                     | DEDEKEEKR          | a                        |
| IP00220918        | Splice Isoform 2 Of DNA                     | TYFYQLWYDQDYAR     | a                        |
| IP00220918        | Splice Isoform 2 Of DNA                     | YTHHDKK            | a                        |
| IP00376215        | Splice Isoform 2 Of DNA-dependent           | DILETHLREK         | a                        |
| IP00376215        | Splice Isoform 2 Of DNA-dependent           | DQNLLGTTYR         | a                        |
| IP00376215        | Splice Isoform 2 Of DNA-dependent           | FNNYVDCMK          | a                        |
| IP00376215        | Splice Isoform 2 Of DNA-dependent           | GQAVTLPPFTSLTGGSL  | a                        |
| IP00376215        | Splice Isoform 2 Of DNA-dependent           | HFGKGGSKLLR        | a                        |
| IP00376215        | Splice Isoform 2 Of DNA-dependent           | LQRAPLK            | a                        |
| IP00376215        | Splice Isoform 2 Of DNA-dependent           | NVDSNNK            | a                        |
| IP00376215        | Splice Isoform 2 Of DNA-dependent           | SKDFVQVMRHR        | a                        |
| IP00219339        | Splice Isoform 2 Of Down syndrome cell      | EAARCKEFS          | a                        |
| IP00219339        | Splice Isoform 2 Of Down syndrome cell      | EPYTVRVEDQKTMIR    | a                        |
| IP00219339        | Splice Isoform 2 Of Down syndrome cell      | SDSWDSAQR          | a                        |
| IP00215945        | Splice Isoform 2 Of Ephrin type-A           | FDEIVNMLDKLIR      | a                        |
| IP00215945        | Splice Isoform 2 Of Ephrin type-A           | CSGPRGAGIIR        | a                        |
| IP00215945        | Splice Isoform 2 Of Ephrin type-A           | WTAPEAIAFRK        | a                        |
| IP00219996        | Splice Isoform 2 Of Epithelial discoidin    | IADFGMSR           | a                        |
| IP00219996        | Splice Isoform 2 Of Epithelial discoidin    | RGPAMAWEGEPMR      | a                        |
| IP00219954        | Splice Isoform 2 Of Exocyst complex         | DDHIGALLAVR        | a                        |
| IP00219954        | Splice Isoform 2 Of Exocyst complex         | RISFRSPEER         | a                        |
| IP00219954        | Splice Isoform 2 Of Exocyst complex         | YPRDRDHIGALLAVR    | a                        |
| IP00163782        | Splice Isoform 2 Of Far upstream element    | AGLVIGK            | a                        |
| IP00455183        | Splice Isoform 2 Of F-box/LRR-repeat        | FKQPEPELPEAPPKTR   | a                        |
| IP00455183        | Splice Isoform 2 Of F-box/LRR-repeat        | GTEMMSQFVRYVETPE   | a                        |
| IP00455183        | Splice Isoform 2 Of F-box/LRR-repeat        | HAAEK              | a                        |
| IP00455183        | Splice Isoform 2 Of F-box/LRR-repeat        | LESLEPK            | a                        |
| IP00455183        | Splice Isoform 2 Of F-box/LRR-repeat        | SHLTQEVQR          | a                        |
| IP00455183        | Splice Isoform 2 Of F-box/LRR-repeat        | YASNLPGSLK         | a                        |
| IP00413958        | Splice Isoform 2 Of Filamin C               | GAGTGGGLGAIHGPEAK  | a                        |
| IP00413958        | Splice Isoform 2 Of Filamin C               | GTEEPVKVR          | a                        |
| IP00413958        | Splice Isoform 2 Of Filamin C               | HVPGSPFTVKVTGEGR   | a                        |
| IP00413958        | Splice Isoform 2 Of Filamin C               | SLTATGGNHVTR       | a                        |
| IP00413958        | Splice Isoform 2 Of Filamin C               | SPPKIKVLPADASK     | a                        |
| IP00216761        | Splice Isoform 2 Of Gamma-tubulin           | AVFRPPGGR          | a                        |
| IP00216761        | Splice Isoform 2 Of Gamma-tubulin           | DAFDK              | a                        |
| IP00219216        | Splice Isoform 2 Of Glutamate receptor 2    | FAYLYSDSR          | a                        |
| IP00219216        | Splice Isoform 2 Of Glutamate receptor 2    | SAEPSVFR           | a                        |
| IP00219216        | Splice Isoform 2 Of Glutamate receptor 2    | WSTLEEKEYPGAHTTIK  | a                        |
| IP00219065        | Splice Isoform 2 Of Glycogen                | DTFIALRGILLITGR    | a                        |
| IP00219065        | Splice Isoform 2 Of Glycogen                | MVNLGLDILK         | a                        |
| IP00219065        | Splice Isoform 2 Of Glycogen                | RFGCTVDMNIALTFIPIH | a                        |
| IP00333197        | Splice Isoform 2 Of GRIP and coiled-coil    | CTELEK             | a                        |
| IP00333197        | Splice Isoform 2 Of GRIP and coiled-coil    | ELMCQEASAK         | a                        |
| IP00333197        | Splice Isoform 2 Of GRIP and coiled-coil    | ENLVKQCEASEKNIQK   | a                        |
| IP00333197        | Splice Isoform 2 Of GRIP and coiled-coil    | EVQSLK             | a                        |
| IP00333197        | Splice Isoform 2 Of GRIP and coiled-coil    | LKNSHEEMDNFHK      | a                        |
| IP00333197        | Splice Isoform 2 Of GRIP and coiled-coil    | QCEASEK            | a                        |
| IP00333197        | Splice Isoform 2 Of GRIP and coiled-coil    | SEIHNEKEK          | a                        |
| IP00216548        | Splice Isoform 2 Of GTP-binding protein     | IHLLESLLEDPWK      | a                        |
| IP00216548        | Splice Isoform 2 Of GTP-binding protein     | VVYVQGVHVAR        | a                        |
| IP00470724        | Splice Isoform 2 Of Hephaestin precursor    | NLREPGSISDK        | a                        |
| IP00470724        | Splice Isoform 2 Of Hephaestin precursor    | RGALDGNPPOR        | a                        |
| IP00220795        | Splice Isoform 2 Of Histone-lysine          | ETMRPSSRVALMVLCEP  | a                        |
| IP00220795        | Splice Isoform 2 Of Histone-lysine          | IAFSSR             | a                        |
| IP00220795        | Splice Isoform 2 Of Histone-lysine          | IAFSSRDIR          | a                        |
| IP00220795        | Splice Isoform 2 Of Histone-lysine          | LQLYRTAK           | a                        |
| IP00220795        | Splice Isoform 2 Of Histone-lysine          | TPLMEAVVNNHLEVAR   | a                        |
| IP00418239        | Splice Isoform 2 Of HIV-1 Rev binding       | ELGGCSQAGNRHCFECA  | a                        |
| IP00418239        | Splice Isoform 2 Of HIV-1 Rev binding       | WPDTPRR            | a                        |
| IP00394746        | Splice Isoform 2 Of Homer protein           | QRHLK              | a                        |
| IP00394746        | Splice Isoform 2 Of Homer protein           | VRSLK              | a                        |
| IP00394746        | Splice Isoform 2 Of Homer protein           | WEIELQTLRESNAR     | a                        |
| IP00219326        | Splice Isoform 2 Of Host cell factor C1     | GAPQPGTILR         | a                        |
| IP00219326        | Splice Isoform 2 Of Host cell factor C1     | RACAAAGTPAVIR      | a                        |
| IP00219326        | Splice Isoform 2 Of Host cell factor C1     | RPMSSEPMK          | a                        |
| IP00219326        | Splice Isoform 2 Of Host cell factor C1     | RPMSSEPMKSAK       | a                        |
| IP00219326        | Splice Isoform 2 Of Host cell factor C1     | SPDGAHLTWEPPSVTSG  | a                        |
| IP00472176        | Splice Isoform 2 Of HpaII tiny fragments    | VILAIR             | a                        |
| IP00220325        | Splice Isoform 2 Of Insulin receptor        | ILTLPR             | a                        |
| IP00220325        | Splice Isoform 2 Of Insulin receptor        | NCMVADFTVK         | a                        |
| IP00220325        | Splice Isoform 2 Of Insulin receptor        | VTDLMR             | a                        |
| IP00220325        | Splice Isoform 2 Of Insulin receptor        | WMAPESLK           | a                        |
| IP00215977        | Splice Isoform 2 Of Insulin-like growth     | FFQYDTWK           | a                        |
| IP00215977        | Splice Isoform 2 Of Insulin-like growth     | GIVECCFR           | a                        |
| IP00215977        | Splice Isoform 2 Of Insulin-like growth     | GLPALLR            | a                        |
| IP00215977        | Splice Isoform 2 Of Insulin-like growth     | SCDLALLETYCATPAK   | a                        |
| IP00186525        | Splice Isoform 2 Of IQ calmodulin-binding   | ILSIAAEVAK         | a                        |
| IP00186525        | Splice Isoform 2 Of IQ calmodulin-binding   | LQHYFMGR           | a                        |
| IP00186525        | Splice Isoform 2 Of IQ calmodulin-binding   | RHLGSPISDVVSR      | a                        |
| IP00219412        | Splice Isoform 2 Of Jumonji/ARID            | EMFIMVQEERR        | a                        |
| IP00219412        | Splice Isoform 2 Of Jumonji/ARID            | FLCPLCMRSRRPR      | a                        |
| IP00219412        | Splice Isoform 2 Of Jumonji/ARID            | MMGLGLMAKDK        | a                        |
| IP00410210        | Splice Isoform 2 Of Latrophilin 1 precursor | ALEEPLLR           | a                        |

| IPI Accession No. | Protein Description                         | Peptide Sequence*  | Primary Source Dataset** |
|-------------------|---------------------------------------------|--------------------|--------------------------|
| IP000410210       | Splice Isoform 2 Of Latrophilin 1 precursor | ELACEGYPIELR       | a                        |
| IP000410210       | Splice Isoform 2 Of Latrophilin 1 precursor | ESAGKNYNK          | a                        |
| IP000410210       | Splice Isoform 2 Of Latrophilin 1 precursor | SYNKMHK            | a                        |
| IP000398365       | Splice Isoform 2 Of Liprin-alpha 3          | ALDEK              | a                        |
| IP000398365       | Splice Isoform 2 Of Liprin-alpha 3          | EDMEER             | a                        |
| IP000398365       | Splice Isoform 2 Of Liprin-alpha 3          | LIQEEK             | a                        |
| IP000398365       | Splice Isoform 2 Of Liprin-alpha 3          | LQPEGQTSGSSR       | a                        |
| IP000398365       | Splice Isoform 2 Of Liprin-alpha 3          | MCEVMTISEDGR       | a                        |
| IP000398365       | Splice Isoform 2 Of Liprin-alpha 3          | VAVLEELLESNQETLNL  | a                        |
| IP000398365       | Splice Isoform 2 Of Liprin-alpha 3          | VMGWVSGLGLK        | a                        |
| IP000179172       | Splice Isoform 2 Of Liprin-beta 1           | EQLEEK             | a                        |
| IP000179172       | Splice Isoform 2 Of Liprin-beta 1           | SASAPTLAETEK       | a                        |
| IP000179172       | Splice Isoform 2 Of Liprin-beta 1           | SRGIMK             | a                        |
| IP000179172       | Splice Isoform 2 Of Liprin-beta 1           | STKDELASLK         | a                        |
| IP000297959       | Splice Isoform 2 Of MAP/microtubule         | EERLPGR            | a                        |
| IP000297959       | Splice Isoform 2 Of MAP/microtubule         | RIEVMVGMGYTR       | a                        |
| IP000297959       | Splice Isoform 2 Of MAP/microtubule         | VTLDPSKR           | a                        |
| IP000256861       | Splice Isoform 2 Of Microtubule-actin       | ATVDMQLAEGGR       | a                        |
| IP000256861       | Splice Isoform 2 Of Microtubule-actin       | DAIEMASR           | a                        |
| IP000256861       | Splice Isoform 2 Of Microtubule-actin       | FLDVLELAEK         | a                        |
| IP000256861       | Splice Isoform 2 Of Microtubule-actin       | IEPMLLETLENSRLR    | a                        |
| IP000256861       | Splice Isoform 2 Of Microtubule-actin       | KSASRPGSRAGSR      | a                        |
| IP000256861       | Splice Isoform 2 Of Microtubule-actin       | LDQCQK             | a                        |
| IP000256861       | Splice Isoform 2 Of Microtubule-actin       | NQSDLK             | a                        |
| IP000256861       | Splice Isoform 2 Of Microtubule-actin       | QQVQFMLKEFEAR      | a                        |
| IP000256861       | Splice Isoform 2 Of Microtubule-actin       | QTTGEEVLLIQEK      | a                        |
| IP000256861       | Splice Isoform 2 Of Microtubule-actin       | SLRPAVER           | a                        |
| IP000256861       | Splice Isoform 2 Of Microtubule-actin       | SQDSVLDPAER        | a                        |
| IP000256861       | Splice Isoform 2 Of Microtubule-actin       | SSLEATREMYTR       | a                        |
| IP000256861       | Splice Isoform 2 Of Microtubule-actin       | VARDIMEIEGEPADHR   | a                        |
| IP000256861       | Splice Isoform 2 Of Microtubule-actin       | VNSGVMMENK         | a                        |
| IP000256861       | Splice Isoform 2 Of Microtubule-actin       | VYQRSIERGR         | a                        |
| IP000219026       | Splice Isoform 2 Of Midline 1 protein       | QNLESNLNLIKR       | a                        |
| IP000470519       | Splice Isoform 2 Of Mitotic spindle         | CTCGARTASLPSSAR    | a                        |
| IP000470519       | Splice Isoform 2 Of Mitotic spindle         | RMLEAQLER          | a                        |
| IP000334410       | Splice Isoform 2 Of Myosin XVIIIIA          | DTKEEMGELAR        | a                        |
| IP000334410       | Splice Isoform 2 Of Myosin XVIIIIA          | EAAEAGRK           | a                        |
| IP000334410       | Splice Isoform 2 Of Myosin XVIIIIA          | GASFEELCHNYTQDRLQ  | a                        |
| IP000334410       | Splice Isoform 2 Of Myosin XVIIIIA          | QMEVMEVMEVMEAR     | a                        |
| IP000333318       | Splice Isoform 2 Of Myosin XVIIIIB          | DVGSQAPEDR         | a                        |
| IP000333318       | Splice Isoform 2 Of Myosin XVIIIIB          | LAGDGGERTSPERR     | a                        |
| IP000333318       | Splice Isoform 2 Of Myosin XVIIIIB          | LQMDALTSMIKR       | a                        |
| IP000333318       | Splice Isoform 2 Of Myosin XVIIIIB          | TSGDKPVPSPHFVRR    | a                        |
| IP000333318       | Splice Isoform 2 Of Myosin XVIIIIB          | WELGLOQQQLKQK      | a                        |
| IP000218614       | Splice Isoform 2 Of NACHT-, LRR- and        | IFQK               | a                        |
| IP000218614       | Splice Isoform 2 Of NACHT-, LRR- and        | RAMEAFNLVR         | a                        |
| IP000409742       | Splice Isoform 2 Of Nedd4-binding protein   | ESVMER             | a                        |
| IP000409742       | Splice Isoform 2 Of Nedd4-binding protein   | ETLMFEK            | a                        |
| IP000409742       | Splice Isoform 2 Of Nedd4-binding protein   | GNHSGGGVAR         | a                        |
| IP000409742       | Splice Isoform 2 Of Nedd4-binding protein   | IMEK               | a                        |
| IP000409742       | Splice Isoform 2 Of Nedd4-binding protein   | MDSFLDMQLTEDLDSLIQ | a                        |
| IP000409742       | Splice Isoform 2 Of Nedd4-binding protein   | MECYSKAK           | a                        |
| IP000409742       | Splice Isoform 2 Of Nedd4-binding protein   | SDVQEAIPYR         | a                        |
| IP000409742       | Splice Isoform 2 Of Nedd4-binding protein   | VENAMDCLELSATDTK   | a                        |
| IP000239406       | Splice Isoform 2 Of Nesprin 2               | EALERLEQSK         | a                        |
| IP000239406       | Splice Isoform 2 Of Nesprin 2               | EAWDGLDHQINAWK     | a                        |
| IP000239406       | Splice Isoform 2 Of Nesprin 2               | GGDPHSEAPFAK       | a                        |
| IP000239406       | Splice Isoform 2 Of Nesprin 2               | ILALAKSVK          | a                        |
| IP000239406       | Splice Isoform 2 Of Nesprin 2               | IMESLPQIQR         | a                        |
| IP000239406       | Splice Isoform 2 Of Nesprin 2               | LESLEK             | a                        |
| IP000239406       | Splice Isoform 2 Of Nesprin 2               | LKMEESQKELSYMMR    | a                        |
| IP000239406       | Splice Isoform 2 Of Nesprin 2               | LPVITSEGGVAERDAS   | a                        |
| IP000239406       | Splice Isoform 2 Of Nesprin 2               | MAIQGFHLIDADR      | a                        |
| IP000239406       | Splice Isoform 2 Of Nesprin 2               | MESICQARAK         | a                        |
| IP000239406       | Splice Isoform 2 Of Nesprin 2               | METVLGQSMSSFLSYR   | a                        |
| IP000239406       | Splice Isoform 2 Of Nesprin 2               | MPLER              | a                        |
| IP000239406       | Splice Isoform 2 Of Nesprin 2               | MSLEEK             | a                        |
| IP000239406       | Splice Isoform 2 Of Nesprin 2               | NIQDSIAKQIEICNR    | a                        |
| IP000239406       | Splice Isoform 2 Of Nesprin 2               | QFHEK              | a                        |
| IP000239406       | Splice Isoform 2 Of Nesprin 2               | QLSLNAQESMK        | a                        |
| IP000239406       | Splice Isoform 2 Of Nesprin 2               | SLOCKQK            | a                        |
| IP000239406       | Splice Isoform 2 Of Nesprin 2               | YKTQFEGMNR         | a                        |
| IP000334532       | Splice Isoform 2 Of Neural cell adhesion    | GQLSFLNR           | a                        |
| IP000304235       | Splice Isoform 2 Of Neurofibromin           | HRNCDK             | a                        |
| IP000304235       | Splice Isoform 2 Of Neurofibromin           | RGSMISVMSSEGNADTP  | a                        |
| IP000304235       | Splice Isoform 2 Of Neurofibromin           | LCQLVEVMMARR       | a                        |
| IP000304235       | Splice Isoform 2 Of Neurofibromin           | DQSEPLGRVLSR       | a                        |
| IP000184861       | Splice Isoform 2 Of Neuroigin 3 precursor   | FLPPEPPPSWSGR      | a                        |
| IP000184861       | Splice Isoform 2 Of Neuroigin 3 precursor   | FMYPDWARDRNPETRR   | a                        |
| IP000184861       | Splice Isoform 2 Of Neuroigin 3 precursor   | VIRTAVEK           | a                        |
| IP000333777       | Splice Isoform 2 Of Neuronal cell           | DNRELPSDER         | a                        |
| IP000333777       | Splice Isoform 2 Of Neuronal cell           | GSMVSFECK          | a                        |
| IP000220339       | Splice Isoform 2 Of Nitric oxide synthase,  | GVRGGRMTLVFGCR     | a                        |
| IP000220339       | Splice Isoform 2 Of Nitric oxide synthase,  | SLFMLKELNNKFR      | a                        |
| IP000220339       | Splice Isoform 2 Of Nitric oxide synthase,  | YMONEYRSR          | a                        |
| IP000173901       | Splice Isoform 2 Of Nuclear receptor        | AIVMEGR            | a                        |
| IP000410351       | Splice Isoform 2 Of Nuclear receptor        | AKESKTR            | a                        |
| IP000173901       | Splice Isoform 2 Of Nuclear receptor        | DAFSAQMVK          | a                        |
| IP000173901       | Splice Isoform 2 Of Nuclear receptor        | DLAGSGTK           | a                        |
| IP000173901       | Splice Isoform 2 Of Nuclear receptor        | ECLNIDIPENWYCNCK   | a                        |
| IP000410351       | Splice Isoform 2 Of Nuclear receptor        | EISSHR             | a                        |
| IP000410351       | Splice Isoform 2 Of Nuclear receptor        | GMPPLEIVPENIKVVERG | a                        |
| IP000173901       | Splice Isoform 2 Of Nuclear receptor        | QMVGGQQLPALAAK     | a                        |
| IP000221364       | Splice Isoform 2 Of Oral-facial-digital     | LHGVCLALGILI       | a                        |
| IP000221364       | Splice Isoform 2 Of Oral-facial-digital     | LNEYK              | a                        |
| IP000394737       | Splice Isoform 2 Of Oxysterol binding       | DGFCEK             | a                        |
| IP000394737       | Splice Isoform 2 Of Oxysterol binding       | MEGGLADGEPDR       | a                        |

| IPI Accession No. | Protein Description                          | Peptide Sequence*  | Primary Source Dataset** |
|-------------------|----------------------------------------------|--------------------|--------------------------|
| IP00394737        | Splice Isoform 2 Of Oxyester binding         | NYREEK             | a                        |
| IP00394737        | Splice Isoform 2 Of Oxyester binding         | VVLPFTLEPR         | a                        |
| IP00334400        | Splice Isoform 2 Of Plakophilin 4            | LELEVPQAR          | a                        |
| IP00334400        | Splice Isoform 2 Of Plakophilin 4            | LYLQSFHSYEDPYFDDR  | a                        |
| IP00334400        | Splice Isoform 2 Of Plakophilin 4            | NMALDVR            | a                        |
| IP00334400        | Splice Isoform 2 Of Plakophilin 4            | NMENAK             | a                        |
| IP00334400        | Splice Isoform 2 Of Plakophilin 4            | YAMRDVNR           | a                        |
| IP00472139        | Splice Isoform 2 Of Plexin D1 precursor      | GPLQPMAGTCAPEIR    | a                        |
| IP00472139        | Splice Isoform 2 Of Plexin D1 precursor      | VLPEIYLTR          | a                        |
| IP00409567        | Splice Isoform 2 Of Polycystin 1 precursor   | AEHSVLRPGDVR       | a                        |
| IP00409567        | Splice Isoform 2 Of Polycystin 1 precursor   | HIWLSWDRPFR        | a                        |
| IP00409567        | Splice Isoform 2 Of Polycystin 1 precursor   | LASERATTVK         | a                        |
| IP00409567        | Splice Isoform 2 Of Polycystin 1 precursor   | LWMGLSK            | a                        |
| IP00444454        | Splice Isoform 2 Of Potential helicase       | IANLAYYTK          | a                        |
| IP00444454        | Splice Isoform 2 Of Potential helicase       | LQEYRVLITLITAGR    | a                        |
| IP00444454        | Splice Isoform 2 Of Potential helicase       | MVPEIDIKPCCNWDAK   | a                        |
| IP00218353        | Splice Isoform 2 Of Probable                 | VLDLQADSR          | a                        |
| IP00221012        | Splice Isoform 2 Of Probable ubiquitin       | MSYRRQK            | a                        |
| IP00221012        | Splice Isoform 2 Of Probable ubiquitin       | NEAKNDALSMIK       | a                        |
| IP00218353        | Splice Isoform 2 Of Probable ubiquitin       | NSINCARQEAIRMVR    | a                        |
| IP00218833        | Splice Isoform 2 Of Probable ubiquitin       | VVIQSSDEIANR       | a                        |
| IP00221012        | Splice Isoform 2 Of Probable ubiquitin       | YECESFTLLNVDIR     | a                        |
| IP00221012        | Splice Isoform 2 Of Probable ubiquitin       | YMPDCVIR           | a                        |
| IP00217331        | Splice Isoform 2 Of Proprotein convertase    | CVSVCPGLVYFGDTAAR  | a                        |
| IP00217331        | Splice Isoform 2 Of Proprotein convertase    | SEMNVQAAWKRGYTGK   | a                        |
| IP00219086        | Splice Isoform 2 Of Protachykinin 1          | EELPEPFEHLQR       | a                        |
| IP00221171        | Splice Isoform 2 Of Proto-oncogene           | ERGPPEGLNEDER      | a                        |
| IP00221171        | Splice Isoform 2 Of Proto-oncogene           | HSSSESPGR          | a                        |
| IP00221171        | Splice Isoform 2 Of Proto-oncogene           | HSWYHGVSRR         | a                        |
| IP00221171        | Splice Isoform 2 Of Proto-oncogene           | RAGENR             | a                        |
| IP00291839        | Splice Isoform 2 Of Rap guanine              | DVGSNIKDEK         | a                        |
| IP00339390        | Splice Isoform 2 Of Regulating synaptic      | CVVRDMAKPAACK      | a                        |
| IP00339390        | Splice Isoform 2 Of Regulating synaptic      | FADGCGHLCSYCR      | a                        |
| IP00339390        | Splice Isoform 2 Of Regulating synaptic      | HHGESSKLLQR        | a                        |
| IP00339390        | Splice Isoform 2 Of Regulating synaptic      | QSRLDPSAVLMLR      | a                        |
| IP00339390        | Splice Isoform 2 Of Regulating synaptic      | WNQTFVYSIHHR       | a                        |
| IP00339390        | Splice Isoform 2 Of Regulating synaptic      | YPVKPPPEEQQMR      | a                        |
| IP00339353        | Splice Isoform 2 Of Rho guanine              | CVIIQK             | a                        |
| IP00339353        | Splice Isoform 2 Of Rho guanine              | EDGAAMR            | a                        |
| IP00339353        | Splice Isoform 2 Of Rho guanine              | LQLLEDVNR          | a                        |
| IP00339353        | Splice Isoform 2 Of Rho guanine              | LTLEK              | a                        |
| IP00339353        | Splice Isoform 2 Of Rho guanine              | SMGLTAESELTG       | a                        |
| IP00339353        | Splice Isoform 2 Of Rho guanine              | VSVPEMISADLEK      | a                        |
| IP00220967        | Splice Isoform 2 Of Ribosome-binding         | EAVEQKQ            | a                        |
| IP00220967        | Splice Isoform 2 Of Ribosome-binding         | ESEELQKRLEVSR      | a                        |
| IP00220967        | Splice Isoform 2 Of Ribosome-binding         | LLATEQEDAATAK      | a                        |
| IP00220967        | Splice Isoform 2 Of Ribosome-binding         | LQEQLEK            | a                        |
| IP00220967        | Splice Isoform 2 Of Ribosome-binding         | SILAETEGMLR        | a                        |
| IP00410257        | Splice Isoform 2 Of RNA polymerase II        | DFLEK              | a                        |
| IP00410257        | Splice Isoform 2 Of RNA polymerase II        | TREHYHATALGAK      | a                        |
| IP00220558        | Splice Isoform 2 Of Ryanodine receptor 1     | DIVGSEAFQDYVTDPR   | a                        |
| IP00220558        | Splice Isoform 2 Of Ryanodine receptor 1     | EDEEKEEAAEAGEK     | a                        |
| IP00220558        | Splice Isoform 2 Of Ryanodine receptor 1     | KAMLIHQEGHMDALSIT  | a                        |
| IP00220558        | Splice Isoform 2 Of Ryanodine receptor 1     | SEDEPDFMK          | a                        |
| IP00220558        | Splice Isoform 2 Of Ryanodine receptor 1     | SRYGLLIKAFSMTAAETA | a                        |
| IP00218501        | Splice Isoform 2 Of Ryanodine receptor 2     | AEGLGMVTEEGSEK     | a                        |
| IP00218501        | Splice Isoform 2 Of Ryanodine receptor 2     | CAPEMHLHAGKGEAIR   | a                        |
| IP00218501        | Splice Isoform 2 Of Ryanodine receptor 2     | EMEKQK             | a                        |
| IP00218501        | Splice Isoform 2 Of Ryanodine receptor 2     | MPNQFLKVDVSRISER   | a                        |
| IP00218501        | Splice Isoform 2 Of Ryanodine receptor 2     | QLHITHRYGEPEVPESAF | a                        |
| IP00218501        | Splice Isoform 2 Of Ryanodine receptor 2     | SSSENKAVYLDSSSHR   | a                        |
| IP00332748        | Splice Isoform 2 Of Sentrin-specific         | ARMK               | a                        |
| IP00332748        | Splice Isoform 2 Of Sentrin-specific         | LSRLQGVVER         | a                        |
| IP00218600        | Splice Isoform 2 Of Signal-regulatory        | ELYNQK             | a; d                     |
| IP00409702        | Splice Isoform 2 Of Slit homolog 1 protein   | MIQPEK             | a                        |
| IP00409702        | Splice Isoform 2 Of Slit homolog 1 protein   | CASPRR             | a                        |
| IP00409702        | Splice Isoform 2 Of Slit homolog 1 protein   | GAFDDMK            | a                        |
| IP00409702        | Splice Isoform 2 Of Slit homolog 1 protein   | GAFDDMKELER        | a                        |
| IP00409702        | Splice Isoform 2 Of Slit homolog 1 protein   | LELNGNNTIRHKNDFAK  | a                        |
| IP00010555        | Splice Isoform 2 Of Sorbin and SH3           | ASSSYR             | a                        |
| IP00010555        | Splice Isoform 2 Of Sorbin and SH3           | EQEEADIAAR         | a                        |
| IP00010555        | Splice Isoform 2 Of Sorbin and SH3           | SATASQPWR          | a                        |
| IP00218207        | Splice Isoform 2 Of Spectrin beta chain,     | FQIQFHR            | a                        |
| IP00218207        | Splice Isoform 2 Of Spectrin beta chain,     | EQWLNGLALPER       | a                        |
| IP00218207        | Splice Isoform 2 Of Spectrin beta chain,     | HQAFMAELAANK       | a                        |
| IP00218207        | Splice Isoform 2 Of Spectrin beta chain,     | IKALADEREAVQK      | a                        |
| IP00218207        | Splice Isoform 2 Of Spectrin beta chain,     | LEALGTGWELGRMWE    | a                        |
| IP00218207        | Splice Isoform 2 Of Spectrin beta chain,     | QEMEAFGK           | a                        |
| IP00232806        | Splice Isoform 2 Of Structural               | ELEKNMVEDSKTAAK    | a                        |
| IP00232806        | Splice Isoform 2 Of Structural               | EMQDK              | a                        |
| IP00232806        | Splice Isoform 2 Of Structural               | RLNYEENK           | a                        |
| IP00232806        | Splice Isoform 2 Of Structural               | KTIENSEETLKNTK     | a                        |
| IP00232806        | Splice Isoform 2 Of Structural               | LEAEMK             | a                        |
| IP00232806        | Splice Isoform 2 Of Structural               | QVVGGRNK           | a                        |
| IP00413874        | Splice Isoform 2 Of Telomerase protein       | AEDFCGTGLR         | a                        |
| IP00413874        | Splice Isoform 2 Of Telomerase protein       | EPGALPSTYR         | a                        |
| IP00413874        | Splice Isoform 2 Of Telomerase protein       | LPPMAMLR           | a                        |
| IP00413874        | Splice Isoform 2 Of Telomerase protein       | NLCNLLRVGISSR      | a                        |
| IP00219099        | Splice Isoform 2 Of Thyroid hormone          | HTPAITR            | a                        |
| IP00219099        | Splice Isoform 2 Of Thyroid hormone          | LIEQNRER           | a                        |
| IP00218901        | Splice Isoform 2 Of TRAF2 and NCK            | SGGSSQVFMTLNR      | a                        |
| IP00218901        | Splice Isoform 2 Of TRAF2 and NCK            | VMDVTGDEEEIK       | a                        |
| IP00412399        | Splice Isoform 2 Of Transient receptor       | DGQDDVVAHQALLKAS   | a                        |
| IP00412399        | Splice Isoform 2 Of Transient receptor       | NKLEK              | a                        |
| IP00394972        | Splice Isoform 2 Of Tripartite motif protein | APDLKGMLEVFRELTVD  | a                        |
| IP00394972        | Splice Isoform 2 Of Tripartite motif protein | TAWILGVCAQFPDAMC   | a                        |
| IP00216134        | Splice Isoform 2 Of Tropomyosin 1 alpha      | AQERLATALQK        | a                        |

| IPI Accession No. | Protein Description                                  | Peptide Sequence*     | Primary Source Dataset** |
|-------------------|------------------------------------------------------|-----------------------|--------------------------|
| IP00216134        | Splice Isoform 2 Of Tropomyosin 1 alpha              | TASSEHLHER            | a                        |
| IP00219886        | Splice Isoform 2 Of Ubiquitin                        | DILAVEDMRNK           | a                        |
| IP00219886        | Splice Isoform 2 Of Ubiquitin                        | ETGQPLVGIETLPPDLR     | a                        |
| IP00219886        | Splice Isoform 2 Of Ubiquitin                        | IMLSLSR               | a                        |
| IP00332347        | Splice Isoform 2 Of Voltage-dependent                | ALFDSLK               | a                        |
| IP00332347        | Splice Isoform 2 Of Voltage-dependent                | SSGNSSSSLGEMVSGTF     | a                        |
| IP00218500        | Splice Isoform 2 Of Zinc finger protein              | ANSMVK                | a                        |
| IP00218500        | Splice Isoform 2 Of Zinc finger protein              | APEELSKDRDADK         | a                        |
| IP00218500        | Splice Isoform 2 Of Zinc finger protein              | ELOJSLK               | a                        |
| IP00218500        | Splice Isoform 2 Of Zinc finger protein              | FSAPSCGSEK            | a                        |
| IP00218500        | Splice Isoform 2 Of Zinc finger protein              | LSPLK                 | a                        |
| IP00218500        | Splice Isoform 2 Of Zinc finger protein              | MDNCHSVSRVK           | a                        |
| IP00218500        | Splice Isoform 2 Of Zinc finger protein              | SPSVKTSRKRPR          | a                        |
| IP00220139        | Splice Isoform 2 Of Zinc finger protein 74           | EKAYK                 | a                        |
| IP00220139        | Splice Isoform 2 Of Zinc finger protein 74           | GEEPWSMQREVPR         | a                        |
| IP00220139        | Splice Isoform 2 Of Zinc finger protein 74           | LLCVVPRAGR            | a                        |
| IP00220139        | Splice Isoform 2 Of Zinc finger protein 74           | QAGALQRSQAAPGR        | a                        |
| IP00220139        | Splice Isoform 2 Of Zinc finger protein 74           | VPEGGPLLDTRK          | a                        |
| IP00216505        | Splice Isoform 3 Of Afadin                           | EALRQASDK             | a                        |
| IP00216505        | Splice Isoform 3 Of Afadin                           | GAGQDK                | a                        |
| IP00216505        | Splice Isoform 3 Of Afadin                           | TISNPEVMK             | a                        |
| IP00220625        | Splice Isoform 3 Of A-kinase anchor                  | ACMFEPLIKLSK          | a                        |
| IP00220625        | Splice Isoform 3 Of A-kinase anchor                  | EKLELSQR              | a                        |
| IP00220625        | Splice Isoform 3 Of A-kinase anchor                  | FLDEQAIDR             | a                        |
| IP00220625        | Splice Isoform 3 Of A-kinase anchor                  | GEMENALR              | a                        |
| IP00220625        | Splice Isoform 3 Of A-kinase anchor                  | IETMQFEK              | a                        |
| IP00220625        | Splice Isoform 3 Of A-kinase anchor                  | LAQFRQR               | a                        |
| IP00220625        | Splice Isoform 3 Of A-kinase anchor                  | MEDEER                | a                        |
| IP00220625        | Splice Isoform 3 Of A-kinase anchor                  | MKSSVFDEDK            | a                        |
| IP00220625        | Splice Isoform 3 Of A-kinase anchor                  | NLQLNLLLEQK           | a                        |
| IP00220625        | Splice Isoform 3 Of A-kinase anchor                  | VEDLQRQLEEKR          | a                        |
| IP00473119        | Splice Isoform 3 Of Bullous pemphigoid               | ATTMGTDLVLAICHDPDSITT | a                        |
| IP00473119        | Splice Isoform 3 Of Bullous pemphigoid               | EQLDHDHSLGSAQVSNK     | a                        |
| IP00217992        | Splice Isoform 3 Of Bullous pemphigoid               | EVQFQPPGAPEK          | a                        |
| IP00473119        | Splice Isoform 3 Of Bullous pemphigoid               | GQQLMARCPK            | a                        |
| IP00473119        | Splice Isoform 3 Of Bullous pemphigoid               | ILRSTVMVR             | a                        |
| IP00473119        | Splice Isoform 3 Of Bullous pemphigoid               | ILTTEQTK              | a                        |
| IP00473119        | Splice Isoform 3 Of Bullous pemphigoid               | LEALMASDNANK          | a                        |
| IP00473119        | Splice Isoform 3 Of Bullous pemphigoid               | LLDVMLEAK             | a                        |
| IP00473119        | Splice Isoform 3 Of Bullous pemphigoid               | LLNTRSNOER            | a                        |
| IP00473119        | Splice Isoform 3 Of Bullous pemphigoid               | MVAEDNER              | a                        |
| IP00217992        | Splice Isoform 3 Of Bullous pemphigoid               | NICPQTKRK             | a                        |
| IP00473119        | Splice Isoform 3 Of Bullous pemphigoid               | QFHEAWSK              | a                        |
| IP00217992        | Splice Isoform 3 Of Bullous pemphigoid               | QLTIEAEAKR            | a                        |
| IP00217992        | Splice Isoform 3 Of Bullous pemphigoid               | QNNETKLMQJR           | a                        |
| IP00473119        | Splice Isoform 3 Of Bullous pemphigoid               | QPPSISAEVEK           | a                        |
| IP00473119        | Splice Isoform 3 Of Bullous pemphigoid               | QRGEEMIAIAR           | a                        |
| IP00473119        | Splice Isoform 3 Of Bullous pemphigoid               | STQVQSLLR             | a                        |
| IP00473119        | Splice Isoform 3 Of Bullous pemphigoid               | TLTAQSHMYEK           | a                        |
| IP00473119        | Splice Isoform 3 Of Bullous pemphigoid               | TSLADBNKLDLMLSELR     | a                        |
| IP00217992        | Splice Isoform 3 Of Bullous pemphigoid               | TSSEKAR               | a                        |
| IP00217992        | Splice Isoform 3 Of Bullous pemphigoid               | VRQLTIEAEAKR          | a                        |
| IP00473119        | Splice Isoform 3 Of Bullous pemphigoid               | WDSLTLGQSDR           | a                        |
| IP00473119        | Splice Isoform 3 Of Bullous pemphigoid               | WQNVHVQIDNRLR         | a                        |
| IP00328278        | Splice Isoform 3 Of CDK5 regulatory                  | FTSPHPK               | a                        |
| IP00328278        | Splice Isoform 3 Of CDK5 regulatory                  | MVDLAGPDYRDLPR        | a                        |
| IP00328278        | Splice Isoform 3 Of CDK5 regulatory                  | SATDLGCRNDGNLK        | a                        |
| IP00219193        | Splice Isoform 3 Of Cold                             | EGRTNVPGRSR           | a                        |
| IP00219193        | Splice Isoform 3 Of Cold                             | EGRTNVPGRSLK          | a                        |
| IP00219193        | Splice Isoform 3 Of Cold                             | FQCIEDNAR             | a                        |
| IP00219193        | Splice Isoform 3 Of Cold                             | MHLEDYPPQK            | a                        |
| IP00219193        | Splice Isoform 3 Of Cold                             | TNVPGRSLK             | a                        |
| IP00219193        | Splice Isoform 3 Of Cold                             | VESLSLGFHLMNPK        | a                        |
| IP00413923        | Splice Isoform 3 Of Collagen alpha 3                 | DGVPGFPGSEGVKGNR      | a                        |
| IP00413923        | Splice Isoform 3 Of Collagen alpha 3                 | GDSGSPATWTR           | a                        |
| IP00413923        | Splice Isoform 3 Of Collagen alpha 3                 | GNRGVPGMPGLK          | a                        |
| IP00413923        | Splice Isoform 3 Of Collagen alpha 3                 | GVPGMPGLK             | a                        |
| IP00300386        | Splice Isoform 3 Of COP1 signalosome                 | FYESK                 | a                        |
| IP00215615        | Splice Isoform 3 Of Copper-transporting              | DRSASHLDHKKR          | a                        |
| IP00215615        | Splice Isoform 3 Of Copper-transporting              | EWMIK                 | a                        |
| IP00215615        | Splice Isoform 3 Of Copper-transporting              | GMPVVDK               | a                        |
| IP00215615        | Splice Isoform 3 Of Copper-transporting              | ISHHKILAVGTAESNSEH    | a                        |
| IP00215615        | Splice Isoform 3 Of Copper-transporting              | LLFLR                 | a                        |
| IP00215615        | Splice Isoform 3 Of Copper-transporting              | LVEEAQYSK             | a                        |
| IP00215615        | Splice Isoform 3 Of Copper-transporting              | MTQLTVEK              | a                        |
| IP00215615        | Splice Isoform 3 Of Copper-transporting              | QIEAMGFPAFK           | a                        |
| IP00215615        | Splice Isoform 3 Of Copper-transporting              | SMGLEVLMTGDNSK        | a                        |
| IP00215615        | Splice Isoform 3 Of Copper-transporting              | SSSGTVNLLLEEVGLHIR    | a                        |
| IP00394761        | Splice Isoform 3 Of CLUB and sushi                   | FSILNEGGIK            | a                        |
| IP00394761        | Splice Isoform 3 Of CLUB and sushi                   | LMLRIYLIK             | a                        |
| IP00394761        | Splice Isoform 3 Of CLUB and sushi                   | SSAVCRK               | a                        |
| IP00394657        | Splice Isoform 3 Of Histone                          | NQDNEDEWPLAEISVK      | a                        |
| IP00394657        | Splice Isoform 3 Of Histone                          | SESGERQITINEISETSI    | a                        |
| IP00216222        | Splice Isoform 3 Of Integrin alpha-6                 | LGAAFNLDITREDNVIR     | a                        |
| IP00216222        | Splice Isoform 3 Of Integrin alpha-6                 | SRPVNIQK              | a                        |
| IP00220749        | Splice Isoform 3 Of Integrin alpha-7                 | DMIGRCFVLSQDLAIR      | a                        |
| IP00220749        | Splice Isoform 3 Of Integrin alpha-7                 | GAVVILR               | a                        |
| IP00220749        | Splice Isoform 3 Of Integrin alpha-7                 | VCGDAMFQLQENVK        | a                        |
| IP00220749        | Splice Isoform 3 Of Integrin alpha-7                 | VDQILETRDMIGR         | a                        |
| IP00410370        | Splice Isoform 3 Of MICAL-like protein 2             | AGSCRTQEFR            | a                        |
| IP00472094        | Splice Isoform 3 Of Microtubule-associated protein 2 | LDTVLEK               | a                        |
| IP00472094        | Splice Isoform 3 Of Microtubule-associated protein 2 | NKDDLTLRSLSLGLGR      | a                        |
| IP00220154        | Splice Isoform 3 Of Myosin Va                        | GVAVNLPGLPAYILFMCV    | a                        |
| IP00220154        | Splice Isoform 3 Of Myosin Va                        | HADYLNDDQKVR          | a                        |
| IP00220154        | Splice Isoform 3 Of Myosin Va                        | KVDEQNK               | a                        |
| IP00220154        | Splice Isoform 3 Of Myosin Va                        | LGNAQNFNYTK           | a                        |
| IP00220154        | Splice Isoform 3 Of Myosin Va                        | RMAK                  | a                        |

| IPI Accession No. | Protein Description                        | Peptide Sequence*  | Primary Source Dataset** |
|-------------------|--------------------------------------------|--------------------|--------------------------|
| IP100220154       | Splice Isoform 3 Of Myosin Va              | SEKKCEEHADR        | a                        |
| IP100220154       | Splice Isoform 3 Of Myosin Va              | TVGHQFR            | a                        |
| IP100000958       | Splice Isoform 3 Of Peroxisomal            | FRVPSSTADFPVGVV    | a                        |
| IP100000958       | Splice Isoform 3 Of Peroxisomal            | MIEGICAFPSVAFYK    | a                        |
| IP100000958       | Splice Isoform 3 Of Peroxisomal            | QLRPVVK            | a                        |
| IP100000958       | Splice Isoform 3 Of Peroxisomal            | QTYNIPGGR          | a                        |
| IP100217648       | Splice Isoform 3 Of Potassium              | LQNFLYNVLEPR       | a                        |
| IP100333632       | Splice Isoform 3 Of Protein C14orf94       | ARLQQEVEEQLK       | a                        |
| IP100333632       | Splice Isoform 3 Of Protein C14orf94       | EIPPLLGLEK         | a                        |
| IP100333632       | Splice Isoform 3 Of Protein C14orf94       | LQQEVEEQLKK        | a                        |
| IP100333632       | Splice Isoform 3 Of Protein C14orf94       | SAAYSQVLLR         | a                        |
| IP100337696       | Splice Isoform 3 Of Rap guanine            | IDSRLDKVTR         | a                        |
| IP100337696       | Splice Isoform 3 Of Rap guanine            | KPPER              | a                        |
| IP100337696       | Splice Isoform 3 Of Rap guanine            | LLEWFK             | a                        |
| IP100337696       | Splice Isoform 3 Of Rap guanine            | MTSANMDPAMFMR      | a                        |
| IP100337696       | Splice Isoform 3 Of Rap guanine            | MTSANMDPAMFRQR     | a                        |
| IP100337696       | Splice Isoform 3 Of Rap guanine            | NLSSQSQMPIPLFPVV   | a                        |
| IP100337696       | Splice Isoform 3 Of Rap guanine            | QFGGK              | a                        |
| IP100337696       | Splice Isoform 3 Of Rap guanine            | SSEMSPPMRSAGQTK    | a                        |
| IP100332272       | Splice Isoform 3 Of Receptor-type          | MLWENNSTHIVMLTK    | a                        |
| IP100332272       | Splice Isoform 3 Of Receptor-type          | VEAALNATAIR        | a                        |
| IP100332272       | Splice Isoform 3 Of Receptor-type          | VLWRSAPAGR         | a                        |
| IP100332272       | Splice Isoform 3 Of Receptor-type          | WMQGAEDLTPEDDMPV   | a                        |
| IP100332272       | Splice Isoform 3 Of Receptor-type          | YSSPANLYVRVR       | a                        |
| IP100339348       | Splice Isoform 3 Of Regulating synaptic    | DLPSREDGRPR        | a                        |
| IP100339348       | Splice Isoform 3 Of Regulating synaptic    | ISMLRMDRFRQR       | a                        |
| IP100339348       | Splice Isoform 3 Of Regulating synaptic    | NWMTROASR          | a                        |
| IP100339348       | Splice Isoform 3 Of Regulating synaptic    | SAPSPALS           | a                        |
| IP100220660       | Splice Isoform 3 Of Regulator of G-protein | KMEDVIAR           | a                        |
| IP100220660       | Splice Isoform 3 Of Regulator of G-protein | MQDEK              | a                        |
| IP100220660       | Splice Isoform 3 Of Regulator of G-protein | RPIKEVPSR          | a                        |
| IP100220660       | Splice Isoform 3 Of Regulator of G-protein | RTMQNK             | a                        |
| IP100220165       | Splice Isoform 3 Of SH3 and multiple       | MNDRALK            | a                        |
| IP100220165       | Splice Isoform 3 Of SH3 and multiple       | QVVMIRQGGNTLMVK    | a                        |
| IP100220165       | Splice Isoform 3 Of SH3 and multiple       | SMSVDDAHFSMMVFR    | a                        |
| IP100337744       | Splice Isoform 3 Of Sodium channel         | AEEGR              | a                        |
| IP100337744       | Splice Isoform 3 Of Sodium channel         | DSLFIPIRAR         | a                        |
| IP100154944       | Splice Isoform 3 Of Sodium channel         | EFILK              | a                        |
| IP100337744       | Splice Isoform 3 Of Sodium channel         | GGSLVYSDMLASYGR    | a                        |
| IP100218522       | Splice Isoform 3 Of Sodium channel         | KQEEVSAIQRNFR      | a                        |
| IP100154944       | Splice Isoform 3 Of Sodium channel         | LSSGEEK            | a                        |
| IP100218522       | Splice Isoform 3 Of Sodium channel         | LSSYQISMEDLSSGR    | a                        |
| IP100154944       | Splice Isoform 3 Of Sodium channel         | SECFALMNVSQNVR     | a                        |
| IP100154944       | Splice Isoform 3 Of Sodium channel         | SESEDSIRRK         | a                        |
| IP100218522       | Splice Isoform 3 Of Sodium channel         | YMTLVLSR           | a                        |
| IP100237806       | Splice Isoform 3 Of Spectrin beta chain,   | DEEGAVMLKR         | a                        |
| IP100237806       | Splice Isoform 3 Of Spectrin beta chain,   | EDIGOR             | a                        |
| IP100237806       | Splice Isoform 3 Of Spectrin beta chain,   | FQIQDIVQTEGR       | a                        |
| IP100237806       | Splice Isoform 3 Of Spectrin beta chain,   | LGHLQSSWR          | a                        |
| IP100237806       | Splice Isoform 3 Of Spectrin beta chain,   | MQLLAASYDLIR       | a                        |
| IP100237806       | Splice Isoform 3 Of Spectrin beta chain,   | TFTKVVNSHLARVSCR   | a                        |
| IP100237806       | Splice Isoform 3 Of Spectrin beta chain,   | TQLVDTADK          | a                        |
| IP100237806       | Splice Isoform 3 Of Spectrin beta chain,   | WVNSHLAR           | a                        |
| IP100237806       | Splice Isoform 3 Of Spectrin beta chain,   | IHHLDMLKSOQRK      | a                        |
| IP100218512       | Splice Isoform 3 Of Tufetin                | MHEK               | a                        |
| IP100218512       | Splice Isoform 3 Of Tufetin                | ALELYK             | a                        |
| IP100219198       | Splice Isoform 3 Of Ubiquitin-protein      | DEKDEDEK           | a                        |
| IP100219198       | Splice Isoform 3 Of Ubiquitin-protein      | ENGDK              | a                        |
| IP100219198       | Splice Isoform 3 Of Ubiquitin-protein      | MATAACKR           | a                        |
| IP100478023       | Splice Isoform 4 Of                        | VVMITGDNK          | a                        |
| IP100216562       | Splice Isoform 4 Of Cadherin-23            | ASDNGSPPR          | a                        |
| IP100216562       | Splice Isoform 4 Of Cadherin-23            | ASSNRSWTPPR        | a                        |
| IP100216562       | Splice Isoform 4 Of Cadherin-23            | AVDGGVGHQNK        | a                        |
| IP100216562       | Splice Isoform 4 Of Cadherin-23            | DAYYGALRENEPSVTQL  | a                        |
| IP100216562       | Splice Isoform 4 Of Cadherin-23            | GLGRSLETLTAAEATAFE | a                        |
| IP100216562       | Splice Isoform 4 Of Cadherin-23            | YLRAAIQYDNIAR      | a                        |
| IP100384418       | Splice Isoform 4 Of CDK5 regulatory        | GSRDK              | a                        |
| IP100384418       | Splice Isoform 4 Of CDK5 regulatory        | HVKILGPLAEPMSDR    | a                        |
| IP100384418       | Splice Isoform 4 Of CDK5 regulatory        | LLAEMDIQTQEAPSSTSQ | a                        |
| IP100384418       | Splice Isoform 4 Of CDK5 regulatory        | LLQLSK             | a                        |
| IP100384418       | Splice Isoform 4 Of CDK5 regulatory        | LRQQLSQNDK         | a                        |
| IP100410375       | Splice Isoform 4 Of Cytosolic              | IYEQGLEK           | a                        |
| IP100410375       | Splice Isoform 4 Of Cytosolic              | NEPCMRSSK          | a                        |
| IP100410375       | Splice Isoform 4 Of Cytosolic              | QKKNEPGMR          | a                        |
| IP100410375       | Splice Isoform 4 Of Cytosolic              | SLGWMS             | a                        |
| IP100218754       | Splice Isoform 4 Of DNA topoisomerase      | DPKMSCR            | a                        |
| IP100218754       | Splice Isoform 4 Of DNA topoisomerase      | MEVSPLOPVNEMQVNK   | a                        |
| IP100218754       | Splice Isoform 4 Of DNA topoisomerase      | MQSLDK             | a                        |
| IP100218754       | Splice Isoform 4 Of DNA topoisomerase      | YLEEDEDLDF         | a                        |
| IP100304639       | Splice Isoform 4 Of Dystrophin             | EALKGKLEKTVSLQK    | a                        |
| IP100304639       | Splice Isoform 4 Of Dystrophin             | EKGQGGPMLDADFVAF   | a                        |
| IP100304639       | Splice Isoform 4 Of Dystrophin             | ELHEEAVR           | a                        |
| IP100304639       | Splice Isoform 4 Of Dystrophin             | ELNDWLTKTEER       | a                        |
| IP100304639       | Splice Isoform 4 Of Dystrophin             | ELPPEEAQNTR        | a                        |
| IP100304639       | Splice Isoform 4 Of Dystrophin             | EMSKKAPSEIR        | a                        |
| IP100304639       | Splice Isoform 4 Of Dystrophin             | IFNQWLTEAEQFLR     | a                        |
| IP100304639       | Splice Isoform 4 Of Dystrophin             | MEDEREVQK          | a                        |
| IP100304639       | Splice Isoform 4 Of Dystrophin             | RAKEAQKQK          | a                        |
| IP100477005       | Splice Isoform 4 Of E1A binding protein    | DYQK               | a                        |
| IP100477005       | Splice Isoform 4 Of E1A binding protein    | ERNSEDAMTAVR       | a                        |
| IP100477005       | Splice Isoform 4 Of E1A binding protein    | GGEVVK             | a                        |
| IP100477005       | Splice Isoform 4 Of E1A binding protein    | GSARVTVSVK         | a                        |
| IP100477005       | Splice Isoform 4 Of E1A binding protein    | KKHYAPLQAYLR       | a                        |
| IP100477005       | Splice Isoform 4 Of E1A binding protein    | NLNGLADEAGLGK      | a                        |
| IP100477005       | Splice Isoform 4 Of E1A binding protein    | RCSQAPVYGRDLLR     | a                        |
| IP100220522       | Splice Isoform 4 Of Golgi autoantigen,     | CEQEKETLLK         | a                        |
| IP100220522       | Splice Isoform 4 Of Golgi autoantigen,     | EQEVAELK           | a                        |

| IPI Accession No. | Protein Description                      | Peptide Sequence*   | Primary Source Dataset** |
|-------------------|------------------------------------------|---------------------|--------------------------|
| IP10020522        | Splice Isoform 4 Of Golgi autoantigen.   | ISHCQHRITK          | a                        |
| IP100220522       | Splice Isoform 4 Of Golgi autoantigen.   | QYDEEK              | a                        |
| IP100220522       | Splice Isoform 4 Of Golgi autoantigen.   | YLFEYMMGR           | a                        |
| IP100337505       | Splice Isoform 4 Of High-affinity        | SISSRGSDFPSLQNR     | a                        |
| IP100337505       | Splice Isoform 4 Of High-affinity        | TLDDLK              | a                        |
| IP100217562       | Splice Isoform 4 Of Integrin beta-1      | GICEGVCK            | a                        |
| IP100217562       | Splice Isoform 4 Of Integrin beta-1      | ILFIR               | a                        |
| IP100217562       | Splice Isoform 4 Of Integrin beta-1      | LKPEDIHQIQPQLVRL    | a                        |
| IP100217562       | Splice Isoform 4 Of Integrin beta-1      | SLGTDLMNEMR         | a                        |
| IP100425409       | Splice Isoform 4 Of Kinesin family       | AVLCVSDTDDLFTGSK    | a                        |
| IP100425409       | Splice Isoform 4 Of Kinesin family       | DSAKCIR             | a                        |
| IP100425409       | Splice Isoform 4 Of Kinesin family       | IKAMQETVDALRSR      | a                        |
| IP100425409       | Splice Isoform 4 Of Kinesin family       | LQAAQKEHAR          | a                        |
| IP100425409       | Splice Isoform 4 Of Kinesin family       | LQAMNKELQRLQAAQK    | a                        |
| IP100425409       | Splice Isoform 4 Of Kinesin family       | QVRPMSDK            | a                        |
| IP100425409       | Splice Isoform 4 Of Kinesin family       | RDHQLR              | a                        |
| IP100425409       | Splice Isoform 4 Of Kinesin family       | RKTEVTALR           | a                        |
| IP100425409       | Splice Isoform 4 Of Kinesin family       | DLEGIRESLLR         | a                        |
| IP100452250       | Splice Isoform 4 Of Kinesin-like motor   | EQTLALR             | a                        |
| IP100452250       | Splice Isoform 4 Of Kinesin-like motor   | ERQLQYLLQNHLPITLEE  | a                        |
| IP100452250       | Splice Isoform 4 Of Kinesin-like motor   | IHLVDLAGSERADATGAT  | a                        |
| IP100452250       | Splice Isoform 4 Of Kinesin-like motor   | VASSLPVSAEK         | a                        |
| IP100452250       | Splice Isoform 4 Of Kinesin-like motor   | GESLDNLDSPR         | a                        |
| IP100409593       | Splice Isoform 4 Of LIM domain only      | IDFTSGPR            | a                        |
| IP100409593       | Splice Isoform 4 Of LIM domain only      | LFQK                | a                        |
| IP100409593       | Splice Isoform 4 Of LIM domain only      | RRMYSFDDVLEEGK      | a                        |
| IP100409593       | Splice Isoform 4 Of LIM domain only      | SRSTTELDYSTNK       | a                        |
| IP100409593       | Splice Isoform 4 Of LIM domain only      | SSDREGTRAGEER       | a                        |
| IP100219801       | Splice Isoform 4 Of Mitogen-activated    | DIKGGQVLLTENAEVK    | a                        |
| IP100219801       | Splice Isoform 4 Of Mitogen-activated    | EDWIAVISR           | a                        |
| IP100247295       | Splice Isoform 4 Of Nesprin 1            | ALESLRQDWQAYQHR     | a                        |
| IP100247295       | Splice Isoform 4 Of Nesprin 1            | ALRLEELHSKVNLDLK    | a                        |
| IP100247295       | Splice Isoform 4 Of Nesprin 1            | DIANVMQR            | a                        |
| IP100247295       | Splice Isoform 4 Of Nesprin 1            | DLESAMSR            | a                        |
| IP100247295       | Splice Isoform 4 Of Nesprin 1            | DLTRAQMVESNLQDK     | a                        |
| IP100247295       | Splice Isoform 4 Of Nesprin 1            | EHMTLEK             | a                        |
| IP100247295       | Splice Isoform 4 Of Nesprin 1            | EMSEMDKNK           | a                        |
| IP100247295       | Splice Isoform 4 Of Nesprin 1            | EPTRQALQQR          | a                        |
| IP100247295       | Splice Isoform 4 Of Nesprin 1            | GQEILDALQKAEPK      | a                        |
| IP100247295       | Splice Isoform 4 Of Nesprin 1            | HEAVSLQKSCITQASLQE  | a                        |
| IP100247295       | Splice Isoform 4 Of Nesprin 1            | KFEESRALEK          | a                        |
| IP100247295       | Splice Isoform 4 Of Nesprin 1            | KISFAVQK            | a                        |
| IP100247295       | Splice Isoform 4 Of Nesprin 1            | LHLEQLDER           | a                        |
| IP100247295       | Splice Isoform 4 Of Nesprin 1            | LKETLVAVQQLDKNMSSL  | a                        |
| IP100247295       | Splice Isoform 4 Of Nesprin 1            | LKHFIGQR            | a                        |
| IP100247295       | Splice Isoform 4 Of Nesprin 1            | LNALPR              | a                        |
| IP100247295       | Splice Isoform 4 Of Nesprin 1            | LNMMLSK             | a                        |
| IP100247295       | Splice Isoform 4 Of Nesprin 1            | LQDEQEVQK           | a                        |
| IP100247295       | Splice Isoform 4 Of Nesprin 1            | MLHLVLYHRLK         | a                        |
| IP100247295       | Splice Isoform 4 Of Nesprin 1            | QHAELR              | a                        |
| IP100247295       | Splice Isoform 4 Of Nesprin 1            | QTVEATNSMINK        | a                        |
| IP100247295       | Splice Isoform 4 Of Nesprin 1            | TLTLEK              | a                        |
| IP100247295       | Splice Isoform 4 Of Nesprin 1            | VLFTSLADNK          | a                        |
| IP100247295       | Splice Isoform 4 Of Nesprin 1            | EASENETDMEDPR       | a                        |
| IP100239409       | Splice Isoform 4 Of Nesprin 2            | SMERRMK             | a                        |
| IP100239409       | Splice Isoform 4 Of Nesprin 2            | VPGTRPQRSFSLSRVVR   | a                        |
| IP100239409       | Splice Isoform 4 Of Nesprin 2            | AVHADSVRRIGHL       | a                        |
| IP100441954       | Splice Isoform 4 Of Ninein               | QMLPEEQK            | a                        |
| IP100218326       | Splice Isoform 4 Of Nuclear autoantigen  | STSTWRIPSR          | a                        |
| IP100218326       | Splice Isoform 4 Of Nuclear autoantigen  | ADVGFAMGIACITDVAK   | a                        |
| IP100219258       | Splice Isoform 4 Of Plasma membrane      | AGITVRMVTGDINNTAR   | a                        |
| IP100219258       | Splice Isoform 4 Of Plasma membrane      | EETPEEELNEDVEEIDHAE | a                        |
| IP100219258       | Splice Isoform 4 Of Plasma membrane      | LDKVWPK             | a                        |
| IP100219258       | Splice Isoform 4 Of Plasma membrane      | MPDGGFR             | a                        |
| IP100219258       | Splice Isoform 4 Of Plasma membrane      | TLMELRGAEALQK       | a                        |
| IP100329752       | Splice Isoform 4 Of Ras and Rab          | AYSPEKK             | a                        |
| IP100329752       | Splice Isoform 4 Of Ras and Rab          | GPVGPCCR            | a                        |
| IP100329752       | Splice Isoform 4 Of Ras and Rab          | NLPTAPPR            | a                        |
| IP100329752       | Splice Isoform 4 Of Ras and Rab          | VVAGMFLVR           | a                        |
| IP100219495       | Splice Isoform 4 Of Short transient      | CNCVCEVSSDVSRLH     | a                        |
| IP100219495       | Splice Isoform 4 Of Short transient      | DDNSLIEQSGNDLAR     | a                        |
| IP100219495       | Splice Isoform 4 Of Short transient      | RNVNAPYR            | a                        |
| IP100219495       | Splice Isoform 4 Of Short transient      | SDSEEVAR            | a                        |
| IP100479402       | Splice Isoform 4 Of Transient receptor   | EATNVR              | a                        |
| IP100479402       | Splice Isoform 4 Of Transient receptor   | EEICMQNTFNFLSK      | a                        |
| IP100479402       | Splice Isoform 4 Of Transient receptor   | ICKIKNLGSGEIGQAW    | a                        |
| IP100479402       | Splice Isoform 4 Of Transient receptor   | IRVTSERVTEMYFQK     | a                        |
| IP100479402       | Splice Isoform 4 Of Transient receptor   | YMTGEFR             | a                        |
| IP100217498       | Splice Isoform 4 Of Voltage-dependent    | AEDFLR              | a                        |
| IP100455036       | Splice Isoform 4 Of Voltage-dependent    | DSVDLAELVPAVGAHPR   | a                        |
| IP100455036       | Splice Isoform 4 Of Voltage-dependent    | GRGLFSLR            | a                        |
| IP100455036       | Splice Isoform 4 Of Voltage-dependent    | RALGLYQALQSR        | a                        |
| IP100455036       | Splice Isoform 4 Of Voltage-dependent    | SAAWASRR            | a                        |
| IP100217498       | Splice Isoform 4 Of Voltage-dependent    | SPSEGREHMAHR        | a                        |
| IP100455036       | Splice Isoform 4 Of Voltage-dependent    | SSVMSLGRMYSIDQRLS   | a                        |
| IP100217498       | Splice Isoform 4 Of Voltage-dependent    | TGADGEHR            | a                        |
| IP100217498       | Splice Isoform 4 Of Voltage-dependent    | TSEMRQNLLASR        | a                        |
| IP100217498       | Splice Isoform 4 Of Voltage-dependent    | VPPEENQRHHQR        | a                        |
| IP100219925       | Splice Isoform 5 Of Collagen alpha 2(XI) | FGSGGGDKGPVVAQEA    | a                        |
| IP100219925       | Splice Isoform 5 Of Collagen alpha 2(XI) | GQDQAK              | a                        |
| IP100219925       | Splice Isoform 5 Of Collagen alpha 2(XI) | SPOQQPSR            | a                        |
| IP100382699       | Splice Isoform 5 Of Filamin B            | GPKGLEELVK          | a                        |
| IP100382699       | Splice Isoform 5 Of Filamin B            | IAGPGLGSGVR         | a                        |
| IP100382699       | Splice Isoform 5 Of Filamin B            | IAGPGLGSGVVAR       | a                        |
| IP100215724       | Splice Isoform 5 Of Fragile X mental     | GSRPVRNR            | a                        |
| IP100215724       | Splice Isoform 5 Of Fragile X mental     | LDVPEDLR            | a                        |
| IP100215724       | Splice Isoform 5 Of Fragile X mental     | QLESSR              | a                        |

| IPI Accession No. | Protein Description                        | Peptide Sequence*  | Primary Source Dataset** |
|-------------------|--------------------------------------------|--------------------|--------------------------|
| IP00441955        | Splice Isoform 5 Of Ninein                 | AHEQAVK            | a                        |
| IP00441955        | Splice Isoform 5 Of Ninein                 | EKFTSLVLTQEREMLEK  | a                        |
| IP00441955        | Splice Isoform 5 Of Ninein                 | ENDCLQEELR         | a                        |
| IP00441955        | Splice Isoform 5 Of Ninein                 | LDEEYK             | a                        |
| IP00441955        | Splice Isoform 5 Of Ninein                 | QEMMSK             | a                        |
| IP00441955        | Splice Isoform 5 Of Ninein                 | RLLEK              | a                        |
| IP00220110        | Splice Isoform 5 Of Transcriptional        | KCILR              | a                        |
| IP00220110        | Splice Isoform 5 Of Transcriptional        | LTVSDGESGEEK       | a                        |
| IP00220110        | Splice Isoform 5 Of Transcriptional        | QTQSESSNYDSELEK    | a                        |
| IP00220110        | Splice Isoform 5 Of Transcriptional        | SKNGAYGREK         | a                        |
| IP00220110        | Splice Isoform 5 Of Transcriptional        | VVDQQQVER          | a                        |
| IP00220110        | Splice Isoform 5 Of Transcriptional        | VYEHTSR            | a                        |
| IP00219872        | Splice Isoform 6 Of Catenin delta-1        | HVSAQLER           | a                        |
| IP00219872        | Splice Isoform 6 Of Catenin delta-1        | NKELIGK            | a                        |
| IP00339226        | Splice Isoform 6 Of Fibronectin precursor  | ESKPLTAQQTTK       | a                        |
| IP00339226        | Splice Isoform 6 Of Fibronectin precursor  | VFAVSHGR           | a                        |
| IP00339226        | Splice Isoform 6 Of Fibronectin precursor  | WCHDNGVNYK         | a                        |
| IP00339226        | Splice Isoform 6 Of Fibronectin precursor  | WSRPQAPITGYR       | a                        |
| IP00215758        | Splice Isoform 6 Of Myosin VIIa            | CIKPNFEKPKMLFDR    | a                        |
| IP00215758        | Splice Isoform 6 Of Myosin VIIa            | IEQYLLEKSRVCR      | a                        |
| IP00215758        | Splice Isoform 6 Of Myosin VIIa            | LHQQYRLAR          | a                        |
| IP00215758        | Splice Isoform 6 Of Myosin VIIa            | LLCETSLGVYK        | a                        |
| IP00215758        | Splice Isoform 6 Of Myosin VIIa            | LNANYPYK           | a                        |
| IP00215758        | Splice Isoform 6 Of Myosin VIIa            | YSGMMETHRIRR       | a                        |
| IP00163607        | Splice Isoform 6 Of Partitioning-defective | DYAEIQDFHR         | a                        |
| IP00163607        | Splice Isoform 6 Of Partitioning-defective | GLGDMFR            | a                        |
| IP00163607        | Splice Isoform 6 Of Partitioning-defective | GMHQLIVAR          | a                        |
| IP00163607        | Splice Isoform 6 Of Partitioning-defective | NILPRGAIQDGR       | a                        |
| IP00163607        | Splice Isoform 6 Of Partitioning-defective | NNYYSKR            | a                        |
| IP00220510        | Splice Isoform 7 Of MAP/microtubule        | KSSTVPSNTASGGMTR   | a                        |
| IP00220510        | Splice Isoform 7 Of MAP/microtubule        | LPTFEYER           | a                        |
| IP00220510        | Splice Isoform 7 Of MAP/microtubule        | SSTVPSNTASGGMTR    | a                        |
| IP00220510        | Splice Isoform 7 Of MAP/microtubule        | VKLARHLTGTR        | a                        |
| IP00221009        | Splice Isoform 7 Of Transcription factor   | ALFGLDR            | a                        |
| IP00221009        | Splice Isoform 7 Of Transcription factor   | WFLLDVQAGSLQSR     | a                        |
| IP00218664        | Splice Isoform 8 Of Inositol               | ASFQTLQMMRSEK      | a                        |
| IP00218664        | Splice Isoform 8 Of Inositol               | DQLEASAATRKAFITFR  | a                        |
| IP00218664        | Splice Isoform 8 Of Inositol               | KNREPR             | a                        |
| IP00218664        | Splice Isoform 8 Of Inositol               | LESTMKLVTLNLSGQSEL | a                        |
| IP00412681        | Splice Isoform 9 Of Amyloid beta A4        | EVCSQEAETGPCRAMIS  | a                        |
| IP00412681        | Splice Isoform 9 Of Amyloid beta A4        | THPHVPIYR          | a                        |
| IP00412681        | Splice Isoform 9 Of Amyloid beta A4        | WSDSPSGTK          | a                        |
| IP00412681        | Splice Isoform 9 Of Amyloid beta A4        | WYFDVTEGK          | a                        |
| IP00026089        | Splicing factor 3B subunit 1               | EEREIR             | a                        |
| IP00026089        | Splicing factor 3B subunit 1               | GGDSIGETTPGASK     | a                        |
| IP00026089        | Splicing factor 3B subunit 1               | GGDSIGETTPGASKRK   | a                        |
| IP00479395        | Splicing factor 3b, subunit 3, 130kDa      | ALWDRGLLNGASQK     | a                        |
| IP00479395        | Splicing factor 3b, subunit 3, 130kDa      | SRLAVGLVDNIVR      | a                        |
| IP00479395        | Splicing factor 3b, subunit 3, 130kDa      | VIVSDVQESHWVRYKR   | a                        |
| IP00010204        | Splicing factor, arginine/serine-rich 3    | NPPGFVFEFEDPR      | d                        |
| IP001171473       | Spondin 1 precursor                        | HRMIK              | a                        |
| IP00002525        | SPUF protein precursor                     | EFYGRGAPYNALTKG    | a                        |
| IP00165995        | SR rich protein                            | ATEDAEGGDGPR       | a                        |
| IP00165995        | SR rich protein                            | EYQMLLTK           | a                        |
| IP00165995        | SR rich protein                            | RKIDDQR            | a                        |
| IP00029601        | Src substrate cortactin                    | YGLFPANYVELR       | e                        |
| IP00479997        | Stathmin                                   | AIEENNNFSK         | d                        |
| IP00479997        | Stathmin                                   | ASGQAFELLSPR       | c; d; e; h               |
| IP00479997        | Stathmin                                   | DKHIEEVR           | d                        |
| IP00479997        | Stathmin                                   | EAQMAAK            | c; d; e                  |
| IP00479997        | Stathmin                                   | ESKDFADEAD         | d                        |
| IP00479997        | Stathmin                                   | MEANK              | d                        |
| IP00479997        | Stathmin                                   | SHEAEVLK           | c; d                     |
| IP00217052        | Steerin2 protein                           | GMTAQVGTMPR        | a                        |
| IP00217052        | Steerin2 protein                           | MQSEIEK            | a                        |
| IP00217052        | Steerin2 protein                           | NPSDVSXSDK         | a                        |
| IP00217052        | Steerin2 protein                           | SESQSGCSRAPSQVSI   | a                        |
| IP00217052        | Steerin2 protein                           | TPTANANSFGFK       | a                        |
| IP00217051        | Steerin3 protein                           | HSATSTMLTVK        | a                        |
| IP00217051        | Steerin3 protein                           | KNTQLR             | a                        |
| IP00217051        | Steerin3 protein                           | LFGAK              | a                        |
| IP00217051        | Steerin3 protein                           | LFLPCPMDVEGSR      | a                        |
| IP00217051        | Steerin3 protein                           | RSQSFNSDK          | a                        |
| IP00010390        | Sterile alpha motif domain containing      | DSGICINASNWQDK     | a                        |
| IP00020669        | Sterol O-acyltransferase 2                 | HCLPLQATFWGLVTPR   | a                        |
| IP00020669        | Sterol O-acyltransferase 2                 | HMEAVK             | a                        |
| IP00020669        | Sterol O-acyltransferase 2                 | MEPGGAR            | a                        |
| IP00418428        | Sterol regulatory element binding          | LCPLVEHLFR         | a                        |
| IP00418428        | Sterol regulatory element binding          | LMAGASPTR          | a                        |
| IP00418428        | Sterol regulatory element binding          | NVLGTESR           | a                        |
| IP00418428        | Sterol regulatory element binding          | VDASASARDAALVYHK   | a                        |
| IP00307433        | Steryl-sulfatase precursor                 | TIRTPNDR           | a                        |
| IP00307433        | Steryl-sulfatase precursor                 | WPRVIQAGQK         | a                        |
| IP00479946        | STIP1 protein                              | AMDVYQK            | c                        |
| IP00479946        | STIP1 protein                              | AYEDGCK            | d                        |
| IP00479946        | STIP1 protein                              | LMDVGLIAIR         | e                        |
| IP00334190        | Stomatin-like protein 2                    | APYVPTPDSLSSGSSR   | e                        |
| IP00007765        | Stress-70 protein, mitochondrial precursor | AQFEGIVTDLIR       | d; e                     |
| IP00007765        | Stress-70 protein, mitochondrial precursor | DAGQISGLNVLIR      | d; e                     |
| IP00007765        | Stress-70 protein, mitochondrial precursor | EGSGSGTGEQK        | c; d                     |
| IP00007765        | Stress-70 protein, mitochondrial precursor | ELLAR              | e                        |
| IP00007765        | Stress-70 protein, mitochondrial precursor | EMAGDNK            | c; d; e                  |
| IP00007765        | Stress-70 protein, mitochondrial precursor | LFEMAYK            | c; d; e                  |
| IP00007765        | Stress-70 protein, mitochondrial precursor | LLGQFTLIGIPPAPR    | d; e                     |
| IP00007765        | Stress-70 protein, mitochondrial precursor | LYSPSQIGAFVLMK     | d                        |
| IP00007765        | Stress-70 protein, mitochondrial precursor | NAVITVPAVENDSOR    | e                        |
| IP00007765        | Stress-70 protein, mitochondrial precursor | QAASSLQOASLAK      | e                        |



| IPI Accession No. | Protein Description                                                                | Peptide Sequence*           | Primary Source Dataset** |
|-------------------|------------------------------------------------------------------------------------|-----------------------------|--------------------------|
| IP10007765        | Stress-70 protein, mitochondrial precursor                                         | QAVTNPNNIFYATK              | d; e                     |
| IP10007765        | Stress-70 protein, mitochondrial precursor                                         | SDIGEVILVGGATR              | c; d; e                  |
| IP10007765        | Stress-70 protein, mitochondrial precursor                                         | SOVFSTAADGGQTQVEIK          | e                        |
| IP10007765        | Stress-70 protein, mitochondrial precursor                                         | STNGDFTLGGEDFDQALLR         | c; e                     |
| IP10007765        | Stress-70 protein, mitochondrial precursor                                         | TTPSVVAFADGER               | c; d                     |
| IP10007765        | Stress-70 protein, mitochondrial precursor                                         | VLENAEGAR                   | d; e                     |
| IP10007765        | Stress-70 protein, mitochondrial precursor                                         | VQQTVDLFR                   | c; d; e                  |
| IP10007765        | Stress-70 protein, mitochondrial precursor                                         | YDDPEVQK                    | d                        |
| IP100013894       | Stress-induced-phosphoprotein 1                                                    | ALSVGNDDALQCYSEAIK          | d                        |
| IP100013894       | Stress-induced-phosphoprotein 1                                                    | DAIHFYNK                    | d                        |
| IP100013894       | Stress-induced-phosphoprotein 1                                                    | EAADGYQR                    | c; d                     |
| IP100013894       | Stress-induced-phosphoprotein 1                                                    | MEQVNELK                    | d                        |
| IP100465078       | Striated muscle preferentially expressed                                           | EPGWAATGLR                  | a                        |
| IP100465078       | Striated muscle preferentially expressed                                           | GSPVLAMR                    | a                        |
| IP100465078       | Striated muscle preferentially expressed                                           | HLGVEPLVRASR                | a                        |
| IP100465078       | Striated muscle preferentially expressed                                           | QRSPADLELR                  | a                        |
| IP100465078       | Striated muscle preferentially expressed                                           | RPERSRSVQDLR                | a                        |
| IP100465078       | Striated muscle preferentially expressed                                           | SHESLR                      | a                        |
| IP100291939       | Structural maintenance of chromosome                                               | ALQYACGNALVCDNVED           | a                        |
| IP100291939       | Structural maintenance of chromosome                                               | EAKQEK                      | a                        |
| IP100291939       | Structural maintenance of chromosome                                               | KEAELR                      | a                        |
| IP100291939       | Structural maintenance of chromosome                                               | LEFENQK                     | a                        |
| IP100291939       | Structural maintenance of chromosome                                               | QEFERMEEESQSGR              | a                        |
| IP100305166       | Succinate dehydrogenase [ubiquinone] flavoprotein subunit, mitochondrial precursor | AFGGQSLK                    | d                        |
| IP100305166       | Succinate dehydrogenase [ubiquinone] flavoprotein subunit, mitochondrial precursor | IDEYDYKPGQQQK               | d; e                     |
| IP100305166       | Succinate dehydrogenase [ubiquinone] flavoprotein subunit, mitochondrial precursor | LGANSLDLVVFGR               | d; e                     |
| IP100294911       | Succinate dehydrogenase [ubiquinone] iron-sulfur protein, mitochondrial precursor  | DDFTEER                     | e                        |
| IP100294911       | Succinate dehydrogenase [ubiquinone] iron-sulfur protein, mitochondrial precursor  | DLVPDLSNFYAQYK              | e                        |
| IP100294911       | Succinate dehydrogenase [ubiquinone] iron-sulfur protein, mitochondrial precursor  | LQDFLSLYR                   | e                        |
| IP100294911       | Succinate dehydrogenase [ubiquinone] iron-sulfur protein, mitochondrial precursor  | QQYLQSEER                   | e                        |
| IP100294911       | Succinate dehydrogenase [ubiquinone] iron-sulfur protein, mitochondrial precursor  | YLGPAVLMQAYR                | e                        |
| IP100759493       | Succinyl-CoA ligase (GDP-forming) alpha-chain, mitochondrial precursor             | IICQGFQK                    | e                        |
| IP100026516       | Succinyl-CoA:3-ketoacid-coenzyme A transferase 1, mitochondrial precursor          | AGGAGVPFAYPTTGYGTLVQEGGSPK  | e                        |
| IP100026516       | Succinyl-CoA:3-ketoacid-coenzyme A transferase 1, mitochondrial precursor          | ETVTILPGASFSSDESAMIR        | d                        |
| IP100026516       | Succinyl-CoA:3-ketoacid-coenzyme A transferase 1, mitochondrial precursor          | FYTDPEVAVK                  | d                        |
| IP100026516       | Succinyl-CoA:3-ketoacid-coenzyme A transferase 1, mitochondrial precursor          | GLTAVSNAGVDFNGLGLLLR        | d; e                     |
| IP100026516       | Succinyl-CoA:3-ketoacid-coenzyme A transferase 1, mitochondrial precursor          | LMPMQQIAN                   | c; d; e                  |
| IP100026516       | Succinyl-CoA:3-ketoacid-coenzyme A transferase 1, mitochondrial precursor          | MYSSYVGENAEFER              | e                        |
| IP100026516       | Succinyl-CoA:3-ketoacid-coenzyme A transferase 1, mitochondrial precursor          | QYLSGELEVELTPQGLAER         | d; e                     |
| IP100026516       | Succinyl-CoA:3-ketoacid-coenzyme A transferase 1, mitochondrial precursor          | YVVTMEHSK                   | d                        |
| IP100026516       | Succinyl-CoA:3-ketoacid-coenzyme A transferase 1, mitochondrial precursor          | YGLANWMIQK                  | e                        |
| IP100384856       | SulfataSe 2 isoform b precursor                                                    | TFAYLVNSTGYRTAFFGK          | a                        |
| IP100384856       | SulfataSe 2 isoform b precursor                                                    | VDAQEENFLPK                 | a                        |
| IP100218733       | Superoxide dismutase                                                               | ADDLGK                      | c; d                     |
| IP100218733       | Superoxide dismutase                                                               | ADDLGKGGNEESTK              | d                        |
| IP100218733       | Superoxide dismutase                                                               | AVCYLK                      | d                        |
| IP100218733       | Superoxide dismutase                                                               | GGNEESTK                    | c; d                     |
| IP100218733       | Superoxide dismutase                                                               | HGGPKDEER                   | d                        |
| IP100218733       | Superoxide dismutase                                                               | HWGDLGNVTADK                | d                        |
| IP100218733       | Superoxide dismutase                                                               | LACGVIGIAQ                  | c; d; e                  |
| IP100218733       | Superoxide dismutase                                                               | TLVVHEK                     | d                        |
| IP100218733       | Superoxide dismutase                                                               | VVGSIK                      | c; d                     |
| IP100022314       | Superoxide dismutase [Mn], mitochondrial precursor                                 | GDVTAQIALQPAK               | d                        |
| IP100218733       | Superoxide dismutase [Mn], soluble                                                 | GDGPVQGINFEQK               | a; d; e                  |
| IP100166132       | Suppressor of actin mutations 2-like,                                              | NIAAKRDVYALDR               | a                        |
| IP100166132       | Suppressor of actin mutations 2-like,                                              | SSVESLSQDVMR                | a                        |
| IP100166132       | Suppressor of actin mutations 2-like,                                              | VAAEFSSR                    | a                        |
| IP100013441       | Suppressor of variegation 4-20 homolog 2                                           | APVLSITHAAVSLHR             | a                        |
| IP100013441       | Suppressor of variegation 4-20 homolog 2                                           | FVPADGNAACVYLR              | a                        |
| IP100013441       | Suppressor of variegation 4-20 homolog 2                                           | LQQGLDSGSRQGLGPR            | a                        |
| IP100216046       | SWL5NF-related matrix-associated                                                   | IKNEK                       | a                        |
| IP100216046       | SWL5NF-related matrix-associated                                                   | NIPGPHMVLVVK                | a                        |
| IP100023344       | Symplekin                                                                          | ILRAEKAVACSGAAQVR           | a                        |
| IP100023344       | Symplekin                                                                          | LGGFVMNLSR                  | a                        |
| IP100746370       | Synapsin II isoform IIb variant (Fragment)                                         | RPPASAPAPQAPTPSVGSSFFSLQAVK | e                        |
| IP100298984       | Synapsin-3                                                                         | GTPSEDAK                    | e                        |
| IP100298984       | Synapsin-3                                                                         | LSPQGGQLSPQSGSPQQQR         | d; e                     |
| IP100298984       | Synapsin-3                                                                         | QAQSPQQR                    | e                        |
| IP100298984       | Synapsin-3                                                                         | SGSPSQQR                    | d                        |
| IP100006631       | Synaptic vesicle glycoprotein 2B                                                   | GQTDLMAER                   | e                        |
| IP100006631       | Synaptic vesicle glycoprotein 2B                                                   | VFTVSNK                     | d; e                     |
| IP100006631       | Synaptic vesicle glycoprotein 2B                                                   | YFQDEEYK                    | d                        |
| IP100006631       | Synaptic vesicle glycoprotein 2B                                                   | YQDNYGGYAPSDGYR             | d; e                     |
| IP100013947       | Synaptogyrin-3                                                                     | AGAALDPVSFAR                | e                        |
| IP100013947       | Synaptogyrin-3                                                                     | GYQVPAY                     | c; d                     |
| IP100013947       | Synaptogyrin-3                                                                     | TAPGPATTOAGDAAR             | c; d; e                  |
| IP100027770       | Synaptophysin                                                                      | APPGAPEK                    | c; d                     |
| IP100027770       | Synaptophysin                                                                      | EPLGFVK                     | d                        |
| IP100027770       | Synaptophysin                                                                      | ETGWAAPFLR                  | e                        |
| IP100027770       | Synaptophysin                                                                      | MATDPENIK                   | d                        |
| IP100027770       | Synaptophysin                                                                      | QTGNTCK                     | d                        |
| IP100047169       | Synaptoporin                                                                       | GLSDVK                      | d                        |
| IP100009439       | Synaptotagmin-1                                                                    | HDIIGEFK                    | d                        |
| IP100009439       | Synaptotagmin-1                                                                    | KFETK                       | d                        |
| IP100009439       | Synaptotagmin-1                                                                    | LGDIKFLR                    | c; d; e                  |
| IP100009439       | Synaptotagmin-1                                                                    | MDVGGSLDPYVK                | d; e                     |
| IP100009439       | Synaptotagmin-1                                                                    | NLNPYVNESFSFVPEQIQK         | e                        |
| IP100009439       | Synaptotagmin-1                                                                    | TLNPFVEQFTFK                | d; e                     |
| IP100009439       | Synaptotagmin-1                                                                    | TLVMAVYDFDR                 | d                        |
| IP100009439       | Synaptotagmin-1                                                                    | VFLLPDK                     | d; e                     |
| IP100009439       | Synaptotagmin-1                                                                    | VFLLPDK                     | d; e                     |
| IP100009439       | Synaptotagmin-1                                                                    | VFVGYNSTGAELR               | d                        |
| IP100009439       | Synaptotagmin-1                                                                    | VMNTVDFGHVTEEWR             | d                        |
| IP100009439       | Synaptotagmin-1                                                                    | VPYSELGK                    | d                        |
| IP100009439       | Synaptotagmin-1                                                                    | YVPTAGK                     | d; e                     |
| IP100027875       | Synaptotagmin-11                                                                   | MTILPDK                     | a                        |
| IP100027875       | Synaptotagmin-11                                                                   | NLVDAAEAGLLSR               | a                        |

| IPI Accession No. | Protein Description                                          | Peptide Sequence*     | Primary Source Dataset** |
|-------------------|--------------------------------------------------------------|-----------------------|--------------------------|
| IP100219274       | Synaptotagmin-2                                              | TLVMAIYDFDR           | e                        |
| IP100657774       | Syntaxin 1B2 alternative isoform deltaTM                     | AIEQSEIQEQLNR         | c; d                     |
| IP100657774       | Syntaxin 1B2 alternative isoform deltaTM                     | DHFMEFFEQVEIIR        | d                        |
| IP100657774       | Syntaxin 1B2 alternative isoform deltaTM                     | DSDDSEEVVHVDR         | d                        |
| IP100657774       | Syntaxin 1B2 alternative isoform deltaTM                     | IEYNVEHSVDYVER        | d; e                     |
| IP100657774       | Syntaxin 1B2 alternative isoform deltaTM                     | LAIFTDIHK             | c; d                     |
| IP100657774       | Syntaxin 1B2 alternative isoform deltaTM                     | LSEDFEQVK             | d; e                     |
| IP100657774       | Syntaxin 1B2 alternative isoform deltaTM                     | QALNEIETR             | d                        |
| IP100657774       | Syntaxin 1B2 alternative isoform deltaTM                     | QHSAILAAPNDEK         | d; e                     |
| IP100657774       | Syntaxin 1B2 alternative isoform deltaTM                     | QLEITGR               | c; d; e                  |
| IP100657774       | Syntaxin 1B2 alternative isoform deltaTM                     | TKQELEDLTADIK         | d                        |
| IP100657774       | Syntaxin 1B2 alternative isoform deltaTM                     | TTTNEEEDMLSEK         | d; e                     |
| IP100301360       | TA p63 alpha                                                 | VIDAVR                | a                        |
| IP100007957       | TAF6-like RNA polymerase II                                  | AVLGDDPQLMK           | a                        |
| IP100007957       | TAF6-like RNA polymerase II                                  | FIAGR                 | a                        |
| IP100007957       | TAF6-like RNA polymerase II                                  | GAPRQQGPGTGRDVF       | a                        |
| IP100219299       | Talin 2                                                      | EVLQEWPLTVK           | a                        |
| IP100219299       | Talin 2                                                      | FLPTELK               | a                        |
| IP100219299       | Talin 2                                                      | MAAVESQLKPLPGETLEK    | a                        |
| IP100219299       | Talin 2                                                      | ITREQVDENETLLRR       | a                        |
| IP100219299       | Talin 2                                                      | TSSPEESIR             | a                        |
| IP100298994       | Talin-1                                                      | GAAAHDPSEEQQQR        | c                        |
| IP100298994       | Talin-1                                                      | MDESK                 | c                        |
| IP100219299       | Talin-2                                                      | GAAANPENEDQQQR        | e                        |
| IP100465168       | TAOK2 protein                                                | EWGLSPSDFGVR          | a                        |
| IP100465168       | TAOK2 protein                                                | GGFPGPPLRKGESR        | a                        |
| IP100465168       | TAOK2 protein                                                | QLGPPASR              | a                        |
| IP100023191       | Target of myb1                                               | LEDEFDMFALTR          | e                        |
| IP100023191       | Target of myb1                                               | LPNLSFSAEGTTPGPPSPAPR | e                        |
| IP100217437       | Tau-tubulin kinase                                           | NLADLR                | d                        |
| IP100164610       | TBC1 domain family member 1                                  | ENELIISFLRCLYEEK      | a                        |
| IP100164610       | TBC1 domain family member 1                                  | GSPGVSQRKLMR          | a                        |
| IP100011167       | TBC1 domain family member 10                                 | FDELDMSGDPK           | a                        |
| IP100011167       | TBC1 domain family member 10                                 | GGHGQQDLFRVLK         | a                        |
| IP100011167       | TBC1 domain family member 10                                 | GIPPSLR               | a                        |
| IP100011167       | TBC1 domain family member 10                                 | LRSLSPK               | a                        |
| IP100011167       | TBC1 domain family member 10                                 | YLPGYSEK              | a                        |
| IP100386607       | TBCD protein                                                 | DTVVRWSAAKIGR         | a                        |
| IP100386607       | TBCD protein                                                 | EVHGGGAEREVALERFR     | a                        |
| IP100000321       | T-box transcription factor TBX22                             | KGGESEER              | a                        |
| IP100024802       | TBP-associated factor 172                                    | DFVVMRAR              | a                        |
| IP100024802       | TBP-associated factor 172                                    | LENVK                 | a                        |
| IP100166036       | T-cell activation leucine repeat-rich                        | ITLTELK               | a                        |
| IP100166036       | T-cell activation leucine repeat-rich                        | NAQDK                 | a                        |
| IP100166033       | T-cell activation Rho GTPase activating                      | ESQLAGR               | a                        |
| IP100166033       | T-cell activation Rho GTPase activating                      | RDCLVR                | a                        |
| IP100747471       | T-cell lymphoma invasion and metastasis 1 variant (Fragment) | TLEDGVR               | d                        |
| IP100550591       | T-complex protein 1 isoform b                                | AHNEAQNPER            | d                        |
| IP100297779       | T-complex protein 1 subunit beta                             | VQDDEVGDGTSVTVLAELLR  | d                        |
| IP100302927       | T-complex protein 1 subunit delta                            | ALIAGGGAPFEIALLR      | d; e                     |
| IP100302927       | T-complex protein 1 subunit delta                            | SGATAAAGGR            | e                        |
| IP100010720       | T-complex protein 1 subunit epsilon                          | WYGGPEIELIAIATGGR     | d                        |
| IP100302925       | T-complex protein 1 subunit theta                            | DIDEVSSLLR            | e                        |
| IP100290770       | T-complex protein 1, gamma subunit                           | GISDLAQHYLMR          | a                        |
| IP100290770       | T-complex protein 1, gamma subunit                           | IVLLDSSLEYK           | a                        |
| IP100168908       | Telomerase reverse transcriptase                             | CRAVRSLLR             | a                        |
| IP100168908       | Telomerase reverse transcriptase                             | GDPAAFR               | a                        |
| IP100168908       | Telomerase reverse transcriptase                             | LTRHR                 | a                        |
| IP100003391       | Tenascin-M1                                                  | DSLLGIYGR             | a                        |
| IP100003391       | Tenascin-M1                                                  | EQNKGNVSFAFERR        | a                        |
| IP100003391       | Tenascin-M1                                                  | NHVLEIAR              | a                        |
| IP100003391       | Tenascin-M1                                                  | TQEWDPGK              | a                        |
| IP100003391       | Tenascin-M1                                                  | VELDTSNR              | a                        |
| IP100003391       | Tenascin-M1                                                  | YGTTVVEEKNHVLEIAR     | a                        |
| IP100160552       | Tenascin-R                                                   | GREESER               | a                        |
| IP100307545       | Tensin                                                       | EATSDPSR              | a                        |
| IP100307545       | Tensin                                                       | EKQPAEPPAPLRR         | a                        |
| IP100307545       | Tensin                                                       | ELDRLLSGFGLER         | a                        |
| IP100307545       | Tensin                                                       | HPAGVYQVSGLHMK        | a                        |
| IP100307545       | Tensin                                                       | SYVESVARTAVAGPR       | a                        |
| IP100658152       | tensin-like SH2 domain containing 1                          | VMIGSPK               | c                        |
| IP100057097       | Terminal deoxynucleotidyltransferase                         | DLAASDDYRGCLDLK       | a                        |
| IP100057097       | Terminal deoxynucleotidyltransferase                         | IYIK                  | a                        |
| IP100057097       | Terminal deoxynucleotidyltransferase                         | YAADPQDK              | a                        |
| IP100057097       | Terminal deoxynucleotidyltransferase                         | YMETLR                | a                        |
| IP100004450       | Testes specific heterogenous nuclear                         | DGYSSRDYR             | a                        |
| IP100004450       | Testes specific heterogenous nuclear                         | SDRYSR                | a                        |
| IP100005292       | Testican-1 precursor                                         | SLLGAFIPR             | a                        |
| IP100006128       | Testican-2 precursor                                         | EGETPGNFMEDQWLLS      | a                        |
| IP100006128       | Testican-2 precursor                                         | FRDEVEDDYIK           | a                        |
| IP100010369       | Testis protein TEX15                                         | KSDHPINEATISIENSK     | a                        |
| IP100010369       | Testis protein TEX15                                         | NQISEESCLNEK          | a                        |
| IP100010369       | Testis protein TEX15                                         | RAPKADISK             | a                        |
| IP100010369       | Testis protein TEX15                                         | SSTSTIK               | a                        |
| IP100181285       | Testis-specific chromodomain protein Y 2                     | DIVVK                 | c                        |
| IP100009028       | Tetranectin precursor                                        | GGTLSTPQTGSENDALY     | a                        |
| IP100009028       | Tetranectin precursor                                        | LDTLAQEVALLK          | a                        |
| IP100009028       | Tetranectin precursor                                        | MFEELK                | a                        |
| IP100009028       | Tetranectin precursor                                        | NWEITTAQPDGGK         | a                        |
| IP100009028       | Tetranectin precursor                                        | WFDK                  | a                        |
| IP100043402       | Tetratricopeptide repeat protein 14                          | HVDAMNEYNK            | a                        |
| IP100008522       | Tetrodotoxin-resistant voltage-gated                         | GFCLNEFTYLR           | a                        |
| IP100008522       | Tetrodotoxin-resistant voltage-gated                         | INQFFVAVFTGECVMKMF    | a                        |
| IP100008522       | Tetrodotoxin-resistant voltage-gated                         | MEFPGSLETNNFR         | a                        |
| IP100289815       | TGF-beta resistance-associated protein                       | KDKELLCPPVTR          | a                        |
| IP100289815       | TGF-beta resistance-associated protein                       | SSSQDEPGGLTSGSNY      | a                        |
| IP100289815       | TGF-beta resistance-associated protein                       | TAIDLGR               | a                        |

| IPI Accession No. | Protein Description                                | Peptide Sequence*   | Primary Source Dataset** |
|-------------------|----------------------------------------------------|---------------------|--------------------------|
| IP100289815       | TGF-beta resistance-associated protein             | TEVGRKLPASEGVGK     | a                        |
| IP100289815       | TGF-beta resistance-associated protein             | TQEDITVVALSVTLGK    | a                        |
| IP100020530       | Thioesterase superfamily member 2                  | LIAQGR              | c                        |
| IP10052768        | Thioredoxin                                        | LEATINELV           | d                        |
| IP10052768        | Thioredoxin                                        | TAFQEALDAAGDK       | c; d                     |
| IP10052768        | Thioredoxin                                        | VEEFSGANK           | c; d                     |
| IP100100247       | Thioredoxin domain-containing protein 13 precursor | SEANDQGGPPGDEGVTR   | d                        |
| IP100748461       | Thioredoxin reductase 1 (Fragment)                 | EAAQYVK             | d                        |
| IP100646689       | Thioredoxin-like protein 5                         | TIFAYFTGSK          | c                        |
| IP100646689       | Thioredoxin-like protein 5                         | YEEVSVSGFEETHR      | d                        |
| IP100328840       | THO complex subunit 4                              | GGGAQAAA            | e                        |
| IP100328840       | THO complex subunit 4                              | SLGTADVHFER         | d                        |
| IP100302837       | Threonine aspartase 1                              | LLCEGQK             | a                        |
| IP100302837       | Threonine aspartase 1                              | SLNFGAVGALSGIK      | a                        |
| IP100302837       | Threonine aspartase 1                              | TMEKGMSSGEGPLSR     | a                        |
| IP100019332       | THUMP domain containing protein 2                  | DDNQLKR             | a                        |
| IP100019332       | THUMP domain containing protein 2                  | VSLASRAYKTAGLR      | a                        |
| IP10055577        | Thy-1 cell surface antigen variant (Fragment)      | HVLFGTGVPEHTYR      | d                        |
| IP10055577        | Thy-1 cell surface antigen variant (Fragment)      | VLYLSAFTSK          | c; d; e                  |
| IP100022892       | Thy-1 membrane glycoprotein precursor              | YTSLTACLVDQSLR      | a; c; d; e; f            |
| IP100220827       | Thymosin beta-10                                   | ETIEQEK             | d                        |
| IP100220827       | Thymosin beta-10                                   | KTETQEK             | e                        |
| IP100220828       | Thymosin beta-4                                    | NPLPSK              | d                        |
| IP100220828       | Thymosin beta-4                                    | NPLPSKETIEQEK       | d                        |
| IP100220828       | Thymosin beta-4                                    | TETQEK              | d                        |
| IP100220827       | Thymosin, beta 10                                  | NLPTK               | a; d                     |
| IP100220828       | Thymosin, beta 4                                   | ETIEQEK             | a; c; d; e               |
| IP100003515       | Thyroid receptor interacting protein 11            | EEQEEELK            | a                        |
| IP100003515       | Thyroid receptor interacting protein 11            | HDLSKAETER          | a                        |
| IP100003515       | Thyroid receptor interacting protein 11            | IVETYR              | a                        |
| IP100003515       | Thyroid receptor interacting protein 11            | MENEK               | a                        |
| IP100003515       | Thyroid receptor interacting protein 11            | NIEQMDTDHK          | a                        |
| IP100003515       | Thyroid receptor interacting protein 11            | QIALODOLLK          | a                        |
| IP100003515       | Thyroid receptor interacting protein 11            | QMENTALQNEVQR       | a                        |
| IP100003515       | Thyroid receptor interacting protein 11            | QQNEGDSIISK         | a                        |
| IP100003515       | Thyroid receptor interacting protein 11            | QSDIMTEK            | a                        |
| IP100003515       | Thyroid receptor interacting protein 11            | QTBEK               | a                        |
| IP100003515       | Thyroid receptor interacting protein 11            | RDTNAPESFKDAESR     | a                        |
| IP100003515       | Thyroid receptor interacting protein 11            | SGRRDVENFLAPR       | a                        |
| IP100003515       | Thyroid receptor interacting protein 11            | TKIEIAIHAILRSENER   | a                        |
| IP100003515       | Thyroid receptor interacting protein 11            | AENSIGTASSKTVFR     | a                        |
| IP100179357       | Titin                                              | AEPANAGK            | a                        |
| IP100179357       | Titin                                              | DNREIRPGGNYK        | a                        |
| IP100179357       | Titin                                              | EPEPLEVLPGK         | a                        |
| IP100179357       | Titin                                              | EVTIMEEKER          | a                        |
| IP100179357       | Titin                                              | ISVTDTSILK          | a                        |
| IP100179357       | Titin                                              | KLSDTSTLIGDAVELR    | a                        |
| IP100179357       | Titin                                              | RVVTEEK             | a                        |
| IP100179357       | Titin                                              | YGTGPPKIKTFWANDR    | a                        |
| IP100375498       | TTin isoform novex-1                               | ADLGDWHK            | a                        |
| IP100375498       | TTin isoform novex-1                               | EPLGGKPSFIQLSSLR    | a                        |
| IP100455173       | Titin, heart isoform N2-B                          | AENIVGLGLPDTTPIECQ  | a                        |
| IP100455173       | Titin, heart isoform N2-B                          | AGDNK               | a                        |
| IP100455173       | Titin, heart isoform N2-B                          | AGKTAGPDCNFR        | a                        |
| IP100455173       | Titin, heart isoform N2-B                          | ALQAAVASEQPLGFSEW   | a                        |
| IP100455173       | Titin, heart isoform N2-B                          | ALRSEEEK            | a                        |
| IP100455173       | Titin, heart isoform N2-B                          | ATDSEVWHK           | a                        |
| IP100455173       | Titin, heart isoform N2-B                          | CENVNK              | a                        |
| IP100455173       | Titin, heart isoform N2-B                          | DATDLTRSPR          | a                        |
| IP100455173       | Titin, heart isoform N2-B                          | DATLQDMGTIVVMVGA    | a                        |
| IP100455173       | Titin, heart isoform N2-B                          | DCIRTDGGQYLK        | a                        |
| IP100455173       | Titin, heart isoform N2-B                          | DDGSKITINYVVERR     | a                        |
| IP100455173       | Titin, heart isoform N2-B                          | DEVELPRISMDPK       | a                        |
| IP100455173       | Titin, heart isoform N2-B                          | DGGGTEITNYIVEK      | a                        |
| IP100455173       | Titin, heart isoform N2-B                          | DTTTTVVDVVSATVAR    | a                        |
| IP100455173       | Titin, heart isoform N2-B                          | EEPELFDIDSEMR       | a                        |
| IP100455173       | Titin, heart isoform N2-B                          | EPVISAVEQTAQR       | a                        |
| IP100455173       | Titin, heart isoform N2-B                          | GDSCEVTGTIK         | a                        |
| IP100455173       | Titin, heart isoform N2-B                          | GIVVRAGGSAR         | a                        |
| IP100455173       | Titin, heart isoform N2-B                          | IDVTPVGSK           | a                        |
| IP100455173       | Titin, heart isoform N2-B                          | ITLRMR              | a                        |
| IP100455173       | Titin, heart isoform N2-B                          | KAEAVATVVAVDQAR     | a                        |
| IP100455173       | Titin, heart isoform N2-B                          | KELPEGR             | a                        |
| IP100455173       | Titin, heart isoform N2-B                          | KGQVLTSAR           | a                        |
| IP100455173       | Titin, heart isoform N2-B                          | KIEAHFDAR           | a                        |
| IP100455173       | Titin, heart isoform N2-B                          | KLEPSDK             | a                        |
| IP100455173       | Titin, heart isoform N2-B                          | KLIVIRAGCPIR        | a                        |
| IP100455173       | Titin, heart isoform N2-B                          | LEPSDKVYPR          | a                        |
| IP100455173       | Titin, heart isoform N2-B                          | LHDKTAVEK           | a                        |
| IP100455173       | Titin, heart isoform N2-B                          | MMMEITNVLGTSLSLFR   | a                        |
| IP100455173       | Titin, heart isoform N2-B                          | MSPARMSFGR          | a                        |
| IP100455173       | Titin, heart isoform N2-B                          | QCAFR               | a                        |
| IP100455173       | Titin, heart isoform N2-B                          | QFTVTK              | a                        |
| IP100455173       | Titin, heart isoform N2-B                          | QFVPMDDMK           | a                        |
| IP100455173       | Titin, heart isoform N2-B                          | QSGSAWKK            | a                        |
| IP100455173       | Titin, heart isoform N2-B                          | RSLSPTYIELMRPVSELIR | a                        |
| IP100455173       | Titin, heart isoform N2-B                          | SAALEEK             | a                        |
| IP100455173       | Titin, heart isoform N2-B                          | SAIPERRMK           | a                        |
| IP100455173       | Titin, heart isoform N2-B                          | SSTVSVK             | a                        |
| IP100455173       | Titin, heart isoform N2-B                          | TAFVNVRLVLDSPAPVNL  | a                        |
| IP100455173       | Titin, heart isoform N2-B                          | TARTSGMLTVLEEEAVFT  | a                        |
| IP100455173       | Titin, heart isoform N2-B                          | TDLGDWHK            | a                        |
| IP100455173       | Titin, heart isoform N2-B                          | TEHGVEASIASAIATLQ   | a                        |
| IP100455173       | Titin, heart isoform N2-B                          | VAEVPPGPK           | a                        |
| IP100455173       | Titin, heart isoform N2-B                          | VEAMGMSSEAK         | a                        |
| IP100455173       | Titin, heart isoform N2-B                          | VGDTLR              | a                        |
| IP100455173       | Titin, heart isoform N2-B                          | VLDPRGPPGPPVVISGVT  | a                        |

| IPI Accession No. | Protein Description                                        | Peptide Sequence*            | Primary Source Dataset** |
|-------------------|------------------------------------------------------------|------------------------------|--------------------------|
| IP00455173        | Titin, heart isoform N2-B                                  | VLDTSPPPVNLKVFETK            | a                        |
| IP00455173        | Titin, heart isoform N2-B                                  | VMKLTGEEYQFR                 | a                        |
| IP00455173        | Titin, heart isoform N2-B                                  | VSWYSKDK                     | a                        |
| IP00455173        | Titin, heart isoform N2-B                                  | VVIQDFPR                     | a                        |
| IP00455173        | Titin, heart isoform N2-B                                  | WEPPKYDGGSQVTNYIL            | a                        |
| IP00455173        | Titin, heart isoform N2-B                                  | WLEVINIFK                    | a                        |
| IP00455173        | Titin, heart isoform N2-B                                  | YILTVENSSGSKSAFVNV           | a                        |
| IP00011400        | T-lymphoma invasion and metastasis-inducing protein 1      | HASSGK                       | e                        |
| IP00062679        | TMEM30A protein                                            | NPPGGDNLEER                  | c                        |
| IP00008887        | Toll-like receptor 10 precursor                            | TSKILEMTNDGK                 | a                        |
| IP00019007        | Toll-like receptor 3 precursor                             | VLGFK                        | d                        |
| IP000477623       | Tolloid-like 2 protein                                     | BSSVEGTLASPNWPK              | a                        |
| IP000477623       | Tolloid-like 2 protein                                     | KPDPTVAGSSMFLR               | a                        |
| IP000477623       | Tolloid-like 2 protein                                     | LFHIDKAR                     | a                        |
| IP000477623       | Tolloid-like 2 protein                                     | VRRATTSR                     | a                        |
| IP00022970        | Tpr                                                        | AEIARNSASLTNNQLIQ            | a                        |
| IP00022970        | Tpr                                                        | AVEELHK                      | a                        |
| IP00022970        | Tpr                                                        | EENEELK                      | a                        |
| IP00022970        | Tpr                                                        | LLVALR                       | a                        |
| IP00022970        | Tpr                                                        | QAPRAPQSPR                   | a                        |
| IP000440542       | TPRT protein                                               | FAHYLEK                      | a                        |
| IP000440542       | TPRT protein                                               | HTVVK                        | a                        |
| IP000440542       | TPRT protein                                               | KTASLIANSCKAVFPR             | a                        |
| IP000440542       | TPRT protein                                               | SPGGSPGRAVPLGPSA             | a                        |
| IP000744692       | Transaldolase                                              | ALAGCDFLTISPK                | d                        |
| IP000744692       | Transaldolase                                              | IHLDEK                       | c                        |
| IP000744692       | Transaldolase                                              | KLGGSEQDIK                   | c                        |
| IP000744692       | Transaldolase                                              | WLHNEDQMAVEK                 | c                        |
| IP000257932       | Transcription elongation factor A protein-like 5           | DSQEDLQER                    | c                        |
| IP00018404        | Transcription elongation factor B                          | CLPPEAASDNHLK                | a                        |
| IP00018404        | Transcription elongation factor B                          | MQVYSGSKCAYLPK               | a                        |
| IP000247871       | Transcription elongation regulator 1                       | FKAIEK                       | a                        |
| IP000247871       | Transcription elongation regulator 1                       | GMEELK                       | a                        |
| IP000247871       | Transcription elongation regulator 1                       | KLRHPTPTMLSIQK               | a                        |
| IP000247871       | Transcription elongation regulator 1                       | MAQQQLR                      | a                        |
| IP000247871       | Transcription elongation regulator 1                       | YLVLDCVPEERR                 | a                        |
| IP000385712       | Transcription factor                                       | GISWVEVEAK                   | a                        |
| IP000170594       | Transcription factor ELYS                                  | AKSLAMSVTISGFSEFTP           | a                        |
| IP000170594       | Transcription factor ELYS                                  | ESVMREGR                     | a                        |
| IP000170594       | Transcription factor ELYS                                  | INVMNDRDPRLR                 | a                        |
| IP00003367        | Transcription factor NF-E2 45 kDa subunit                  | LETIVQLELER                  | a                        |
| IP00023591        | Transcriptional activator protein Pur-alpha                | DYLGDFIEHYAQLGPSQPPDLAQADEPR | d                        |
| IP00023591        | Transcriptional activator protein Pur-alpha                | FFFDVGSNK                    | d; e                     |
| IP00023591        | Transcriptional activator protein Pur-alpha                | FYLDVK                       | d                        |
| IP00023591        | Transcriptional activator protein Pur-alpha                | GPGLGSTGQQTALPAQGLIEFR       | d                        |
| IP00009101        | Transcriptional activator SRCAP                            | DVHIVLISER                   | a                        |
| IP00009101        | Transcriptional activator SRCAP                            | IDMGRFDLIGLEGR               | a                        |
| IP00009101        | Transcriptional activator SRCAP                            | LRLEAEGMRGR                  | a                        |
| IP00009101        | Transcriptional activator SRCAP                            | QFWSNVEK                     | a                        |
| IP00009101        | Transcriptional activator SRCAP                            | QQRLEEK                      | a                        |
| IP00009101        | Transcriptional activator SRCAP                            | WQSLNFNSQRR                  | a                        |
| IP00030404        | Transcriptional repressor NF-X1                            | EMVICSEASSTYQR               | a                        |
| IP00030404        | Transcriptional repressor NF-X1                            | EVHQAR                       | a                        |
| IP00027500        | Transforming protein RhoA precursor                        | EVFEMATR                     | d; e                     |
| IP00027500        | Transforming protein RhoA precursor                        | HFCPNVPHLVGNK                | d                        |
| IP00027500        | Transforming protein RhoA precursor                        | QEPVKPEEGR                   | d                        |
| IP00027500        | Transforming protein RhoA precursor                        | TCLLIVFSK                    | b; d                     |
| IP00290032        | Transient receptor potential cation                        | ATEGDNTEFGAFVGRH             | a                        |
| IP00290032        | Transient receptor potential cation                        | QLLGK                        | a                        |
| IP000643920       | Transketolase                                              | AVELAANTK                    | c                        |
| IP000643920       | Transketolase                                              | AVGQALAK                     | d                        |
| IP000643920       | Transketolase                                              | DAIAQAVR                     | d; e                     |
| IP000643920       | Transketolase                                              | IHALDGDTK                    | c; d                     |
| IP000643920       | Transketolase                                              | ILATPPQEDAPSVDIANIR          | c; d; e                  |
| IP000643920       | Transketolase                                              | LDNLVAILDINR                 | d                        |
| IP000643920       | Transketolase                                              | MFGIDR                       | c                        |
| IP000643920       | Transketolase                                              | SVPISTVIFYSDGVATEK           | d                        |
| IP000643920       | Transketolase                                              | VLDPFTKPLDR                  | c                        |
| IP00005039        | Translation initiation factor IF-2                         | DDISIVK                      | a                        |
| IP00005039        | Translation initiation factor IF-2                         | EAHQKAR                      | a                        |
| IP00005039        | Translation initiation factor IF-2                         | YVEVWIGMTIEELARAME           | a                        |
| IP00465377        | Transmembrane anchor protein 1                             | EELEEQR                      | d                        |
| IP00397645        | transmembrane anchor protein 1 isoform 3                   | GAAASPEPAR                   | c                        |
| IP00028055        | Transmembrane emp24 domain-containing protein 10 precursor | DLLVTGAYEISDQSGGAGGLR        | d                        |
| IP00748552        | transmembrane protein 10 isoform b                         | GLWWLVPR                     | d; e                     |
| IP00012855        | Transmembrane protein 11                                   | YIVIEPTR                     | e                        |
| IP000101026       | Transporter 1, ATP-binding cassette                        | AELLASAGSACSWDPEPR           | a                        |
| IP000101026       | Transporter 1, ATP-binding cassette                        | DRDQVR                       | a                        |
| IP000101026       | Transporter 1, ATP-binding cassette                        | SSQVAIEALSAMPTVR             | a                        |
| IP000101026       | Transporter 1, ATP-binding cassette                        | VPMASSRCFAPRGR               | a                        |
| IP000855916       | Transthyretin                                              | TSENGELHGLTTEEFVEGIYK        | g                        |
| IP000855916       | Transthyretin                                              | ESGELHGLTTEEFVEGIYK          | g                        |
| IP000855916       | Transthyretin                                              | ALGISPFHEHAEVFTANDSGPR       | g                        |
| IP000855916       | Transthyretin                                              | SESGELHGLTTEEFVEGIYK         | g                        |
| IP00022432        | Transthyretin precursor                                    | CPLMYK                       | a                        |
| IP00022432        | Transthyretin precursor                                    | GSPAINVAHVFR                 | a; g                     |
| IP00022432        | Transthyretin precursor                                    | SYWK                         | a                        |
| IP00022432        | Transthyretin precursor                                    | TSENGELHGLTTEEFVE            | a                        |
| IP00022432        | Transthyretin precursor                                    | VLDQVR                       | a                        |
| IP00022432        | Transthyretin precursor                                    | YTHAALLSPYSYSTAVVT           | a                        |
| IP000479801       | Trichohyalin                                               | EEEQLLQEREEOPLR              | a                        |
| IP00015869        | Trichohyalin                                               | FLQEEQQLR                    | a                        |
| IP00015869        | Trichohyalin                                               | FRLEEQK                      | a                        |
| IP00015869        | Trichohyalin                                               | GREEKQQR                     | a                        |
| IP00015869        | Trichohyalin                                               | QGREEQQLR                    | a                        |
| IP00015869        | Trichohyalin                                               | QRELOEEEEQLR                 | a                        |
| IP00015869        | Trichohyalin                                               | QRREK                        | a                        |

| IPI Accession No. | Protein Description                                                  | Peptide Sequence*          | Primary Source Dataset** |
|-------------------|----------------------------------------------------------------------|----------------------------|--------------------------|
| IP100031522       | Trifunctional enzyme alpha subunit, mitochondrial precursor          | FVDLYGAQK                  | d                        |
| IP100031522       | Trifunctional enzyme alpha subunit, mitochondrial precursor          | GFVYIQEGVK                 | d                        |
| IP100031522       | Trifunctional enzyme alpha subunit, mitochondrial precursor          | GQQQVEK                    | c; e                     |
| IP100031522       | Trifunctional enzyme alpha subunit, mitochondrial precursor          | MVGVPAALDMLTGR             | d; e                     |
| IP100031522       | Trifunctional enzyme alpha subunit, mitochondrial precursor          | TVLGTPEVLLGALPGAGGTQR      | d; e                     |
| IP100022793       | Trifunctional enzyme beta subunit, mitochondrial precursor           | AMDSDFEAENYMGK             | e                        |
| IP100022793       | Trifunctional enzyme beta subunit, mitochondrial precursor           | DLMPHDLAR                  | c; d                     |
| IP100022793       | Trifunctional enzyme beta subunit, mitochondrial precursor           | LEQDEYALR                  | c; e                     |
| IP100465028       | Triosephosphate isomerase                                            | DCGATWVVLGHSEK             | c; d                     |
| IP100465028       | Triosephosphate isomerase                                            | FFVGGNWK                   | d; e                     |
| IP100465028       | Triosephosphate isomerase                                            | HVFGESDELIGQK              | d; f                     |
| IP100465028       | Triosephosphate isomerase                                            | IAVAAQNCYK                 | d                        |
| IP100465028       | Triosephosphate isomerase                                            | IYGGSVTGATCK               | c; d; e                  |
| IP100465028       | Triosephosphate isomerase                                            | QKLDPK                     | d                        |
| IP100465028       | Triosephosphate isomerase                                            | QSLGELIGTLNAAK             | d                        |
| IP100465028       | Triosephosphate isomerase                                            | SNVSDAVAQSTR               | c; d; e                  |
| IP100465028       | Triosephosphate isomerase                                            | TATPQQAQEVHEK              | c; d                     |
| IP100465028       | Triosephosphate isomerase                                            | VIADNVK                    | c; d                     |
| IP100465028       | Triosephosphate isomerase                                            | VPADTEVVCAPPTAYIDFAR       | d; e                     |
| IP100465028       | Triosephosphate isomerase                                            | VYFEQTK                    | c; d; e                  |
| IP100465028       | Triosephosphate isomerase                                            | VYLAPEVYVAIGTGR            | d; e                     |
| IP100006207       | TRIP protein                                                         | CEMSEHPSQTVR               | a                        |
| IP100006207       | TRIP protein                                                         | EILHNTEK                   | a                        |
| IP100006207       | TRIP protein                                                         | EIRMKELER                  | a                        |
| IP100006207       | TRIP protein                                                         | RQYEEKNK                   | a                        |
| IP100006207       | TRIP protein                                                         | STGDGTLGRASEVEVK           | a                        |
| IP100006207       | TRIP protein                                                         | TNFMVQVDILK                | a                        |
| IP100153011       | Tripartite motif protein 2                                           | ENPIEDDLIFR                | d                        |
| IP100153011       | Tripartite motif protein 2                                           | LMGPK                      | d                        |
| IP100153011       | Tripartite motif protein 2                                           | LNELADQDFLHPR              | d                        |
| IP100153011       | Tripartite motif protein 2                                           | WYSIFSSDGK                 | d                        |
| IP100218013       | Triptin                                                              | KTEHSGMNHMYEDNDKD          | a                        |
| IP100218013       | Triptin                                                              | NVIK                       | a                        |
| IP100218013       | Triptin                                                              | WEKPSPSNVYTER              | a                        |
| IP100657953       | Triple functional domain                                             | APEQQVK                    | e                        |
| IP100657953       | Triple functional domain                                             | DLADIAAFFR                 | e                        |
| IP100657953       | Triple functional domain                                             | DSDDSAATPQDETVVEER         | e                        |
| IP100297452       | TRK-fused gene/anaplastic large cell lymphoma kinase extra long form | NVMSAFGLTDDQVGGPPSAPAEDR   | d                        |
| IP100005089       | Tropomodulin-2                                                       | ANDPSLQEVNLSNKK            | e                        |
| IP100005089       | Tropomodulin-2                                                       | EHLIMYLEK                  | d                        |
| IP100005089       | Tropomodulin-2                                                       | FGYQFTK                    | d                        |
| IP100005089       | Tropomodulin-2                                                       | NIPITLR                    | d                        |
| IP100005089       | Tropomodulin-2                                                       | QLENVLDLDPESAMLPAGFR       | d                        |
| IP100005089       | Tropomodulin-2                                                       | QQLGTAVEMEAQMLEENSR        | d                        |
| IP100005089       | Tropomodulin-2                                                       | SNDPVALAFADMLK             | d                        |
| IP100384369       | Tropomyosin 1 alpha variant 6                                        | AQKDEEK                    | c; d                     |
| IP100384369       | Tropomyosin 1 alpha variant 6                                        | EDRVEEIK                   | d                        |
| IP100384369       | Tropomyosin 1 alpha variant 6                                        | ETAADVASLNR                | d; e                     |
| IP100384369       | Tropomyosin 1 alpha variant 6                                        | LEEAEK                     | c                        |
| IP100384369       | Tropomyosin 1 alpha variant 6                                        | LVIHSDLER                  | e                        |
| IP100384369       | Tropomyosin 1 alpha variant 6                                        | SIDDLQQLYQLEQNR            | c; d; e                  |
| IP100384369       | Tropomyosin 1 alpha variant 6                                        | SLOEQADAAEER               | c; d; e                  |
| IP100479185       | Tropomyosin 3                                                        | AFAER                      | c; d                     |
| IP100479185       | Tropomyosin 3                                                        | EDKVEEIK                   | d                        |
| IP100479185       | Tropomyosin 3                                                        | EQAAEAVASLNR               | d; e                     |
| IP100479185       | Tropomyosin 3                                                        | IQLVEELDR                  | d; e                     |
| IP100479185       | Tropomyosin 3                                                        | IQVLQQADDAEER              | d; e                     |
| IP100479185       | Tropomyosin 3                                                        | KIQVLQQADDAEER             | c; d                     |
| IP100479185       | Tropomyosin 3                                                        | KYEEVAR                    | c; d                     |
| IP100479185       | Tropomyosin 3                                                        | LVHGGDLER                  | d                        |
| IP100479185       | Tropomyosin 3                                                        | MELQEIQLK                  | d; e                     |
| IP100477649       | Tropomyosin 3                                                        | NVTNNLK                    | c                        |
| IP100479185       | Tropomyosin 3                                                        | SLEAQAEK                   | c; d; e                  |
| IP100010779       | Tropomyosin 4                                                        | AQGLQR                     | c                        |
| IP100010779       | Tropomyosin 4                                                        | IQALQQQDAEADR              | d                        |
| IP100183968       | Tropomyosin alpha 3 chain                                            | ALKDEEK                    | c; d                     |
| IP100145107       | Troponin T2, cardiac, isoform 3                                      | ALSNMHHFGYIQKTER           | a                        |
| IP100145107       | Troponin T2, cardiac, isoform 3                                      | DRIERR                     | a                        |
| IP100145107       | Troponin T2, cardiac, isoform 3                                      | EEEEVSLK                   | a                        |
| IP100145107       | Troponin T2, cardiac, isoform 3                                      | KADEAR                     | a                        |
| IP100145107       | Troponin T2, cardiac, isoform 3                                      | RKVLAIHLDNEDQLR            | a                        |
| IP100011694       | Trypsin-1 precursor                                                  | NKPGVYTK                   | e                        |
| IP100011695       | Trypsin-2 precursor                                                  | LGHNIEVLEGNQFNAAK          | d                        |
| IP100000171       | TSC2-related inducible leucine zipper                                | IEQAMDLVK                  | a                        |
| IP100176427       | TSLC1-like 2                                                         | QTQYVLDVQYSPTAR            | c; e                     |
| IP100027107       | Tu translation elongation factor, mitochondrial                      | AEAGDNLGALVR               | e                        |
| IP100027107       | Tu translation elongation factor, mitochondrial                      | DLEKPFLLPVEAVYVPGR         | d; e                     |
| IP100027107       | Tu translation elongation factor, mitochondrial                      | ELLTEFGYK                  | d                        |
| IP100027107       | Tu translation elongation factor, mitochondrial                      | ELLTEFGYKGETPVVIGSALCALEGR | b                        |
| IP100027107       | Tu translation elongation factor, mitochondrial                      | FNILIR                     | d                        |
| IP100027107       | Tu translation elongation factor, mitochondrial                      | GTVVVTGLTER                | e                        |
| IP100027107       | Tu translation elongation factor, mitochondrial                      | KYEEIDNAPEER               | c; d                     |
| IP100027107       | Tu translation elongation factor, mitochondrial                      | LLDAVDYIYIPPAR             | d; e                     |
| IP100027107       | Tu translation elongation factor, mitochondrial                      | VEAQVYILSK                 | d                        |
| IP100027107       | Tu translation elongation factor, mitochondrial                      | YEEIDNAPEER                | c; d; e                  |
| IP100642386       | TU12B1-TY                                                            | SFFNAQFGLSR                | d                        |
| IP100010895       | Tubby related protein 2                                              | FLLAGR                     | a                        |
| IP100010895       | Tubby related protein 2                                              | LFEK                       | a                        |
| IP100010895       | Tubby related protein 2                                              | SCLREER                    | a                        |
| IP100007750       | Tubulin alpha-1 chain                                                | AVFVLDLPTVIDEIR            | c; d; e                  |
| IP100007750       | Tubulin alpha-1 chain                                                | EIDPVLDR                   | c; d; e                  |
| IP100007750       | Tubulin alpha-1 chain                                                | TIGGGDSFTTFFCETGAGK        | d; e                     |
| IP100180675       | Tubulin alpha-3 chain                                                | AVCMLSNTTAAEAWAR           | b; c; d; e               |
| IP100180675       | Tubulin alpha-3 chain                                                | FDGALNVLDLTFEQTNLVPYPR     | d; e                     |
| IP100180675       | Tubulin alpha-3 chain                                                | LIGQIVSSITASLR             | d; e                     |
| IP100180675       | Tubulin alpha-3 chain                                                | LSVDYVK                    | c; d                     |
| IP100180675       | Tubulin alpha-3 chain                                                | QLFHPEQLITGK               | c; d; e; f; g            |

| IPI Accession No. | Protein Description                       | Peptide Sequence*          | Primary Source Dataset** |
|-------------------|-------------------------------------------|----------------------------|--------------------------|
| IPI00180675       | Tubulin alpha-3 chain                     | VGINYQPTTVVGGDLAK          | c; d                     |
| IPI00218343       | Tubulin alpha-6 chain                     | AVFVDELTIVDEVR             | c; d; e; f; g            |
| IPI00218343       | Tubulin alpha-6 chain                     | DVNAAIATIK                 | c; d; e                  |
| IPI00218343       | Tubulin alpha-6 chain                     | EIDLVDR                    | c; d; e; f               |
| IPI00218343       | Tubulin alpha-6 chain                     | IHFPLATYAPVISAEEK          | c; d; e                  |
| IPI00218343       | Tubulin alpha-6 chain                     | LDHKFDLMYAK                | f; e                     |
| IPI00218343       | Tubulin alpha-6 chain                     | NLDERPTYNLNR               | c; d; e; f; g            |
| IPI00218343       | Tubulin alpha-6 chain                     | TIQFVDCPTGFEK              | b; c; d; e; f; g         |
| IPI00387144       | Tubulin alpha-ubiquitous chain            | AFVHWYVYVGGEMEEGFSEAR      | d; e; f                  |
| IPI00387144       | Tubulin alpha-ubiquitous chain            | AVHEQLSVAETINACFEPANQMVK   | d; e                     |
| IPI00387144       | Tubulin alpha-ubiquitous chain            | DYEEVGVDSVEGEEGEEY         | e                        |
| IPI00387144       | Tubulin alpha-ubiquitous chain            | EDAANNYAR                  | c; d                     |
| IPI00387144       | Tubulin alpha-ubiquitous chain            | EDMAALEK                   | d; e                     |
| IPI00387144       | Tubulin alpha-ubiquitous chain            | FDLMYAK                    | c; d; e                  |
| IPI00387144       | Tubulin alpha-ubiquitous chain            | GDVYVK                     | d                        |
| IPI00387144       | Tubulin alpha-ubiquitous chain            | GHYTIK                     | d; f                     |
| IPI00387144       | Tubulin alpha-ubiquitous chain            | LISQVSSITASLR              | d; e                     |
| IPI00387144       | Tubulin alpha-ubiquitous chain            | QLSDYGGK                   | d                        |
| IPI00387144       | Tubulin alpha-ubiquitous chain            | QLFHPQLITGKEDAANNYAR       | d                        |
| IPI00387144       | Tubulin alpha-ubiquitous chain            | SIQFVDCPTGFEK              | c; d; e; f; g            |
| IPI00387144       | Tubulin alpha-ubiquitous chain            | TIGGGDSFNTFSETGAGK         | c; d; f; g               |
| IPI00387144       | Tubulin alpha-ubiquitous chain            | YMACLLYR                   | d; e                     |
| IPI00011654       | Tubulin beta-2 chain                      | ALTVPELTQQVFDK             | d; e                     |
| IPI00011654       | Tubulin beta-2 chain                      | MAVTFIGNSTAIQELFK          | d                        |
| IPI00007752       | Tubulin beta-2C chain                     | ALTVPELTQQVFDK             | c; d; e                  |
| IPI00007752       | Tubulin beta-2C chain                     | AVLVLEPGTMDSVR             | c; d; e                  |
| IPI00007752       | Tubulin beta-2C chain                     | EIVHLQAGCGGNOIGAK          | c; d; e; f               |
| IPI00007752       | Tubulin beta-2C chain                     | EVDEQMLNVQNK               | c; d; e                  |
| IPI00007752       | Tubulin beta-2C chain                     | FWEIVSEHGDIDPTGYHGSDSLQLER | d; e                     |
| IPI00007752       | Tubulin beta-2C chain                     | GHYTEGAELVDSVLDVVR         | c; d; f                  |
| IPI00007752       | Tubulin beta-2C chain                     | GSQYR                      | c; d; e                  |
| IPI00007752       | Tubulin beta-2C chain                     | IMNTFSVSPSK                | c; d; e                  |
| IPI00007752       | Tubulin beta-2C chain                     | INVYNEATGGK                | c; d; e                  |
| IPI00007752       | Tubulin beta-2C chain                     | KLAVNMVFPFR                | c; d                     |
| IPI00007752       | Tubulin beta-2C chain                     | LHFMPGFAPLTSR              | c; d; e; f               |
| IPI00007752       | Tubulin beta-2C chain                     | NSSYFVEWIPNNVK             | c; d; e                  |
| IPI00007752       | Tubulin beta-2C chain                     | SGPFGQIFPDNFVFGQSGAGNNWAK  | d; e                     |
| IPI00007752       | Tubulin beta-2C chain                     | TAVCDIPPR                  | d; e                     |
| IPI00007752       | Tubulin beta-2C chain                     | YLTVAAVFR                  | d; e; f; g               |
| IPI00013683       | Tubulin beta-3 chain                      | EVDEQMLAIQSK               | d; e                     |
| IPI00013683       | Tubulin beta-3 chain                      | FWEIVSEHGDIDPSGNYVSDSLQLER | d; e                     |
| IPI00013683       | Tubulin beta-3 chain                      | ISVYNEASSHK                | c; d; e                  |
| IPI00013683       | Tubulin beta-3 chain                      | LATPTYGDLNHLVSATMSGVTTSLR  | d; e                     |
| IPI00013683       | Tubulin beta-3 chain                      | LHFMPGFAPLTSR              | e                        |
| IPI00013683       | Tubulin beta-3 chain                      | YAVCDIPPR                  | e                        |
| IPI00013683       | Tubulin beta-3 chain                      | YREEVDR                    | c                        |
| IPI00013683       | Tubulin beta-3 chain                      | YLTVATVFR                  | c; d; e                  |
| IPI00023598       | Tubulin beta-4 chain                      | EEFPDR                     | d; e                     |
| IPI00023598       | Tubulin beta-4 chain                      | EVDEQMLVSQSK               | c; d; e                  |
| IPI00023598       | Tubulin beta-4 chain                      | INVYNEATGGNYVPR            | c; d; e; f; g            |
| IPI00023598       | Tubulin beta-4 chain                      | IREFPDR                    | c; d                     |
| IPI00023598       | Tubulin beta-4 chain                      | LTTPTYGDLNHLVSATMSGVTTCLR  | d; e                     |
| IPI00023598       | Tubulin beta-4 chain                      | MAATFIGNSTAIQELFK          | d; e                     |
| IPI00013043       | Tubulin polymerization-promoting protein  | APISGVTK                   | c; d; e                  |
| IPI00013043       | Tubulin polymerization-promoting protein  | DCQVIDGR                   | c; d; e                  |
| IPI00013043       | Tubulin polymerization-promoting protein  | FAVHGDR                    | c; d                     |
| IPI00013043       | Tubulin polymerization-promoting protein  | FDPGK                      | d                        |
| IPI00013043       | Tubulin polymerization-promoting protein  | FTGSHK                     | d                        |
| IPI00013043       | Tubulin polymerization-promoting protein  | HAGTYDQK                   | c                        |
| IPI00013043       | Tubulin polymerization-promoting protein  | LIEGK                      | e                        |
| IPI00013043       | Tubulin polymerization-promoting protein  | LSLESEGAGGAAPELSALEAFR     | d; e                     |
| IPI00013043       | Tubulin polymerization-promoting protein  | LITDTK                     | d; e                     |
| IPI00013043       | Tubulin polymerization-promoting protein  | NVTVTDVIVFSK               | d                        |
| IPI00013043       | Tubulin polymerization-promoting protein  | SSEAVR                     | e                        |
| IPI00013043       | Tubulin polymerization-promoting protein  | TITFEQFQALEELAK            | d; e                     |
| IPI00013043       | Tubulin polymerization-promoting protein  | VDLVDESQVYSGYK             | c; d; e                  |
| IPI00645452       | Tubulin, beta polypeptide                 | ISVYNEATGGK                | c; d; e                  |
| IPI00031370       | Tubulin, beta polypeptide paralog         | INVYNEATGNK                | d                        |
| IPI00217236       | Tubulin-specific chaperone A              | AEDGENYDIKK                | c                        |
| IPI00293126       | Tubulin-specific chaperone B              | AQQEAAEQR                  | c; d; e                  |
| IPI00293126       | Tubulin-specific chaperone B              | YTIQEAAYDQR                | d; e                     |
| IPI00152007       | Tumor endothelial marker 4                | DVLVNIYSAYIDNFLNAKD        | a                        |
| IPI00152007       | Tumor endothelial marker 4                | FDAPRLDGSAGTR              | a                        |
| IPI00152007       | Tumor endothelial marker 4                | GASQATNR                   | a                        |
| IPI00152007       | Tumor endothelial marker 4                | MLVISGGDGYEDFR             | a                        |
| IPI00152007       | Tumor endothelial marker 4                | SSHQELRRDEGSQDOTG          | a                        |
| IPI00152007       | Tumor endothelial marker 4                | VGALLVQFSK                 | a                        |
| IPI00004413       | Tumor necrosis factor receptor            | DTVLRQVR                   | a                        |
| IPI00004413       | Tumor necrosis factor receptor            | HENGIEK                    | a                        |
| IPI00004413       | Tumor necrosis factor receptor            | IRGLMEDITQLETDK            | a                        |
| IPI00004413       | Tumor necrosis factor receptor            | KSMPTQNR                   | a                        |
| IPI00004413       | Tumor necrosis factor receptor            | LLPSMEATGGEK               | a                        |
| IPI00004413       | Tumor necrosis factor receptor            | LPCAALTR                   | a                        |
| IPI00437697       | twety 1 isoform 2                         | AVSNPFQQR                  | e                        |
| IPI00437697       | twety 1 isoform 2                         | TELTLEVELEPR               | d                        |
| IPI00328103       | Type I inner root sheath specific keratin | DAEAWFNEK                  | a                        |
| IPI00328103       | Type I inner root sheath specific keratin | LEYEQLLDIK                 | a                        |
| IPI00328103       | Type I inner root sheath specific keratin | TVVEIDPR                   | a                        |
| IPI00477770       | Type XV collagen                          | AFLSSHLQDLSTIVR            | a                        |
| IPI00477770       | Type XV collagen                          | GDINGSFLMSGPPPLPG          | a                        |
| IPI00477770       | Type XV collagen                          | WITPAQR                    | a                        |
| IPI00385887       | Tyrosine kinase                           | ELLEEVGQNGSR               | a                        |
| IPI00385887       | Tyrosine kinase                           | IAAVTK                     | a                        |
| IPI00385887       | Tyrosine kinase                           | NQADVIYVNTQLESEGL          | a                        |
| IPI00385887       | Tyrosine kinase                           | TGPTFSVLR                  | a                        |
| IPI00004566       | Tyrosine-protein kinase ITK/TSK           | DLAARNCLVGENQVIK           | a                        |
| IPI00004566       | Tyrosine-protein kinase ITK/TSK           | KPLPPTPEDNR                | a                        |

| IPI Accession No. | Protein Description                                                              | Peptide Sequence*              | Primary Source Dataset** |
|-------------------|----------------------------------------------------------------------------------|--------------------------------|--------------------------|
| IP100011633       | Tyrosine-protein kinase JAK1                                                     | ELADLMTR                       | a                        |
| IP100011633       | Tyrosine-protein kinase JAK1                                                     | LRQEGSEGMVYLR                  | a                        |
| IP100011633       | Tyrosine-protein kinase JAK1                                                     | MSLRLLHYMR                     | a                        |
| IP100011633       | Tyrosine-protein kinase JAK1                                                     | NQPTVEVDFHFEKR                 | a                        |
| IP100011633       | Tyrosine-protein kinase JAK1                                                     | QILRTDNISFMLKR                 | a                        |
| IP100011633       | Tyrosine-protein kinase JAK1                                                     | TLIEK                          | a                        |
| IP100420014       | U5 small nuclear ribonucleoprotein 200                                           | KLPEEVVK                       | a                        |
| IP100420014       | U5 small nuclear ribonucleoprotein 200                                           | LTADILITCAADIQR                | a                        |
| IP100420014       | U5 small nuclear ribonucleoprotein 200                                           | RDEPTGTEVLSLVGKLEGT            | a                        |
| IP100420014       | U5 small nuclear ribonucleoprotein 200                                           | WTELGALDILQMLGR                | a                        |
| IP100006725       | U5 snRNP 100 kD protein                                                          | DSSLPHLIEVDKCGYK               | a                        |
| IP100006725       | U5 snRNP 100 kD protein                                                          | ERHQVQLLGR                     | a                        |
| IP100006725       | U5 snRNP 100 kD protein                                                          | HKERER                         | a                        |
| IP100006725       | U5 snRNP 100 kD protein                                                          | QFQDLGRKMLEDPQER               | a                        |
| IP100099834       | Ubimuclein                                                                       | ELLCCVVKIKLESQDLER             | a                        |
| IP100024502       | Ubiquitin 4                                                                      | NPAMMQEIMR                     | a                        |
| IP100220416       | Ubiquitin-cytochrome c reductase complex 14 kDa protein                          | DDTVEDEDVK                     | d; e                     |
| IP100220416       | Ubiquitin-cytochrome c reductase complex 14 kDa protein                          | EQWTK                          | d                        |
| IP100220416       | Ubiquitin-cytochrome c reductase complex 14 kDa protein                          | QAVSAGK                        | d; e                     |
| IP100220416       | Ubiquitin-cytochrome c reductase complex 14 kDa protein                          | WLDGIR                         | e                        |
| IP100220416       | Ubiquitin-cytochrome c reductase complex 14 kDa protein                          | WYVNAAGFNK                     | d; e                     |
| IP100220416       | Ubiquitin-cytochrome c reductase complex 14 kDa protein                          | YEEENFVLEPYLK                  | d                        |
| IP100024742       | Ubiquitin-cytochrome c reductase complex ubiquinone-binding protein QP-C         | AYPHVFTK                       | c; d                     |
| IP100024742       | Ubiquitin-cytochrome c reductase complex ubiquinone-binding protein QP-C         | EFGNLTR                        | d                        |
| IP100024742       | Ubiquitin-cytochrome c reductase complex ubiquinone-binding protein QP-C         | HVISVLSPEFQR                   | e                        |
| IP100026964       | Ubiquitin-cytochrome c reductase iron-sulfur subunit, mitochondrial precursor    | EIEQEAIVESQLR                  | d; e                     |
| IP100026964       | Ubiquitin-cytochrome c reductase iron-sulfur subunit, mitochondrial precursor    | GVAGALRPLVQATVFATPEQPVLDK      | e                        |
| IP100026964       | Ubiquitin-cytochrome c reductase iron-sulfur subunit, mitochondrial precursor    | SGFPAPVLSATR                   | e                        |
| IP100305383       | Ubiquitin-cytochrome-c reductase complex core protein 2, mitochondrial precursor | AAVYNQK                        | d                        |
| IP100305383       | Ubiquitin-cytochrome-c reductase complex core protein 2, mitochondrial precursor | ATAAPGAPGPPQDLEFK              | d; e                     |
| IP100305383       | Ubiquitin-cytochrome-c reductase complex core protein 2, mitochondrial precursor | AVAFNPQTHVIEVNHAAAYR           | d                        |
| IP100305383       | Ubiquitin-cytochrome-c reductase complex core protein 2, mitochondrial precursor | IGLFK                          | d; e                     |
| IP100305383       | Ubiquitin-cytochrome-c reductase complex core protein 2, mitochondrial precursor | LPNGLVIALENYSPVSR              | e                        |
| IP100305383       | Ubiquitin-cytochrome-c reductase complex core protein 2, mitochondrial precursor | NALANPLYCPDYR                  | d; e                     |
| IP100305383       | Ubiquitin-cytochrome-c reductase complex core protein 2, mitochondrial precursor | QVAEQFLNMR                     | e                        |
| IP100305383       | Ubiquitin-cytochrome-c reductase complex core protein 2, mitochondrial precursor | YEDFSNLGTHLLR                  | c; d                     |
| IP100013847       | Ubiquitin-cytochrome-c reductase complex core protein 1, mitochondrial precursor | AVELLGDIVQNCSELEDSQIEK         | e                        |
| IP100013847       | Ubiquitin-cytochrome-c reductase complex core protein 1, mitochondrial precursor | DVVFNYLHATAFGQTPLAQAVEGPESENVR | d; e                     |
| IP100013847       | Ubiquitin-cytochrome-c reductase complex core protein 1, mitochondrial precursor | EMQENDASMR                     | d; e                     |
| IP100013847       | Ubiquitin-cytochrome-c reductase complex core protein 1, mitochondrial precursor | HLGGIPWYIADAVPTLTPCR           | d; e                     |
| IP100013847       | Ubiquitin-cytochrome-c reductase complex core protein 1, mitochondrial precursor | IAEVDASVVR                     | d                        |
| IP100013847       | Ubiquitin-cytochrome-c reductase complex core protein 1, mitochondrial precursor | NALVSHLDGTTVPVEDIGR            | b; d; e                  |
| IP100013847       | Ubiquitin-cytochrome-c reductase complex core protein 1, mitochondrial precursor | SGMFWLR                        | c                        |
| IP100013847       | Ubiquitin-cytochrome-c reductase complex core protein 1, mitochondrial precursor | SLITYGR                        | e                        |
| IP100013847       | Ubiquitin-cytochrome-c reductase complex core protein 1, mitochondrial precursor | YIYDOCPAVAGYGPVIEQLPDYNR       | d; e                     |
| IP100456429       | Ubiquitin and ribosomal protein L40                                              | EGIPPQQR                       | a; c; d                  |
| IP100456429       | Ubiquitin and ribosomal protein L40                                              | LIFAGK                         | a; d                     |
| IP100456429       | Ubiquitin and ribosomal protein L40                                              | TITLVEVPSDTHENVK               | a; c; d; e               |
| IP100456429       | Ubiquitin and ribosomal protein L40 precursor                                    | TLSVDYIQK                      | a; d; e                  |
| IP100456429       | Ubiquitin and ribosomal protein L40 precursor                                    | ESTLHLVLR                      | c; d                     |
| IP100456429       | Ubiquitin and ribosomal protein L40 precursor                                    | MQIFVK                         | d; e                     |
| IP100456429       | Ubiquitin and ribosomal protein L40 precursor                                    | QLEDGR                         | d                        |
| IP100238081       | Ubiquitin associated protein 2 isoform 2                                         | SQQTLDTPK                      | a                        |
| IP100398505       | Ubiquitin carboxyl-terminal hydrolase 24                                         | FGFDWESGRSIK                   | a                        |
| IP100398505       | Ubiquitin carboxyl-terminal hydrolase 24                                         | IYQMYR                         | a                        |
| IP100398505       | Ubiquitin carboxyl-terminal hydrolase 24                                         | QDSSEVGENGR                    | a                        |
| IP100398738       | Ubiquitin carboxyl-terminal hydrolase 51                                         | ESRMKEGQPPTDCVPNE              | a                        |
| IP100398738       | Ubiquitin carboxyl-terminal hydrolase 51                                         | FEHVQK                         | a                        |
| IP100398738       | Ubiquitin carboxyl-terminal hydrolase 51                                         | LEPLQER                        | a                        |
| IP100030915       | Ubiquitin carboxyl-terminal hydrolase 8                                          | EELTDNRR                       | a                        |
| IP100030915       | Ubiquitin carboxyl-terminal hydrolase 8                                          | TQKSNGEK                       | a                        |
| IP100018352       | Ubiquitin carboxyl-terminal hydrolase isozyme L1                                 | EFTER                          | d                        |
| IP100018352       | Ubiquitin carboxyl-terminal hydrolase isozyme L1                                 | EQGEVR                         | c; d                     |
| IP100018352       | Ubiquitin carboxyl-terminal hydrolase isozyme L1                                 | PSAVALCK                       | c; d; e                  |
| IP100018352       | Ubiquitin carboxyl-terminal hydrolase isozyme L1                                 | GQEVSPK                        | c; d; e                  |
| IP100018352       | Ubiquitin carboxyl-terminal hydrolase isozyme L1                                 | LGFEDEGSVLK                    | c; d; e                  |
| IP100018352       | Ubiquitin carboxyl-terminal hydrolase isozyme L1                                 | LGVAGQWR                       | c; d                     |
| IP100018352       | Ubiquitin carboxyl-terminal hydrolase isozyme L1                                 | MPPFVNHGASSEDLLK               | c; d                     |
| IP100018352       | Ubiquitin carboxyl-terminal hydrolase isozyme L1                                 | MQLKPEINPEMLNK                 | c; d; e                  |
| IP100018352       | Ubiquitin carboxyl-terminal hydrolase isozyme L1                                 | MSPEDR                         | d                        |
| IP100018352       | Ubiquitin carboxyl-terminal hydrolase isozyme L1                                 | NEAIOAAHDVAQEGQCR              | c; d; e                  |
| IP100018352       | Ubiquitin carboxyl-terminal hydrolase isozyme L1                                 | QFLSETEK                       | c; d; e                  |
| IP100018352       | Ubiquitin carboxyl-terminal hydrolase isozyme L1                                 | QHEELK                         | d; e                     |
| IP100018352       | Ubiquitin carboxyl-terminal hydrolase isozyme L1                                 | QHEELKQGEVSPK                  | d                        |
| IP100018352       | Ubiquitin carboxyl-terminal hydrolase isozyme L1                                 | QTIGNSCGTGLIHAVANNQDK          | d                        |
| IP100018352       | Ubiquitin carboxyl-terminal hydrolase isozyme L1                                 | VYFMK                          | c; d; e                  |
| IP100028957       | Ubiquitin conjugation factor E4 A                                                | SQQEICEQLNHNMIQR               | a                        |
| IP100022561       | Ubiquitin ligase protein RNF8                                                    | ARLEPLR                        | a                        |
| IP100022561       | Ubiquitin ligase protein RNF8                                                    | NDQMIK                         | a                        |
| IP100640357       | ubiquitin specific protease 14 isoform b                                         | AQLFALTVQPAR                   | e                        |
| IP100645078       | Ubiquitin-activating enzyme E1                                                   | AEVSQPR                        | e                        |
| IP100645078       | Ubiquitin-activating enzyme E1                                                   | ALPAVQNNLDEDLIR                | d                        |
| IP100645078       | Ubiquitin-activating enzyme E1                                                   | DDDSNFHMDIV AASNLR             | d                        |
| IP100645078       | Ubiquitin-activating enzyme E1                                                   | DEFEGLFK                       | c; d; e                  |
| IP100645078       | Ubiquitin-activating enzyme E1                                                   | DNPGVVCTLEAR                   | e                        |
| IP100645078       | Ubiquitin-activating enzyme E1                                                   | IYDDDFQNDLGVANALDNVDAR         | d                        |
| IP100645078       | Ubiquitin-activating enzyme E1                                                   | LACTQPLEVLEAVQR                | d; e                     |
| IP100645078       | Ubiquitin-activating enzyme E1                                                   | NFPNAIEHTLQWAR                 | d; e                     |
| IP100645078       | Ubiquitin-activating enzyme E1                                                   | QLLDYFK                        | d                        |
| IP100217042       | Ubiquitin-activating factor E4B                                                  | NPVIVAK                        | a                        |
| IP100217042       | Ubiquitin-activating factor E4B                                                  | QSQLAQDER                      | a                        |
| IP100217042       | Ubiquitin-activating factor E4B                                                  | SLSDK                          | a                        |
| IP100217042       | Ubiquitin-activating factor E4B                                                  | TVEDLK                         | a                        |
| IP100003949       | Ubiquitin-conjugating enzyme E2 N                                                | LELFLPEEYPMAPK                 | d                        |
| IP100003949       | Ubiquitin-conjugating enzyme E2 N                                                | YEHVIAQGPSPEGGTFK              | d                        |
| IP100019600       | Ubiquitin-conjugating enzyme E2 variant 2                                        | LLEELLEGQK                     | c; d                     |
| IP100019600       | Ubiquitin-conjugating enzyme E2 variant 2                                        | LPQPPEGGQTYNN                  | e                        |



| IPI Accession No. | Protein Description                                           | Peptide Sequence*        | Primary Source Dataset** |
|-------------------|---------------------------------------------------------------|--------------------------|--------------------------|
| IP100019600       | Ubiquitin-conjugating enzyme E2 variant 2                     | VECGPK                   | d                        |
| IP100019600       | Ubiquitin-conjugating enzyme E2 variant 2                     | VYLQELR                  | d                        |
| IP100019600       | Ubiquitin-conjugating enzyme E2 variant 2                     | WQSSYSIK                 | d                        |
| IP100019600       | Ubiquitin-conjugating enzyme E2 variant 2                     | WTGMIIQFPR               | d                        |
| IP100019600       | Ubiquitin-conjugating enzyme E2 variant 2                     | YPEAPPSVR                | c; d; e                  |
| IP100026320       | Ubiquitin-conjugating enzyme E2 variant 2                     | AEFDENAR                 | d; e                     |
| IP100376844       | Ubiquitin-conjugating enzyme E2N-like                         | IYHPVVDK                 | c                        |
| IP100376844       | Ubiquitin-conjugating enzyme E2N-like                         | TNEAQIETAR               | c; d; e                  |
| IP100026320       | Ubiquitin-protein ligase EDD                                  | GTHTSLMQRLNR             | a                        |
| IP100026320       | Ubiquitin-protein ligase EDD                                  | MSMTER                   | a                        |
| IP100026320       | Ubiquitin-protein ligase EDD                                  | SSGLRAGSR                | a                        |
| IP100026320       | Ubiquitin-protein ligase EDD                                  | WSSGVGGSGGSSGR           | a                        |
| IP100297289       | Ubiquitin-specific proteinase 31                              | EILEKMK                  | a                        |
| IP100297289       | Ubiquitin-specific proteinase 31                              | NTGDDEAER                | a                        |
| IP100297289       | Ubiquitin-specific proteinase 31                              | RTSLASLSEVMTGER          | a                        |
| IP100297289       | Ubiquitin-specific proteinase 31                              | SASALTYASSTSAK           | a                        |
| IP100024638       | Ubiquitous mitochondrial creatine kinase variant (Fragment)   | GDLAGR                   | c                        |
| IP100024638       | Ubiquitous mitochondrial creatine kinase variant (Fragment)   | LGVILTCPSNLGTGLR         | d; e                     |
| IP100024467       | UDP-glucose:glycoprotein                                      | ARSLTRIAVQHMRR           | a                        |
| IP100024467       | UDP-glucose:glycoprotein                                      | TKGLWDSIK                | a                        |
| IP100514049       | UMP-CMP kinase                                                | FLIDGFPR                 | d; e                     |
| IP100644184       | UNC45B protein                                                | FLADGNDR                 | c; d                     |
| IP100479433       | Uncharacterized hypothalamus protein                          | AVTHQVK                  | a                        |
| IP100479433       | Uncharacterized hypothalamus protein                          | DELEKDTMDNWDEKK          | a                        |
| IP100657648       | upregulated in colorectal cancer gene 1 protein precursor     | QVMYQSSGR                | c; d                     |
| IP100297559       | Usher syndrome 1C binding protein 1                           | AWDPEKLAQELAAALTR        | a                        |
| IP100297559       | Usher syndrome 1C binding protein 1                           | VLLALR                   | a                        |
| IP100410150       | Usher syndrome 2A isoform B                                   | ETMFYYR                  | a                        |
| IP100410150       | Usher syndrome 2A isoform B                                   | FQVEACTSK                | a                        |
| IP100410150       | Usher syndrome 2A isoform B                                   | TQGSRK                   | a                        |
| IP100410150       | Usher syndrome 2A isoform B                                   | TSPSAPSGMEPPKQAR         | a                        |
| IP100410150       | Usher syndrome 2A isoform B                                   | VLYYELR                  | a                        |
| IP100107113       | UTP14, U3 small nucleolar                                     | ARMMERMSLK               | a                        |
| IP100107113       | UTP14, U3 small nucleolar                                     | ASLRAMSLEAKMIR           | a                        |
| IP100107113       | UTP14, U3 small nucleolar                                     | LLEAISSLDGKNRR           | a                        |
| IP100009329       | Utrophin                                                      | AMEEWR                   | a                        |
| IP100009329       | Utrophin                                                      | EVETLPR                  | a                        |
| IP100009329       | Utrophin                                                      | HQAKCNICK                | a                        |
| IP100009329       | Utrophin                                                      | LAILK                    | a                        |
| IP100644301       | Utrophin                                                      | QLDDLNR                  | c                        |
| IP100009329       | Utrophin                                                      | QVMK                     | a                        |
| IP100008223       | UV excision repair protein RAD23 homolog B                    | AVEYLLMGIPGDR            | d                        |
| IP100008223       | UV excision repair protein RAD23 homolog B                    | TLQQQTFK                 | d                        |
| IP100173359       | Uveal autoantigen                                             | EHEK                     | a                        |
| IP100173359       | Uveal autoantigen                                             | LMKAAER                  | a                        |
| IP100173359       | Uveal autoantigen                                             | SLNGTIENLK               | a                        |
| IP100018855       | Vacuolar ATP synthase 16 kDa proteolipid subunit              | GTAQQR                   | d; e                     |
| IP100007682       | Vacuolar ATP synthase catalytic subunit A, ubiquitous isoform | ALDEYDK                  | d                        |
| IP100007682       | Vacuolar ATP synthase catalytic subunit A, ubiquitous isoform | AVETTAQSDNK              | c; d; e                  |
| IP100007682       | Vacuolar ATP synthase catalytic subunit A, ubiquitous isoform | DFPELTMEVDGK             | d                        |
| IP100007682       | Vacuolar ATP synthase catalytic subunit A, ubiquitous isoform | EILQEEEDLAEIVQLVKG       | d; e                     |
| IP100007682       | Vacuolar ATP synthase catalytic subunit A, ubiquitous isoform | FCPFYK                   | c; d; e                  |
| IP100007682       | Vacuolar ATP synthase catalytic subunit A, ubiquitous isoform | FTMVQWVPVR               | e                        |
| IP100007682       | Vacuolar ATP synthase catalytic subunit A, ubiquitous isoform | HFTFVPLR                 | c; d                     |
| IP100007682       | Vacuolar ATP synthase catalytic subunit A, ubiquitous isoform | ITLEVAK                  | d                        |
| IP100007682       | Vacuolar ATP synthase catalytic subunit A, ubiquitous isoform | ITWSHR                   | d; e                     |
| IP100007682       | Vacuolar ATP synthase catalytic subunit A, ubiquitous isoform | LAEMPADSGYPVALGAR        | c; d; e                  |
| IP100007682       | Vacuolar ATP synthase catalytic subunit A, ubiquitous isoform | LEGDMATIQVVEETSGVSGDPVLR | d                        |
| IP100007682       | Vacuolar ATP synthase catalytic subunit A, ubiquitous isoform | LPANIHLLTGQR             | c; d                     |
| IP100007682       | Vacuolar ATP synthase catalytic subunit A, ubiquitous isoform | SDYAQLLEDQMNAFR          | d; e                     |
| IP100007682       | Vacuolar ATP synthase catalytic subunit A, ubiquitous isoform | TALVANTSNMFPVAAR         | c; d; e                  |
| IP100007682       | Vacuolar ATP synthase catalytic subunit A, ubiquitous isoform | TVGMLSNMIAFYDMAR         | d                        |
| IP100007682       | Vacuolar ATP synthase catalytic subunit A, ubiquitous isoform | VGHSELVGEHR              | d                        |
| IP100007682       | Vacuolar ATP synthase catalytic subunit A, ubiquitous isoform | WDFTPCK                  | c; d                     |
| IP100007812       | Vacuolar ATP synthase subunit B, brain isoform                | AVVQVFEETGSGIDAK         | c; d; e                  |
| IP100007812       | Vacuolar ATP synthase subunit B, brain isoform                | EEVPGR                   | d; e                     |
| IP100007812       | Vacuolar ATP synthase subunit B, brain isoform                | EQALAVSR                 | d                        |
| IP100007812       | Vacuolar ATP synthase subunit B, brain isoform                | GFPGYMYTDLATIVER         | d; e                     |
| IP100007812       | Vacuolar ATP synthase subunit B, brain isoform                | GPVVLAEFLDMGQPINPQCR     | d; e                     |
| IP100007812       | Vacuolar ATP synthase subunit B, brain isoform                | IPFSAAGLPHINEAAQICR      | e                        |
| IP100007812       | Vacuolar ATP synthase subunit B, brain isoform                | IPQSTLSEFYPR             | d                        |
| IP100007812       | Vacuolar ATP synthase subunit B, brain isoform                | IYPEEMIQTGISAIDGMNSIAR   | d                        |
| IP100007812       | Vacuolar ATP synthase subunit B, brain isoform                | NFLAQGPYENR              | c; d                     |
| IP100007812       | Vacuolar ATP synthase subunit B, brain isoform                | NYSQPR                   | c; d                     |
| IP100007812       | Vacuolar ATP synthase subunit B, brain isoform                | QIYPPINVLPSLSR           | d; e                     |
| IP100007812       | Vacuolar ATP synthase subunit B, brain isoform                | SGQVLEVSGSK              | d                        |
| IP100007812       | Vacuolar ATP synthase subunit B, brain isoform                | TPVSEDMILGR              | e                        |
| IP100007812       | Vacuolar ATP synthase subunit B, brain isoform                | TSCEFTGDILR              | d                        |
| IP100034159       | Vacuolar ATP synthase subunit d                               | ADDEYQVK                 | c; d; e                  |
| IP100034159       | Vacuolar ATP synthase subunit d                               | AYLESFYK                 | d                        |
| IP100034159       | Vacuolar ATP synthase subunit d                               | IDNYIPIF                 | d                        |
| IP100034159       | Vacuolar ATP synthase subunit d                               | LYPEGLAQLAR              | d; e                     |
| IP100034159       | Vacuolar ATP synthase subunit d                               | NVADYYPEVK               | d                        |
| IP100001568       | Vacuolar ATP synthase subunit D                               | FTAGDFSTTVIQNVNK         | e                        |
| IP100001568       | Vacuolar ATP synthase subunit D                               | TLAVIHTELDER             | d                        |
| IP100003856       | Vacuolar ATP synthase subunit E                               | AIPMYK                   | a                        |
| IP100003856       | Vacuolar ATP synthase subunit E                               | IQMSNLINQARLK            | a                        |
| IP100003856       | Vacuolar ATP synthase subunit E                               | QDFPLVKAAVQK             | a                        |
| IP100003856       | Vacuolar ATP synthase subunit E                               | YSNTLESRLDLIAQQMMP       | a                        |
| IP100032147       | Vacuolar ATP synthase subunit G 2                             | EEAQMEVEQYR              | c; d; e                  |
| IP100032147       | Vacuolar ATP synthase subunit G 2                             | QVQGMQSSQQR              | c; d; e                  |
| IP100020430       | Vacuolar ATP synthase subunit S1                              | LSIEDFTAYGVFGNK          | a                        |
| IP100020430       | Vacuolar ATP synthase subunit S1                              | MMAAMATARVRMGPR          | a                        |
| IP100020430       | Vacuolar ATP synthase subunit S1                              | NVLLFLQDK                | a                        |
| IP100020430       | Vacuolar ATP synthase subunit S1 precursor                    | FILANR                   | d                        |
| IP100719806       | vacuolar H+ ATPase E1 isoform b                               | DDLITDLNEAK              | d                        |
| IP100719866       | vacuolar H+ ATPase E1 isoform c                               | GALFGANAR                | e                        |

| IPI Accession No. | Protein Description                                 | Peptide Sequence*   | Primary Source Dataset** |
|-------------------|-----------------------------------------------------|---------------------|--------------------------|
| IP100719366       | vacuolar H+ ATPase E1 isoform c                     | IMEYYEK             | d; e                     |
| IP100719366       | vacuolar H+ ATPase E1 isoform c                     | LDLIAQQMMPEVR       | d                        |
| IP100719366       | vacuolar H+ ATPase E1 isoform c                     | LVQTQR              | d                        |
| IP100719366       | vacuolar H+ ATPase E1 isoform c                     | QIEQOK              | c; d; e                  |
| IP100411426       | Vacuolar protein sorting 26                         | FESPEEQASAEQPEM     | e                        |
| IP100018931       | Vacuolar protein sorting 35                         | CFSEENHEPLR         | d                        |
| IP100018931       | Vacuolar protein sorting 35                         | ESPESEGPYEGLLI      | e                        |
| IP100018931       | Vacuolar protein sorting 35                         | NIHALIDR            | d                        |
| IP100018931       | Vacuolar protein sorting 35                         | PTTQQSPQDEQEK       | d; e                     |
| IP100411356       | Vacuolar sorting protein 4a                         | IYPLPEAAAR          | e                        |
| IP100472451       | Vav 2 oncogene                                      | DMRELSLR            | d                        |
| IP100006865       | Vesicle trafficking protein SEC22b                  | IMVANIEEVLQR        | d; e                     |
| IP100553138       | Vesicle-associated membrane protein 2               | ADALQAGASQFETSAAK   | d; e                     |
| IP100553138       | Vesicle-associated membrane protein 2               | LQQTQAVQDEVVDIR     | d; e                     |
| IP100553138       | Vesicle-associated membrane protein 2               | VNVDK               | e                        |
| IP100006451       | Vesicle-fusing ATPase                               | DFQSGQHVIVR         | e                        |
| IP100006451       | Vesicle-fusing ATPase                               | EEGASLPDFD          | d                        |
| IP100006451       | Vesicle-fusing ATPase                               | EFSDFR              | d; e                     |
| IP100006451       | Vesicle-fusing ATPase                               | FLALLR              | e                        |
| IP100006451       | Vesicle-fusing ATPase                               | GILLYGPPGCGK        | b; d; e                  |
| IP100006451       | Vesicle-fusing ATPase                               | IAEESNPFITK         | c; d; e                  |
| IP100006451       | Vesicle-fusing ATPase                               | KLFADAEERQ          | e                        |
| IP100006451       | Vesicle-fusing ATPase                               | LFADAEERQ           | c; d                     |
| IP100006451       | Vesicle-fusing ATPase                               | LLDYVPIGPR          | d                        |
| IP100006451       | Vesicle-fusing ATPase                               | LLIGTISR            | d                        |
| IP100006451       | Vesicle-fusing ATPase                               | MIGGLDKFESDFR       | d                        |
| IP100006451       | Vesicle-fusing ATPase                               | MIGSETAK            | e                        |
| IP100006451       | Vesicle-fusing ATPase                               | NFSGALEGLVR         | d; e                     |
| IP100006451       | Vesicle-fusing ATPase                               | SQSCVVVDDIER        | d; e                     |
| IP100006451       | Vesicle-fusing ATPase                               | THPSVYVGSIAFSLPQR   | e                        |
| IP100006451       | Vesicle-fusing ATPase                               | VEVDMEK             | d                        |
| IP100006451       | Vesicle-fusing ATPase                               | VLDGELLVQYTK        | d; e                     |
| IP100006451       | Vesicle-fusing ATPase                               | YVGESEANIR          | c; d                     |
| IP100026015       | Vesicular inhibitory amino acid transporter         | DQVGGGEGFGGHDKPK    | c                        |
| IP100069058       | VEGF nerve growth factor inducible precursor        | NAPPEVPPPR          | c; d; e                  |
| IP100069058       | VEGF nerve growth factor inducible precursor        | NSEPODEGELFGVDPR    | c                        |
| IP100069058       | VEGF nerve growth factor inducible precursor        | VEEDEEAEEAEAEAEAEER | d; e                     |
| IP100022228       | Vigilin                                             | EAKDCDPSRPR         | a                        |
| IP100022228       | Vigilin                                             | SDIVQLR             | a                        |
| IP100022228       | Vigilin                                             | SVMGPK              | a                        |
| IP100646867       | Vimentin                                            | EMEEFAVEAANYQDTIGR  | c; e                     |
| IP100646867       | Vimentin                                            | ILLAELEQLK          | c; d                     |
| IP100646867       | Vimentin                                            | ISLPLPNFSSLNLR      | d; e                     |
| IP100646867       | Vimentin                                            | NLQEAEEWYK          | c                        |
| IP100175793       | Vimentin-type IF-associated coiled-coil protein     | MSAPPALQIR          | c                        |
| IP100307162       | vinculin isoform meta-VCL                           | GEGESQAR            | c                        |
| IP100307162       | Vinculin isoform meta-VCL                           | ALASQLQDSLKDLK      | a                        |
| IP100307162       | Vinculin isoform meta-VCL                           | EAEAASIKIR          | a                        |
| IP100307162       | Vinculin isoform meta-VCL                           | IFVTKNSK            | a                        |
| IP100307162       | Vinculin isoform meta-VCL                           | MQEAMTQEVSDVSDTT    | a                        |
| IP100307162       | Vinculin isoform meta-VCL                           | NLPGMTKMAK          | a                        |
| IP100307162       | Vinculin isoform meta-VCL                           | WIDNPTVDDRGVQAAI    | a                        |
| IP100216313       | Visinin-like protein 1                              | DDQITLDEFK          | d                        |
| IP100216313       | Visinin-like protein 1                              | FAQHAFR             | c; d                     |
| IP100216313       | Visinin-like protein 1                              | FFPYGDASK           | c; e                     |
| IP100216313       | Visinin-like protein 1                              | LAPEVMEDLVK         | d; e                     |
| IP100216313       | Visinin-like protein 1                              | LNLEEFQQLYVK        | c; d; e                  |
| IP100216313       | Visinin-like protein 1                              | LNWAFNMYDLGDGK      | d; e                     |
| IP100216313       | Visinin-like protein 1                              | MNEDGLTPEQR         | c; d; e                  |
| IP100216313       | Visinin-like protein 1                              | NKDDQITLDEFK        | d                        |
| IP100216313       | Visinin-like protein 1                              | STEFNEHELK          | c; d                     |
| IP100216313       | Visinin-like protein 1                              | VEMLEIETAYK         | d                        |
| IP100216308       | Voltage-dependent anion-selective channel protein 1 | FGIAAK              | e                        |
| IP100216308       | Voltage-dependent anion-selective channel protein 1 | GYGFGLIK            | c; d; e                  |
| IP100216308       | Voltage-dependent anion-selective channel protein 1 | LTFDSSFSPTGK        | e                        |
| IP100216308       | Voltage-dependent anion-selective channel protein 1 | VTQSNFAVGYK         | d; e                     |
| IP100216308       | Voltage-dependent anion-selective channel protein 1 | WNTDNTLGTETVEDQLAR  | d; e                     |
| IP100216308       | Voltage-dependent anion-selective channel protein 1 | WTEYGLTFTEK         | e                        |
| IP100216308       | Voltage-dependent anion-selective channel protein 1 | YQIDPDAFCSAK        | d; e                     |
| IP100299240       | Voltage-dependent L-type calcium                    | AINRAKGLK           | a                        |
| IP100299240       | Voltage-dependent L-type calcium                    | QQLDEDLR            | a                        |
| IP100334159       | Von Hippel-Lindau binding protein 1                 | NLDSLEEDLFLR        | d                        |
| IP100023014       | Von Willebrand factor precursor                     | DAVCTRSVTVRLPGLHN   | a                        |
| IP100023014       | Von Willebrand factor precursor                     | GRLLVK              | a                        |
| IP100023014       | Von Willebrand factor precursor                     | RFASGK              | a                        |
| IP100023014       | Von Willebrand factor precursor                     | TNTGLALR            | a                        |
| IP100010381       | VPS10 domain-containing receptor                    | GLHVVTIDGR          | a                        |
| IP100465428       | VPS13C-2A protein                                   | DFGDSLARGGK         | a                        |
| IP100465428       | VPS13C-2A protein                                   | EFIIK               | a                        |
| IP100465428       | VPS13C-2A protein                                   | HPADFR              | a                        |
| IP100465428       | VPS13C-2A protein                                   | IQGLDSSLQLQSR       | a                        |
| IP100465428       | VPS13C-2A protein                                   | KAVSILGDEVFR        | a                        |
| IP100465428       | VPS13C-2A protein                                   | LYNVR               | a                        |
| IP100465428       | VPS13C-2A protein                                   | MFKDGSMTNVSVK       | a                        |
| IP100465428       | VPS13C-2A protein                                   | SLFGHTVGGAAGVVSR    | a                        |
| IP100465428       | VPS13C-2A protein                                   | VLLFTDDVALVSK       | a                        |
| IP100479404       | VPS13D-1A protein                                   | DTATLSGPR           | a                        |
| IP100479404       | VPS13D-1A protein                                   | GRGRYIDTVMVFAPR     | a                        |
| IP100479404       | VPS13D-1A protein                                   | HRHTHDLR            | a                        |
| IP100479404       | VPS13D-1A protein                                   | LKGGLLSTDKKEEMCR    | a                        |
| IP100479404       | VPS13D-1A protein                                   | LNQLQR              | a                        |
| IP100479404       | VPS13D-1A protein                                   | RSSLPVSNRHLVSK      | a                        |
| IP100479404       | VPS13D-1A protein                                   | SALIVR              | a                        |
| IP100479404       | VPS13D-1A protein                                   | SDRLQVEIK           | a                        |
| IP100479404       | VPS13D-1A protein                                   | VHTSGFYQSELELRVA    | a                        |
| IP100291916       | WD repeat domain 11 protein                         | DADVPGTSTRKR        | a                        |
| IP100291916       | WD repeat domain 11 protein                         | DHQPRRR             | a                        |

| IPI Accession No. | Protein Description                              | Peptide Sequence*  | Primary Source Dataset** |
|-------------------|--------------------------------------------------|--------------------|--------------------------|
| IP100291916       | WD repeat domain 11 protein                      | DLVAWSRR           | a                        |
| IP100291916       | WD repeat domain 11 protein                      | ISELEFHDK          | a                        |
| IP100291916       | WD repeat domain 11 protein                      | IWATDDGR           | a                        |
| IP100291916       | WD repeat domain 11 protein                      | LSRGSISSTEVHISPPNV | a                        |
| IP100291916       | WD repeat domain 11 protein                      | NNSAKENMEK         | a                        |
| IP100291916       | WD repeat domain 11 protein                      | RTAFYNEDDSEEEQR    | a                        |
| IP100396243       | WD repeat membrane protein                       | IGNVGVMSLEQIK      | a                        |
| IP100396243       | WD repeat membrane protein                       | TSGNYLAVTGADYIVK   | a                        |
| IP100396243       | WD repeat membrane protein                       | VQLHLIESEILDAQEER  | a                        |
| IP100746165       | WD repeat-containing protein 1 isoform 1         | YEVQPFAGK          | d                        |
| IP100289944       | WDR9 protein, form A                             | DAVQMPSETLKAK      | a                        |
| IP100289944       | WDR9 protein, form A                             | MDLRDQELVKVIGIR    | a                        |
| IP100289944       | WDR9 protein, form A                             | TCMHNQK            | a                        |
| IP100106567       | WD-repeat protein 33                             | ATEIGSPRFFHMMPR    | a                        |
| IP100106567       | WD-repeat protein 33                             | GPPGAWEGRPRGDERF   | a                        |
| IP100025830       | Wee1-like protein kinase                         | BSSPQVEEGDSR       | a                        |
| IP100025830       | Wee1-like protein kinase                         | QGRLLPR            | a                        |
| IP100290314       | Werner helicase interacting protein              | DLGVYK             | a                        |
| IP100290314       | Werner helicase interacting protein              | LPVEAMVITLMR       | a                        |
| IP100290314       | Werner helicase interacting protein              | SFFKRR             | a                        |
| IP100029107       | Werner syndrome helicase                         | MEKYLHSSRCR        | a                        |
| IP100029107       | Werner syndrome helicase                         | MRPTTVENVK         | a                        |
| IP100157375       | Williams-Beuren syndrome chromosome              | TPADDPGSPR         | a                        |
| IP100472164       | Wiskott-Aldrich syndrome protein family member 2 | RDVGVNDVATLSR      | d                        |
| IP100011031       | Wnt-7b protein precursor                         | EIKKNAR            | a                        |
| IP100011031       | Wnt-7b protein precursor                         | FHWCCFVK           | a                        |
| IP100011031       | Wnt-7b protein precursor                         | MQLCK              | a                        |
| IP100334604       | Wolf-Hirschhorn syndrome candidate 1             | GPSCLLTGPK         | a                        |
| IP100334604       | Wolf-Hirschhorn syndrome candidate 1             | IQDPTEDAAEDTPR     | a                        |
| IP100334604       | Wolf-Hirschhorn syndrome candidate 1             | RGVGSPPGR          | a                        |
| IP100334604       | Wolf-Hirschhorn syndrome candidate 1             | STPQKTAEDPRR       | a                        |
| IP100008711       | Wolframin                                        | DAAPAEPAQGHTR      | c                        |
| IP100069058       | WUGSC.H_DJ0747G18.3 protein                      | ASWGEFQAR          | a                        |
| IP100069058       | WUGSC.H_DJ0747G18.3 protein                      | DELDPWNEVLPWDR     | a                        |
| IP100069058       | WUGSC.H_DJ0747G18.3 protein                      | EAEGTTEEGEEEDDEEM  | a                        |
| IP100069058       | WUGSC.H_DJ0747G18.3 protein                      | FGEGVSSPK          | a                        |
| IP100069058       | WUGSC.H_DJ0747G18.3 protein                      | VNLESPGPR          | a                        |
| IP100478665       | WW domain containing adaptor with                | RDAGDPSPPNKMLR     | a                        |
| IP100010241       | WW domain-containing adapter with a              | DRDYRR             | a                        |
| IP100010241       | WW domain-containing adapter with a              | ILFLR              | a                        |
| IP100010241       | WW domain-containing adapter with a              | QQRISDGGCHDRR      | a                        |
| IP100010241       | WW domain-containing adapter with a              | TEVSQWEKPKWLER     | a                        |
| IP100244391       | Xanthine dehydrogenase                           | AHAKISIDTSEAK      | a                        |
| IP100244391       | Xanthine dehydrogenase                           | GTRRTVQMDHIFPPGYR  | a                        |
| IP100244391       | Xanthine dehydrogenase                           | LKDTPRK            | a                        |
| IP100244391       | Xanthine dehydrogenase                           | LTLVSRGTRR         | a                        |
| IP100168819       | X-kinase                                         | KPYSGFNMMIIR       | a                        |
| IP100168819       | X-kinase                                         | KQGMISLEK          | a                        |
| IP100183487       | Xylosyltransferase I                             | ARGGPGPEPR         | a                        |
| IP100183487       | Xylosyltransferase I                             | DLPAEPAAR          | a                        |
| IP100183487       | Xylosyltransferase I                             | GGAAVGGGEQPPAPAP   | a                        |
| IP100183487       | Xylosyltransferase I                             | IPEGIAVDGSDWFLNLR  | a                        |
| IP100183487       | Xylosyltransferase I                             | NFGGLLGMDEPVGMIQ   | a                        |
| IP100183487       | Xylosyltransferase I                             | TNDQLVAFLSR        | a                        |
| IP100477901       | Yeast INO80-like protein                         | GSGSTARGAGK        | a                        |
| IP100477901       | Yeast INO80-like protein                         | NKDFLLGVNFFLSPPNLC | a                        |
| IP100477901       | Yeast INO80-like protein                         | RDEELSSEESPR       | a                        |
| IP100477901       | Yeast INO80-like protein                         | VLYVQMITR          | a                        |
| IP100010200       | YTH domain containing 2                          | DGSETAHAMMTCNLTHN  | a                        |
| IP100010200       | YTH domain containing 2                          | ESDFLLTK           | a                        |
| IP100010200       | YTH domain containing 2                          | GNVFAVEAENREMSK    | a                        |
| IP100010200       | YTH domain containing 2                          | IDEEVK             | a                        |
| IP100006610       | Zinc finger BED domain containing                | ENNLK              | a                        |
| IP100006610       | Zinc finger BED domain containing                | ESPSASSSPDR        | a                        |
| IP100006610       | Zinc finger BED domain containing                | SQRMVQNLLSLAR      | a                        |
| IP100006610       | Zinc finger BED domain containing                | WSTSFHMLERLIEQK    | a                        |
| IP100436705       | Zinc finger CW-type coiled-coil domain           | SSLNAKNR           | a                        |
| IP100288918       | Zinc finger FYVE domain containing               | AGAAMNRR           | a                        |
| IP100288918       | Zinc finger FYVE domain containing               | APFTVRR            | a                        |
| IP100288918       | Zinc finger FYVE domain containing               | DFCVKFFPEIR        | a                        |
| IP100008283       | Zinc finger protein 106 homolog                  | ATMHLK             | a                        |
| IP100008283       | Zinc finger protein 106 homolog                  | ENEPQMVSPNSLR      | a                        |
| IP100008283       | Zinc finger protein 106 homolog                  | WEKDGNNTR          | a                        |
| IP100005004       | Zinc finger protein 142                          | AFMCEQCGK          | a                        |
| IP100005004       | Zinc finger protein 142                          | KYELQK             | a                        |
| IP100005004       | Zinc finger protein 142                          | QDKEQAEALVLEGR     | a                        |
| IP100005004       | Zinc finger protein 142                          | QKITWHSR           | a                        |
| IP100007825       | Zinc finger protein 214                          | NLSMEK             | c                        |
| IP100019829       | Zinc finger protein 28 homolog                   | EPWMVK             | a                        |
| IP100019829       | Zinc finger protein 28 homolog                   | NFQK               | a                        |
| IP100019829       | Zinc finger protein 28 homolog                   | QDSYAEGVTR         | a                        |
| IP100019829       | Zinc finger protein 28 homolog                   | RGAAASVREPTPLGR    | a                        |
| IP100019829       | Zinc finger protein 28 homolog                   | EVLMLLDNYVR        | a                        |
| IP100307114       | Zinc finger protein 291                          | HEEK               | a                        |
| IP100307114       | Zinc finger protein 291                          | VSLATEATRSK        | a                        |
| IP100008137       | Zinc finger protein 295                          | EAGPSK             | d                        |
| IP100008137       | Zinc finger protein 295                          | FFSPELK            | a                        |
| IP100008137       | Zinc finger protein 295                          | NEAQGK             | a                        |
| IP100336179       | Zinc finger protein 334                          | ENVFGKTLNLMNSVPS   | a                        |
| IP100336179       | Zinc finger protein 334                          | RMNTK              | a                        |
| IP100000110       | Zinc finger protein 337                          | ENPTEDKVLKGIENS    | a                        |
| IP100000110       | Zinc finger protein 337                          | GIENSRWGAFKCAER    | a                        |
| IP100000110       | Zinc finger protein 337                          | RHLREK             | a                        |
| IP100000110       | Zinc finger protein 337                          | RLEQGEVPWGEER      | a                        |
| IP100000110       | Zinc finger protein 337                          | RLEQGEVPWGEERR     | a                        |
| IP100000110       | Zinc finger protein 337                          | SSYNK              | a                        |
| IP100299890       | Zinc finger protein 33A                          | AFYQK              | c                        |

| IPI Accession No. | Protein Description                                                                                                                                            | Peptide Sequence*                | Primary Source Dataset** |
|-------------------|----------------------------------------------------------------------------------------------------------------------------------------------------------------|----------------------------------|--------------------------|
| IP10001008        | Zinc finger protein 341                                                                                                                                        | FRACGCAKGFSR                     | a                        |
| IP10001008        | Zinc finger protein 341                                                                                                                                        | NFDLQQHHR                        | a                        |
| IP10001344        | Zinc finger protein 40                                                                                                                                         | GHQNALPNEK                       | a                        |
| IP10001344        | Zinc finger protein 40                                                                                                                                         | GKVICCECGIR                      | a                        |
| IP10001344        | Zinc finger protein 40                                                                                                                                         | LSTIMEQQISSAAQDK                 | a                        |
| IP10001344        | Zinc finger protein 40                                                                                                                                         | QNTTESSFAVLHSASES                | a                        |
| IP10001344        | Zinc finger protein 40                                                                                                                                         | SSLSKR                           | a                        |
| IP10001344        | Zinc finger protein 40                                                                                                                                         | VAGSSGIWEQTPQIR                  | a                        |
| IP10001344        | Zinc finger protein 40                                                                                                                                         | VGVTGHVPLLER                     | a                        |
| IP100022470       | Zinc finger protein 516                                                                                                                                        | AHMRAHSVVFESDGR                  | a                        |
| IP100022470       | Zinc finger protein 516                                                                                                                                        | APAEAGAEGPSDTK                   | a                        |
| IP100022470       | Zinc finger protein 516                                                                                                                                        | DRREYLVLSQEK                     | a                        |
| IP100022470       | Zinc finger protein 516                                                                                                                                        | EAEMLRRGPSPTR                    | a                        |
| IP100022470       | Zinc finger protein 516                                                                                                                                        | EQDAPAAQGGPPRK                   | a                        |
| IP100022470       | Zinc finger protein 516                                                                                                                                        | LLNGASQADGAR                     | a                        |
| IP100022470       | Zinc finger protein 516                                                                                                                                        | RERDSGDGR                        | a                        |
| IP100056499       | Zinc finger protein 622                                                                                                                                        | ALGWTGSTGAALMRER                 | a                        |
| IP100056499       | Zinc finger protein 622                                                                                                                                        | TGMKNNAKQMHFR                    | a                        |
| IP100058344       | Zinc finger protein 648                                                                                                                                        | ALGSLPSGLAHK                     | d                        |
| IP100385631       | Zinc finger, ZZ-type with EF hand domain                                                                                                                       | EAAAALLTPPCELSVSR                | a                        |
| IP100385631       | Zinc finger, ZZ-type with EF hand domain                                                                                                                       | ITSCCSTPEVELTLAFAL               | a                        |
| IP100385631       | Zinc finger, ZZ-type with EF hand domain                                                                                                                       | KEINALAEHGDLELDER                | a                        |
| IP100385631       | Zinc finger, ZZ-type with EF hand domain                                                                                                                       | MIMFIAR                          | a                        |
| IP100166738       | Zinc-binding alcohol dehydrogenase domain-containing protein 2                                                                                                 | LVPTGAR                          | e                        |
| IP100292181       | Zipper protein kinase                                                                                                                                          | KMSSSPDLLSAALGSR                 | a                        |
| IP100292181       | Zipper protein kinase                                                                                                                                          | REELRHADIR                       | a                        |
| IP100292181       | Zipper protein kinase                                                                                                                                          | SQAEWREEVK                       | a                        |
| IP100179453       | ZNF262 protein                                                                                                                                                 | IFEK                             | a                        |
| IP100179453       | ZNF262 protein                                                                                                                                                 | VRSIK                            | a                        |
| IP100032442       | ZNF554 protein                                                                                                                                                 | EVMLENYR                         | c; e                     |
| IP100016870       | Zona pellucida sperm-binding protein 2                                                                                                                         | GAMDTKGHK                        | a                        |
| IP100402547       | ZUBR1 protein                                                                                                                                                  | SAQTLAGAAGR                      | c                        |
| IP100014849       | [Pyruvate dehydrogenase [lipoamide]] kinase isozyme 3, mitochondrial precursor                                                                                 | HIGSDIPTCNVADVVK                 | b                        |
| IP100382841       | 11 kDa protein                                                                                                                                                 | CMPTFFQFK                        | b; c; d; e               |
| IP100000816       | 14-3-3 protein epsilon                                                                                                                                         | AAFDDAIAELDTLSEESYK              | c; d; e                  |
| IP100000816       | 14-3-3 protein epsilon                                                                                                                                         | AASDIAMTELPPTHPIR                | c; d; e                  |
| IP100000816       | 14-3-3 protein epsilon, similar to epsilon isoform of 14-3-3 protein                                                                                           | LICCDILDVLDK                     | b                        |
| IP100000816       | 14-3-3 protein epsilon, similar to epsilon isoform of 14-3-3 protein                                                                                           | LLCCDILDVLDK, LICCDILDVLDK       | b                        |
| IP100018146       | 14-3-3 protein tau                                                                                                                                             | SICTVLELLDK                      | b                        |
| IP100018146       | 14-3-3 protein tau                                                                                                                                             | YLAEAVCGDDRK                     | b                        |
| IP100794155       | 156 kDa protein; INSR insulin receptor isoform Short precursor; INSR Isoform Short of Insulin receptor precursor; INSR Insulin receptor precursor              | GETLEIGNSYFALDNQNL               | f                        |
| IP100472290       | 160 kDa protein                                                                                                                                                | AAEAERFLQR                       | a                        |
| IP100059135       | 17-kDa PKC-potentiated inhibitory protein of PP1 (PKC-potentiated PP1 inhibitory protein) (Protein phosphatase 1, regulatory, 17-kDa PKC-potentiated)          | GLLKSCKG                         | b                        |
| IP100059135       | 17-kDa PKC-potentiated inhibitory protein of PP1 (PKC-potentiated PP1 inhibitory protein) (Protein phosphatase 1, regulatory, 17-kDa PKC-potentiated)          | SCGKPVEDFIQELAK                  | b                        |
| IP10003482        | 2,4-dienoyl-CoA reductase, mitochondrial precursor                                                                                                             | VHAIQCDVR                        | b                        |
| IP100879204       | 23 kDa protein                                                                                                                                                 | FTTSTHTPGDHQICLHNSSTR            | f; g                     |
| IP100646289       | 25 kDa protein                                                                                                                                                 | AALEVEDIDLK                      | d                        |
| IP100299608       | 26S proteasome non-ATPase regulatory subunit 1                                                                                                                 | CIDHYTK                          | b                        |
| IP100299608       | 26S proteasome non-ATPase regulatory subunit 1                                                                                                                 | SNCKPSTFVAPALPEVK                | b                        |
| IP100012268       | 26S proteasome non-ATPase regulatory subunit 2                                                                                                                 | LALMLNDMELVEDIFTSCK              | b                        |
| IP100646556       | 28 kDa protein                                                                                                                                                 | AAAVLPVLDLAQR                    | d; e                     |
| IP100478292       | 285 kDa protein                                                                                                                                                | AALLELWELR                       | c; d                     |
| IP100011276       | 2-oxoisovalerate dehydrogenase beta subunit, mitochondrial precursor                                                                                           | CIEDK                            | b                        |
| IP100011276       | 2-oxoisovalerate dehydrogenase beta subunit, mitochondrial precursor                                                                                           | VCGYDTPHFHPEFYIPDK               | b                        |
| IP100297440       | 3',5'-cyclic nucleotide phosphodiesterase 10A2, splice isoform PDE10A2 of Q9Y233 cAMP and cAMP-inhibited GMP 3',5'-cyclic phosphodiesterase                    | CALFQVDHK                        | b                        |
| IP100297440       | 3',5'-cyclic nucleotide phosphodiesterase 10A2, splice isoform PDE10A2 of Q9Y233 cAMP and cAMP-inhibited GMP 3',5'-cyclic phosphodiesterase                    | HSECTYR                          | b                        |
| IP100297440       | 3',5'-cyclic nucleotide phosphodiesterase 10A2, splice isoform PDE10A2 of Q9Y233 cAMP and cAMP-inhibited GMP 3',5'-cyclic phosphodiesterase                    | NILCMPIYSR                       | b                        |
| IP100873890       | 30 kDa protein                                                                                                                                                 | FTPPVNVNTWLR                     | f; g                     |
| IP100295111       | 3-Hydroxyisobutyl-coenzyme A hydrolase, isoform 1                                                                                                              | LSQACMR                          | b                        |
| IP100012828       | 3-ketoacyl-CoA thiolase, peroxisomal precursor, similar to acetyl-coenzyme A acyltransferase 1                                                                 | VNPLGGAVALGHPLGCTGAR             | b                        |
| IP100642725       | 40 kDa protein                                                                                                                                                 | AAPEASGTSSDVAYSR                 | d                        |
| IP100012493       | 40S ribosomal protein S20                                                                                                                                      | KTPCGEGSK                        | b                        |
| IP100395947       | 4-aminobutyrate aminotransferase precursor                                                                                                                     | HGCAFLVDEYQTGGGCTGK              | b                        |
| IP100395947       | 4-aminobutyrate aminotransferase precursor                                                                                                                     | KHGCAFLVDEYQTGGGCTGK             | b                        |
| IP100395947       | 4-aminobutyrate aminotransferase precursor                                                                                                                     | NKGVVLGGCDK                      | b                        |
| IP100395947       | 4-aminobutyrate aminotransferase precursor                                                                                                                     | TMGLATTHSK                       | b                        |
| IP100746934       | 574 kDa protein                                                                                                                                                | AAPPPPPPPPLESSPR                 | e                        |
| IP100295392       | 60S ribosomal protein L3, 60S ribosomal protein L3-like, similar to ribosomal protein L3                                                                       | VACIGAWHPAR                      | b                        |
| IP100027996       | 70 kDa WD-repeat tumor rejection antigen homolog                                                                                                               | VFLYELLPEPFLCNSFTSPDPHK          | b                        |
| IP100022895       | A1BG Alpha-1B-glycoprotein precursor                                                                                                                           | AESESLKPLANVTLTCQAR              | g                        |
| IP100022895       | A1BG Alpha-1B-glycoprotein precursor                                                                                                                           | AIFYEQPSLWAESESLKPLANVTLTCQAR    | g                        |
| IP100022895       | A1BG Alpha-1B-glycoprotein precursor                                                                                                                           | EGDHEFLVPEAQEDVEATFPVHPQGNVSCSVR | g                        |
| IP100739539       | A2M Alpha-2-macroglobulin precursor                                                                                                                            | IWHHTFYNELR                      | f; g                     |
| IP100478003       | A2M Alpha-2-macroglobulin precursor                                                                                                                            | EVPSVPEHR                        | g                        |
| IP100478003       | A2M Alpha-2-macroglobulin precursor                                                                                                                            | FTVLQDVPYR                       | f                        |
| IP100478003       | A2M Alpha-2-macroglobulin precursor                                                                                                                            | GCVLLSYLNETVTVSASLESVR           | f; g                     |
| IP100478003       | A2M Alpha-2-macroglobulin precursor                                                                                                                            | IYVLDVYLNQQLTPEVK                | f; g                     |
| IP100478003       | A2M Alpha-2-macroglobulin precursor                                                                                                                            | SLGNVNTVSAEALLESQELCGTEVPSVPEHGR | f; g                     |
| IP100478003       | A2M Alpha-2-macroglobulin precursor                                                                                                                            | YSNQTLSLFFTVLQDVPYR              | f                        |
| IP100478003       | A2M Alpha-2-macroglobulin precursor                                                                                                                            | QNMVFLAPNIVLDYLNQQLTPEVK         | f                        |
| IP100002230       | AADACL1 arylacetamide deacetylase-like 1                                                                                                                       | LNWTSLLPASFTK                    | f; g                     |
| IP100414303       | ABCA2 ATP-binding cassette, sub-family A, member 2 isoform b                                                                                                   | DEFGLOYANSTVQLLER                | f; g                     |
| IP100873899       | ABCF1 Isoform 1 of ATP-binding cassette sub-family F member 1                                                                                                  | KAEQGESEEGEKEEEEGESK             | b                        |
| IP101013991       | ABLIM2 Uncharacterized protein; ABLIM2 Uncharacterized protein; ABLIM2 Uncharacterized protein; ABLIM2 Uncharacterized protein; ABLIM2 Uncharacterized protein | TSSSHSVPASSTGSPSR                | h                        |
| IP100793748       | ACAN 239 kDa protein; ACAN Isoform 3 of Aggrecan core protein precursor; ACAN Isoform 2 of Aggrecan core protein precursor                                     | TVYVHANQTYGDDPSR                 | f; g                     |
| IP100216489       | ACAN Isoform 2 of Aggrecan core protein precursor; ACAN aggregran isoform 2 precursor                                                                          | TVYLYPNQTLGDDPLSR                | f; g                     |
| IP100437751       | ACE Isoform Somatic-1 of Angiotensin-converting enzyme, somatic isoform precursor                                                                              | KFDVNLQNTTIK                     | f; g                     |
| IP100877100       | ACE Isoform Somatic-2 of Angiotensin-converting enzyme, somatic isoform precursor; ACE Isoform Somatic-1 of Angiotensin-converting enzyme                      | ELYEPIWQNTDPQLR                  | f; g                     |
| IP100386719       | Acetolactate synthase, Acetolactate synthase homolog                                                                                                           | VLHDAQCCR                        | b                        |
| IP100021440       | ACTG1 Actin, cytoplasmic 2                                                                                                                                     | AVFPIVGR                         | f; g                     |
| IP100021440       | ACTG1 Actin, cytoplasmic 2                                                                                                                                     | ELPDGQVITIGNER                   | f; g                     |
| IP100021440       | ACTG1 Actin, cytoplasmic 2; ACTB Actin, cytoplasmic 1                                                                                                          | HHTFYNELR                        | f; g                     |
| IP100021440       | ACTG1 Actin, cytoplasmic 2; ACTB Actin, cytoplasmic 1                                                                                                          | TTGIVMDSGDGVTHIVPIYEGYALPHAILR   | d; e; f; g               |
| IP100032958       | Actin binding protein anillin                                                                                                                                  | INLANCTSR                        | b                        |
| IP100005159       | Actin-like protein 2                                                                                                                                           | CGYAGSNFFEHFFALVGR               | b                        |
| IP100005159       | Actin-like protein 2                                                                                                                                           | CGYAGSNFFEHFFALVGRPIR            | b                        |
| IP100028091       | Actin-like protein 3                                                                                                                                           | TLTGTVDSGDGVTHIVPIYAEVYIGSCIK    | b                        |

| IPI Accession No. | Protein Description                                                                                                                            | Peptide Sequence*           | Primary Source Dataset** |
|-------------------|------------------------------------------------------------------------------------------------------------------------------------------------|-----------------------------|--------------------------|
| IPI00013897       | ADAM 10 precursor                                                                                                                              | FSLCSIR                     | b                        |
| IPI00013897       | ADAM 10 precursor                                                                                                                              | GYCDVEMR                    | b                        |
| IPI0079448        | ADAM10 Uncharacterized protein ADAM10; ADAM10 ADAM 10 precursor                                                                                | NISQVLEK                    | f; g                     |
| IPI00220635       | ADAM22 Isoform 5 of ADAM 22 precursor; ADAM22 Isoform 2 of ADAM 22 precursor; ADAM22 Isoform 1 of ADAM 22 precursor                            | TLNCSGGHYK                  | f; g                     |
| IPI00307276       | ADAMT54 ADAMT54-4 precursor                                                                                                                    | EEEIFVPEKLNGLSVLPFGSAPAR    | g                        |
| IPI00333383       | Adapter-related protein complex 2 beta 1 subunit.Similar to adaptor-related protein complex 2, beta 1 subunit                                  | KTAAVCVAK                   | b                        |
| IPI00220158       | ADD1 Isoform 3 of Alpha-adducin; ADD1 Isoform 1 of Alpha-adducin                                                                               | SPGSPVGEGTGSPPK             | h                        |
| IPI00019904       | ADD2.LOC440354 Isoform 1 of Beta-adducin                                                                                                       | KLELDGKETAPEEPPGSPAK        | b                        |
| IPI00019904       | ADD2.LOC440354 Isoform 1 of Beta-adducin                                                                                                       | SAPASPVQSPAK                | h                        |
| IPI00019904       | ADD2.LOC440354 Isoform 1 of Beta-adducin                                                                                                       | SAPASPVQSPAKEATK            | h                        |
| IPI00019904       | ADD2.LOC440354 Isoform 1 of Beta-adducin                                                                                                       | SEETVPEAASPPPPQGPYFDR       | h                        |
| IPI00019904       | ADD2.LOC440354 Isoform 1 of Beta-adducin                                                                                                       | SPLVSPKSLLEGTK              | h                        |
| IPI00220754       | ADD3 Isoform 1 of Gamma-adducin; ADD3 Isoform 2 of Gamma-adducin                                                                               | VNVPEESRNGEISPR             | h                        |
| IPI00018342       | Adenylate kinase isoenzyme 1                                                                                                                   | KVNAEGSDVSVFVQVCTHLDALK     | b                        |
| IPI00018342       | Adenylate kinase isoenzyme 1                                                                                                                   | VNAEGSDVSVFVQVCTHLDALK      | b                        |
| IPI00008274       | adenylate cyclase-associated protein,,similar to Adenylate cyclase-associated protein 1 (CAP 1)                                                | TDGCHAVLSK                  | b                        |
| IPI00012347       | Adican                                                                                                                                         | AAANARITGTSPPR              | a                        |
| IPI00022891       | ADP.ATP carrier protein, heart/skeletal muscle isoform T1                                                                                      | EFHGLGDCHIK                 | b                        |
| IPI00022891       | ADP.ATP carrier protein, heart/skeletal muscle isoform T1                                                                                      | YFAGNLASGGAAGATSLCFVYPLDFAR | b                        |
| IPI00291467       | ADP.ATP carrier protein, liver isoform T2                                                                                                      | GIVDCIVR                    | b                        |
| IPI00291467       | ADP.ATP carrier protein, liver isoform T2                                                                                                      | GLGDCLVK                    | b; d                     |
| IPI00019943       | AFM Afamina precursor                                                                                                                          | YAEKFNTEEK                  | g                        |
| IPI00032220       | AGT Angiotensinogen precursor                                                                                                                  | AVYDQSATALHFLGR             | g                        |
| IPI00032220       | AGT Angiotensinogen precursor                                                                                                                  | HLVIHNESTCEQLAK             | f; g                     |
| IPI00032220       | AGT Angiotensinogen precursor                                                                                                                  | LQAILGVPWVKDKNCTSR          | g                        |
| IPI00032220       | AGT Angiotensinogen precursor                                                                                                                  | VYIHPHLVII                  | g                        |
| IPI00032220       | AGT Angiotensinogen precursor                                                                                                                  | VYIHPHLVIHNESTCEQLAK        | f; g                     |
| IPI00032220       | AGT Angiotensinogen precursor                                                                                                                  | HLVIHNEST                   | f; g                     |
| IPI00032220       | AGT Angiotensinogen precursor                                                                                                                  | HLVIHNESTCEQL               | f; g                     |
| IPI00032220       | AGT Angiotensinogen precursor                                                                                                                  | VYIHPFH                     | f; g                     |
| IPI00022431       | AHSG Alpha-2-HS-glycoprotein precursor                                                                                                         | AALAFAFNQNGSNFQLEEISR       | f; g                     |
| IPI00022431       | AHSG Alpha-2-HS-glycoprotein precursor                                                                                                         | AFNAQNGSNFQLEEISR           | g                        |
| IPI00022431       | AHSG Alpha-2-HS-glycoprotein precursor                                                                                                         | NNGSNFQLEEISR               | g                        |
| IPI00022431       | AHSG Alpha-2-HS-glycoprotein precursor                                                                                                         | VCQDPLLAPLNDTR              | g                        |
| IPI00022431       | AHSG Alpha-2-HS-glycoprotein precursor                                                                                                         | NAQNGSNFQLEEISR             | g                        |
| IPI00022431       | AHSG Alpha-2-HS-glycoprotein precursor                                                                                                         | PLLAPLNDTR                  | g                        |
| IPI00022431       | AHSG Alpha-2-HS-glycoprotein precursor                                                                                                         | TVVQPSGAAAGVPPVPCGR         | g                        |
| IPI00940222       | AKAP12 Isoform 3 of A-kinase anchor protein 12; AKAP12 Isoform 2 of A-kinase anchor protein 12; AKAP12 Isoform 1 of A-kinase anchor protein 12 | LKETCVSGEDPTQGAADSLPDEK     | h                        |
| IPI00940222       | AKAP12 Isoform 3 of A-kinase anchor protein 12; AKAP12 Isoform 2 of A-kinase anchor protein 12; AKAP12 Isoform 1 of A-kinase anchor protein 12 | RGSSDEEGGPK                 | h                        |
| IPI00940222       | AKAP12 Isoform 3 of A-kinase anchor protein 12; AKAP12 Isoform 2 of A-kinase anchor protein 12; AKAP12 Isoform 1 of A-kinase anchor protein 12 | RPSESDKEDLDKVK              | h                        |
| IPI00940222       | AKAP12 Isoform 3 of A-kinase anchor protein 12; AKAP12 Isoform 2 of A-kinase anchor protein 12; AKAP12 Isoform 1 of A-kinase anchor protein 12 | SAESPTSPVISETGSTFK          | h                        |
| IPI00745872       | ALB Isoform 1 of Serum albumin precursor                                                                                                       | AAADPHECYAK                 | g                        |
| IPI00745872       | ALB Isoform 1 of Serum albumin precursor                                                                                                       | ADDKETCAEEGKK               | g                        |
| IPI00745872       | ALB Isoform 1 of Serum albumin precursor                                                                                                       | ADPHECYAK                   | g                        |
| IPI00745872       | ALB Isoform 1 of Serum albumin precursor                                                                                                       | CASLQK                      | a                        |
| IPI00745872       | ALB Isoform 1 of Serum albumin precursor                                                                                                       | DDFAAFVEK                   | g                        |
| IPI00745872       | ALB Isoform 1 of Serum albumin precursor                                                                                                       | DLPSLAADFVESK               | g                        |
| IPI00745872       | ALB Isoform 1 of Serum albumin precursor                                                                                                       | DPHECYAK                    | g                        |
| IPI00745872       | ALB Isoform 1 of Serum albumin precursor                                                                                                       | DVFLGMFL                    | a                        |
| IPI00745872       | ALB Isoform 1 of Serum albumin precursor                                                                                                       | EFNAETTFHA                  | g                        |
| IPI00745872       | ALB Isoform 1 of Serum albumin precursor                                                                                                       | ELFEQLGEYK                  | g                        |
| IPI00745872       | ALB Isoform 1 of Serum albumin precursor                                                                                                       | EMPADLPSLAADFVESK           | g                        |
| IPI00745872       | ALB Isoform 1 of Serum albumin precursor                                                                                                       | ETYGEMADCCAK                | c; d                     |
| IPI00745872       | ALB Isoform 1 of Serum albumin precursor                                                                                                       | FQNALLVR                    | a; d; e; g               |
| IPI00745872       | ALB Isoform 1 of Serum albumin precursor                                                                                                       | HDNEETFLK                   | g                        |
| IPI00745872       | ALB Isoform 1 of Serum albumin precursor                                                                                                       | HDNEETFLKK                  | g                        |
| IPI00745872       | ALB Isoform 1 of Serum albumin precursor                                                                                                       | HTLFGDK                     | g                        |
| IPI00745872       | ALB Isoform 1 of Serum albumin precursor                                                                                                       | KVPQVSTIPLVEVSR             | d                        |
| IPI00745872       | ALB Isoform 1 of Serum albumin precursor                                                                                                       | LEVDETVYVK                  | d                        |
| IPI00745872       | ALB Isoform 1 of Serum albumin precursor                                                                                                       | LHTLFGDK                    | g                        |
| IPI00745872       | ALB Isoform 1 of Serum albumin precursor                                                                                                       | LSQRFPKAEFAEVSK             | g                        |
| IPI00745872       | ALB Isoform 1 of Serum albumin precursor                                                                                                       | NECFLQHKDDNPNLPR            | g                        |
| IPI00745872       | ALB Isoform 1 of Serum albumin precursor                                                                                                       | PFEDHVK                     | g                        |
| IPI00745872       | ALB Isoform 1 of Serum albumin precursor                                                                                                       | QEPERNECFLOHK               | d; g                     |
| IPI00745872       | ALB Isoform 1 of Serum albumin precursor                                                                                                       | QIKKQATALVELVK              | g                        |
| IPI00745872       | ALB Isoform 1 of Serum albumin precursor                                                                                                       | QNCLEFQLGEYK                | c; d; g                  |
| IPI00745872       | ALB Isoform 1 of Serum albumin precursor                                                                                                       | QTALVELVK                   | c                        |
| IPI00745872       | ALB Isoform 1 of Serum albumin precursor                                                                                                       | RPCFSALVEDEVYVVK            | a                        |
| IPI00745872       | ALB Isoform 1 of Serum albumin precursor                                                                                                       | SALEVDEVYVVK                | d                        |
| IPI00745872       | ALB Isoform 1 of Serum albumin precursor                                                                                                       | TLFGDK                      | g                        |
| IPI00745872       | ALB Isoform 1 of Serum albumin precursor                                                                                                       | YICENQDSISSK                | c; d; g                  |
| IPI00745872       | ALB Isoform 1 of Serum albumin precursor                                                                                                       | AQYLQCCPFEDHVK              | d                        |
| IPI00745872       | ALB Isoform 1 of Serum albumin precursor                                                                                                       | DNEETFLK                    | d                        |
| IPI00745872       | ALB Isoform 1 of Serum albumin precursor                                                                                                       | FAQYLQCCPFEDHVK             | d                        |
| IPI00745872       | ALB Isoform 1 of Serum albumin precursor                                                                                                       | HKDDNPNLPR                  | d                        |
| IPI00745872       | ALB Isoform 1 of Serum albumin precursor                                                                                                       | LCTVATLR                    | d                        |
| IPI00745872       | ALB Isoform 1 of Serum albumin precursor                                                                                                       | LDELRDGK                    | d                        |
| IPI00745872       | ALB Isoform 1 of Serum albumin precursor                                                                                                       | LDELRDGKASSAK               | d                        |
| IPI00745872       | ALB Isoform 1 of Serum albumin precursor                                                                                                       | TAFHDNEETFLK                | d                        |
| IPI00022434       | ALB Uncharacterized protein ALB                                                                                                                | AEVENDEMPADLPSLAADFVESK     | g                        |
| IPI00022434       | ALB Uncharacterized protein ALB                                                                                                                | CIAEVENDEMPADLPSLAADFVESK   | g                        |
| IPI00022434       | ALB Uncharacterized protein ALB                                                                                                                | DEMPADLPSLAADFVESK          | g                        |
| IPI00022434       | ALB Uncharacterized protein ALB                                                                                                                | DVFLGMFLYEVAR               | a; f; g                  |
| IPI00022434       | ALB Uncharacterized protein ALB                                                                                                                | ENDEMPADLPSLAADFVESK        | g                        |
| IPI00022434       | ALB Uncharacterized protein ALB                                                                                                                | ENQDSISSK                   | g                        |
| IPI00022434       | ALB Uncharacterized protein ALB                                                                                                                | EQLGEYK                     | d                        |
| IPI00022434       | ALB Uncharacterized protein ALB                                                                                                                | FHDNEETFLK                  | g                        |
| IPI00022434       | ALB Uncharacterized protein ALB                                                                                                                | FYAPELLFFAK                 | g                        |
| IPI00022434       | ALB Uncharacterized protein ALB                                                                                                                | HCIAEVENDEMPADLPSLAADFVESK  | g                        |
| IPI00022434       | ALB Uncharacterized protein ALB                                                                                                                | HPDYSVLLLR                  | d                        |
| IPI00022434       | ALB Uncharacterized protein ALB                                                                                                                | IAEVENDEMPADLPSLAADFVESK    | f; g                     |
| IPI00022434       | ALB Uncharacterized protein ALB                                                                                                                | LPSLAADFVESK                | g                        |
| IPI00022434       | ALB Uncharacterized protein ALB                                                                                                                | LVEIAR                      | g                        |
| IPI00022434       | ALB Uncharacterized protein ALB                                                                                                                | PADLPSLAADFVESK             | g                        |
| IPI00022434       | ALB Uncharacterized protein ALB                                                                                                                | PELLFFAK                    | g                        |
| IPI00022434       | ALB Uncharacterized protein ALB                                                                                                                | PSLAADFVESK                 | g                        |
| IPI00022434       | ALB Uncharacterized protein ALB                                                                                                                | SHCIAEVENDEMPADLPSLAADFVESK | g                        |

| IPI Accession No. | Protein Description                                                                                                                                                        | Peptide Sequence*               | Primary Source Dataset** |
|-------------------|----------------------------------------------------------------------------------------------------------------------------------------------------------------------------|---------------------------------|--------------------------|
| IP100022434       | ALB Uncharacterized protein ALB                                                                                                                                            | EVENDMPADLPSLAADFVESK           | g                        |
| IP100022434       | ALB Uncharacterized protein ALB                                                                                                                                            | RHPDYSVLLLR                     | g                        |
| IP100022434       | ALB Uncharacterized protein ALB                                                                                                                                            | YTKKVPQVSTPILVEVSR              | g                        |
| IP100795504       | ALCAM 62 kDa protein; ALCAM Isoform 1 of CD166 antigen precursor                                                                                                           | EGDNITLK                        | f; g                     |
| IP100795504       | ALCAM 62 kDa protein; ALCAM Isoform 1 of CD166 antigen precursor                                                                                                           | HIISPEENVLTCTAENQLER            | f; g                     |
| IP100795504       | ALCAM 62 kDa protein; ALCAM Isoform 1 of CD166 antigen precursor                                                                                                           | LNLSNEYTSLSINAR                 | f; g                     |
| IP100807403       | ALCAM Isoform 2 of CD166 antigen precursor                                                                                                                                 | NAFVVMK                         | f; g                     |
| IP100807403       | ALCAM Isoform 2 of CD166 antigen precursor                                                                                                                                 | SENYTSLSINARISDEKR              | f; g                     |
| IP100218914       | Aldehyde dehydrogenase 1A1                                                                                                                                                 | IGPALSCTNTVVKPAEQITPLTALHVASLIK | b                        |
| IP100218914       | Aldehyde dehydrogenase 1A1                                                                                                                                                 | KFPVFNPAEEELCQVEEGDKEDVDK       | b                        |
| IP100336008       | Aldehyde dehydrogenase 5A1 precursor isoform 1.Succinate semialdehyde dehydrogenase, mitochondrial precursor                                                               | AAVEAFCR                        | b; c; d                  |
| IP100336008       | Aldehyde dehydrogenase 5A1 precursor isoform 1.Succinate semialdehyde dehydrogenase, mitochondrial precursor                                                               | EVGEAICTDPLVSK                  | b                        |
| IP100336008       | Aldehyde dehydrogenase 5A1 precursor isoform 1.Succinate semialdehyde dehydrogenase, mitochondrial precursor                                                               | NFFEFTLLCNVTQDMLCTHEETGFLAPVIK  | b                        |
| IP100336008       | Aldehyde dehydrogenase 5A1 precursor isoform 1.Succinate semialdehyde dehydrogenase, mitochondrial precursor                                                               | VADCGVR                         | b                        |
| IP10006663        | Aldehyde dehydrogenase, mitochondrial precursor                                                                                                                            | AAFQLGSPWR                      | d                        |
| IP10006663        | Aldehyde dehydrogenase, mitochondrial precursor                                                                                                                            | LLCGGGAADR                      | b                        |
| IP100220271       | aldo-keto reductase family 1, member A1                                                                                                                                    | HIDCAIYGNPEIGEALKEDVGGPK        | b                        |
| IP100220271       | aldo-keto reductase family 1, member A1                                                                                                                                    | KVICIPK                         | b                        |
| IP100220271       | aldo-keto reductase family 1, member A1                                                                                                                                    | NADGTCYDSTHYK                   | b                        |
| IP100022429       | Alpha-1-acid glycoprotein 1 precursor                                                                                                                                      | DKCEPLEK                        | b                        |
| IP100029468       | Alpha-centractin.Beta-centractin                                                                                                                                           | YCFPNVYGR                       | b                        |
| IP100029468       | Alpha-centractin.Beta-centractin                                                                                                                                           | YCFPNVYGRPK                     | b                        |
| IP100001453       | Alpha-internexin                                                                                                                                                           | ARCEEER                         | b                        |
| IP100001453       | Alpha-internexin                                                                                                                                                           | CEEESR                          | b                        |
| IP100328156       | Amine oxidase [flavin-containing] B                                                                                                                                        | KICELYAK                        | b                        |
| IP100020012       | Amyloid-like protein 1 precursor                                                                                                                                           | AALEGFLAALQADPPQAE              | f                        |
| IP100873803       | AMZ2 Uncharacterized protein ENSP0000376482; AMZ2 Archaemetzincin-2                                                                                                        | IQSIGSLGNTNR                    | f                        |
| IP100873803       | AMZ2 Uncharacterized protein ENSP0000376482; AMZ2 Archaemetzincin-2                                                                                                        | RSIYIQSIGSLGNTNR                | f                        |
| IP100477896       | Anchor protein                                                                                                                                                             | AAAAAAFEIDPR                    | a                        |
| IP100074962       | ANK2 Isoform 3 of Ankyrin-2                                                                                                                                                | HTGSGEDESQVPLVTSESR             | h                        |
| IP100074962       | ANK2 Isoform 3 of Ankyrin-2; ANK2 Isoform 1 of Ankyrin-2                                                                                                                   | EESNDQEEDIDMTEK                 | h                        |
| IP100074962       | ANK2 Isoform 3 of Ankyrin-2; ANK2 Isoform 1 of Ankyrin-2                                                                                                                   | GGSPIQEPEEPIHREESSPR            | h                        |
| IP100074962       | ANK2 Isoform 3 of Ankyrin-2; ANK2 Isoform 1 of Ankyrin-2                                                                                                                   | MADEQGDMLQSPDRK                 | h                        |
| IP100887214       | ANKRD18A similar to hCG2010820, partial                                                                                                                                    | EGNTPLFAINSR                    | g                        |
| IP100074962       | Ankyrin 2 isoform 1                                                                                                                                                        | AAEEEPGEFFIEVER                 | e                        |
| IP100478210       | Ankyrin 3 isoform 1                                                                                                                                                        | AAALLQDNNADVSEK                 | a                        |
| IP100002459       | annexin VI isoform 2,Annexin A6                                                                                                                                            | MRPPAYCDK                       | b                        |
| IP100002459       | annexin VI isoform 2,Annexin A6                                                                                                                                            | QRQEVQSYK                       | b                        |
| IP100221224       | ANPEP Aminopeptidase N                                                                                                                                                     | AEFNTLHPK                       | f; g                     |
| IP100221224       | ANPEP Aminopeptidase N                                                                                                                                                     | YPTVTLANLNTFLIEER               | f; g                     |
| IP100221226       | ANXA6 Annexin A6                                                                                                                                                           | EAILDIITSR                      | d                        |
| IP100926648       | APEH Uncharacterized protein; APEH Acylamino-acid-releasing enzyme                                                                                                         | ALDVSASDDEIAR                   | h                        |
| IP100607600       | APLP1 amyloid precursor-like protein 1 isoform 1 precursor; APLP1 Amyloid-like protein 1 precursor                                                                         | VNQLGILLDQNP                    | g                        |
| IP100020012       | APLP1 Amyloid-like protein 1 precursor                                                                                                                                     | AALEGFLAALQADPPQAE              | a                        |
| IP100020012       | APLP1 Amyloid-like protein 1 precursor                                                                                                                                     | GFPFHSIEIQ                      | g                        |
| IP100020012       | APLP1 Amyloid-like protein 1 precursor                                                                                                                                     | VEGADEEEESFPQVD                 | g                        |
| IP100020012       | APLP1 Amyloid-like protein 1 precursor                                                                                                                                     | VNQLGILLDQNPFLAQELRPQIQ         | g                        |
| IP100020012       | APLP1 Amyloid-like protein 1 precursor                                                                                                                                     | VNQLGILLDQNPFLAQELR             | g                        |
| IP100022229       | APOB Apolipoprotein B-100 precursor                                                                                                                                        | FEVDSPVNATWSASLK                | f                        |
| IP100022229       | APOB Apolipoprotein B-100 precursor                                                                                                                                        | GISALLVPPEEAK                   | f                        |
| IP100006662       | APOD Apolipoprotein D precursor                                                                                                                                            | ADGTVNQEIEGA                    | f                        |
| IP100006662       | APOD Apolipoprotein D precursor                                                                                                                                            | ADGTVNQEIEGATP                  | f                        |
| IP100006662       | APOD Apolipoprotein D precursor                                                                                                                                            | ADGTVNQEIEGATPVNLTE             | g                        |
| IP100006662       | APOD Apolipoprotein D precursor                                                                                                                                            | ADGTVNQEIEGATPVNLTEPAK          | f; g                     |
| IP100006662       | APOD Apolipoprotein D precursor                                                                                                                                            | ADGTVNQEIEGATPVNLTEPAKLEVK      | f; g                     |
| IP100006662       | APOD Apolipoprotein D precursor                                                                                                                                            | ATPVNLTEPAK                     | f                        |
| IP100006662       | APOD Apolipoprotein D precursor                                                                                                                                            | CIQANYSLMENK                    | f; g                     |
| IP100006662       | APOD Apolipoprotein D precursor                                                                                                                                            | EATPVNLTEPAKLEVK                | f                        |
| IP100006662       | APOD Apolipoprotein D precursor                                                                                                                                            | EPKLEVK                         | f                        |
| IP100006662       | APOD Apolipoprotein D precursor                                                                                                                                            | GEATPVNLTEPAK                   | g                        |
| IP100006662       | APOD Apolipoprotein D precursor                                                                                                                                            | GTVNQEIEGATPVNLTEPAKLEVK        | g                        |
| IP100006662       | APOD Apolipoprotein D precursor                                                                                                                                            | PVNLTEPAK                       | g                        |
| IP100006662       | APOD Apolipoprotein D precursor                                                                                                                                            | QIEGATPVNLTEPAK                 | g                        |
| IP100006662       | APOD Apolipoprotein D precursor                                                                                                                                            | QIEGATPVNLTEPAKLEVK             | g                        |
| IP100006662       | APOD Apolipoprotein D precursor                                                                                                                                            | TPVNLTEPAK                      | g                        |
| IP100006662       | APOD Apolipoprotein D precursor                                                                                                                                            | TPVNLTEPAKLEVK                  | g                        |
| IP100006662       | APOD Apolipoprotein D precursor                                                                                                                                            | TVNQEIEGATPVNLTEPAK             | g                        |
| IP100006662       | APOD Apolipoprotein D precursor                                                                                                                                            | TVNQEIEGATPVNLTEPAKLEVK         | g                        |
| IP100006662       | APOD Apolipoprotein D precursor                                                                                                                                            | IQANYSLMENK                     | g                        |
| IP100006662       | APOD Apolipoprotein D precursor                                                                                                                                            | RADGTVNQEIEGATPVNLTEPAK         | g                        |
| IP100006662       | APOD Apolipoprotein D precursor                                                                                                                                            | RADGTVNQEIEGATPVNLTEPAKLEVK     | g                        |
| IP100021842       | APOE Apolipoprotein E precursor                                                                                                                                            | SEQVQELLSSQVQELR                | g                        |
| IP100021842       | APOE Apolipoprotein E precursor                                                                                                                                            | SLAGQQLQER                      | g                        |
| IP100298828       | APOH Beta-2-glycoprotein 1 precursor                                                                                                                                       | LGNSWAMPSCK                     | g                        |
| IP100298828       | APOH Beta-2-glycoprotein 1 precursor                                                                                                                                       | VYKPSAGNSLYR                    | g                        |
| IP100021842       | Apolipoprotein E precursor                                                                                                                                                 | AATVGLSAGQPLQER                 | d; g                     |
| IP10055567        | AQP4 Aquaporin 4 isoform a variant (Fragment)                                                                                                                              | GSYMEVDNR                       | d; c; h                  |
| IP100941730       | ARHGAP1 cDNA FLJ60782, highly similar to Rho-GTPase-activating protein 1                                                                                                   | SDDSKSSPELVTHLK                 | h                        |
| IP100014232       | ARL-6 interacting protein-1                                                                                                                                                | FHEICSNLVK                      | b                        |
| IP100418446       | ASAH1 N-acylphosphingosine amidohydrolase (acid ceramidase) 1 isoform b                                                                                                    | TVLENSTSYEAK                    | f; g                     |
| IP100418446       | ASAH1 N-acylphosphingosine amidohydrolase (acid ceramidase) 1 isoform b; ASAH1 ASAH1 protein; ASAH1 Acid ceramidase precursor                                              | ILAPAYFLGGNQSGEGCVTR            | f; g                     |
| IP100215844       | ASAH1 Isoform 2 of N-acylphosphingosine amidohydrolase (acid ceramidase) 1 isoform b; ASAH1 Isoform 3 of N-acylphosphingosine amidohydrolase (acid ceramidase) 1 isoform b | FNVSLDSVPELR                    | f; g                     |
| IP100306960       | Asparaginyl-tRNA synthetase, cytoplasmic                                                                                                                                   | CPEDSR                          | b                        |
| IP100306960       | Asparaginyl-tRNA synthetase, cytoplasmic                                                                                                                                   | YGTCPHGGYGLGLER                 | b                        |
| IP100219029       | Aspartate aminotransferase, cytoplasmic                                                                                                                                    | TDDCHPWVLPVVK                   | b; c; d                  |
| IP100305626       | Aspartate beta-hydroxylase domain-containing protein 1                                                                                                                     | CGPTNAR                         | b                        |
| IP100305626       | Aspartate beta-hydroxylase domain-containing protein 1                                                                                                                     | CHLGLK                          | b                        |
| IP100216951       | Asparlyl-tRNA synthetase                                                                                                                                                   | IGSCTQDVELHVOK                  | b                        |
| IP100216951       | Asparlyl-tRNA synthetase                                                                                                                                                   | LEYCEALMLR                      | b                        |
| IP100294834       | ASPH Asparlyl/asparaginyl beta-hydroxylase                                                                                                                                 | LVQLFPDTSLK                     | f; g                     |
| IP100433478       | ASPH ASPH protein                                                                                                                                                          | YNLSEVLQKK                      | f                        |
| IP100014850       | Astrocytic phosphoprotein PEA-15                                                                                                                                           | SACKEDIPSEK                     | b                        |
| IP100788782       | ATP1A3 Uncharacterized protein; ATP1A3 Sodium/potassium-transporting ATPase subunit alpha-3                                                                                | GDKKDDKSPK                      | h                        |
| IP100788782       | ATP1A3 Uncharacterized protein; ATP1A3 Sodium/potassium-transporting ATPase subunit alpha-3                                                                                | GDKKDDKSPK                      | h                        |
| IP100871221       | ATP1B1 Isoform 2 of Sodium/potassium-transporting ATPase subunit beta-1; ATP1B1 Isoform 1 of Sodium/potassium-transporting ATPase subunit beta-1                           | GDKPKIHK                        | f; g                     |
| IP100871221       | ATP1B1 Isoform 2 of Sodium/potassium-transporting ATPase subunit beta-1; ATP1B1 Isoform 1 of Sodium/potassium-transporting ATPase subunit beta-1                           | EWLGNCSGLNDETYGK                | f; g                     |
| IP100871221       | ATP1B1 Isoform 2 of Sodium/potassium-transporting ATPase subunit beta-1; ATP1B1 Isoform 1 of Sodium/potassium-transporting ATPase subunit beta-1                           | FKLEWGNCSGLNDETYGK              | f; g                     |



| IPI Accession No. | Protein Description                                                                                                                                                 | Peptide Sequence*               | Primary Source Dataset** |
|-------------------|---------------------------------------------------------------------------------------------------------------------------------------------------------------------|---------------------------------|--------------------------|
| IP00871221        | ATP1B1 Isoform 2 of Sodium/potassium-transporting ATPase subunit beta-1; ATP1B1 Isoform 1 of Sodium/potassium-transporting ATPase subunit beta-1                    | GLNDETYGK                       | f; g                     |
| IP00871221        | ATP1B1 Isoform 2 of Sodium/potassium-transporting ATPase subunit beta-1; ATP1B1 Isoform 1 of Sodium/potassium-transporting ATPase subunit beta-1                    | LAQVFNLTMDTEIR                  | f; g                     |
| IP00871221        | ATP1B1 Isoform 2 of Sodium/potassium-transporting ATPase subunit beta-1; ATP1B1 Isoform 1 of Sodium/potassium-transporting ATPase subunit beta-1                    | LEWLGNCISGL                     | f; g                     |
| IP00871221        | ATP1B1 Isoform 2 of Sodium/potassium-transporting ATPase subunit beta-1; ATP1B1 Isoform 1 of Sodium/potassium-transporting ATPase subunit beta-1                    | LEWLGNCISGLN                    | f; g                     |
| IP00871221        | ATP1B1 Isoform 2 of Sodium/potassium-transporting ATPase subunit beta-1; ATP1B1 Isoform 1 of Sodium/potassium-transporting ATPase subunit beta-1                    | LEWLGNCISGLNDETYGK              | f; g                     |
| IP00871221        | ATP1B1 Isoform 2 of Sodium/potassium-transporting ATPase subunit beta-1; ATP1B1 Isoform 1 of Sodium/potassium-transporting ATPase subunit beta-1                    | PKPKNESLETYPVMK                 | f; g                     |
| IP00871221        | ATP1B1 Isoform 2 of Sodium/potassium-transporting ATPase subunit beta-1; ATP1B1 Isoform 1 of Sodium/potassium-transporting ATPase subunit beta-1                    | SGLNDETYGK                      | f; g                     |
| IP00871221        | ATP1B1 Isoform 2 of Sodium/potassium-transporting ATPase subunit beta-1; ATP1B1 Isoform 1 of Sodium/potassium-transporting ATPase subunit beta-1                    | VLGFKPKPKNESLETYPVMK            | f; g                     |
| IP00871221        | ATP1B1 Isoform 2 of Sodium/potassium-transporting ATPase subunit beta-1; ATP1B1 Isoform 1 of Sodium/potassium-transporting ATPase subunit beta-1                    | VLQPLLAQV                       | f; g                     |
| IP00871221        | ATP1B1 Isoform 2 of Sodium/potassium-transporting ATPase subunit beta-1; ATP1B1 Isoform 1 of Sodium/potassium-transporting ATPase subunit beta-1                    | VLQPLLAQVFNLTMDTEIR             | f; g                     |
| IP00293971        | ATP1B2 Sodium/potassium-transporting ATPase subunit beta-2                                                                                                          | FHVNYTQPL                       | f; g                     |
| IP00293971        | ATP1B2 Sodium/potassium-transporting ATPase subunit beta-2                                                                                                          | FHVNYTQPLVAVK                   | f; g                     |
| IP00293971        | ATP1B2 Sodium/potassium-transporting ATPase subunit beta-2                                                                                                          | FLEPYNDISQAQK                   | f; g                     |
| IP00293971        | ATP1B2 Sodium/potassium-transporting ATPase subunit beta-2                                                                                                          | FLNVPMPVEVNECR                  | f; g                     |
| IP00293971        | ATP1B2 Sodium/potassium-transporting ATPase subunit beta-2                                                                                                          | HVNYTQPLVAVK                    | f; g                     |
| IP00293971        | ATP1B2 Sodium/potassium-transporting ATPase subunit beta-2                                                                                                          | KFHVNYTQPLVAVK                  | f; g                     |
| IP00293971        | ATP1B2 Sodium/potassium-transporting ATPase subunit beta-2                                                                                                          | PNYNDISQAQK                     | f                        |
| IP00293971        | ATP1B2 Sodium/potassium-transporting ATPase subunit beta-2                                                                                                          | QLGNCISGIGDSTHYGYSTGQPCVFVK     | f; g                     |
| IP00293971        | ATP1B2 Sodium/potassium-transporting ATPase subunit beta-2                                                                                                          | SGIGDSTHYGYSTGQPCVFVK           | f                        |
| IP00293971        | ATP1B2 Sodium/potassium-transporting ATPase subunit beta-2                                                                                                          | STGQPCVFVK                      | f; g                     |
| IP00293971        | ATP1B2 Sodium/potassium-transporting ATPase subunit beta-2                                                                                                          | TENLDVIVNVSDTESWDQHVQK          | f; g                     |
| IP00293971        | ATP1B2 Sodium/potassium-transporting ATPase subunit beta-2                                                                                                          | TQLGNCISGIGDSTHYGY              | f; g                     |
| IP00293971        | ATP1B2 Sodium/potassium-transporting ATPase subunit beta-2                                                                                                          | TQLGNCISGIGDSTHYGYSTGQPCVFVK    | f; g                     |
| IP00787965        | ATP1B3 similar to Sodium/potassium-transporting ATPase subunit beta-3 (Sodium/potassium-dependent ATPase beta-3 subunit) (ATPB-3) (CD2)                             | NLTVCPDGLAFQK                   | f; g                     |
| IP01008870        | ATP2B2 Isoform XA of Plasma membrane calcium-transporting ATPase 2                                                                                                  | QSSVTSQSDVANLSSPSR              | h                        |
| IP00784119        | ATP6A1 Vacuolar ATP synthase subunit S1 precursor                                                                                                                   | AQNFVAVK                        | f                        |
| IP00784119        | ATP6A1 Vacuolar ATP synthase subunit S1 precursor                                                                                                                   | DQWEDLTPLTFGVQELNLTGSFWDNSFAR   | f                        |
| IP00784119        | ATP6A1 Vacuolar ATP synthase subunit S1 precursor                                                                                                                   | ELKLNASLPALLLR                  | g                        |
| IP00784119        | ATP6A1 Vacuolar ATP synthase subunit S1 precursor                                                                                                                   | ELNLTGSFWDNSFAR                 | f                        |
| IP00784119        | ATP6A1 Vacuolar ATP synthase subunit S1 precursor                                                                                                                   | LNASLPALLLR                     | g                        |
| IP00784119        | ATP6A1 Vacuolar ATP synthase subunit S1 precursor                                                                                                                   | QKQVSPVHPPVSYNDTAPR             | f                        |
| IP00784119        | ATP6A1 Vacuolar ATP synthase subunit S1 precursor                                                                                                                   | QPVSPVHPPVSYNDTAPR              | f; g                     |
| IP00784119        | ATP6A1 Vacuolar ATP synthase subunit S1 precursor                                                                                                                   | SPVHPPVSYNDTAPR                 | f; g                     |
| IP00640032        | ATP6V0E2 ATPase, H+ transporting, V0 subunit isoform 1                                                                                                              | NETIYYVR                        | f; g                     |
| IP00221038        | ATP8A1 Isoform 2 of Probable Phospholipid-transporting ATPase IA; ATP8A1 Isoform 1 of Probable Phospholipid-transporting ATPase IA                                  | TDDVSEKTLADQEEYR                | h                        |
| IP00014925        | ATP-dependent DNA helicase Q4                                                                                                                                       | TCLHAAVWPGSGGRAPK               | b                        |
| IP00293655        | ATP-dependent helicase DDX1                                                                                                                                         | GHQFSCVLIHGDR                   | b                        |
| IP00293655        | ATP-dependent helicase DDX1                                                                                                                                         | HYYEYVCHDQGLCR                  | b                        |
| IP00293655        | ATP-dependent helicase DDX1                                                                                                                                         | NQALFPACVLK                     | b                        |
| IP00014845        | Axonemal dynein heavy chain 8                                                                                                                                       | AAHEALQDFQK                     | a                        |
| IP00166729        | AZGP1 alpha-2-glycoprotein 1, zinc                                                                                                                                  | DIVEYVYNDNSGSHVLQGR             | g                        |
| IP00166729        | AZGP1 alpha-2-glycoprotein 1, zinc                                                                                                                                  | YVYNDNSGSHVLQGR                 | g                        |
| IP00166729        | AZGP1 alpha-2-glycoprotein 1, zinc                                                                                                                                  | FGCELENR                        | g                        |
| IP00009997        | B3GNT1 N-acetylgalactosaminide beta-1,3-N-acetylglucosaminyltransferase                                                                                             | VAQPGINVALGTNVSYPNLLR           | g                        |
| IP00000644        | BAG-family molecular chaperone regulator-3                                                                                                                          | QCGVYAAAAAAPPASHGPER            | b                        |
| IP00218019        | Basigin long isoform, basigin isoform 3, basigin isoform 4, Basigin precursor                                                                                       | SSEHINEGETAMLVCK                | b                        |
| IP00299024        | BASP1 Isoform 1 of Brain acid soluble protein 1                                                                                                                     | AEGAATEEETGPKSEPEQAAAEPAEK      | h                        |
| IP00299024        | BASP1 Isoform 1 of Brain acid soluble protein 1                                                                                                                     | AQGAASAEPEPKVEAPAAAND           | h                        |
| IP00299024        | BASP1 Isoform 1 of Brain acid soluble protein 1                                                                                                                     | SDGAPASDKPKGSSEAAPSSK           | d; e; h                  |
| IP00791049        | BAT5 HLA-B associated transcript 5                                                                                                                                  | AGAMAKLLSCLVLPGR                | g                        |
| IP00456623        | BCAN Isoform 1 of Brevican core protein                                                                                                                             | DVLEGDSSDR                      | h                        |
| IP00456623        | BCAN Isoform 1 of Brevican core protein precursor                                                                                                                   | TLFLFPNQTGFPNK                  | f; g                     |
| IP00456623        | BCAN Isoform 1 of Brevican core protein precursor                                                                                                                   | VALPAYASLTDVSLASELRPNDSGIYR     | f; g                     |
| IP00011635        | BCL2L13 Isoform 2 of Bel-2-like protein 13                                                                                                                          | EESLVEELSPASEK                  | h                        |
| IP00004656        | Beta-2-microglobulin precursor                                                                                                                                      | SNFLNCYSGFHPSDIEVDLLK           | b                        |
| IP00010790        | BGN Biglycan precursor                                                                                                                                              | MIENGLSFLPLTR                   | f; g                     |
| IP00643384        | BGN Uncharacterized protein BGN; BGN cDNA FLJ35635 fis, clone SPLN2011805, highly similar to BONE/CARTILAGE PROTEOGLYCAN                                            | LQVYVYLSNNTIK                   | f; g                     |
| IP00395860        | BIN1 Isoform IID of Myc box-dependent-interacting protein 1; BIN1 Isoform IIC2 of Myc box-dependent-interacting protein 1; BIN1 Isoform IIB                         | SSPPDGSPPAATPEIR                | c; d; e; h               |
| IP00009619        | BK134P22.1, Brain immunoglobulin receptor precursor                                                                                                                 | EDDGASIVCSVNHESLK               | b                        |
| IP00009619        | BK134P22.1, Brain immunoglobulin receptor precursor                                                                                                                 | EKDTATLNCQSSGSK                 | b                        |
| IP00009619        | BK134P22.1, Brain immunoglobulin receptor precursor                                                                                                                 | EKDTATLNCQSSGSKPAAR             | b                        |
| IP00009619        | BK134P22.1, Brain immunoglobulin receptor precursor                                                                                                                 | LLLHCEGR                        | b                        |
| IP00299024        | Brain acid soluble protein 1                                                                                                                                        | AAEAAAAPAESAPAAAGEEPSK          | d                        |
| IP00299024        | Brain acid soluble protein 1                                                                                                                                        | AAEAAAAPAESAPAAAGEEPSKEEGPK     | c; d                     |
| IP00009619        | Brain immunoglobulin receptor precursor                                                                                                                             | DTATLNCQSSGSKPAAR               | b                        |
| IP0029184         | Brain link protein-1 precursor                                                                                                                                      | CGGLPDPGVR                      | b                        |
| IP0029184         | Brain link protein-1 precursor                                                                                                                                      | LTLSEAAHACR                     | b                        |
| IP00010148        | Brain-specific polypeptide PEP-19                                                                                                                                   | AAVAIQSQFR                      | d                        |
| IP00418194        | Breast cancer-associated antigen                                                                                                                                    | AASQISEMK                       | a                        |
| IP00025311        | Breast carcinoma amplified sequence 1                                                                                                                               | GCNPSGHITQSVTTPPAK              | b                        |
| IP00879194        | BSC1 24 kDa protein                                                                                                                                                 | KSNEGSLISQRVSCP                 | f                        |
| IP00879194        | BSC1 24 kDa protein                                                                                                                                                 | SNEGSLISQRVSCP                  | f                        |
| IP00045906        | BSC1 Isoform 3 of Seipin                                                                                                                                            | TDCDSSTLSLCSFPVANVSLTK          | f                        |
| IP00795150        | BSG 46 kDa protein                                                                                                                                                  | ILLTCSLNDSATVETGHR              | f; g                     |
| IP00744685        | BTD Uncharacterized protein BTD (Fragment)                                                                                                                          | NPVGLGAENATGETDPSHSK            | g                        |
| IP00744685        | BTD Uncharacterized protein BTD (Fragment)                                                                                                                          | WNPCLEPHRFNDTEVLR               | g                        |
| IP00744685        | BTD Uncharacterized protein BTD (Fragment); BTD biotinidase precursor                                                                                               | DVQIVFPEDEGHGF                  | g                        |
| IP00641524        | BTN2A1 Isoform 1 of Butyrophilin subfamily 2 member A1 precursor; BTN2A1 Isoform 2 of Butyrophilin subfamily 2 member A1 precursor                                  | QFIVVGPDPILAIVGENTTLR           | f; g                     |
| IP00006580        | C/EBP-induced protein                                                                                                                                               | AASVPCVAPEK                     | a                        |
| IP00795199        | C10orf38 Astrotropin (Fragment)                                                                                                                                     | LPENTSYDLTAFLAASSPSEVDSFPYLR    | f; g                     |
| IP00880178        | C19orf63 Isoform 3 of UPP0510 protein C19orf63 precursor; C19orf63 28 kDa protein; C19orf63 Isoform 1 of UPP0510 protein C19orf63 precursor                         | GHEVEDVLEFNLSVQLQPPTAPGETAAFIER | f; g                     |
| IP00296165        | C1R:ACYP1;C17orf13 Complement C1 subcomponent precursor                                                                                                             | AGGSPIPOK                       | g                        |
| IP00296165        | C1R:ACYP1;C17orf13 Complement C1 subcomponent precursor                                                                                                             | EHEAQSNSLDVFLGHTNVEELMK         | g                        |
| IP00218342        | C-1-tetrahydrofolate synthase, cytoplasmic (C1-THF synthase) [Includes: Methylenetetrahydrofolate dehydrogenase (EC 1.5.1.5); Methylenetetrahydrofolate synthetase] | CTHWAEGGK                       | b                        |
| IP00309363        | C2 Complement C2 precursor (Fragment)                                                                                                                               | QSPVAHFVNLGSK                   | g                        |
| IP00016848        | C20orf103 Uncharacterized protein C20orf103 precursor                                                                                                               | ENGTCLMAEFAAK                   | f; g                     |
| IP00791304        | C20orf3 Chromosome 20 open reading frame 3; C20orf3 Adipocyte plasma membrane-associated protein                                                                    | AGPNGTLFVADAYK                  | f; g                     |
| IP00791304        | C20orf3 Chromosome 20 open reading frame 3; C20orf3 Adipocyte plasma membrane-associated protein                                                                    | NMSFVNDLTVTDGDR                 | f                        |
| IP00783987        | C3 Complement C3 precursor (Fragment)                                                                                                                               | TVLTPATNMGVNTTTPANR             | f; g                     |
| IP00889723        | C4A;C4B complement component 4B preproprotein; C4A Complement component 4A; C4A Complement C4-A precursor                                                           | FEQLLERPVLY                     | f; g                     |
| IP00889723        | C4A;C4B complement component 4B preproprotein; C4A Complement component 4A; C4A Complement C4-A precursor                                                           | FSDGLESSNSTQFEVVK               | f; g                     |
| IP00889723        | C4A;C4B complement component 4B preproprotein; C4A Complement component 4A; C4A Complement C4-A precursor                                                           | QGSFGGQFR                       | f; g                     |
| IP00889723        | C4A;C4B complement component 4B preproprotein; C4B Complement C4-B precursor; C4A Complement C4-A precursor                                                         | GLNVLSTSGR                      | f; g                     |
| IP00879709        | C6 complement component 6 precursor                                                                                                                                 | VLNFTTK                         | j                        |
| IP0002395         | C9 Complement component C9 precursor                                                                                                                                | AVNITSENLDVVSLIR                | f; g                     |
| IP00479514        | CACNA2D1 Voltage-dependent calcium channel subunit alpha-2/delta-1 precursor                                                                                        | GFSFAFQLLNYSR                   | f; g                     |
| IP00479514        | CACNA2D1 Voltage-dependent calcium channel subunit alpha-2/delta-1 precursor                                                                                        | IDVNSWIENFTK                    | f                        |



| IPi Accession No. | Protein Description                                                                                                                                                                                            | Peptide Sequence*               | Primary Source Dataset** |
|-------------------|----------------------------------------------------------------------------------------------------------------------------------------------------------------------------------------------------------------|---------------------------------|--------------------------|
| IP00479514        | CACNA2D1 Voltage-dependent calcium channel subunit alpha-2/delta-1 precursor                                                                                                                                   | ISDNTEFLNLFNEFDR                | f g                      |
| IP00479514        | CACNA2D1 Voltage-dependent calcium channel subunit alpha-2/delta-1 precursor                                                                                                                                   | QSCITEIQYVFDNDSK                | f                        |
| IP00479514        | CACNA2D1 Voltage-dependent calcium channel subunit alpha-2/delta-1 precursor; CACNA2D1 Dihydropyridine receptor alpha 2 subunit                                                                                | HLVNSVYAFNK                     | f                        |
| IP00479514        | CACNA2D1 Voltage-dependent calcium channel subunit alpha-2/delta-1 precursor; CACNA2D1 Dihydropyridine receptor alpha 2 subunit                                                                                | SFSGVLDGCGNSCR                  | f                        |
| IP00479514        | CACNA2D1 Voltage-dependent calcium channel subunit alpha-2/delta-1 precursor; CACNA2D1 Dihydropyridine receptor alpha 2 subunit                                                                                | SLDNDVNYFTAPYFNK                | f                        |
| IP00871339        | CACNA2D2 129 kDa protein; CACNA2D2 Isoform 5 of Voltage-dependent calcium channel subunit alpha-2/delta-2 precursor; CACNA2D2 Isoform 5 of Voltage-dependent calcium channel subunit alpha-2/delta-2 precursor | AGEFYAFDQLQSNSTR                | f g                      |
| IP00796052        | CACNA2D2 Isoform 5 of Voltage-dependent calcium channel subunit alpha-2/delta-2 precursor                                                                                                                      | NTWVPIR                         | f g                      |
| IP00166392        | CADM1 Immunoglobulin superfamily member 4                                                                                                                                                                      | DTAVEGEEIEVNTAMASK              | f                        |
| IP00166392        | CADM1 Immunoglobulin superfamily member 4                                                                                                                                                                      | QLLNFSSELK                      | f g                      |
| IP00166392        | CADM1 Immunoglobulin superfamily member 4                                                                                                                                                                      | YSLNVNVSISDEGR                  | g                        |
| IP00166392        | CADM1 Immunoglobulin superfamily member 4; CADM1 Isoform 1 of Cell adhesion molecule 1 precursor                                                                                                               | QLLNFSSELK                      | f g                      |
| IP00470388        | CADM2 Isoform 2 of Cell adhesion molecule 2 precursor; CADM2 Isoform 1 of Cell adhesion molecule 2 precursor; CADM2 Isoform 3 of Cell adhesion molecule 2 precursor                                            | ELNLFNFK                        | f g                      |
| IP00470388        | CADM2 Isoform 2 of Cell adhesion molecule 2 precursor; CADM2 Isoform 1 of Cell adhesion molecule 2 precursor; CADM2 Isoform 3 of Cell adhesion molecule 2 precursor                                            | ELNLFNFKDNGTYR                  | f                        |
| IP00470388        | CADM2 Isoform 2 of Cell adhesion molecule 2 precursor; CADM2 Isoform 1 of Cell adhesion molecule 2 precursor; CADM2 Isoform 3 of Cell adhesion molecule 2 precursor                                            | PAQQLTYFDKDK                    | f g                      |
| IP00470388        | CADM2 Isoform 2 of Cell adhesion molecule 2 precursor; CADM2 Isoform 1 of Cell adhesion molecule 2 precursor; CADM2 Isoform 3 of Cell adhesion molecule 2 precursor                                            | VDQNNTSLQWSNPAQQQLTYFDKDK       | f g                      |
| IP00470388        | CADM2 Isoform 2 of Cell adhesion molecule 2 precursor; CADM2 Isoform 1 of Cell adhesion molecule 2 precursor; CADM2 Isoform 3 of Cell adhesion molecule 2 precursor                                            | VDQNNTSLQWSNPAQQQLTYFDKDK       | f g                      |
| IP00470388        | CADM2 Isoform 2 of Cell adhesion molecule 2 precursor; CADM2 Isoform 3 of Cell adhesion molecule 2 precursor                                                                                                   | GSQGGFPLTQNVTVVEGTAILT          | f g                      |
| IP00470388        | CADM2 Isoform 2 of Cell adhesion molecule 2 precursor; CADM2 Isoform 3 of Cell adhesion molecule 2 precursor                                                                                                   | GSQGGFPLTQNVTVVEGTAILTCR        | f g                      |
| IP00470388        | CADM2 Isoform 2 of Cell adhesion molecule 2 precursor; CADM2 Isoform 3 of Cell adhesion molecule 2 precursor                                                                                                   | SNPAQQLTYFDKDK                  | f                        |
| IP00470388        | CADM2 Isoform 2 of Cell adhesion molecule 2 precursor; CADM2 Isoform 3 of Cell adhesion molecule 2 precursor                                                                                                   | YDHESLNATPOVAMQVLEHYHTPSVK      | f                        |
| IP00166048        | CADM3 Isoform 1 of Cell adhesion molecule 3 precursor; CADM3 Isoform 2 of Cell adhesion molecule 3 precursor                                                                                                   | MTQESALIFPFLNK                  | f g                      |
| IP00383615        | CADM3 Isoform 3 of Cell adhesion molecule 3 precursor                                                                                                                                                          | TQESALIFPFLNK                   | f g                      |
| IP00176427        | CADM4 Cell adhesion molecule 4 precursor                                                                                                                                                                       | EAAVGETLTLPLGLYSADNGTYCEASNK    | f g                      |
| IP00176427        | CADM4 Cell adhesion molecule 4 precursor                                                                                                                                                                       | EAVGETLTLPLGLYSADNGTYCEASNK     | f g                      |
| IP00176427        | CADM4 Cell adhesion molecule 4 precursor                                                                                                                                                                       | QTLFFNGTR                       | f g                      |
| IP00220361        | Calbindin 1                                                                                                                                                                                                    | AFELYDQDGNGYDENELDALLKDLCEK     | b                        |
| IP00005592        | Calcium/calmodulin-dependent 3',5'-cyclic nucleotide phosphodiesterase 1B                                                                                                                                      | NLDLWCFDVSLSQAADHDHALR          | b                        |
| IP00005592        | Calcium/calmodulin-dependent 3',5'-cyclic nucleotide phosphodiesterase 1B                                                                                                                                      | QGDKEAELGLPFPPLCDR              | b                        |
| IP00377174        | calcium/calmodulin-dependent protein kinase IIB isoform 4, Splice isoform 3 of Q13554 Calcium/calmodulin-dependent protein kinase type II beta                                                                 | ICDPGLTSEFEALGNLVEGMDFHR        | b; d                     |
| IP00377174        | calcium/calmodulin-dependent protein kinase IIB isoform 4, Splice isoform 3 of Q13554 Calcium/calmodulin-dependent protein kinase type II beta                                                                 | LCTGHEYAAK                      | b                        |
| IP00377174        | calcium/calmodulin-dependent protein kinase IIB isoform 4, Splice isoform 3 of Q13554 Calcium/calmodulin-dependent protein kinase type II beta                                                                 | QNVNHFHCSGAPVAPLQ               | b                        |
| IP00020984        | Calnexin precursor                                                                                                                                                                                             | CESAPGCGVQRPVIDPNYK             | b                        |
| IP00020984        | Calnexin precursor                                                                                                                                                                                             | LFDTKPLIQYEVFNQNGCEGAYVK        | b                        |
| IP00789155        | CALU Calumenin precursor; CALU Isoform 1 of Calumenin precursor                                                                                                                                                | NATYGVLDLDPDPPDGFNYK            | f                        |
| IP00877169        | CAMK2A calcium/calmodulin-dependent protein kinase IIA isoform 2; CAMK2A Isoform B of Calcium/calmodulin-dependent protein kinase type II alpha                                                                | WQVHFHR                         | f                        |
| IP00215715        | CAMK2A Isoform A of Calcium/calmodulin-dependent protein kinase type II subunit alpha                                                                                                                          | ESSESTNTIEDEDTKYR               | h                        |
| IP00215715        | CAMK2A Isoform A of Calcium/calmodulin-dependent protein kinase type II subunit alpha                                                                                                                          | SDGVKSESESTNTIEDEDTK            | h                        |
| IP00377174        | CAMK2B Isoform 8 of Calcium/calmodulin-dependent protein kinase type II beta; CAMK2B Isoform 1 of Calcium/calmodulin-dependent protein kinase type II beta                                                     | NSAAATSPK                       | h                        |
| IP00554752        | cAMP-dependent protein kinase type II-beta regulatory subunit                                                                                                                                                  | AATITATSPGALWGLDR               | c                        |
| IP00941747        | CANX Calnexin; CANX cDNA FLJ55574, highly similar to Calnexin                                                                                                                                                  | QKSDAEEDGTVSQEEDR               | h                        |
| IP00965501        | CANX cDNA FLJ54242, highly similar to Calnexin; CANX Calnexin; CANX cDNA FLJ55574, highly similar to Calnexin                                                                                                  | AEDEILNRSR                      | h                        |
| IP00922569        | CAP2 Adenylyl cyclase-associated protein; CAP2 Adenylyl cyclase-associated protein; CAP2 Adenylyl cyclase-associated protein 2                                                                                 | SHTPSTSPK                       | h                        |
| IP00300838        | Carbohydrate sulfotransferase 8                                                                                                                                                                                | EALRTGSGVR                      | a                        |
| IP00008388        | CARBONYL reductase                                                                                                                                                                                             | AVTNHSYVSTK                     | b                        |
| IP00385480        | Caskin-1                                                                                                                                                                                                       | AAAAAAAAAAAAAPPAPPEGASPGDSAR    | c                        |
| IP00385480        | Cask-interacting protein 1                                                                                                                                                                                     | GCHIDNR                         | b                        |
| IP00011284        | Catechol O-methyltransferase, membrane-bound form (EC 2.1.1.6) (MB-COMT)  Contains: Catechol O-methyltransferase, soluble form (S-COMT)                                                                        | ILNHYLQHAEPGNAQVSLAIDTYCEQK     | b                        |
| IP00011284        | Catechol O-methyltransferase, membrane-bound form (EC 2.1.1.6) (MB-COMT)  Contains: Catechol O-methyltransferase, soluble form (S-COMT)                                                                        | IVDAVQIEHQPSVLLLELGAAYCGYSAVR   | b                        |
| IP00784432        | CBX6 53 kDa protein; NPTXR neuronal pentraxin receptor                                                                                                                                                         | ALPGGDANVASGAAASPGPQR           | f                        |
| IP00784432        | CBX6 53 kDa protein; NPTXR neuronal pentraxin receptor                                                                                                                                                         | VNLSAAPVAPVASVPTGLHSK           | f g                      |
| IP00795801        | CD109 Isoform 4 of CD109 antigen precursor; CD109 Isoform 1 of CD109 antigen precursor                                                                                                                         | TQDEILFNSSTR                    | f g                      |
| IP00795801        | CD109 Isoform 4 of CD109 antigen precursor; CD109 Isoform 2 of CD109 antigen precursor; CD109 Isoform 1 of CD109 antigen precursor                                                                             | INVTVPQSGTFFK                   | f g                      |
| IP00029260        | CD14 Monocyte differentiation antigen CD14 precursor                                                                                                                                                           | NVSWATGR                        | a                        |
| IP00795642        | CD163 Isoform 2 of Scavenger receptor cysteine-rich type 1 protein M130 precursor; CD163 Isoform 3 of Scavenger receptor cysteine-rich type 1 protein M130 precursor                                           | EDAAYVNTDISVQK                  | f g                      |
| IP00015102        | CD166 antigen precursor                                                                                                                                                                                        | SSPFSLSLHYQDAGNYVCETALQEVEGLK   | b                        |
| IP00015102        | CD166 antigen precursor                                                                                                                                                                                        | THCHVEGFPK                      | b                        |
| IP00793688        | CD276 60 kDa protein; CD276 Isoform 4 of CD276 antigen precursor; CD276 Isoform 3 of CD276 antigen precursor; CD276 Isoform 1 of CD276 antigen precursor                                                       | TALFLPDLAQQNASLR                | f g                      |
| IP00006071        | CD38 Isoform 1 of ADP-ribosyl cyclase 1                                                                                                                                                                        | HPCNTEEDYQPLMK                  | f g                      |
| IP00006071        | CD38 Isoform 1 of ADP-ribosyl cyclase 1                                                                                                                                                                        | IFDKNSTFGSEVHNLQPEK             | f g                      |
| IP00413696        | CD47 41 kDa protein                                                                                                                                                                                            | DAVSHTGNYTCEVTELTR              | f                        |
| IP00413696        | CD47 41 kDa protein                                                                                                                                                                                            | DIYTFDGALNK                     | f g                      |
| IP00413696        | CD47 41 kDa protein                                                                                                                                                                                            | FVTNMEAQNTVEYVK                 | f                        |
| IP00413696        | CD47 41 kDa protein                                                                                                                                                                                            | GRDIYTFDGALNK                   | f                        |
| IP00413696        | CD47 41 kDa protein                                                                                                                                                                                            | MDKSDAVSHTGNYTCEVTELTR          | f                        |
| IP00413696        | CD47 41 kDa protein                                                                                                                                                                                            | RDIYTFDGALNK                    | f g                      |
| IP00413696        | CD47 41 kDa protein                                                                                                                                                                                            | SDAVSHTGNYT                     | f                        |
| IP00413696        | CD47 41 kDa protein                                                                                                                                                                                            | SDAVSHTGNYTCEVTELTR             | f g                      |
| IP00382926        | CD55 Decay-accelerating factor splicing variant 5                                                                                                                                                              | GSQWSDIEEFCNR                   | g                        |
| IP00791516        | CD59 13 kDa protein; CD59 CD59 glycoprotein precursor                                                                                                                                                          | TAVNCSDFDACLTIK                 | f g                      |
| IP00020446        | CD82 CD82 antigen                                                                                                                                                                                              | DYNSREDLSQDAWDYQAVQVK           | f g                      |
| IP00295399        | CDH10 Cadherin-10 precursor                                                                                                                                                                                    | ELSQVHNLTVIAAEINPK              | f                        |
| IP00024046        | CDH13 Cadherin-13 precursor                                                                                                                                                                                    | ANYNLPIMVTDGKPPMNTDRLR          | f                        |
| IP00024046        | CDH13 Cadherin-13 precursor                                                                                                                                                                                    | DPAGVNLNPNPQVDTTAVLDR           | f                        |
| IP00024046        | CDH13 Cadherin-13 precursor                                                                                                                                                                                    | INNTHALVSLQLNPK                 | f g                      |
| IP00024046        | CDH13 Cadherin-13 precursor                                                                                                                                                                                    | NLSVVLGASDK                     | f                        |
| IP00024046        | CDH13 Cadherin-13 precursor                                                                                                                                                                                    | NLSVVLGASDKLHPNTDFPK            | f                        |
| IP00024046        | CDH13 Cadherin-13 precursor                                                                                                                                                                                    | PINGTVDTTAVLDR                  | f                        |
| IP00024046        | CDH13 Cadherin-13 precursor                                                                                                                                                                                    | QEDLSVGSVLLTVNATDPDSLQHQITR     | f g                      |
| IP00024046        | CDH13 Cadherin-13 precursor                                                                                                                                                                                    | VFHINQPAEFIEQHSILNLFSDCK        | g                        |
| IP00024046        | CDH13 Cadherin-13 precursor                                                                                                                                                                                    | YSVYKDPAGVNLNPNPQVDTTAVLDR      | f g                      |
| IP00290085        | CDH2 Cadherin-2 precursor                                                                                                                                                                                      | IVSQAPSTPSNMFMTINNETGDITVAAGLDR | f                        |
| IP00290085        | CDH2 Cadherin-2 precursor                                                                                                                                                                                      | SNISILR                         | f g                      |
| IP00290085        | CDH2 Cadherin-2 precursor                                                                                                                                                                                      | VDIIVANLTVTDKQPHTPAWNAVYR       | f                        |
| IP00024036        | CDH8 Cadherin-8 precursor                                                                                                                                                                                      | ELSVWHNTHIAEIR                  | f                        |
| IP00024036        | CDH8 Cadherin-8 precursor                                                                                                                                                                                      | DPDITSSPIR                      | f                        |
| IP00922028        | cDNA FLJ60546, highly similar to Homo sapiens bridging integrator 1 (BIN1), transcript variant 3, mRNA; BIN1 Isoform IID of Myc box domain containing protein 1                                                | GKNSPSPDGGSPAATPEIR             | h                        |
| IP00304600        | CDNA FLJ90813 fis, clone Y79AA1000967, weakly similar to CALCIUM-CALMODULIN-DEPENDENT P                                                                                                                        | AAATPEPAMQPDSTAPEGATQAPPSSK     | d                        |
| IP00029739        | CFH Isoform 1 of Complement factor H precursor                                                                                                                                                                 | EFDHNSNIR                       | g                        |
| IP00029739        | CFH Isoform 1 of Complement factor H precursor                                                                                                                                                                 | IFCSQPQIEHGKTNSSR               | g                        |
| IP00291867        | CFI Complement factor I precursor                                                                                                                                                                              | FLNNGTCTAEGK                    | i                        |
| IP00019328        | Channel associated protein of synapse-110                                                                                                                                                                      | FGSCVPHITRPK                    | b                        |
| IP00019328        | Channel associated protein of synapse-110                                                                                                                                                                      | HCLDVSNGNAIK                    | b                        |
| IP00019328        | Channel associated protein of synapse-110                                                                                                                                                                      | VNDCILR                         | b                        |
| IP00383975        | CHGA Full-length cDNA clone CS0DN001YP04 of Adult brain of Homo sapiens; CHGA Chromogranin-A                                                                                                                   | GGKSGLEQEER                     | h                        |
| IP00066001        | CHGB Secretogranin-1                                                                                                                                                                                           | SETHAAGHSQEK                    | h                        |
| IP00783390        | CHL1 Isoform 1 of Neural cell adhesion molecule L1-like protein precursor                                                                                                                                      | EETVTNHTLR                      | g                        |
| IP00783390        | CHL1 Isoform 1 of Neural cell adhesion molecule L1-like protein precursor                                                                                                                                      | HFSSNNGTFR                      | g                        |

| IPI Accession No. | Protein Description                                                                                                                                                                | Peptide Sequence*                         | Primary Source Dataset** |
|-------------------|------------------------------------------------------------------------------------------------------------------------------------------------------------------------------------|-------------------------------------------|--------------------------|
| IP100783390       | CHL1 Isoform 1 of Neural cell adhesion molecule L1-like protein precursor                                                                                                          | ISGVNLTQK                                 | g                        |
| IP100783390       | CHL1 Isoform 1 of Neural cell adhesion molecule L1-like protein precursor                                                                                                          | LTVNSSSNIK                                | g                        |
| IP100783390       | CHL1 Isoform 1 of Neural cell adhesion molecule L1-like protein precursor                                                                                                          | VQAINQLGSGPDPQSVTLYSGEDYPTAPVHIGVDVNSTLVK | g                        |
| IP100783390       | CHL1 Isoform 1 of Neural cell adhesion molecule L1-like protein precursor                                                                                                          | YHIEYNGTLQNR                              | f                        |
| IP100783390       | CHL1 Isoform 1 of Neural cell adhesion molecule L1-like protein precursor                                                                                                          | LTWEAGADHNISEYIVFEFEGNKEEPGR              | f                        |
| IP100783390       | CHL1 Isoform 1 of Neural cell adhesion molecule L1-like protein precursor                                                                                                          | QTEGVPPEQPTFLK                            | f                        |
| IP100783390       | CHL1 Isoform 1 of Neural cell adhesion molecule L1-like protein precursor; CHL1 Isoform 2 of Neural cell adhesion molecule L1-like protein precursor                               | SGEDYPTAPVHIGVDVNSTLVK                    | g                        |
| IP100783390       | CHL1 Isoform 1 of Neural cell adhesion molecule L1-like protein precursor; CHL1 Isoform 2 of Neural cell adhesion molecule L1-like protein precursor                               | VQAINQLGSGPDPQSV                          | g                        |
| IP100783390       | CHL1 Isoform 1 of Neural cell adhesion molecule L1-like protein precursor; CHL1 Isoform 2 of Neural cell adhesion molecule L1-like protein precursor                               | VQAINQLGSGPDPQSVTLY                       | g                        |
| IP100783390       | CHL1 Isoform 1 of Neural cell adhesion molecule L1-like protein precursor; CHL1 Isoform 2 of Neural cell adhesion molecule L1-like protein precursor                               | VTWKPQAPVWEVEETVNTHLR                     | f; g                     |
| IP100298889       | Chloride channel protein 3                                                                                                                                                         | VCFQHTPSLPAESPRPLK                        | b                        |
| IP10001960        | Chloride intracellular channel protein 4                                                                                                                                           | TDVNKIEEFLVLCPPK                          | b                        |
| IP100796634       | CHRM2 3 kDa protein; CHRM2 3 kDa protein; CHRM2 3 kDa protein; CHRM2 M2 muscarinic acetylcholine receptor; CHRM2 Muscarinic M2                                                     | MNNSSTSSNSLA                              | f                        |
| IP10002977        | CKB Creatine kinase B-type                                                                                                                                                         | PDNLOGGDDLDPMVYLSR                        | f; g                     |
| IP10002977        | CKB Creatine kinase B-type                                                                                                                                                         | SNLGTGLR                                  | f                        |
| IP10186968        | Caspin homolog                                                                                                                                                                     | AARLSKEALK                                | a                        |
| IP100026053       | Claudin-11                                                                                                                                                                         | PLYDHLPLGYYQACR                           | b                        |
| IP100981494       | CLDN11 claudin-11 isoform 2; CLDN11 Claudin-11                                                                                                                                     | FYYTASGSSPHTAK                            | b                        |
| IP100793848       | CLU 54 kDa protein                                                                                                                                                                 | EIRHNSTGCLR                               | g                        |
| IP100793848       | CLU 54 kDa protein                                                                                                                                                                 | KKEDALNETR                                | g                        |
| IP100793848       | CLU 54 kDa protein                                                                                                                                                                 | LANLTQGEDQYY                              | g                        |
| IP100793848       | CLU 54 kDa protein                                                                                                                                                                 | LTQGEDQYYLR                               | g                        |
| IP100793848       | CLU 54 kDa protein                                                                                                                                                                 | YSRLANLTQGEDQYYLR                         | g                        |
| IP100793848       | CLU 54 kDa protein                                                                                                                                                                 | EDQYYLR                                   | g                        |
| IP100793848       | CLU 54 kDa protein                                                                                                                                                                 | NLTQGEDQYYLR                              | g                        |
| IP100793848       | CLU 54 kDa protein                                                                                                                                                                 | QLEEFLNQS                                 | g                        |
| IP100795633       | CLU CLU; CLU 54 kDa protein; CLU clusterin isoform 1; CLU Clusterin precursor                                                                                                      | EQFNWYSR                                  | g                        |
| IP100795633       | CLU CLU; CLU 54 kDa protein; CLU clusterin isoform 1; CLU Clusterin precursor                                                                                                      | SLEQLNEQFNWYSR                            | g                        |
| IP100795633       | CLU CLU; CLU 54 kDa protein; CLU clusterin isoform 1; CLU Clusterin precursor                                                                                                      | GEDQYYLR                                  | g                        |
| IP100795633       | CLU CLU; CLU 54 kDa protein; CLU clusterin isoform 1; CLU Clusterin precursor                                                                                                      | KKEDALNETRESETK                           | g                        |
| IP100795633       | CLU CLU; CLU 54 kDa protein; CLU clusterin isoform 1; CLU Clusterin precursor                                                                                                      | NEQFNWYSR                                 | g                        |
| IP100795633       | CLU CLU; CLU 54 kDa protein; CLU clusterin isoform 1; CLU Clusterin precursor                                                                                                      | QLEEFLNQSSPFYWMNGDR                       | f; g                     |
| IP100795633       | CLU CLU; CLU 54 kDa protein; CLU clusterin isoform 1; CLU Clusterin precursor                                                                                                      | TQGEDQYYLR                                | g                        |
| IP100795633       | CLU CLU; CLU 54 kDa protein; CLU clusterin isoform 1; CLU Clusterin precursor                                                                                                      | QLEEFLNQSSPF                              | f                        |
| IP100400826       | CLU clusterin isoform 1                                                                                                                                                            | LANLTQGEDQYYLR                            | f; g                     |
| IP100400826       | CLU clusterin isoform 1                                                                                                                                                            | ANLTQGEDQYYLR                             | f; g                     |
| IP100400826       | CLU clusterin isoform 1                                                                                                                                                            | MLNTSSLEQLNEQFNW                          | f; g                     |
| IP100400826       | CLU clusterin isoform 1                                                                                                                                                            | RLANLTQGEDQYYLR                           | f; g                     |
| IP100400826       | CLU clusterin isoform 1                                                                                                                                                            | YTTVASHTSDSDVPSGVTEVVVK                   | f; g                     |
| IP100400826       | CLU clusterin isoform 1; CLU Clusterin precursor                                                                                                                                   | HNSTGCLR                                  | g                        |
| IP100400826       | CLU clusterin isoform 1; CLU Clusterin precursor                                                                                                                                   | MLNTSSLEQLNEQFNWYSR                       | f; g                     |
| IP100400826       | CLU clusterin isoform 1; CLU Clusterin precursor                                                                                                                                   | LANLTQGEDQY                               | f; g                     |
| IP100400826       | CLU clusterin isoform 1; CLU Clusterin precursor                                                                                                                                   | QLEEFLNQSSPFYF                            | f; g                     |
| IP100400826       | CLU clusterin isoform 1; CLU Clusterin precursor                                                                                                                                   | QLEEFLNQSSPFYF                            | f; g                     |
| IP100749466       | CNDP1 35 kDa protein; CNDP1 cDNA FLJ16195 fs. clone BRTHA3000296; CNDP1 Beta-Ala-His dipeptidase precursor                                                                         | LYPHMNVSAVEK                              | f; g                     |
| IP100064667       | CNDP1 Beta-Ala-His dipeptidase precursor                                                                                                                                           | AHLDLEEYR                                 | g                        |
| IP100064667       | CNDP1 Beta-Ala-His dipeptidase precursor                                                                                                                                           | AHLDLEEYRNSR                              | g                        |
| IP100064667       | CNDP1 Beta-Ala-His dipeptidase precursor                                                                                                                                           | AHLDLEEYRNSRVEK                           | g                        |
| IP100306667       | CNP Isoform CNPII of 2',3'-cyclic-nucleotide 3'-Phosphodiesterase                                                                                                                  | KMSSSGAK                                  | h                        |
| IP100216641       | CNTN1 Isoform 2 of Contactin-1 precursor; CNTN1 Isoform 1 of Contactin-1 precursor                                                                                                 | ALGNPVPDIR                                | f; g                     |
| IP100216641       | CNTN1 Isoform 2 of Contactin-1 precursor; CNTN1 Isoform 1 of Contactin-1 precursor                                                                                                 | ANSTGLVITDPTIR                            | f; g                     |
| IP100216641       | CNTN1 Isoform 2 of Contactin-1 precursor; CNTN1 Isoform 1 of Contactin-1 precursor                                                                                                 | DVYALMGQNVLTLECF                          | f                        |
| IP100216641       | CNTN1 Isoform 2 of Contactin-1 precursor; CNTN1 Isoform 1 of Contactin-1 precursor                                                                                                 | DVYALMGQNVLTLECFALGNPVPDIR                | f                        |
| IP100216641       | CNTN1 Isoform 2 of Contactin-1 precursor; CNTN1 Isoform 1 of Contactin-1 precursor                                                                                                 | FALGNPVPDIR                               | f                        |
| IP100216641       | CNTN1 Isoform 2 of Contactin-1 precursor; CNTN1 Isoform 1 of Contactin-1 precursor                                                                                                 | FVSSPSITK                                 | f                        |
| IP100216641       | CNTN1 Isoform 2 of Contactin-1 precursor; CNTN1 Isoform 1 of Contactin-1 precursor                                                                                                 | GKANSTGLVITDPTIR                          | f                        |
| IP100216641       | CNTN1 Isoform 2 of Contactin-1 precursor; CNTN1 Isoform 1 of Contactin-1 precursor                                                                                                 | GNYSCEF                                   | f                        |
| IP100216641       | CNTN1 Isoform 2 of Contactin-1 precursor; CNTN1 Isoform 1 of Contactin-1 precursor                                                                                                 | GNYSCEFVSSPSITK                           | f; g                     |
| IP100216641       | CNTN1 Isoform 2 of Contactin-1 precursor; CNTN1 Isoform 1 of Contactin-1 precursor                                                                                                 | GTEWLNSNR                                 | f; g                     |
| IP100216641       | CNTN1 Isoform 2 of Contactin-1 precursor; CNTN1 Isoform 1 of Contactin-1 precursor                                                                                                 | ILJWEDGSLLEINSTR                          | f; g                     |
| IP100216641       | CNTN1 Isoform 2 of Contactin-1 precursor; CNTN1 Isoform 1 of Contactin-1 precursor                                                                                                 | TIVDNSSASADLVVR                           | g                        |
| IP100216641       | CNTN1 Isoform 2 of Contactin-1 precursor; CNTN1 Isoform 1 of Contactin-1 precursor                                                                                                 | YHWTDBHVALSNSTVITGK                       | f; g                     |
| IP100216641       | CNTN1 Isoform 2 of Contactin-1 precursor; CNTN1 Isoform 1 of Contactin-1 precursor                                                                                                 | YTCTAQITVDNSSASADLVVR                     | f; g                     |
| IP100024966       | CNTN2 Contactin-2 precursor                                                                                                                                                        | ANSTGILSVR                                | f; g                     |
| IP100024966       | CNTN2 Contactin-2 precursor                                                                                                                                                        | GTEILVNSNR                                | f; g                     |
| IP100024966       | CNTN2 Contactin-2 precursor                                                                                                                                                        | VPGADAFYFVSNESVRYTPFEVK                   | f; g                     |
| IP100024966       | CNTN2 Contactin-2 precursor                                                                                                                                                        | WDPVVPFERNESAVTGYK                        | f; g                     |
| IP100219249       | CNTNAP1 Contactin-associated protein 1                                                                                                                                             | DQNLPLEESRSE                              | h                        |
| IP100219249       | CNTNAP1 Contactin-associated protein 1 precursor                                                                                                                                   | ANHSILDVSYFR                              | f; g                     |
| IP100219249       | CNTNAP1 Contactin-associated protein 1 precursor                                                                                                                                   | DVNFITLDGVYQR                             | f; g                     |
| IP100219249       | CNTNAP1 Contactin-associated protein 1 precursor                                                                                                                                   | GLLTVFVHPLVPTQVVGDTNR                     | f                        |
| IP100219249       | CNTNAP1 Contactin-associated protein 1 precursor                                                                                                                                   | IVFLAWNPK                                 | f; g                     |
| IP100219249       | CNTNAP1 Contactin-associated protein 1 precursor                                                                                                                                   | TSGNFTIDDPGSGPLKPF                        | f; g                     |
| IP100219249       | CNTNAP1 Contactin-associated protein 1 precursor                                                                                                                                   | VDGQLVNLTLVEGR                            | f; g                     |
| IP100219249       | CNTNAP1 Contactin-associated protein 1 precursor                                                                                                                                   | VELNTR                                    | f; g                     |
| IP100219249       | CNTNAP1 Contactin-associated protein 1 precursor                                                                                                                                   | YQLGTSFYVYQLTTRPTDGPHSINSTR               | f                        |
| IP100029343       | CNTNAP2 Isoform 1 of Contactin-associated protein-like 2 precursor                                                                                                                 | KPGSFANVSDIMCAIDR                         | f; g                     |
| IP100029343       | CNTNAP2 Isoform 1 of Contactin-associated protein-like 2 precursor                                                                                                                 | TVPVFFNATSYLVEVGR                         | f; g                     |
| IP100029343       | CNTNAP2 Isoform 1 of Contactin-associated protein-like 2 precursor                                                                                                                 | VGVIHINTQTK                               | f; g                     |
| IP100329573       | COL12A1 Isoform 1 of Collagen alpha-1(XI) chain precursor                                                                                                                          | EAGNITDGYELGK                             | f; g                     |
| IP100329573       | COL12A1 Isoform 1 of Collagen alpha-1(XI) chain precursor                                                                                                                          | GLPGPPGQGESR                              | f                        |
| IP100329573       | COL12A1 Isoform 1 of Collagen alpha-1(XI) chain precursor                                                                                                                          | MLEAYNLTEK                                | f; g                     |
| IP100550918       | COL14A1 Isoform 2 of Collagen alpha-1(XIV) chain precursor; COL14A1 Isoform 3 of Collagen alpha-1(XIV) chain precursor; COL14A1 Isoform 1 of Collagen alpha-1(XIV) chain precursor | SFMVNWTHAPGVEK                            | f; g                     |
| IP100873137       | COL1A2 130 kDa protein; COL1A2 Collagen alpha-2(I) chain precursor                                                                                                                 | GFPQTPGLPFGKGR                            | f; g                     |
| IP100291136       | COL6A1 Collagen alpha-1(VI) chain precursor                                                                                                                                        | EGPVGVPDGPGEAGPIGPKGYR                    | f; g                     |
| IP100291136       | COL6A1 Collagen alpha-1(VI) chain precursor                                                                                                                                        | GEDGPAGNGTEGFPGPGVGNR                     | f; g                     |
| IP100291136       | COL6A1 Collagen alpha-1(VI) chain precursor                                                                                                                                        | NVTAQICDK                                 | f; g                     |
| IP100304840       | COL6A2 Isoform 2C2 of Collagen alpha-2(VI) chain precursor                                                                                                                         | GTFTDCALANMTEQIR                          | f; g                     |
| IP100304840       | COL6A2 Isoform 2C2 of Collagen alpha-2(VI) chain precursor                                                                                                                         | NMTLSDLVAEK                               | f; g                     |
| IP100304840       | COL6A2 Isoform 2C2 of Collagen alpha-2(VI) chain precursor                                                                                                                         | NSCLEIPGSPGPKGYR                          | f; g                     |
| IP100072918       | COL6A3 alpha 3 type VI collagen isoform 4 precursor                                                                                                                                | GPISGIPKGPGEDEGR                          | f; g                     |
| IP100072918       | COL6A3 alpha 3 type VI collagen isoform 4 precursor                                                                                                                                | GPPVNGTQGGCPCGQR                          | f; g                     |
| IP100220701       | COL6A3 Isoform 2 of Collagen alpha-3(VI) chain precursor                                                                                                                           | QILNALQNNNAVGHALVLPAGR                    | f; g                     |
| IP100385287       | Collagenase-3 splice variant COL3-9B-2.Collagenase 3 precursor                                                                                                                     | CGVPDGEYNYVFR                             | b                        |
| IP100375952       | Complement C1Q tumor necrosis factor-related protein 8 precursor                                                                                                                   | CLLPSAFLMPR                               | b                        |
| IP100012759       | Complexin-2                                                                                                                                                                        | AALEQCEGSLTRPK                            | c; d                     |

| IPI Accession No. | Protein Description                                                                                                                        | Peptide Sequence*                | Primary Source Dataset** |
|-------------------|--------------------------------------------------------------------------------------------------------------------------------------------|----------------------------------|--------------------------|
| IP10029812        | Coronin 2B                                                                                                                                 | NVHDNHFCVNTNR                    | b                        |
| IP10029812        | Coronin 2B                                                                                                                                 | YCGHQGNVLDIK                     | b                        |
| IP10010133        | Coronin-like protein p57                                                                                                                   | HLEEPSLQELDTSSGVLLPFFDPDNTIVLCGK | b                        |
| IP100017601       | CP Ceruloplasmin precursor                                                                                                                 | EHEGAIYPDNTDFQR                  | f; g                     |
| IP100017601       | CP Ceruloplasmin precursor                                                                                                                 | GAYPLSIEPIGVR                    | f; g                     |
| IP100017601       | CP Ceruloplasmin precursor                                                                                                                 | ELHHLQEQNVSNAFLDK                | f; g                     |
| IP100017601       | CP Ceruloplasmin precursor                                                                                                                 | ELHHLQEQNVSNAFLDKGEFYIGSK        | g                        |
| IP100017601       | CP Ceruloplasmin precursor                                                                                                                 | ENLTAPGSDSAVFEQGTTR              | f; g                     |
| IP100017601       | CP Ceruloplasmin precursor                                                                                                                 | IGGSYKLVYR                       | g                        |
| IP100017601       | CP Ceruloplasmin precursor                                                                                                                 | QSEDSTFYLGER                     | g                        |
| IP100017601       | CP Ceruloplasmin precursor                                                                                                                 | HSHGITYKEHEGAIYPDNTDFQR          | g                        |
| IP100017601       | CP Ceruloplasmin precursor                                                                                                                 | TKENLTAPGSDSAVFEQGTTR            | g                        |
| IP100783366       | CPAMD8 Isoform 1 of C3 and PZP-like alpha-2-macroglobulin domain-containing protein 8 precursor; CPAMD8 Isoform 2 of C3 and PZP-like a     | AGVEEVISVTFNSPR                  | f                        |
| IP100329775       | CPB2 Isoform 1 of Carboxypeptidase B2 precursor                                                                                            | QVHFFVNSADVNDVK                  | g                        |
| IP100027078       | CPD Carboxypeptidase D precursor                                                                                                           | SEGAIQVNFVLR                     | f                        |
| IP100031121       | CPE Carboxypeptidase E precursor                                                                                                           | DLQGNPIANATISVEGIDHDVTSK         | f; g                     |
| IP100031121       | CPE Carboxypeptidase E precursor                                                                                                           | GNETIVNLHISTR                    | f; g                     |
| IP100031121       | CPE Carboxypeptidase E precursor                                                                                                           | PIANATISVEGIDHDVTSK              | f; g                     |
| IP100031121       | CPE Carboxypeptidase E precursor                                                                                                           | VEGDHDVTSK                       | g                        |
| IP100026270       | CPM Carboxypeptidase M precursor                                                                                                           | NFPDAFENNVSR                     | f; g                     |
| IP100026270       | CPM Carboxypeptidase M precursor                                                                                                           | TVAQNSVSTHLSIGK                  | f                        |
| IP100418747       | CPT1C Isoform 2 of Carnitine O-palmitoyltransferase 1, brain isoform; CPT1C Isoform 1 of Carnitine O-palmitoyltransferase 1, brain isoform | AAMSGQGVDR                       | h                        |
| IP100301395       | CPVL Probable serine carboxypeptidase CPVL precursor                                                                                       | QAIHVGNQTFNDGTIVEK               | i                        |
| IP100024638       | Creatine kinase, ubiquitous mitochondrial precursor                                                                                        | GWPEFMWNERLGYILTCPSNLGTGLR       | b                        |
| IP100024638       | Creatine kinase, ubiquitous mitochondrial precursor                                                                                        | HNNCMASHLTPAVYAR                 | b; d                     |
| IP100024638       | Creatine kinase, ubiquitous mitochondrial precursor                                                                                        | TTPTGTWLDQCIQTGVDPNGHPFIK        | b; d                     |
| IP100874212       | CREG1 27 kDa protein                                                                                                                       | IVTPEEYVNT                       | f                        |
| IP100874212       | CREG1 27 kDa protein                                                                                                                       | LNTNIWVLDVFGGPK                  | f; g                     |
| IP100414123       | CRMP1 Dihydropyrimidinase-related protein 1                                                                                                | SIPHITSDR                        | h                        |
| IP100414123       | CRMP1 Dihydropyrimidinase-related protein 1                                                                                                | YATPAPSAKSSPSK                   | h                        |
| IP100011218       | CSF1R Macrophage colony-stimulating factor 1 receptor precursor                                                                            | HTNYSFSPWHGFTIHR                 | g                        |
| IP100011218       | CSF1R Macrophage colony-stimulating factor 1 receptor precursor                                                                            | VYVGPALTLVPAELVYR                | g                        |
| IP100011218       | CSF1R Macrophage colony-stimulating factor 1 receptor precursor                                                                            | VTVQSLTLVTELEHNQTYEGR            | g                        |
| IP100394770       | CSMD2 CSMD2 protein                                                                                                                        | GFNITFTFR                        | f                        |
| IP100979856       | CSRPI cDNA FLJ16406 fis, clone UTERU206142, highly similar to Cysteine and glycine-rich protein 1; CSRPI Cysteine and glycine-rich prot    | GFGFGQAGALVHSE                   | d; h                     |
| IP100022827       | CTCL tumor antigen sc20-9 (BA16H23.1.2) (Protein kinase KIAA0204,Hypothetical protein KIAA0204,HSLK (BA16H23.1.1) (Protein kinase K        | CHLLVEHETQK                      | b                        |
| IP100927799       | CTNNB1 cDNA FLJ57878, highly similar to Beta-catenin; CTNNB1 Isoform 1 of Catenin beta-1                                                   | RTSMGGTQQQFVEGVR                 | h                        |
| IP100879328       | CTSD 30 kDa protein; CTSD Cathepsin D precursor                                                                                            | GSLSYLNVTR                       | f; g                     |
| IP100879328       | CTSD 30 kDa protein; CTSD Cathepsin D precursor                                                                                            | NGTSDIHYGSGLSGYLSQDVTVPVCS       | f                        |
| IP100879328       | CTSD 30 kDa protein; CTSD Cathepsin D precursor                                                                                            | YYKGLSYLNVTR                     | f                        |
| IP100874147       | CXADR Uncharacterized protein CXADR (Fragment); CXADR Isoform 2 of Coxsackievirus and adenovirus receptor precursor; CXADR Isoform         | SGDASINVTNLQSLDGTQYCK            | f                        |
| IP100295240       | Cysteine desulfurase, mitochondrial precursor                                                                                              | CIOHYK                           | b                        |
| IP100016864       | Cytochrome c oxidase polypeptide I                                                                                                         | LYGCPPIYHTFEPPVYMK               | b                        |
| IP100021785       | Cytochrome c oxidase polypeptide Vb, mitochondrial precursor                                                                               | CGAHYK                           | b                        |
| IP100177728       | Cytosolic nonspecific dipeptidase                                                                                                          | TVCIYGHLDVQPALEDGWSEPFVLR        | b                        |
| IP100011200       | D-3-phosphoglycerate dehydrogenase                                                                                                         | ALVDHENIVSCPMLGASTK              | b                        |
| IP100011200       | D-3-phosphoglycerate dehydrogenase                                                                                                         | NAGNCLSPAIVGLLK                  | b                        |
| IP100005607       | DBC1 Isoform 1 of Deleted in bladder cancer protein 1 precursor                                                                            | SGNATQSVVALLQLASSYFVDR           | f                        |
| IP100025341       | D-beta-hydroxybutyrate dehydrogenase, mitochondrial precursor                                                                              | FGVEAFSDCLR                      | b; e                     |
| IP100293867       | D-dopachrome tautomerase                                                                                                                   | LCAAASAILGPKADR                  | b                        |
| IP100027547       | Dermicidin precursor (Preproteolysin) [Contains: Survival-promoting peptide; DCD-1]                                                        | YDPEAASAPGSGNPGHEASAAQK          | b                        |
| IP100031045       | Destrin                                                                                                                                    | ASGVQVADEVCR                     | b                        |
| IP100031045       | Destrin                                                                                                                                    | AVIFCLADKK                       | b                        |
| IP100031045       | Destrin                                                                                                                                    | CSTPEEIKK                        | b                        |
| IP100031045       | Destrin                                                                                                                                    | HECQANGPEDLNR                    | b                        |
| IP100031045       | Destrin                                                                                                                                    | HFVGMPLPEKDCR                    | b                        |
| IP100031045       | Destrin                                                                                                                                    | KCSTPEEIK                        | b                        |
| IP100031045       | Destrin                                                                                                                                    | KCSTPEEIKK                       | b                        |
| IP10014439        | Dihydropteridine reductase                                                                                                                 | AALDGTGPMIGYGMK                  | c; d                     |
| IP100257508       | Dihydropyrimidinase-related protein 2                                                                                                      | AALAGGTTMIDHVVPEPGTSLAAAFDQWR    | d; e                     |
| IP100021230       | DI68D1.8.2.5 (CD44 antigen,CD44 antigen,DI68D1.8.2.4 (CD44 antigen,Splice isoform CD44 of P16070 CD44 antigen precursor                    | ALSIGFETCR                       | b                        |
| IP100002714       | DKK3 Dickkopf-related protein 3 precursor                                                                                                  | ASSEVNLANLPPSYHNENTDTDK          | g                        |
| IP100002714       | DKK3 Dickkopf-related protein 3 precursor                                                                                                  | ETVITSVGDEEGR                    | g                        |
| IP100002714       | DKK3 Dickkopf-related protein 3 precursor                                                                                                  | GSNGTICDNQR                      | g                        |
| IP100002714       | DKK3 Dickkopf-related protein 3 precursor                                                                                                  | ITNQTQMVIF                       | f; g                     |
| IP100002714       | DKK3 Dickkopf-related protein 3 precursor                                                                                                  | ITNQTQMVIFSETVITSVGDEEGR         | f; g                     |
| IP100002714       | DKK3 Dickkopf-related protein 3 precursor                                                                                                  | ITNQTQMVIFSETVITSVGDEEGR         | g                        |
| IP100002714       | DKK3 Dickkopf-related protein 3 precursor                                                                                                  | SETVITSVGDEEGR                   | f; g                     |
| IP100002714       | DKK3 Dickkopf-related protein 3 precursor                                                                                                  | YGNNTIHWHR                       | f; g                     |
| IP100002714       | DKK3 Dickkopf-related protein 3 precursor                                                                                                  | YITSVGDEEGR                      | g                        |
| IP100294728       | DMXL1 DnaX-like protein 1                                                                                                                  | QEEIQETFIK                       | g                        |
| IP100217669       | DNA ligase IV                                                                                                                              | AAEIVPSDMYK                      | a                        |
| IP100066511       | DNA polymerase theta                                                                                                                       | AADRGMPPFSISMR                   | a                        |
| IP100290889       | DNA topoisomerase I                                                                                                                        | KCVDKIR                          | b                        |
| IP100032406       | DnaI homolog subfamily A member 2                                                                                                          | IGLVEALCGFQTFK                   | b                        |
| IP100042231       | DNAJC5 Isoform 1 of DnaI homolog subfamily C member DNAJC5 Isoform 2 of DnaI homolog subfamily C member 5                                  | SLSTSGESLHYVLDLKD                | h                        |
| IP100333140       | DNER Delta and Notch-like epidermal growth factor-related receptor precursor                                                               | LVSEFVQNTSVK                     | g                        |
| IP100847414       | DPP10 dipeptidyl peptidase 10 isoform short                                                                                                | WINDTDVYK                        | f                        |
| IP100847414       | DPP10 dipeptidyl peptidase 10 isoform short; DPP10 DPPY splice variant c                                                                   | AGVNYTMQVYDEGHNVSEK              | f                        |
| IP100847414       | DPP10 dipeptidyl peptidase 10 isoform short; DPP10 DPPY splice variant c                                                                   | LNINATNTLLENTTFVTFK              | f                        |
| IP100301512       | DPP6 Isoform DPPX-L of Dipeptidyl aminopeptidase-like protein 6                                                                            | ANYSLQYPDESHYFTSSSLK             | f                        |
| IP100301512       | DPP6 Isoform DPPX-L of Dipeptidyl aminopeptidase-like protein 6                                                                            | AQNVSILTLCDATGVTCTK              | f                        |
| IP100301512       | DPP6 Isoform DPPX-L of Dipeptidyl aminopeptidase-like protein 6                                                                            | CEGPGVMVYHNTIDK                  | f                        |
| IP100301512       | DPP6 Isoform DPPX-L of Dipeptidyl aminopeptidase-like protein 6                                                                            | GKANYSLQYPDESHYFTSSSLK           | f                        |
| IP100301512       | DPP6 Isoform DPPX-L of Dipeptidyl aminopeptidase-like protein 6                                                                            | LAYAAINDSR                       | f                        |
| IP100301512       | DPP6 Isoform DPPX-L of Dipeptidyl aminopeptidase-like protein 6                                                                            | LWNVETNTSTVLEIGK                 | f                        |
| IP100883655       | DPYSL2 dihydropyrimidinase-related protein 2 isoform 1                                                                                     | TVTAPASAKTSPAK                   | h                        |
| IP100295624       | Drebrin 1 isoform b                                                                                                                        | AAAPQAWAGMEEPPQAQAPPR            | e                        |
| IP100030406       | Drebrin, Hypothetical protein                                                                                                              | CACASHVAK                        | b                        |
| IP100004970       | DRIM protein                                                                                                                               | GQNFILVNVCTK                     | b                        |
| IP100235412       | Dynamin 1-like,Dynamin-like protein,Dynamin-like protein Dymple isoform                                                                    | IIQHCSNVSTQELLR                  | b                        |
| IP100012033       | Dynamin-1                                                                                                                                  | IREPCLK                          | b                        |
| IP100290982       | Dynein heavy chain, cytosolic                                                                                                              | EAIVNSCVFVHQTLHQANAR             | b                        |
| IP100290982       | Dynein heavy chain, cytosolic                                                                                                              | IQFVGCANPPTDPCR                  | b                        |
| IP100290982       | Dynein heavy chain, cytosolic                                                                                                              | LCDEQLSSSHYDFGLR                 | b                        |
| IP100290982       | Dynein heavy chain, cytosolic                                                                                                              | LHSLQPHACFR                      | b                        |
| IP100219252       | DYRK1A Isoform 4 of Dual specificity tyrosine-Phosphorylation-regulated kinase 1A; DYRK1A Isoform 2 of Dual specificity tyrosine-Phospho   | IVQVIQSR                         | h                        |

| UPI Accession No. | Protein Description                                                                                                                               | Peptide Sequence*            | Primary Source Dataset** |
|-------------------|---------------------------------------------------------------------------------------------------------------------------------------------------|------------------------------|--------------------------|
| IP00018274        | EGFR Isoform 1 of Epidermal growth factor receptor precursor                                                                                      | DSLISINATNK                  | f; g                     |
| IP00032875        | Electron transfer flavoprotein-ubiquinone oxidoreductase, mitochondrial precursor                                                                 | AAQIGAHITLHGCLDPGAFK         | b                        |
| IP00032875        | Electron transfer flavoprotein-ubiquinone oxidoreductase, mitochondrial precursor                                                                 | LQNAQNCVHCK                  | b                        |
| IP00289849        | ELFN2 Leucine-rich repeat and fibronectin type-III domain-containing protein 6 precursor                                                          | FGNLTDLNLTK                  | f                        |
| IP00025447        | Elongation factor 1-alpha 1                                                                                                                       | DGNASGTLLLEALDCILPPTPTDK     | b                        |
| IP00025447        | Elongation factor 1-alpha 1                                                                                                                       | DGNASGTLLLEALDCILPPTPTDKPLR  | b                        |
| IP00025447        | Elongation factor 1-alpha 1                                                                                                                       | KDGNASGTLLLEALDCILPPTPTDKPLR | b                        |
| IP00025447        | Elongation factor 1-alpha 1                                                                                                                       | SGDAIVDMVPGKPMCVESFSDYPLGR   | b                        |
| IP00023048        | Elongation factor 1-delta,Hypothetical protein,Elongation factor 1-beta,similar to eukaryotic translation elongation factor 1 beta 2,IP00164838.2 | KLQIQCVVDDK                  | b                        |
| IP00186290        | Elongation factor 2                                                                                                                               | TFCQLILDPIFK                 | b                        |
| IP00027107        | Elongation factor tu, mitochondrial precursor                                                                                                     | GDECELLGHSK                  | b                        |
| IP00027230        | Endoplasmic precursor                                                                                                                             | GVEVYLTEPVDEYCIQALPEFDGKR    | b                        |
| IP00027230        | Endoplasmic precursor                                                                                                                             | KGVEVYLTEPVDEYCIQALPEFDGK    | b                        |
| IP000465248       | ENO1 Isoform alpha-enolase of Alpha-enolase                                                                                                       | VNQGVSYESLQACK               | d                        |
| IP000216171       | ENO2 Gamma-enolase                                                                                                                                | DGKYDLDFKSPTDPSR             | b                        |
| IP00024993        | Enoyl-CoA hydratase, mitochondrial precursor                                                                                                      | ALNALDCGLDELNLQALK           | b                        |
| IP000878576       | ENPP2 Autotaxin isoform gamma; ENPP2 Isoform 2 of Ectonucleotide pyrophosphatase/phosphodiesterase family member 2 precursor; ENPP2 Isoform 1     | AHIANLTK                     | g                        |
| IP00030210        | ENPP2 Isoform 2 of Ectonucleotide pyrophosphatase/phosphodiesterase family member 2 precursor                                                     | GLKPAFNNHGHSLNHLR            | g                        |
| IP00157414        | ENPP6 Ectonucleotide pyrophosphatase/phosphodiesterase family member 6 precursor                                                                  | EMLPWFNMSTGR                 | f; g                     |
| IP00025297        | ENTPD3 Ectonucleoside triphosphate diphosphohydrolase 3                                                                                           | LQNETAANEVLESIQSYFK          | f; g                     |
| IP00046651        | EPB41L1 cDNA FLJ61657, highly similar to Band 4.1-like protein 1; EPB41L1 Isoform 1 of Band 4.1-like protein 1                                    | AQKSPQK                      | h                        |
| IP000922914       | EPB41L3 Uncharacterized protein                                                                                                                   | TESGSDSEKPDQEAEPQEAAGAQR     | h                        |
| IP000922914       | EPB41L3 Uncharacterized protein; EPB41L3 Isoform A of Band 4.1-like protein 3                                                                     | SGSDSEKPDQEAEPQEAAGAQR       | h                        |
| IP01015007        | EPB49 Isoform Short of Dematin; EPB49 Uncharacterized protein; EPB49 Uncharacterized protein; EPB49 Uncharacterized protein; EPB49 dema           | STSPPPSPPEVWADSR             | h                        |
| IP000556409       | EPB49 Uncharacterized protein                                                                                                                     | GAEVEEEDDDSGEEMK             | h                        |
| IP000556409       | EPB49 Uncharacterized protein; EPB49 Isoform Long of Dematin                                                                                      | RGAEVEEEDDDSGEEMK            | h                        |
| IP000134521       | EPRS Bifunctional aminocycl-RNA synthetase                                                                                                        | EYIPQPPLSQSSDSSPTR           | h                        |
| IP000872773       | ERO1L Uncharacterized protein ERO1L; ERO1L ERO1-like protein alpha precursor                                                                      | WGHNITEPQQR                  | f                        |
| IP000376005       | Eukaryotic initiation factor 5A isoform 1 variant A,Eukaryotic translation initiation factor 5A,,Eukaryotic translation initiation factor 5AII    | KYEDICPSTHNDMDVPMK           | b                        |
| IP000376005       | Eukaryotic initiation factor 5A isoform 1 variant A,Eukaryotic translation initiation factor 5A,,Eukaryotic translation initiation factor 5AII    | YEDICPSTHNDMDVPMK            | b                        |
| IP00012795        | Eukaryotic translation initiation factor 3 subunit 2                                                                                              | HVLTGSADNSCR                 | b                        |
| IP00022648        | Eukaryotic translation initiation factor 5                                                                                                        | FVLCPECCNETDHLVNP            | b                        |
| IP00022648        | Eukaryotic translation initiation factor 5                                                                                                        | KQTIGNSCK                    | b                        |
| IP00015473        | Excitatory amino acid transporter 1                                                                                                               | NMEFPPNLVEACFK               | b; d; e                  |
| IP00015473        | Excitatory amino acid transporter 1,Neutral amino acid transporter A                                                                              | CIEENGVDKR                   | b                        |
| IP00300020        | Excitatory amino acid transporter 2                                                                                                               | CLEENLGDKR                   | b                        |
| IP00300020        | Excitatory amino acid transporter 2                                                                                                               | ESNNQCVYAHSNVIVDECK          | b                        |
| IP00300020        | Excitatory amino acid transporter 2                                                                                                               | NLPFNLYQACFQIQIVTK           | b                        |
| IP00289861        | exportin 1                                                                                                                                        | LDELNLNVDVCLYHGEGAQQR        | b                        |
| IP00019568        | F2 Prothrombin precursor (Fragment)                                                                                                               | YPHKPEINSTHFGADLQENFCR       | a                        |
| IP000384454       | F3 Tissue factor                                                                                                                                  | NNTFLSLR                     | f; g                     |
| IP00031411        | FAT Protocadherin Fat 1 precursor                                                                                                                 | GGNTAHLNR                    | f                        |
| IP00031411        | FAT Protocadherin Fat 1 precursor                                                                                                                 | GQIFLTK                      | f                        |
| IP000419327       | Fat-like cadherin FAT1 protein                                                                                                                    | AAANEQK                      | a                        |
| IP000021089       | Fatty acid transport protein                                                                                                                      | AAIVVHSRYR                   | a                        |
| IP000328113       | FBN1 Fibrillin-1 precursor                                                                                                                        | NCTDDECR                     | f; g                     |
| IP000328113       | FBN1 Fibrillin-1 precursor                                                                                                                        | NYVADNQTCDGELLFNMTK          | f; g                     |
| IP000328113       | FBN1 Fibrillin-1 precursor                                                                                                                        | VLPVNVTVYCOLVR               | f; g                     |
| IP000242956       | FCGBP IgGfC-binding protein precursor                                                                                                             | GNSPAVSVR                    | g                        |
| IP000242956       | FCGBP IgGfC-binding protein precursor                                                                                                             | SVTLQIYNHSLTSAR              | g                        |
| IP000242956       | FCGBP IgGfC-binding protein precursor                                                                                                             | VYVTAALGTSIHSKDEJGK          | g                        |
| IP000242956       | FCGBP IgGfC-binding protein precursor                                                                                                             | YLPVNSLLTSDCSER              | g                        |
| IP000788189       | FCGBP similar to Fc fragment of IgG binding protein; FCGBP IgGfC-binding protein precursor                                                        | VITVQVANFTLR                 | f                        |
| IP000376766       | Ferritin light polypeptide variant                                                                                                                | AAMALEK                      | c                        |
| IP000902755       | FGA FGA protein (Fragment); FGA Uncharacterized protein; FGA Isoform 2 of Fibrinogen alpha chain; FGA Isoform 1 of Fibrinogen alpha chain         | ADSGEGDFAEAGGVRR             | h                        |
| IP000877792       | FGG 50 kDa protein; FGG 52 kDa protein; FGG Isoform Gamma-A of Fibrinogen gamma chain precursor; FGG Isoform Gamma-B of Fibrinogen                | DLQSEDLHLQYENK               | f; g                     |
| IP000877792       | FGG 50 kDa protein; FGG 52 kDa protein; FGG Isoform Gamma-A of Fibrinogen gamma chain precursor; FGG Isoform Gamma-B of Fibrinogen                | VDKDLQSEDLHLQYENK            | f; g                     |
| IP000298497       | Fibrinogen beta chain precursor (Contains: Fibrinopeptide B)                                                                                      | CHAANPNGR                    | b                        |
| IP000217009       | FK506-binding protein 1A                                                                                                                          | RGQTQVHVYTGMLDQK             | b                        |
| IP000217009       | FK506-binding protein 1A                                                                                                                          | RGQTQVHVYTGMLDQK             | b                        |
| IP000219910       | Flavin reductase                                                                                                                                  | CLTDEVDGHSYPSHQYQ            | b                        |
| IP00002320        | FLRT3 Leucine-rich repeat transmembrane protein FLRT3 precursor                                                                                   | VFFNLNLTELSLR                | f                        |
| IP000292732       | FMOD fibromodulin precursor                                                                                                                       | LYLDHNNLTK                   | f; g                     |
| IP000292732       | FMOD fibromodulin precursor                                                                                                                       | MPGPLRSLR                    | g                        |
| IP000845263       | FN1 fibronectin 1 isoform 2 preproprotein                                                                                                         | DQCIVDDITYVNDITFK            | f                        |
| IP000845263       | FN1 fibronectin 1 isoform 2 preproprotein                                                                                                         | WTPLSNITGYR                  | f                        |
| IP000855785       | FN1 Isoform 15 of Fibronectin precursor; FN1 fibronectin 1 isoform 2 preproprotein; FN1 Isoform 7 of Fibronectin precursor                        | LDAPTLNLFQVNETDSTVLR         | f; g                     |
| IP000465439       | Fructose-bisphosphate aldolase A                                                                                                                  | AAQEEYVK                     | c; d                     |
| IP000465439       | Fructose-bisphosphate aldolase A                                                                                                                  | AAQEEYVKR                    | c                        |
| IP00180818        | Fructose-bisphosphate aldolase A,aldolase A                                                                                                       | ALSDHHIYEGTLTKPNMVTGHAQTQK   | b                        |
| IP00180818        | Fructose-bisphosphate aldolase A,aldolase A                                                                                                       | CPILLKFWALTF                 | b                        |
| IP00180818        | Fructose-bisphosphate aldolase A,aldolase A                                                                                                       | CPILLKFWALTFSYGR             | b                        |
| IP00180818        | Fructose-bisphosphate aldolase A,aldolase A                                                                                                       | MVTPGHAQTQK                  | b                        |
| IP00180818        | Fructose-bisphosphate aldolase A,aldolase A                                                                                                       | RALANLACQK                   | b                        |
| IP00180818        | Fructose-bisphosphate aldolase A,aldolase A                                                                                                       | VNPGCGVILFHETLYQK            | b; d                     |
| IP000294650       | FRZB Secreted frizzled-related protein 3 precursor                                                                                                | SLPWNMTK                     | g                        |
| IP00029723        | FSTL1 Follistatin-related protein 1 precursor                                                                                                     | FVEQNETAINITVPDQENK          | g                        |
| IP000088600       | FUT9 Alpha-(1,3)-fucosyltransferase                                                                                                               | SGEHLFNLTLYR                 | f; g                     |
| IP00002756        | GABBR1 Isoform 1A of Gamma-aminobutyric acid type B receptor subunit 1 precursor                                                                  | LEDFNYYNQTITDQIYR            | f                        |
| IP000296373       | GABBR1 Isoform 1C of Gamma-aminobutyric acid type B receptor subunit 1 precursor; GABBR1 Isoform 1A of Gamma-aminobutyric acid type               | AMNSNFEFVSGVGVDFASGR         | f                        |
| IP00169235        | GABBR1 Seven transmembrane helix receptor                                                                                                         | SISNMSQEFVEK                 | f                        |
| IP00027250        | GABBR2 Gamma-aminobutyric acid type B receptor subunit 2 precursor                                                                                | GVLPVAVELAEIQRNESLLRPY       | f; g                     |
| IP00027250        | GABBR2 Gamma-aminobutyric acid type B receptor subunit 2 precursor                                                                                | IQDFNYDHTLGR                 | f                        |
| IP00027250        | GABBR2 Gamma-aminobutyric acid type B receptor subunit 2 precursor                                                                                | VGEYNAVADTLEINDTIR           | f                        |
| IP00026631        | GABRA2 Gamma-aminobutyric acid receptor subunit alpha-2 precursor                                                                                 | NNTIFTR                      | f                        |
| IP00002897        | GABRA3 Gamma-aminobutyric acid receptor subunit alpha-3 precursor                                                                                 | HAPDIPDDSDNITIFTR            | f                        |
| IP000299122       | GABBR1 Gamma-aminobutyric acid receptor subunit beta-1 precursor                                                                                  | LSVSGIPLNLTDNR               | f                        |
| IP000216394       | GABBR2 Isoform Long of Gamma-aminobutyric acid receptor subunit beta-2 precursor; GABBR2 Isoform Short of Gamma-aminobutyric acid re              | LSVNYIPLNLTDNR               | f                        |
| IP000470817       | GABBR3 Putative uncharacterized protein DKFp781L0846; GABBR3 Isoform 2 of Gamma-aminobutyric acid receptor subunit beta-3 precursor               | EVHNEHMEVSGGIDTR             | f                        |
| IP00015964        | GAP43 Neuromodulin                                                                                                                                | AGSAETESATKASTDINSFSK        | h                        |
| IP00015964        | GAP43 Neuromodulin                                                                                                                                | ASTDINSFSSKAEDAFAKEEPK       | h                        |
| IP000795257       | GAPDH 32 kDa protein; GAPDH Glyceraldehyde-3-phosphate dehydrogenase                                                                              | PITIFQER                     | f; g                     |
| IP000219018       | GAPDH Glyceraldehyde-3-phosphate dehydrogenase                                                                                                    | LISWYDNEFG                   | f                        |
| IP000219018       | GAPDH Glyceraldehyde-3-phosphate dehydrogenase                                                                                                    | YDIVAINDPFDLN                | f                        |
| IP000219018       | GAPDH Glyceraldehyde-3-phosphate dehydrogenase                                                                                                    | YGVNGFGR                     | f; g                     |
| IP000031583       | General vesicular transport factor p115                                                                                                           | CQNEQLQATVQQYSQIQHK          | b                        |
| IP000031583       | General vesicular transport factor p115                                                                                                           | NLVSFTNPPGATSSCK             | b                        |

| IPI Accession No. | Protein Description                                                                                                                                                                                        | Peptide Sequence*                     | Primary Source Dataset** |
|-------------------|------------------------------------------------------------------------------------------------------------------------------------------------------------------------------------------------------------|---------------------------------------|--------------------------|
| IP100184477       | Gephyrin,Gephyrin                                                                                                                                                                                          | <b>GSQECFQFILPALPHADLLR</b>           | b                        |
| IP100443478       | GFAP Isoform 3 of Glial fibrillary acidic protein                                                                                                                                                          | <b>LGPTRISLAR</b>                     | f; g                     |
| IP100443478       | GFAP Isoform 3 of Glial fibrillary acidic protein; GFAP Isoform 2 of Glial fibrillary acidic protein; GFAP Isoform 1 of Glial fibrillary acidic protein                                                    | <b>QQVHVELDVAKPDLTAALK</b>            | f; g                     |
| IP100018901       | GGT1 Isoform 1 of Gamma-glutamyltranspeptidase 1 precursor                                                                                                                                                 | <b>LHNQLLPNVTVTER</b>                 | f; g                     |
| IP100339364       | GGT1 65 kDa protein                                                                                                                                                                                        | <b>AAAVAQDGFNVTHDLAR</b>              | f; g                     |
| IP100455154       | Glutamate [NMDA] receptor subunit 3A                                                                                                                                                                       | <b>AASRAPDDSRAGAQR</b>                | a                        |
| IP100012796       | Glutamate decarboxylase, 65 kDa isoform                                                                                                                                                                    | <b>ALQCCR</b>                         | b                        |
| IP100012796       | Glutamate decarboxylase, 65 kDa isoform                                                                                                                                                                    | <b>CLELAEVLNDIK</b>                   | b                        |
| IP100012796       | Glutamate decarboxylase, 65 kDa isoform                                                                                                                                                                    | <b>E EGLMQNCNQMHASYL FQ QDK</b>       | b                        |
| IP100012796       | Glutamate decarboxylase, 65 kDa isoform                                                                                                                                                                    | <b>KAACACDQKPCSKK</b>                 | b                        |
| IP100012796       | Glutamate decarboxylase, 65 kDa isoform                                                                                                                                                                    | <b>LCALLYGDAEKPAESGGSQPPR</b>         | b                        |
| IP100016801       | Glutamate dehydrogenase 1, mitochondrial precursor                                                                                                                                                         | <b>ACVTGKPSIQQGIHGR</b>               | b                        |
| IP100016801       | Glutamate dehydrogenase 1, mitochondrial precursor                                                                                                                                                         | <b>AKPYEGSILEADCDLIPAASEK</b>         | b                        |
| IP100016801       | Glutamate dehydrogenase 1, mitochondrial precursor                                                                                                                                                         | <b>IKPCNVHLSLSPFIR</b>                | b                        |
| IP100293975       | Glutathione peroxidase 1                                                                                                                                                                                   | <b>CEVNGAGAHLPLFAFLR</b>              | b                        |
| IP100219067       | Glutathione S-transferase M2                                                                                                                                                                               | <b>HNLCGESEK</b>                      | b                        |
| IP100219067       | Glutathione S-transferase M2                                                                                                                                                                               | <b>KHNLGGESEK</b>                     | b                        |
| IP100246975       | Glutathione S-transferase Mu 3                                                                                                                                                                             | <b>CLDEFNPK</b>                       | b                        |
| IP100246975       | Glutathione S-transferase Mu 3                                                                                                                                                                             | <b>KHNMCGETEEEEK</b>                  | b                        |
| IP100246975       | Glutathione S-transferase Mu 3                                                                                                                                                                             | <b>LCYSSDHEK</b>                      | b                        |
| IP100019755       | Glutathione transferase omega 1                                                                                                                                                                            | <b>FCPFAER</b>                        | b                        |
| IP100019755       | Glutathione transferase omega 1                                                                                                                                                                            | <b>LNCEVDHTPK</b>                     | b                        |
| IP100219018       | Glyceraldehyde-3-phosphate dehydrogenase                                                                                                                                                                   | <b>AAFNSGK</b>                        | c; d; e                  |
| IP100004358       | Glycogen phosphorylase, brain form                                                                                                                                                                         | <b>FGCRDPVR</b>                       | b                        |
| IP100004358       | Glycogen phosphorylase, brain form                                                                                                                                                                         | <b>INMAHLCVIGSHAVNGVAR</b>            | b                        |
| IP100004358       | Glycogen phosphorylase, brain form                                                                                                                                                                         | <b>RWLLLCNPLGLADTIVEK</b>             | b                        |
| IP100184363       | Glycolipid transfer protein                                                                                                                                                                                | <b>QIETGPLEAVSHLPFFDCLGSPVFTPIK</b>   | b                        |
| IP100184363       | Glycolipid transfer protein                                                                                                                                                                                | <b>SHLPFFDCLGSPVFTPIK</b>             | b                        |
| IP100184363       | Glycolipid transfer protein                                                                                                                                                                                | <b>FIQVFLQICDGER</b>                  | b                        |
| IP100013230       | Glycyl-tRNA synthetase                                                                                                                                                                                     | <b>NGECFR</b>                         | b                        |
| IP100037448       | Glyoxylate reductase                                                                                                                                                                                       | <b>GVAAGHLLCLLSDHVDK</b>              | b                        |
| IP100037448       | Glyoxylate reductase                                                                                                                                                                                       | <b>NCVLIPIHGSATHR</b>                 | b                        |
| IP100009844       | GMP reductase 2.Human full-length cDNA clone CS0DH01Y08 of T cells (Jurkat cell line) of Homo sapiens                                                                                                      | <b>GHSIDGSCPCPGDYAK</b>               | b                        |
| IP100187158       | GPM6B glycoprotein M6B isoform 1                                                                                                                                                                           | <b>SPQITNGTGEVQICVDIR</b>             | f; g                     |
| IP100470529       | GPNMB Isoform 1 of Transmembrane glycoprotein NMB precursor                                                                                                                                                | <b>DLPIMFVLIHDPHFNLNYSINIK</b>        | f; g                     |
| IP100470529       | GPNMB Isoform 1 of Transmembrane glycoprotein NMB precursor; GPNMB Isoform 2 of Transmembrane glycoprotein NMB precursor                                                                                   | <b>VSVNTANVTLGQPLMEVTVYR</b>          | f; g                     |
| IP100412541       | GPR158 Probable G-protein coupled receptor 158 precursor                                                                                                                                                   | <b>ILLQDSSSAPHLANATLETFHGLR</b>       | f; g                     |
| IP100032405       | GPR37L1 Endothelin B receptor-like protein 2 precursor                                                                                                                                                     | <b>GNLTGAPGQR</b>                     | f; g                     |
| IP100332155       | GPRIN1 Isoform 1 of G protein-regulated inducer of neurite outgrowth 1                                                                                                                                     | <b>VGSLPLKESGVPVTTTK</b>              | h                        |
| IP100219124       | GRIA1 Isoform Flip of Glutamate receptor 1 precursor                                                                                                                                                       | <b>TNVTLHVIEMK</b>                    | f                        |
| IP100030880       | GRIA1 Isoform Flop of Glutamate receptor 1 precursor                                                                                                                                                       | <b>ESGANVTGQLVNYDTIPAK</b>            | f                        |
| IP100871510       | GRIA2 Isoform 3 of Glutamate receptor 2 precursor                                                                                                                                                          | <b>INVTINIMELK</b>                    | f                        |
| IP100871510       | GRIA2 Isoform 3 of Glutamate receptor 2 precursor                                                                                                                                                          | <b>RINVTINIMELK</b>                   | f                        |
| IP100871510       | GRIA2 Isoform 3 of Glutamate receptor 2 precursor; GRIA2 Isoform Flip of Glutamate receptor 2 precursor                                                                                                    | <b>IQFQGVNSGFGQVVDYDLSVSK</b>         | f                        |
| IP100011397       | GRIK3 Glutamate receptor, ionotropic kainate 3 precursor                                                                                                                                                   | <b>EASALGIQK</b>                      | g                        |
| IP100647309       | GRIN1 Glutamate receptor, ionotropic, N-methyl D-aspartate 1                                                                                                                                               | <b>KLTVQVGIYNGTHVIPNDR</b>            | f                        |
| IP100789973       | GRIN1 Glutamate receptor, ionotropic, N-methyl D-aspartate 1                                                                                                                                               | <b>NVTALLMEAK</b>                     | f                        |
| IP100647309       | GRIN1 Glutamate receptor, ionotropic, N-methyl D-aspartate 1                                                                                                                                               | <b>TMNFTYEVHIVADGK</b>                | f                        |
| IP100646891       | GRIN1 Glutamate receptor, ionotropic, N-methyl D-aspartate 1; GRIN1 Isoform 5 of Glutamate [NMDA] receptor subunit zeta-1 precursor; GRIN1 Isoform 4 of Glutamate [NMDA] receptor subunit zeta-1 precursor | <b>QNVSLILK</b>                       | f                        |
| IP100029768       | GRIN2A Glutamate [NMDA] receptor subunit epsilon-1 precursor                                                                                                                                               | <b>WENHTLSLR</b>                      | f; g                     |
| IP100297933       | GRIN2B Glutamate [NMDA] receptor subunit epsilon-2 precursor                                                                                                                                               | <b>QKDSGWKR</b>                       | f                        |
| IP100297933       | GRIN2B Glutamate [NMDA] receptor subunit epsilon-2 precursor                                                                                                                                               | <b>VELVAMNETDPK</b>                   | f                        |
| IP100297933       | GRIN2B Glutamate [NMDA] receptor subunit epsilon-2 precursor                                                                                                                                               | <b>YLINVTFEGR</b>                     | f                        |
| IP100793829       | GRM3 99 kDa protein; GRM3 Metabotropic glutamate receptor 3 precursor                                                                                                                                      | <b>FFNWTYVSTVASEDGYGETGIEAFQEAR</b>   | f; g                     |
| IP100745954       | GRM7 Isoform 3 of Metabotropic glutamate receptor 7 precursor; GRM7 Isoform 1 of Metabotropic glutamate receptor 7 precursor; GRM7 Isoform 2 of Metabotropic glutamate receptor 7 precursor                | <b>YDFIQYQTNTNSPGYR</b>               | f                        |
| IP100880060       | GSK3A Uncharacterized protein; GSK3A Glycogen synthase kinase-3 alpha; GSK3B Isoform 2 of Glycogen synthase kinase-3 beta; GSK3B Isoform 1 of Glycogen synthase kinase-3 beta                              | <b>GEPNVSICSR</b>                     | h                        |
| IP100023625       | Guanine nucleotide-binding protein G(I)/G(S)/G(O) gamma-3 subunit precursor                                                                                                                                | <b>AAADMLTYCDAAHACEDPLTIPVTSNPFPR</b> | d                        |
| IP100028509       | Guanine nucleotide-binding protein G(I)/G(S)/G(O) gamma-7 subunit precursor                                                                                                                                | <b>AASDLMSCYCEQOAR</b>                | c                        |
| IP100244567       | Guanine nucleotide-binding protein G(I)/G(S)/G(O) gamma-2 subunit                                                                                                                                          | <b>AAADLMAVCEAHAK</b>                 | b; d                     |
| IP100030058       | Guanine nucleotide-binding protein G(I)/G(S)/G(O) gamma-4 subunit                                                                                                                                          | <b>YSQAADLLAYCEAHVR</b>               | b                        |
| IP100026268       | Guanine nucleotide-binding protein G(I)/G(S)/G(T) beta subunit 1                                                                                                                                           | <b>ITISVFSKSGRLLAGYDDFNCNVWDALK</b>   | b                        |
| IP100026268       | Guanine nucleotide-binding protein G(I)/G(S)/G(T) beta subunit 1                                                                                                                                           | <b>LLLAGYDDFNCNVWDALK</b>             | b                        |
| IP100410714       | HBA2:HBA1 Hemoglobin subunit alpha                                                                                                                                                                         | <b>PHFDLSHGSAAQV</b>                  | f; g                     |
| IP100884107       | HBB Beta-globin gene from a thalassemia patient; HBB Hemoglobin subunit beta                                                                                                                               | <b>LLGNVLYCVLAHFVKG</b>               | f; g                     |
| IP100654755       | HBB Hemoglobin subunit beta                                                                                                                                                                                | <b>GTFATLSEIH</b>                     | f; g                     |
| IP100654755       | HBB Hemoglobin subunit beta                                                                                                                                                                                | <b>LLVVYPWTR</b>                      | a; c; d; g               |
| IP100643908       | HDFG cDNA FLJ53700, highly similar to Hepatoma-derived growth factor; HDFG hepatoma-derived growth factor isoform c; HDFG hepatoma-derived growth factor isoform b                                         | <b>GNAEGSSDEEGKLYDEPAK</b>            | h                        |
| IP100304925       | Heat shock 70 kDa protein 1,heat shock 70kDa protein 1B                                                                                                                                                    | <b>AAAGIDLGTTCVGVFQHGK</b>            | b                        |
| IP100304925       | Heat shock 70 kDa protein 1,heat shock 70kDa protein 1B                                                                                                                                                    | <b>ARPELCSDLFR</b>                    | b                        |
| IP100472102       | Heat shock protein 60                                                                                                                                                                                      | <b>AAVEEGVLGGCALLR</b>                | d                        |
| IP100007702       | Heat shock-related 70 kDa protein 2                                                                                                                                                                        | <b>GPAIGIDLGTTCVGVFQHGK</b>           | b                        |
| IP100022433       | Heat-shock 20 kDa like-protein p20                                                                                                                                                                         | <b>FGEGLLEAEALCPTTLPAPYLR</b>         | b                        |
| IP100167215       | HEPACAM Isoform 1 of Hepatocyte cell adhesion molecule                                                                                                                                                     | <b>QNSLEYMDQNDNR</b>                  | h                        |
| IP100167215       | HEPACAM Isoform 1 of Hepatocyte cell adhesion molecule precursor                                                                                                                                           | <b>DGKPLLNSDR</b>                     | f; g                     |
| IP100167215       | HEPACAM Isoform 1 of Hepatocyte cell adhesion molecule precursor                                                                                                                                           | <b>TINLTVDVPISR</b>                   | f; g                     |
| IP100167215       | HEPACAM Isoform 1 of Hepatocyte cell adhesion molecule precursor                                                                                                                                           | <b>VNITSPPR</b>                       | f; g                     |
| IP100027851       | HEXA Beta-hexosaminidase alpha chain precursor                                                                                                                                                             | <b>SAEGTFIFNK</b>                     | f                        |
| IP100239077       | Histidine triad nucleotide binding protein 1                                                                                                                                                               | <b>CAADLGLNK</b>                      | b                        |
| IP100239077       | Histidine triad nucleotide binding protein 1                                                                                                                                                               | <b>KCAADLGLNK</b>                     | b                        |
| IP100217467       | Histone H1.4                                                                                                                                                                                               | <b>AASGEAKPK</b>                      | c                        |
| IP100219038       | Histone H3.3                                                                                                                                                                                               | <b>FQSAAGALQEAAYLVGLFEDNLCAHAK</b>    | b                        |
| IP100026602       | HLA class I histocompatibility antigen, B-8 alpha chain precursor,HLA class I histocompatibility antigen, B-7 alpha chain precursor,HLA class I histocompatibility antigen, B-2 microglobulin precursor    | <b>TYCHVQHEGLPKPLTLR</b>              | b                        |
| IP100220684       | HNRNP3 Isoform 3 of Heterogeneous nuclear ribonucleoprotein DHRNP3 Isoform 1 of Heterogeneous nuclear ribonucleoprotein D0                                                                                 | <b>NEDEGHSNSSPR</b>                   | d; h                     |
| IP100442294       | HNT Neurotrophin variant 3                                                                                                                                                                                 | <b>LIFPNVSEHDYGNVT</b>                | f; g                     |
| IP100641737       | HP Haptoglobin precursor                                                                                                                                                                                   | <b>FLNHSNATAK</b>                     | g                        |
| IP100641737       | HP Haptoglobin precursor                                                                                                                                                                                   | <b>NHSNATAK</b>                       | f                        |
| IP100641737       | HP Haptoglobin precursor                                                                                                                                                                                   | <b>NLFLNHSNATAK</b>                   | f; g                     |
| IP100641737       | HP Haptoglobin precursor                                                                                                                                                                                   | <b>SCVAEYGVYVK</b>                    | g                        |
| IP100641737       | HP Haptoglobin precursor                                                                                                                                                                                   | <b>VVLHPNSYQVDGLIK</b>                | f; g                     |
| IP100641737       | HP Haptoglobin precursor; HP HP protein                                                                                                                                                                    | <b>MVSHNLTGATLINEQWLLTTAK</b>         | f; g                     |
| IP100641737       | HP Haptoglobin precursor; HP HP protein                                                                                                                                                                    | <b>VSHNLTGATLINEQWLLTTAK</b>          | f; g                     |
| IP100022488       | HPX Hemopexin precursor                                                                                                                                                                                    | <b>ALPQPQNVTSLL</b>                   | g                        |
| IP100022488       | HPX Hemopexin precursor                                                                                                                                                                                    | <b>ALPQPQNVTSLLGCTH</b>               | f; g                     |
| IP100022488       | HPX Hemopexin precursor                                                                                                                                                                                    | <b>CSDGWSFADATLLDNGTMLFFK</b>         | g                        |
| IP100022488       | HPX Hemopexin precursor                                                                                                                                                                                    | <b>NVAEGETKPPDVTYR</b>                | g                        |
| IP100022488       | HPX Hemopexin precursor                                                                                                                                                                                    | <b>PAVGCSSALR</b>                     | g                        |
| IP100022488       | HPX Hemopexin precursor                                                                                                                                                                                    | <b>SWPAVGCSSALR</b>                   | f; g                     |



| IPI Accession No. | Protein Description                                                                                                                                                   | Peptide Sequence*                 | Primary Source Dataset** |
|-------------------|-----------------------------------------------------------------------------------------------------------------------------------------------------------------------|-----------------------------------|--------------------------|
| IP10002488        | HPX Hemopexin precursor                                                                                                                                               | ALPQPNVTSLLG                      | f; g                     |
| IP10039825        | HRNR Hornerin                                                                                                                                                         | CSGSGWSSRRGPY                     | f; g                     |
| IP10003766        | HSCO protein                                                                                                                                                          | LLYAVNTHCHADHITGSGLLR             | b                        |
| IP100789847       | HSP90AA1 heat shock protein 90kDa alpha (cytosolic), class A member 1 isoform 1                                                                                       | RAPFDLFENR                        | f                        |
| IP100784295       | HSP90AA1 Isoform 1 of Heat shock protein HSP 90-alpha; HSP90AA1 Isoform 2 of Heat shock protein HSP 90-alpha                                                          | DKEVSDDEAEKK                      | h                        |
| IP100784295       | HSP90AA1 Isoform 1 of Heat shock protein HSP 90-alpha; HSP90AA1 Isoform 2 of Heat shock protein HSP 90-alpha                                                          | ESEDKPEIEDVGSDEEEK                | h                        |
| IP100414676       | HSP90AB1 Heat shock protein HSP 90-beta                                                                                                                               | EKEISDDEAEKK                      | h                        |
| IP100414676       | HSP90AB1 Heat shock protein HSP 90-beta                                                                                                                               | IEDVGSDEEDDSGK                    | b                        |
| IP100414676       | HSP90AB1 Heat shock protein HSP 90-beta                                                                                                                               | IEDVGSDEEDDSGKDK                  | h                        |
| IP100414676       | HSP90AB1 Heat shock protein HSP 90-beta                                                                                                                               | IEDVGSDEEDDSGKDKK                 | h                        |
| IP10055915        | HSP90AB6P Heat shock protein 90Bf                                                                                                                                     | IENVGSNEEDDSGKDKK                 | h                        |
| IP100027230       | HSP90B1 Endoplasmic precursor                                                                                                                                         | HNNDTQHIVESDSNEFSVIADPR           | f; g                     |
| IP100027230       | HSP90B1 Endoplasmic precursor                                                                                                                                         | TDDEVYQREAEIQLDGLNASQIR           | f                        |
| IP100924436       | HSPB1 Uncharacterized protein                                                                                                                                         | QLSSGVSEIR                        | h                        |
| IP100038333       | HSPC032                                                                                                                                                               | LCSGVLGTVVHKG                     | b                        |
| IP10000581        | HSPC263                                                                                                                                                               | TRPDGNCFYR                        | b                        |
| IP100024284       | HSPG2 Basement membrane-specific heparan sulfate proteoglycan core protein precursor                                                                                  | ALVNFTR                           | f                        |
| IP100024284       | HSPG2 Basement membrane-specific heparan sulfate proteoglycan core protein precursor                                                                                  | SLTQGLIVGLDLPVNGTSQGK             | f                        |
| IP100039333       | Hydroxacylglutathione hydrolase                                                                                                                                       | VYCGHEYTNNLK                      | b                        |
| IP10000877        | HYOU1 Hypoxia up-regulated protein 1 precursor                                                                                                                        | AEPPLNASASDQGEK                   | f                        |
| IP10000877        | HYOU1 Hypoxia up-regulated protein 1 precursor                                                                                                                        | VINETWAWK                         | f                        |
| IP100383404       | Hypothetical protein                                                                                                                                                  | AKHCQAGAPADVAC                    | b                        |
| IP100386633       | Hypothetical protein                                                                                                                                                  | CGPRAAPR                          | b                        |
| IP100062543       | Hypothetical protein                                                                                                                                                  | CHILDLIKAQR                       | b                        |
| IP100163187       | Hypothetical protein                                                                                                                                                  | GEHGFICR                          | b                        |
| IP100163187       | Hypothetical protein                                                                                                                                                  | KCAFR                             | b                        |
| IP100383404       | Hypothetical protein                                                                                                                                                  | LYSPGCYVFSRR                      | b                        |
| IP100246170       | Hypothetical protein                                                                                                                                                  | MGAVGESLSVQCR                     | b                        |
| IP100395655       | Hypothetical protein                                                                                                                                                  | SYSCQVTHEGSTVEK                   | b; c                     |
| IP100386633       | Hypothetical protein                                                                                                                                                  | YFLRALAPETPRACGVTR                | b                        |
| IP100334775       | Hypothetical protein                                                                                                                                                  | VFIMDSCELIPELVNFR                 | b                        |
| IP100163187       | Hypothetical protein                                                                                                                                                  | VGKDFEALFQSCAQVVLQANER            | b                        |
| IP100030274       | Hypothetical protein DKFZp434K1421                                                                                                                                    | AAALEACLDTVK                      | a                        |
| IP100384959       | Hypothetical protein DKFZp686G01173                                                                                                                                   | ENLVCVK                           | b                        |
| IP100385612       | Hypothetical protein DKFZp761D171 (Fragment)                                                                                                                          | AAAPGAGEDEDDGASR                  | d; e                     |
| IP100385334       | Hypothetical protein DKFZp79N0926,Splice isoform Gamma-A of P02679 Fibrinogen gamma chain precursor,Splice isoform Gamma-B of P02679 Fibrinogen gamma chain precursor | CHAGHLNYYVQGGTYSK                 | b                        |
| IP100020075       | Hypothetical protein FLJ11342                                                                                                                                         | EAEHCLLHSPVNCPIR                  | b                        |
| IP100020075       | Hypothetical protein FLJ11342                                                                                                                                         | SLGHACIR                          | b                        |
| IP100024074       | Hypothetical protein FLJ13705,Hypothetical protein                                                                                                                    | CSCGDSSRRR                        | b                        |
| IP100011996       | Hypothetical protein FLJ13968(HOYS7)                                                                                                                                  | CPDVTIHPRR                        | b                        |
| IP100011996       | Hypothetical protein FLJ13968(HOYS7)                                                                                                                                  | NYNECIR                           | b                        |
| IP100328575       | Hypothetical protein FLJ14427,hypothetical protein FLJ14427,Protein-tyrosine phosphatase, non-receptor type 5                                                         | EVEEAAQQEGPHCAPHIVCSAGIR          | b                        |
| IP100328575       | Hypothetical protein FLJ14427,hypothetical protein FLJ14427,Protein-tyrosine phosphatase, non-receptor type 5                                                         | IEDDFLDLPVETPVDFCVMDIKPEADPTSLTVK | b                        |
| IP100015833       | Hypothetical protein FLJ20420                                                                                                                                         | ICSEER                            | b                        |
| IP100015833       | Hypothetical protein FLJ20420                                                                                                                                         | ILOCYR                            | b                        |
| IP100386230       | Hypothetical protein FLJ21558,N-acylsphingosine amidohydrolase (acid ceramidase) 1 isoform b,Acid ceramidase precursor,Hypothetical protein                           | CTSIVAEDKK                        | b                        |
| IP100386221       | Hypothetical protein FLJ21215,Hypothetical protein                                                                                                                    | KIVEACK                           | b                        |
| IP100289396       | Hypothetical protein FLJ30394                                                                                                                                         | LDHALNSPTSPCEVIK                  | b                        |
| IP100043744       | Hypothetical protein FLJ30596                                                                                                                                         | SEGLCLPVR                         | b                        |
| IP100176221       | Hypothetical protein FLJ34988                                                                                                                                         | DYSLQNVNDVDDGPTCSVQTQTPR          | b                        |
| IP100176144       | Hypothetical protein FLJ38303                                                                                                                                         | CGQAVSSALRVSLGPVK                 | b                        |
| IP100396531       | Hypothetical protein FLJ38951                                                                                                                                         | CVSGEGAPR                         | b                        |
| IP100014235       | Hypothetical protein KIAA0066                                                                                                                                         | HLLPCVHAAVLK                      | b                        |
| IP100028980       | Hypothetical protein KIAA0133                                                                                                                                         | CVTTS                             | b                        |
| IP100028980       | Hypothetical protein KIAA0133                                                                                                                                         | LLSLSLLHCIMFNMR                   | b                        |
| IP100022021       | Hypothetical protein KIAA0273                                                                                                                                         | DRLLDLDIACNK                      | b                        |
| IP100022021       | Hypothetical protein KIAA0273                                                                                                                                         | TCNISVGR                          | b                        |
| IP100006014       | Hypothetical protein KIAA0562                                                                                                                                         | AATEEAEK                          | a                        |
| IP100307155       | Hypothetical protein KIAA0619                                                                                                                                         | MDEITGMVHCDTAVGTPDVISPEVLK        | b                        |
| IP100307155       | Hypothetical protein KIAA0619                                                                                                                                         | NLICAFITDR                        | b                        |
| IP100024382       | Hypothetical protein KIAA0627                                                                                                                                         | IPRPSVQGSKR                       | b                        |
| IP100006632       | Hypothetical protein KIAA0736                                                                                                                                         | TTAFGLNALCK                       | b                        |
| IP100183445       | Hypothetical protein KIAA0821                                                                                                                                         | RPPAPNLHVSPFLCEPR                 | b                        |
| IP100016619       | Hypothetical protein KIAA0898                                                                                                                                         | CENHIEK                           | b                        |
| IP100016619       | Hypothetical protein KIAA0898                                                                                                                                         | KSACSDMLLEGGPTTASVREAK            | b                        |
| IP100010496       | Hypothetical protein KIAA1045                                                                                                                                         | KLDDDKPPEICLEPR                   | b                        |
| IP100010496       | Hypothetical protein KIAA1045                                                                                                                                         | VFHDGCLR                          | b                        |
| IP100001790       | Hypothetical protein KIAA1450                                                                                                                                         | DCDRRGRQVL                        | b                        |
| IP100030578       | Hypothetical protein KIAA1576                                                                                                                                         | ACGLNFIDLMVR                      | b                        |
| IP100028318       | Hypothetical protein KIAA1733                                                                                                                                         | YPCSTYSHSSGLHSGDGVTK              | b                        |
| IP100242250       | Hypothetical protein KIAA1808,actin binding LIM protein 2                                                                                                             | HYHPSALCVR                        | b                        |
| IP100306429       | Hypothetical protein KIAA1878                                                                                                                                         | VQRPEPSCR                         | b                        |
| IP100306429       | Hypothetical protein KIAA1878                                                                                                                                         | VQRPEPSCRPR                       | b                        |
| IP100158296       | Hypothetical protein LOC23078 isoform a                                                                                                                               | EIRAGTAFYIDQCA                    | b                        |
| IP100061448       | Hypothetical protein LOC90693                                                                                                                                         | RTNVSISR                          | a                        |
| IP100220617       | Hypothetical protein,6-phosphofructokinase, liver type                                                                                                                | AAAYNLVQHGTNLVIGGGDGLTGANIFR      | b                        |
| IP100386271       | Hypothetical protein,Calcium-binding mitochondrial carrier protein Aralar1                                                                                            | ACFLR                             | b                        |
| IP100386271       | Hypothetical protein,Calcium-binding mitochondrial carrier protein Aralar1                                                                                            | DIPFSAIYFPVYAHCK                  | b                        |
| IP100386271       | Hypothetical protein,Calcium-binding mitochondrial carrier protein Aralar1                                                                                            | NSDFCFK                           | b                        |
| IP100386271       | Hypothetical protein,Calcium-binding mitochondrial carrier protein Aralar1                                                                                            | NSDFCFK                           | b                        |
| IP100386271       | Hypothetical protein,Calcium-binding mitochondrial carrier protein Aralar1                                                                                            | SAIYFPVYAHCK                      | b                        |
| IP100385665       | Hypothetical protein,C-terminal binding protein 1,CIBP1 protein                                                                                                       | DVATVAFCDAGSTQEIHEK               | b                        |
| IP100395912       | Hypothetical protein,FLJ00385 protein,Human full-length cDNA clone CSODI019YF20 of placenta of Homo sapiens,Ig gamma-3 chain C region                                 | TPEVTCVVVDVSHEDPEVQ               | b                        |
| IP100395912       | Hypothetical protein,FLJ00385 protein,Human full-length cDNA clone CSODI019YF20 of placenta of Homo sapiens,Ig gamma-3 chain C region                                 | TPEVTCVVVDVSHEDPEVQFK             | b                        |
| IP100388315       | Hypothetical protein,Glial fibrillary acidic protein, astrocyte                                                                                                       | RQLSLTCDLESIR                     | b                        |
| IP100395912       | Hypothetical protein,Human full-length cDNA clone CSODI019YF20 of placenta of Homo sapiens,Ig gamma-3 chain C region,FLJ00385 protein                                 | CKVSNKALPALEK                     | b                        |
| IP100074333       | Hypothetical protein,Hypothetical protein DKFZp686L19147                                                                                                              | TDPHLCDLFTLHDEEVK                 | b                        |
| IP100383853       | Hypothetical protein,Hypothetical protein FLJ10849                                                                                                                    | IHACLVIAPITG                      | b                        |
| IP100383853       | Hypothetical protein,Hypothetical protein FLJ10849                                                                                                                    | IHACLVIAPITGHSK                   | b                        |
| IP100329132       | Hypothetical protein,Hypothetical protein FLJ13158,Similar to hypothetical protein FLJ13158,Hypothetical protein                                                      | LCPIIPIATR                        | b                        |
| IP100171564       | Hypothetical protein,Hypothetical protein FLJ23843                                                                                                                    | LHCTPGDQGR                        | b                        |
| IP100165284       | Hypothetical protein,Similar to neurofilament, light polypeptide 68kDa                                                                                                | TLEIEACR                          | b; c; e                  |
| IP100152335       | Hypothetical protein,Sodium- and chloride-dependent creatine transporter 1,IP100332229.1,ENSEMBL:ENSP00000332810,Sodium- and chloride-                                | FPVLYCK                           | b                        |
| IP100384187       | Hypothetical protein,Splice isoform A of Q9UHQ3 Neuronal-specific septin 3                                                                                            | TPWGIEVENLNHCEFALLR               | b                        |
| IP100642425       | ICAM1 Cell surface glycoprotein; ICAM1 Intercellular adhesion molecule 1 precursor                                                                                    | ANLTVLLR                          | f                        |
| IP100290456       | ICAM5 Intercellular adhesion molecule 5 precursor                                                                                                                     | AELDRPHGLGLFENSSAPR               | f; g                     |
| IP100743302       | ICAM5 intercellular adhesion molecule 5 precursor                                                                                                                     | FEEPSCSNWTWVEGSGR                 | f                        |

| IPI Accession No. | Protein Description                                                                                                                          | Peptide Sequence*              | Primary Source Dataset** |
|-------------------|----------------------------------------------------------------------------------------------------------------------------------------------|--------------------------------|--------------------------|
| IP100290456       | ICAM5 Intercellular adhesion molecule 5 precursor                                                                                            | GGSLWLNCSNCRPER                | f                        |
| IP100743302       | ICAM5 intercellular adhesion molecule 5 precursor; ICAM5 Intercellular adhesion molecule 5 precursor                                         | GLGLFENSSAPR                   | f                        |
| IP100743302       | ICAM5 intercellular adhesion molecule 5 precursor; ICAM5 Intercellular adhesion molecule 5 precursor                                         | PGGNFTLTCR                     | f; g                     |
| IP100743302       | ICAM5 intercellular adhesion molecule 5 precursor; ICAM5 Intercellular adhesion molecule 5 precursor                                         | QLVCNVTLLGGENR                 | f; g                     |
| IP100743302       | ICAM5 intercellular adhesion molecule 5 precursor; ICAM5 Intercellular adhesion molecule 5 precursor                                         | VELMPLPWPQVGENFTLSRCR          | f                        |
| IP100743302       | ICAM5 intercellular adhesion molecule 5 precursor; ICAM5 Intercellular adhesion molecule 5 precursor                                         | VLAPGIYVCNATNR                 | f                        |
| IP100790218       | ICOSLG Uncharacterized protein ICOSLG                                                                                                        | LFNVTPODEQK                    | g                        |
| IP100790218       | ICOSLG Uncharacterized protein ICOSLG                                                                                                        | EVRAMVGSDELSCAPEGSR            | g                        |
| IP100790218       | ICOSLG Uncharacterized protein ICOSLG                                                                                                        | TVVTVHPQSSLENVDSR              | g                        |
| IP100026104       | IDS Isoform Long of Iduronate 2-sulfatase precursor                                                                                          | EDVQALNISVPYGPVPDFQR           | g                        |
| IP100026104       | IDS Isoform Long of Iduronate 2-sulfatase precursor                                                                                          | VHAGNSTIPQYFK                  | g                        |
| IP100004618       | Ig gamma-4 chain C region                                                                                                                    | YGPPCPCAPEFLGGPSVFLFPPKPK      | b                        |
| IP100382937       | Ig mu chain C region membrane-bound segment,Hypothetical protein,Hypothetical protein,Ig mu heavy chain disease protein,Hypothetical protein | FTCTVHTDLSPSLK                 | b                        |
| IP100785067       | IGH@ IGH@ protein                                                                                                                            | TPLTANIK                       | f; g                     |
| IP100423462       | IGHA1:IGHV3OR16-13 Putative uncharacterized protein DKFZp686K18196 (Fragment)                                                                | LAKGPTHVNSVVMVAEVDGTCY         | f; g                     |
| IP100423462       | IGHA1:IGHV3OR16-13 Putative uncharacterized protein DKFZp686K18196 (Fragment)                                                                | LSLHRPALEDLLGSEANLTCTLTGLR     | f; g                     |
| IP100423462       | IGHA1:IGHV3OR16-13 Putative uncharacterized protein DKFZp686K18196 (Fragment)                                                                | PALEDLLGSEANLTCTLTGLR          | f; g                     |
| IP100783993       | IGHA2 IGH2 protein                                                                                                                           | LAKGPTHVNSVVMVAEVDGTC          | g                        |
| IP100783993       | IGHA2 IGH2 protein                                                                                                                           | HYTNPSQDVTVP                   | g                        |
| IP100783993       | IGHA2 IGH2 protein                                                                                                                           | LAKGPTHVNSV                    | g                        |
| IP100815926       | IGHG1 IGHG1 protein; IGHM IGHM protein                                                                                                       | EEQYNSTYR                      | f; g                     |
| IP100815926       | IGHG1 IGHG1 protein; IGHM IGHM protein                                                                                                       | TKFREEQYNSTYR                  | f; g                     |
| IP100784807       | IGHG2 Putative uncharacterized protein                                                                                                       | EEQFNSTFR                      | g                        |
| IP100784807       | IGHG2 Putative uncharacterized protein                                                                                                       | REEQFNSTFR                     | g                        |
| IP100784807       | IGHG2 Putative uncharacterized protein                                                                                                       | VVSVLTVHQDVLNGKEYK             | g                        |
| IP100829767       | IGHG2 Uncharacterized protein IGHG2 (Fragment)                                                                                               | EEQFNSTFR                      | f; g                     |
| IP100472345       | IGHG3 IGHG3 protein                                                                                                                          | PMLDSDGFSFLYSK                 | g                        |
| IP100472345       | IGHG3 IGHG3 protein                                                                                                                          | STSGGTAALGCLVK                 | g                        |
| IP100472345       | IGHG3 IGHG3 protein                                                                                                                          | TKPREEQFNSTFR                  | g                        |
| IP100472345       | IGHG3 IGHG3 protein                                                                                                                          | VSNKALPAPIEK                   | g                        |
| IP100829814       | IGHG4 Ig gamma-4 chain C region; - Putative uncharacterized protein DKFZp686M24218; IGHG4 IGHG4 protein                                      | EEQFNSTYR                      | g                        |
| IP100829814       | IGHG4 Ig gamma-4 chain C region; - Putative uncharacterized protein DKFZp686M24218; IGHG4 IGHG4 protein                                      | PAPEFLGGPSVFLFPPKPK            | g                        |
| IP100829814       | IGHG4 Ig gamma-4 chain C region; - Putative uncharacterized protein DKFZp686M24218; IGHG4 IGHG4 protein                                      | SYMHEALHNHYTQK                 | g                        |
| IP100829814       | IGHG4 Ig gamma-4 chain C region; - Putative uncharacterized protein DKFZp686M24218; IGHG4 IGHG4 protein                                      | TKPREEQFNSTYR                  | g                        |
| IP100550640       | IGHG4 IGHG4 protein                                                                                                                          | STSESTAALGCLVK                 | g                        |
| IP100550640       | IGHG4 IGHG4 protein                                                                                                                          | VVSVLTVHQDVLNGKEYK             | g                        |
| IP100550640       | IGHG4 IGHG4 protein                                                                                                                          | EEQFNSTY                       | g                        |
| IP100828205       | IGHM IGHM protein                                                                                                                            | GLTFQGNASSMCPDQDTAIR           | f; g                     |
| IP100549291       | IGHM IGHM protein                                                                                                                            | YKNSDISSTR                     | f; g                     |
| IP100816314       | IGHM Putative uncharacterized protein DKFZp686I5196                                                                                          | CRVSNKALPAPIEK                 | g                        |
| IP100816314       | IGHM Putative uncharacterized protein DKFZp686I5196                                                                                          | REEQYNSTYR                     | g                        |
| IP100186736       | IGSF8 Isoform 3 of Immunoglobulin superfamily member 8 precursor; IGSF8 Isoform 1 of Immunoglobulin superfamily member 8 precursor           | GETASLNCNISR                   | f                        |
| IP100186736       | IGSF8 Isoform 3 of Immunoglobulin superfamily member 8 precursor; IGSF8 Isoform 1 of Immunoglobulin superfamily member 8 precursor           | IGPGELELLCNVSGALPPAGR          | f; g                     |
| IP100186736       | IGSF8 Isoform 3 of Immunoglobulin superfamily member 8 precursor; IGSF8 Isoform 1 of Immunoglobulin superfamily member 8 precursor           | RIGPGELELLCNVSGALPPAGR         | f                        |
| IP100787853       | IMPAD1 Inositol monophosphatase 3                                                                                                            | QVALQTGNTTIPAGGAGYK            | f                        |
| IP100001639       | Importin beta-1 subunit                                                                                                                      | AAVENLPTFLVELSR                | e                        |
| IP100029533       | Integrin beta-8 precursor                                                                                                                    | GQVCSGR                        | b                        |
| IP100029533       | Integrin beta-8 precursor                                                                                                                    | KCDVTGK                        | b                        |
| IP100023648       | ISLR Immunoglobulin superfamily containing leucine-rich repeat protein precursor                                                             | FQAFANGSLLPDFGK                | i                        |
| IP100030702       | Isocitrate dehydrogenase [NAD] subunit alpha, mitochondrial precursor                                                                        | EVAESCK                        | b                        |
| IP100335068       | isocitrate dehydrogenase 3 (NAD+) gamma isoform b precursor,Isocitrate dehydrogenase [NAD] subunit gamma, mitochondrial precursor            | TSLDLYANVHCK                   | b                        |
| IP100221189       | Isoform 1 of Aquaporin-4                                                                                                                     | AAQQTQ                         | ct; d                    |
| IP100306170       | Isoform 1 of GAS2-like protein 1                                                                                                             | AAFPAPNAPAGEDTTETAPAPGTPAR     | e                        |
| IP100003842       | Isoform 1 of Microtubule-associated protein 2                                                                                                | EEFVETCPSEHK                   | b                        |
| IP100411559       | Isoform 1 of Structural maintenance of chromosomes protein 4                                                                                 | AAEVKNTNAEESLPEI               | a                        |
| IP100084828       | Isoform 1 of Syntaxin-binding protein 1                                                                                                      | AAHVFTSDCPDALFNELVK            | dt; e                    |
| IP100184119       | Isoform 2 of Putative tyrosine-protein phosphatase auxilin                                                                                   | VIDLTPPWEHYCTK                 | b                        |
| IP100218207       | Isoform 2 of Spectrin beta chain, brain 2                                                                                                    | AAELQAWQER                     | d                        |
| IP100181738       | Isoform 3 of Serine/threonine-protein phosphatase 2B catalytic subunit beta isoform                                                          | AAPPPPPPPPPPGADR               | d                        |
| IP100477765       | Isoform 8 of Neurofascin precursor                                                                                                           | AAPVWLDEPK                     | dt; e                    |
| IP100304577       | Isoform A of AP-2 complex subunit alpha-1                                                                                                    | AADLLYAMCDR                    | b; dt; e                 |
| IP100759715       | Isoform Cytoplasmic of Fumarate hydratase, mitochondrial precursor                                                                           | AAAENVQDYGIDPK                 | d                        |
| IP100759715       | Isoform Cytoplasmic of Fumarate hydratase, mitochondrial precursor                                                                           | AADEVAEGK                      | e                        |
| IP100006482       | Isoform Long of Sodium/potassium-transporting ATPase alpha-1 chain precursor                                                                 | AAEILAR                        | e                        |
| IP100221254       | Isoform Short of RNA-binding protein FUS                                                                                                     | AAIDWFDGK                      | d                        |
| IP100845516       | ITFG3 Isoform 1 of Protein ITFG3                                                                                                             | YKPDTLAVAVENGTGDR              | f; g                     |
| IP100743104       | ITGA1 Integrin alpha-1 precursor                                                                                                             | QTQVGIVQYGENVTHEFNLNK          | f; g                     |
| IP100743104       | ITGA1 Integrin alpha-1 precursor                                                                                                             | SVFSSNLNTR                     | f                        |
| IP100743104       | ITGA1 Integrin alpha-1 precursor                                                                                                             | YNHTGQVHYR                     | f                        |
| IP100013744       | ITGA2 Integrin alpha-2 precursor                                                                                                             | YFNVSEDAALLEK                  | f; g                     |
| IP100645887       | ITGAM Integrin, alpha M                                                                                                                      | EFNVTVYR                       | f; g                     |
| IP100645887       | ITGAM Integrin, alpha M                                                                                                                      | ELFNITNGAR                     | f                        |
| IP100217562       | ITGB1 Isoform Beta-1C-2 of Integrin beta-1 precursor; ITGB1 Isoform Beta-1C of Integrin beta-1 precursor                                     | DTCTQECYSFNTRK                 | f; g                     |
| IP100291792       | ITGB2 Integrin beta-2 precursor                                                                                                              | LNFTGPGDFDSIR                  | f                        |
| IP100029533       | ITGB8 Integrin beta-8 precursor                                                                                                              | NYAIKPIGFNETAK                 | f                        |
| IP100218192       | ITIH4 Isoform 2 of Inter-alpha-trypsin inhibitor heavy chain H4 precursor                                                                    | LPTQNTIFQTESSVAEQEAFQSPK       | f; g                     |
| IP100328829       | ITIH5 inter-alpha trypsin inhibitor heavy chain precursor 5 isoform 1                                                                        | LTEDPAGPSQNLTHPLLLQVGEPEAVLTVK | g                        |
| IP100328829       | ITIH5 inter-alpha trypsin inhibitor heavy chain precursor 5 isoform 1                                                                        | TLFPNYFNGSEIHAIGK              | f; g                     |
| IP100152850       | JAM3 junctional adhesion molecule 3 precursor                                                                                                | IWNVTR                         | f; g                     |
| IP100152850       | JAM3 junctional adhesion molecule 3 precursor                                                                                                | NSSFHNSSETGLTVFTAVHK           | f; g                     |
| IP100152850       | Junction adhesion molecule 3                                                                                                                 | CEVVAR                         | b                        |
| IP100152850       | Junction adhesion molecule 3                                                                                                                 | MATLHCQESGHPR                  | b                        |
| IP100164417       | Karyopherin beta2b homolog,Transportin2                                                                                                      | CSAALDVLVYFR                   | b                        |
| IP100295684       | Keratin 10,Keratin, type I cytoskeletal 10                                                                                                   | YCVQLSQIQAQISALEEQLQQR         | b                        |
| IP100290078       | Keratin, type II cytoskeletal 4                                                                                                              | QCQTQLQVSVADAEQR               | b                        |
| IP100329705       | KIAA1363 protein,Hypothetical protein KIAA1363                                                                                               | TYILTCEHDVLR                   | b                        |
| IP100787773       | KIAA1549 hypothetical protein LOC57670                                                                                                       | STQGLFNGSEVELLR                | f                        |
| IP100014515       | KIAA1622 protein                                                                                                                             | AASRTLCTFLR                    | a                        |
| IP100396166       | KIAA1946 Isoform 1 of UPF0560 protein KIAA1946 precursor                                                                                     | QYLSQAVYEVFVNYTK               | f                        |
| IP100021634       | Kinesin light chain 2                                                                                                                        | LEAAHTELEDCASR                 | b                        |
| IP100021634       | Kinesin light chain 2                                                                                                                        | NNLASCYLK                      | b                        |
| IP100032328       | KNG1 Isoform HMW of Kininogen-1 precursor                                                                                                    | ITYSIVQTNCSK                   | g                        |
| IP100032328       | KNG1 Isoform HMW of Kininogen-1 precursor                                                                                                    | YNSQNSNNQFVLYR                 | g                        |
| IP100032328       | KNG1 Isoform HMW of Kininogen-1 precursor                                                                                                    | SIVQTNCSK                      | g                        |
| IP100789376       | KNG1 KNG1 protein; KNG1 Isoform LMW of Kininogen-1 precursor                                                                                 | HGIQVFNNTQHSLSFMLEVNEK         | g                        |
| IP100789376       | KNG1 KNG1 protein; KNG1 Isoform LMW of Kininogen-1 precursor                                                                                 | HGIQVFNNTQHSLSFMLEVNEKR        | g                        |
| IP100789376       | KNG1 KNG1 protein; KNG1 Isoform LMW of Kininogen-1 precursor                                                                                 | LNAAENATVYFK                   | g                        |



| IPI Accession No. | Protein Description                                                                                                                         | Peptide Sequence*                   | Primary Source Dataset** |
|-------------------|---------------------------------------------------------------------------------------------------------------------------------------------|-------------------------------------|--------------------------|
| IP0020327         | KRT1 Keratin, type II cytoskeletal 1                                                                                                        | LALDLEIATYR                         | g                        |
| IP0020327         | KRT1 Keratin, type II cytoskeletal 1                                                                                                        | QSKYEELQITAGR                       | f; g                     |
| IP0020327         | KRT1 Keratin, type II cytoskeletal 1                                                                                                        | SGGFSSGAGINHYQR                     | f; g                     |
| IP0020327         | KRT1 Keratin, type II cytoskeletal 1                                                                                                        | SISISVAR                            | f; g                     |
| IP0020327         | KRT1 Keratin, type II cytoskeletal 1                                                                                                        | SKAEALYSQSYEELQITAGR                | f; g                     |
| IP00021304        | KRT2 Keratin, type II cytoskeletal 2 epidermal                                                                                              | HGGGGGFGGGGFGSR                     | f; g                     |
| IP00021304        | KRT2 Keratin, type II cytoskeletal 2 epidermal                                                                                              | LALDVEIATYR                         | g                        |
| IP00021304        | KRT2 Keratin, type II cytoskeletal 2 epidermal                                                                                              | YEELQVTVGR                          | g                        |
| IP00019359        | KRT9 Keratin, type I cytoskeletal 9                                                                                                         | HGLGRGGSGSGSYGR                     | f; g                     |
| IP00019359        | KRT9 Keratin, type I cytoskeletal 9                                                                                                         | QFSSSYLSR                           | f                        |
| IP00019359        | KRT9 Keratin, type I cytoskeletal 9                                                                                                         | SGGGGGGLGSGGSIR                     | f                        |
| IP00871467        | LICAM cDNA FLJ76744, highly similar to Homo sapiens L1 cell adhesion molecule (LICAM), transcript variant 1, mRNA; LICAM 140 kDa pr         | GGASLSPQVSVY                        | f                        |
| IP00871467        | LICAM cDNA FLJ76744, highly similar to Homo sapiens L1 cell adhesion molecule (LICAM), transcript variant 1, mRNA; LICAM 140 kDa pr         | GPEPQVITGY                          | f                        |
| IP00871467        | LICAM cDNA FLJ76744, highly similar to Homo sapiens L1 cell adhesion molecule (LICAM), transcript variant 1, mRNA; LICAM 140 kDa pr         | SSYHLEVQAFNGR                       | f                        |
| IP00871467        | LICAM cDNA FLJ76744, highly similar to Homo sapiens L1 cell adhesion molecule (LICAM), transcript variant 1, mRNA; LICAM 140 kDa pr         | VASTLEDVVESSR                       | f                        |
| IP00871467        | LICAM cDNA FLJ76744, highly similar to Homo sapiens L1 cell adhesion molecule (LICAM), transcript variant 1, mRNA; LICAM 140 kDa pr         | GEGNETTNMVTWKPLR                    | f                        |
| IP00871467        | LICAM cDNA FLJ76744, highly similar to Homo sapiens L1 cell adhesion molecule (LICAM), transcript variant 1, mRNA; LICAM 140 kDa pr         | GPEPQVITGYSGYEDYQPAIPELEGIEHNSAVLYK | f                        |
| IP00871467        | LICAM cDNA FLJ76744, highly similar to Homo sapiens L1 cell adhesion molecule (LICAM), transcript variant 1, mRNA; LICAM 140 kDa pr         | GVNVTYWR                            | f; g                     |
| IP00871467        | LICAM cDNA FLJ76744, highly similar to Homo sapiens L1 cell adhesion molecule (LICAM), transcript variant 1, mRNA; LICAM 140 kDa pr         | VPGNQISTTLK                         | f                        |
| IP00871467        | LICAM cDNA FLJ76744, highly similar to Homo sapiens L1 cell adhesion molecule (LICAM), transcript variant 1, mRNA; LICAM Isoform 1 c        | DHVVYPANTSVLISGLRPY                 | f; g                     |
| IP00871467        | LICAM cDNA FLJ76744, highly similar to Homo sapiens L1 cell adhesion molecule (LICAM), transcript variant 1, mRNA; LICAM Isoform 1 c        | EELGVTYQSPHSGSFTITGNSNFAQR          | f                        |
| IP00871467        | LICAM cDNA FLJ76744, highly similar to Homo sapiens L1 cell adhesion molecule (LICAM), transcript variant 1, mRNA; LICAM Isoform 1 c        | FFPYANGTLGIR                        | a; f; g                  |
| IP00871467        | LICAM cDNA FLJ76744, highly similar to Homo sapiens L1 cell adhesion molecule (LICAM), transcript variant 1, mRNA; LICAM Isoform 1 c        | GPWQELSDPFLVNSNTSTVFPYEIK           | f                        |
| IP00871467        | LICAM cDNA FLJ76744, highly similar to Homo sapiens L1 cell adhesion molecule (LICAM), transcript variant 1, mRNA; LICAM Isoform 1 c        | GSGPASEFTFTPEGVPGHPEALHLEQCNSLTLRR  | f                        |
| IP00871467        | LICAM cDNA FLJ76744, highly similar to Homo sapiens L1 cell adhesion molecule (LICAM), transcript variant 1, mRNA; LICAM Isoform 1 c        | HHKHDDVYPANTSVLISGLRPY              | f                        |
| IP00871467        | LICAM cDNA FLJ76744, highly similar to Homo sapiens L1 cell adhesion molecule (LICAM), transcript variant 1, mRNA; LICAM Isoform 1 c        | HLEVQAFNGR                          | f                        |
| IP00871467        | LICAM cDNA FLJ76744, highly similar to Homo sapiens L1 cell adhesion molecule (LICAM), transcript variant 1, mRNA; LICAM Isoform 1 c        | LVHISLDYSDQGNYS                     | f; g                     |
| IP00646281        | LICAM L1 cell adhesion molecule                                                                                                             | THNLTDLSPHLR                        | f                        |
| IP00641150        | LAMA1 similar to laminin, alpha 1 precursor                                                                                                 | DVAGLSQELLNNTSASLSR                 | f; g                     |
| IP00844276        | LAMA2 laminin alpha 2 subunit isoform a precursor                                                                                           | VSQAEHAAQLNDSSAVLDGLDEAK            | f; g                     |
| IP00735310        | LAMA4 Isoform 2 of Laminin subunit alpha-4 precursor; LAMA4 Isoform 1 of Laminin subunit alpha-4 precursor                                  | NLTVVPLLDQLR                        | f; g                     |
| IP00783665        | LAMA5 Laminin subunit alpha-5 precursor                                                                                                     | AQQLANSTALEEAMLEQQQR                | f                        |
| IP00783665        | LAMA5 Laminin subunit alpha-5 precursor                                                                                                     | DNATLQATLHAAR                       | f; g                     |
| IP00783665        | LAMA5 Laminin subunit alpha-5 precursor                                                                                                     | GINASSMAWAR                         | f                        |
| IP00743203        | LAMB2 Similar to S-laminin                                                                                                                  | LALNLTLR                            | f; g                     |
| IP00298281        | LAMC1 Laminin subunit gamma-1 precursor                                                                                                     | KIPAINQITTEANEK                     | f                        |
| IP00298281        | LAMC1 Laminin subunit gamma-1 precursor                                                                                                     | LLNLTSLIK                           | f; g                     |
| IP00298281        | LAMC1 Laminin subunit gamma-1 precursor                                                                                                     | TANDTSTFEAYNLLLR                    | f                        |
| IP00298281        | LAMC1 Laminin subunit gamma-1 precursor                                                                                                     | VYNTLSSQISR                         | f                        |
| IP00872429        | LAMC3 laminin, gamma 3 precursor; LAMC3 Laminin, gamma 3                                                                                    | LLANLTSLR                           | f; g                     |
| IP00377045        | Laminin alpha 3 splice variant b1                                                                                                           | AASASESALQVIKEDLP                   | a                        |
| IP00013976        | Laminin beta-1 chain precursor                                                                                                              | CDPGYIGSR                           | b                        |
| IP00013976        | Laminin beta-1 chain precursor                                                                                                              | GHNCER                              | b                        |
| IP00004503        | LAMP1 lysosomal-associated membrane protein 1                                                                                               | NMTFDLPDATVVLNR                     | f; g                     |
| IP00004503        | LAMP1 lysosomal-associated membrane protein 1                                                                                               | SSCGKENTS DPSLVIAFGR                | f                        |
| IP00884105        | LAMP1 Lysosome-associated membrane glycoprotein 1 precursor; LAMP1 lysosomal-associated membrane protein 1                                  | GHTLTLNFTLR                         | f; g                     |
| IP00739827        | LAMP2 Isoform LAMP-2B of Lysosome-associated membrane glycoprotein 2 precursor; LAMP2 lysosomal-associated membrane protein 2 isofo         | AASTYSIDSVSYFNTGDNTPFPAEDK          | f; g                     |
| IP00739827        | LAMP2 Isoform LAMP-2B of Lysosome-associated membrane glycoprotein 2 precursor; LAMP2 lysosomal-associated membrane protein 2 isofo         | HVLQFQPGFSWANFTK                    | f; g                     |
| IP00739827        | LAMP2 Isoform LAMP-2B of Lysosome-associated membrane glycoprotein 2 precursor; LAMP2 lysosomal-associated membrane protein 2 isofo         | LNNSSTIK                            | f; g                     |
| IP00739827        | LAMP2 Isoform LAMP-2B of Lysosome-associated membrane glycoprotein 2 precursor; LAMP2 lysosomal-associated membrane protein 2 isofo         | VQPFNVTQGK                          | f; g                     |
| IP00739827        | LAMP2 Isoform LAMP-2B of Lysosome-associated membrane glycoprotein 2 precursor; LAMP2 lysosomal-associated membrane protein 2 isofo         | WQMNFTVTR                           | f; g                     |
| IP00216172        | LAMP2 lysosomal-associated membrane protein 2 isoform C precursor                                                                           | TVTISDHGTVTY                        | g                        |
| IP00216172        | LAMP2 lysosomal-associated membrane protein 2 isoform C precursor                                                                           | VASVINPNTVTHSTGSCR                  | g                        |
| IP00042378        | LASS2 cDNA FLJ75329, highly similar to Homo sapiens LAG1 longevity assurance homolog 2 (S. cerevisiae), transcript variant 2, mRNA; LASS    | LWLPVNLTWADLEDRDGR                  | f; g                     |
| IP00743064        | LCN2 Uncharacterized protein LCN2; LCN2 Lipocalin 2; LCN2 Neutrophil gelatinase-associated lipocalin precursor                              | SYNVTSLFR                           | f; g                     |
| IP00184743        | lethal giant larvae homolog 1.LLGL protein,HuGI protein                                                                                     | CLYFADTFLR                          | b                        |
| IP00184743        | lethal giant larvae homolog 1.LLGL protein,HuGI protein                                                                                     | KEDISGIASCVTR                       | b                        |
| IP00184743        | lethal giant larvae homolog 1.LLGL protein,HuGI protein                                                                                     | LTAHEGCR                            | b                        |
| IP00023673        | LGALS3BP Galectin-3-binding protein precursor                                                                                               | AAPSAIDTNSKK                        | f; g                     |
| IP00023673        | LGALS3BP Galectin-3-binding protein precursor                                                                                               | ALGFENATQALGR                       | f; g                     |
| IP00023673        | LGALS3BP Galectin-3-binding protein precursor                                                                                               | GLNLTEDTYKFR                        | f; g                     |
| IP00023673        | LGALS3BP Galectin-3-binding protein precursor                                                                                               | ELPVLGLTK                           | f; g                     |
| IP00013303        | Limbic system-associated membrane protein precursor                                                                                         | AAEENVSADVK                         | d; e                     |
| IP00795326        | LINGO1 Isoform 2 of Leucine-rich repeat and immunoglobulin-like domain-containing nogo receptor-interacting protein 1 precursor; LINGO1 iso | LPLGVFTGLSNLTK                      | f                        |
| IP00784950        | LOC100126583 Putative uncharacterized protein DKFZp686L19235                                                                                | LAKGPTHVIVSVVMAEVDGT                | g                        |
| IP00748852        | LOC100130850 Uncharacterized protein ENSP00000368524; LOC339240 cDNA FLJ46089 fs, clone TEST12011020                                        | VGTYAVCWCSWNTGR                     | f; g                     |
| IP00887154        | LOC100134219 Complement component 4B; C4A Complement component 4B; C4B C4B1                                                                 | SDGLENSNSTQFEVK                     | g                        |
| IP00887154        | LOC100134219 Complement component 4B; C4B C4B1                                                                                              | FSDGLENSNSTQFEVK                    | f; g                     |
| IP00400926        | LOC399815 LOC399815 protein (Fragment)                                                                                                      | STQASGENSTK                         | g                        |
| IP00455667        | LOC402665 hypothetical protein LOC402665                                                                                                    | SMLLFANYSAR                         | f; g                     |
| IP00554722        | LOC442497.SLC3A2 solute carrier family 3 (activators of dibasic and neutral amino acid transport), member 2 isoform c                       | DASSFLAEWQNTIK                      | f; g                     |
| IP00554722        | LOC442497.SLC3A2 solute carrier family 3 (activators of dibasic and neutral amino acid transport), member 2 isoform c                       | LLIAGTSSDQLHLSLLESNK                | f; g                     |
| IP00554722        | LOC442497.SLC3A2 solute carrier family 3 (activators of dibasic and neutral amino acid transport), member 2 isoform c                       | SLVTOQLNATGNR                       | f                        |
| IP00887333        | LOC729616 similar to hCG2044922                                                                                                             | LSSHSRTGVR                          | f                        |
| IP00410210        | LPHN1 Isoform 2 of Latrophilin-1 precursor                                                                                                  | GPDLNCTSPWVNVQAQK                   | f                        |
| IP00022417        | LRG1 Leucine-rich alpha-2 glycoprotein precursor                                                                                            | KLPPGLLANFTLLR                      | f; g                     |
| IP00020557        | LRP1 Prolow-density lipoprotein receptor-related protein 1 precursor                                                                        | ATALAIMDK                           | a                        |
| IP00032063        | LRPIB Similar to Candidate tumor suppressor protein                                                                                         | AFINGTLETVISR                       | f                        |
| IP00167619        | LRTM2 Leucine-rich repeat and transmembrane domain-containing protein 2 precursor                                                           | SIFGDLTNTELQLR                      | f; g                     |
| IP00796908        | LSAMP 22 kDa protein                                                                                                                        | LGVTNASLVLFK                        | f; g                     |
| IP00013303        | LSAMP Limbic system-associated membrane protein precursor                                                                                   | GTDNITVR                            | f; g                     |
| IP00013303        | LSAMP Limbic system-associated membrane protein precursor                                                                                   | GVTNASLVLFR                         | f; g                     |
| IP00013303        | LSAMP Limbic system-associated membrane protein precursor                                                                                   | LGVTNASLVLFR                        | f; g                     |
| IP00013303        | LSAMP Limbic system-associated membrane protein precursor                                                                                   | LGVTNASLVLFRP                       | f; g                     |
| IP00013303        | LSAMP Limbic system-associated membrane protein precursor                                                                                   | LGVTNASLVLFRPG                      | f                        |
| IP00013303        | LSAMP Limbic system-associated membrane protein precursor                                                                                   | LGVTNASLVLFRPGSVR                   | f; g                     |
| IP00013303        | LSAMP Limbic system-associated membrane protein precursor                                                                                   | VAVLNR                              | f                        |
| IP00794403        | LUM 23 kDa protein; LUM Lumican precursor                                                                                                   | KLHINHNLNLTESVGLPK                  | f                        |
| IP00794403        | LUM 23 kDa protein; LUM Lumican precursor                                                                                                   | LGSEFGLVNLTFHLOHNR                  | f; g                     |
| IP00794403        | LUM 23 kDa protein; LUM Lumican precursor                                                                                                   | LHINHNLNLTESVGLPK                   | g                        |
| IP00009032        | Lupus La protein                                                                                                                            | AAQPGSGK                            | d                        |
| IP00289058        | Ly-6 neurotoxin-like protein 1 isoform c                                                                                                    | CFEYVDGYSK                          | b                        |
| IP00289058        | Ly-6 neurotoxin-like protein 1 isoform c                                                                                                    | LDCHYCAVNGDNCENPMIR                 | b                        |
| IP00385212        | Lysophospholipase LPL-Acyl-protein thioesterase                                                                                             | YICPHAPR                            | b                        |
| IP00025049        | M6PR Cation-dependent mannose-6-phosphate receptor precursor                                                                                | EAGNHTSGAGLVQINK                    | f                        |
| IP00375253        | MAG Myelin associated glycoprotein isoform b precursor; MAG Myelin-associated glycoprotein precursor                                        | ATAFNLSVEFAPVLLLESH                 | f; g                     |
| IP00375253        | MAG Myelin associated glycoprotein isoform b precursor; MAG Myelin-associated glycoprotein precursor                                        | ATAFNLSVEFAPVLLLESHCAAR             | f; g                     |

| IPI Accession No. | Protein Description                                                                                                                                 | Peptide Sequence*                | Primary Source Dataset** |
|-------------------|-----------------------------------------------------------------------------------------------------------------------------------------------------|----------------------------------|--------------------------|
| IP00375253        | MAG Myelin associated glycoprotein isoform b precursor; MAG Myelin-associated glycoprotein precursor                                                | LGCCASFPNTLQFEGYASMDVK           | f; g                     |
| IP00375253        | MAG Myelin associated glycoprotein isoform b precursor; MAG Myelin-associated glycoprotein precursor                                                | NCTLLSNVSPELGGK                  | f; g                     |
| IP00375253        | MAG Myelin associated glycoprotein isoform b precursor; MAG Myelin-associated glycoprotein precursor                                                | PDPILTFK                         | f; g                     |
| IP00375253        | MAG Myelin associated glycoprotein isoform b precursor; MAG Myelin-associated glycoprotein precursor                                                | SNPSPSAFELPSRNVTVNESER           | f; g                     |
| IP00026237        | MAG Myelin-associated glycoprotein precursor                                                                                                        | CTLLSNVSPELGGK                   | f; g                     |
| IP00291006        | Malate dehydrogenase, mitochondrial precursor                                                                                                       | GCDVVVIVAGVPR                    | b; c; d; g               |
| IP00291006        | Malate dehydrogenase, mitochondrial precursor                                                                                                       | ISQCTPK                          | b                        |
| IP00887765        | MAP1A Isoform 1 of Microtubule-associated protein 1A; MAP1A Uncharacterized protein                                                                 | ELAPAWEDTSPQDNR                  | c; d; e; h               |
| IP00887765        | MAP1A Isoform 1 of Microtubule-associated protein 1A; MAP1A Uncharacterized protein                                                                 | GQDVVQEWQETSPTTR                 | h                        |
| IP00887765        | MAP1A Isoform 1 of Microtubule-associated protein 1A; MAP1A Uncharacterized protein                                                                 | GQDVVQEWQETSPTREEPAGEQK          | h                        |
| IP00887765        | MAP1A Isoform 1 of Microtubule-associated protein 1A; MAP1A Uncharacterized protein                                                                 | TEATQGLDVLVPSAGTISPTSSLEEDK      | h                        |
| IP00020356        | MAP1A Uncharacterized protein                                                                                                                       | AEELEEMEEVHPSEDEEDATK            | h                        |
| IP00020356        | MAP1A Uncharacterized protein                                                                                                                       | CLSPDDSTVK                       | h                        |
| IP00020356        | MAP1A Uncharacterized protein                                                                                                                       | ELSSPSFK                         | h                        |
| IP00020356        | MAP1A Uncharacterized protein                                                                                                                       | GLDSGAIETEEKDWTWEEK              | h                        |
| IP00008868        | MAP1B Microtubule-associated protein 1B                                                                                                             | ASVSPMDEFPVDSSEPIEK              | h                        |
| IP00008868        | MAP1B Microtubule-associated protein 1B                                                                                                             | DVMSDEITNNEETSPSQEFVNITK         | h                        |
| IP00008868        | MAP1B Microtubule-associated protein 1B                                                                                                             | EKRESVANGDDR                     | h                        |
| IP00008868        | MAP1B Microtubule-associated protein 1B                                                                                                             | ESVASGDRAEEDMDDEAIK              | h                        |
| IP00008868        | MAP1B Microtubule-associated protein 1B                                                                                                             | GEAEQSEEEADEEDK                  | h                        |
| IP00008868        | MAP1B Microtubule-associated protein 1B                                                                                                             | GEAEQSEEEADEEDKAEADAR            | h                        |
| IP00008868        | MAP1B Microtubule-associated protein 1B                                                                                                             | GPAESPDEGITTEGECEQTPPELEPVK      | e; h                     |
| IP00008868        | MAP1B Microtubule-associated protein 1B                                                                                                             | HSPTDEESAK                       | c; h                     |
| IP00008868        | MAP1B Microtubule-associated protein 1B                                                                                                             | KLGDVSPVTDVVSQFSGFK              | h                        |
| IP00008868        | MAP1B Microtubule-associated protein 1B                                                                                                             | QGSPPQVVSPEMSTSLVQDK             | h                        |
| IP00008868        | MAP1B Microtubule-associated protein 1B                                                                                                             | SISPPDFPK                        | h                        |
| IP00008868        | MAP1B Microtubule-associated protein 1B                                                                                                             | SLASSPDLTK                       | h                        |
| IP00008868        | MAP1B Microtubule-associated protein 1B                                                                                                             | SPSLSPSPSPPLEK                   | d; h                     |
| IP00008868        | MAP1B Microtubule-associated protein 1B                                                                                                             | TATCHSSSSPIDAASAEVYGR            | h                        |
| IP00008868        | MAP1B Microtubule-associated protein 1B                                                                                                             | TTKSPDSGYSYETIGK                 | h                        |
| IP00008868        | MAP1B Microtubule-associated protein 1B                                                                                                             | TTSPEVSGSYEK                     | d; e; h                  |
| IP00008868        | MAP1B Microtubule-associated protein 1B                                                                                                             | VQSLGKELSPK                      | h                        |
| IP00008868        | MAP1B Microtubule-associated protein 1B                                                                                                             | VSAEAEVAVSPVPTQEVVEEHCASPEDK     | h                        |
| IP00472094        | MAP2 Isoform 3 of Microtubule-associated protein 2; MAP2 Isoform 1 of Microtubule-associated protein 2                                              | DCSPPEAPSPEREVASEYK              | h                        |
| IP00472094        | MAP2 Isoform 3 of Microtubule-associated protein 2; MAP2 Isoform 1 of Microtubule-associated protein 2                                              | DKYSDGVTKSPKPR                   | h                        |
| IP00472094        | MAP2 Isoform 3 of Microtubule-associated protein 2; MAP2 Isoform 1 of Microtubule-associated protein 2                                              | ETSPESSLIQDEIAVK                 | h                        |
| IP00472094        | MAP2 Isoform 3 of Microtubule-associated protein 2; MAP2 Isoform 1 of Microtubule-associated protein 2                                              | KETSPESLIQDEIAVK                 | h                        |
| IP00472094        | MAP2 Isoform 3 of Microtubule-associated protein 2; MAP2 Isoform 1 of Microtubule-associated protein 2                                              | KTEVQAHSPSR                      | h                        |
| IP00472094        | MAP2 Isoform 3 of Microtubule-associated protein 2; MAP2 Isoform 1 of Microtubule-associated protein 2                                              | KTEVQAHSPSRK                     | h                        |
| IP00472094        | MAP2 Isoform 3 of Microtubule-associated protein 2; MAP2 Isoform 1 of Microtubule-associated protein 2                                              | RKSPVSTVVEDSR                    | h                        |
| IP00472094        | MAP2 Isoform 3 of Microtubule-associated protein 2; MAP2 Isoform 1 of Microtubule-associated protein 2                                              | TEVQAHSPSR                       | h                        |
| IP00472094        | MAP2 Isoform 3 of Microtubule-associated protein 2; MAP2 Isoform 1 of Microtubule-associated protein 2                                              | VDHGAEHTQSPGR                    | h                        |
| IP00472094        | MAP2 Isoform 3 of Microtubule-associated protein 2; MAP2 Isoform 1 of Microtubule-associated protein 2                                              | VSDGVTKSPKPR                     | h                        |
| IP00220175        | MAPT Isoform Tau-E of Microtubule-associated protein tau                                                                                            | TDHGAEIVKSPVSGDTSFR              | h                        |
| IP00219301        | MARCKS Myristoylated alanine-rich C-kinase substrate                                                                                                | EAPAEAGAAEPDGSPTAAEGEAASASSTSSPK | c; d; e; h               |
| IP00219301        | MARCKS Myristoylated alanine-rich C-kinase substrate                                                                                                | GEPAAAAPEAGASPVK                 | c; d; h                  |
| IP00219301        | MARCKS Myristoylated alanine-rich C-kinase substrate                                                                                                | VNGDASAAAAESGAK                  | h                        |
| IP00641181        | MARCKS-related protein                                                                                                                              | AAATPESQEPQAK                    | c; d; e                  |
| IP00385140        | MasA                                                                                                                                                | AAFTAGR                          | c                        |
| IP00021907        | MBP Isoform 1 of Myelin basic protein                                                                                                               | ESWGAEGQR                        | h                        |
| IP00021907        | MBP Isoform 1 of Myelin basic protein                                                                                                               | NIVTPRTPPPSGGK                   | h                        |
| IP00021907        | MBP Isoform 1 of Myelin basic protein                                                                                                               | TAHYGSLPOK                       | c; d; e; h               |
| IP00216477        | MBP Isoform 5 of Myelin basic protein; MBP Isoform 1 of Myelin basic protein                                                                        | TAHYGSLPQKSHGR                   | h                        |
| IP00216477        | MBP Isoform 5 of Myelin basic protein; MBP Isoform 1 of Myelin basic protein                                                                        | TPPPSGGK                         | c; d; e; h               |
| IP00024825        | Megakaryocyte stimulating factor                                                                                                                    | CGEYSR                           | b                        |
| IP00607580        | MEGF8 multiple EGF-like-domains 8                                                                                                                   | ALLTNVSSVALGSR                   | g                        |
| IP00607580        | MEGF8 multiple EGF-like-domains 8                                                                                                                   | VNSTELFHVDR                      | f                        |
| IP00024990        | Methylmalonate-semialdehyde dehydrogenase [acylating], mitochondrial precursor                                                                      | GYENGNFVGTIISNVKPNMTCYK          | b                        |
| IP00793751        | MFAP4 Uncharacterized protein MFAP4                                                                                                                 | FNGSVSEFR                        | f                        |
| IP00793751        | MFAP4 Uncharacterized protein MFAP4; MFAP4 Microfibril-associated glycoprotein 4 precursor                                                          | RFGNSVSEFR                       | g                        |
| IP00793751        | MFAP4 Uncharacterized protein MFAP4; MFAP4 Microfibril-associated glycoprotein 4 precursor                                                          | VLEDFENNTAYAK                    | f; g                     |
| IP00020356        | Microtubule-associated protein 1A (MAP 1A) (Proliferation-related protein p80) [Contains: MAP1 light chain LC2]                                     | SIEEACLTLQHLNR                   | b                        |
| IP00020356        | Microtubule-associated protein 1A (MAP 1A) (Proliferation-related protein p80) [Contains: MAP1 light chain LC2]                                     | SPCGLTEQYLHK                     | b                        |
| IP00374770        | Microtubule-associated protein 1B isoform 2                                                                                                         | AAEAGGAAEQYGLTTPTK               | c; d                     |
| IP00010728        | Microtubule-associated protein 2                                                                                                                    | APCFPVSEKKEEQIEK                 | b                        |
| IP00010728        | Microtubule-associated protein 2                                                                                                                    | YTRPHTLSCYK                      | b                        |
| IP00001541        | Mitochondrial import inner membrane translocase subunit TIM9 A                                                                                      | EVKPEETTCSHECLQK                 | b                        |
| IP00015602        | Mitochondrial precursor proteins import receptor                                                                                                    | AAAEQLQK                         | e                        |
| IP00377072        | mitogen-activated protein kinase 8 interacting protein 3 isoform 2, mitogen-activated protein kinase 8 interacting protein 3JNK-associated leucine- | CLHSIK                           | b                        |
| IP00219604        | mitogen-activated protein kinase kinase 1                                                                                                           | ELELMFGCQVGEAAETPPRR             | b                        |
| IP00023095        | MLF2 Myeloid leukemia factor 2                                                                                                                      | LAIQGPDPSR                       | h                        |
| IP00027780        | MMP2 72 kDa type IV collagenase precursor                                                                                                           | PFTLGNK                          | g                        |
| IP00889518        | MOG Myelin oligodendrocyte glycoprotein isoform alpha1 variant (Fragment)                                                                           | GRTELLK                          | f; g                     |
| IP00871882        | MOG Uncharacterized protein ENSP00000379932; MOG Uncharacterized protein MOG; - Uncharacterized protein ENSP0000037129                              | ISPGKNATGMEVGYRPPPSR             | f; g                     |
| IP00746595        | MOG Uncharacterized protein MOG                                                                                                                     | NATGMEVGYRPPPSR                  | f; g                     |
| IP00012505        | Mosaic serine protease, Hypothetical protein FLJ14892, Membrane-type mosaic serine protease                                                         | EQRESCFK                         | b                        |
| IP00236554        | MPO Isoform H14 of Myeloperoxidase precursor; MPO Isoform H17 of Myeloperoxidase precursor                                                          | ALLPFDNLHDDPCLLTNR               | f; g                     |
| IP00216461        | muscle-type acylphosphatase 2                                                                                                                       | VQGVCFR                          | b                        |
| IP00873260        | MYBPC1 Uncharacterized protein MYBPC1; MYBPC1 myosin binding protein C, slow type isoform 4; - 127 kDa protein; - 130 kDa protein; MY               | WMDLASKAGK                       | g                        |
| IP00026237        | Myelin-associated glycoprotein precursor, myelin associated glycoprotein isoform b precursor                                                        | VICTAR                           | b                        |
| IP00294386        | Myosin Ia                                                                                                                                           | ATPVPSPSQCKR                     | b                        |
| IP00395553        | Myotrophin, myotrophin                                                                                                                              | HHITPLLSAVYEGHVSCVK              | b                        |
| IP00219301        | Myristoylated alanine-rich C-kinase substrate                                                                                                       | AAEESPK                          | d                        |
| IP00219301        | Myristoylated alanine-rich C-kinase substrate                                                                                                       | AAEESKVEEK                       | d                        |
| IP0037541         | NAD(P) transhydrogenase, mitochondrial precursor, Hypothetical protein                                                                              | EANSIHTPGVGLCAAK                 | b                        |
| IP0037541         | NAD(P) transhydrogenase, mitochondrial precursor, Hypothetical protein                                                                              | KTCDALQK                         | b                        |
| IP00219034        | NADH dehydrogenase (ubiquinone) 1 alpha subcomplex, 8, 19kDa                                                                                        | HCAEPTFEVTCIDYTGQQLFR            | b                        |
| IP00255052        | NADH dehydrogenase (ubiquinone) 1 beta subcomplex, 9, 22kDa                                                                                         | YPEWCLDDWHPEK                    | b                        |
| IP00255052        | NADH dehydrogenase (ubiquinone) 1 beta subcomplex, 9, 22kDa                                                                                         | YDCYK                            | b                        |
| IP00220063        | NADH dehydrogenase (ubiquinone) Fe-S protein 5, 15kDa (NADH-coenzyme Q reductase).                                                                  | CHAFEK                           | b                        |
| IP00328415        | NADH-cytochrome b5 reductase, cytochrome b5 reductase soluble isoform                                                                               | DPDDHTVCHLLFANQTEK               | b                        |
| IP00220222        | NADH-ubiquinone oxidoreductase 13 kDa-B subunit                                                                                                     | TTGLVGLAVCNTPHER                 | b                        |
| IP00291328        | NADH-ubiquinone oxidoreductase 24 kDa subunit, mitochondrial precursor                                                                              | HHIQVCTITTPCMLR                  | b                        |
| IP00025796        | NADH-ubiquinone oxidoreductase 30 kDa subunit, mitochondrial precursor                                                                              | AANWYER                          | e                        |
| IP00029561        | NADH-ubiquinone oxidoreductase 42 kDa subunit, mitochondrial precursor                                                                              | SVTICDYLPHLVIYDVPVPEVQR          | b                        |
| IP00011770        | NADH-ubiquinone oxidoreductase MLRQ subunit                                                                                                         | LALFNPDVCDWR                     | b; d; e                  |
| IP00329301        | NADH-ubiquinone oxidoreductase subunit B14.7                                                                                                        | EKPDDPLNYFLGGCAGGLTGAR           | b                        |

| IPI Accession No. | Protein Description                                                                                                           | Peptide Sequence*                 | Primary Source Dataset** |
|-------------------|-------------------------------------------------------------------------------------------------------------------------------|-----------------------------------|--------------------------|
| IP100852617       | NBL1 neuroblastoma, suppression of tumorigenicity 1 1                                                                         | NTIQVHGSGCEAK                     | g                        |
| IP100795918       | NCAM1 Isoform 1 of Neural cell adhesion molecule 1; NCAM1 Isoform 2 of Neural cell adhesion molecule 1                        | TEERTPNHDGGK                      | h                        |
| IP100555628       | NCAM1 Neural cell adhesion molecule 1, 120 kDa isoform variant (Fragment)                                                     | DGQLLSSNYSNIK                     | f; g                     |
| IP100555628       | NCAM1 Neural cell adhesion molecule 1, 120 kDa isoform variant (Fragment)                                                     | GDPIPSITWR                        | f                        |
| IP100555628       | NCAM1 Neural cell adhesion molecule 1, 120 kDa isoform variant (Fragment)                                                     | ITYVENQAMELEEQVLTICEASGDPIPSITWR  | f                        |
| IP100555628       | NCAM1 Neural cell adhesion molecule 1, 120 kDa isoform variant (Fragment)                                                     | IYNTPSASYLEVTPDSEDFGNYNCTAVNR     | f; g                     |
| IP100555628       | NCAM1 Neural cell adhesion molecule 1, 120 kDa isoform variant (Fragment)                                                     | NTPSASYLEVTPDSEDFGNYNCTAVNR       | f; g                     |
| IP100555628       | NCAM1 Neural cell adhesion molecule 1, 120 kDa isoform variant (Fragment)                                                     | QNVNATANLQGSVTVLVCDAEGFPEPTMSWTK  | f                        |
| IP100555628       | NCAM1 Neural cell adhesion molecule 1, 120 kDa isoform variant (Fragment)                                                     | RDGQLLSSNYSNIK                    | f                        |
| IP100555628       | NCAM1 Neural cell adhesion molecule 1, 120 kDa isoform variant (Fragment)                                                     | TPSASYLEVTPDSEDFGNYNCTAVNR        | f                        |
| IP100555628       | NCAM1 Neural cell adhesion molecule 1, 120 kDa isoform variant (Fragment)                                                     | YNTPSASYLEVTPDSEDFGNYNCTAVNR      | f                        |
| IP100376427       | NCAM2 Neural cell adhesion molecule 2 precursor                                                                               | DKLVLPKNTNLK                      | f; g                     |
| IP100376427       | NCAM2 Neural cell adhesion molecule 2 precursor                                                                               | FISNQTIVYSWEGNPINISCDVK           | f                        |
| IP100376427       | NCAM2 Neural cell adhesion molecule 2 precursor                                                                               | LAMLANNLQILNINK                   | f                        |
| IP100376427       | NCAM2 Neural cell adhesion molecule 2 precursor                                                                               | LVLPAKNTNLK                       | f                        |
| IP100376427       | NCAM2 Neural cell adhesion molecule 2 precursor                                                                               | PINISCDVK                         | f                        |
| IP100376427       | NCAM2 Neural cell adhesion molecule 2 precursor                                                                               | SFNATAER                          | f                        |
| IP100376427       | NCAM2 Neural cell adhesion molecule 2 precursor                                                                               | YNCTATNHGTR                       | f; g                     |
| IP100159927       | NCAN Neurocan core protein precursor                                                                                          | ANATLLGLPLR                       | f; g                     |
| IP100159927       | NCAN Neurocan core protein precursor                                                                                          | PPPAVENAALIGAR                    | f; g                     |
| IP100159927       | NCAN Neurocan core protein precursor                                                                                          | RANATLLGLPLR                      | f; g                     |
| IP100375688       | NCSTN Isoform 2 of Nicastrin precursor                                                                                        | ANNSWFQSLR                        | f                        |
| IP100218109       | NDRG2 Isoform 3 of Protein NDRG2                                                                                              | TLSSQSESGTLLSSPGGHTMEVSC          | h                        |
| IP101026177       | NDRG2 Protein                                                                                                                 | SRTASLTSAAASVDGNR                 | h                        |
| IP100784368       | NDST1 Isoform 1 of Bifunctional heparan sulfate N-deacetylase/N-sulfotransferase 1                                            | ANENSLSAQLK                       | f                        |
| IP100293836       | Nectin-like protein 3                                                                                                         | AYLTVLGVPEKPOISGFSSPMVEGDLMLQLTCK | b                        |
| IP101025089       | NEFH neurofilament heavy polypeptide; NEFH Isoform 1 of Neurofilament heavy polypeptide                                       | AEAKSPEK                          | h                        |
| IP101025089       | NEFH neurofilament heavy polypeptide; NEFH Isoform 1 of Neurofilament heavy polypeptide                                       | AKSPAKEAK                         | h                        |
| IP101025089       | NEFH neurofilament heavy polypeptide; NEFH Isoform 1 of Neurofilament heavy polypeptide                                       | AKSPEKAK                          | h                        |
| IP101025089       | NEFH neurofilament heavy polypeptide; NEFH Isoform 1 of Neurofilament heavy polypeptide                                       | AKSPEKEAK                         | h                        |
| IP101025089       | NEFH neurofilament heavy polypeptide; NEFH Isoform 1 of Neurofilament heavy polypeptide                                       | AKSPEKEAKSPEK                     | h                        |
| IP101025089       | NEFH neurofilament heavy polypeptide; NEFH Isoform 1 of Neurofilament heavy polypeptide                                       | AKSPLKEDAK                        | h                        |
| IP101025089       | NEFH neurofilament heavy polypeptide; NEFH Isoform 1 of Neurofilament heavy polypeptide                                       | AKSPTKEAK                         | h                        |
| IP101025089       | NEFH neurofilament heavy polypeptide; NEFH Isoform 1 of Neurofilament heavy polypeptide                                       | AKSPTKEAKSPEK                     | h                        |
| IP101025089       | NEFH neurofilament heavy polypeptide; NEFH Isoform 1 of Neurofilament heavy polypeptide                                       | AKSPVKEAK                         | h                        |
| IP101025089       | NEFH neurofilament heavy polypeptide; NEFH Isoform 1 of Neurofilament heavy polypeptide                                       | AKSPVKEAKSPEK                     | h                        |
| IP101025089       | NEFH neurofilament heavy polypeptide; NEFH Isoform 1 of Neurofilament heavy polypeptide                                       | AKSPVKEAK                         | h                        |
| IP101025089       | NEFH neurofilament heavy polypeptide; NEFH Isoform 1 of Neurofilament heavy polypeptide                                       | AKSPVKEAKSPEK                     | h                        |
| IP101025089       | NEFH neurofilament heavy polypeptide; NEFH Isoform 1 of Neurofilament heavy polypeptide                                       | AKSPVKEEVK                        | h                        |
| IP101025089       | NEFH neurofilament heavy polypeptide; NEFH Isoform 1 of Neurofilament heavy polypeptide                                       | AKSPVKEEVKSPEK                    | h                        |
| IP101025089       | NEFH neurofilament heavy polypeptide; NEFH Isoform 1 of Neurofilament heavy polypeptide                                       | EAKSPVKEAK                        | h                        |
| IP101025089       | NEFH neurofilament heavy polypeptide; NEFH Isoform 1 of Neurofilament heavy polypeptide                                       | EEARSPADKFPK                      | h                        |
| IP101025089       | NEFH neurofilament heavy polypeptide; NEFH Isoform 1 of Neurofilament heavy polypeptide                                       | SPAEEKSPEK                        | h                        |
| IP101025089       | NEFH neurofilament heavy polypeptide; NEFH Isoform 1 of Neurofilament heavy polypeptide                                       | SPAEVKSPEK                        | h                        |
| IP101025089       | NEFH neurofilament heavy polypeptide; NEFH Isoform 1 of Neurofilament heavy polypeptide                                       | SPPAEAEASPEK                      | h                        |
| IP101025089       | NEFH neurofilament heavy polypeptide; NEFH Isoform 1 of Neurofilament heavy polypeptide                                       | SPPAEAEASPEKAK                    | h                        |
| IP101025089       | NEFH neurofilament heavy polypeptide; NEFH Isoform 1 of Neurofilament heavy polypeptide                                       | SPVKEAK                           | h                        |
| IP101025089       | NEFH neurofilament heavy polypeptide; NEFH Isoform 1 of Neurofilament heavy polypeptide                                       | SPVKEAKSPEK                       | h                        |
| IP101025089       | NEFH neurofilament heavy polypeptide; NEFH Isoform 1 of Neurofilament heavy polypeptide                                       | TLDVKSPEAK                        | h                        |
| IP100853115       | NEFM NEFM protein                                                                                                             | AGGEGGSEEGSDKGAK                  | c; h                     |
| IP100853115       | NEFM NEFM protein                                                                                                             | GKSPVKSPEVEK                      | h                        |
| IP100853115       | NEFM NEFM protein                                                                                                             | KSPVKATAPEVK                      | h                        |
| IP100853115       | NEFM NEFM protein                                                                                                             | SPVEAK                            | c; d; h                  |
| IP100217507       | NEFM Neurofilament medium polypeptide                                                                                         | AGGEGGSEEGSDK                     | c; d; e; h               |
| IP100217507       | NEFM Neurofilament medium polypeptide                                                                                         | AKSPVKSPEVEAK                     | h                        |
| IP100217507       | NEFM Neurofilament medium polypeptide                                                                                         | AKSPVKSPEVEK                      | h                        |
| IP100217507       | NEFM Neurofilament medium polypeptide                                                                                         | EGSSEKEEGEQEGETEAEAEAEAEAK        | h                        |
| IP100217507       | NEFM Neurofilament medium polypeptide                                                                                         | GKSPVPK                           | h                        |
| IP100217507       | NEFM Neurofilament medium polypeptide                                                                                         | GKSPVKSPEVEK                      | h                        |
| IP100217507       | NEFM Neurofilament medium polypeptide                                                                                         | GVVTNGLDLSPEDEK                   | h                        |
| IP100217507       | NEFM Neurofilament medium polypeptide                                                                                         | GVVTNGLDLSPEDEK                   | h                        |
| IP100217507       | NEFM Neurofilament medium polypeptide                                                                                         | KAESPVKEEAAEVVTTIK                | h                        |
| IP100217507       | NEFM Neurofilament medium polypeptide                                                                                         | SPVKSPEVEAK                       | h                        |
| IP100217507       | NEFM Neurofilament medium polypeptide                                                                                         | SPVKSPEVEK                        | h                        |
| IP100217507       | NEFM Neurofilament medium polypeptide                                                                                         | SPVKSPEVEK                        | h                        |
| IP10089219        | NEFM neurofilament, medium polypeptide 150kDa isoform 1; - NEFM protein; NEFM Neurofilament medium polypeptide                | HLREYQDLLNVK                      | f                        |
| IP100176221       | NEGR1 Neuronal growth regulator 1 precursor                                                                                   | ATGKPEPSISWR                      | f                        |
| IP100176221       | NEGR1 Neuronal growth regulator 1 precursor                                                                                   | GAWLNR                            | f; g                     |
| IP100176221       | NEGR1 Neuronal growth regulator 1 precursor                                                                                   | KLFGQQGHIQNFSTR                   | f                        |
| IP100176221       | NEGR1 Neuronal growth regulator 1 precursor                                                                                   | SILTVTNVTOHQHFNVT                 | f                        |
| IP100176221       | NEGR1 Neuronal growth regulator 1 precursor                                                                                   | SILTVTNVTOHQHFNVTCAANK            | f                        |
| IP100015260       | NELL2 Protein kinase C-binding protein NELL2 precursor                                                                        | QVPLHNGTK                         | g                        |
| IP100556554       | NEO1 Neogenin homolog 1 variant                                                                                               | TLSDVPSAAPQNLSEVLR                | f                        |
| IP100435020       | Neural cell adhesion molecule 1, 140 kDa isoform precursor                                                                    | AAHFVFR                           | c; d                     |
| IP100302448       | Neural cell adhesion molecule 1, 140 kDa isoform precursor.Similar to neural cell adhesion molecule 1                         | KVDKNDAAEYICIAENK                 | b                        |
| IP100302448       | Neural cell adhesion molecule 1, 140 kDa isoform precursor.Similar to neural cell adhesion molecule 1                         | YDKNDAAEYICIAENK                  | b                        |
| IP100292672       | Neurexin 1-beta precursor                                                                                                     | CGAELGSPGGGGGGGGGAGGR             | b; d                     |
| IP100159927       | Neurocan core protein precursor                                                                                               | FDAYCFR                           | b; d                     |
| IP100159927       | Neurocan core protein precursor                                                                                               | WDRPQIVCTKPR                      | b                        |
| IP100237671       | Neurofilament, light polypeptide 68kDa                                                                                        | AAKDEVSESR                        | c                        |
| IP100019952       | Neuronal membrane glycoprotein M6-a                                                                                           | ICTVSENFLR                        | b                        |
| IP100019952       | Neuronal membrane glycoprotein M6-a                                                                                           | KICTVSENFLR                       | b                        |
| IP100032902       | Neutral sphingomyelinase II                                                                                                   | IACHTLHAPQEDSAIR                  | b                        |
| IP100513705       | NFASC Isoform 1 of Neurofascin precursor                                                                                      | AVYQCNTSNEHGVIYLLANAFVSLDVPFR     | f; g                     |
| IP100513705       | NFASC Isoform 1 of Neurofascin precursor                                                                                      | NGQGSNLDGGNVHYVYENGSLK            | f; g                     |
| IP100513705       | NFASC Isoform 1 of Neurofascin precursor                                                                                      | WANITWK                           | f; g                     |
| IP100655858       | NFASC Isoform 11 of Neurofascin precursor                                                                                     | VLTNHPYDSSLR                      | f; g                     |
| IP100655858       | NFASC Isoform 11 of Neurofascin precursor; NFASC Isoform 8 of Neurofascin precursor; NFASC Isoform 3 of Neurofascin precursor | QIVYENFSPNQTK                     | i                        |
| IP100655702       | NFASC Isoform 5 of Neurofascin precursor                                                                                      | AVYQCNTSNEHGVIYLLANAF             | f; g                     |
| IP100655702       | NFASC Isoform 5 of Neurofascin precursor                                                                                      | HNFGPTGDFVVEYDINSNITK             | f; g                     |
| IP100655702       | NFASC Isoform 5 of Neurofascin precursor                                                                                      | NNMEITWTFPMNATSAFGPNLR            | f                        |
| IP100655702       | NFASC Isoform 5 of Neurofascin precursor                                                                                      | VSVLDVPPRMLSPR                    | f; g                     |
| IP100655702       | NFASC Isoform 5 of Neurofascin precursor                                                                                      | WFKNGQGSNLDGGNVHYVYENGSLK         | f                        |
| IP100655702       | NFASC Isoform 5 of Neurofascin precursor                                                                                      | YHYVYENGSLK                       | f; g                     |
| IP100655702       | NFASC Isoform 5 of Neurofascin precursor; NFASC Isoform 1 of Neurofascin precursor                                            | EAWNVTYVWGR                       | f; g                     |
| IP100000760       | NG,NG-dimethylarginine dimethylaminohydrolase 2                                                                               | AGAGLSSLCLVLSRPHS                 | b                        |
| IP100000760       | NG,NG-dimethylarginine dimethylaminohydrolase 2                                                                               | CSHALIR                           | b                        |

| IPI Accession No. | Protein Description                                                                                                                                                                               | Peptide Sequence*             | Primary Source Dataset** |
|-------------------|---------------------------------------------------------------------------------------------------------------------------------------------------------------------------------------------------|-------------------------------|--------------------------|
| IP100293033       | NID2 NID2 protein                                                                                                                                                                                 | IHQNTYQVCR                    | f g                      |
| IP100293033       | NID2 NID2 protein                                                                                                                                                                                 | TLLSLHGHSIVGIDYDCR            | f g                      |
| IP100023779       | Nirrlase homolog 1                                                                                                                                                                                | LGACLAFLPEAFDFIAR             | b                        |
| IP100759630       | NOL8 Isoform 2 of Nucleolar protein 8; NOL8 Uncharacterized protein NOL8; NOL8 Isoform 3 of Nucleolar protein 8; NOL8 Isoform 1 of Nucleolar protein 8                                            | WRGVGSNMSRNSWEAR              | g                        |
| IP100440580       | Novel protein                                                                                                                                                                                     | AAATMEVK                      | a                        |
| IP100301579       | NPC2 Epididymal secretory protein E1 precursor                                                                                                                                                    | GQSYSNVNTFTSNIQSK             | g                        |
| IP100872327       | NPTN 31 kDa protein; NPTN Isoform 3 of Neuroplastin precursor; NPTN Isoform 4 of Neuroplastin precursor; NPTN Isoform 2 of Neuroplastin precursor                                                 | ENGMPPMDIVNTSGR               | f                        |
| IP100018311       | NPTN Isoform 2 of Neuroplastin precursor                                                                                                                                                          | DSVPLPVLTCQLNLTSSSHLTYSYVTK   | f                        |
| IP100018311       | NPTN Isoform 2 of Neuroplastin precursor                                                                                                                                                          | KENGMPPMDIVNTSGR              | f g                      |
| IP100654584       | NPTN Isoform 4 of Neuroplastin precursor; NPTN Isoform 2 of Neuroplastin precursor                                                                                                                | DSVPLPVLTCQLNLTSSSH           | f                        |
| IP100026946       | NPTX2 Neuronal pentraxin-2 precursor                                                                                                                                                              | ANVSNAGLPGDFR                 | f                        |
| IP100655818       | NRCAM 144 kDa protein                                                                                                                                                                             | FTYDKDHLVVA                   | g                        |
| IP100655818       | NRCAM 144 kDa protein                                                                                                                                                                             | GSALHEDIYVL                   | g                        |
| IP100655818       | NRCAM 144 kDa protein                                                                                                                                                                             | GSALHEDIYVLH                  | g                        |
| IP100655818       | NRCAM 144 kDa protein                                                                                                                                                                             | HENGLEIPIVAQK                 | g                        |
| IP100333777       | NRCAM Isoform 2 of Neuronal cell adhesion molecule precursor                                                                                                                                      | ERPPTFLTPEGNASNKEELR          | f                        |
| IP100333777       | NRCAM Isoform 2 of Neuronal cell adhesion molecule precursor                                                                                                                                      | GSALHEDIYVLHENGLEIPIVAQK      | f g                      |
| IP100333777       | NRCAM Isoform 2 of Neuronal cell adhesion molecule precursor                                                                                                                                      | QKGDDEWTSVVVANVSK             | f g                      |
| IP100873446       | NRCAM Isoform 5 of Neuronal cell adhesion molecule precursor; NRCAM Isoform 1 of Neuronal cell adhesion molecule precursor                                                                        | VISVDELNDTIAANLSDTEFYGAK      | f                        |
| IP100873446       | NRCAM Isoform 5 of Neuronal cell adhesion molecule precursor; NRCAM Isoform 2 of Neuronal cell adhesion molecule precursor                                                                        | PPFDLEDLQDK                   | f                        |
| IP100873446       | NRCAM Isoform 5 of Neuronal cell adhesion molecule precursor; NRCAM Isoform 2 of Neuronal cell adhesion molecule precursor                                                                        | SSAVYQCNSAEYGYLLANAFVNVLAEPFR | f g                      |
| IP100883753       | NRCAM NRCAM protein                                                                                                                                                                               | FNHTQTQK                      | f g                      |
| IP100883753       | NRCAM NRCAM protein                                                                                                                                                                               | NLNFSTR                       | f                        |
| IP100883753       | NRCAM NRCAM protein                                                                                                                                                                               | YQPINSTHELGPLVDLK             | f g                      |
| IP100883753       | NRCAM NRCAM protein; NRCAM Isoform 5 of Neuronal cell adhesion molecule precursor; NRCAM 144 kDa protein; NRCAM Isoform 4 of Neuronal cell adhesion molecule precursor                            | LSPVYNSFR                     | f                        |
| IP100883753       | NRCAM NRCAM protein; NRCAM Isoform 5 of Neuronal cell adhesion molecule precursor; NRCAM 144 kDa protein; NRCAM Isoform 4 of Neuronal cell adhesion molecule precursor                            | VNVVNTLAEVHWDPVPLK            | f g                      |
| IP100442299       | NRXN1 Isoform 1 of Neurexin-1-alpha precursor                                                                                                                                                     | YNSSOVLVDSGEVK                | f g                      |
| IP100607648       | NRXN1 Isoform 2 of Neurexin-1-alpha precursor                                                                                                                                                     | NTLTFDQVEAK                   | f g                      |
| IP100009456       | NTSE 5'-nucleotidase precursor                                                                                                                                                                    | GNVSSHGPNLSSIPEDPSIK          | f g                      |
| IP100009456       | NTSE 5'-nucleotidase precursor                                                                                                                                                                    | IKLDNYSYQELGK                 | f g                      |
| IP100872117       | NTRK2 Tyrosine-protein kinase receptor (Fragment)                                                                                                                                                 | GNPKPALQWVYNGAILNESK          | f                        |
| IP100872117       | NTRK2 Tyrosine-protein kinase receptor (Fragment)                                                                                                                                                 | LEPNSVDPENITEFIANQK           | f                        |
| IP100872117       | NTRK2 Tyrosine-protein kinase receptor (Fragment)                                                                                                                                                 | NSNLQHINFR                    | f g                      |
| IP100376986       | NTRK3 Isoform D of NT-3 growth factor receptor precursor; NTRK3 Isoform A of NT-3 growth factor receptor precursor                                                                                | NTSIHIEWNR                    | f g                      |
| IP100910634       | NUCKS1 cDNA FL61403, highly similar to Nuclear ubiquitously casein and cyclin-dependent kinases substrate; NUCKS1 Isoform 1 of Nuclear ubiquitously casein and cyclin-dependent kinases substrate | NSQEDSESDKDKV                 | b                        |
| IP100333198       | Nuclear transcription factor/patch receptor regulator; Hypothetical protein KIAA1819                                                                                                              | EPGETLCSK                     | b                        |
| IP100099091       | Nuclear transport factor 2                                                                                                                                                                        | IQHSHTAQDHQPTDSCISMVVGQLK     | b                        |
| IP100100715       | Obscurin                                                                                                                                                                                          | AAPVEWRK                      | a                        |
| IP100100715       | Obscurin                                                                                                                                                                                          | CSASPLR                       | b                        |
| IP100100715       | Obscurin                                                                                                                                                                                          | MRQLVYVQAGQADAGEYCEAGGQR      | b                        |
| IP100100715       | Obscurin                                                                                                                                                                                          | RVEMCISK                      | b                        |
| IP100182194       | ODZ2 Teneurin-2                                                                                                                                                                                   | FNISLGG                       | f                        |
| IP100737429       | ODZ4 Teneurin-4                                                                                                                                                                                   | FNVSLGK                       | f                        |
| IP100737429       | ODZ4 Teneurin-4                                                                                                                                                                                   | IFPSGNVTNLELR                 | f                        |
| IP100737429       | ODZ4 Teneurin-4                                                                                                                                                                                   | LTNVTFPTGQVSSFR               | f                        |
| IP100640201       | OFD1 Uncharacterized protein OFD1; OFD1 Isoform 1 of Oral-facial-digital syndrome 1 protein                                                                                                       | EESRVENLRLLNR                 | g                        |
| IP100419820       | OLFMI NOELIN1_V3; OLFMI Isoform 1 of Noelin precursor                                                                                                                                             | LDPVSLQTLQVWTSYPK             | f                        |
| IP100472517       | OLFMI olfactomedin related ER localized protein isoform 1                                                                                                                                         | EYVQNLISVNLQEQEIGAYVDDELQSR   | f g                      |
| IP100472517       | OLFMI olfactomedin related ER localized protein isoform 1                                                                                                                                         | VHYAVQTNASTYVEIDPFQNK         | f                        |
| IP100394820       | OLFML1 Olfactomedin-like protein 1 precursor                                                                                                                                                      | NNTVWEFANIR                   | f                        |
| IP100607652       | OLFML3 Isoform 2 of Olfactomedin-like protein 3 precursor; OLFML3 Isoform 1 of Olfactomedin-like protein 3 precursor                                                                              | IYVLDGQTQNTAFVFR              | f g                      |
| IP100295832       | OMG Oligodendrocyte-myelin glycoprotein precursor                                                                                                                                                 | QNTYLLK                       | f g                      |
| IP100295832       | OMG Oligodendrocyte-myelin glycoprotein precursor                                                                                                                                                 | SLEVLNLSNKK                   | f g                      |
| IP100295832       | OMG Oligodendrocyte-myelin glycoprotein precursor                                                                                                                                                 | SLEVLNLSNKKL                  | f g                      |
| IP100295832       | OMG Oligodendrocyte-myelin glycoprotein precursor                                                                                                                                                 | SLWNMSAANNIK                  | f g                      |
| IP100295832       | OMG Oligodendrocyte-myelin glycoprotein precursor                                                                                                                                                 | WSCDHKQNTYLLK                 | f                        |
| IP100525450       | OPCML Opioid binding protein/cell adhesion molecule-like isoform b preproprotein; OPCML Opioid-binding protein/cell adhesion molecule precursor                                                   | DYNGNYCVATNK                  | f                        |
| IP100525450       | OPCML Opioid binding protein/cell adhesion molecule-like isoform b preproprotein; OPCML Opioid-binding protein/cell adhesion molecule precursor                                                   | DYNGNYCVATNKL                 | f                        |
| IP100001662       | OPCML Opioid-binding protein/cell adhesion molecule precursor                                                                                                                                     | MSTLTFNVSEK                   | f g                      |
| IP100001662       | OPCML Opioid-binding protein/cell adhesion molecule precursor                                                                                                                                     | STLTFNVSEK                    | f g                      |
| IP100013376       | Orexin receptor type 2                                                                                                                                                                            | WFFGQSLCK                     | b                        |
| IP100022429       | ORM1 Alpha-1-acid glycoprotein 1 precursor                                                                                                                                                        | CANLVVPVITNATLDQITGK          | g                        |
| IP100022429       | ORM1 Alpha-1-acid glycoprotein 1 precursor                                                                                                                                                        | LVPVITNATLDQITGK              | f g                      |
| IP100022429       | ORM1 Alpha-1-acid glycoprotein 1 precursor                                                                                                                                                        | PITNATLDQITGK                 | g                        |
| IP100022429       | ORM1 Alpha-1-acid glycoprotein 1 precursor                                                                                                                                                        | PLCANLVVPVITNATLDQITGK        | g                        |
| IP100022429       | ORM1 Alpha-1-acid glycoprotein 1 precursor                                                                                                                                                        | PVPITNATLDQITGK               | g                        |
| IP100022429       | ORM1 Alpha-1-acid glycoprotein 1 precursor                                                                                                                                                        | QDQCYNTYLVNQR                 | f g                      |
| IP100022429       | ORM1 Alpha-1-acid glycoprotein 1 precursor                                                                                                                                                        | QIPLCANLVVPVITNATLDQITGK      | f g                      |
| IP100022429       | ORM1 Alpha-1-acid glycoprotein 1 precursor                                                                                                                                                        | TYMLAFVDNDEK                  | g                        |
| IP100022429       | ORM1 Alpha-1-acid glycoprotein 1 precursor                                                                                                                                                        | YPTNATLDQITGK                 | g                        |
| IP100884926       | ORM1 orosomucoid 1 precursor                                                                                                                                                                      | CANLVVPVITNATLDR              | f g                      |
| IP100884926       | ORM1 orosomucoid 1 precursor                                                                                                                                                                      | LVPVITNATLDR                  | f g                      |
| IP100884926       | ORM1 orosomucoid 1 precursor                                                                                                                                                                      | NTYLVNQR                      | g                        |
| IP100884926       | ORM1 orosomucoid 1 precursor                                                                                                                                                                      | SVQEIQAIFYFTPNKTEDTIFLR       | f g                      |
| IP100020091       | ORM2 Alpha-1-acid glycoprotein 2 precursor                                                                                                                                                        | ANLVVPVITNATLDR               | g                        |
| IP100020091       | ORM2 Alpha-1-acid glycoprotein 2 precursor                                                                                                                                                        | ATFFYFTPNKTEDTIFLR            | g                        |
| IP100020091       | ORM2 Alpha-1-acid glycoprotein 2 precursor                                                                                                                                                        | CANLVVPVITNATLDRITGK          | g                        |
| IP100020091       | ORM2 Alpha-1-acid glycoprotein 2 precursor                                                                                                                                                        | FTPNKTEDTIFLR                 | g                        |
| IP100020091       | ORM2 Alpha-1-acid glycoprotein 2 precursor                                                                                                                                                        | FYFTPNKTEDTIFLR               | g                        |
| IP100020091       | ORM2 Alpha-1-acid glycoprotein 2 precursor                                                                                                                                                        | NLVVPVITNATLDR                | g                        |
| IP100020091       | ORM2 Alpha-1-acid glycoprotein 2 precursor                                                                                                                                                        | NSSLVNQR                      | f g                      |
| IP100020091       | ORM2 Alpha-1-acid glycoprotein 2 precursor                                                                                                                                                        | PITNATLDR                     | g                        |
| IP100020091       | ORM2 Alpha-1-acid glycoprotein 2 precursor                                                                                                                                                        | PLCANLVVPVITNATLDR            | f g                      |
| IP100020091       | ORM2 Alpha-1-acid glycoprotein 2 precursor                                                                                                                                                        | PVPITNATLDR                   | g                        |
| IP100020091       | ORM2 Alpha-1-acid glycoprotein 2 precursor                                                                                                                                                        | QIPLCANLVVPVITNATLDR          | f g                      |
| IP100020091       | ORM2 Alpha-1-acid glycoprotein 2 precursor                                                                                                                                                        | QIPLCANLVVPVITNATLDRITGK      | f g                      |
| IP100020091       | ORM2 Alpha-1-acid glycoprotein 2 precursor                                                                                                                                                        | QNCQFVNSLVNQR                 | f g                      |
| IP100020091       | ORM2 Alpha-1-acid glycoprotein 2 precursor                                                                                                                                                        | YFTPNKTEDTIFLR                | f g                      |
| IP100020091       | ORM2 Alpha-1-acid glycoprotein 2 precursor                                                                                                                                                        | YNSSLVNQR                     | f g                      |
| IP100020091       | ORM2 Alpha-1-acid glycoprotein 2 precursor                                                                                                                                                        | NEEYNSVQEIQAT                 | g                        |
| IP100020091       | ORM2 Alpha-1-acid glycoprotein 2 precursor                                                                                                                                                        | QCFVNSLVNQR                   | g                        |
| IP100295485       | Osmotic stress protein 94                                                                                                                                                                         | CHAEHTPEEIDHTGAK              | b                        |
| IP100295485       | Osmotic stress protein 94                                                                                                                                                                         | KPVADCVSIPSFDAER              | b                        |
| IP100295485       | Osmotic stress protein 94                                                                                                                                                                         | NFDEALVDVCFDEFK               | b                        |
| IP100293328       | P2RX7 P2X purinoceptor 7                                                                                                                                                                          | NNIDFPGHNYTR                  | f                        |
| IP100293328       | P2RX7 P2X purinoceptor 7                                                                                                                                                                          | PALLNSAENFTVLK                | f g                      |
| IP100293328       | P2RX7 P2X purinoceptor 7                                                                                                                                                                          | TTNVSILVPGYNFR                | f g                      |

| IPI Accession No. | Protein Description                                                                                                                               | Peptide Sequence*                 | Primary Source Dataset** |
|-------------------|---------------------------------------------------------------------------------------------------------------------------------------------------|-----------------------------------|--------------------------|
| IP100293238       | P2X purinoceptor 7                                                                                                                                | CVVHEGNOK                         | b                        |
| IP100297833       | P53 inducible protein,Hypothetical protein KIAA1168                                                                                               | FCSEVK                            | b                        |
| IP100297833       | P53 inducible protein,Hypothetical protein KIAA1168                                                                                               | LCHAER                            | b                        |
| IP100983750       | PAK1 Protein; PAK1 cDNA FLJ30666 fis, clone FCBBF1000627, highly similar to Serine/threonine-protein kinase PAK 1; PAK1 Uncharacterized           | DVATSPISPTENNTTPDALTR             | h                        |
| IP100301023       | PALM Isoform 1 of Paralemmin-1; PALM Isoform 2 of Paralemmin-1                                                                                    | APAPSPAKEER                       | h                        |
| IP100002412       | Palmitoyl-protein thioesterase 1 precursor                                                                                                        | CDFIR                             | b                        |
| IP100002412       | Palmitoyl-protein thioesterase 1 precursor                                                                                                        | CPGESSHICDFIR                     | b                        |
| IP100002412       | Palmitoyl-protein thioesterase 1 precursor                                                                                                        | CPSPMNLISVGGQHQGVFLPR             | b; d                     |
| IP100645060       | PBXIP1 Isoform 2 of Pre-B-cell leukemia transcription factor-interacting protein 1; PBXIP1 Isoform 1 of Pre-B-cell leukemia transcription factor- | LOGLENWGDQPGVSANASK               | f                        |
| IP100215992       | PCDH1 protocadherin 1 isoform 1 precursor; PCDH1 protocadherin 1 isoform 2 precursor                                                              | ANDSDQGANAEIEYTFHQAPEVVR          | f                        |
| IP100215992       | PCDH1 protocadherin 1 isoform 1 precursor; PCDH1 protocadherin 1 isoform 2 precursor                                                              | YGTALVHLVYNETLANR                 | f                        |
| IP100215946       | PCDH7 Isoform B of Protocadherin-7 precursor; PCDH7 Isoform A of Protocadherin-7 precursor                                                        | NISYTLPPSSNVR                     | f                        |
| IP100289870       | PCDH7 Isoform C of Protocadherin-7 precursor                                                                                                      | IDNLTGELSTSER                     | f                        |
| IP100409626       | PCDH9 protocadherin 9 isoform 1 precursor                                                                                                         | DLNISHINAATGTSASLVYR              | f                        |
| IP100409626       | PCDH9 protocadherin 9 isoform 1 precursor; PCDH9 Protocadherin-9 precursor                                                                        | ATVTINVTVDNDPPNIDL                | f; g                     |
| IP100409626       | PCDH9 protocadherin 9 isoform 1 precursor; PCDH9 Protocadherin-9 precursor                                                                        | IVASDSGKPSLNQATALVR               | f                        |
| IP100409626       | PCDH9 protocadherin 9 isoform 1 precursor; PCDH9 Protocadherin-9 precursor                                                                        | LFALNNTGLTIVQR                    | f; g                     |
| IP100409626       | PCDH9 protocadherin 9 isoform 1 precursor; PCDH9 Protocadherin-9 precursor                                                                        | LVVNSIDLGYPK                      | f                        |
| IP100409667       | PCDHGC3 Isoform 3 of Protocadherin gamma-C3 precursor; PCDHGC3 Isoform 2 of Protocadherin gamma-C3 precursor; PCDHGC3;PCDHGA                      | ETVPEVNLISITAR                    | f                        |
| IP100409667       | PCDHGC3 Isoform 3 of Protocadherin gamma-C3 precursor; PCDHGC3 Isoform 2 of Protocadherin gamma-C3 precursor; PCDHGC3;PCDHGA                      | VLDANDNAPVFNQSLYR                 | f                        |
| IP100479143       | PCNT Pericentrin                                                                                                                                  | QLQSELLLVK                        | g                        |
| IP100643663       | PCSK2 Proprotein convertase subtilisin/kexin type 2; PCSK2 Neuroendocrine convertase 2 precursor                                                  | YLEHVQAVITVNAIR                   | g                        |
| IP100384280       | PCYOX1 Prenylcysteine oxidase 1 precursor                                                                                                         | GELNTSPSRPDK                      | f                        |
| IP100643342       | PEA15 cDNA FLJ38560 fis, clone HCHON2003642, highly similar to Astrocytic Phosphoprotein PEA-1 PEA15 Uncharacterized protein; PEA15               | DIIKRFSEEEIHK                     | h                        |
| IP100643342       | PEA15 cDNA FLJ38560 fis, clone HCHON2003642, highly similar to Astrocytic Phosphoprotein PEA-1 PEA15 Uncharacterized protein; PEA15               | QPSEEEKK                          | c; h                     |
| IP100219446       | PEBP1 Phosphatidylethanolamine-binding protein 1                                                                                                  | YVWLVYEQDR                        | d                        |
| IP100013723       | Peptidyl-prolyl cis-trans isomerase NIMA-interacting 1                                                                                            | CSHLLVK                           | b                        |
| IP10026519        | Peptidyl-prolyl cis-trans isomerase, mitochondrial precursor                                                                                      | HVGPVGLSMANAGPNTNGSQFFICTK        | b                        |
| IP10026519        | Peptidyl-prolyl cis-trans isomerase, mitochondrial precursor                                                                                      | KIVITDCQLS                        | b                        |
| IP100107117       | Peptidylprolyl isomerase B                                                                                                                        | DKPLKDVHADCGK                     | b                        |
| IP100107117       | Peptidylprolyl isomerase B                                                                                                                        | DVIADCGK                          | b                        |
| IP100000874       | Peroxiredoxin 1                                                                                                                                   | HGEVCPAGWPKGSDTKPDVQK             | b                        |
| IP100000874       | Peroxiredoxin 1                                                                                                                                   | LNCQVIGASVDSHFCHLAWVNTPK          | b                        |
| IP10024915        | Peroxiredoxin 5, mitochondrial precursor,peroxiredoxin 5 precursor isoform b                                                                      | RGVLFVGPVGFATPGCSK                | b                        |
| IP10024348        | Peroxisomal membrane protein PEX13                                                                                                                | AATSAAK                           | c                        |
| IP100827590       | PGAP1 Isoform 2 of GPI inositol-deacylase; PGAP1 Isoform 1 of GPI inositol-deacylase                                                              | HINLTLTSVAGGFR                    | f                        |
| IP100982931       | PGBD5 cDNA FLJ57838, highly similar to Homo sapiens piggyBac transposable element derived 5 (PGBD5), mRNA; PGBD5 PiggyBac transposon              | ELLGLLEDASPTI                     | g                        |
| IP100007664       | PGCP Plasma glutamate carboxypeptidase precursor; PGCP 60 kDa protein                                                                             | IVVYNQVYNSYR                      | h                        |
| IP100394992       | PGLYRP2 Isoform 2 of N-acetylmuramoyl-L-alanine amidase precursor                                                                                 | GFVVAIGNYTAALPTEAALR              | g                        |
| IP100173346       | PGM2L1 Glucose 1,6-bisphosphate synthase                                                                                                          | AVAGVMITASHNR                     | h                        |
| IP100922847       | PGRMC1 cDNA FLJ50115, moderately similar to Membrane-associated progesterone receptor component 1; PGRMC1 Membrane-associated pro                 | EGEPTVYSDEEPEKDESAR               | d; e; h                  |
| IP100300074       | Phenylalanyl-tRNA synthetase beta chain                                                                                                           | CAEIFAR                           | b                        |
| IP100300074       | Phenylalanyl-tRNA synthetase beta chain                                                                                                           | HLCAVYVYNK                        | b                        |
| IP100384161       | Phosphatidylinositol-4-phosphate 5-kinase type III,Phosphatidylinositol-4-phosphate 5-kinase type II alpha                                        | CHENSFR                           | b                        |
| IP100384161       | Phosphatidylinositol-4-phosphate 5-kinase type III,Phosphatidylinositol-4-phosphate 5-kinase type II alpha                                        | EYCPMVR                           | b                        |
| IP100384161       | Phosphatidylinositol-4-phosphate 5-kinase type III,Phosphatidylinositol-4-phosphate 5-kinase type II alpha                                        | FKEYCPMVR                         | b                        |
| IP10009635        | PHR1 isoform 1,PHR1 isoform 2                                                                                                                     | LHLCAETK                          | b                        |
| IP10007634        | PINCH protein,IP100386321.1 ENSEMBL:ENSP00000328927,IP100335372.2 ENSEMBL:ENSP00000272464                                                         | CEKPLGHR                          | b                        |
| IP10007634        | PINCH protein,IP100386321.1 ENSEMBL:ENSP00000328927,IP100335372.2 ENSEMBL:ENSP00000272464                                                         | NDPVYHPDHFNCAKCGK                 | b                        |
| IP100220644       | PKM2 Isoform M1 of Pyruvate kinase isozymes M1/M2                                                                                                 | GADFLVTEVENGSLGSK                 | g                        |
| IP100301975       | Placental ribonuclease inhibitor                                                                                                                  | LGVDGMAELCPGLLHSSR                | b                        |
| IP100301975       | Placental ribonuclease inhibitor                                                                                                                  | SCSFATAACSHSFVSLAQR               | b                        |
| IP100301975       | Placental ribonuclease inhibitor                                                                                                                  | SNELGDVGVHCVLQGLQTPSCK            | b                        |
| IP100301975       | Placental ribonuclease inhibitor                                                                                                                  | TLPTLQELHLSNDLIGDAGLQLLCEGLLDPQCR | b                        |
| IP100006644       | Plexin-B1 SEP receptor precursor,Hypothetical protein KIAA0407                                                                                    | HHLYCEPVEQPLR                     | b                        |
| IP100006644       | Plexin-B1 SEP receptor precursor,Hypothetical protein KIAA0407                                                                                    | VVVGDPQCHLLPEQQEQLR               | b                        |
| IP100643034       | PLTP Isoform 1 of Phospholipid transfer protein precursor                                                                                         | ALPLQAPLK                         | g                        |
| IP100643034       | PLTP Isoform 1 of Phospholipid transfer protein precursor                                                                                         | EGHFYNNISEVK                      | g                        |
| IP100643034       | PLTP Isoform 1 of Phospholipid transfer protein precursor                                                                                         | GKEGHFYNNISEVK                    | g                        |
| IP100643034       | PLTP Isoform 1 of Phospholipid transfer protein precursor                                                                                         | FYSNSHALESALPLQAPLK               | g                        |
| IP100643034       | PLTP Isoform 1 of Phospholipid transfer protein precursor                                                                                         | QITNASLGRFR                       | g                        |
| IP100643034       | PLTP Isoform 1 of Phospholipid transfer protein precursor                                                                                         | NWSLPNR                           | g                        |
| IP100643034       | PLTP Isoform 1 of Phospholipid transfer protein precursor                                                                                         | TGLELSRDPAGR                      | g                        |
| IP100044369       | PLXDC2 Isoform 1 of Plexin domain-containing protein 2 precursor                                                                                  | VNLSDFPEYGFHLR                    | g                        |
| IP100552671       | PLXNA1 Plexin-A1 precursor                                                                                                                        | LSGNLTLR                          | f                        |
| IP100552671       | PLXNA1 Plexin-A1 precursor                                                                                                                        | VNVSDECPQLPSTQYVVGVPKPTLAAR       | f                        |
| IP100552671       | PLXNA1 Plexin-A1 precursor                                                                                                                        | VNYTEDPTLR                        | f                        |
| IP100165931       | PLXNA4 Isoform 1 of Plexin-A4 precursor                                                                                                           | SPSYVVCNTSDEVLEMK                 | f                        |
| IP100853369       | PLXNB2 Plexin-B2 precursor                                                                                                                        | ALNSLNR                           | f; g                     |
| IP100853369       | PLXNB2 Plexin-B2 precursor                                                                                                                        | VVFLSPAVPEEPAAYNLTVLIEMDGR        | f                        |
| IP100024766       | PLXNC1 Plexin-C1 precursor                                                                                                                        | ASNITMLK                          | f; g                     |
| IP100024766       | PLXNC1 Plexin-C1 precursor                                                                                                                        | GACEVRLGNLSR                      | f                        |
| IP100024766       | PLXNC1 Plexin-C1 precursor                                                                                                                        | SNVITGANFR                        | f                        |
| IP100024766       | PLXNC1 Plexin-C1 precursor                                                                                                                        | VILGENLTSNCFEVIYEIK               | f                        |
| IP100472139       | PLXND1 Isoform 2 of Plexin-D1 precursor; PLXND1 Isoform 1 of Plexin-D1 precursor                                                                  | ANFTYDCSR                         | f                        |
| IP100795696       | PMCA3a (Fragment)                                                                                                                                 | SGSVQAVR                          | h                        |
| IP100000477       | PNAS-139,ARP2 3 complex 34 kDa subunit                                                                                                            | NCFASVFEK                         | b                        |
| IP100000477       | PNAS-139,ARP2 3 complex 34 kDa subunit                                                                                                            | RNCFASVFEK                        | b                        |
| IP100024670       | Polyposis locus protein 1                                                                                                                         | NCMTDLAK                          | b                        |
| IP100798167       | PON1 32 kDa protein; PON1 Serum paraoxonase/arylesterase 1                                                                                        | VTQVYAENGTVLQSGTVASVYK            | g                        |
| IP100872795       | PPAP2A 42 kDa protein; PPAP2A 42 kDa protein; PPAP2A Isoform 2 of Lipid phosphate phosphohydrolase 1; PPAP2A Isoform 1 of Lipid phos              | INCSDGVEIYICR                     | f; g                     |
| IP100059135       | PPP1R14A Isoform 1 of Protein phosphatase 1 regulatory subunit 14A; PPP1R14A Isoform 2 of Protein phosphatase 1 regulatory subunit 14A            | QPSPHSDGLSPLQDR                   | h                        |
| IP100893539       | PPP1R7 Protein; PPP1R7 Isoform 1 of Protein phosphatase 1 regulatory subunit 7                                                                    | RVESESGDEEGKK                     | h                        |
| IP100514424       | PPT1 Palmitoyl-protein thioesterase 1                                                                                                             | GINESYK                           | f                        |
| IP100514424       | PPT1 Palmitoyl-protein thioesterase 1                                                                                                             | GINESYKK                          | f; g                     |
| IP100514424       | PPT1 Palmitoyl-protein thioesterase 1                                                                                                             | SIFLADINQER                       | f; g                     |
| IP100514424       | PPT1 Palmitoyl-protein thioesterase 1; PPT1 Palmitoyl-protein thioesterase 1 precursor                                                            | FLNDSIVDPVDESEWFGYR               | f; g                     |
| IP100514424       | PPT1 Palmitoyl-protein thioesterase 1; PPT1 Palmitoyl-protein thioesterase 1 precursor                                                            | NHSIFLADINQER                     | f; g                     |
| IP100455851       | PREDICTED: KIAA1688 protein                                                                                                                       | AALTGAK                           | a                        |
| IP100396483       | PREDICTED: similar to 14-3-3 protein zeta/delta                                                                                                   | AAFDEALAEIDLSEESYK                | d                        |
| IP100238575       | PREDICTED: similar to apical early                                                                                                                | AARISSPVISK                       | a                        |
| IP100402752       | PREDICTED: similar to HILV1821                                                                                                                    | AACGGGRGSGWTAPLGS                 | a                        |
| IP100184110       | Predicted: Similar to opioid binding protein/cell adhesion molecule precursor                                                                     | QGAGEYECVTHVNSAPDSR               | b                        |
| IP100736047       | PREDICTED: similar to phosphodiesterase 4D interacting protein isoform 2                                                                          | AAGGSGK                           | c                        |
| IP100235708       | PREDICTED: similar to RIKEN cDNA                                                                                                                  | AACANNVGLLR                       | a                        |
| IP100235708       | PREDICTED: similar to RIKEN cDNA                                                                                                                  | AACANNVGLRLTVRR                   | a                        |
| IP100455849       | PREDICTED: similar to RIKEN cDNA                                                                                                                  | AASQTPSVVFSR                      | a                        |



| IPi Accession No. | Protein Description                                                                                                                                                                                                | Peptide Sequence*                | Primary Source Dataset** |
|-------------------|--------------------------------------------------------------------------------------------------------------------------------------------------------------------------------------------------------------------|----------------------------------|--------------------------|
| IP10015786        | Predicted: Similar to RIKEN CDNA 1700007106                                                                                                                                                                        | YCLLSVR                          | b                        |
| IP100020987       | PRELP Proargin precursor                                                                                                                                                                                           | IHYLYLQNNFTELPEYFQNAITGLR        | f; g                     |
| IP100020987       | PRELP Proargin precursor                                                                                                                                                                                           | INGTQICPNLDVAFHDFSSDLENVPHLR     | f; g                     |
| IP100020987       | PRELP Proargin precursor                                                                                                                                                                                           | NSFNISNLLVHLSHNR                 | f; g                     |
| IP100219774       | PRKAR2A cAMP-dependent protein kinase type II-alpha regulatory subunit; PRKAR2A Uncharacterized protein                                                                                                            | VADAKGDESEDEDELEVYVPSR           | h                        |
| IP100219628       | PRKCB Isoform Beta-II of Protein kinase C beta type                                                                                                                                                                | HPPVLTPPDQEVIR                   | h                        |
| IP100797025       | PRNP Major prion protein; PRNP Major prion protein precursor                                                                                                                                                       | QHTVTITTKGNETFDVK                | f; g                     |
| IP100328343       | Probable ATP-dependent RNA helicase p47                                                                                                                                                                            | CIALAQLLVQNFPAIAHR               | b                        |
| IP100216691       | Profilin 1                                                                                                                                                                                                         | CYEMASHLR                        | b; c                     |
| IP100246058       | Programmed cell death 6-interacting protein                                                                                                                                                                        | CSDIVFAR                         | b                        |
| IP100246058       | Programmed cell death 6-interacting protein                                                                                                                                                                        | ECYQSHR                          | b                        |
| IP100017334       | Prohibitin                                                                                                                                                                                                         | AAELIANSLATAGDGLIELR             | d; e                     |
| IP100017334       | Prohibitin                                                                                                                                                                                                         | GVQDIVVGGTFHLPWVQKPIIFDCR        | b                        |
| IP100020557       | Prolow-density lipoprotein receptor-related protein 1                                                                                                                                                              | CVRTEK                           | b                        |
| IP100020557       | Prolow-density lipoprotein receptor-related protein 1                                                                                                                                                              | ELQGNCSR                         | b                        |
| IP100020557       | Prolow-density lipoprotein receptor-related protein 1                                                                                                                                                              | FVCPNRFRR                        | b                        |
| IP100020557       | Prolow-density lipoprotein receptor-related protein 1                                                                                                                                                              | LYWCDAR                          | b                        |
| IP100020557       | Prolow-density lipoprotein receptor-related protein 1                                                                                                                                                              | CNGVQCDMDGSDGPHCR                | f; g                     |
| IP100020557       | Prolow-density lipoprotein receptor-related protein 1                                                                                                                                                              | DNTTCYEFK                        | f                        |
| IP100020557       | Prolow-density lipoprotein receptor-related protein 1                                                                                                                                                              | FNSTEQVYVTR                      | f                        |
| IP100020557       | Prolow-density lipoprotein receptor-related protein 1                                                                                                                                                              | GVTHLNISGLK                      | f; g                     |
| IP100020557       | Prolow-density lipoprotein receptor-related protein 1                                                                                                                                                              | IETLLNGTDR                       | f                        |
| IP100020557       | Prolow-density lipoprotein receptor-related protein 1                                                                                                                                                              | LTSCTANASICGDEAR                 | f; g                     |
| IP100020557       | Prolow-density lipoprotein receptor-related protein 1                                                                                                                                                              | TVPDIDNVTVLDYDAR                 | f; g                     |
| IP100295988       | PROM2 Prominin-2                                                                                                                                                                                                   | VDYQSLDLSSAARR                   | f                        |
| IP100002280       | ProSAA5 precursor                                                                                                                                                                                                  | AADHDVGSLEPPEGVLG                | a                        |
| IP100394835       | Prostaglandin EP3 receptor subtype isoform, Splice isoform EP3-1 of P43115 Prostaglandin E2 receptor, EP3 subtype, Splice isoform EP3D of P43115                                                                   | ALVSRRCR                         | b                        |
| IP100394835       | Prostaglandin EP3 receptor subtype isoform, Splice isoform EP3-1 of P43115 Prostaglandin E2 receptor, EP3 subtype, Splice isoform EP3D of P43115                                                                   | SFLLCIGWALTDLVGQLL               | b                        |
| IP100016848       | Protein C20orf103 precursor                                                                                                                                                                                        | CGHSQSELQVFWDR                   | b                        |
| IP100016848       | Protein C20orf103 precursor                                                                                                                                                                                        | CPYDER                           | b                        |
| IP100306413       | Protein CGI-38, brain specific protein                                                                                                                                                                             | SKEEAFDAICQLVAGK                 | b                        |
| IP100294894       | Protein CGI-51                                                                                                                                                                                                     | TKDDHICIGEDVFK                   | b                        |
| IP100010796       | Protein disulfide isomerase precursor                                                                                                                                                                              | ITFECHR                          | b                        |
| IP100010796       | Protein disulfide isomerase precursor                                                                                                                                                                              | KEECPAVR                         | b                        |
| IP100289862       | Protein KIAA0193                                                                                                                                                                                                   | TQSPCFGDDDDPAKKEPR               | b                        |
| IP100011515       | Protein kinase C and casein kinase substrate in neurons protein 1                                                                                                                                                  | AYHLACK                          | b                        |
| IP100011515       | Protein kinase C and casein kinase substrate in neurons protein 1                                                                                                                                                  | CKQDVQK                          | b                        |
| IP100011515       | Protein kinase C and casein kinase substrate in neurons protein 1                                                                                                                                                  | KAYHLACK                         | b                        |
| IP100013393       | Protein kinase C, alpha type                                                                                                                                                                                       | IADFGMCK                         | b                        |
| IP100013393       | Protein kinase C, alpha type                                                                                                                                                                                       | LGGCGEGER                        | b                        |
| IP100013393       | Protein kinase C, alpha type                                                                                                                                                                                       | RLGGGPEGER                       | b                        |
| IP100013393       | Protein kinase C, alpha type                                                                                                                                                                                       | VLALLDKPPFLTQLHSCFQTVDR          | b                        |
| IP100007128       | Protein kinase C, gamma type                                                                                                                                                                                       | CFFGASGGR                        | b                        |
| IP100007128       | Protein kinase C, gamma type                                                                                                                                                                                       | CHEFVTECPGAGK                    | b                        |
| IP100007128       | Protein kinase C, gamma type                                                                                                                                                                                       | RCHEFVTECPGAGK                   | b                        |
| IP100219593       | Protein kinase, camp-dependent, regulatory, type II, beta                                                                                                                                                          | CLAMDVQAFER                      | b                        |
| IP100219593       | Protein kinase, camp-dependent, regulatory, type II, beta                                                                                                                                                          | CVGNVDNR                         | b                        |
| IP100294187       | Protein-arginine deiminase type II                                                                                                                                                                                 | CIDWNR                           | b                        |
| IP100294187       | Protein-arginine deiminase type II                                                                                                                                                                                 | DLGIPKPGQVVEECCLEMHVR            | b                        |
| IP100294187       | Protein-arginine deiminase type II                                                                                                                                                                                 | FLGEVHCNTYR                      | b                        |
| IP100294187       | Protein-arginine deiminase type II                                                                                                                                                                                 | GLLEPLGLECFIDDISAYHK             | b                        |
| IP100294187       | Protein-arginine deiminase type II                                                                                                                                                                                 | YCFQVLYR                         | b                        |
| IP100718906       | PRRT2 Isoform 1 of Proline-rich transmembrane protein 2; PRRT2 Isoform 3 of Proline-rich transmembrane protein 2; PRRT2 Isoform 2 of Proline-rich transmembrane protein 2                                          | AGLAPETETPAGASETAQATDLISLSPGGESK | d; h                     |
| IP100328520       | PRRT2 Isoform 2 of Proline-rich transmembrane protein 2                                                                                                                                                            | AHSGHPGSPR                       | h                        |
| IP100328520       | PRRT2 Isoform 2 of Proline-rich transmembrane protein 2                                                                                                                                                            | ANCSPEPQCVETSKPEVSK              | h                        |
| IP100873201       | PSAP Isoform Sap-mu-6 of Proactivator polypeptide precursor; PSAP Prosaposin variant; PSAP Isoform Sap-mu-9 of Proactivator polypeptide precursor                                                                  | NLEKNSTQKELIAALEK                | f; g                     |
| IP100873201       | PSAP Isoform Sap-mu-6 of Proactivator polypeptide precursor; PSAP Prosaposin variant; PSAP Isoform Sap-mu-9 of Proactivator polypeptide precursor                                                                  | NSTKQELIAALEK                    | f; g                     |
| IP101013100       | PSD3 Uncharacterized protein; PSD3 Isoform 2 of PH and SEC7 domain-containing protein 3; PSD3 Isoform 1 of PH and SEC7 domain-containing protein 3                                                                 | SHSSLSLNPDTSPITAK                | b                        |
| IP100513767       | PTGDS Prostaglandin D2 synthase 21kDa                                                                                                                                                                              | GLNLSTFLR                        | g                        |
| IP100513767       | PTGDS Prostaglandin D2 synthase 21kDa                                                                                                                                                                              | WFSAGLASNSS                      | g                        |
| IP100513767       | PTGDS Prostaglandin D2 synthase 21kDa                                                                                                                                                                              | WFSAGLASNSSW                     | g                        |
| IP100513767       | PTGDS Prostaglandin D2 synthase 21kDa                                                                                                                                                                              | WFSAGLASNSSWLR                   | a; f; g                  |
| IP100514285       | PTGDS Prostaglandin D2 synthase 21kDa; PTGDS Prostaglandin D2 synthase 21kDa                                                                                                                                       | AALSMDCK                         | a; f; g                  |
| IP100514285       | PTGDS Prostaglandin D2 synthase 21kDa; PTGDS Prostaglandin-H2 D-isomerase precursor                                                                                                                                | GGNLNSTFLR                       | g                        |
| IP100514285       | PTGDS Prostaglandin D2 synthase 21kDa; PTGDS Prostaglandin-H2 D-isomerase precursor                                                                                                                                | PATDGGNLNSTFLR                   | g                        |
| IP100514285       | PTGDS Prostaglandin D2 synthase 21kDa; PTGDS Prostaglandin-H2 D-isomerase precursor                                                                                                                                | SVVAPATDGGNL                     | g                        |
| IP100514285       | PTGDS Prostaglandin D2 synthase 21kDa; PTGDS Prostaglandin-H2 D-isomerase precursor                                                                                                                                | TDGGLNSTFLR                      | g                        |
| IP100514285       | PTGDS Prostaglandin D2 synthase 21kDa; PTGDS Prostaglandin-H2 D-isomerase precursor                                                                                                                                | WFSAGLAS                         | a                        |
| IP100514285       | PTGDS Prostaglandin D2 synthase 21kDa; PTGDS Prostaglandin-H2 D-isomerase precursor                                                                                                                                | APEAVSQVQPNFQDQK                 | a                        |
| IP100013179       | PTGDS Prostaglandin-H2 D-isomerase precursor                                                                                                                                                                       | AGLASNSSWLR                      | g                        |
| IP100013179       | PTGDS Prostaglandin-H2 D-isomerase precursor                                                                                                                                                                       | APATDGGNLNSTFLR                  | g                        |
| IP100013179       | PTGDS Prostaglandin-H2 D-isomerase precursor                                                                                                                                                                       | ATDGGNLNSTFLR                    | g                        |
| IP100013179       | PTGDS Prostaglandin-H2 D-isomerase precursor                                                                                                                                                                       | DGGLNSTFLR                       | f                        |
| IP100013179       | PTGDS Prostaglandin-H2 D-isomerase precursor                                                                                                                                                                       | FSAGLASNSSWLR                    | g                        |
| IP100013179       | PTGDS Prostaglandin-H2 D-isomerase precursor                                                                                                                                                                       | GLASNSSWLR                       | f; g                     |
| IP100013179       | PTGDS Prostaglandin-H2 D-isomerase precursor                                                                                                                                                                       | GRWFSAGLASNSSWLR                 | g                        |
| IP100013179       | PTGDS Prostaglandin-H2 D-isomerase precursor                                                                                                                                                                       | LNLTSTFLR                        | g                        |
| IP100013179       | PTGDS Prostaglandin-H2 D-isomerase precursor                                                                                                                                                                       | PAGSLGSY                         | d                        |
| IP100013179       | PTGDS Prostaglandin-H2 D-isomerase precursor                                                                                                                                                                       | PAGSLGSYSYR                      | g                        |
| IP100013179       | PTGDS Prostaglandin-H2 D-isomerase precursor                                                                                                                                                                       | RWFSAGLASNSSWLR                  | g                        |
| IP100013179       | PTGDS Prostaglandin-H2 D-isomerase precursor                                                                                                                                                                       | SAGLASNSSWLR                     | f; g                     |
| IP100013179       | PTGDS Prostaglandin-H2 D-isomerase precursor                                                                                                                                                                       | SVSVVETDQVALLYSQSK               | g                        |
| IP100013179       | PTGDS Prostaglandin-H2 D-isomerase precursor                                                                                                                                                                       | SVVAPATDGGNLNST                  | f                        |
| IP100013179       | PTGDS Prostaglandin-H2 D-isomerase precursor                                                                                                                                                                       | SVVAPATDGGNLNSTIF                | g                        |
| IP100013179       | PTGDS Prostaglandin-H2 D-isomerase precursor                                                                                                                                                                       | SVVAPATDGGNLNSTFLR               | f; g                     |
| IP100013179       | PTGDS Prostaglandin-H2 D-isomerase precursor                                                                                                                                                                       | SVVAPATDGGNLNSTFLRK              | g                        |
| IP100013179       | PTGDS Prostaglandin-H2 D-isomerase precursor                                                                                                                                                                       | VAPATDGGNLNSTFLR                 | f                        |
| IP100013179       | PTGDS Prostaglandin-H2 D-isomerase precursor                                                                                                                                                                       | VVAPATDGGNLNSTFLR                | g                        |
| IP100013179       | PTGDS Prostaglandin-H2 D-isomerase precursor                                                                                                                                                                       | WFSAGLASNSSWLR                   | g                        |
| IP100013179       | PTGDS Prostaglandin-H2 D-isomerase precursor                                                                                                                                                                       | KSVVAPATDGGNLNSTFLR              | g                        |
| IP100871938       | PTGFRN 103 kDa protein; PTGFRN Prostaglandin F2 receptor negative regulator precursor                                                                                                                              | LENWTDASR                        | f; g                     |
| IP100844079       | PTPRC Isoform 1 of Leukocyte common antigen precursor; PTPRC protein tyrosine phosphatase, receptor type, C isoform 3 precursor; PTPRC protein tyrosine phosphatase, receptor type, C isoform 3 precursor          | YANITVDYLYNK                     | f; g                     |
| IP100871253       | PTPRK Mutant receptor type protein tyrosine phosphatase K; PTPRK Isoform 2 of Receptor-type tyrosine-protein phosphatase kappa precursor; PTPRK protein tyrosine phosphatase, receptor type, K isoform 2 precursor | IADVDESGLYNITR                   | f; g                     |
| IP100004440       | PTPRN Receptor-type tyrosine-protein phosphatase-like N precursor                                                                                                                                                  | HNEQNLSLADVTQAGLVK               | f                        |
| IP100332273       | PTPRS Isoform PTFS-MEC of Receptor-type tyrosine-protein phosphatase S precursor; PTPRS Isoform PTFS of Receptor-type tyrosine-protein phosphatase S precursor                                                     | KVEALNATAIR                      | f                        |
| IP100871792       | PTPRZ1 265 kDa protein                                                                                                                                                                                             | TVEINLTNDYR                      | f; g                     |
| IP100871792       | PTPRZ1 265 kDa protein; PTPRZ1 protein tyrosine phosphatase, receptor-type, zeta 1 precursor                                                                                                                       | ESFLQNTYIEIR                     | f                        |

| IPI Accession No. | Protein Description                                                                                                                                           | Peptide Sequence*            | Primary Source Dataset** |
|-------------------|---------------------------------------------------------------------------------------------------------------------------------------------------------------|------------------------------|--------------------------|
| IP100306301       | Pyruvate dehydrogenase E1 component alpha subunit, somatic form, mitochondrial precursor                                                                      | AAASTDYK                     | d; e                     |
| IP100306301       | Pyruvate dehydrogenase E1 component alpha subunit, somatic form, mitochondrial precursor                                                                      | FAAAVCR                      | b                        |
| IP100306301       | Pyruvate dehydrogenase E1 component alpha subunit, somatic form, mitochondrial precursor                                                                      | KCDLHR                       | b                        |
| IP100306301       | Pyruvate dehydrogenase E1 component alpha subunit, somatic form, mitochondrial precursor                                                                      | KGCGAK                       | b                        |
| IP10003925        | Pyruvate dehydrogenase E1 component beta subunit, mitochondrial precursor                                                                                     | PVGHCEAAAVLSK                | b                        |
| IP10003925        | Pyruvate dehydrogenase E1 component beta subunit, mitochondrial precursor                                                                                     | SRPVGHCLEAAVLSK              | b                        |
| IP100298423       | Pyruvate dehydrogenase protein X component, mitochondrial precursor                                                                                           | STVPHAVATADCDLGAVLK          | b                        |
| IP100220644       | pyruvate kinase 3 isoform 2                                                                                                                                   | CLAAALVLTESGR                | b                        |
| IP100220644       | pyruvate kinase 3 isoform 2                                                                                                                                   | GSVEASYKCLAAALVLTESGR        | b                        |
| IP100328347       | Pyruvate kinase, M2 isozyme                                                                                                                                   | AAMADTFLEHMCR                | b                        |
| IP100328347       | Pyruvate kinase, M2 isozyme                                                                                                                                   | CDENILWLDYK                  | b; d                     |
| IP100328347       | Pyruvate kinase, M2 isozyme                                                                                                                                   | GIFPVLCK                     | b; e; d; e               |
| IP100328347       | Pyruvate kinase, M2 isozyme                                                                                                                                   | HAAMADTFLEHMCR               | b                        |
| IP10003919        | QPCT Glutaminyl-peptide cyclotransferase precursor                                                                                                            | SFSNISTLNPTAKR               | f; g                     |
| IP10003919        | QPCT Glutaminyl-peptide cyclotransferase precursor                                                                                                            | YFQNSVYGGVQDDHIIFLR          | f; g                     |
| IP10003590        | Quiescin                                                                                                                                                      | AAPGQPEPHEMELQR              | a                        |
| IP100010154       | Rab GDP dissociation inhibitor alpha                                                                                                                          | KSDIYVCMISYAHNVAQGK          | b                        |
| IP100010154       | Rab GDP dissociation inhibitor alpha                                                                                                                          | SDIYVCMISYAHNVAQGK           | b                        |
| IP100031461       | Rab GDP dissociation inhibitor beta                                                                                                                           | KSDIYVCMISFAHNVAQGK          | b                        |
| IP100031461       | Rab GDP dissociation inhibitor beta                                                                                                                           | TYDATTHFFETCDDIK             | b                        |
| IP100152542       | Rabconnectin                                                                                                                                                  | HGNIQVSCVCSNQGR              | b                        |
| IP100328832       | Rabconnectin-3 beta,TGF-beta resistance-associated protein TRAG                                                                                               | VTCLLYPHIQVSAR               | b                        |
| IP100017367       | Radixin,moesin                                                                                                                                                | HLALCMGNHLYMR                | b                        |
| IP100221325       | Ran-binding protein 2                                                                                                                                         | LPPTFFCGVSDTDEDNGEDFQSELQK   | b                        |
| IP100026144       | Rap1 GTPase-activating protein 1                                                                                                                              | TYHDVIPISCLTEFPNVQMAK        | b                        |
| IP100016513       | Ras-related protein Rab-10                                                                                                                                    | CDMDDKR                      | b                        |
| IP100016513       | Ras-related protein Rab-10                                                                                                                                    | TCVLFER                      | b                        |
| IP100291928       | Ras-related protein Rab-14                                                                                                                                    | SCLLHQFTEK                   | b                        |
| IP100007755       | Ras-related protein Rab-21                                                                                                                                    | GIEELFLDLCK                  | b                        |
| IP100300096       | Ras-related protein Rab-35                                                                                                                                    | ENVNVEEMFNCTELVLR            | b                        |
| IP100300096       | Ras-related protein Rab-35                                                                                                                                    | WLHEINQNCDDVCR               | b                        |
| IP100061114       | Ras-related protein Rab-3C,Ras-related protein Rab-3A                                                                                                         | CDMEDER                      | b                        |
| IP100016342       | Ras-related protein Rab-7                                                                                                                                     | AQAWCYSK                     | b                        |
| IP10015148        | Ras-related protein Rap-1b,Ras-related protein Rab-3D,Ras-related protein Rap-1A,PNAS-140                                                                     | CDLEDER                      | b                        |
| IP100300384       | Receptor protein-tyrosine kinase erbB-2 precursor                                                                                                             | VCYGLGMEHLR                  | b                        |
| IP100241562       | RELN reelin isoform a                                                                                                                                         | APSNVSTIHILYLPEDAK           | g                        |
| IP100472086       | REV3-like, catalytic subunit of DNA                                                                                                                           | AAALSIDLCK                   | a                        |
| IP100374563       | REVERSED AGRN Agrin                                                                                                                                           | TNVPVTSR                     | h                        |
| IP100017342       | Rho-related GTP-binding protein RhoG                                                                                                                          | WHPEVCHICPDVPILLVGTK         | b                        |
| IP10005038        | Ribonuclease UK114                                                                                                                                            | AAGCDFTNVVK                  | c                        |
| IP100376867       | RNA polymerase II transcription factor SIII                                                                                                                   | AAGSTLHAVEK                  | a                        |
| IP100298547       | RNA-binding protein regulatory subunit                                                                                                                        | RGLIAIACAGTALLAHEIGFGSK      | b                        |
| IP100879883       | RNF13 15 kDa protein; RNF13 RING finger protein 13                                                                                                            | DILAYNFENASQTFDDLPAR         | f; g                     |
| IP100879883       | RNF13 15 kDa protein; RNF13 RING finger protein 13                                                                                                            | DNSSGTFIVLIR                 | f; g                     |
| IP100402657       | RPAP1 Isoform 1 of RNA polymerase II-associated protein 1                                                                                                     | TWLLADEGLR                   | g                        |
| IP100021766       | RTN4 Isoform 1 of Reticulon-4                                                                                                                                 | GSSGSVDTELFALPAASEPVIR       | d; h                     |
| IP100021766       | RTN4 Isoform 1 of Reticulon-4                                                                                                                                 | MEDLDQSLVSSSDSPRPQPAFK       | h                        |
| IP100010157       | S-adenosylmethionine synthetase gamma form                                                                                                                    | ICDQSDDAVLDAHLQQDDPAK        | b                        |
| IP100217766       | SCARB2 Lysosome membrane protein 2                                                                                                                            | YFNVNTPEEILR                 | f; g                     |
| IP100009362       | SCG2 Secretogranin-2                                                                                                                                          | YPGQSSDELDQEEQIEQAIK         | h                        |
| IP100292071       | SCG3 Secretogranin-3 precursor                                                                                                                                | NKLEKNATDNISK                | g                        |
| IP100395428       | SCN1B sodium channel, voltage-gated, type I, beta isoform b                                                                                                   | LLFFENYEHNTSVVK              | f; g                     |
| IP100020747       | SCN3B Sodium channel subunit beta-3 precursor                                                                                                                 | LQWNGSK                      | f                        |
| IP100514804       | SCN4B Isoform 2 of Sodium channel subunit beta-4 precursor; SCN4B Isoform 1 of Sodium channel subunit beta-4 precursor                                        | MNNISIVLR                    | f; g                     |
| IP100514804       | SCN4B Isoform 2 of Sodium channel subunit beta-4 precursor; SCN4B Isoform 1 of Sodium channel subunit beta-4 precursor                                        | WTYNSSDAFK                   | f; g                     |
| IP100066061       | Secretogranin 1 precursor (Sg1) (Chromogranin B) (CgB) [Contains: GAWK peptide; CCB peptide]                                                                  | CHEVLSNLSK                   | b                        |
| IP100002790       | SEL1L Isoform 1 of Protein sel-1 homolog 1 precursor                                                                                                          | MYSEGDIVFQSNETALHYFK         | f; g                     |
| IP100305719       | Selenium binding protein 1                                                                                                                                    | FLHNPDAAGVFGCALSSITQR        | b                        |
| IP100513964       | SEMA4B Isoform 2 of Semaphorin-4B precursor                                                                                                                   | FEAEHISNTALLISR              | f                        |
| IP100023807       | SEMA4D Semaphorin-4D precursor                                                                                                                                | EAVFAVNALNISEK               | f                        |
| IP100023807       | SEMA4D Semaphorin-4D precursor                                                                                                                                | KDYNVYQIVYDR                 | f                        |
| IP100025257       | SEMA7A Semaphorin-7A precursor                                                                                                                                | ENDPKNPEAPLNVSR              | f; g                     |
| IP100894340       | SEPT2 Uncharacterized protein; SEPT2 Isoform 2 of Septin-2; SEPT2 Isoform 1 of Septin-2                                                                       | IYHLPAESEDDEDFKQTR           | h                        |
| IP100033025       | Septin 7                                                                                                                                                      | ADTLPEECQFFK                 | b                        |
| IP100033025       | Septin 7                                                                                                                                                      | VQCCLYFIAPSGHGKLPKLDIEFMK    | b                        |
| IP100333841       | Septin KIAA0202d.                                                                                                                                             | IHVCLYFITPIGH                | b                        |
| IP100333841       | Septin KIAA0202d.                                                                                                                                             | STLMNLTNFTTEEAASHHEACVR      | b                        |
| IP100383573       | Septin,Septin 5,IP100396155.1 ENSEMBL:ENSP00000328190                                                                                                         | ADCLVPSEIKR                  | b                        |
| IP100383573       | Septin,Septin 5,IP100396155.1 ENSEMBL:ENSP00000328190                                                                                                         | AHCQMQMISK                   | b                        |
| IP100383573       | Septin,Septin 5,IP100396155.1 ENSEMBL:ENSP00000328190                                                                                                         | DVTCDVHYENYR                 | b                        |
| IP100019376       | Septin-11                                                                                                                                                     | AAAQLLQSQQAQSQGAQTK          | d; e                     |
| IP100008380       | Serine/threonine protein phosphatase 2A, catalytic subunit, alpha isoform,Serine/threonine protein phosphatase 2A, catalytic subunit, beta isoform            | CPVTVCGDVHGFQFDLMELFR        | b                        |
| IP100179415       | Serine/threonine protein phosphatase 2B catalytic subunit, alpha isoform                                                                                      | GNHECR                       | b                        |
| IP100179415       | Serine/threonine protein phosphatase 2B catalytic subunit, alpha isoform                                                                                      | NLLDIDAPVTVCGDIHQFFDLMK      | b                        |
| IP100019812       | Serine/threonine protein phosphatase 5                                                                                                                        | TECAEPPRDEPPDALKR            | b                        |
| IP100218236       | Serine/threonine protein phosphatase PPI-beta catalytic subunit                                                                                               | ICGDHGYQTDLLR                | b                        |
| IP100218236       | Serine/threonine protein phosphatase PPI-beta catalytic subunit                                                                                               | IYGFYDECK                    | b                        |
| IP100022463       | Serotransferrin precursor                                                                                                                                     | ASVLDCLR                     | b                        |
| IP100022463       | Serotransferrin precursor                                                                                                                                     | KDSSLCK                      | b                        |
| IP100553177       | SERPINA1 Isoform 1 of Alpha-1-antitrypsin precursor                                                                                                           | AMLSLGTK                     | g                        |
| IP100553177       | SERPINA1 Isoform 1 of Alpha-1-antitrypsin precursor                                                                                                           | ATAIFFLPDEGK                 | g                        |
| IP100553177       | SERPINA1 Isoform 1 of Alpha-1-antitrypsin precursor                                                                                                           | IFFLPDEGK                    | g                        |
| IP100553177       | SERPINA1 Isoform 1 of Alpha-1-antitrypsin precursor                                                                                                           | IHEGFQELLR                   | g                        |
| IP100553177       | SERPINA1 Isoform 1 of Alpha-1-antitrypsin precursor                                                                                                           | NATAIFFLPDEGK                | g                        |
| IP100553177       | SERPINA1 Isoform 1 of Alpha-1-antitrypsin precursor                                                                                                           | QHIEGFQELLR                  | g                        |
| IP100553177       | SERPINA1 Isoform 1 of Alpha-1-antitrypsin precursor                                                                                                           | QLAHQSNSTNIF                 | g                        |
| IP100553177       | SERPINA1 Isoform 1 of Alpha-1-antitrypsin precursor                                                                                                           | TAIFFLPDEGK                  | f                        |
| IP100553177       | SERPINA1 Isoform 1 of Alpha-1-antitrypsin precursor                                                                                                           | YLGNAI                       | f                        |
| IP100553177       | SERPINA1 Isoform 1 of Alpha-1-antitrypsin precursor                                                                                                           | GTQGVLDVVK                   | f                        |
| IP100553177       | SERPINA1 Isoform 1 of Alpha-1-antitrypsin precursor                                                                                                           | LQHLLENLTHDITK               | f                        |
| IP100553177       | SERPINA1 Isoform 1 of Alpha-1-antitrypsin precursor                                                                                                           | SVLQGLGITK                   | f                        |
| IP100869004       | SERPINA1 Isoform 3 of Alpha-1-antitrypsin precursor; SERPINA1 Isoform 2 of Alpha-1-antitrypsin precursor; SERPINA1 Isoform 1 of Alpha-1-antitrypsin precursor | ADTHDELEGL                   | g                        |
| IP100869004       | SERPINA1 Isoform 3 of Alpha-1-antitrypsin precursor; SERPINA1 Isoform 2 of Alpha-1-antitrypsin precursor; SERPINA1 Isoform 1 of Alpha-1-antitrypsin precursor | ADTHDELEGLN                  | g                        |
| IP100869004       | SERPINA1 Isoform 3 of Alpha-1-antitrypsin precursor; SERPINA1 Isoform 2 of Alpha-1-antitrypsin precursor; SERPINA1 Isoform 1 of Alpha-1-antitrypsin precursor | ADTHDELEGLNFLT               | e                        |
| IP100869004       | SERPINA1 Isoform 3 of Alpha-1-antitrypsin precursor; SERPINA1 Isoform 2 of Alpha-1-antitrypsin precursor; SERPINA1 Isoform 1 of Alpha-1-antitrypsin precursor | ADTHDELEGLNFLTPEAQIHEGFQELLR | f; g                     |
| IP100869004       | SERPINA1 Isoform 3 of Alpha-1-antitrypsin precursor; SERPINA1 Isoform 2 of Alpha-1-antitrypsin precursor; SERPINA1 Isoform 1 of Alpha-1-antitrypsin precursor | DEILEGLNFLTPEAQIHEGFQELLR    | g                        |
| IP100869004       | SERPINA1 Isoform 3 of Alpha-1-antitrypsin precursor; SERPINA1 Isoform 2 of Alpha-1-antitrypsin precursor; SERPINA1 Isoform 1 of Alpha-1-antitrypsin precursor | EAHQIHEGFQELLR               | a                        |



| UPI Accession No. | Protein Description                                                                                                                                                    | Peptide Sequence*              | Primary Source Dataset** |
|-------------------|------------------------------------------------------------------------------------------------------------------------------------------------------------------------|--------------------------------|--------------------------|
| IP00869004        | SERPINA1 Isoform 3 of Alpha-1-antitrypsin precursor; SERPINA1 Isoform 2 of Alpha-1-antitrypsin precursor; SERPINA1 Isoform 1 of Alpha-1-antitrypsin precursor          | EGFQELLR                       | g                        |
| IP00869004        | SERPINA1 Isoform 3 of Alpha-1-antitrypsin precursor; SERPINA1 Isoform 2 of Alpha-1-antitrypsin precursor; SERPINA1 Isoform 1 of Alpha-1-antitrypsin precursor          | FFLPDEGK                       | f; g                     |
| IP00869004        | SERPINA1 Isoform 3 of Alpha-1-antitrypsin precursor; SERPINA1 Isoform 2 of Alpha-1-antitrypsin precursor; SERPINA1 Isoform 1 of Alpha-1-antitrypsin precursor          | FNLTEIPEAQIHGFQELLR            | f; g                     |
| IP00869004        | SERPINA1 Isoform 3 of Alpha-1-antitrypsin precursor; SERPINA1 Isoform 2 of Alpha-1-antitrypsin precursor; SERPINA1 Isoform 1 of Alpha-1-antitrypsin precursor          | GNATAIFFLPDEGK                 | f; g                     |
| IP00869004        | SERPINA1 Isoform 3 of Alpha-1-antitrypsin precursor; SERPINA1 Isoform 2 of Alpha-1-antitrypsin precursor; SERPINA1 Isoform 1 of Alpha-1-antitrypsin precursor          | HEGFQELLR                      | f; g                     |
| IP00869004        | SERPINA1 Isoform 3 of Alpha-1-antitrypsin precursor; SERPINA1 Isoform 2 of Alpha-1-antitrypsin precursor; SERPINA1 Isoform 1 of Alpha-1-antitrypsin precursor          | LGNTAIAFFLPDEGK                | g                        |
| IP00869004        | SERPINA1 Isoform 3 of Alpha-1-antitrypsin precursor; SERPINA1 Isoform 2 of Alpha-1-antitrypsin precursor; SERPINA1 Isoform 1 of Alpha-1-antitrypsin precursor          | QLAHQSNSTNIFFSPVSIATAF         | f; g                     |
| IP00869004        | SERPINA1 Isoform 3 of Alpha-1-antitrypsin precursor; SERPINA1 Isoform 2 of Alpha-1-antitrypsin precursor; SERPINA1 Isoform 1 of Alpha-1-antitrypsin precursor          | QLAHQSNSTNIFFSPVSIATAFAM       | f; g                     |
| IP00869004        | SERPINA1 Isoform 3 of Alpha-1-antitrypsin precursor; SERPINA1 Isoform 2 of Alpha-1-antitrypsin precursor; SERPINA1 Isoform 1 of Alpha-1-antitrypsin precursor          | QLAHQSNSTNIFFSPVSIATAFAMSLGTK  | f; g                     |
| IP00869004        | SERPINA1 Isoform 3 of Alpha-1-antitrypsin precursor; SERPINA1 Isoform 2 of Alpha-1-antitrypsin precursor; SERPINA1 Isoform 1 of Alpha-1-antitrypsin precursor          | THDEILEGLNFNLTPEIPEAQIHGFQELLR | g                        |
| IP00869004        | SERPINA1 Isoform 3 of Alpha-1-antitrypsin precursor; SERPINA1 Isoform 2 of Alpha-1-antitrypsin precursor; SERPINA1 Isoform 1 of Alpha-1-antitrypsin precursor          | TLNQPSDQLQTITGNGLFLSEGLK       | g                        |
| IP00869004        | SERPINA1 Isoform 3 of Alpha-1-antitrypsin precursor; SERPINA1 Isoform 2 of Alpha-1-antitrypsin precursor; SERPINA1 Isoform 1 of Alpha-1-antitrypsin precursor          | YLGNAATAIF                     | f; g                     |
| IP00869004        | SERPINA1 Isoform 3 of Alpha-1-antitrypsin precursor; SERPINA1 Isoform 2 of Alpha-1-antitrypsin precursor; SERPINA1 Isoform 1 of Alpha-1-antitrypsin precursor          | YLGNAATAIFFLPDEGK              | f; g                     |
| IP00869004        | SERPINA1 Isoform 3 of Alpha-1-antitrypsin precursor; SERPINA1 Isoform 2 of Alpha-1-antitrypsin precursor; SERPINA1 Isoform 1 of Alpha-1-antitrypsin precursor          | DSQQLTITGNGLFLSEGLK            | f; g                     |
| IP00869004        | SERPINA1 Isoform 3 of Alpha-1-antitrypsin precursor; SERPINA1 Isoform 2 of Alpha-1-antitrypsin precursor; SERPINA1 Isoform 1 of Alpha-1-antitrypsin precursor          | ITPNLAIEFAFSLYR                | f; g                     |
| IP00869004        | SERPINA1 Isoform 3 of Alpha-1-antitrypsin precursor; SERPINA1 Isoform 2 of Alpha-1-antitrypsin precursor; SERPINA1 Isoform 1 of Alpha-1-antitrypsin precursor          | QLAHQSNSTNIFFSPV               | f; g                     |
| IP00869004        | SERPINA1 Isoform 3 of Alpha-1-antitrypsin precursor; SERPINA1 Isoform 2 of Alpha-1-antitrypsin precursor; SERPINA1 Isoform 1 of Alpha-1-antitrypsin precursor          | QLAHQSNSTNIFFSPVSIATAFA        | f; g                     |
| IP00869004        | SERPINA1 Isoform 3 of Alpha-1-antitrypsin precursor; SERPINA1 Isoform 2 of Alpha-1-antitrypsin precursor; SERPINA1 Isoform 1 of Alpha-1-antitrypsin precursor          | QLAHQSNSTNIFFSPVSIATAFAML      | f; g                     |
| IP00550991        | SERPINA3 Alpha-1-antichymotrypsin precursor                                                                                                                            | FNLTEIPEAQIHGFQELLR            | f; g                     |
| IP00550991        | SERPINA3 Alpha-1-antichymotrypsin precursor                                                                                                                            | NLTIETSEAEIHQSFOHLLR           | g                        |
| IP00550991        | SERPINA3 Alpha-1-antichymotrypsin precursor                                                                                                                            | TLNQSSDELQSLMGN                | g                        |
| IP00550991        | SERPINA3 Alpha-1-antichymotrypsin precursor                                                                                                                            | TLNQSSDELQSLMGNAFVK            | f; g                     |
| IP00550991        | SERPINA3 Alpha-1-antichymotrypsin precursor                                                                                                                            | TLTEILK                        | g                        |
| IP00550991        | SERPINA3 Alpha-1-antichymotrypsin precursor                                                                                                                            | YTGNASALFILPDQDKMEVEAMLPELTK   | g                        |
| IP00847635        | SERPINA3 Isoform 1 of Alpha-1-antichymotrypsin precursor; SERPINA3 Alpha-1-antichymotrypsin precursor                                                                  | GLGFNLTIETSEAEIHQSFOHLLR       | f; g                     |
| IP00847635        | SERPINA3 Isoform 1 of Alpha-1-antichymotrypsin precursor; SERPINA3 Alpha-1-antichymotrypsin precursor                                                                  | LSLGAHNITLTELK                 | f; g                     |
| IP00847635        | SERPINA3 Isoform 1 of Alpha-1-antichymotrypsin precursor; SERPINA3 Alpha-1-antichymotrypsin precursor                                                                  | SLGHAHNITLTELK                 | g                        |
| IP00847635        | SERPINA3 Isoform 1 of Alpha-1-antichymotrypsin precursor; SERPINA3 Alpha-1-antichymotrypsin precursor                                                                  | YTGNASALFILPDQDK               | f; g                     |
| IP00328609        | SERPINA4 Kallistatin precursor                                                                                                                                         | GFNLTEISESDVHR                 | g                        |
| IP00328609        | SERPINA4 Kallistatin precursor                                                                                                                                         | FLNDTMAVVEAK                   | g                        |
| IP0007221         | SERPINA5 Plasma serine protease inhibitor precursor                                                                                                                    | QGNTALFILPSEGK                 | g                        |
| IP00027482        | SERPINA6 Corticosteroid-binding globulin precursor                                                                                                                     | AQLLQGLGFNLTER                 | g                        |
| IP00027482        | SERPINA6 Corticosteroid-binding globulin precursor                                                                                                                     | AVLQLEEGVDPTAGSTGTNLTKPHLR     | g                        |
| IP00027482        | SERPINA6 Corticosteroid-binding globulin precursor                                                                                                                     | YTIISGVDLGDVLEEMGIADLFQNFANFSR | f; g                     |
| IP00032179        | SERPINC1 Antithrombin III variant                                                                                                                                      | LGACNDLTLQMLEVFK               | f; g                     |
| IP00032179        | SERPINC1 Antithrombin III variant                                                                                                                                      | FATTFVQHLADSK                  | f; g                     |
| IP00032179        | SERPINC1 Antithrombin III variant                                                                                                                                      | TSQIHFFFAK                     | f; g                     |
| IP00032179        | SERPINC1 Antithrombin III variant                                                                                                                                      | SLTFNITYQDISLEVYGA             | f; g                     |
| IP00292950        | SERPIND1 Serpin peptidase inhibitor, clade D (Heparin cofactor), member 1                                                                                              | DFVNASSK                       | g                        |
| IP00292950        | SERPIND1 Serpin peptidase inhibitor, clade D (Heparin cofactor), member 1                                                                                              | NFGYTLR                        | g                        |
| IP00009890        | SERPINE2 Glia-derived nexin precursor                                                                                                                                  | NASELEVPEYTR                   | g                        |
| IP00006114        | SERPINF1 Pigment epithelium-derived factor precursor                                                                                                                   | VTQNLTIIEELTSEFIHIDIR          | g                        |
| IP00879931        | SERPING1 cDNA FLJ78023, highly similar to Homo sapiens serine (or cysteine) proteinase inhibitor, clade G (C1inhibitor), member 1, (angiodysplasia)                    | DTFVNASR                       | f; g                     |
| IP00879931        | SERPING1 cDNA FLJ78023, highly similar to Homo sapiens serine (or cysteine) proteinase inhibitor, clade G (C1inhibitor), member 1, (angiodysplasia)                    | YGLQLQSHLSLVLPQNLK             | g                        |
| IP00879931        | SERPING1 cDNA FLJ78023, highly similar to Homo sapiens serine (or cysteine) proteinase inhibitor, clade G (C1inhibitor), member 1, (angiodysplasia)                    | VLSSNSDANLELINTVWAK            | f; g                     |
| IP00016150        | SERPINI1 Neuroserpin precursor                                                                                                                                         | WVENSTNLSVK                    | g                        |
| IP00745872        | Serum albumin precursor                                                                                                                                                | AAFTTECCQAADK                  | g; d                     |
| IP00005724        | SEVENTRANSMEMBRANE-domain protein                                                                                                                                      | GYGLCHGSAGNVAFLTYLNLTQDMK      | b                        |
| IP00005724        | SEVENTRANSMEMBRANE-domain protein                                                                                                                                      | IPSHIQICETITLSTGENLAR          | b                        |
| IP00005724        | SEVENTRANSMEMBRANE-domain protein                                                                                                                                      | LHSLVKFSYDVCQLK                | b                        |
| IP00005724        | SEVENTRANSMEMBRANE-domain protein                                                                                                                                      | SITFLCGDAGPLAAVAALVYHK         | b                        |
| IP00879665        | SEZ6L Seizure related 6 homolog (Mouse)-like; SEZ6L. Isoform 5 of Seizure 6-like protein precursor; SEZ6L. Isoform 3 of Seizure 6-like protein precursor               | GVDGPITLVLANQTLVEGVQIR         | g                        |
| IP00879665        | SEZ6L Seizure related 6 homolog (Mouse)-like; SEZ6L. Isoform 5 of Seizure 6-like protein precursor; SEZ6L. Isoform 3 of Seizure 6-like protein precursor               | DPYWNDETPLCR                   | f                        |
| IP00853589        | SGCE sarcoglycan, epsilon isoform 3; SGCE sarcoglycan, epsilon isoform 2; SGCE sarcoglycan, epsilon isoform 1                                                          | LNAINITSLDR                    | f; g                     |
| IP00019988        | SGSH N-sulphoglucosamine sulphohydrolase precursor                                                                                                                     | DAGVLNDTLVIETSDNGIPFPSPGR      | f; g                     |
| IP00024540        | SH3-containing protein SH3GLB2                                                                                                                                         | CLHEFVK                        | b                        |
| IP00024540        | SH3-containing protein SH3GLB2                                                                                                                                         | RLLDACK                        | b                        |
| IP00925205        | SH3GLB2 Uncharacterized protein; SH3GLB2 Uncharacterized protein; SH3GLB2 Isoform 2 of Endophilin-B2; SH3GLB2 Isoform 1 of Endophilin-B2                               | GKVPVTVLELLS                   | n                        |
| IP00871570        | SIDT1 SID1 transmembrane family member 1 precursor; SIDT1 SID1 protein                                                                                                 | VYVNSSENLSYVLYVVR              | f                        |
| IP00166826        | Similar to Abl-phltn 2.SplICE isoform 2 of Q969W1 Zinc finger DHHC domain containing protein 16.Similar to RIKEN cDNA 1500015N03 gene                                  | RRCPTLRLGLVQRWR                | b                        |
| IP00098756        | similar to adaptor-related protein complex 2, beta 1 subunit                                                                                                           | CLEDEDPYVR                     | b                        |
| IP00098756        | similar to adaptor-related protein complex 2, beta 1 subunit                                                                                                           | CVSTLLDLIKTE                   | b                        |
| IP000329391       | Similar to dihydroipoamide S-acetyltransferase precursor.Dihydroipoamide acetyltransferase component of pyruvate dehydrogenase complex, mitochondrial                  | DVPVIGAICTGVGKPEDIEAFK         | b                        |
| IP00384285        | Similar to expressed sequence AA415817.Similar to expressed sequence AA415817.Hypothetical protein KIAA0251.similar to expressed sequence                              | HISCDALNR                      | b                        |
| IP00395917        | Similar to Ferritin heavy chain (Ferritin H subunit)                                                                                                                   | LATDKNDPMLCDFIETHYLEQVK        | b                        |
| IP00395917        | Similar to Ferritin heavy chain (Ferritin H subunit)                                                                                                                   | NDPHLCDFIETHYLEQVK             | b                        |
| IP00395917        | Similar to Ferritin heavy chain (Ferritin H subunit)                                                                                                                   | PHLCDFIETHYLEQVK               | b                        |
| IP00384484        | Similar to glycoprotein m6b.SplICE isoform 1 of Q13491 Neuronal membrane glycoprotein M6-b                                                                             | SREDCTKF                       | b                        |
| IP00173781        | Similar to Heat shock protein HSP 90-alpha (HSP 86)                                                                                                                    | HGLEVIYMELDKRYCVQQLK           | b                        |
| IP00173781        | Similar to Heat shock protein HSP 90-alpha (HSP 86)                                                                                                                    | TKFENLCK                       | b                        |
| IP00009931        | Similar to hypothetical protein MGC12904                                                                                                                               | EHILPSLAHLHPALDCLGEGSTPGL      | b                        |
| IP00848222        | Similar to Keratin, type I cytoskeletal 10                                                                                                                             | GGGFSSGGFSGSFSR                | f; g                     |
| IP00328182        | Similar to KIAA0573 protein                                                                                                                                            | VANLHDDCAFLSAGDVKSPER          | b                        |
| IP00328182        | Similar to KIAA0573 protein                                                                                                                                            | VDCDQHSIAQR                    | b                        |
| IP00217629        | Similar to KIAA0893 protein.Hypothetical protein                                                                                                                       | YCAYPDVIDPSAHETPK              | b                        |
| IP00173934        | Similar to peptidylprolyl isomerase A                                                                                                                                  | HTPGPILSMANAGLNTGSSQFFICTAK    | b                        |
| IP00374137        | Similar to Phosphatidylethanolamine-binding protein (PEBP)                                                                                                             | VYVLYVEQDRPLKCEDFILSNR         | b                        |
| IP00233081        | similar to ribosomal protein L18a.similar to ribosomal protein L18a.similar to ribosomal protein L18a.60S ribosomal protein L18a                                       | CHTPTLYR                       | b                        |
| IP00260257        | similar to ribosomal protein S12.IP00157456.1.ENSEMBL:ENSP0000302417.similar to ribosomal protein S12                                                                  | LVEALCAEHQINLIK                | b                        |
| IP00031107        | Similar to RIKEN cDNA 261020716 gene                                                                                                                                   | TAHTAAMDMLGGPGIESQCR           | b                        |
| IP00217143        | Similar to succinate dehydrogenase complex, subunit A, flavoprotein.Succinate dehydrogenase [ubiquinone] flavoprotein subunit, mitochondrial                           | LICALQTYVCAEKESR               | b                        |
| IP00656087        | SIRPA Isoform 1 of Tyrosine-protein phosphatase non-receptor type substrate 1 precursor                                                                                | AENQNVVTCQR                    | f; g                     |
| IP00656087        | SIRPA Isoform 1 of Tyrosine-protein phosphatase non-receptor type substrate 1 precursor                                                                                | GTANLSETR                      | f                        |
| IP00656087        | SIRPA Isoform 1 of Tyrosine-protein phosphatase non-receptor type substrate 1 precursor                                                                                | SISNTPADAGTYVCVK               | f                        |
| IP00656113        | SIRPA Signal-regulatory protein alpha; SIRPA signal-regulatory protein alpha precursor                                                                                 | DGTYNMWSMLLVNNSAHR             | f; g                     |
| IP00656113        | SIRPA Signal-regulatory protein alpha; SIRPA signal-regulatory protein alpha precursor                                                                                 | IGNITPADAGTYVCVK               | f                        |
| IP00656113        | SIRPA Signal-regulatory protein alpha; SIRPA signal-regulatory protein alpha precursor                                                                                 | LQLTWLENGVSR                   | f; g                     |
| IP00472047        | SIRT2 Isoform 3 of NAD-dependent deacetylase sirtuin-2; SIRT2 Isoform 2 of NAD-dependent deacetylase sirtuin-2; SIRT2 Isoform 1 of NAD-dependent deacetylase sirtuin-2 | EHASIDQSGAGVPPNPTSASP          | b                        |
| IP00014398        | Skeletal muscle LIM-protein 1                                                                                                                                          | CLIPLANETIVAK                  | b                        |
| IP00014398        | Skeletal muscle LIM-protein 1                                                                                                                                          | CSVNLANKR                      | b                        |
| IP00014398        | Skeletal muscle LIM-protein 1                                                                                                                                          | DGHHCCLK                       | b                        |
| IP00014398        | Skeletal muscle LIM-protein 1                                                                                                                                          | FVFHQEQVYCPDCAK                | b                        |
| IP00014398        | Skeletal muscle LIM-protein 1                                                                                                                                          | FWDHTCFR                       | b                        |
| IP00014398        | Skeletal muscle LIM-protein 1                                                                                                                                          | GEDFCYVTCHETK                  | b                        |
| IP00877110        | SLC12A5 Isoform 1 of Solute carrier family 12 member 5                                                                                                                 | FLNATCDVEFTFR                  | f; g                     |
| IP00877110        | SLC12A5 Isoform 1 of Solute carrier family 12 member 5                                                                                                                 | NNVTEIQGIPGAASGLIK             | f                        |



| IPI Accession No. | Protein Description                                                                                                                                                                                                                                                                                         | Peptide Sequence*                      | Primary Source Dataset** |
|-------------------|-------------------------------------------------------------------------------------------------------------------------------------------------------------------------------------------------------------------------------------------------------------------------------------------------------------|----------------------------------------|--------------------------|
| IP100219452       | Splice isoform 6 of O00154 Cytosolic acyl coenzyme A thioester hydrolase,Splice isoform 1 of O00154 Cytosolic acyl coenzyme A thioester hydrolase                                                                                                                                                           | <b>HCNSQNGER</b>                       | b                        |
| IP100304577       | Splice isoform A of O95782 Adapter-related protein complex 2 alpha 1 subunit,Splice isoform B of O95782 Adapter-related protein complex 2 alpha 1 subunit                                                                                                                                                   | <b>ACNQLGQFLQHR</b>                    | b; d                     |
| IP100304577       | Splice isoform A of O95782 Adapter-related protein complex 2 alpha 1 subunit,Splice isoform B of O95782 Adapter-related protein complex 2 alpha 1 subunit                                                                                                                                                   | <b>ALQVCGLLR</b>                       | b                        |
| IP100304577       | Splice isoform A of O95782 Adapter-related protein complex 2 alpha 1 subunit,Splice isoform B of O95782 Adapter-related protein complex 2 alpha 1 subunit                                                                                                                                                   | <b>FHLCSVATR</b>                       | b                        |
| IP100304577       | Splice isoform A of O95782 Adapter-related protein complex 2 alpha 1 subunit,Splice isoform B of O95782 Adapter-related protein complex 2 alpha 1 subunit                                                                                                                                                   | <b>NPDDFKTVCYSLAVSRLSR</b>             | b                        |
| IP100304577       | Splice isoform A of O95782 Adapter-related protein complex 2 alpha 1 subunit,Splice isoform B of O95782 Adapter-related protein complex 2 alpha 1 subunit                                                                                                                                                   | <b>QSAALCLLR</b>                       | b                        |
| IP100304577       | Splice isoform A of O95782 Adapter-related protein complex 2 alpha 1 subunit,Splice isoform B of O95782 Adapter-related protein complex 2 alpha 1 subunit                                                                                                                                                   | <b>VFPEALQAFACHENMKV</b>               | b                        |
| IP10032320        | Splice isoform A of Q9Y2J2 Band 4.1-like protein 3,Splice isoform B of Q9Y2J2 Band 4.1-like protein 3,Splice isoform C of Q9Y2J2 Band 4.1-like protein 3                                                                                                                                                    | <b>VILDLGSEYTCVDEKR</b>                | b                        |
| IP100183878       | Splice isoform B of O43236 Septin 4,Splice isoform A of O43236 Septin 4,ARTS protein,Bradeion alpha                                                                                                                                                                                                         | <b>DFSGNASHCPPEAK</b>                  | b                        |
| IP100395561       | Splice isoform B of Q9NQ66 1-phosphatidylinositol-4,5-bisphosphate phosphodiesterase beta 1,Splice isoform A of Q9NQ66 1-phosphatidylinositol-4,5-bisphosphate phosphodiesterase beta 1                                                                                                                     | <b>VFLNNLCRPEPDNISEFGAK</b>            | b                        |
| IP100217563       | Splice isoform Beta-1D of P05556 Integrin beta-1 precursor,Splice isoform Beta-1A of P05556 Integrin beta-1 precursor,Splice isoform Beta-1C of P05556 Integrin beta-1 precursor                                                                                                                            | <b>DKLPQVPQPPVSHCK</b>                 | b                        |
| IP100217563       | Splice isoform Beta-1D of P05556 Integrin beta-1 precursor,Splice isoform Beta-1A of P05556 Integrin beta-1 precursor,Splice isoform Beta-1C of P05556 Integrin beta-1 precursor                                                                                                                            | <b>QVAVCSGLIGWR</b>                    | b                        |
| IP100219628       | Splice isoform Beta-II of P05771 Protein kinase C, beta type,Splice isoform Beta-I of P05771 Protein kinase C, beta type                                                                                                                                                                                    | <b>CVMNPVSLCGDHTER</b>                 | b                        |
| IP100219628       | Splice isoform Beta-II of P05771 Protein kinase C, beta type,Splice isoform Beta-I of P05771 Protein kinase C, beta type                                                                                                                                                                                    | <b>VYALPKGPFQLTLCISCFQIMDR</b>         | b                        |
| IP100220993       | Splice isoform CNPI of P09543 2',3'-cyclic nucleotide 3'-phosphodiesterase,Splice isoform CNPII of P09543 2',3'-cyclic nucleotide 3'-phosphodiesterase                                                                                                                                                      | <b>AHTILGCAADVEAVQTGLDLEILR</b>        | b                        |
| IP100220993       | Splice isoform CNPI of P09543 2',3'-cyclic nucleotide 3'-phosphodiesterase,Splice isoform CNPII of P09543 2',3'-cyclic nucleotide 3'-phosphodiesterase                                                                                                                                                      | <b>DKPELQPFLLQDEDTVATLLECK</b>         | b                        |
| IP100220993       | Splice isoform CNPI of P09543 2',3'-cyclic nucleotide 3'-phosphodiesterase,Splice isoform CNPII of P09543 2',3'-cyclic nucleotide 3'-phosphodiesterase                                                                                                                                                      | <b>GCAADVEAVQTGLDLEILR</b>             | b                        |
| IP100220993       | Splice isoform CNPI of P09543 2',3'-cyclic nucleotide 3'-phosphodiesterase,Splice isoform CNPII of P09543 2',3'-cyclic nucleotide 3'-phosphodiesterase                                                                                                                                                      | <b>GSRAHTLGCADAVEAVQTGLDLEILR</b>      | b                        |
| IP100220993       | Splice isoform CNPI of P09543 2',3'-cyclic nucleotide 3'-phosphodiesterase,Splice isoform CNPII of P09543 2',3'-cyclic nucleotide 3'-phosphodiesterase                                                                                                                                                      | <b>ITLGCADVEAVQTGLDLEILR</b>           | b                        |
| IP100220993       | Splice isoform CNPI of P09543 2',3'-cyclic nucleotide 3'-phosphodiesterase,Splice isoform CNPII of P09543 2',3'-cyclic nucleotide 3'-phosphodiesterase                                                                                                                                                      | <b>FELQDEDTVATLLECK</b>                | b                        |
| IP100220993       | Splice isoform CNPI of P09543 2',3'-cyclic nucleotide 3'-phosphodiesterase,Splice isoform CNPII of P09543 2',3'-cyclic nucleotide 3'-phosphodiesterase                                                                                                                                                      | <b>RLDDELAAYCRR</b>                    | b                        |
| IP100220993       | Splice isoform CNPI of P09543 2',3'-cyclic nucleotide 3'-phosphodiesterase,Splice isoform CNPII of P09543 2',3'-cyclic nucleotide 3'-phosphodiesterase                                                                                                                                                      | <b>RPPGLVLCCTK</b>                     | b                        |
| IP100219543       | Splice isoform Delta-2 of Q14738 Serine/threonine protein phosphatase 2A, 56 kDa regulatory subunit, delta isoform,Splice isoform Delta-1 of Q14738 Serine/threonine protein phosphatase 2A, 56 kDa regulatory subunit, delta isoform                                                                       | <b>CTAKPSSSGK</b>                      | b                        |
| IP100219543       | Splice isoform Delta-2 of Q14738 Serine/threonine protein phosphatase 2A, 56 kDa regulatory subunit, delta isoform,Splice isoform Delta-1 of Q14738 Serine/threonine protein phosphatase 2A, 56 kDa regulatory subunit, delta isoform                                                                       | <b>CVSSPHQVAER</b>                     | b                        |
| IP100219543       | Splice isoform Delta-2 of Q14738 Serine/threonine protein phosphatase 2A, 56 kDa regulatory subunit, delta isoform,Splice isoform Delta-1 of Q14738 Serine/threonine protein phosphatase 2A, 56 kDa regulatory subunit, delta isoform                                                                       | <b>SLSVYHPQLAYCVQFLEK</b>              | b                        |
| IP10020792        | Splice isoform DM-20 of P06905 Myelin proteolipid protein,Splice isoform 1 of P06905 Myelin proteolipid protein                                                                                                                                                                                             | <b>IGSLCADAR</b>                       | b                        |
| IP10020792        | Splice isoform DM-20 of P06905 Myelin proteolipid protein,Splice isoform 1 of P06905 Myelin proteolipid protein                                                                                                                                                                                             | <b>SIGSLCADAR</b>                      | b                        |
| IP100301512       | Splice isoform DPPX-L of P42658 Dipeptidyl aminopeptidase-like protein 6,Splice isoform DPPX-S of P42658 Dipeptidyl aminopeptidase-like protein 6                                                                                                                                                           | <b>SINFFVECFR</b>                      | b                        |
| IP100216529       | Splice isoform E of P20020 Plasma membrane calcium-transporting ATPase 1,Splice isoform D of P20020 Plasma membrane calcium-transporting ATPase 1                                                                                                                                                           | <b>CGIHPGEDFLCLEGK,CGIHPGEDFLCLEGK</b> | b                        |
| IP100216529       | Splice isoform E of P20020 Plasma membrane calcium-transporting ATPase 1,Splice isoform D of P20020 Plasma membrane calcium-transporting ATPase 1                                                                                                                                                           | <b>CGIHPGEDFLCLEGK,CGIHPGEDFLCLEGK</b> | b                        |
| IP100216529       | Splice isoform E of P20020 Plasma membrane calcium-transporting ATPase 1,Splice isoform D of P20020 Plasma membrane calcium-transporting ATPase 1                                                                                                                                                           | <b>TECALLGLLDDLK</b>                   | b                        |
| IP100216529       | Splice isoform E of P20020 Plasma membrane calcium-transporting ATPase 1,Splice isoform D of P20020 Plasma membrane calcium-transporting ATPase 1                                                                                                                                                           | <b>TICLAFR</b>                         | b                        |
| IP100329733       | Splice isoform IIC2 of O00499 Myc box dependent interacting protein 1,Splice isoform IID of O00499 Myc box dependent interacting protein 1,Splice isoform IIE of O00499 Myc box dependent interacting protein 1                                                                                             | <b>ADETKDEQFEQCVQFNK</b>               | b                        |
| IP100329733       | Splice isoform IIC2 of O00499 Myc box dependent interacting protein 1,Splice isoform IID of O00499 Myc box dependent interacting protein 1,Splice isoform IIE of O00499 Myc box dependent interacting protein 1                                                                                             | <b>KLNECLQVEYEPDWPGRDEANK</b>          | b                        |
| IP100289159       | Splice isoform KGA of O94925 Glutaminase, kidney isoform, mitochondrial precursor,Splice isoform GAC of O94925 Glutaminase, kidney isoform, mitochondrial precursor                                                                                                                                         | <b>LKCEMDMLR</b>                       | b                        |
| IP100244574       | Splice isoform Liver of P36542 ATP synthase gamma chain, mitochondrial precursor                                                                                                                                                                                                                            | <b>GLCGAHSSIAK</b>                     | b                        |
| IP100006482       | Splice isoform Long of P05023 Sodium/potassium-transporting ATPase alpha-1 chain precursor                                                                                                                                                                                                                  | <b>CSSILLHGK</b>                       | b                        |
| IP100006482       | Splice isoform Long of P05023 Sodium/potassium-transporting ATPase alpha-1 chain precursor                                                                                                                                                                                                                  | <b>IHSANGCK</b>                        | b                        |
| IP100005614       | Splice isoform Long of Q01082 Spectrin beta chain, brain 1                                                                                                                                                                                                                                                  | <b>DALLSALSQNYHLECNETK</b>             | b                        |
| IP100005614       | Splice isoform Long of Q01082 Spectrin beta chain, brain 1                                                                                                                                                                                                                                                  | <b>EAVCEVALDYKK</b>                    | b                        |
| IP100005614       | Splice isoform Long of Q01082 Spectrin beta chain, brain 1                                                                                                                                                                                                                                                  | <b>FATDGGYKPCDPQVIR</b>                | b                        |
| IP100005614       | Splice isoform Long of Q01082 Spectrin beta chain, brain 1                                                                                                                                                                                                                                                  | <b>IHLLENVDK</b>                       | b                        |
| IP100005614       | Splice isoform Long of Q01082 Spectrin beta chain, brain 1                                                                                                                                                                                                                                                  | <b>VAHMEFYQELCQLAAR</b>                | b                        |
| IP100216220       | Splice isoform p27-S of O00233 26S proteasome non-ATPase regulatory subunit 9,Splice isoform p27-L of O00233 26S proteasome non-ATPase regulatory subunit 9                                                                                                                                                 | <b>HNICLQNDHK</b>                      | b                        |
| IP100216220       | Splice isoform p27-S of O00233 26S proteasome non-ATPase regulatory subunit 9,Splice isoform p27-L of O00233 26S proteasome non-ATPase regulatory subunit 9                                                                                                                                                 | <b>HNICLQNDHK</b>                      | b                        |
| IP100219825       | Splice isoform Sap-mu-9 of P07602 Proactivator polypeptide precursor [Contains: Saposin A (Protein A); Saposin B (Sphingolipid activator protein 2)],Splice isoform Sap-lambda of P07602 Proactivator polypeptide precursor [Contains: Saposin A (Protein A); Saposin B (Sphingolipid activator protein 2)] | <b>GCSFLPDPYQK</b>                     | a; b; c; d; e            |
| IP100219825       | Splice isoform Sap-mu-9 of P07602 Proactivator polypeptide precursor [Contains: Saposin A (Protein A); Saposin B (Sphingolipid activator protein 2)],Splice isoform Sap-lambda of P07602 Proactivator polypeptide precursor [Contains: Saposin A (Protein A); Saposin B (Sphingolipid activator protein 2)] | <b>GEMSRPGEVCSALNLCESLQK</b>           | b                        |
| IP100216256       | Splice isoform Short of O75083 WD-repeat protein 1,Similar to WD repeat domain 1,Splice isoform Long of O75083 WD-repeat protein 1                                                                                                                                                                          | <b>CVAVGGYVAVVVCGIQ</b>                | b                        |
| IP100216256       | Splice isoform Short of O75083 WD-repeat protein 1,Similar to WD repeat domain 1,Splice isoform Long of O75083 WD-repeat protein 1                                                                                                                                                                          | <b>GPVTDVAVSHDQAFVAVCDASK</b>          | b                        |
| IP100216256       | Splice isoform Short of O75083 WD-repeat protein 1,Similar to WD repeat domain 1,Splice isoform Long of O75083 WD-repeat protein 1                                                                                                                                                                          | <b>SIQCLTVHK</b>                       | b                        |
| IP100216283       | Splice isoform Short of P23471 Receptor-type protein-tyrosine phosphatase zeta precursor,Splice isoform Long of P23471 Receptor-type protein-tyrosine phosphatase zeta precursor                                                                                                                            | <b>AGTFCTLTLMHOLEK</b>                 | b                        |
| IP100218830       | Splice isoform Short of P30419 Glycylpeptide N-tetradecanoyltransferase 1,Splice isoform Long of P30419 Glycylpeptide N-tetradecanoyltransferase 1                                                                                                                                                          | <b>CPSMGAEKVGLVLQ</b>                  | b                        |
| IP100218830       | Splice isoform Short of P30419 Glycylpeptide N-tetradecanoyltransferase 1,Splice isoform Long of P30419 Glycylpeptide N-tetradecanoyltransferase 1                                                                                                                                                          | <b>KMVEINFLCVHK</b>                    | b                        |
| IP100289855       | Splice isoform Short of Q12979 Active breakpoint cluster region-related protein,Splice isoform Long of Q12979 Active breakpoint cluster region-related protein                                                                                                                                              | <b>HQQDYCK</b>                         | b                        |
| IP10021038        | Splice isoform Short of Q9Y2Q0 Potential phospholipid-transporting ATPase 1A,Splice isoform Long of Q9Y2Q0 Potential phospholipid-transporting ATPase 1A                                                                                                                                                    | <b>CENNHSTAK</b>                       | b                        |
| IP10002302        | Splice isoform Synapsin IIa of Q92777 Synapsin II,Splice isoform Synapsin IIb of Q92777 Synapsin II                                                                                                                                                                                                         | <b>DGKDYFVEVDMCSMPLGEHQVEDR</b>        | b                        |
| IP100216531       | Splice isoform Vint of P13611 Versican core protein precursor,Splice isoform V0 of P13611 Versican core protein precursor                                                                                                                                                                                   | <b>CDVMYGIEDQTVSLTVLTDGVVFHYR</b>      | b                        |
| IP100219294       | Splice isoform XA of Q01814 Plasma membrane calcium-transporting ATPase 2,Splice isoform ZA of Q01814 Plasma membrane calcium-transporting ATPase 2                                                                                                                                                         | <b>CGIHPGEDFLCLEGK</b>                 | b                        |
| IP100219294       | Splice isoform XA of Q01814 Plasma membrane calcium-transporting ATPase 2,Splice isoform ZA of Q01814 Plasma membrane calcium-transporting ATPase 2                                                                                                                                                         | <b>TECCLLGFVLDLK</b>                   | b                        |
| IP100219256       | Splice isoform XA of Q16720 Plasma membrane calcium-transporting ATPase 3,Splice isoform ZE of Q16720 Plasma membrane calcium-transporting ATPase 3                                                                                                                                                         | <b>TECALLGFVLDLK</b>                   | b                        |
| IP100879810       | SPTAN1 Uncharacterized protein; SPTAN1 Isoform 2 of Spectrin alpha chain, brain; SPTAN1 Isoform 1 of Spectrin alpha chain, brain                                                                                                                                                                            | <b>SLQLALEER</b>                       | d; h                     |
| IP100005614       | SPTBN1 Isoform Long of Spectrin beta chain, brain 1                                                                                                                                                                                                                                                         | <b>CGQVSNQLPAEQSPR</b>                 | h                        |
| IP100029601       | Src substrate cortactin,Similar to cortactin isoform B                                                                                                                                                                                                                                                      | <b>HCSQVDSVR</b>                       | b                        |
| IP100449669       | SSR1 Isoform 2 of Transferrin-associated protein subunit alpha precursor; SSR1 Isoform 1 of Transferrin-associated protein subunit alpha precursor                                                                                                                                                          | <b>IPQDYQFYQNTALPLNTVVPQR</b>          | f; g                     |
| IP10007676        | Steroid dehydrogenase homolog                                                                                                                                                                                                                                                                               | <b>TFVDFISQCLHEEYR</b>                 | b                        |
| IP100643115       | STMN1 Stathmin                                                                                                                                                                                                                                                                                              | <b>DLSLEEIQK</b>                       | e; d; h                  |
| IP100643115       | STMN1 Stathmin                                                                                                                                                                                                                                                                                              | <b>ESVPEFPLSPPK</b>                    | b                        |
| IP10007765        | Stress-70 protein, mitochondrial precursor                                                                                                                                                                                                                                                                  | <b>MEEFKDQLPADECNK</b>                 | b                        |
| IP10007765        | Stress-70 protein, mitochondrial precursor                                                                                                                                                                                                                                                                  | <b>RTIAPCQK</b>                        | b                        |
| IP10013894        | Stress-induced-phosphoprotein 1                                                                                                                                                                                                                                                                             | <b>AAALEFLNR</b>                       | d                        |
| IP100465078       | Striated muscle preferentially expressed myosin heavy chain 2B                                                                                                                                                                                                                                              | <b>AASLDERTRQR</b>                     | a                        |
| IP100307433       | STS Seryl-sulfatase precursor                                                                                                                                                                                                                                                                               | <b>LANDLTLYFTSDQGAHVEEYSSK</b>         | f                        |
| IP100003370       | STX1A Isoform 1 of Syntaxin-1A                                                                                                                                                                                                                                                                              | <b>TAKSDDDDDVAVTVDRDR</b>              | h                        |
| IP100221099       | STX1A Isoform 3 of Syntaxin-1A                                                                                                                                                                                                                                                                              | <b>HSAILASPNDEK</b>                    | h                        |
| IP100221099       | STX1A Isoform 3 of Syntaxin-1A                                                                                                                                                                                                                                                                              | <b>TAKSDDDDDVAVTVDR</b>                | h                        |
| IP100795234       | STX1A Uncharacterized protein; STX1A Uncharacterized protein; STX1A Isoform 3 of Syntaxin-1A; STX1A Isoform 2 of Syntaxin-1A; STX1A Isoform 1 of Syntaxin-1A                                                                                                                                                | <b>KHSAILASPNDEK</b>                   | h                        |
| IP10637774        | STX1B Syntaxin 1B alternative isoform deltaTM                                                                                                                                                                                                                                                               | <b>SARSDDEEVEVHVDK</b>                 | h                        |
| IP100305166       | Succinate dehydrogenase [ubiquinone] flavoprotein subunit, mitochondrial precursor                                                                                                                                                                                                                          | <b>AGLPQDLEFVQHPHTGIVGAGCLTEGCR</b>    | b                        |
| IP100305166       | Succinate dehydrogenase [ubiquinone] flavoprotein subunit, mitochondrial precursor                                                                                                                                                                                                                          | <b>HVNGDQVQVPLGACGAAACASVHGANKR</b>    | b                        |
| IP100218733       | superoxide dismutase 1, soluble                                                                                                                                                                                                                                                                             | <b>DGVAVSIEDSIVISLGDHCTIGR</b>         | b                        |
| IP100218733       | superoxide dismutase 1, soluble                                                                                                                                                                                                                                                                             | <b>EDSVISLGDHCTIGR</b>                 | b                        |
| IP100645484       | SV2A Isoform 2 of Synaptic vesicle glycoprotein 2A; SV2A Isoform 1 of Synaptic vesicle glycoprotein 2A                                                                                                                                                                                                      | <b>AESGGKGER</b>                       | h                        |
| IP100645484       | SV2A Isoform 2 of Synaptic vesicle glycoprotein 2A; SV2A Isoform 1 of Synaptic vesicle glycoprotein 2A                                                                                                                                                                                                      | <b>LINSTFLHK</b>                       | f; g                     |
| IP100645484       | SV2A Isoform 2 of Synaptic vesicle glycoprotein 2A; SV2A Isoform 1 of Synaptic vesicle glycoprotein 2A                                                                                                                                                                                                      | <b>NCFTINTVFYNTDLFEYK</b>              | f                        |
| IP100645484       | SV2A Isoform 2 of Synaptic vesicle glycoprotein 2A; SV2A Isoform 1 of Synaptic vesicle glycoprotein 2A                                                                                                                                                                                                      | <b>NTVFYNTDLFEYK</b>                   | f                        |
| IP100645484       | SV2A Isoform 2 of Synaptic vesicle glycoprotein 2A; SV2A Isoform 1 of Synaptic vesicle glycoprotein 2A                                                                                                                                                                                                      | <b>VEHVTNFTLENQIHR</b>                 | f; g                     |
| IP10006631        | SV2B Synaptic vesicle glycoprotein 2B                                                                                                                                                                                                                                                                       | <b>FINSTLEQK</b>                       | f; g                     |
| IP10006631        | SV2B Synaptic vesicle glycoprotein 2B                                                                                                                                                                                                                                                                       | <b>INSTLEQK</b>                        | f                        |
| IP10006631        | SV2B Synaptic vesicle glycoprotein 2B                                                                                                                                                                                                                                                                       | <b>NCFTINTVFYNTDLFEYK</b>              | f                        |
| IP10006631        | SV2B Synaptic vesicle glycoprotein 2B                                                                                                                                                                                                                                                                       | <b>VFFGEHYV</b>                        | f                        |
| IP10006631        | SV2B Synaptic vesicle glycoprotein 2B                                                                                                                                                                                                                                                                       | <b>VFFGEHYVYGAINTFTMENQIHQHGK</b>      | f                        |
| IP100173947       | SV2C Synaptic vesicle glycoprotein 2C                                                                                                                                                                                                                                                                       | <b>NCFTINTVFYNTDLFEYK</b>              | f; g                     |
| IP100300568       | SYN1 Isoform IA of Synapsin-1                                                                                                                                                                                                                                                                               | <b>DASPGRGSQGTPSPGALPLGR</b>           | h                        |
| IP100300568       | SYN1 Isoform IA of Synapsin-1                                                                                                                                                                                                                                                                               | <b>PQPPPPGAHSPGATPGPTATAER</b>         | h                        |
| IP100027770       | Synaptophysin                                                                                                                                                                                                                                                                                               | <b>LHQVYDAPTCR</b>                     | b; d; e                  |
| IP100047169       | Synaptotagmin                                                                                                                                                                                                                                                                                               | <b>LHQVTEVPTCEGK</b>                   | b                        |
| IP100047169       | SYNPR Synaptotagmin                                                                                                                                                                                                                                                                                         | <b>LSVDCVNK</b>                        | f                        |

| IPI Accession No. | Protein Description                                                                                                            | Peptide Sequence*                    | Primary Source Dataset** |
|-------------------|--------------------------------------------------------------------------------------------------------------------------------|--------------------------------------|--------------------------|
| IP100047169       | SYNPR Synaptaporin                                                                                                             | TESNLSIDLAFYFPR                      | f; g                     |
| IP100982472       | TALD01 Transaldolase                                                                                                           | TIVMGASFR                            | h                        |
| IP100651745       | Target of myb1-like 2 isoform 1                                                                                                | AAEMVPLDPSPPMEAPAPASNPGR             | e                        |
| IP100478127       | TCEAL3 Transcription elongation factor A protein-like 3                                                                        | GTDDSPKDSQEDLQER                     | h                        |
| IP100015869       | TCHH Trichohyalin                                                                                                              | LEEEQLHRQQRQRK                       | g                        |
| IP100290566       | T-complex protein 1, alpha subunit, similar to T-complex protein 1, alpha subunit (TCP-1-alpha) (CCT-alpha)                    | SLHDLACVVK                           | b                        |
| IP100297779       | T-complex protein 1, beta subunit                                                                                              | TVYGGGCESEMLMAHAVTQLANR              | b                        |
| IP100297779       | T-complex protein 1, beta subunit                                                                                              | YPDHIPC                              | b                        |
| IP100010720       | T-complex protein 1, epsilon subunit                                                                                           | EMNPALGIDCLHK                        | b                        |
| IP100018465       | T-complex protein 1, eta subunit                                                                                               | TCTFLR                               | b                        |
| IP100018465       | T-complex protein 1, eta subunit                                                                                               | YNFTFGCPK                            | b; e                     |
| IP100015029       | Telomerase-binding protein p23                                                                                                 | HLNEIDLFDIDPNDK                      | b                        |
| IP100057097       | Terminal deoxynucleotidyltransferase                                                                                           | AAAGMVKPKSCEPIR                      | a                        |
| IP100004450       | Testes specific heterogenous nuclear                                                                                           | AAPSGPAR                             | a                        |
| IP100798430       | TF Transferrin variant (Fragment); TF Serotransferrin precursor                                                                | APNIAVTR                             | g                        |
| IP100798430       | TF Transferrin variant (Fragment); TF Serotransferrin precursor                                                                | AVAVVK                               | g                        |
| IP100798430       | TF Transferrin variant (Fragment); TF Serotransferrin precursor                                                                | CGLVPLVAENYVK                        | f; g                     |
| IP100798430       | TF Transferrin variant (Fragment); TF Serotransferrin precursor                                                                | CGLVPLVAENYKNSDNCEDTPEAGYFAVAVVK     | g                        |
| IP100798430       | TF Transferrin variant (Fragment); TF Serotransferrin precursor                                                                | EDTPEAGYFAVAVVK                      | g                        |
| IP100798430       | TF Transferrin variant (Fragment); TF Serotransferrin precursor                                                                | EFQLFSSPHGK                          | g                        |
| IP100798430       | TF Transferrin variant (Fragment); TF Serotransferrin precursor                                                                | GSNVTDSCGNFCFLFR                     | g                        |
| IP100798430       | TF Transferrin variant (Fragment); TF Serotransferrin precursor                                                                | HSTIFENLANK                          | a                        |
| IP100798430       | TF Transferrin variant (Fragment); TF Serotransferrin precursor                                                                | KPVEEYANCHLAR                        | b                        |
| IP100798430       | TF Transferrin variant (Fragment); TF Serotransferrin precursor                                                                | LVPVLAENYVK                          | g                        |
| IP100798430       | TF Transferrin variant (Fragment); TF Serotransferrin precursor                                                                | PEAGYFAVAVVK                         | g                        |
| IP100798430       | TF Transferrin variant (Fragment); TF Serotransferrin precursor                                                                | QQQLF                                | g                        |
| IP100798430       | TF Transferrin variant (Fragment); TF Serotransferrin precursor                                                                | QQQLFLG                              | g                        |
| IP100798430       | TF Transferrin variant (Fragment); TF Serotransferrin precursor                                                                | QQQLFGSNVTD                          | g                        |
| IP100798430       | TF Transferrin variant (Fragment); TF Serotransferrin precursor                                                                | QQQLFGSNVTDSCGN                      | g                        |
| IP100798430       | TF Transferrin variant (Fragment); TF Serotransferrin precursor                                                                | QQQLFGSNVTDSCGNF                     | f; g                     |
| IP100798430       | TF Transferrin variant (Fragment); TF Serotransferrin precursor                                                                | QQQLFGSNVTDSCGNFCL                   | g                        |
| IP100798430       | TF Transferrin variant (Fragment); TF Serotransferrin precursor                                                                | QQQLFGSNVTDSCGNFCFL                  | f; g                     |
| IP100798430       | TF Transferrin variant (Fragment); TF Serotransferrin precursor                                                                | QQQLFGSNVTDSCGNFCFLFR                | f; g                     |
| IP100798430       | TF Transferrin variant (Fragment); TF Serotransferrin precursor                                                                | SDNCEDTPEAGYFAVAVVK                  | g                        |
| IP100798430       | TF Transferrin variant (Fragment); TF Serotransferrin precursor                                                                | SETKDLLFRDDTVCCLAK                   | g                        |
| IP100798430       | TF Transferrin variant (Fragment); TF Serotransferrin precursor                                                                | SVIPSDGPSVACVK                       | g                        |
| IP100798430       | TF Transferrin variant (Fragment); TF Serotransferrin precursor                                                                | VPLVAENYKNSDNCEDTPEAGYFAVAVVK        | g                        |
| IP100798430       | TF Transferrin variant (Fragment); TF Serotransferrin precursor                                                                | GDVAVVK                              | g                        |
| IP100798430       | TF Transferrin variant (Fragment); TF Serotransferrin precursor                                                                | PVLAENYKNSDNCEDTPEAGYFAVAVVK         | g                        |
| IP100798430       | TF Transferrin variant (Fragment); TF Serotransferrin precursor                                                                | SETKDLLFR                            | g                        |
| IP100798430       | TF Transferrin variant (Fragment); TF Serotransferrin precursor                                                                | SGNFCFLR                             | g                        |
| IP100216293       | Thiosulfate sulfurtransferase                                                                                                  | KVDLSQPLIATCR                        | b                        |
| IP100555577       | THY1 Thy-1 cell surface antigen variant (Fragment)                                                                             | DCRHENTSSPIQYFESLTR                  | f                        |
| IP100555577       | THY1 Thy-1 cell surface antigen variant (Fragment)                                                                             | DEGTYTICALHHSGHSPPISSQNVTVLR         | f; g                     |
| IP100555577       | THY1 Thy-1 cell surface antigen variant (Fragment)                                                                             | EGTYTICALHHSGHSPPISSQNVTVLR          | f; g                     |
| IP100555577       | THY1 Thy-1 cell surface antigen variant (Fragment)                                                                             | ENTSSSPIQYFESLTR                     | f; g                     |
| IP100555577       | THY1 Thy-1 cell surface antigen variant (Fragment)                                                                             | ETKKHVLFTGVVPEHTYR                   | f; g                     |
| IP100555577       | THY1 Thy-1 cell surface antigen variant (Fragment)                                                                             | HENTSSSPIQYF                         | f; g                     |
| IP100555577       | THY1 Thy-1 cell surface antigen variant (Fragment)                                                                             | HENTSSSPIQYFESLTR                    | f; g                     |
| IP100555577       | THY1 Thy-1 cell surface antigen variant (Fragment)                                                                             | HSPPISSQNVTVLR                       | f                        |
| IP100555577       | THY1 Thy-1 cell surface antigen variant (Fragment)                                                                             | PIQYFESLTR                           | f; g                     |
| IP100555577       | THY1 Thy-1 cell surface antigen variant (Fragment)                                                                             | PPISSQNVTVLR                         | f                        |
| IP100555577       | THY1 Thy-1 cell surface antigen variant (Fragment)                                                                             | QYFESLTR                             | f; g                     |
| IP100555577       | THY1 Thy-1 cell surface antigen variant (Fragment)                                                                             | SPIQYFESLTR                          | f                        |
| IP100555577       | THY1 Thy-1 cell surface antigen variant (Fragment)                                                                             | SSPIQYFESLTR                         | f; g                     |
| IP100555577       | THY1 Thy-1 cell surface antigen variant (Fragment)                                                                             | TNFTSK                               | f                        |
| IP100555577       | THY1 Thy-1 cell surface antigen variant (Fragment); THY1 Thy-1 membrane glycoprotein precursor                                 | ALHHSGHSPPISSQNVTVLR                 | f                        |
| IP100555577       | THY1 Thy-1 cell surface antigen variant (Fragment); THY1 Thy-1 membrane glycoprotein precursor                                 | DEGTYTICALH                          | f                        |
| IP100555577       | THY1 Thy-1 cell surface antigen variant (Fragment); THY1 Thy-1 membrane glycoprotein precursor                                 | DEGTYTICALHHS                        | f; g                     |
| IP100555577       | THY1 Thy-1 cell surface antigen variant (Fragment); THY1 Thy-1 membrane glycoprotein precursor                                 | GHSPPPISSQNVTVLR                     | f; g                     |
| IP100555577       | THY1 Thy-1 cell surface antigen variant (Fragment); THY1 Thy-1 membrane glycoprotein precursor                                 | HENTSSSPIQY                          | f                        |
| IP100555577       | THY1 Thy-1 cell surface antigen variant (Fragment); THY1 Thy-1 membrane glycoprotein precursor                                 | HENTSSSPIQYF                         | f                        |
| IP100555577       | THY1 Thy-1 cell surface antigen variant (Fragment); THY1 Thy-1 membrane glycoprotein precursor                                 | HSGHSPPISSQNVTVLR                    | f; g                     |
| IP100555577       | THY1 Thy-1 cell surface antigen variant (Fragment); THY1 Thy-1 membrane glycoprotein precursor                                 | LDCRIHENTSSSPIQYFESLTR               | f; g                     |
| IP100555577       | THY1 Thy-1 cell surface antigen variant (Fragment); THY1 Thy-1 membrane glycoprotein precursor                                 | LHHSGHSPPISSQNVTVLR                  | f; g                     |
| IP100555577       | THY1 Thy-1 cell surface antigen variant (Fragment); THY1 Thy-1 membrane glycoprotein precursor                                 | RHENTSSSPIQYFESLTR                   | f                        |
| IP100555577       | THY1 Thy-1 cell surface antigen variant (Fragment); THY1 Thy-1 membrane glycoprotein precursor                                 | SGHSPPISSQNVTVLR                     | f                        |
| IP100555577       | THY1 Thy-1 cell surface antigen variant (Fragment); THY1 Thy-1 membrane glycoprotein precursor                                 | SPPISSQNVTVLR                        | f                        |
| IP100555577       | THY1 Thy-1 cell surface antigen variant (Fragment); THY1 Thy-1 membrane glycoprotein precursor                                 | TCALHHSGHSPPISSQNVTVLR               | f                        |
| IP100032292       | TIMP1 Metalloproteinase inhibitor 1 precursor                                                                                  | FVGTPEVNTLLYQR                       | g                        |
| IP100032292       | TIMP1 Metalloproteinase inhibitor 1 precursor                                                                                  | SHNRSEFLIAGK                         | g                        |
| IP100032292       | TIMP1 Metalloproteinase inhibitor 1 precursor                                                                                  | EPGLCTWQSLR                          | g                        |
| IP100030513       | TLDC domain containing protein                                                                                                 | AKPTCTTYNSPQSAQENFQDK                | b                        |
| IP100030847       | TM9SF3 Transmembrane 9 superfamily member 3 precursor                                                                          | ITDVNLTSEKQ                          | f; g                     |
| IP100023542       | TMED9 transmembrane emp24 protein transport domain containing 9                                                                | FTTSHTPGEHQICLHNSK                   | f                        |
| IP100293588       | TMEF1 Isoform 1 of Tomoregulin-1 precursor                                                                                     | SINCELSNR                            | f                        |
| IP100395903       | TMEM106B Transmembrane protein 106B                                                                                            | LNNITIIIGPLDMK                       | f; g                     |
| IP100019381       | TMEM30A Isoform 1 of Cell cycle control protein 50A                                                                            | FCTINFTLEK                           | f                        |
| IP100019381       | TMEM30A Isoform 1 of Cell cycle control protein 50A                                                                            | YPVHYFDGR                            | f; g                     |
| IP100019381       | TMEM30A Isoform 1 of Cell cycle control protein 50A                                                                            | YSLNVTYNPVHYFDGR                     | f                        |
| IP100816013       | TMEM87A Isoform 3 of Transmembrane protein 87A precursor; TMEM87A Isoform 1 of Transmembrane protein 87A precursor; TMEM87A cD | LFQNCSELFK                           | f; g                     |
| IP100220213       | TNC Isoform 4 of Tenascin precursor; TNC Isoform 1 of Tenascin precursor                                                       | GFESEPVSGFTTALDPSGLVTANTDSEALAR      | f; g                     |
| IP100220213       | TNC Isoform 4 of Tenascin precursor; TNC Isoform 1 of Tenascin precursor                                                       | LLETVEYNSGAR                         | f; g                     |
| IP100220213       | TNC Isoform 4 of Tenascin precursor; TNC Isoform 1 of Tenascin precursor                                                       | LNWTAADQAYEHFIQVQEAANK               | f; g                     |
| IP100220213       | TNC Isoform 4 of Tenascin precursor; TNC Isoform 1 of Tenascin precursor                                                       | LNYSLPTGQWGWQLPR                     | f; g                     |
| IP100220213       | TNC Isoform 4 of Tenascin precursor; TNC Isoform 1 of Tenascin precursor                                                       | NLTVPGSLR                            | f; g                     |
| IP100220213       | TNC Isoform 4 of Tenascin precursor; TNC Isoform 1 of Tenascin precursor                                                       | NTTSVLR                              | f; g                     |
| IP100220213       | TNC Isoform 4 of Tenascin precursor; TNC Isoform 1 of Tenascin precursor                                                       | VEAAQNLTLPGSLR                       | f; g                     |
| IP10004413        | TNFRSF21 Tumor necrosis factor receptor superfamily member 21 precursor                                                        | YLSIQEQVTPDNTSSAR                    | f                        |
| IP100160552       | TNR Isoform 1 of Tenascin-R precursor                                                                                          | NNEGQVIAQVPSDVTSENFQGLKPGEEYIVNVVALK | f                        |
| IP100160552       | TNR Isoform 1 of Tenascin-R precursor                                                                                          | PPANLTASEVTR                         | f; g                     |
| IP100160552       | TNR Isoform 1 of Tenascin-R precursor                                                                                          | QQSLESTVDAFTGFR                      | f                        |
| IP100160552       | TNR Isoform 1 of Tenascin-R precursor                                                                                          | QQSLESTVDAFTGFRPI                    | f; g                     |
| IP100160552       | TNR Isoform 1 of Tenascin-R precursor                                                                                          | QSVVEEGGIANVNTSSK                    | f                        |
| IP100554760       | TNR Isoform 2 of Tenascin-R precursor                                                                                          | GTNEDSATTFTEIDAPK                    | f; g                     |
| IP100554760       | TNR Isoform 2 of Tenascin-R precursor; TNR Isoform 1 of Tenascin-R precursor                                                   | CANGTCLCEEGYVGDGQGR                  | f; g                     |
| IP100382392       | Tomosyn                                                                                                                        | KPEPCPKILK                           | b                        |

| IPI Accession No. | Protein Description                                                                                                                            | Peptide Sequence*                  | Primary Source Dataset** |
|-------------------|------------------------------------------------------------------------------------------------------------------------------------------------|------------------------------------|--------------------------|
| IP100382392       | Tomosyn                                                                                                                                        | RPCLTVMHGK                         | b                        |
| IP100644766       | TOR1AIP1 cDNA FLJ78048, highly similar to Homo sapiens torsin A interacting protein 1, mRNA                                                    | RSQTFLEK                           | f; g                     |
| IP100009111       | TPBG Trophoblast glycoprotein precursor                                                                                                        | HLDLSSNLSVSLTVSFR                  | f; g                     |
| IP100009111       | TPBG Trophoblast glycoprotein precursor                                                                                                        | NLTVPTDLPAYVR                      | f; g                     |
| IP100009111       | TPBG Trophoblast glycoprotein precursor                                                                                                        | RPPLAELAAALNSGSR                   | f; g                     |
| IP100009111       | TPBG Trophoblast glycoprotein precursor                                                                                                        | VLHNGTLAELQGLPHIR                  | f; g                     |
| IP100554538       | TPP1 60 kDa protein; TPP1 Isoform 1 of Tripeptidyl-peptidase 1 precursor                                                                       | TVSYGDDSDLSASAIQR                  | f; g                     |
| IP100298237       | TPP1 Isoform 1 of Tripeptidyl-peptidase 1 precursor                                                                                            | FLSSSPHLPSSYFNASGR                 | f; g                     |
| IP100154451       | Transcriptional coactivator MMS19, MMS19 protein                                                                                               | ADAEDLDSFLSNLQDCR                  | b                        |
| IP100000009       | Transforming protein p21A, Transforming protein p21b,                                                                                          | CDLPSR                             | b                        |
| IP100000041       | Transforming protein RhoB                                                                                                                      | HFCPNVPILVANK                      | b                        |
| IP100000041       | Transforming protein RhoB                                                                                                                      | HFCPNVPILVANKK                     | b                        |
| IP100000041       | Transforming protein RhoB                                                                                                                      | KLVVVDGACGK                        | b                        |
| IP100000041       | Transforming protein RhoB                                                                                                                      | LRPLSYPTDVLIMCFSDPSLENIPEK         | b                        |
| IP100027434       | Transforming protein RhoC, Transforming protein RhoA                                                                                           | LRPLSYPTDVLIAICF                   | b                        |
| IP10024057        | Transgelin 2                                                                                                                                   | DGTVLCELINALYPEGQAPVKK             | b                        |
| IP100556415       | Transgelin variant (Fragment)                                                                                                                  | AAEDYGVIK                          | c                        |
| IP100022774       | Transitional endoplasmic reticulum ATPase (TER ATPase) (15S Mg(2+)-ATPase p97 subunit) (Valosin containing protein) (VCP) [Contains: Val       | ETHGHVADLAALCSEAAALQAIR            | b                        |
| IP100022774       | Transitional endoplasmic reticulum ATPase (TER ATPase) (15S Mg(2+)-ATPase p97 subunit) (Valosin containing protein) (VCP) [Contains: Val       | LADDVLEQVANETHGHVADLAALCSEAAALQAIR | b                        |
| IP100022774       | Transitional endoplasmic reticulum ATPase (TER ATPase) (15S Mg(2+)-ATPase p97 subunit) (Valosin containing protein) (VCP) [Contains: Val       | QAAPCVLFFDELDSIAK                  | b                        |
| IP100289708       | Transmembrane protein 10                                                                                                                       | SSEAMEESDRPCISEIDNPK               | b                        |
| IP100855916       | Transhyretin                                                                                                                                   | EEEFVEGVYK                         | g                        |
| IP100855916       | Transhyretin                                                                                                                                   | EEFVEGVYK                          | g                        |
| IP100855916       | Transhyretin                                                                                                                                   | HEHAEVVFTTEEFVEGVYK                | g                        |
| IP100855916       | Transhyretin; TTR Transhyretin precursor                                                                                                       | TSESGELHGL                         | c                        |
| IP100031522       | Trifunctional enzyme alpha subunit, mitochondrial precursor (TP-alpha) (78 kDa gastrin-binding protein) [Includes: Long-chain enoyl-CoA hydrat | ALMGLYHQVLCCK                      | b                        |
| IP100031522       | Trifunctional enzyme alpha subunit, mitochondrial precursor (TP-alpha) (78 kDa gastrin-binding protein) [Includes: Long-chain enoyl-CoA hydrat | EVEAVDPHICFASNTSALPISEIAAVSK       | b                        |
| IP100031522       | Trifunctional enzyme alpha subunit, mitochondrial precursor (TP-alpha) (78 kDa gastrin-binding protein) [Includes: Long-chain enoyl-CoA hydrat | QFTPCQLLADHANSFNK                  | b                        |
| IP100910066       | TRIM2 tripartite motif-containing protein 2 isoform 1; TRIM2 Tripartite motif-containing protein 2                                             | SADVSPTEGVK                        | b                        |
| IP100153011       | Tripartite motif protein 2                                                                                                                     | DKDGLCK                            | b                        |
| IP100153011       | Tripartite motif protein 2                                                                                                                     | SCSNFTAQALNHGTETEVLLVK             | b                        |
| IP100479185       | Tropomyosin 3                                                                                                                                  | AADESER                            | d                        |
| IP100925034       | TRRAP Uncharacterized protein; TRRAP Isoform 2 of Transformation/transcription domain-associated protein; TRRAP Isoform 1 of Transformat       | EDSETRTHSIPRGSLSK                  | b                        |
| IP100176427       | TSLC1-like 2                                                                                                                                   | KDDGHCIEAQNALPSGHSK                | b                        |
| IP100015872       | TSPAN8 Tetraspanin-8                                                                                                                           | IVNETLYENTK                        | f; g                     |
| IP100759542       | TIN Isoform 8 of Titin                                                                                                                         | AAALVVEEDLR                        | g                        |
| IP100759542       | TIN Isoform 8 of Titin                                                                                                                         | NGTEILK                            | g                        |
| IP100876857       | TTYH3 Isoform 2 of Protein tweety homolog 3; TTYH3 Isoform 1 of Protein tweety homolog 3                                                       | VVDTAVGLNHTAEPSSLQTLER             | f                        |
| IP100027107       | Tu translation elongation factor, mitochondrial precursor                                                                                      | KGDECELLGHSK                       | b                        |
| IP100180675       | TUBA1A Tubulin alpha-1A chain                                                                                                                  | GGDDSFNTFFSETGAGK                  | f; g                     |
| IP100180675       | TUBA1A Tubulin alpha-1A chain                                                                                                                  | RQLFHPEQLITGK                      | f                        |
| IP100180675       | TUBA1A Tubulin alpha-1A chain                                                                                                                  | TFNFSETGAGK                        | f; g                     |
| IP100180675       | TUBA1A Tubulin alpha-1A chain                                                                                                                  | VGINYQPTTVVPGDLAKVQR               | f; g                     |
| IP100792677       | TUBA1B 46 kDa protein; TUBA1B Tubulin alpha-1B chain                                                                                           | IHFPLAT                            | f                        |
| IP100792677       | TUBA1B 46 kDa protein; TUBA1B Tubulin alpha-1B chain                                                                                           | NLDIERPT                           | f                        |
| IP100792677       | TUBA1B 46 kDa protein; TUBA1B Tubulin alpha-1B chain                                                                                           | QLFHPEQLITGKEDAANN                 | f                        |
| IP10013475        | TUBB2A Tubulin beta-2A chain                                                                                                                   | SIDNEALYDICFR                      | f; g                     |
| IP100031370       | TUBB2B Tubulin beta-2B chain; TUBB2A Tubulin beta-2A chain                                                                                     | EGAEVLDSVLDVVR                     | f; g                     |
| IP100031370       | TUBB2B Tubulin beta-2B chain; TUBB2A Tubulin beta-2A chain                                                                                     | TEGAELVDSVLDVVR                    | f; g                     |
| IP100007752       | TUBB2C Tubulin beta-2C chain                                                                                                                   | LAVNMVPPFR                         | c; d; e; f; g            |
| IP100023598       | TUBB4 Tubulin beta-4 chain                                                                                                                     | EGAEVLDAVLDVVR                     | f; g                     |
| IP100023598       | TUBB4 Tubulin beta-4 chain                                                                                                                     | INVYNEATGGN                        | f; g                     |
| IP100023598       | TUBB4 Tubulin beta-4 chain                                                                                                                     | TEGAELVDAVLDVVR                    | f; g                     |
| IP100647682       | TUBB6 similar to tubulin, beta 6                                                                                                               | GHYTEGAELVDAVLDVVR                 | d; f; g                  |
| IP100218343       | Tubulin alpha-6 chain                                                                                                                          | KLADQCTGLQGF                       | b                        |
| IP100216005       | Tubulin alpha-8 chain                                                                                                                          | AYHEQLSVAETSSCFEPNSQMKV            | b                        |
| IP100216005       | Tubulin alpha-8 chain                                                                                                                          | RTIQFVDCWPTGFK                     | b                        |
| IP100216005       | Tubulin alpha-8 chain                                                                                                                          | YMACCMLYR                          | b                        |
| IP100007752       | Tubulin beta-2 chain, Tubulin beta-5 chain, Hypothetical protein, Tubulin beta-5 chain                                                         | EAESCDCLQGFQLTHSLGGGTGSGMGLLISK    | b                        |
| IP100007752       | Tubulin beta-2 chain, Tubulin beta-5 chain, Hypothetical protein, Tubulin beta-5 chain                                                         | KEAESCDCLQGFQLTH                   | b                        |
| IP100007752       | Tubulin beta-2 chain, Tubulin beta-5 chain, Hypothetical protein, Tubulin beta-5 chain                                                         | KEAESCDCLQGFQLTHSLGGGTGSGMGLLISK   | b                        |
| IP100031370       | Tubulin, beta polypeptide, Beta tubulin (Tubulin, beta polypeptide) (D140E16.7.1) (Novel protein similar to tubulin beta polypeptide           | ESESCDCLQGFQLTHSLGGGTGSGMGLLISK    | b                        |
| IP100031370       | Tubulin, beta polypeptide, Beta tubulin (Tubulin, beta polypeptide) (D140E16.7.1) (Novel protein similar to tubulin beta polypeptide           | KESESCDCLQGFQLTHSLGGGTGSGMGLLISK   | b                        |
| IP100383670       | Tumor protein D53                                                                                                                              | TKEELQC                            | b                        |
| IP100030887       | TYRO3 Tyrosine-protein kinase receptor TYRO3 precursor                                                                                         | DLVPAIYNSLR                        | f; g                     |
| IP100296022       | Ubiquinol-cytochrome C reductase complex 11 kDa protein, mitochondrial precursor                                                               | DHCVAHK                            | b                        |
| IP100296022       | Ubiquinol-cytochrome C reductase complex 11 kDa protein, mitochondrial precursor                                                               | ERLELCDER                          | b                        |
| IP100296022       | Ubiquinol-cytochrome C reductase complex 11 kDa protein, mitochondrial precursor                                                               | LELCDER                            | b                        |
| IP100296022       | Ubiquinol-cytochrome C reductase complex 11 kDa protein, mitochondrial precursor                                                               | SHTTEEDCTEELDFLHAR                 | b                        |
| IP100013847       | Ubiquinol-cytochrome C reductase complex core protein I, mitochondrial precursor                                                               | AIGHYDCTYGGVHSSPLASGAVANK          | b                        |
| IP100013847       | Ubiquinol-cytochrome C reductase complex core protein I, mitochondrial precursor                                                               | SICYAETGLLGAHFVCDR                 | b                        |
| IP100026119       | Ubiquitin-activating enzyme E1                                                                                                                 | CVYYR                              | b                        |
| IP100026119       | Ubiquitin-activating enzyme E1                                                                                                                 | IIPAIAITTAAVVGLVLELYK              | b                        |
| IP100026119       | Ubiquitin-activating enzyme E1                                                                                                                 | VGEFCHNR                           | b                        |
| IP100026119       | Ubiquitin-activating enzyme E1                                                                                                                 | YFLVGAGAGCELLK                     | b                        |
| IP100024466       | UGCG1 UDP-glucose ceramide glucosyltransferase-like 1 isoform 1                                                                                | GTEVNTTIVIGENDPDEVQGLFGK           | f; g                     |
| IP100294455       | UGT8 2-hydroxyacylphosphingine 1-beta-galactosyltransferase precursor                                                                          | YPGIFNSTSDAFLQSK                   | f; g                     |
| IP100470896       | UNC5D Isoform 1 of Netrin receptor UNC5D precursor                                                                                             | EVFINVTR                           | f                        |
| IP100020510       | Uncharacterized hematopoietic stem/progenitor cells protein MDS029                                                                             | FPFCDGAHTK                         | b                        |
| IP100020510       | Uncharacterized hematopoietic stem/progenitor cells protein MDS029                                                                             | KFPFCDGAHTK                        | b                        |
| IP100294536       | UNR-interacting protein                                                                                                                        | CVLPEEDSGELAKPK                    | b                        |
| IP100294536       | UNR-interacting protein                                                                                                                        | GHFPHICVR                          | b                        |
| IP100297289       | USP31 Isoform 1 of Ubiquitin carboxyl-terminal hydrolase 31                                                                                    | IVLLVLCNRACTGQQGK                  | g                        |
| IP100423563       | USP6 Isoform 2 of Ubiquitin carboxyl-terminal hydrolase 6                                                                                      | NSSPNSSPR                          | g                        |
| IP100064721       | USP7 Ubiquitin carboxyl-terminal hydrolase; USP7 Ubiquitin carboxyl-terminal hydrolase 7                                                       | HQVINEDEYEVNLIK                    | g                        |
| IP100034159       | Vacuolar ATP synthase subunit b                                                                                                                | LFPHGGR                            | b                        |
| IP100034159       | Vacuolar ATP synthase subunit d                                                                                                                | LKQECCR                            | b                        |
| IP100018931       | Vacuolar protein sorting 35                                                                                                                    | ACAELHQNVYK                        | b                        |
| IP100004022       | Vacuolar proton translocating ATPase 116 kDa subunit a isoform 1                                                                               | RCEEMDR                            | b                        |
| IP100215631       | VCAN Isoform Vint of Versican core protein precursor                                                                                           | VSLPCHF                            | f; g                     |
| IP100215631       | VCAN Isoform Vint of Versican core protein precursor; VCAN Isoform V0 of Versican core protein precursor                                       | FENQTGFPPPPDR                      | f; g                     |
| IP100215631       | VCAN Isoform Vint of Versican core protein precursor; VCAN Isoform V0 of Versican core protein precursor                                       | TLYRFENQTGFPPPPDR                  | f; g                     |
| IP100170692       | Vesicle-associated membrane protein-associated protein A,                                                                                      | KVCFK                              | b                        |
| IP100006451       | Vesicle-fusing ATPase                                                                                                                          | AAQSTAMNR                          | e                        |
| IP100026015       | Vesicular inhibitory amino acid transporter                                                                                                    | AEGEPCDEGAEAPVEGDHYQR              | b; e                     |
| IP100479404       | VPS13D-1A protein                                                                                                                              | AAIEGQTVRDQAQRCSR                  | a                        |
| IP100298971       | VTN Vitronectin precursor                                                                                                                      | EQVGGPSLISDLQAQSK                  | g                        |



| IPI Accession No.                                                                                                                                                                                                             | Protein Description                                                                                          | Peptide Sequence*           | Primary Source Dataset** |
|-------------------------------------------------------------------------------------------------------------------------------------------------------------------------------------------------------------------------------|--------------------------------------------------------------------------------------------------------------|-----------------------------|--------------------------|
| IP10029871                                                                                                                                                                                                                    | VTN Vitronectin precursor                                                                                    | NGSLFAFR                    | g                        |
| IP10029871                                                                                                                                                                                                                    | VTN Vitronectin precursor                                                                                    | NISDGFDFIPDNVDAALALPAHSYSGR | f                        |
| IP10029871                                                                                                                                                                                                                    | VTN Vitronectin precursor                                                                                    | NNATVHEQVGGPSLSDLQAQSK      | g                        |
| IP100023007                                                                                                                                                                                                                   | Wiskott-Aldrich syndrome protein family member 1                                                             | HLCHTALPR                   | b                        |
| IP100011457                                                                                                                                                                                                                   | WUGSC:H_RG054D04.1 protein, similar to 60S ribosomal protein L7, similar to 60S ribosomal protein L7.60S rib | YGIICMEDLIEIYTVGK           | b                        |
| IP100000816                                                                                                                                                                                                                   | YWHAE 14-3-3 protein epsilon                                                                                 | MDDREDLVYQAK                | g                        |
| IP100027967                                                                                                                                                                                                                   | Zinc finger protein 500                                                                                      | LFCYQEVAGPR                 | b                        |
| IP100027967                                                                                                                                                                                                                   | Zinc finger protein 500                                                                                      | CTPLGSSAPALA                | b                        |
| IP100479144                                                                                                                                                                                                                   | ZNF208 Zinc finger protein 208                                                                               | AFNQSAILTK                  | g                        |
| IP100413365                                                                                                                                                                                                                   | ZNF318 Isoform 1 of Zinc finger protein 318                                                                  | QPNLLMIDK                   | f; g                     |
| IP100328713                                                                                                                                                                                                                   | ZNF546 Zinc finger protein 546                                                                               | LQTELTR                     | f; g                     |
| <b>NOTE:</b>                                                                                                                                                                                                                  |                                                                                                              |                             |                          |
| * <b>Red</b> : upregulated (expression level >1.2) as determined by iTRAQ/iCAT.                                                                                                                                               |                                                                                                              |                             |                          |
| * <b>Black</b> : down-regulated (expression level < 0.83) as determined by iTRAQ/iCAT.                                                                                                                                        |                                                                                                              |                             |                          |
| ** <b>Source Datasets:</b>                                                                                                                                                                                                    |                                                                                                              |                             |                          |
| a. Human CSF general profiling, iTRAQ on MALDI-TOF/TOF <sup>1</sup> ;                                                                                                                                                         |                                                                                                              |                             |                          |
| b. Human midbrain (SN) general profiling, ICAT on LTQ <sup>2</sup> ;                                                                                                                                                          |                                                                                                              |                             |                          |
| c. Human midbrain (SN) general profiling, iTRAQ on MALDI-TOF/TOF <sup>2</sup> ;                                                                                                                                               |                                                                                                              |                             |                          |
| d. Human frontal cortex general profiling - cytosolic, mitochondrial, nuclear fractions, iTRAQ on MALDI-TOF/TOF <sup>3</sup> ;                                                                                                |                                                                                                              |                             |                          |
| e. Human frontal cortex general profiling - synaptosomal fraction, iTRAQ on MALDI-TOF/TOF <sup>4</sup> ;                                                                                                                      |                                                                                                              |                             |                          |
| f. Human frontal cortex glycoprotein profiling, iTRAQ on MALDI-TOF/TOF <sup>2</sup> ;                                                                                                                                         |                                                                                                              |                             |                          |
| g. Human CSF glycoprotein profiling, iTRAQ on MALDI-TOF/TOF <sup>2</sup> ;                                                                                                                                                    |                                                                                                              |                             |                          |
| h. Human frontal cortex phosphoprotein profiling, iTRAQ on MALDI-TOF/TOF and LTQ-Orbitrap <sup>5</sup> ;                                                                                                                      |                                                                                                              |                             |                          |
| i. Monkey putamen glycoprotein and non-glycoprotein profiling, iTRAQ on MALDI-TOF/TOF and LTQ-Orbitrap <sup>6</sup> ;                                                                                                         |                                                                                                              |                             |                          |
| j. Monkey putamen phosphoprotein profiling, iTRAQ on MALDI-TOF/TOF and LTQ-Orbitrap <sup>6</sup> ;                                                                                                                            |                                                                                                              |                             |                          |
| For proteins identified in more than one dataset, only the primary datasets are shown.                                                                                                                                        |                                                                                                              |                             |                          |
| <b>References:</b>                                                                                                                                                                                                            |                                                                                                              |                             |                          |
| 1. Abdi F, Quinn JF, Jankovic J, et al. Detection of biomarkers with a multiplex quantitative proteomic platform in cerebrospinal fluid of patients with neurodegenerative disorders. <i>J Alzheimers Dis</i> 2006;9:293-348. |                                                                                                              |                             |                          |
| 2. Jin J, Hulette C, Wang Y, et al. Proteomic identification of a stress protein, mortalin/mthsp70/GRP75: relevance to Parkinson disease. <i>Mol Cell Proteomics</i> 2006;5:1193-1204.                                        |                                                                                                              |                             |                          |
| 3. Kitsou E, Pan S, Zhang J, et al. Identification of proteins in human substantia nigra. <i>Proteomics Clin Appl</i> 2008;2:776-782.                                                                                         |                                                                                                              |                             |                          |
| 4. Pan S, Shi M, Jin J, et al. Proteomics identification of proteins in human cortex using multidimensional separations and MALDI tandem mass spectrometer. <i>Mol Cell Proteomics</i> 2007;6:1818-1823.                      |                                                                                                              |                             |                          |
| 5. Shi M, Jin J, Wang Y, et al. Mortalin: a protein associated with progression of Parkinson disease? <i>J Neuropathol Exp Neurol</i> 2008;67:117-124.                                                                        |                                                                                                              |                             |                          |
| 6. Shi M, Bradner J, Bammler TK, et al. Identification of glutathione S-transferase pi as a protein involved in Parkinson disease progression. <i>Am J Pathol</i> 2009;175:54-65.                                             |                                                                                                              |                             |                          |
| 7. Hwang H, Zhang J, Chung KA, et al. Glycoproteomics in neurodegenerative diseases. <i>Mass Spectrom Rev</i> 2010;29:79-125.                                                                                                 |                                                                                                              |                             |                          |
| 8. Unpublished data.                                                                                                                                                                                                          |                                                                                                              |                             |                          |
