# Supplementary material
Source: PubMed Central journal article supplement (PMC4349976)
Supplement: supp_M114.040576_mcp.M114.040576-3.pdf [file supp_M114.040576_mcp.M114.040576-3.pdf]

Suppl Table 2, CSF-observable peptides

| IPI Accession No. | Protein Description                                     | Peptide Sequence            |
|-------------------|---------------------------------------------------------|-----------------------------|
| IPI00000012       | Zinc transporter 10                                     | GYQDASTKIR                  |
| IPI00000816       | 14-3-3 protein epsilon                                  | LICCDILDVLDK                |
| IPI00000816       | 14-3-3 protein epsilon                                  | AAFDDAIAELDTLSEESYK         |
| IPI00000828       | Proenkephalin A precursor                               | LVRPADINFLACVMECEGK         |
| IPI00000828       | Proenkephalin-A                                         | FAEALPSDEEGESYSK            |
| IPI00000832       | Proenkephalin-B                                         | SVGEGPYSELAK                |
| IPI00000877       | Hypoxia up-regulated protein 1 precursor                | LPATEKPVLLSK                |
| IPI00000877       | Hypoxia up-regulated protein 1 precursor                | LCQGLFFR                    |
| IPI00001662       | Opioid-binding protein/cell adhesion molecule precursor | LATGLDGMR                   |
| IPI00001662       | Opioid-binding protein/cell adhesion molecule precursor | ITVNYPPIYSK                 |
| IPI00001662       | Opioid-binding protein/cell adhesion molecule precursor | DQSGEYECSALNDVAAPDVR        |
| IPI00001662       | Opioid-binding protein/cell adhesion molecule precursor | EGQGFVSEDEYLEISDIKR         |
| IPI00001662       | Opioid-binding protein/cell adhesion molecule precursor | GILSCEASAVPMAEFQWFK         |
| IPI00001663       | Serine protease HTRA2, mitochondrial                    | EPLPTLPLGR                  |
| IPI00001952       | Probable endonuclease KIAA0830                          | LLPFNPQLFQNNCGETEQDTEK      |
| IPI00001952       | Probable endonuclease KIAA0830                          | QALNTDYLDSDYQR              |
| IPI00001952       | Probable endonuclease KIAA0830                          | ALTPQCGSGEDLYILGTVPSPDYR    |
| IPI00001952       | Probable endonuclease KIAA0830                          | DRIPVYSAFR                  |
| IPI00001952       | Probable endonuclease KIAA0830                          | ILEVVNIQIIDEER              |
| IPI00001952       | Probable endonuclease KIAA0830                          | FATLYSTR                    |
| IPI00002280       | ProSAAS precursor                                       | ILAGSADSEGVAAPR             |
| IPI00002280       | ProSAAS precursor                                       | GEAAGAVQELAR                |
| IPI00002280       | ProSAAS precursor                                       | LDPAALAAQLVPAPVPAALR        |
| IPI00002280       | ProSAAS precursor                                       | GLSAASPPLAETGAPR            |
| IPI00002714       | DKK3 Dickkopf-related protein 3 precursor               | DQDGEILLPR                  |
| IPI00002714       | DKK3 Dickkopf-related protein 3 precursor               | SAVEEMEAEAAAAK              |
| IPI00002714       | DKK3 Dickkopf-related protein 3 precursor               | EVEELMEDTQHK                |
| IPI00002714       | DKK3 Dickkopf-related protein 3 precursor               | LLDLITWELEPDGALDR           |
| IPI00002714       | DKK3 Dickkopf-related protein 3 precursor               | DCQPGLCCAFQR                |
| IPI00002714       | DKK3 Dickkopf-related protein 3 precursor               | DSECCGDLQCVWGHCTK           |
| IPI00002714       | DKK3 Dickkopf-related protein 3 precursor               | EVPDEYEVGSFMEEVR            |
| IPI00002714       | DKK3 Dickkopf-related protein 3 precursor               | GLLFPVCTPLPVEGELCHD         |
| IPI00003351       | Extracellular matrix protein 1 precursor                | EVGPPLPQEAVPLQK             |
| IPI00003351       | Extracellular matrix protein 1 precursor                | FCEAEFSVK                   |
| IPI00003351       | Extracellular matrix protein 1 precursor                | QGETLNFLEIGYSR              |
| IPI00003351       | Extracellular matrix protein 1 precursor                | ELPSLQHPNEQK                |
| IPI00003351       | Extracellular matrix protein 1 precursor                | AWEDTLDKYCDREYAVK           |
| IPI00003351       | Extracellular matrix protein 1 precursor                | VTPNLMGHLGQNQR              |
| IPI00003362       | HSPA5, 78 kDa glucose-regulated protein                 | NQLTSNPENTVFDKAK            |
| IPI00003362       | HSPA5, 78 kDa glucose-regulated protein                 | ITPSYVAFTPEGER              |
| IPI00003362       | HSPA5, 78 kDa glucose-regulated protein                 | LYGSAGPPPTGEEDTAEKDEL       |
| IPI00003362       | HSPA5, 78 kDa glucose-regulated protein                 | ELEEIVQPIISK                |
| IPI00003362       | HSPA5, 78 kDa glucose-regulated protein                 | VTHAVVTVPAYFNDAQR           |
| IPI00003590       | Quiescin                                                | AHFSPSNIILDFPAAGSAAR        |
| IPI00003590       | Quiescin                                                | SALYSPSDPLTLLQADTVR         |
| IPI00003590       | Quiescin                                                | LAGAPSEDQPFPK               |
| IPI00003590       | Quiescin                                                | NNEEYLALIFEK                |
| IPI00003590       | Quiescin                                                | SFYTAYLQR                   |
| IPI00003590       | Quiescin                                                | EVALDLSQHK                  |
| IPI00003590       | Quiescin                                                | VGSPNAAVLWLVSSHNR           |
| IPI00003813       | Cell adhesion molecule 1                                | SDDSVIQLLNPNR               |
| IPI00003813       | Cell adhesion molecule 1                                | VHKEDDGVPVICQVEHPAVTGNLQTQR |
| IPI00003815       | Rho GDP dissociation inhibitor (GDI) alpha              | SIQEIQLDKDDESLRK            |
| IPI00003842       | Isoform 1 of Microtubule-associated protein 2           | DTFTPSGQEPILTEK             |

| IPI Accession No. | Protein Description                                  | Peptide Sequence                |
|-------------------|------------------------------------------------------|---------------------------------|
| IPI00003842       | Isoform 1 of Microtubule-associated protein 2        | VLEEEKEAINQETVQQR               |
| IPI00003865       | Isoform 1 of Heat shock cognate 71 kDa protein       | TTPSYVAFTDTER                   |
| IPI00003919       | Isoform 1 of Glutaminy-peptide cyclotransferase      | SFSNIISTLNPTAK                  |
| IPI00003919       | Isoform 1 of Glutaminy-peptide cyclotransferase      | YFQNYSYGGVIQDDHIPFLR            |
| IPI00004317       | DNA polymerase subunit gamma-1                       | LMALTWDFGFLHYSER                |
| IPI00004413       | Tumor necrosis factor receptor                       | AYTDCLSQNLVVIKPGTK              |
| IPI00004656       | Beta-2-microglobulin precursor                       | VEHSDLSFSK                      |
| IPI00004656       | Beta-2-microglobulin precursor                       | IEKVEHSDLSFSK                   |
| IPI00004656       | Beta-2-microglobulin precursor                       | SNFLNCY                         |
| IPI00004656       | Beta-2-microglobulin precursor                       | SNFLNCYVSGFHPSDIEVDLLK          |
| IPI00004656       | Beta-2-microglobulin precursor                       | VNHVTLSQPK                      |
| IPI00005292       | Testican-1 precursor                                 | FDSILPICK                       |
| IPI00006114       | SERPINF1 Pigment epithelium-derived factor precursor | LAAAVSNFGYDLYR                  |
| IPI00006114       | SERPINF1 Pigment epithelium-derived factor precursor | LQSLFDSPDFSK                    |
| IPI00006114       | SERPINF1 Pigment epithelium-derived factor precursor | DTDTGALLFIGK                    |
| IPI00006114       | SERPINF1 Pigment epithelium-derived factor precursor | ALYYDLISSPDIHGTYK               |
| IPI00006114       | SERPINF1 Pigment epithelium-derived factor precursor | YGLSDLSCK                       |
| IPI00006114       | SERPINF1 Pigment epithelium-derived factor precursor | TVQAVLTVPK                      |
| IPI00006114       | SERPINF1 Pigment epithelium-derived factor precursor | KTSLEDFYLDEER                   |
| IPI00006114       | SERPINF1 Pigment epithelium-derived factor precursor | LDLQEINNWVQAQMK                 |
| IPI00006114       | SERPINF1 Pigment epithelium-derived factor precursor | EIPDEISILLGVAHFK                |
| IPI00006114       | SERPINF1 Pigment epithelium-derived factor precursor | TSLEDFYLDEER                    |
| IPI00006114       | SERPINF1 Pigment epithelium-derived factor precursor | SSTSPTTNVLLSPLSVATALSALSGLGAEQR |
| IPI00006146       | Serum amyloid A1                                     | RGPGGAWAAEVISNAR                |
| IPI00006146       | Serum amyloid A1                                     | EANYIGSDKYFHAR                  |
| IPI00006166       | Prosaposin receptor GPR37                            | TVPGASDLFYWPR                   |
| IPI00006166       | Prosaposin receptor GPR37                            | GNPTALQLFLQISEEEEEKGR           |
| IPI00006601       | Secretogranin I precursor                            | GEAGAPGEEDIQGTK                 |
| IPI00006601       | Secretogranin I precursor                            | GYPGVQAPEDLEWER                 |
| IPI00006601       | Secretogranin I precursor                            | NYLNYGEEGAPGK                   |
| IPI00006601       | Secretogranin I precursor                            | ELENLAAMDLELQK                  |
| IPI00006601       | Secretogranin I precursor                            | ADEPQWSLYPSDSQVSEEVK            |
| IPI00006601       | Secretogranin I precursor                            | MAHGYGEESEEEERGLEPGK            |
| IPI00006601       | Secretogranin I precursor                            | HLEEPGETQNAFLNER                |
| IPI00006601       | Secretogranin I precursor                            | EDEEEEGENYQKGER                 |
| IPI00006601       | Secretogranin I precursor                            | SQEESEEGEEDATSEVDK              |
| IPI00006608       | Amyloid beta A4 protein                              | CLVGEFVSDALLVPDK                |
| IPI00006608       | Amyloid beta A4 protein                              | MDVCETHLHWHTVAK                 |
| IPI00006662       | APOD Apolipoprotein D precursor                      | NPNLPPETVDSLK                   |
| IPI00006662       | APOD Apolipoprotein D precursor                      | CPNPPVQENFDVKN                  |
| IPI00006662       | APOD Apolipoprotein D precursor                      | MTVTDQVNCPK                     |
| IPI00006662       | APOD Apolipoprotein D precursor                      | NILTSNNIDVK                     |
| IPI00006662       | APOD Apolipoprotein D precursor                      | KMTVTDQVNCPK                    |
| IPI00006662       | APOD Apolipoprotein D precursor                      | IPTTFENGR                       |
| IPI00006662       | APOD Apolipoprotein D precursor                      | NILTSNNIDVKK                    |
| IPI00006662       | APOD Apolipoprotein D precursor                      | CPNPPVQENFDVKNKYLGR             |
| IPI00006662       | APOD Apolipoprotein D precursor                      | WYEIEKIPTTFENGR                 |
| IPI00007221       | SERPINA5 Plasma serine protease inhibitor precursor  | TLYLADTFPTNFR                   |
| IPI00007221       | SERPINA5 Plasma serine protease inhibitor precursor  | AAAATGTIFTFR                    |
| IPI00007221       | SERPINA5 Plasma serine protease inhibitor precursor  | DFTFDLYR                        |
| IPI00007221       | SERPINA5 Plasma serine protease inhibitor precursor  | GFQQLLQELNQPR                   |
| IPI00007257       | Isoform 2 of Calsyntenin-1 (Fragment)                | AASEFESSEGVFLFPELR              |
| IPI00007257       | Isoform 2 of Calsyntenin-1 (Fragment)                | ISIKPTCTPGWQGWNNR               |
| IPI00007257       | Isoform 2 of Calsyntenin-1 (Fragment)                | EGLDLQVLEDSGR                   |
| IPI00007257       | Isoform 2 of Calsyntenin-1 (Fragment)                | FAGEICGFK                       |

| IPI Accession No. | Protein Description                                                  | Peptide Sequence                |
|-------------------|----------------------------------------------------------------------|---------------------------------|
| IPI00007257       | Isoform 2 of Calsyntenin-1 (Fragment)                                | VEAVDADCSPQFSQICSYEIITPDVPFTVDK |
| IPI00007257       | Isoform 2 of Calsyntenin-1 (Fragment)                                | LTVTAYDCGK                      |
| IPI00007257       | Isoform 2 of Calsyntenin-1 (Fragment)                                | ATVHIQVNDVNEYAPVFK              |
| IPI00007257       | Isoform 2 of Calsyntenin-1 (Fragment)                                | ETILCSSDKTDMNR                  |
| IPI00007921       | Isoform 1 of Neurexin-2-alpha                                        | FTLSCAEPATLQLDTPVADDR           |
| IPI00007921       | Isoform 1 of Neurexin-2-alpha                                        | LGERPPALLGSQGLR                 |
| IPI00007921       | Isoform 1 of Neurexin-2-alpha                                        | WAGAASSGELSFSLR                 |
| IPI00008274       | Adenylate cyclase-associated protein 1                               | AGAAPYVQAFDSSLAGPVAEYLK         |
| IPI00008318       | Ephrin type-A receptor 4                                             | VYPANEVTLLEDSR                  |
| IPI00008318       | Ephrin type-A receptor 4                                             | ETFNLYYESDNDKER                 |
| IPI00008318       | Ephrin type-A receptor 4                                             | NLAQFPDITITGADTSSLVEVR          |
| IPI00008318       | Ephrin type-A receptor 4                                             | IDTIAADESFTQVDIGDR              |
| IPI00008318       | Ephrin type-A receptor 4                                             | DCNSLPGVMGTCK                   |
| IPI00008318       | Ephrin type-A receptor 4                                             | GLNPLTSYVFHVR                   |
| IPI00008318       | Ephrin type-A receptor 4                                             | YNPNPDQSVSVTVTTNQAAPSSIALVQAK   |
| IPI00008944       | Isoform 1 of Neuroendocrine protein 7B2 precursor                    | DFSEDQGYDPNPNPCPVGK             |
| IPI00008944       | Isoform 1 of Neuroendocrine protein 7B2 precursor                    | SVPHFSDEDDKDE                   |
| IPI00008944       | Isoform 1 of Neuroendocrine protein 7B2 precursor                    | EFQLHQHLFDPEHDYPGLGK            |
| IPI00009028       | Tetranectin precursor                                                | LDTLAQEVALLK                    |
| IPI00009028       | Tetranectin precursor                                                | GGTLGTPQTGSENDALYEYLR           |
| IPI00009028       | Tetranectin precursor                                                | NWETEITAQPDGGK                  |
| IPI00009028       | Tetranectin precursor                                                | TFHEASEDCISR                    |
| IPI00009028       | Tetranectin precursor                                                | CFLAFTQTK                       |
| IPI00009028       | Tetranectin precursor                                                | EQQALQTVCLK                     |
| IPI00009362       | Secretogranin II precursor                                           | QYWDEDLMLK                      |
| IPI00009362       | Secretogranin II precursor                                           | VLEYLNQEK                       |
| IPI00009362       | Secretogranin II precursor                                           | TNEIVEEQYTPQSLATLESVQELGK       |
| IPI00009362       | Secretogranin II precursor                                           | ANNIAYEDVVGEDWNPVEEK            |
| IPI00009362       | Secretogranin II precursor                                           | SGQLGIQEEDLR                    |
| IPI00009362       | Secretogranin II precursor                                           | LENVQKFPSPMIR                   |
| IPI00009619       | Isoform 2 of Cell adhesion molecule 3 precursor                      | SLVTVLGIPQKPIITGYK              |
| IPI00009619       | Isoform 2 of Cell adhesion molecule 3 precursor                      | EDDGASIVCSVNHESLK               |
| IPI00009619       | Isoform 2 of Cell adhesion molecule 3 precursor                      | SDSGTYGCTATSNMGSYK              |
| IPI00009802       | Versican core protein                                                | LATVGELQAAWR                    |
| IPI00009802       | Versican core protein                                                | LQGAHLTSILSHEEQMFVNR            |
| IPI00009866       | Isoform 1 of Keratin, type I cytoskeletal 13                         | ALEEANADLEVK                    |
| IPI00009866       | Isoform 1 of Keratin, type I cytoskeletal 13                         | AGLENTVAETECR                   |
| IPI00009866       | Isoform 1 of Keratin, type I cytoskeletal 13                         | TRLEQEIATYR                     |
| IPI00009866       | Isoform 1 of Keratin, type I cytoskeletal 13                         | EVSTNTAMIQTSK                   |
| IPI00009890       | Glia-derived nexin precursor                                         | FTAVAQTDLKEPLK                  |
| IPI00009997       | N-acetyllactosaminide                                                | TALASGGVLDASGDYR                |
| IPI00009997       | N-acetyllactosaminide                                                | WEGPLSVSVFAATK                  |
| IPI00009997       | N-acetyllactosaminide                                                | YEAAVPDPR                       |
| IPI00009997       | N-acetyllactosaminide                                                | NELVQLYQVGEVRRPF                |
| IPI00009997       | N-acetyllactosaminide                                                | EMLDQSNQWGGTALVVPFAFEIR         |
| IPI00009997       | N-acetyllactosaminide                                                | VAMHLVCPSR                      |
| IPI00009997       | N-acetyllactosaminide                                                | YEAAVPDPREPGEFALLR              |
| IPI00010130       | Glutamine synthetase                                                 | LTGFHETSNINDFSAGVANR            |
| IPI00010154       | Rab GDP dissociation inhibitor alpha                                 | SPYLYPLYGLGELPQGFAR             |
| IPI00011217       | NADH dehydrogenase [ubiquinone] iron-sulfur protein 4, mitochondrial | NGWSYDIEERK                     |
| IPI00011218       | CSF1R Macrophage colony-stimulating factor 1 receptor precursor      | VIPGPPALTLVPAELVR               |
| IPI00011218       | CSF1R Macrophage colony-stimulating factor 1 receptor precursor      | CTEPGDPLGGSAIHLVYK              |
| IPI00011218       | CSF1R Macrophage colony-stimulating factor 1 receptor precursor      | HTFTLSLPR                       |
| IPI00011218       | CSF1R Macrophage colony-stimulating factor 1 receptor precursor      | HSTSMFFR                        |
| IPI00011229       | Cathepsin D precursor                                                | YSQAVPAVTEGPIPEVLK              |

| IPI Accession No. | Protein Description                                       | Peptide Sequence              |
|-------------------|-----------------------------------------------------------|-------------------------------|
| IPI00011229       | Cathepsin D precursor                                     | VSTLPAILTK                    |
| IPI00011229       | Cathepsin D precursor                                     | FDGILGMAYPR                   |
| IPI00011229       | Cathepsin D precursor                                     | DPDAQPGGELMLGGTDSK            |
| IPI00011229       | Cathepsin D precursor                                     | ISVNNVLPVFDNLMQK              |
| IPI00011229       | Cathepsin D precursor                                     | LVDQNIFSFYLSR                 |
| IPI00011229       | Cathepsin D precursor                                     | TMSEVGGSVEDLIAK               |
| IPI00011229       | Cathepsin D precursor                                     | AIGAVPLIQGEYMIPCEK            |
| IPI00011264       | Complement factor H-related protein 1 precursor           | EIMENYNIALR                   |
| IPI00011264       | Complement factor H-related protein 1 precursor           | ITCTEEGWSPTPK                 |
| IPI00011264       | Complement factor H-related protein 1 precursor           | TTCWDGKLEYPTCAK               |
| IPI00011264       | Complement factor H-related protein 1 precursor           | INHGILYDEEK                   |
| IPI00011264       | Complement factor H-related protein 1 precursor           | STDTSVCVNPPTVQNAHILSR         |
| IPI00011302       | CD59 glycoprotein precursor                               | LRENELTYCYCK                  |
| IPI00011302       | CD59 glycoprotein precursor                               | FEHCNFDVTR                    |
| IPI00013179       | PTGDS Prostaglandin-H2 D-isomerase precursor              | TMLLQPAGSLGSYSYR              |
| IPI00013179       | PTGDS Prostaglandin-H2 D-isomerase precursor              | AQGFTEDTIVFLPQTDK             |
| IPI00013179       | PTGDS Prostaglandin-H2 D-isomerase precursor              | MATLYSR                       |
| IPI00013179       | PTGDS Prostaglandin-H2 D-isomerase precursor              | WFSAGLASNSSWLR                |
| IPI00013179       | PTGDS Prostaglandin-H2 D-isomerase precursor              | SPHWGSTYSVSVVETDYDQYALLYSQGSK |
| IPI00013179       | PTGDS Prostaglandin-H2 D-isomerase precursor              | SVVAPATDGGNLNSTFLR            |
| IPI00013179       | PTGDS Prostaglandin-H2 D-isomerase precursor              | GPGEDFR                       |
| IPI00013303       | LSAMP Limbic system-associated membrane protein precursor | VTVNYPPITITESK                |
| IPI00013303       | LSAMP Limbic system-associated membrane protein precursor | CEASAVPAPDFEWYR               |
| IPI00013303       | LSAMP Limbic system-associated membrane protein precursor | EFEGEEYEILGITR                |
| IPI00013303       | LSAMP Limbic system-associated membrane protein precursor | SGIIFAGHDK                    |
| IPI00013303       | LSAMP Limbic system-associated membrane protein precursor | VDVYDEGSYTCVQTHPEPK           |
| IPI00013475       | Tubulin beta-2A chain                                     | FPGQLNADLR                    |
| IPI00013808       | Alpha-actinin-4                                           | VLAVNQENEHLMEDYEK             |
| IPI00013933       | Splice Isoform 1 Of Desmoplakin                           | TMIQSPSGVILQEAAADVHAR         |
| IPI00013976       | Laminin subunit beta-1                                    | IPSWTGAGFVR                   |
| IPI00013976       | Laminin subunit beta-1                                    | VESLSQVEVILQHSAAADIAR         |
| IPI00014439       | Dihydropteridine reductase                                | NSGMPPGAAAIAPVTLTDPMNR        |
| IPI00014572       | SPARC precursor                                           | YIPPCLDSELETFPLR              |
| IPI00014572       | SPARC precursor                                           | APLIPMEHCTTR                  |
| IPI00014572       | SPARC precursor                                           | TFDSSCHFFATK                  |
| IPI00014572       | SPARC precursor                                           | VCELDEENTPMCVCQDPTSCPAIGEFEK  |
| IPI00014572       | SPARC precursor                                           | NVLVTLYERDEDNLLTEK            |
| IPI00014608       | Fibroblast growth factor 20                               | GGPGAAQLAHLHGILR              |
| IPI00014608       | Fibroblast growth factor 20                               | TGFHLQILPDGVSQGTGR            |
| IPI00015102       | Isoform 1 of CD166 antigen precursor                      | YEKPDGSPVFIADR                |
| IPI00015102       | Isoform 1 of CD166 antigen precursor                      | QIGDALPVSCTISASR              |
| IPI00015102       | Isoform 1 of CD166 antigen precursor                      | ESLTLIVEGKPKIK                |
| IPI00015260       | NELL2 Protein kinase C-binding protein NELL2 precursor    | ASTATAEQFFQK                  |
| IPI00015260       | NELL2 Protein kinase C-binding protein NELL2 precursor    | ALREDNAYCEDIDECAEGR           |
| IPI00015260       | NELL2 Protein kinase C-binding protein NELL2 precursor    | TCLDEMNVVR                    |
| IPI00015260       | NELL2 Protein kinase C-binding protein NELL2 precursor    | GYDFCSER                      |
| IPI00015260       | NELL2 Protein kinase C-binding protein NELL2 precursor    | TCPTCNDFHGLVQK                |
| IPI00015260       | NELL2 Protein kinase C-binding protein NELL2 precursor    | VVEKPSTDLPLGTTFWLQGR          |
| IPI00015260       | NELL2 Protein kinase C-binding protein NELL2 precursor    | YLELESSGHR                    |
| IPI00015260       | NELL2 Protein kinase C-binding protein NELL2 precursor    | HNGQIIVLENDR                  |
| IPI00015260       | NELL2 Protein kinase C-binding protein NELL2 precursor    | EFESWIDGCK                    |
| IPI00015260       | NELL2 Protein kinase C-binding protein NELL2 precursor    | NGHICCSVDPQCLQEL              |
| IPI00015881       | Splice Isoform 1 Of Macrophage colony                     | STCQSFEPPEPVPVK               |
| IPI00015881       | Splice Isoform 1 Of Macrophage colony                     | SHSSGSVLPGLGELEGR             |
| IPI00016150       | SERPINI1 Neuroserpin precursor                            | QEVPLATLEPLVK                 |

| IPI Accession No. | Protein Description                                    | Peptide Sequence        |
|-------------------|--------------------------------------------------------|-------------------------|
| IPI00016150       | SERPINI1 Neuroserpin precursor                         | AQLVEEWANSVK            |
| IPI00016759       | Synaptic vesicular amine transporter                   | DLLNENVQVGLLFASK        |
| IPI00016915       | Insulin-like growth factor-binding protein 7 precursor | AGAAAGGPGVSGVCVCK       |
| IPI00016915       | Insulin-like growth factor-binding protein 7 precursor | GTCEQGPSIVTPPK          |
| IPI00016915       | Insulin-like growth factor-binding protein 7 precursor | TELLPGDRDNLAIQTR        |
| IPI00016915       | Insulin-like growth factor-binding protein 7 precursor | ITVVDALHEIPVK           |
| IPI00016915       | Insulin-like growth factor-binding protein 7 precursor | HEVTGWVVLVSPLSK         |
| IPI00016915       | Insulin-like growth factor-binding protein 7 precursor | SRYPVCGSDGTTYPSCQLR     |
| IPI00016915       | Insulin-like growth factor-binding protein 7 precursor | YPVCGSDGTTYPSCQLR       |
| IPI00017601       | CP Ceruloplasmin precursor                             | DLYSGLIGPLIVCR          |
| IPI00017601       | CP Ceruloplasmin precursor                             | GAYPLSIEPIGVR           |
| IPI00017601       | CP Ceruloplasmin precursor                             | QSEDSTFYLGER            |
| IPI00017601       | CP Ceruloplasmin precursor                             | SGAGTEDSACIPWAYYSTVDQVK |
| IPI00017601       | CP Ceruloplasmin precursor                             | VNKDDEEFIESNK           |
| IPI00017601       | CP Ceruloplasmin precursor                             | NNEGTYYSNPNPQSR         |
| IPI00017601       | CP Ceruloplasmin precursor                             | EVGPTNADPVCLAK          |
| IPI00017601       | CP Ceruloplasmin precursor                             | DIASGLIGPLIICK          |
| IPI00017601       | CP Ceruloplasmin precursor                             | KAEEEHLGILGPQLHADVGDK   |
| IPI00017601       | CP Ceruloplasmin precursor                             | HYIYIHIETTWDYASDHGK     |
| IPI00017601       | CP Ceruloplasmin precursor                             | EYTDASFTNRK             |
| IPI00017601       | CP Ceruloplasmin precursor                             | RQSEDSTFYLGER           |
| IPI00017601       | CP Ceruloplasmin precursor                             | LISVDTEHSNIYLNQGPDR     |
| IPI00017601       | CP Ceruloplasmin precursor                             | KALYLQYTDETFR           |
| IPI00017601       | CP Ceruloplasmin precursor                             | ALYLQYTDETFR            |
| IPI00017601       | CP Ceruloplasmin precursor                             | QYTDSTFR                |
| IPI00017601       | CP Ceruloplasmin precursor                             | AEEEHLGILGPQLHADVGDK    |
| IPI00017601       | CP Ceruloplasmin precursor                             | MYYSAVDPTK              |
| IPI00017601       | CP Ceruloplasmin precursor                             | TYS DHPEKVNKDDEEFIESNK  |
| IPI00017601       | CP Ceruloplasmin precursor                             | KLISVDTEHSNIYLNQGPDR    |
| IPI00017601       | CP Ceruloplasmin precursor                             | EYTDASFTNR              |
| IPI00018352       | Ubiquitin carboxyl-terminal hydrolase isozyme L1       | NEAIQAAHDAVAQEGQCR      |
| IPI00018352       | Ubiquitin carboxyl-terminal hydrolase isozyme L1       | LGVAGQWR                |
| IPI00019568       | Prothrombin precursor                                  | NPDSSTTGPWCYTTDPTVR     |
| IPI00019568       | Prothrombin precursor                                  | SEGSSVNLSPPLEQCVDR      |
| IPI00019568       | Prothrombin precursor                                  | GQPSVLQVVNLPIVERPVCK    |
| IPI00019568       | Prothrombin precursor                                  | SPQELLCGASLISDR         |
| IPI00019568       | Prothrombin precursor                                  | LAVTTHGLPCLAWASAQAK     |
| IPI00019568       | Prothrombin precursor                                  | DKLAACLEGNCAEGLGTNYR    |
| IPI00019568       | Prothrombin precursor                                  | GDACEGDSGGPFVMK         |
| IPI00019568       | Prothrombin precursor                                  | TFGSGEADCGLRPLFEK       |
| IPI00019568       | Prothrombin precursor                                  | ETAASLLQAGYK            |
| IPI00019568       | Prothrombin precursor                                  | YGFYTHVFR               |
| IPI00019568       | Prothrombin precursor                                  | HQDFNSAVQLVENFCR        |
| IPI00019568       | Prothrombin precursor                                  | KPVAFSDYIHPVCLPDR       |
| IPI00019568       | Prothrombin precursor                                  | WYQMGIVSWGEGCDRDRGK     |
| IPI00019568       | Prothrombin precursor                                  | TATSEYQTFNPR            |
| IPI00019568       | Prothrombin precursor                                  | ELLESYIDGR              |
| IPI00019568       | Prothrombin precursor                                  | ITDNMFCAGYKPDEGKR       |
| IPI00019568       | Prothrombin precursor                                  | ITDNMFCAGYKPDEGK        |
| IPI00019943       | AFM Afamin precursor                                   | LKHELTDEELQSLTFNFANVVDK |
| IPI00019943       | AFM Afamin precursor                                   | IAPQLSTEELVSLGK         |
| IPI00019943       | AFM Afamin precursor                                   | SDVGFLPPFPTLDPEEK       |
| IPI00019943       | AFM Afamin precursor                                   | AESPEVCFNEESPK          |
| IPI00019943       | AFM Afamin precursor                                   | ICAMEGLPQK              |
| IPI00019943       | AFM Afamin precursor                                   | DADPDTFFAK              |

| IPI Accession No. | Protein Description                                   | Peptide Sequence       |
|-------------------|-------------------------------------------------------|------------------------|
| IPI00019943       | AFM Afamin precursor                                  | ESLLNHFLYEVAR          |
| IPI00019943       | AFM Afamin precursor                                  | FTDSENVQCQR            |
| IPI00019943       | AFM Afamin precursor                                  | RHPDLSIPELLR           |
| IPI00019943       | AFM Afamin precursor                                  | KSDVGFLLPPFTLDPEEK     |
| IPI00019943       | AFM Afamin precursor                                  | RPCFESLKADK            |
| IPI00019943       | AFM Afamin precursor                                  | SCCEEQNKVNCLQTR        |
| IPI00020012       | Amyloid-like protein 1 precursor                      | AALEGFLAALQADPPQAER    |
| IPI00020012       | Amyloid-like protein 1 precursor                      | VEQATQAIPMER           |
| IPI00020012       | Amyloid-like protein 1 precursor                      | QMYPELQIAR             |
| IPI00020012       | Amyloid-like protein 1 precursor                      | VIALINDQR              |
| IPI00020012       | Amyloid-like protein 1 precursor                      | CLPGEFVSEALLVPEGCR     |
| IPI00020012       | Amyloid-like protein 1 precursor                      | AALEGFLAALQAD          |
| IPI00020012       | Amyloid-like protein 1 precursor                      | RAALEGFLAALQADPPQAER   |
| IPI00020012       | Amyloid-like protein 1 precursor                      | EWAMADNQSK             |
| IPI00020091       | ORM2 Alpha-1-acid glycoprotein 2 precursor            | WFYIASAFR              |
| IPI00020091       | ORM2 Alpha-1-acid glycoprotein 2 precursor            | EQLGEFYEALDCLCIPR      |
| IPI00020091       | ORM2 Alpha-1-acid glycoprotein 2 precursor            | TEDTIFLR               |
| IPI00020091       | ORM2 Alpha-1-acid glycoprotein 2 precursor            | TLMFGSYLDDEK           |
| IPI00020091       | ORM2 Alpha-1-acid glycoprotein 2 precursor            | EHVAHLLFLR             |
| IPI00020091       | ORM2 Alpha-1-acid glycoprotein 2 precursor            | SDVMYTDWKK             |
| IPI00020091       | ORM2 Alpha-1-acid glycoprotein 2 precursor            | NWGLSFYADKPETTK        |
| IPI00020091       | ORM2 Alpha-1-acid glycoprotein 2 precursor            | SDVMYTDWK              |
| IPI00020557       | Prolow-density lipoprotein receptor-related protein 1 | DCPDGSDEAPEICPQSK      |
| IPI00020557       | Prolow-density lipoprotein receptor-related protein 1 | SERPPIFEIR             |
| IPI00020557       | Prolow-density lipoprotein receptor-related protein 1 | AALSGANVLTIEK          |
| IPI00020599       | Calreticulin precursor                                | EQFLDGDGWTSR           |
| IPI00020599       | Calreticulin precursor                                | HEQNIDCGGGYVK          |
| IPI00020986       | Lumican precursor                                     | NIPTVNENLENYYLEVNQLEK  |
| IPI00020986       | Lumican precursor                                     | LPSGLPVSLTLYLDNNK      |
| IPI00020986       | Lumican precursor                                     | SLEYLDLSFNQIAR         |
| IPI00020986       | Lumican precursor                                     | SLEDLQLTHNK            |
| IPI00020986       | Lumican precursor                                     | ISETSLPPDMEYELR        |
| IPI00020986       | Lumican precursor                                     | LKEDAVSAAFK            |
| IPI00021000       | Isoform A of Osteopontin precursor                    | AIPVAQDLNAPSWDWSR      |
| IPI00021000       | Isoform A of Osteopontin precursor                    | YPDVAATWLNPDPSQK       |
| IPI00021033       | Isoform 1 of Collagen alpha-1(III) chain precursor    | FTYTVLEDGCTK           |
| IPI00021033       | Isoform 1 of Collagen alpha-1(III) chain precursor    | INTDEIMTSLK            |
| IPI00021439       | ACTB Actin, cytoplasmic 1                             | SYELPDGQVITIGNER       |
| IPI00021439       | ACTB Actin, cytoplasmic 1                             | VAPEEHPVLLTEAPLNPK     |
| IPI00021439       | ACTB Actin, cytoplasmic 1                             | LCYVALDFEQEMATAASSSLEK |
| IPI00021439       | ACTB Actin, cytoplasmic 1                             | GYSFTTTAER             |
| IPI00021439       | ACTB Actin, cytoplasmic 1                             | TTGIVMDSGDGVTHTVPIYEGY |
| IPI00021807       | cDNA FLJ56157, highly similar to Glucosylceramidase   | NLDVAVALMHPDGSVVVVLNR  |
| IPI00021812       | Neuroblast differentiation associated                 | VDVECPDVNIEGPEGK       |
| IPI00021812       | Neuroblast differentiation associated                 | VDVEGPDVNIEGPEGK       |
| IPI00021841       | Apolipoprotein A-I precursor                          | WQEEMELYR              |
| IPI00021841       | Apolipoprotein A-I precursor                          | DYVSQFEGSALGK          |
| IPI00021841       | Apolipoprotein A-I precursor                          | THLAPYSDELK            |
| IPI00021841       | Apolipoprotein A-I precursor                          | VSFLSALEEYTK           |
| IPI00021841       | Apolipoprotein A-I precursor                          | LREQLGPVTQEFWDNLEK     |
| IPI00021841       | Apolipoprotein A-I precursor                          | QGLLPVLESFK            |
| IPI00021841       | Apolipoprotein A-I precursor                          | LSPLGEEMR              |
| IPI00021841       | Apolipoprotein A-I precursor                          | VQPYLDDFQK             |
| IPI00021841       | Apolipoprotein A-I precursor                          | AKPALEDLR              |
| IPI00021841       | Apolipoprotein A-I precursor                          | DSGRDYVSQFEGSALGK      |

| IPI Accession No. | Protein Description            | Peptide Sequence                  |
|-------------------|--------------------------------|-----------------------------------|
| IPI00021841       | Apolipoprotein A-I precursor   | LLDNWDSVTSTFSK                    |
| IPI00021841       | Apolipoprotein A-I precursor   | DLATVYVDVLK                       |
| IPI00021841       | Apolipoprotein A-I precursor   | VEPLRAELQEGAR                     |
| IPI00021841       | Apolipoprotein A-I precursor   | VSFLSALEEYTKK                     |
| IPI00021841       | Apolipoprotein A-I precursor   | EQLGPVTQEFWDNLEK                  |
| IPI00021841       | Apolipoprotein A-I precursor   | EQLGPVTQEFWDNLEKETEGLR            |
| IPI00021842       | Apolipoprotein E precursor     | VQAAVGTSAAPVPSDNH                 |
| IPI00021842       | Apolipoprotein E precursor     | SWFEPLVEDMQR                      |
| IPI00021842       | Apolipoprotein E precursor     | GEVQAMLGQSTEELR                   |
| IPI00021842       | Apolipoprotein E precursor     | AKLEEQAQQIR                       |
| IPI00021842       | Apolipoprotein E precursor     | AATVGSLAGQPLQER                   |
| IPI00021842       | Apolipoprotein E precursor     | LGPLVEQGR                         |
| IPI00021842       | Apolipoprotein E precursor     | LDEVKEQVAEVR                      |
| IPI00021842       | Apolipoprotein E precursor     | LQAEAFQAR                         |
| IPI00021842       | Apolipoprotein E precursor     | LGADMEDVCGR                       |
| IPI00021842       | Apolipoprotein E precursor     | DRLDEVKEQVAEVR                    |
| IPI00021842       | Apolipoprotein E precursor     | WVQTLSEVQEELSSQVTQELR             |
| IPI00021842       | Apolipoprotein E precursor     | LKSWFEPLVEDMQR                    |
| IPI00021842       | Apolipoprotein E precursor     | RLAVYQAGAR                        |
| IPI00021854       | Apolipoprotein A-II precursor  | EPCVESLVSQYFQTVTDYGK              |
| IPI00021854       | Apolipoprotein A-II precursor  | SKEQLTPLIK                        |
| IPI00021854       | Apolipoprotein A-II precursor  | VKSPELQAEAK                       |
| IPI00021854       | Apolipoprotein A-II precursor  | SPELQAEAK                         |
| IPI00021856       | Apolipoprotein C-II            | TYLPAVDEK                         |
| IPI00021856       | Apolipoprotein C-II            | STAAMSTYTGIFTDQVLSVLK             |
| IPI00021856       | Apolipoprotein C-II            | STAAMSTYTGIFTDQVLSVLKGEE          |
| IPI00021856       | Apolipoprotein C-II            | ESLSSYWESAK                       |
| IPI00021857       | Apolipoprotein C-III precursor | DALSSVQESQVAQQAR                  |
| IPI00021857       | Apolipoprotein C-III precursor | GWVTDGFSSLK                       |
| IPI00021857       | Apolipoprotein C-III precursor | GWVTDGFSSLKDYWSTVK                |
| IPI00021885       | Splice Isoform 1 Of Fibrinogen | GLIDEVNQDFTNR                     |
| IPI00021885       | Splice Isoform 1 Of Fibrinogen | DSDWPFCSDDEDWNYK                  |
| IPI00021885       | Splice Isoform 1 Of Fibrinogen | EVDLKDYEDQQK                      |
| IPI00021885       | Splice Isoform 1 Of Fibrinogen | VQHIQLLQK                         |
| IPI00021885       | Splice Isoform 1 Of Fibrinogen | HPDEAAFFDTASTGK                   |
| IPI00021885       | Splice Isoform 1 Of Fibrinogen | ESSSHHPGIAEFPSSR                  |
| IPI00021885       | Splice Isoform 1 Of Fibrinogen | EVVTSSESDGSDCPEAMDGLTSLGIGTLTDGFR |
| IPI00021885       | Splice Isoform 1 Of Fibrinogen | MKPVPDLVPGNFK                     |
| IPI00021885       | Splice Isoform 1 Of Fibrinogen | TFPGFFSPMLGEFVSETESR              |
| IPI00021885       | Splice Isoform 1 Of Fibrinogen | DSHSLTTNIMEILR                    |
| IPI00021885       | Splice Isoform 1 Of Fibrinogen | ESSSHHPGIAEFPSSR                  |
| IPI00021885       | Splice Isoform 1 Of Fibrinogen | LKNSLFEYQK                        |
| IPI00021885       | Splice Isoform 1 Of Fibrinogen | VELEDWAGNEAYAEYHFR                |
| IPI00021885       | Splice Isoform 1 Of Fibrinogen | GGSTSYGTGSETESPR                  |
| IPI00021885       | Splice Isoform 1 Of Fibrinogen | GSESGIFTNTK                       |
| IPI00021885       | Splice Isoform 1 Of Fibrinogen | EVDLKDYEDQQKLEQVIAK               |
| IPI00021885       | Splice Isoform 1 Of Fibrinogen | NNKDSHSLTTNIMEILR                 |
| IPI00021885       | Splice Isoform 1 Of Fibrinogen | VIEKVQHIQLLQK                     |
| IPI00021885       | Splice Isoform 1 Of Fibrinogen | QFTSSTSYNR                        |
| IPI00021885       | Splice Isoform 1 Of Fibrinogen | VTSGSTTTTR                        |
| IPI00022229       | Apolipoprotein B-100 precursor | ALVEQGFTVPEIK                     |
| IPI00022229       | Apolipoprotein B-100 precursor | DAVEKPEFTIVAF                     |
| IPI00022229       | Apolipoprotein B-100 precursor | GIISALLVPPETEEAK                  |
| IPI00022229       | Apolipoprotein B-100 precursor | ASGSLPYTQTLQDHLNSLK               |
| IPI00022229       | Apolipoprotein B-100 precursor | VPSYTLILPSLELPVLHVPR              |

| IPI Accession No. | Protein Description                                | Peptide Sequence          |
|-------------------|----------------------------------------------------|---------------------------|
| IPI00022229       | Apolipoprotein B-100 precursor                     | LLSGGNTLHLVSTTK           |
| IPI00022229       | Apolipoprotein B-100 precursor                     | TEHGSEMLFFGNAIEGK         |
| IPI00022229       | Apolipoprotein B-100 precursor                     | IDDIWNLEVK                |
| IPI00022229       | Apolipoprotein B-100 precursor                     | AHLDIAGSLEGHLR            |
| IPI00022229       | Apolipoprotein B-100 precursor                     | LNGEIQALELPQKAEALK        |
| IPI00022229       | Apolipoprotein B-100 precursor                     | IHSGSFQSQVELSNDQEK        |
| IPI00022229       | Apolipoprotein B-100 precursor                     | LALWGEHTGQLYSK            |
| IPI00022229       | Apolipoprotein B-100 precursor                     | LPYTIITTPPLKDFSLWEK       |
| IPI00022229       | Apolipoprotein B-100 precursor                     | HIQNIDIQHLAGK             |
| IPI00022229       | Apolipoprotein B-100 precursor                     | VLADKFIIPGLK              |
| IPI00022229       | Apolipoprotein B-100 precursor                     | LEIQSQVDSQHVGHSVLTAK      |
| IPI00022229       | Apolipoprotein B-100 precursor                     | VNQLNVYESGSLNFSK          |
| IPI00022229       | Apolipoprotein B-100 precursor                     | TIHDLHLFIENIDFNK          |
| IPI00022229       | Apolipoprotein B-100 precursor                     | MYQMDIQQELQR              |
| IPI00022229       | Apolipoprotein B-100 precursor                     | AEPLAFTFSHDYK             |
| IPI00022229       | Apolipoprotein B-100 precursor                     | IADFELPTIIVPEQTIEPSIK     |
| IPI00022229       | Apolipoprotein B-100 precursor                     | ILGEELGFASLHDLQLLGK       |
| IPI00022229       | Apolipoprotein B-100 precursor                     | ATFQTPDFIVPLTDLR          |
| IPI00022229       | Apolipoprotein B-100 precursor                     | HSITNPLAVLCEFISQSIK       |
| IPI00022314       | Superoxide dismutase [Mn], mitochondrial precursor | GDVTAQIALQPALK            |
| IPI00022314       | Superoxide dismutase [Mn], mitochondrial precursor | HHAAAYVNNLNVTEEK          |
| IPI00022395       | C9 Complement component C9 precursor               | AIEDYINEFSVR              |
| IPI00022395       | C9 Complement component C9 precursor               | LSPIYNLVPVK               |
| IPI00022395       | C9 Complement component C9 precursor               | TEHYEEQIEAFK              |
| IPI00022395       | C9 Complement component C9 precursor               | DVVLTTTFVDDIK             |
| IPI00022395       | C9 Complement component C9 precursor               | TSNFNAAISLK               |
| IPI00022395       | C9 Complement component C9 precursor               | DRDGNTLTYR                |
| IPI00022395       | C9 Complement component C9 precursor               | QCVPTPECEDAEDDCGNDFQCSTGR |
| IPI00022395       | C9 Complement component C9 precursor               | SIEVFGQFNGK               |
| IPI00022395       | C9 Complement component C9 precursor               | NRDVVLTTTFVDDIK           |
| IPI00022395       | C9 Complement component C9 precursor               | SIEVFGQFNGKR              |
| IPI00022395       | C9 Complement component C9 precursor               | CLCACPFK                  |
| IPI00022395       | C9 Complement component C9 precursor               | AEQCCEETASSISLHGK         |
| IPI00022395       | C9 Complement component C9 precursor               | CLCACPFKFEGIACEISK        |
| IPI00022395       | C9 Complement component C9 precursor               | DGNTLTYR                  |
| IPI00022395       | C9 Complement component C9 precursor               | VVEESELAR                 |
| IPI00022417       | Leucine-rich alpha-2-glycoprotein                  | VAAGAFQGLR                |
| IPI00022417       | Leucine-rich alpha-2-glycoprotein                  | ALGHLDLSGNR               |
| IPI00022417       | Leucine-rich alpha-2-glycoprotein                  | NALTGLPPGLFQASATLDTLVLK   |
| IPI00022417       | Leucine-rich alpha-2-glycoprotein                  | TLDLGENQLETLPDCLR         |
| IPI00022417       | Leucine-rich alpha-2-glycoprotein                  | ENQLEVLEVSWLHGLK          |
| IPI00022417       | Leucine-rich alpha-2-glycoprotein                  | DGFDISGNPWICDQNLSDLYR     |
| IPI00022417       | Leucine-rich alpha-2-glycoprotein                  | GPLQLER                   |
| IPI00022417       | Leucine-rich alpha-2-glycoprotein                  | DLLLQPDLR                 |
| IPI00022417       | Leucine-rich alpha-2-glycoprotein                  | LHLEGNKLVLGK              |
| IPI00022420       | Plasma retinol-binding protein precursor           | YWGVASFQK                 |
| IPI00022420       | Plasma retinol-binding protein precursor           | LLNLDGTCADSYSFVFSR        |
| IPI00022420       | Plasma retinol-binding protein precursor           | FSGTWYAMAK                |
| IPI00022420       | Plasma retinol-binding protein precursor           | LIVHNGYCDGR               |
| IPI00022420       | Plasma retinol-binding protein precursor           | QRQEELCLR                 |
| IPI00022420       | Plasma retinol-binding protein precursor           | LLNNWDVVCADVMGTFTDTEPAK   |
| IPI00022426       | AMBP protein precursor                             | TVAACNLPIVR               |
| IPI00022426       | AMBP protein precursor                             | VVAQGVGIPEDSIFTMADR       |
| IPI00022426       | AMBP protein precursor                             | AFIQLWAFDAVK              |
| IPI00022426       | AMBP protein precursor                             | GECVPGEQEPELIPR           |



| IPI Accession No. | Protein Description                        | Peptide Sequence             |
|-------------------|--------------------------------------------|------------------------------|
| IPI00022426       | AMBP protein precursor                     | EDSCQLGYSAGPCMGMTSR          |
| IPI00022426       | AMBP protein precursor                     | EYCGVPGDGDEELLR              |
| IPI00022426       | AMBP protein precursor                     | KEDSCQLGYSAGPCMGMTSR         |
| IPI00022426       | AMBP protein precursor                     | GVCEETSGAYEKTDTDGK           |
| IPI00022429       | ORM1 Alpha-1-acid glycoprotein 1 precursor | EQLGEFYEALDCLR               |
| IPI00022429       | ORM1 Alpha-1-acid glycoprotein 1 precursor | YVGGQEHFHAHLILR              |
| IPI00022429       | ORM1 Alpha-1-acid glycoprotein 1 precursor | SDVVYTDWKK                   |
| IPI00022429       | ORM1 Alpha-1-acid glycoprotein 1 precursor | TYMLAFDVNDEK                 |
| IPI00022429       | ORM1 Alpha-1-acid glycoprotein 1 precursor | SDVVYTDWK                    |
| IPI00022429       | ORM1 Alpha-1-acid glycoprotein 1 precursor | NWGLSVYADKPETTK              |
| IPI00022431       | Alpha-2-HS-glycoprotein precursor          | HTLNQIDEVK                   |
| IPI00022431       | Alpha-2-HS-glycoprotein precursor          | AQLVPLPPSTYVEFTVSGTDCVAK     |
| IPI00022431       | Alpha-2-HS-glycoprotein precursor          | HTFMGVVSLGSPSSEVSHPR         |
| IPI00022431       | Alpha-2-HS-glycoprotein precursor          | EHAVEGDGDFQLLK               |
| IPI00022431       | Alpha-2-HS-glycoprotein precursor          | QLKEHAVEGDGDFQLLK            |
| IPI00022432       | Transthyretin precursor                    | AADDTWEPFASGK                |
| IPI00022432       | Transthyretin precursor                    | YTIAALLSPYSYSTTAVVTNPKE      |
| IPI00022432       | Transthyretin precursor                    | GSPAINVAHVFR                 |
| IPI00022432       | Transthyretin precursor                    | KAADDTWEPFASGK               |
| IPI00022432       | Transthyretin precursor                    | YTIAALLSPYSYSTTAVVTNPK       |
| IPI00022432       | Transthyretin precursor                    | TSESGELHGLTTEEEFVEGIYK       |
| IPI00022432       | Transthyretin precursor                    | RYTIAALLSPYSYSTTAVVTNPKE     |
| IPI00022432       | Transthyretin precursor                    | GSPAINVAHVFRK                |
| IPI00022432       | Transthyretin precursor                    | TSESGELHGLTTEEEFVEGIYKVEIDTK |
| IPI00022463       | Serotransferrin precursor                  | FDEFFSEGCAPGSK               |
| IPI00022463       | Serotransferrin precursor                  | TAGWNIPMGLLYNK               |
| IPI00022463       | Serotransferrin precursor                  | EDPQTFYYAVAVVK               |
| IPI00022463       | Serotransferrin precursor                  | IECVSAETTEDCIAK              |
| IPI00022463       | Serotransferrin precursor                  | SASDLTWDNLK                  |
| IPI00022463       | Serotransferrin precursor                  | SAGWNIPIGLLYCDLPEPR          |
| IPI00022463       | Serotransferrin precursor                  | LKCDEWSVNSVGK                |
| IPI00022463       | Serotransferrin precursor                  | DYELLCLDGTR                  |
| IPI00022463       | Serotransferrin precursor                  | EGTCPEAPTDECKPVK             |
| IPI00022463       | Serotransferrin precursor                  | NLNEKDYELLCLDGTR             |
| IPI00022463       | Serotransferrin precursor                  | ADRDQYELLCLDNTR              |
| IPI00022463       | Serotransferrin precursor                  | KPVDEYKDCHLAQVPSHTVVAR       |
| IPI00022463       | Serotransferrin precursor                  | SKEFQLFSSPHGK                |
| IPI00022463       | Serotransferrin precursor                  | DLLFRDDTVCLAK                |
| IPI00022463       | Serotransferrin precursor                  | KSASDLTWDNLK                 |
| IPI00022463       | Serotransferrin precursor                  | HSTIFENLANK                  |
| IPI00022463       | Serotransferrin precursor                  | DQYELLCLDNTR                 |
| IPI00022463       | Serotransferrin precursor                  | FDEFFSEGCAPGSKK              |
| IPI00022463       | Serotransferrin precursor                  | DGAGDVAFVK                   |
| IPI00022463       | Serotransferrin precursor                  | LCMGSGLNLCPEPNNK             |
| IPI00022463       | Serotransferrin precursor                  | SVIPSDGPSVACVK               |
| IPI00022488       | HPX Hemopexin precursor                    | YYCFQGNQFLR                  |
| IPI00022488       | HPX Hemopexin precursor                    | NFPSPVDAAFR                  |
| IPI00022488       | HPX Hemopexin precursor                    | SGAQATWTELPWPHEK             |
| IPI00022488       | HPX Hemopexin precursor                    | GGYTLVSGYPK                  |
| IPI00022488       | HPX Hemopexin precursor                    | FDPVRGEVPPR                  |
| IPI00022488       | HPX Hemopexin precursor                    | GECQAEGVLFFQGD               |
| IPI00022488       | HPX Hemopexin precursor                    | EVGTPHGIIILDSVDAAFICPGSSR    |
| IPI00022488       | HPX Hemopexin precursor                    | GDKVWVYPPEKK                 |
| IPI00022488       | HPX Hemopexin precursor                    | VDGALCMEK                    |
| IPI00022488       | HPX Hemopexin precursor                    | GDKVWVYPPEK                  |

| IPI Accession No. | Protein Description                                                         | Peptide Sequence             |
|-------------------|-----------------------------------------------------------------------------|------------------------------|
| IPI00022488       | HPX Hemopexin precursor                                                     | LYLVQGTQVYVFLTK              |
| IPI00022488       | HPX Hemopexin precursor                                                     | SWPAVGNCSALR                 |
| IPI00022488       | HPX Hemopexin precursor                                                     | CSPHLVLSALTSDNHGATYAFSGTHYWR |
| IPI00022488       | HPX Hemopexin precursor                                                     | WKNFPPVDAAFR                 |
| IPI00022488       | HPX Hemopexin precursor                                                     | LLQDEFPGIPSPDLAAVECH         |
| IPI00022488       | HPX Hemopexin precursor                                                     | SLGPNSCSANGPLYLIHGPN         |
| IPI00022608       | Sortilin-related receptor                                                   | YDLASGATEQLPLTGLR            |
| IPI00022608       | Sortilin-related receptor                                                   | GGTWEFLQAPAFITGYGK           |
| IPI00022608       | Sortilin-related receptor                                                   | SDDFGQTWIMIQEHVK             |
| IPI00022895       | A1BG Alpha-1B-glycoprotein precursor                                        | SGLSTGWTQLSK                 |
| IPI00022895       | A1BG Alpha-1B-glycoprotein precursor                                        | VTLTCVAPLSGVDFQLR            |
| IPI00022895       | A1BG Alpha-1B-glycoprotein precursor                                        | CEGPIPDVTFELLR               |
| IPI00022895       | A1BG Alpha-1B-glycoprotein precursor                                        | HQFLLTGDTQGR                 |
| IPI00022895       | A1BG Alpha-1B-glycoprotein precursor                                        | ATWSGAVLAGR                  |
| IPI00022895       | A1BG Alpha-1B-glycoprotein precursor                                        | NGVAQEPVHLDSPAIK             |
| IPI00022895       | A1BG Alpha-1B-glycoprotein precursor                                        | CLAPLEGAR                    |
| IPI00022895       | A1BG Alpha-1B-glycoprotein precursor                                        | SLPAPWLSMAPVSWITPGLK         |
| IPI00022895       | A1BG Alpha-1B-glycoprotein precursor                                        | TPGAAANLELIFVGPQHAGNYR       |
| IPI00022895       | A1BG Alpha-1B-glycoprotein precursor                                        | LELHVDGPPRPQLR               |
| IPI00022895       | A1BG Alpha-1B-glycoprotein precursor                                        | IFFHLNAVALGDGGHYTCR          |
| IPI00022895       | A1BG Alpha-1B-glycoprotein precursor                                        | LLELTGPK                     |
| IPI00022895       | A1BG Alpha-1B-glycoprotein precursor                                        | TDGEGALSEPSATVTIEELAAPPPVLMH |
| IPI00022937       | Coagulation factor V precursor                                              | EFNPLVIVGLSK                 |
| IPI00022937       | Coagulation factor V precursor                                              | ETDIEDSDDIPEDTTYKK           |
| IPI00022937       | Coagulation factor V precursor                                              | ASKPGWLLNTEVGENQR            |
| IPI00022937       | Coagulation factor V precursor                                              | NFFNPPIISR                   |
| IPI00022937       | Coagulation factor V precursor                                              | SWYLEDNINK                   |
| IPI00022937       | Coagulation factor V precursor                                              | AADIEQQAFAVFDENK             |
| IPI00022937       | Coagulation factor V precursor                                              | ETDIEDSDDIPEDTTYK            |
| IPI00022937       | Coagulation factor V precursor                                              | DIHSLIGPLLICQK               |
| IPI00022937       | Coagulation factor V precursor                                              | GEYEEHLGILGPIIR              |
| IPI00022937       | Coagulation factor V precursor                                              | QHQLGVWPLLPGSFK              |
| IPI00022937       | Coagulation factor V precursor                                              | DIASGLIGLLLICK               |
| IPI00023014       | Von Willebrand factor precursor                                             | FSEEAVALTSPTEACHR            |
| IPI00023014       | Von Willebrand factor precursor                                             | VIVIPVGIGPHANLK              |
| IPI00023014       | Von Willebrand factor precursor                                             | SGFTYVLHEGECGR               |
| IPI00023014       | Von Willebrand factor precursor                                             | ILDELLQTCVDPEDCPVEVAGR       |
| IPI00023648       | Immunoglobulin superfamily containing leucine-rich repeat protein precursor | ALPGTPVASSQPR                |
| IPI00023648       | Immunoglobulin superfamily containing leucine-rich repeat protein precursor | YGFQIADCA YR                 |
| IPI00023648       | Immunoglobulin superfamily containing leucine-rich repeat protein precursor | TVAAGALASLSHLK               |
| IPI00023648       | Immunoglobulin superfamily containing leucine-rich repeat protein precursor | MDSNELTFIPR                  |
| IPI00023673       | Galectin-3 binding protein precursor                                        | SDLAVPSELALLK                |
| IPI00023673       | Galectin-3 binding protein precursor                                        | YSSDYFQAPSDYR                |
| IPI00023673       | Galectin-3 binding protein precursor                                        | AAFQGGSGPIMLDEVQCTGTEASLADCK |
| IPI00023673       | Galectin-3 binding protein precursor                                        | AVDTWSWGER                   |
| IPI00023673       | Galectin-3 binding protein precursor                                        | ASHEEVEGLVEK                 |
| IPI00023673       | Galectin-3 binding protein precursor                                        | IYTSPTWSAFVTDSSWSAR          |
| IPI00023673       | Galectin-3 binding protein precursor                                        | TLQALEFHVTPFQLLAR            |
| IPI00023673       | Galectin-3 binding protein precursor                                        | YYPYQSFQTPQHPSFLQDK          |
| IPI00023845       | Kallikrein-6 precursor                                                      | GLVSWGNI PCGSK               |
| IPI00023845       | Kallikrein-6 precursor                                                      | LSELIQPLPLER                 |
| IPI00023845       | Kallikrein-6 precursor                                                      | KPNLQVFLGK                   |
| IPI00023845       | Kallikrein-6 precursor                                                      | DSCQGDSSGGLVCGDHLR           |
| IPI00023845       | Kallikrein-6 precursor                                                      | TADGDFPDTIQCA YIHLVSR        |
| IPI00023845       | Kallikrein-6 precursor                                                      | AVIHPDYDAASHDQDIMLLR         |

| IPI Accession No. | Protein Description                                                            | Peptide Sequence         |
|-------------------|--------------------------------------------------------------------------------|--------------------------|
| IPI00023845       | Kallikrein-6 precursor                                                         | EKPGVYTNVCR              |
| IPI00024036       | Cadherin-8                                                                     | LVYSILEGQPYFSIEPETAIK    |
| IPI00024036       | Cadherin-8                                                                     | DPDITSSPIR               |
| IPI00024046       | CDH13 Cadherin-13 precursor                                                    | SIVVSPILIPENQR           |
| IPI00024046       | CDH13 Cadherin-13 precursor                                                    | TPHAEDMAELVIVGGK         |
| IPI00024046       | CDH13 Cadherin-13 precursor                                                    | VNSDGGGLVALR             |
| IPI00024284       | Basement membrane-specific heparan sulfate proteoglycan core protein precursor | GSVYIGGAPDVATLTGGR       |
| IPI00024284       | Basement membrane-specific heparan sulfate proteoglycan core protein precursor | LLSGPYFWSLPSR            |
| IPI00024284       | Basement membrane-specific heparan sulfate proteoglycan core protein precursor | LVSEDPINDGEWHR           |
| IPI00024284       | Basement membrane-specific heparan sulfate proteoglycan core protein precursor | RGSIQVDGEELVSGR          |
| IPI00024284       | Basement membrane-specific heparan sulfate proteoglycan core protein precursor | DFISLGLQDGHVFR           |
| IPI00024284       | Basement membrane-specific heparan sulfate proteoglycan core protein precursor | LLQVTPADSGEYVCR          |
| IPI00024284       | Basement membrane-specific heparan sulfate proteoglycan core protein precursor | LRLPQVSPADSGEYVCR        |
| IPI00024284       | Basement membrane-specific heparan sulfate proteoglycan core protein precursor | AVTLECVSAGEPR            |
| IPI00024284       | Basement membrane-specific heparan sulfate proteoglycan core protein precursor | IESSSPTVVEGQTLDLNCVVAR   |
| IPI00024825       | Isoform A of Proteoglycan-4 precursor                                          | ITEVWGIPSIDTVFTR         |
| IPI00024825       | Isoform A of Proteoglycan-4 precursor                                          | GFGGLTGQIVAALSTAK        |
| IPI00024825       | Isoform A of Proteoglycan-4 precursor                                          | GLPNVVTSAISLPNIR         |
| IPI00024825       | Isoform A of Proteoglycan-4 precursor                                          | GHYFWMLSPFSPSPAR         |
| IPI00024825       | Isoform A of Proteoglycan-4 precursor                                          | YKNWPESVYFFK             |
| IPI00024966       | Contactin-2 precursor                                                          | VIASNILGTGEPSPSSK        |
| IPI00024966       | Contactin-2 precursor                                                          | RGDGPESLTALVYSAEEPR      |
| IPI00024966       | Contactin-2 precursor                                                          | VTVTPDGTLIIR             |
| IPI00024966       | Contactin-2 precursor                                                          | FGFLQEFSK                |
| IPI00024966       | Contactin-2 precursor                                                          | YTCMAQTVVDSASK           |
| IPI00024966       | Contactin-2 precursor                                                          | AQDAGVYQCLASNPVGTVVS     |
| IPI00024966       | Contactin-2 precursor                                                          | EYQNGDGFYLLSFR           |
| IPI00024966       | Contactin-2 precursor                                                          | ETIGDLTILNAQLR           |
| IPI00024966       | Contactin-2 precursor                                                          | RPPGNISWTFSSSSLSIK       |
| IPI00024966       | Contactin-2 precursor                                                          | HQLVGGNLMVIMNPTK         |
| IPI00025257       | Semaphorin-7A precursor                                                        | LQDVFLLPDPSGQWR          |
| IPI00025257       | Semaphorin-7A precursor                                                        | DCENYITLLER              |
| IPI00025257       | Semaphorin-7A precursor                                                        | GYAPFPDENSLVLFEGDEVYSTIR |
| IPI00025257       | Semaphorin-7A precursor                                                        | ATIVHQDQAYDDK            |
| IPI00025257       | Semaphorin-7A precursor                                                        | DPYCGWDQGR               |
| IPI00025257       | Semaphorin-7A precursor                                                        | GESELYTSDTVMQNPQFIK      |
| IPI00025276       | Isoform XB of Tenascin-X precursor                                             | LGPIADSTTAPLEK           |
| IPI00025276       | Isoform XB of Tenascin-X precursor                                             | ILISGLEPSTPYR            |
| IPI00025276       | Isoform XB of Tenascin-X precursor                                             | VGGEESEVTVGGLEPGRK       |
| IPI00025276       | Isoform XB of Tenascin-X precursor                                             | DKDGGQPQVVPVAADQR        |
| IPI00025276       | Isoform XB of Tenascin-X precursor                                             | VGPVSAVGVTAPEEESPDAPLAK  |
| IPI00025363       | Isoform 1 of Glial fibrillary acidic protein                                   | HLQEYQDLLNVK             |
| IPI00025363       | Isoform 1 of Glial fibrillary acidic protein                                   | LRLDQLTANSAR             |
| IPI00025394       | Aromatic-L-amino-acid decarboxylase                                            | LVAYSSDQAHSVER           |
| IPI00025426       | Isoform 1 of Pregnancy zone protein precursor                                  | ATVLNLYLPK               |
| IPI00025426       | Isoform 1 of Pregnancy zone protein precursor                                  | SSGSLNNAIK               |
| IPI00025426       | Isoform 1 of Pregnancy zone protein precursor                                  | MVSGFIPLKPTVK            |
| IPI00025426       | Isoform 1 of Pregnancy zone protein precursor                                  | YGAATFTR                 |
| IPI00025426       | Isoform 1 of Pregnancy zone protein precursor                                  | NQGNTWLTAFVLK            |
| IPI00025426       | Isoform 1 of Pregnancy zone protein precursor                                  | AFQPFVVELTMPYSVIR        |
| IPI00025465       | Mimecan precursor                                                              | RLPIGSYF                 |
| IPI00025465       | Mimecan precursor                                                              | RLDFTGNLIEDIEDGTFSK      |
| IPI00025465       | Mimecan precursor                                                              | DFADIPNLR                |
| IPI00025465       | Mimecan precursor                                                              | EKETVIIPNEK              |
| IPI00025465       | Mimecan precursor                                                              | LEGNPIVLGK               |

| IPI Accession No. | Protein Description                                  | Peptide Sequence          |
|-------------------|------------------------------------------------------|---------------------------|
| IPI00025465       | Mimecan precursor                                    | LSLLEELSLAENQLLK          |
| IPI00025465       | Mimecan precursor                                    | VIHLQFNNIASITDDTFCK       |
| IPI00025465       | Mimecan precursor                                    | LDFTGNLIEDIEDGTFSK        |
| IPI00025465       | Mimecan precursor                                    | HPNSFICK                  |
| IPI00025465       | Mimecan precursor                                    | ETVIIPNEK                 |
| IPI00026104       | IDS Isoform Long of Iduronate 2-sulfatase precursor  | FRDLEEDPYLPGNPR           |
| IPI00026104       | IDS Isoform Long of Iduronate 2-sulfatase precursor  | LFPYLDPFDSASQLMEPGR       |
| IPI00026314       | Isoform 1 of Gelsolin precursor                      | AGALNSNDAFVLK             |
| IPI00026314       | Isoform 1 of Gelsolin precursor                      | AQPVQVAEGSEPDGFWEALGGK    |
| IPI00026314       | Isoform 1 of Gelsolin precursor                      | EVQGFESATFLGYFK           |
| IPI00026314       | Isoform 1 of Gelsolin precursor                      | HVVPNEVVVQR               |
| IPI00026314       | Isoform 1 of Gelsolin precursor                      | DSQEEEKTEALTSK            |
| IPI00026314       | Isoform 1 of Gelsolin precursor                      | TPSAAYLWVGTGASEAEK        |
| IPI00026314       | Isoform 1 of Gelsolin precursor                      | QTQVSVLPEGGETPLFK         |
| IPI00026314       | Isoform 1 of Gelsolin precursor                      | SEDCFILDHGK               |
| IPI00026314       | Isoform 1 of Gelsolin precursor                      | VPVDPATYGGQFYGGDSYIILYNYR |
| IPI00026314       | Isoform 1 of Gelsolin precursor                      | VPEARPNMVEHPEFLK          |
| IPI00026314       | Isoform 1 of Gelsolin precursor                      | SEDCFILDHGKDGK            |
| IPI00026314       | Isoform 1 of Gelsolin precursor                      | TASDFITK                  |
| IPI00026314       | Isoform 1 of Gelsolin precursor                      | EGGQTAPASTR               |
| IPI00026946       | Neuronal pentraxin-2 precursor                       | WHHICVTWTTR               |
| IPI00026946       | Neuronal pentraxin-2                                 | DPGHVVEQLSR               |
| IPI00026946       | Neuronal pentraxin-2                                 | VAQLPLFVSDGK              |
| IPI00027310       | Multiple EGF-like-domain protein 4                   | LGCGGSPCSPMPR             |
| IPI00027310       | Multiple EGF-like-domain protein 4                   | WTQMLAGAEDGGPGPSPR        |
| IPI00027310       | Multiple EGF-like-domain protein 4                   | LDGGQLVWETLMSDR           |
| IPI00027310       | Multiple EGF-like-domain protein 4                   | TGVPGGSEISFFLEPYR         |
| IPI00027310       | Multiple EGF-like-domain protein 4                   | DCHACTQDPFCEWHQSTSR       |
| IPI00027310       | Multiple EGF-like-domain protein 4                   | APQTVELPAVAGHTLTAR        |
| IPI00027310       | Multiple EGF-like-domain protein 4                   | GAMYLLGGLTAGGVTR          |
| IPI00027341       | Macrophage-capping protein                           | QAALQVAEGFISR             |
| IPI00027350       | Peroxiredoxin-2                                      | EGGLGPLNIPLLADVTR         |
| IPI00027350       | Peroxiredoxin-2                                      | ATAVVDGAFK                |
| IPI00027482       | SERPINA6 Corticosteroid-binding globulin precursor   | GTWTQPFDLASTR             |
| IPI00027482       | SERPINA6 Corticosteroid-binding globulin precursor   | EENFYVDETTVVK             |
| IPI00027482       | SERPINA6 Corticosteroid-binding globulin precursor   | HLVALSPK                  |
| IPI00027482       | SERPINA6 Corticosteroid-binding globulin precursor   | WSAGLTSSQVDLYIPK          |
| IPI00027482       | SERPINA6 Corticosteroid-binding globulin precursor   | MNTVIAALSR                |
| IPI00027497       | Glucose-6-phosphate isomerase                        | TLAQLNPESLFIHASK          |
| IPI00027497       | Glucose-6-phosphate isomerase                        | SNTPIILDGKDVMPVKNK        |
| IPI00027507       | Complement factor H-related protein 3 precursor      | RPYFPVAVGK                |
| IPI00027507       | Complement factor H-related protein 3 precursor      | CYFPYLENGYNQNYGR          |
| IPI00027507       | Complement factor H-related protein 3 precursor      | KCYFPYLENGYNQNYGR         |
| IPI00027780       | MMP2 72 kDa type IV collagenase precursor            | IIGYTPDLDPETVDDAFAR       |
| IPI00027780       | MMP2 72 kDa type IV collagenase precursor            | FQGTSYDSCCTEGR            |
| IPI00027780       | MMP2 72 kDa type IV collagenase precursor            | FFGLPQTGDLDQNTIETMR       |
| IPI00027780       | MMP2 72 kDa type IV collagenase precursor            | DKPMGPLLVATFWPELPEK       |
| IPI00027780       | MMP2 72 kDa type IV collagenase precursor            | AFQVWSDVTPLR              |
| IPI00027780       | MMP2 72 kDa type IV collagenase precursor            | WCGTTEDYDR                |
| IPI00027780       | MMP2 72 kDa type IV collagenase precursor            | SDGFLWCSTTYNFEK           |
| IPI00027780       | MMP2 72 kDa type IV collagenase precursor            | TDKELAVQYLNTFYGCPK        |
| IPI00027827       | Extracellular superoxide dismutase [Cu-Zn] precursor | AGLAASLAGPHSIVGR          |
| IPI00027827       | Extracellular superoxide dismutase [Cu-Zn] precursor | VTEIWQEVMQR               |
| IPI00027827       | Extracellular superoxide dismutase [Cu-Zn] precursor | LACCVVGCVPGLWER           |

| IPI Accession No. | Protein Description                                                        | Peptide Sequence             |
|-------------------|----------------------------------------------------------------------------|------------------------------|
| IPI00027827       | Extracellular superoxide dismutase [Cu-Zn] precursor                       | AVVVHAGEDDLGR                |
| IPI00027851       | Beta-hexosaminidase subunit alpha precursor                                | LTSDLTFAYER                  |
| IPI00027851       | Beta-hexosaminidase subunit alpha precursor                                | GYVVWQEVFDNK                 |
| IPI00028077       | Isoform 1 of Presenilin-1                                                  | ESQDTVAENDDGGFSEWEAQR        |
| IPI00028520       | Isoform 1 of NADH dehydrogenase [ubiquinone] flavoprotein 1, mitochondrial | FSGDITAPK                    |
| IPI00028570       | Isoform 1 of Glycogen synthase kinase-3 beta                               | PVQQPSAFGSMK                 |
| IPI00028714       | Matrix Gla-protein precursor                                               | NANTFISPQQR                  |
| IPI00028714       | Matrix Gla-protein precursor                                               | YAMVYGYNAAYNR                |
| IPI00029236       | Insulin-like growth factor binding protein 5                               | ALSMCPPSLGCELVK              |
| IPI00029260       | Monocyte differentiation antigen CD14 precursor                            | LTVGAAQVPAQLLVGALR           |
| IPI00029260       | Monocyte differentiation antigen CD14 precursor                            | FPAIQNLALR                   |
| IPI00029260       | Monocyte differentiation antigen CD14 precursor                            | AFPALTSLDLSDNPGLGER          |
| IPI00029260       | Monocyte differentiation antigen CD14 precursor                            | ITGTMPPLEATGLALSSLR          |
| IPI00029260       | Monocyte differentiation antigen CD14 precursor                            | VLSIAQAHSPAFCSEQVR           |
| IPI00029260       | Monocyte differentiation antigen CD14 precursor                            | RLTVGAAQVPAQLLVGALR          |
| IPI00029723       | FSTL1 Follistatin-related protein 1 precursor                              | ICANVFCGAGR                  |
| IPI00029739       | CFH Isoform 1 of Complement factor H precursor                             | CFEGFGIDGPAIAK               |
| IPI00029739       | CFH Isoform 1 of Complement factor H precursor                             | LGYVTADGETSGSITCGK           |
| IPI00029739       | CFH Isoform 1 of Complement factor H precursor                             | WSSPPQCEGLPCK                |
| IPI00029739       | CFH Isoform 1 of Complement factor H precursor                             | NTEILTGSWSDQTYPEGTQAIYK      |
| IPI00029739       | CFH Isoform 1 of Complement factor H precursor                             | DTSCVNPTVQNAIYVSR            |
| IPI00029739       | CFH Isoform 1 of Complement factor H precursor                             | LSYTCEGGFR                   |
| IPI00029739       | CFH Isoform 1 of Complement factor H precursor                             | SITCIHGVWTQLPQCVAIDK         |
| IPI00029739       | CFH Isoform 1 of Complement factor H precursor                             | SCDIPVFMNAR                  |
| IPI00029739       | CFH Isoform 1 of Complement factor H precursor                             | GDAVCTESGWRPLPSCEEK          |
| IPI00029739       | CFH Isoform 1 of Complement factor H precursor                             | VSVLCQENYLIQEGEITCK          |
| IPI00029739       | CFH Isoform 1 of Complement factor H precursor                             | KGEWVALNPLRK                 |
| IPI00029739       | CFH Isoform 1 of Complement factor H precursor                             | IEGDDEMHCSDDGFWSK            |
| IPI00029739       | CFH Isoform 1 of Complement factor H precursor                             | EQVQSCGPPPELLNGNVK           |
| IPI00029739       | CFH Isoform 1 of Complement factor H precursor                             | IDVHLVPDR                    |
| IPI00029739       | CFH Isoform 1 of Complement factor H precursor                             | WSHPPSCI                     |
| IPI00029739       | CFH Isoform 1 of Complement factor H precursor                             | TDCLSLPSFENAIPMGEKK          |
| IPI00029739       | CFH Isoform 1 of Complement factor H precursor                             | TKEEYGHSEVVEYYCNP            |
| IPI00029739       | CFH Isoform 1 of Complement factor H precursor                             | SSNLILEEHLK                  |
| IPI00029739       | CFH Isoform 1 of Complement factor H precursor                             | TGESVEFVCKR                  |
| IPI00029739       | CFH Isoform 1 of Complement factor H precursor                             | GKEGWIHTVCINGR               |
| IPI00029739       | CFH Isoform 1 of Complement factor H precursor                             | IVSSAMEPDREYHFQAVR           |
| IPI00029739       | CFH Isoform 1 of Complement factor H precursor                             | TDCLSLPSFENAIPMGEK           |
| IPI00029751       | Splice Isoform 1 Of Contactin 1 precursor                                  | GDGPYSLVAVINSAQDAPSEAPTEVGVK |
| IPI00029751       | Splice Isoform 1 Of Contactin 1 precursor                                  | VLEPMPSTAEISTSGAVLK          |
| IPI00029751       | Splice Isoform 1 Of Contactin 1 precursor                                  | NDGGIYTCFAENNR               |
| IPI00029751       | Splice Isoform 1 Of Contactin 1 precursor                                  | TTKPYPADIVVQFK               |
| IPI00029751       | Splice Isoform 1 Of Contactin 1 precursor                                  | HSIEVPIPR                    |
| IPI00029751       | Splice Isoform 1 Of Contactin 1 precursor                                  | FIPLIPIPER                   |
| IPI00029751       | Splice Isoform 1 Of Contactin 1 precursor                                  | MNNGDVDLTSDR                 |
| IPI00029751       | Splice Isoform 1 Of Contactin 1 precursor                                  | TDGAAPNVAPSDVGGGGGR          |
| IPI00029751       | Splice Isoform 1 Of Contactin 1 precursor                                  | AVDLIPWMEYEFR                |
| IPI00029751       | Splice Isoform 1 Of Contactin 1 precursor                                  | WLLNEFPVFITMDKR              |
| IPI00029751       | Splice Isoform 1 Of Contactin 1 precursor                                  | KVLEPMPSTAEISTSGAVLK         |
| IPI00029751       | Splice Isoform 1 Of Contactin 1 precursor                                  | VLSSSEISVHWEHVLEK            |
| IPI00029751       | Splice Isoform 1 Of Contactin 1 precursor                                  | ILALAPTFEMNPMKK              |
| IPI00029751       | Splice Isoform 1 Of Contactin 1 precursor                                  | ILALAPTFEMNPMK               |
| IPI00030739       | Apolipoprotein M                                                           | WIYHLTEGSTDLR                |
| IPI00031121       | CPE Carboxypeptidase E precursor                                           | AYSSFNAMSDPNRPPCR            |
| IPI00031121       | CPE Carboxypeptidase E precursor                                           | VAVPYSPAAGVDFELESFSE         |

| IPI Accession No. | Protein Description                 | Peptide Sequence      |
|-------------------|-------------------------------------|-----------------------|
| IPI00031121       | CPE Carboxypeptidase E precursor    | IHIMPSLNPDGFEK        |
| IPI00031121       | CPE Carboxypeptidase E precursor    | NLSISYLEQIHR          |
| IPI00031121       | CPE Carboxypeptidase E precursor    | TYWEDNKNSLSISYLEQIHR  |
| IPI00031121       | CPE Carboxypeptidase E precursor    | SNAQGIDLNR            |
| IPI00031121       | CPE Carboxypeptidase E precursor    | AASQPGELKDFVGR        |
| IPI00031121       | CPE Carboxypeptidase E precursor    | LTASAPGYLAITKK        |
| IPI00031121       | CPE Carboxypeptidase E precursor    | YIGNMHGNEAVGR         |
| IPI00031461       | Rab GDP dissociation inhibitor beta | NPYYGGESASITPLEDLYKR  |
| IPI00031461       | Rab GDP dissociation inhibitor beta | VPSTEAEALASSLMGLFEK   |
| IPI00032179       | SERPINC1 Antithrombin III variant   | EVPLNTIIFMGR          |
| IPI00032179       | SERPINC1 Antithrombin III variant   | ADGESCSASMMYQEGK      |
| IPI00032179       | SERPINC1 Antithrombin III variant   | VAEGTQVLELPFK         |
| IPI00032179       | SERPINC1 Antithrombin III variant   | FATTFYQHLADSK         |
| IPI00032179       | SERPINC1 Antithrombin III variant   | EQLQDMGLVDLFSPEK      |
| IPI00032179       | SERPINC1 Antithrombin III variant   | TSDQIHFFFAK           |
| IPI00032179       | SERPINC1 Antithrombin III variant   | FRIEDGFSLK            |
| IPI00032179       | SERPINC1 Antithrombin III variant   | DDLIVVSDAFHK          |
| IPI00032179       | SERPINC1 Antithrombin III variant   | LPGIVAEGRDDLIVVSDAFHK |
| IPI00032179       | SERPINC1 Antithrombin III variant   | ATEDEGSEQKIPEATNR     |
| IPI00032179       | SERPINC1 Antithrombin III variant   | DIPMNPICIYR           |
| IPI00032179       | SERPINC1 Antithrombin III variant   | GDDITMVLILPKPEK       |
| IPI00032179       | SERPINC1 Antithrombin III variant   | KATEDEGSEQKIPEATNR    |
| IPI00032220       | Angiotensinogen precursor           | SLDFTELDVAAEK         |
| IPI00032220       | Angiotensinogen precursor           | ALQDQLVLVAAK          |
| IPI00032220       | Angiotensinogen precursor           | DPTFIPAPIQAK          |
| IPI00032220       | Angiotensinogen precursor           | VLSALQAVQGLLVAQGR     |
| IPI00032220       | Angiotensinogen precursor           | FMQAVTGWK             |
| IPI00032220       | Angiotensinogen precursor           | SLDFTELDVAAEKIDR      |
| IPI00032220       | Angiotensinogen precursor           | QPFVQGLALYTPVVLPR     |
| IPI00032220       | Angiotensinogen precursor           | VEGLTFQNSLNWMK        |
| IPI00032220       | Angiotensinogen precursor           | ANAGKPKDPTFIPAPIQAK   |
| IPI00032220       | Angiotensinogen precursor           | AAMVGMLANFLGFR        |
| IPI00032258       | Complement component 4A             | VLSLAQEQVGGSPPEK      |
| IPI00032258       | Complement component 4A             | GSFEFPVGDVAVSK        |
| IPI00032258       | Complement component 4A             | TEQWSTLPPETK          |
| IPI00032258       | Complement component 4A             | DHAVDLIQK             |
| IPI00032258       | Complement component 4A             | YLDKTEQWSTLPPETK      |
| IPI00032258       | Complement component 4A             | ADGSYAAWLSR           |
| IPI00032258       | Complement component 4A             | SCGLHQLLR             |
| IPI00032258       | Complement component 4A             | EELVYELNPLDHR         |
| IPI00032258       | Complement component 4A             | KADGSYAAWLSR          |
| IPI00032258       | Complement component 4A             | VHYTVCIWR             |
| IPI00032258       | Complement component 4A             | SFFPENWLWR            |
| IPI00032258       | Complement component 4A             | GCGEQTMIYLAPTLAASR    |
| IPI00032258       | Complement component 4A             | DSSTWLTAFLVK          |
| IPI00032258       | Complement component 4A             | LLATLCSAEVCQCAEGK     |
| IPI00032258       | Complement component 4A             | ALEILQEEDLIDEDDIPVR   |
| IPI00032291       | Complement C5 precursor             | ALVEGVDQLFTDYQIK      |
| IPI00032291       | Complement C5 precursor             | TLLPVSKPEIR           |
| IPI00032291       | Complement C5 precursor             | TSTSEEVCSFYLK         |
| IPI00032291       | Complement C5 precursor             | KAFDICPLVK            |
| IPI00032291       | Complement C5 precursor             | ESYSGVTLDPR           |
| IPI00032291       | Complement C5 precursor             | SYFPESWLWEVHLVPR      |
| IPI00032291       | Complement C5 precursor             | ATLLDIYK              |
| IPI00032291       | Complement C5 precursor             | VSITSITVENVFK         |

| IPI Accession No. | Protein Description                                              | Peptide Sequence       |
|-------------------|------------------------------------------------------------------|------------------------|
| IPI00032291       | Complement C5 precursor                                          | IDTQDIEASHYR           |
| IPI00032291       | Complement C5 precursor                                          | TGEAVAEKDSEITFIKK      |
| IPI00032291       | Complement C5 precursor                                          | IVACASYKPSR            |
| IPI00032291       | Complement C5 precursor                                          | TGEAVAEKDSEITFIK       |
| IPI00032291       | Complement C5 precursor                                          | FSDASYQSINIPVTQNMVPSSR |
| IPI00032291       | Complement C5 precursor                                          | FSYSSGHVHLSSENK        |
| IPI00032291       | Complement C5 precursor                                          | ALLVGEHLNIIIVTPK       |
| IPI00032291       | Complement C5 precursor                                          | QCTMFYSTSNIK           |
| IPI00032291       | Complement C5 precursor                                          | LNLVATPLFLKPGIPYPIK    |
| IPI00032292       | TIMP1 Metalloproteinase inhibitor 1 precursor                    | EPGLCTWQSLR            |
| IPI00032292       | TIMP1 Metalloproteinase inhibitor 1 precursor                    | GFQALGDAADIR           |
| IPI00032292       | TIMP1 Metalloproteinase inhibitor 1 precursor                    | TYTVGCEECTVFPCLSIPIK   |
| IPI00032292       | TIMP1 Metalloproteinase inhibitor 1 precursor                    | LQSGTHCLWTDQLLQSEK     |
| IPI00032292       | TIMP1 Metalloproteinase inhibitor 1 precursor                    | FVYTPAMESVCGYFHR       |
| IPI00032293       | Cystatin C precursor                                             | ALDFAVGEYNK            |
| IPI00032293       | Cystatin C precursor                                             | LVGGPMDASVEEEGVRR      |
| IPI00032293       | Cystatin C precursor                                             | LVGGPMDASVEEEGVRR      |
| IPI00032293       | Cystatin C precursor                                             | TQPNLDNCPFHDQPHLK      |
| IPI00032293       | Cystatin C precursor                                             | RALDFAVGEYNK           |
| IPI00032293       | Cystatin C precursor                                             | TQPNLDNCPFHDQPHLKR     |
| IPI00032293       | Cystatin C precursor                                             | AFCSFQIYAVPWQGTMTLSK   |
| IPI00032293       | Cystatin C precursor                                             | KQIVAGVNYFLDVELGR      |
| IPI00032328       | KNG1 Isoform HMW of Kininogen-1 precursor                        | ENFLFLTPDCK            |
| IPI00032328       | KNG1 Isoform HMW of Kininogen-1 precursor                        | YFIDFVAR               |
| IPI00032328       | KNG1 Isoform HMW of Kininogen-1 precursor                        | TVGSDTFYSFK            |
| IPI00032328       | KNG1 Isoform HMW of Kininogen-1 precursor                        | KLQSLDCNAEVYVVPWEK     |
| IPI00032328       | KNG1 Isoform HMW of Kininogen-1 precursor                        | IASFSQNCDIYPGK         |
| IPI00032328       | KNG1 Isoform HMW of Kininogen-1 precursor                        | LGQSLDCNAEVYVVPWEK     |
| IPI00032328       | KNG1 Isoform HMW of Kininogen-1 precursor                        | YNSQNQSNQFVLYR         |
| IPI00032328       | KNG1 Isoform HMW of Kininogen-1 precursor                        | DIPTNSPELEETLTHITIK    |
| IPI00032328       | KNG1 Isoform HMW of Kininogen-1 precursor                        | TWQDCEYK               |
| IPI00032328       | KNG1 Isoform HMW of Kininogen-1 precursor                        | TWQDCEYKDAAK           |
| IPI00032328       | KNG1 Isoform HMW of Kininogen-1 precursor                        | LGQSLDCNAEVYVVPWEKK    |
| IPI00032328       | KNG1 Isoform HMW of Kininogen-1 precursor                        | KYFIDFVAR              |
| IPI00032328       | KNG1 Isoform HMW of Kininogen-1 precursor                        | IYPTVNCQPLGMISLMK      |
| IPI00032328       | KNG1 Isoform HMW of Kininogen-1 precursor                        | KYNSQNQSNQFVLYR        |
| IPI00032328       | KNG1 Isoform HMW of Kininogen-1 precursor                        | YEIKEGDCPVQSGK         |
| IPI00032328       | KNG1 Isoform HMW of Kininogen-1 precursor                        | KIYPTVNCQPLGMISLMK     |
| IPI00033466       | C-type lectin domain family 11 member A precursor                | AALAPYNWPVWLGVHNR      |
| IPI00033466       | C-type lectin domain family 11 member A precursor                | LAGLDAGLHQLHVR         |
| IPI00034319       | Divalent cation tolerant protein CUTA                            | TQSSLVPALTDVFR         |
| IPI00034319       | Divalent cation tolerant protein CUTA                            | LAACVNLIPIQITSYEWK     |
| IPI00044369       | PLXDC2 Isoform 1 of Plexin domain-containing protein 2 precursor | EIPVLVTQISSTNHPVK      |
| IPI00044369       | PLXDC2 Isoform 1 of Plexin domain-containing protein 2 precursor | VGLSDAFVVVHR           |
| IPI00064667       | CNDP1 Beta-Ala-His dipeptidase precursor                         | ALEQDLPVNIK            |
| IPI00064667       | CNDP1 Beta-Ala-His dipeptidase precursor                         | EWVAIESDSVQPVPR        |
| IPI00064667       | CNDP1 Beta-Ala-His dipeptidase precursor                         | VFQYIDLHQDEFVQTLK      |
| IPI00064667       | CNDP1 Beta-Ala-His dipeptidase precursor                         | TVFGTEPDMIR            |
| IPI00064667       | CNDP1 Beta-Ala-His dipeptidase precursor                         | GATDNKGPVLAWINAVSAFR   |
| IPI00064667       | CNDP1 Beta-Ala-His dipeptidase precursor                         | MMAVAADTLQR            |
| IPI00064667       | CNDP1 Beta-Ala-His dipeptidase precursor                         | SVVLIPLGAVDDGEHSQNEK   |
| IPI00064667       | CNDP1 Beta-Ala-His dipeptidase precursor                         | YPSLSIHGIEGAFDEPGTK    |
| IPI00064667       | CNDP1 Beta-Ala-His dipeptidase precursor                         | GNSYFMVEVK             |
| IPI00064667       | CNDP1 Beta-Ala-His dipeptidase precursor                         | GDGWLTDPPVVLTEVDGK     |
| IPI00064667       | CNDP1 Beta-Ala-His dipeptidase precursor                         | HLEDVFSK               |

| IPI Accession No. | Protein Description                      | Peptide Sequence           |
|-------------------|------------------------------------------|----------------------------|
| IPI00064667       | CNDP1 Beta-Ala-His dipeptidase precursor | AIHLDLEEYR                 |
| IPI00064667       | CNDP1 Beta-Ala-His dipeptidase precursor | MFQEIVHK                   |
| IPI00064667       | CNDP1 Beta-Ala-His dipeptidase precursor | HLEDVFSKR                  |
| IPI00064667       | CNDP1 Beta-Ala-His dipeptidase precursor | GPVLAWINAVSAFR             |
| IPI00064667       | CNDP1 Beta-Ala-His dipeptidase precursor | FIIEGMEEAGSVALEELVEK       |
| IPI00159927       | Neurocan core protein precursor          | ELGGEVIFYVGPARG            |
| IPI00159927       | Neurocan core protein precursor          | GTVLCGPPPAVENASLIGAR       |
| IPI00159927       | Neurocan core protein precursor          | YALTFAEAQEACR              |
| IPI00159927       | Neurocan core protein precursor          | RNPQELYDVYCFAR             |
| IPI00163187       | Fascin                                   | LVARPEPATGYTLEFR           |
| IPI00166729       | AZGP1 alpha-2-glycoprotein 1, zinc       | QVEGMEDWK                  |
| IPI00166729       | AZGP1 alpha-2-glycoprotein 1, zinc       | EIPAWVPFDPAQAQITK          |
| IPI00166729       | AZGP1 alpha-2-glycoprotein 1, zinc       | AYLEEECPATLR               |
| IPI00166729       | AZGP1 alpha-2-glycoprotein 1, zinc       | YSLTYIYTGLSK               |
| IPI00166729       | AZGP1 alpha-2-glycoprotein 1, zinc       | CLAYDFYPGK                 |
| IPI00166729       | AZGP1 alpha-2-glycoprotein 1, zinc       | YYVDGKDYIEFNK              |
| IPI00166729       | AZGP1 alpha-2-glycoprotein 1, zinc       | AREDIFMETLK                |
| IPI00166729       | AZGP1 alpha-2-glycoprotein 1, zinc       | AYLEEECPATLRK              |
| IPI00166729       | AZGP1 alpha-2-glycoprotein 1, zinc       | AGEVQPELRL                 |
| IPI00166729       | AZGP1 alpha-2-glycoprotein 1, zinc       | QKWEAEPVYVQR               |
| IPI00166729       | AZGP1 alpha-2-glycoprotein 1, zinc       | IDVHWTR                    |
| IPI00166729       | AZGP1 alpha-2-glycoprotein 1, zinc       | QDPPSVVVTSHQAPGEK          |
| IPI00166729       | AZGP1 alpha-2-glycoprotein 1, zinc       | WEAEPVYVQR                 |
| IPI00166729       | AZGP1 alpha-2-glycoprotein 1, zinc       | QVEGMEDWKQDSQLQK           |
| IPI00166729       | AZGP1 alpha-2-glycoprotein 1, zinc       | EIPAWVPFD                  |
| IPI00166729       | AZGP1 alpha-2-glycoprotein 1, zinc       | HVEDVPAFQALGSLNDLQFFR      |
| IPI00168728       | FLJ00385 protein (Fragment)              | NQVSLTCLVK                 |
| IPI00168728       | FLJ00385 protein (Fragment)              | STSGGTAALGCLVK             |
| IPI00168728       | FLJ00385 protein (Fragment)              | GPSVFLAPCSR                |
| IPI00168728       | FLJ00385 protein (Fragment)              | EPQVYTLPPSR                |
| IPI00168728       | FLJ00385 protein (Fragment)              | EPQVYTLPPSREEMTK           |
| IPI00168728       | FLJ00385 protein (Fragment)              | VVSVLTVLHQDWLNGK           |
| IPI00168728       | FLJ00385 protein (Fragment)              | WYVDGVEVHNAK               |
| IPI00168728       | FLJ00385 protein (Fragment)              | ALPAPIEK                   |
| IPI00168728       | FLJ00385 protein (Fragment)              | CPAPELLGGPSVFLFPPKPK       |
| IPI00168728       | FLJ00385 protein (Fragment)              | WQQGNIFSCVMHEALHNR         |
| IPI00168728       | FLJ00385 protein (Fragment)              | GQPREPQVYTLPPSREEMTK       |
| IPI00168728       | FLJ00385 protein (Fragment)              | DYFPEPVTVSWNSGALTSQGVH     |
| IPI00168728       | FLJ00385 protein (Fragment)              | NQVSLTCL                   |
| IPI00168728       | FLJ00385 protein (Fragment)              | DYFPEPVTVSWNSGALTSQGVHTFPA |
| IPI00168728       | FLJ00385 protein (Fragment)              | TPLGDTHTTCPR               |
| IPI00168728       | FLJ00385 protein (Fragment)              | SCDTPPPCPR                 |
| IPI00171411       | Golgi phosphoprotein 2                   | DQLVIPDGQEEEQEAAGEGR       |
| IPI00171473       | Spondin-1                                | VEGDPDFYKPGTSYR            |
| IPI00171473       | Spondin-1                                | AAPSAEFSVDR                |
| IPI00171678       | Dopamine beta-hydroxylase                | VVSVHPGDVLITSCYNTEDR       |
| IPI00171678       | Dopamine beta-hydroxylase                | GQIHLDPQQDYQLLQVQR         |
| IPI00176221       | Neuronal growth regulator 1 precursor    | DQAGEYECSAENDVSFPDVR       |
| IPI00176221       | Neuronal growth regulator 1 precursor    | VVNFAPTIQEI                |
| IPI00176427       | Cell adhesion molecule 4 precursor       | EQAVEGGVELSCLVPR           |
| IPI00176427       | Cell adhesion molecule 4 precursor       | QTQYVLDVQYSPTAR            |
| IPI00176427       | Cell adhesion molecule 4 precursor       | DDGGHICEAQNQALPSGH         |
| IPI00177535       | Probable cation-transporting ATPase 13A2 | DTVEGDLSSLGLLVMR           |
| IPI00177535       | Probable cation-transporting ATPase 13A2 | SQAAVGAVPEGAWK             |
| IPI00177543       | Peptidylglycine alpha-amidating          | IPVDEEAFVIDFKPR            |



| IPI Accession No. | Protein Description                                                          | Peptide Sequence                  |
|-------------------|------------------------------------------------------------------------------|-----------------------------------|
| IPI00177543       | Peptidylglycine alpha-amidating                                              | REEEEVLDQGFYSLLSK                 |
| IPI00177543       | Peptidylglycine alpha-amidating                                              | GSGGLNLGNFFASR                    |
| IPI00177543       | Peptidylglycine alpha-amidating                                              | EGPVLILGR                         |
| IPI00177543       | Peptidylglycine alpha-amidating                                              | DNNKDCSGVSLHLTR                   |
| IPI00177543       | Peptidylglycine alpha-amidating                                              | GDHVWDGNSFDSK                     |
| IPI00179298       | E3 ubiquitin-protein ligase HUWE1                                            | HASGGSTVHIHPQAAPVVC               |
| IPI00179330       | Ubiquitin-40S ribosomal protein S27a                                         | ESTLHLVLR                         |
| IPI00179330       | Ubiquitin-40S ribosomal protein S27a                                         | TITLEVEPSDTIENVK                  |
| IPI00180154       | Isoform 1 of Ataxin-2                                                        | TSPSGGTWSSVSVGVPR                 |
| IPI00180154       | Isoform 1 of Ataxin-2                                                        | NGGIYEGVFK                        |
| IPI00183445       | Isoform 1 of Latrophilin-1 precursor                                         | ELACEGYPIELR                      |
| IPI00183445       | Isoform 1 of Latrophilin-1 precursor                                         | TQCVVVAGSDAFPDPGTYK               |
| IPI00183445       | Isoform 1 of Latrophilin-1 precursor                                         | DNQLYVWNNYFVVR                    |
| IPI00183445       | Isoform 1 of Latrophilin-1 precursor                                         | IYVMPWIPYR                        |
| IPI00215715       | Isoform A of Calcium/calmodulin-dependent protein kinase type II alpha chain | VTEQLIEAISNGDFESYTK               |
| IPI00215720       | Isoform 1 of Fragile X mental retardation 1 protein                          | ENSTHFSQPNSTKVQR                  |
| IPI00215983       | Carbonic anhydrase 1                                                         | ESISVSSEQLAQFR                    |
| IPI00215983       | Carbonic anhydrase 1                                                         | LYPIANGNNQSPVDIK                  |
| IPI00215983       | Carbonic anhydrase 1                                                         | GGPFSDSYR                         |
| IPI00215983       | Carbonic anhydrase 1                                                         | HDTSLKPISVSNPATAK                 |
| IPI00215983       | Carbonic anhydrase 1                                                         | ADGLAVIGVLMK                      |
| IPI00216171       | ENO2 Gamma-enolase                                                           | AAVPSGASTGIYEALER                 |
| IPI00216171       | ENO2 Gamma-enolase                                                           | VNQIGSVTEAIQACK                   |
| IPI00216171       | ENO2 Gamma-enolase                                                           | DATNVGDEGGFAPNILENSEALELVK        |
| IPI00216691       | Profilin-1                                                                   | TFVNITPAEVLVGVGK                  |
| IPI00217882       | Sortilin precursor                                                           | LDAPPPAAPLPR                      |
| IPI00217882       | Sortilin precursor                                                           | ADLGALELWR                        |
| IPI00217963       | Keratin 16                                                                   | APSTYGGGLSVSSR                    |
| IPI00217963       | Keratin 16                                                                   | LAADDFR                           |
| IPI00217963       | Keratin 16                                                                   | VLDELTLAR                         |
| IPI00217963       | Keratin 16                                                                   | ASLENSLEETKGR                     |
| IPI00217963       | Keratin 16                                                                   | TEELNKEVASNSELVQSSR               |
| IPI00217963       | Keratin 16                                                                   | ASLENSLEETK                       |
| IPI00217963       | Keratin 16                                                                   | EVASNSELVQSSR                     |
| IPI00217963       | Keratin 16                                                                   | GSCGIGGGIGGGSSR                   |
| IPI00217963       | Keratin 16                                                                   | ISSVLAGGSCR                       |
| IPI00218192       | ITIH4 Isoform 2 of Inter-alpha-trypsin inhibitor heavy chain H4 precursor    | GPDVLTATVSGK                      |
| IPI00218192       | ITIH4 Isoform 2 of Inter-alpha-trypsin inhibitor heavy chain H4 precursor    | QGPVNLLSDPEQGVETGQYER             |
| IPI00218192       | ITIH4 Isoform 2 of Inter-alpha-trypsin inhibitor heavy chain H4 precursor    | ETLFSVMPGLK                       |
| IPI00218192       | ITIH4 Isoform 2 of Inter-alpha-trypsin inhibitor heavy chain H4 precursor    | NPLVWVHASPEHVVVTR                 |
| IPI00218192       | ITIH4 Isoform 2 of Inter-alpha-trypsin inhibitor heavy chain H4 precursor    | SPEQQETVLDGNLIIR                  |
| IPI00218192       | ITIH4 Isoform 2 of Inter-alpha-trypsin inhibitor heavy chain H4 precursor    | LQDRGPDVLTATVSGK                  |
| IPI00218192       | ITIH4 Isoform 2 of Inter-alpha-trypsin inhibitor heavy chain H4 precursor    | WKETLFSVMPGLK                     |
| IPI00218192       | ITIH4 Isoform 2 of Inter-alpha-trypsin inhibitor heavy chain H4 precursor    | ANTVQEATFQMELPK                   |
| IPI00218192       | ITIH4 Isoform 2 of Inter-alpha-trypsin inhibitor heavy chain H4 precursor    | AGFSWIEVTFK                       |
| IPI00218192       | ITIH4 Isoform 2 of Inter-alpha-trypsin inhibitor heavy chain H4 precursor    | QLGLPGPPDVPDHAAHYHPFR             |
| IPI00218192       | ITIH4 Isoform 2 of Inter-alpha-trypsin inhibitor heavy chain H4 precursor    | RLDYQEGPPGVEISCWSVEL              |
| IPI00218192       | ITIH4 Isoform 2 of Inter-alpha-trypsin inhibitor heavy chain H4 precursor    | MNFRPGVLSR                        |
| IPI00218192       | ITIH4 Isoform 2 of Inter-alpha-trypsin inhibitor heavy chain H4 precursor    | EKAEAQAQYSAAVAK                   |
| IPI00218192       | ITIH4 Isoform 2 of Inter-alpha-trypsin inhibitor heavy chain H4 precursor    | ITFELVYEELK                       |
| IPI00218725       | Laminin subunit alpha-2 isoform b precursor                                  | SGFFNLQEDNWK                      |
| IPI00218725       | Laminin subunit alpha-2 isoform b precursor                                  | LADEINSIIDYVEDIQTK                |
| IPI00218725       | Laminin subunit alpha-2 isoform b precursor                                  | TAVADNLLFYLGSAK                   |
| IPI00218733       | Superoxide dismutase                                                         | GLTEGLHGFBVHEFGDNTAGCTSAGPHFNPLSR |
| IPI00219018       | Glyceraldehyde-3-phosphate dehydrogenase                                     | GALQNIIPASTGAAK                   |

| IPI Accession No. | Protein Description                               | Peptide Sequence            |
|-------------------|---------------------------------------------------|-----------------------------|
| IPI00219018       | Glyceraldehyde-3-phosphate dehydrogenase          | VPTANVSVVDLTCR              |
| IPI00219018       | Glyceraldehyde-3-phosphate dehydrogenase          | IISNASCTTNCLAPLAK           |
| IPI00219018       | Glyceraldehyde-3-phosphate dehydrogenase          | LIVINGNPITIFQER             |
| IPI00219018       | Glyceraldehyde-3-phosphate dehydrogenase          | LISWYDNEFGYSNR              |
| IPI00219029       | Aspartate aminotransferase, cytoplasmic           | IVASTLSNPelfEewTGNVK        |
| IPI00219217       | LDHB L-lactate dehydrogenase B chain              | LIAPVAEEEEATVPNNK           |
| IPI00219217       | LDHB L-lactate dehydrogenase B chain              | SLADELALVDVLEDK             |
| IPI00219217       | LDHB L-lactate dehydrogenase B chain              | IVADKDYSVTANSK              |
| IPI00219217       | LDHB L-lactate dehydrogenase B chain              | GLTSVINQK                   |
| IPI00219217       | LDHB L-lactate dehydrogenase B chain              | GEMMDLQHGSFLQTPK            |
| IPI00219217       | LDHB L-lactate dehydrogenase B chain              | SLADELALVDVLEDKLK           |
| IPI00219217       | LDHB L-lactate dehydrogenase B chain              | VIGSGCNLDSAR                |
| IPI00219301       | Myristoylated alanine-rich C-kinase substrate     | GEAAAERPGEAAVASSPSK         |
| IPI00219365       | Moesin                                            | IGFPWSEIR                   |
| IPI00219365       | Moesin                                            | EGILNDDIYCPPETAVLLASYAVQSK  |
| IPI00219446       | PEBP1 Phosphatidylethanolamine-binding protein 1  | NRPTSISWDGLDLSGK            |
| IPI00219446       | PEBP1 Phosphatidylethanolamine-binding protein 1  | LYTLVLTDPDAPSRK             |
| IPI00219446       | PEBP1 Phosphatidylethanolamine-binding protein 1  | YVWLVEYQDRPLK               |
| IPI00219703       | Parvalbumin alpha                                 | SGFIEDELGFILK               |
| IPI00220026       | Acetylcholinesterase                              | VGAFGFLALPGSR               |
| IPI00220271       | Keratin 1                                         | DPDEPVLLEEPVVLALAEK         |
| IPI00220327       | Keratin 1                                         | SLNNQFASFIDK                |
| IPI00220327       | Keratin 1                                         | LNDELEDALQQAK               |
| IPI00220327       | Keratin 1                                         | THNLEPYFESFINNLR            |
| IPI00220327       | Keratin 1                                         | SLDLDSIIAEVK                |
| IPI00220327       | Keratin 1                                         | QISNLQQSISDAEQR             |
| IPI00220327       | Keratin 1                                         | YEELQITAGR                  |
| IPI00220327       | Keratin 1                                         | NKLNDELEDALQQAK             |
| IPI00220327       | Keratin 1                                         | TNAENEFVTIK                 |
| IPI00220327       | Keratin 1                                         | TNAENEFVTIKK                |
| IPI00220327       | Keratin 1                                         | NKLNDELEDALQAKEDLAR         |
| IPI00220327       | Keratin 1                                         | TLLEGESR                    |
| IPI00220361       | Calbindin                                         | TFVDQYQGR                   |
| IPI00220361       | Calbindin                                         | AFELYDQDNGYIDENELDALLK      |
| IPI00220361       | Calbindin                                         | LFDSNNDGKLELETEMAR          |
| IPI00220361       | Calbindin                                         | ELQNLIQELQQAR               |
| IPI00220361       | Calbindin                                         | AGLELSPEMK                  |
| IPI00220562       | Neuronal pentraxin-1 precursor                    | KLTPGEVYNLATCSTK            |
| IPI00220562       | Neuronal pentraxin-1 precursor                    | TPAAETLSQLGQTLQSLK          |
| IPI00220562       | Neuronal pentraxin-1 precursor                    | DNRPGDKFQLTFPLR             |
| IPI00220644       | PKM2 Isoform M1 of Pyruvate kinase isozymes M1/M2 | LDIDSPPIRAR                 |
| IPI00220644       | PKM2 Isoform M1 of Pyruvate kinase isozymes M1/M2 | CDENILWLDYK                 |
| IPI00220644       | PKM2 Isoform M1 of Pyruvate kinase isozymes M1/M2 | NTGIICITIGPASR              |
| IPI00220644       | PKM2 Isoform M1 of Pyruvate kinase isozymes M1/M2 | GDYPLEAVR                   |
| IPI00241562       | RELN reelin isoform a                             | FSYSDSPSIIVLYAK             |
| IPI00241562       | RELN reelin isoform a                             | ITIQLPDHVSSSATQFR           |
| IPI00241562       | RELN reelin isoform a                             | VPSLVSVVINPELQTPATK         |
| IPI00241562       | RELN reelin isoform a                             | ITYPLPESLVGNPVR             |
| IPI00241562       | RELN reelin isoform a                             | LLEHYSYLSYHEPR              |
| IPI00241562       | RELN reelin isoform a                             | KEHITLDTLSYSSYK             |
| IPI00242956       | FCGBP IgGFc-binding protein precursor             | VAYDLVYYVR                  |
| IPI00242956       | FCGBP IgGFc-binding protein precursor             | VNGVLTALPVSVADGR            |
| IPI00242956       | FCGBP IgGFc-binding protein precursor             | VPSSYAEALCGLCGNFNGDPADDLALR |
| IPI00242956       | FCGBP IgGFc-binding protein precursor             | LPVVLANGQIR                 |
| IPI00242956       | FCGBP IgGFc-binding protein precursor             | APGWDPLCWDECR               |

| IPI Accession No. | Protein Description                         | Peptide Sequence           |
|-------------------|---------------------------------------------|----------------------------|
| IPI00242956       | FCGBP IgGFc-binding protein precursor       | SVPGCEGVALVVAQTK           |
| IPI00242956       | FCGBP IgGFc-binding protein precursor       | VVAEVQICHGK                |
| IPI00242956       | FCGBP IgGFc-binding protein precursor       | FAVLQENVAWGNR              |
| IPI00242956       | FCGBP IgGFc-binding protein precursor       | LTYNHGGITGSR               |
| IPI00242956       | FCGBP IgGFc-binding protein precursor       | SRLPVSLSEGR                |
| IPI00242956       | FCGBP IgGFc-binding protein precursor       | SLAAAYTAACQAAGVAVKPWR      |
| IPI00242956       | FCGBP IgGFc-binding protein precursor       | VAVIVSNDHAGK               |
| IPI00242956       | FCGBP IgGFc-binding protein precursor       | NEVTYDPYLVLPDVAAYCPAYVVK   |
| IPI00247243       | Hypothetical protein                        | EGDDIEMPCAFR               |
| IPI00289501       | Neurosecretory protein VGF precursor        | APLPPPAPSQFQR              |
| IPI00289501       | Neurosecretory protein VGF precursor        | VNLESPGPER                 |
| IPI00289501       | Neurosecretory protein VGF precursor        | RPESALLGGSEAGER            |
| IPI00289501       | Neurosecretory protein VGF precursor        | LLQQGLAQVEAGR              |
| IPI00289501       | Neurosecretory protein VGF precursor        | THLGEALAPLSK               |
| IPI00289501       | Neurosecretory protein VGF precursor        | VGEDEEEAAEAEAEAEAER        |
| IPI00289501       | Neurosecretory protein VGF precursor        | NSEPQDEGELFQGVDR           |
| IPI00289501       | Neurosecretory protein VGF precursor        | SPQPPPPAPAPARDEL P         |
| IPI00289501       | Neurosecretory protein VGF precursor        | MPDSGGLPETHK               |
| IPI00289501       | Neurosecretory protein VGF precursor        | LADLASDLLLQYLLQGGAR        |
| IPI00290078       | Keratin, type II cytoskeletal 4             | DVDAAAYLNKVELEAK           |
| IPI00290078       | Keratin, type II cytoskeletal 4             | RVELEAALQQA K              |
| IPI00290078       | Keratin, type II cytoskeletal 4             | NLDLDSIIAEVR               |
| IPI00290078       | Keratin, type II cytoskeletal 4             | TAAENDFVVLKK               |
| IPI00290078       | Keratin, type II cytoskeletal 4             | VQQLQISVDQHGDNLK           |
| IPI00290078       | Keratin, type II cytoskeletal 4             | NLEPLFETYLSVLR             |
| IPI00290078       | Keratin, type II cytoskeletal 4             | TMQDSVEDFK                 |
| IPI00290078       | Keratin, type II cytoskeletal 4             | DVDAAAYLNK                 |
| IPI00290078       | Keratin, type II cytoskeletal 4             | EYQELMSVK                  |
| IPI00290078       | Keratin, type II cytoskeletal 4             | KLEGE EYR                  |
| IPI00290078       | Keratin, type II cytoskeletal 4             | QCQTLQVSVADAEQR            |
| IPI00290078       | Keratin, type II cytoskeletal 4             | GFSCGSAIVGGGKR             |
| IPI00290078       | Keratin, type II cytoskeletal 4             | RVELEAALQQA KEELAR         |
| IPI00290078       | Keratin, type II cytoskeletal 4             | LLEGE EYR                  |
| IPI00290085       | Cell division CyCle 2-like 2 isoform 1      | TGFPEDVYSAVLSK             |
| IPI00290085       | Cell division CyCle 2-like 2 isoform 1      | DVHEGQPLLNVK               |
| IPI00290085       | Cell division CyCle 2-like 2 isoform 1      | FLIYAQDKETQEK              |
| IPI00290085       | Cell division CyCle 2-like 2 isoform 1      | LSLKPTL TEESVK             |
| IPI00290085       | Cell division CyCle 2-like 2 isoform 1      | ESAEVEEIVFPR               |
| IPI00290456       | Intercellular adhesion molecule 5 precursor | TVTVGVEYRPVVAE             |
| IPI00290456       | Intercellular adhesion molecule 5 precursor | SWTWPEGPEQTLR              |
| IPI00290857       | Keratin, type II cytoskeletal 3             | TAAENEFVTLKK               |
| IPI00290857       | Keratin, type II cytoskeletal 3             | TAAENEFVTLK                |
| IPI00290857       | Keratin, type II cytoskeletal 3             | FASFIDKVR                  |
| IPI00291136       | Collagen alpha-1(VI) chain precursor        | LLLFSDGNSQGATPAAIEK        |
| IPI00291136       | Collagen alpha-1(VI) chain precursor        | TAEYDVAYGESHLFR            |
| IPI00291136       | Collagen alpha-1(VI) chain precursor        | GLEQLLVGGSHLK              |
| IPI00291136       | Collagen alpha-1(VI) chain precursor        | VFSVAITPDHLEPR             |
| IPI00291136       | Collagen alpha-1(VI) chain precursor        | LSIIATDHTYR                |
| IPI00291136       | Collagen alpha-1(VI) chain precursor        | DTTPLNLVLCSPGIQVSVGIK      |
| IPI00291136       | Collagen alpha-1(VI) chain precursor        | ENYAE LLEDAFLK             |
| IPI00291136       | Collagen alpha-1(VI) chain precursor        | DVDFDFIPGSDQLNISCQGLAPSQGR |
| IPI00291867       | CFI Complement factor I precursor           | AQLGDLPWQVAIK              |
| IPI00291867       | CFI Complement factor I precursor           | VFSLQWGEVK                 |
| IPI00291867       | CFI Complement factor I precursor           | ADSPMDDFFQC VNGK           |
| IPI00291867       | CFI Complement factor I precursor           | ACDGINDCGDQSDLELCK         |

| IPI Accession No. | Protein Description                             | Peptide Sequence           |
|-------------------|-------------------------------------------------|----------------------------|
| IPI00291867       | CFI Complement factor I precursor               | HGNTDSEGIVEVK              |
| IPI00291867       | CFI Complement factor I precursor               | GLETSLAECTFTK              |
| IPI00291867       | CFI Complement factor I precursor               | EANVACLDLGFGQADTQR         |
| IPI00291867       | CFI Complement factor I precursor               | YQIWTTVVDWIHPDLK           |
| IPI00291867       | CFI Complement factor I precursor               | YQIWTTVVDWIHPDLKR          |
| IPI00291867       | CFI Complement factor I precursor               | SLECLHPGTK                 |
| IPI00291867       | CFI Complement factor I precursor               | VANYFDWISYHVGRPF           |
| IPI00292071       | Secretogranin III precursor                     | YGTISPEEGVSYLENLDEMIALQTK  |
| IPI00292071       | Secretogranin III precursor                     | ELSAERPLNEQIAEAEDKIKK      |
| IPI00292071       | Secretogranin III precursor                     | SSPLDNKLNVEDVDSTK          |
| IPI00292071       | Secretogranin III precursor                     | TEAYLEAIRK                 |
| IPI00292071       | Secretogranin III precursor                     | EKETLITIMK                 |
| IPI00292071       | Secretogranin III precursor                     | GILDKEEAIAIKR              |
| IPI00292071       | Secretogranin III precursor                     | ELSAERPLNEQIAEAEDK         |
| IPI00292071       | Secretogranin III precursor                     | TYSEDNFEELQYFPNFYALLK      |
| IPI00293836       | Isoform 3 of Cell adhesion molecule 2 precursor | AYLTVLGVPEKPKISGF          |
| IPI00295542       | Nucleobindin 1 precursor                        | YLQEVIDVLETDGHFR           |
| IPI00295542       | Nucleobindin 1 precursor                        | LPEVEVPQHL                 |
| IPI00295542       | Nucleobindin 1 precursor                        | EVWEELDGLDPNR              |
| IPI00295741       | Cathepsin B precursor                           | LCGTFGLGGPKPPQR            |
| IPI00295741       | Cathepsin B precursor                           | GQDHCIESEVVAGIPR           |
| IPI00295741       | Cathepsin B precursor                           | TDQYWEKI                   |
| IPI00295741       | Cathepsin B precursor                           | DQGSCGSCWAFGAVEAISDR       |
| IPI00295741       | Cathepsin B precursor                           | KGLVSGGLYESHVGCPRY         |
| IPI00295741       | Cathepsin B precursor                           | NGPVEGAFSVYSDFLLYK         |
| IPI00295741       | Cathepsin B precursor                           | VMFTEDLKLPAFSDAR           |
| IPI00296165       | Complement C1r subcomponent precursor           | LPVANPQACENWLR             |
| IPI00296165       | Complement C1r subcomponent precursor           | YTTTMGVNTYK                |
| IPI00296165       | Complement C1r subcomponent precursor           | ESEQGVYTCTAQGIWK           |
| IPI00296165       | Complement C1r subcomponent precursor           | WILTAAHTLYPK               |
| IPI00296165       | Complement C1r subcomponent precursor           | VLNYVDWIK                  |
| IPI00296165       | Complement C1r subcomponent precursor           | TLDEFTHIQLQPQYQFR          |
| IPI00296165       | Complement C1r subcomponent precursor           | LVFQQFDLEPSEGCFYDYVK       |
| IPI00296165       | Complement C1r subcomponent precursor           | QDACQGDSDGGVFAVR           |
| IPI00296165       | Complement C1r subcomponent precursor           | FCGQLGSPLGNPPGK            |
| IPI00296165       | Complement C1r subcomponent precursor           | FCGQLGSPLGNPPGKK           |
| IPI00296165       | Complement C1r subcomponent precursor           | MGNFPWQVFTNIHGR            |
| IPI00296165       | Complement C1r subcomponent precursor           | NIGEFCK                    |
| IPI00296165       | Complement C1r subcomponent precursor           | LFGEVTSPLFPK               |
| IPI00296165       | Complement C1r subcomponent precursor           | MDVFSQNMFCAGHPSLK          |
| IPI00296165       | Complement C1r subcomponent precursor           | CLPVCCKPVPVVEQR            |
| IPI00296165       | Complement C1r subcomponent precursor           | QRPPDLDTSSNAVLLFFTFDESGBSR |
| IPI00296777       | SPARC-like protein 1 precursor                  | SIPTCTDFEVIQFPLR           |
| IPI00296777       | SPARC-like protein 1 precursor                  | LENTDFLAPGVSSFTDSNQESITK   |
| IPI00296777       | SPARC-like protein 1 precursor                  | LLAGDHPIDLLR               |
| IPI00296777       | SPARC-like protein 1 precursor                  | HIQETEQSQEGK               |
| IPI00296777       | SPARC-like protein 1 precursor                  | FFEECDPNKDK                |
| IPI00296777       | SPARC-like protein 1 precursor                  | TVSEALLMEPTDDGNTTPR        |
| IPI00296777       | SPARC-like protein 1 precursor                  | HSASDDYFIPSQAFLE           |
| IPI00296777       | SPARC-like protein 1 precursor                  | NILMQLYEANSEHAGYLNK        |
| IPI00296777       | SPARC-like protein 1 precursor                  | HSASDDYFIPSQAF             |
| IPI00296777       | SPARC-like protein 1 precursor                  | VHAVDSCMSFQCK              |
| IPI00296777       | SPARC-like protein 1 precursor                  | GHQLQLDYFGACK              |
| IPI00296777       | SPARC-like protein 1 precursor                  | TGLEAISNHKETEEL            |
| IPI00296777       | SPARC-like protein 1 precursor                  | HSASDDYFIPSQA              |

| IPI Accession No. | Protein Description                             | Peptide Sequence                  |
|-------------------|-------------------------------------------------|-----------------------------------|
| IPI00296777       | SPARC-like protein 1 precursor                  | VHENENIGTTEPGEHQEAK               |
| IPI00297284       | Insulin-like growth factor binding protein 2    | LAACGPPPVAPPAVAAVAGGAR            |
| IPI00297284       | Insulin-like growth factor binding protein 2    | GDPECHLFYNEQEAR                   |
| IPI00297284       | Insulin-like growth factor binding protein 2    | TPCQQELDQVLER                     |
| IPI00297714       | Gamma-synuclein                                 | TVEEAENIAVTSGVVR                  |
| IPI00298237       | Isoform 1 of Tripeptidyl-peptidase 1 precursor  | LSELVQAVSDPSSPYGK                 |
| IPI00298281       | Laminin subunit gamma-1 precursor               | SQECYFDPELYR                      |
| IPI00298281       | Laminin subunit gamma-1 precursor               | TGGDEQQALCTDEFSDISPLTGGNVAFSTLEGR |
| IPI00298497       | Fibrinogen beta chain precursor                 | NYCGLPGEYWLGNDK                   |
| IPI00298497       | Fibrinogen beta chain precursor                 | DNENVVNEYSSELEK                   |
| IPI00298497       | Fibrinogen beta chain precursor                 | EDGGGWYNR                         |
| IPI00298497       | Fibrinogen beta chain precursor                 | YYWGGQYTWDMAK                     |
| IPI00298497       | Fibrinogen beta chain precursor                 | TPCTVSCNIPVVS GK                  |
| IPI00298497       | Fibrinogen beta chain precursor                 | HQLYIDETVNSNIPTNLR                |
| IPI00298497       | Fibrinogen beta chain precursor                 | LES DVSAQMEYCR                    |
| IPI00298497       | Fibrinogen beta chain precursor                 | REEAPSLRPAPPISGGGYR               |
| IPI00298497       | Fibrinogen beta chain precursor                 | AHYGGFTVQNEANK                    |
| IPI00298497       | Fibrinogen beta chain precursor                 | DNDGWLTS DPR                      |
| IPI00298497       | Fibrinogen beta chain precursor                 | MGPTELLIEMEDWK                    |
| IPI00298497       | Fibrinogen beta chain precursor                 | NSVDELNNNVEAVSQTSSSSFYQMYLLK      |
| IPI00298497       | Fibrinogen beta chain precursor                 | HGTDDGVVWMNWK                     |
| IPI00298497       | Fibrinogen beta chain precursor                 | KREEAPSLRPAPPISGGGYR              |
| IPI00298497       | Fibrinogen beta chain precursor                 | MGPTELLIEMEDWKGDK                 |
| IPI00298497       | Fibrinogen beta chain precursor                 | QGFNGVATNTD GK                    |
| IPI00298497       | Fibrinogen beta chain precursor                 | EEAPSLRPAPPISGGGYR                |
| IPI00298497       | Fibrinogen beta chain precursor                 | KGGTSEMYLIQPDSSVKPYR              |
| IPI00298497       | Fibrinogen beta chain precursor                 | KREEAPSLRPAPPISGGGY               |
| IPI00298547       | Protein DJ-1                                    | EGPYDVVVLPGGNLGAQNLSESAAVK        |
| IPI00298547       | Protein DJ-1                                    | DVVICPDASLEDAKK                   |
| IPI00298547       | Protein DJ-1                                    | GAEEMETVIPVDVMR                   |
| IPI00298828       | Beta-2-glycoprotein 1 precursor                 | TFYEPGEEITYSCKPGYVSR              |
| IPI00298828       | Beta-2-glycoprotein 1 precursor                 | FICPLTGLWPINTLK                   |
| IPI00298828       | Beta-2-glycoprotein 1 precursor                 | TCPKPDDL PFSTVVPLK                |
| IPI00298828       | Beta-2-glycoprotein 1 precursor                 | KFICPLTGLWPINTLK                  |
| IPI00298828       | Beta-2-glycoprotein 1 precursor                 | CSYTEDAQCIDGTIEVPK                |
| IPI00298828       | Beta-2-glycoprotein 1 precursor                 | EHSSLAFWK                         |
| IPI00298828       | Beta-2-glycoprotein 1 precursor                 | VCPFAGILENGAVR                    |
| IPI00298828       | Beta-2-glycoprotein 1 precursor                 | KCSYTEDAQCIDGTIEVPK               |
| IPI00298828       | Beta-2-glycoprotein 1 precursor                 | TFYEPGEEITYSCKPGY                 |
| IPI00298828       | Beta-2-glycoprotein 1 precursor                 | WSPELPVCAPICPPPSIPTFATLR          |
| IPI00298828       | Beta-2-glycoprotein 1 precursor                 | DKATFGCHDGYSLDGPEEIECTK           |
| IPI00298828       | Beta-2-glycoprotein 1 precursor                 | TDASDVKPC                         |
| IPI00298956       | KIAA1061 protein                                | VLQSIGVDPLPAK                     |
| IPI00298971       | VTN Vitronectin precursor                       | DVWGIEGPIDAAFTR                   |
| IPI00298971       | VTN Vitronectin precursor                       | FEDGVLDPDYPR                      |
| IPI00298971       | VTN Vitronectin precursor                       | SIAQYWLGCAPAGHL                   |
| IPI00298971       | VTN Vitronectin precursor                       | GQYCYELDEK                        |
| IPI00298971       | VTN Vitronectin precursor                       | RVDTVDPYPR                        |
| IPI00298971       | VTN Vitronectin precursor                       | DWHGVPGQVDAAMAGR                  |
| IPI00299024       | Brain acid soluble protein 1                    | ESEPQAAAEPAEAK                    |
| IPI00299024       | Brain acid soluble protein 1                    | APEQEQAAPGPAAGGEAPK               |
| IPI00301255       | Hypothetical protein FLJ90835                   | DGEPIDAVPLSEPPAASSGPLQDSRP        |
| IPI00301255       | Hypothetical protein FLJ90835                   | DGEPIDAVPLSEPPAASSGPLQDSR         |
| IPI00301395       | Probable serine carboxypeptidase CPVL precursor | GGGHILPYDQPLR                     |
| IPI00301579       | NPC2 Epididymal secretory protein E1 precursor  | EVNVSPCPTQPCQLSK                  |

| IPI Accession No. | Protein Description                                                                 | Peptide Sequence              |
|-------------------|-------------------------------------------------------------------------------------|-------------------------------|
| IPI00301579       | NPC2 Epididymal secretory protein E1 precursor                                      | TYSYLNKLPVK                   |
| IPI00302641       | Protocadherin Fat 2 precursor                                                       | DVSYQIVEDGSDVSK               |
| IPI00302641       | Protocadherin Fat 2 precursor                                                       | SGSGPYFYSQIR                  |
| IPI00302641       | Protocadherin Fat 2 precursor                                                       | LDPHTGELTTLTALDR              |
| IPI00302641       | Protocadherin Fat 2 precursor                                                       | SEMFAIHPTSGVVTVAGK            |
| IPI00303002       | Protein S100-G                                                                      | NGDGEVSEFEFQVLVK              |
| IPI00303963       | C2 Complement C2 precursor (Fragment)                                               | VLMSVLNDSNR                   |
| IPI00303963       | C2 Complement C2 precursor (Fragment)                                               | LLGMETMAWQEIR                 |
| IPI00303963       | C2 Complement C2 precursor (Fragment)                                               | CPAPVSFENGIYTPR               |
| IPI00303963       | C2 Complement C2 precursor (Fragment)                                               | NQGILEFYGGDIALLK              |
| IPI00303963       | C2 Complement C2 precursor (Fragment)                                               | NDYLDIYAIGVGK                 |
| IPI00304925       | Heat shock 70kDa protein 1A                                                         | ELEQVCNPIISGLYQGAGGPGGGFGAQGP |
| IPI00304962       | Collagen, type I, alpha 2                                                           | GETGPSGPVGPAGAVGPR            |
| IPI00304962       | Collagen, type I, alpha 2                                                           | SLNNQIETLLTPEGSR              |
| IPI00304962       | Collagen, type I, alpha 2                                                           | NSIAYMDEETGNLKK               |
| IPI00305380       | Insulin-like growth factor binding protein 4                                        | THEDLYIIPNCDR                 |
| IPI00305380       | Insulin-like growth factor binding protein 4                                        | CRPPVGCCELVR                  |
| IPI00305380       | Insulin-like growth factor binding protein 4                                        | EDARPVPQGSQSELHR              |
| IPI00305457       | Serpin peptidase inhibitor, clade A (alpha-1 antiproteinase, antitrypsin), member 1 | VFSNGADLSGVTEEAPLK            |
| IPI00305457       | Serpin peptidase inhibitor, clade A (alpha-1 antiproteinase, antitrypsin), member 1 | LSITGTYDLK                    |
| IPI00305457       | Serpin peptidase inhibitor, clade A (alpha-1 antiproteinase, antitrypsin), member 1 | SPLFMGK                       |
| IPI00305457       | Serpin peptidase inhibitor, clade A (alpha-1 antiproteinase, antitrypsin), member 1 | AVLTIDEK                      |
| IPI00305457       | Serpin peptidase inhibitor, clade A (alpha-1 antiproteinase, antitrypsin), member 1 | GTEAAGAMFLEAIPMSIPPEVK        |
| IPI00305457       | Serpin peptidase inhibitor, clade A (alpha-1 antiproteinase, antitrypsin), member 1 | FNKPFVFLMIEQNTK               |
| IPI00305457       | Serpin peptidase inhibitor, clade A (alpha-1 antiproteinase, antitrypsin), member 1 | VFSNGADLSGVTEEAPLKL           |
| IPI00306413       | Tubulin polymerization-promoting protein family member 3                            | QDILDDSGYVSAYK                |
| IPI00328113       | Fibrillin-1 precursor                                                               | SGNCYLDIRPR                   |
| IPI00328113       | Fibrillin-1 precursor                                                               | IKGTQCEDIDECEVFPVCK           |
| IPI00328156       | Amine oxidase [flavin-containing] B                                                 | VNEVERLIHHVK                  |
| IPI00328609       | SERPINA4 Kallistatin precursor                                                      | LGFTDLFSK                     |
| IPI00328609       | SERPINA4 Kallistatin precursor                                                      | FYYLIASETPGK                  |
| IPI00328609       | SERPINA4 Kallistatin precursor                                                      | IAPANADFAFR                   |
| IPI00328609       | SERPINA4 Kallistatin precursor                                                      | IVDLVSELKK                    |
| IPI00328609       | SERPINA4 Kallistatin precursor                                                      | VGSALFLSHNLK                  |
| IPI00328609       | SERPINA4 Kallistatin precursor                                                      | GDATVFFILPNQGK                |
| IPI00328609       | SERPINA4 Kallistatin precursor                                                      | EIEEVLTPPEMLMR                |
| IPI00328609       | SERPINA4 Kallistatin precursor                                                      | GFQHLLHLLNLPGHGLETR           |
| IPI00328609       | SERPINA4 Kallistatin precursor                                                      | FSISGSYVLDQILPR               |
| IPI00328609       | SERPINA4 Kallistatin precursor                                                      | ALWEKPFISSR                   |
| IPI00328609       | SERPINA4 Kallistatin precursor                                                      | LFHTNFYDVTGTLQINDHVK          |
| IPI00328829       | Inter-alpha trypsin inhibitor heavy chain precursor 5 isoform 1                     | AAFFLSYEELLQR                 |
| IPI00329775       | Isoform 1 of Carboxypeptidase B2 precursor                                          | DTGTGFLPER                    |
| IPI00329775       | Isoform 1 of Carboxypeptidase B2 precursor                                          | IAWHVIR                       |
| IPI00334532       | Splice Isoform 2 Of Neural cell adhesion                                            | WMDWNAPQVQYR                  |
| IPI00334627       | Uncharacterized protein ENSP00000329640                                             | TPAQYDASELK                   |
| IPI00334627       | Putative annexin A2-like protein                                                    | GVDEVTVNIVTNR                 |
| IPI00337548       | Cell growth regulator with EF hand domain protein 1                                 | HVEPGEPLASPQEPQAVGR           |
| IPI00337548       | Cell growth regulator with EF hand domain protein 1                                 | ESLDPVQEPGGQAEADGDVPGPR       |
| IPI00374563       | Agrin                                                                               | EAAAYVCLCPGGFSGPHCEK          |
| IPI00374563       | Agrin                                                                               | VLGESPVPHTVLNLK               |
| IPI00375676       | Ferritin                                                                            | TDPHLCDFLETHFLDDEEVK          |
| IPI00375676       | Ferritin                                                                            | LNQALLDLHALGSAR               |
| IPI00375705       | Signal-regulatory protein beta 1                                                    | AKPSAPVVSGPAAR                |
| IPI00375705       | Signal-regulatory protein beta 1                                                    | LTCQVEHDGQPAVSK               |
| IPI00375705       | Signal-regulatory protein beta 1                                                    | ATPQHTVSFTCESHGFSR            |

| IPI Accession No. | Protein Description                                                             | Peptide Sequence               |
|-------------------|---------------------------------------------------------------------------------|--------------------------------|
| IPI00376427       | Neural cell adhesion molecule 2 precursor                                       | LTIYNANIEDAGIYR                |
| IPI00376427       | Neural cell adhesion molecule 2 precursor                                       | ASGSPEPAISWFR                  |
| IPI00376427       | Neural cell adhesion molecule 2 precursor                                       | NIINSDGGPYVCR                  |
| IPI00376427       | Neural cell adhesion molecule 2 precursor                                       | FQEYILALADVSPSPYGVK            |
| IPI00376427       | Neural cell adhesion molecule 2 precursor                                       | FFTCTAIGEPESIDWYNPQGEK         |
| IPI00376427       | Neural cell adhesion molecule 2 precursor                                       | AVDGFTFTEGDK                   |
| IPI00376427       | Neural cell adhesion molecule 2 precursor                                       | MILEIAPTSNDNDFGR               |
| IPI00382470       | Heat shock protein 90kDa alpha (cytosolic), class A member 1 isoform 1          | HSQFIGYPITLFVEK                |
| IPI00383164       | SNC66 protein                                                                   | TFTCTAAYPESK                   |
| IPI00383164       | SNC66 protein                                                                   | QEPSQGTTFVAVTSILR              |
| IPI00383164       | SNC66 protein                                                                   | DASGVTFTWTPSSGK                |
| IPI00383164       | SNC66 protein                                                                   | GDTFSCMVGHEALPLAFTQK           |
| IPI00384938       | Putative uncharacterized protein DKFZp686N02209                                 | GPSVFPLAPSSK                   |
| IPI00384938       | Putative uncharacterized protein DKFZp686N02209                                 | TTPPVLDSDGSFFLYSK              |
| IPI00384938       | Putative uncharacterized protein DKFZp686N02209                                 | EPQVYTLPPSRDELTK               |
| IPI00384938       | Putative uncharacterized protein DKFZp686N02209                                 | FNWYVDGVEVHNAK                 |
| IPI00384938       | Putative uncharacterized protein DKFZp686N02209                                 | TPEVTCVVVDVSHEDPEVK            |
| IPI00384938       | Putative uncharacterized protein DKFZp686N02209                                 | WQQGNVFCSCVMHEGLHNHYTQK        |
| IPI00384998       | Isoform 7 of Neurofascin precursor                                              | LSPYVNYQFR                     |
| IPI00384998       | Isoform 7 of Neurofascin precursor                                              | YPGSVNSAVLR                    |
| IPI00384998       | Isoform 7 of Neurofascin precursor                                              | DQGSYTCVASTELDQDLAK            |
| IPI00385264       | Ig mu heavy chain disease protein                                               | LICQATGFSPR                    |
| IPI00385264       | Ig mu heavy chain disease protein                                               | YVTSAPMPEPQAPGR                |
| IPI00385264       | Ig mu heavy chain disease protein                                               | FTCTVTHIDLPSPLK                |
| IPI00385264       | Ig mu heavy chain disease protein                                               | VSVFVPPR                       |
| IPI00385264       | Ig mu heavy chain disease protein                                               | VFAIPPSFASIFLTK                |
| IPI00385264       | Ig mu heavy chain disease protein                                               | ESDWLQGSMFTCR                  |
| IPI00385264       | Ig mu heavy chain disease protein                                               | VTSTLTIK                       |
| IPI00395783       | Isoform 4 of Latent-transforming growth factor beta-binding protein 4 precursor | FDMPDFEDDGGPYGESEAPAPPGPTR     |
| IPI00395783       | Isoform 4 of Latent-transforming growth factor beta-binding protein 4 precursor | AGPDLASCLDVDECRER              |
| IPI00399007       | IGHG2 Putative uncharacterized protein DKFZp686I04196 (Fragment)                | STSESTAALGCLVK                 |
| IPI00399007       | IGHG2 Putative uncharacterized protein DKFZp686I04196 (Fragment)                | TTPPMLDSDGSFFLYSK              |
| IPI00399007       | IGHG2 Putative uncharacterized protein DKFZp686I04196 (Fragment)                | GLPAPIEK                       |
| IPI00399007       | IGHG2 Putative uncharacterized protein DKFZp686I04196 (Fragment)                | VVSVLTVVHQDWLNGK               |
| IPI00399007       | IGHG2 Putative uncharacterized protein DKFZp686I04196 (Fragment)                | FDPWGQGTLVTVSSASTK             |
| IPI00399007       | IGHG2 Putative uncharacterized protein DKFZp686I04196 (Fragment)                | CCVECPPCAPPVAGPVSFLFPPK        |
| IPI00399007       | IGHG2 Putative uncharacterized protein DKFZp686I04196 (Fragment)                | VVSVLTVVHQDWLNGKEYK            |
| IPI00399007       | IGHG2 Putative uncharacterized protein DKFZp686I04196 (Fragment)                | TPEVTCVVVDVSHEDPEVQFN          |
| IPI00399007       | IGHG2 Putative uncharacterized protein DKFZp686I04196 (Fragment)                | STSESTAALGC                    |
| IPI00410714       | Hemoglobin subunit alpha                                                        | VGAHAGEYGAEALER                |
| IPI00410714       | Hemoglobin subunit alpha                                                        | FLASVSTVLTSK                   |
| IPI00410714       | Hemoglobin subunit alpha                                                        | TYFPFDLSHGSAQVK                |
| IPI00410714       | Hemoglobin subunit alpha                                                        | VADALTNVAHVDDMPNAL             |
| IPI00410714       | Hemoglobin subunit alpha                                                        | KVADALTNVAHVDDMPNALSALSDLHAHK  |
| IPI00418163       | Complement component 4B preproprotein                                           | GSSTWLTAFLVK                   |
| IPI00418163       | Complement component 4B preproprotein                                           | HLVPGAPFLQALVR                 |
| IPI00418163       | Complement component 4B preproprotein                                           | EPFLSCCQFAESLRK                |
| IPI00418262       | Fructose-bisphosphate aldolase C                                                | TPSALAIENANVLR                 |
| IPI00418262       | Fructose-bisphosphate aldolase C                                                | DNAGAATEEFIK                   |
| IPI00418262       | Fructose-bisphosphate aldolase C                                                | ALQASALNAWR                    |
| IPI00418262       | Fructose-bisphosphate aldolase C                                                | TVPPAVPGVTFLSGGQSEEEASFNLNAINR |
| IPI00418262       | Fructose-bisphosphate aldolase C                                                | YTPEIAMATVTALR                 |
| IPI00418262       | Fructose-bisphosphate aldolase C                                                | DNAGAATEEFIKR                  |
| IPI00418262       | Fructose-bisphosphate aldolase C                                                | YTPEIAMATVTALRR                |
| IPI00418262       | Fructose-bisphosphate aldolase C                                                | LSQIGVENTEENRR                 |

| IPI Accession No. | Protein Description                                         | Peptide Sequence               |
|-------------------|-------------------------------------------------------------|--------------------------------|
| IPI00418262       | Fructose-bisphosphate aldolase C                            | LSQIGVENTEENR                  |
| IPI00423461       | Putative uncharacterized protein DKFZp686C02220 (Fragment)  | WLQGSQELPR                     |
| IPI00423461       | Putative uncharacterized protein DKFZp686C02220 (Fragment)  | NFPPSQDASGDLYTTSSQLTLPATQCPDGK |
| IPI00423461       | Putative uncharacterized protein DKFZp686C02220 (Fragment)  | DASGATFTWTPSSGK                |
| IPI00423461       | Putative uncharacterized protein DKFZp686C02220 (Fragment)  | VTMTTDTSTSTAYMELR              |
| IPI00423463       | USP6 Isoform 2 of Ubiquitin carboxyl-terminal hydrolase 6   | VDDTAIYYCAR                    |
| IPI00426051       | Putative uncharacterized protein DKFZp686C15213             | NSLYLQMNSLR                    |
| IPI00428511       | Neurexin-1-beta                                             | FNVTGDDIAIEESNAIINDGK          |
| IPI00428511       | Neurexin-1-beta                                             | NYISNSAQSNQAVVK                |
| IPI00431645       | Haptoglobin-related protein                                 | VTSIQDWVQK                     |
| IPI00431645       | Haptoglobin-related protein                                 | YVMLPVADQDQCIR                 |
| IPI00431645       | Haptoglobin-related protein                                 | SCAVAEYGVYVK                   |
| IPI00431645       | Haptoglobin-related protein                                 | VGYYVSGWGR                     |
| IPI00431645       | Haptoglobin-related protein                                 | SPVGVQPILNEHTFCAGMSK           |
| IPI00431645       | Haptoglobin-related protein                                 | VMPICLPKDYAEVGR                |
| IPI00431645       | Haptoglobin-related protein                                 | DIAPTLTLYVGKK                  |
| IPI00431645       | Haptoglobin-related protein                                 | VVLHPNYSQVDIGLIK               |
| IPI00431645       | Haptoglobin-related protein                                 | SPVGVQPILNEHTFCAGM             |
| IPI00431645       | Haptoglobin-related protein                                 | SPVGVQPILNEHTFC                |
| IPI00442294       | Neurotrimin                                                 | VTVNYPPYISEAK                  |
| IPI00442294       | Neurotrimin                                                 | EQSGDYECASNDVAAPVVR            |
| IPI00442294       | Neurotrimin                                                 | VHLIVQVSPK                     |
| IPI00442294       | Neurotrimin                                                 | GTLQCEASA VPSAEFQWYK           |
| IPI00442294       | Neurotrimin                                                 | AVGFVSEDEYLEIQGTR              |
| IPI00442299       | Neurexin 1-alpha precursor                                  | IQLPVVMHTEAEDVSLR              |
| IPI00442299       | Neurexin 1-alpha precursor                                  | TGSISFDFR                      |
| IPI00442299       | Neurexin 1-alpha precursor                                  | VNDGEWYHVDFQR                  |
| IPI00442299       | Neurexin 1-alpha precursor                                  | LTVNLD CIR                     |
| IPI00442299       | Neurexin 1-alpha precursor                                  | DCSQEDNNVEGLAH                 |
| IPI00451401       | Triosephosphate isomerase                                   | VPADTEVV CAPPTAYIDFAR          |
| IPI00451401       | Triosephosphate isomerase                                   | VVLA YEPVWAIGTGK               |
| IPI00451401       | Triosephosphate isomerase                                   | HVFGESDELIGQK                  |
| IPI00451401       | Triosephosphate isomerase                                   | KQSLGELIGTLNAAK                |
| IPI00453473       | Histone H4                                                  | DNIQGITKPAIR                   |
| IPI00453473       | Histone H4                                                  | ISGLIYEETR                     |
| IPI00455667       | Ig-like domain-containing protein ENSP00000270642 precursor | DGFTSEGEILEISDIQR              |
| IPI00456623       | Splice Isoform 1 Of Brevican core protein                   | EACYGDMDFGPVGR                 |
| IPI00456623       | Splice Isoform 1 Of Brevican core protein                   | YAFSFGAQEACAR                  |
| IPI00456623       | Splice Isoform 1 Of Brevican core protein                   | WEAPQISCVPR                    |
| IPI00456623       | Splice Isoform 1 Of Brevican core protein                   | EYQWIGLNDR                     |
| IPI00456623       | Splice Isoform 1 Of Brevican core protein                   | CEVQH GIDSSDAVEVK              |
| IPI00465248       | ENO1 Isoform alpha-enolase of Alpha-enolase                 | YISPDQLADLYK                   |
| IPI00465248       | ENO1 Isoform alpha-enolase of Alpha-enolase                 | DYPVVSIEDPFDQDDWGAWQK          |
| IPI00465439       | Fructose-bisphosphate aldolase A                            | VNPCIGGVILFHETLYQK             |
| IPI00465439       | Fructose-bisphosphate aldolase A                            | IGEHTPSALAIMENANVLAR           |
| IPI00470427       | Parkin variant SV5,9DEL                                     | VTCEGGNGLGCGYQRRTK             |
| IPI00470427       | Parkinson protein 2, E3 ubiquitin protein ligase (parkin)   | FNSSHGFPVEVDS TISIFLQK         |
| IPI00473011       | Hemoglobin subunit delta                                    | LLVVYPWTQR                     |
| IPI00473011       | Hemoglobin subunit delta                                    | VVAGVANALAHK                   |
| IPI00473011       | Hemoglobin subunit delta                                    | VLGAFSDGLAHLN LK               |
| IPI00473011       | Hemoglobin subunit delta                                    | LHVDPENFR                      |
| IPI00473011       | Hemoglobin subunit delta                                    | KVLGAFSDGLAHLN LK              |
| IPI00473011       | Hemoglobin subunit delta                                    | FFESFGDLSSPD AVMGNPK           |
| IPI00473011       | Hemoglobin subunit delta                                    | VNVDAVGG EALGR                 |
| IPI00473011       | Hemoglobin subunit delta                                    | EFTPQMQAAYQK                   |



| IPI Accession No. | Protein Description                                | Peptide Sequence       |
|-------------------|----------------------------------------------------|------------------------|
| IPI00473011       | Hemoglobin subunit delta                           | LLGNVLCVRLAR           |
| IPI00473011       | Hemoglobin subunit delta                           | VVAGVANALAHKYH         |
| IPI00477597       | Isoform 1 of Haptoglobin-related protein precursor | TEGDGVYTLNDKK          |
| IPI00477597       | Isoform 1 of Haptoglobin-related protein precursor | TEGDGVYTLNDK           |
| IPI00477597       | Isoform 1 of Haptoglobin-related protein precursor | LPECEAVCGKPK           |
| IPI00477597       | Isoform 1 of Haptoglobin-related protein precursor | LRTEGDGVYTLNDK         |
| IPI00477597       | Isoform 1 of Haptoglobin-related protein precursor | LRTEGDGVYTLNDKK        |
| IPI00477597       | Isoform 1 of Haptoglobin-related protein precursor | VGYYVSGWGQSDNFK        |
| IPI00477597       | Isoform 1 of Haptoglobin-related protein precursor | SPVGVQPILNEHTFCVGMASK  |
| IPI00477597       | Isoform 1 of Haptoglobin-related protein precursor | AVGDKLPECEAVCGKPK      |
| IPI00478003       | A2M Alpha-2-macroglobulin precursor                | AIGYLTNGYQR            |
| IPI00478003       | A2M Alpha-2-macroglobulin precursor                | VSVQLEASPAFLAVPVEK     |
| IPI00478003       | A2M Alpha-2-macroglobulin precursor                | DTVIKPLLVEPEGLEK       |
| IPI00478003       | A2M Alpha-2-macroglobulin precursor                | TEVSSNHVLIYLDK         |
| IPI00478003       | A2M Alpha-2-macroglobulin precursor                | TEHPFTVEEFVLPK         |
| IPI00478003       | A2M Alpha-2-macroglobulin precursor                | QFSFPLSSEPFQGSYK       |
| IPI00478003       | A2M Alpha-2-macroglobulin precursor                | SLFTDLEAENDVILHCVAF    |
| IPI00478003       | A2M Alpha-2-macroglobulin precursor                | FSGQLNSHGCFYQQVK       |
| IPI00478003       | A2M Alpha-2-macroglobulin precursor                | ALLAYAFALAGNQDK        |
| IPI00478003       | A2M Alpha-2-macroglobulin precursor                | QTVSWAVTPK             |
| IPI00478003       | A2M Alpha-2-macroglobulin precursor                | KYSDASDCHGEDSQAFCEK    |
| IPI00478003       | A2M Alpha-2-macroglobulin precursor                | LVHVEPHTETVR           |
| IPI00478003       | A2M Alpha-2-macroglobulin precursor                | VDLSFSPSQSLPASHAHLR    |
| IPI00478003       | A2M Alpha-2-macroglobulin precursor                | HNVIYINGITYTPVSSSTNEK  |
| IPI00478003       | A2M Alpha-2-macroglobulin precursor                | ALLAYAFALAGNQDKR       |
| IPI00478003       | A2M Alpha-2-macroglobulin precursor                | HYDGSYSTFGER           |
| IPI00478003       | A2M Alpha-2-macroglobulin precursor                | MCPQLQQYEMHGPEGLR      |
| IPI00478003       | A2M Alpha-2-macroglobulin precursor                | KDTVIKPLLVEPEGLEK      |
| IPI00478003       | A2M Alpha-2-macroglobulin precursor                | NEDSLVFVQTDK           |
| IPI00478003       | A2M Alpha-2-macroglobulin precursor                | LLLQQVSLPELPGEYSMK     |
| IPI00478003       | A2M Alpha-2-macroglobulin precursor                | VSNQTLSSLFFTVLQDVPVR   |
| IPI00478493       | HP Protein                                         | TEGDGVYTLNNEK          |
| IPI00479708       | IGHM protein                                       | ESDWLSQSMFTCR          |
| IPI00479708       | IGHM protein                                       | NVPLPVIAELPPK          |
| IPI00479708       | IGHM protein                                       | QVGGVTTDQVQAEAK        |
| IPI00549725       | Phosphoglycerate mutase 1                          | ALPFWNEEIVPQIK         |
| IPI00549725       | Phosphoglycerate mutase 1                          | YADLTEDQLPSCESLK       |
| IPI00550069       | Ribonuclease inhibitor                             | ELDLSNNCLGDAGILQLVESVR |
| IPI00550991       | SERPINA3 Alpha-1-antichymotrypsin precursor        | AVLDVFEEGTEASAATAVK    |
| IPI00550991       | SERPINA3 Alpha-1-antichymotrypsin precursor        | ITLLSALVETR            |
| IPI00550991       | SERPINA3 Alpha-1-antichymotrypsin precursor        | LYGSEAFATDFQDSAAAK     |
| IPI00550991       | SERPINA3 Alpha-1-antichymotrypsin precursor        | NLAVSQVVHK             |
| IPI00550991       | SERPINA3 Alpha-1-antichymotrypsin precursor        | DEELSCTVVELK           |
| IPI00550991       | SERPINA3 Alpha-1-antichymotrypsin precursor        | ADLSGITGAR             |
| IPI00550991       | SERPINA3 Alpha-1-antichymotrypsin precursor        | RLYGSEAFATDFQDSAAAK    |
| IPI00550991       | SERPINA3 Alpha-1-antichymotrypsin precursor        | AKWEMPFDPQDTHQSR       |
| IPI00550991       | SERPINA3 Alpha-1-antichymotrypsin precursor        | MEEVEAMLLPETLK         |
| IPI00550991       | SERPINA3 Alpha-1-antichymotrypsin precursor        | KLINDYVK               |
| IPI00550991       | SERPINA3 Alpha-1-antichymotrypsin precursor        | MEEVEAMLLPETLKR        |
| IPI00550991       | SERPINA3 Alpha-1-antichymotrypsin precursor        | LYGSEAFATDFQDSAAAKK    |
| IPI00550991       | SERPINA3 Alpha-1-antichymotrypsin precursor        | EQLSLLDRFTEDAK         |
| IPI00552259       | Acetylcholinesterase                               | LLSATDTLDEAER          |
| IPI00552578       | Serum amyloid A protein precursor                  | FFGHGAEDSLADQAANEWGR   |
| IPI00552578       | Serum amyloid A protein precursor                  | RGPGGVWAAEAISDAR       |
| IPI00552578       | Serum amyloid A protein precursor                  | SFFSFLGEAFDGAR         |

| IPI Accession No. | Protein Description                                                               | Peptide Sequence               |
|-------------------|-----------------------------------------------------------------------------------|--------------------------------|
| IPI00552578       | Serum amyloid A protein precursor                                                 | GPGGVWAAEAIKDAR                |
| IPI00552578       | Serum amyloid A protein precursor                                                 | SGKDPNHFRAAGLPEKY              |
| IPI00553177       | SERPINA1 Isoform 1 of Alpha-1-antitrypsin precursor                               | TLNQPDSQLQLTTGNGLFLSEGLK       |
| IPI00553177       | SERPINA1 Isoform 1 of Alpha-1-antitrypsin precursor                               | LQHLENELTHDIITK                |
| IPI00553177       | SERPINA1 Isoform 1 of Alpha-1-antitrypsin precursor                               | KLSSWVLLMK                     |
| IPI00553177       | SERPINA1 Isoform 1 of Alpha-1-antitrypsin precursor                               | SASLHLPK                       |
| IPI00553177       | SERPINA1 Isoform 1 of Alpha-1-antitrypsin precursor                               | LYHSEAFVFNFGDTEEAKK            |
| IPI00553177       | SERPINA1 Isoform 1 of Alpha-1-antitrypsin precursor                               | LSSWVLLMK                      |
| IPI00553177       | SERPINA1 Isoform 1 of Alpha-1-antitrypsin precursor                               | ITPNLAEFASFSLYR                |
| IPI00553177       | SERPINA1 Isoform 1 of Alpha-1-antitrypsin precursor                               | LYHSEAFVFNFGDTEEAK             |
| IPI00553177       | SERPINA1 Isoform 1 of Alpha-1-antitrypsin precursor                               | LVDKFLEDVKK                    |
| IPI00553177       | SERPINA1 Isoform 1 of Alpha-1-antitrypsin precursor                               | LGMFNIQHCK                     |
| IPI00553177       | SERPINA1 Isoform 1 of Alpha-1-antitrypsin precursor                               | ITPNLAEFAP                     |
| IPI00553177       | SERPINA1 Isoform 1 of Alpha-1-antitrypsin precursor                               | DTEEDFHVDQVTTVK                |
| IPI00553177       | SERPINA1 Isoform 1 of Alpha-1-antitrypsin precursor                               | TLNQPDSQLQLTTG                 |
| IPI00553177       | SERPINA1 Isoform 1 of Alpha-1-antitrypsin precursor                               | YLGNAIAIFFLPDEGK               |
| IPI00553177       | SERPINA1 Isoform 1 of Alpha-1-antitrypsin precursor                               | KLYHSEAFVFNFGDTEEAK            |
| IPI00553177       | SERPINA1 Isoform 1 of Alpha-1-antitrypsin precursor                               | TLNQPDSQLQL                    |
| IPI00641737       | HP Haptoglobin precursor                                                          | AVGDKLPECEADDGCPKPEIAHGYVEHSVR |
| IPI00641737       | HP Haptoglobin precursor                                                          | LPECEADDGCPKPEIAHGYVEHSVR      |
| IPI00643920       | Transketolase                                                                     | SVPTSTVFYPSDGVATEK             |
| IPI00643920       | Transketolase                                                                     | VLDPFITIKPLDR                  |
| IPI00654755       | HBB Hemoglobin subunit beta                                                       | VNVDEVGGEALGR                  |
| IPI00654755       | HBB Hemoglobin subunit beta                                                       | EFTPPVQAAYQK                   |
| IPI00654755       | HBB Hemoglobin subunit beta                                                       | FFESFGDLSTPDVAVMGNPK           |
| IPI00654755       | HBB Hemoglobin subunit beta                                                       | GTFATLSELHCDK                  |
| IPI00654755       | HBB Hemoglobin subunit beta                                                       | GTFATLSELHCDKLVDPENFR          |
| IPI00654755       | HBB Hemoglobin subunit beta                                                       | LLGNVLCVLAH                    |
| IPI00654755       | HBB Hemoglobin subunit beta                                                       | GTFATLSELHCDKLVHD              |
| IPI00656087       | Isoform 1 of Tyrosine-protein phosphatase non-receptor type substrate 1 precursor | VPPTLEVTTQQPVR                 |
| IPI00656087       | Isoform 1 of Tyrosine-protein phosphatase non-receptor type substrate 1 precursor | CTATSLIPVGPQWFR                |
| IPI00656087       | Isoform 1 of Tyrosine-protein phosphatase non-receptor type substrate 1 precursor | SVLVAAGETATLR                  |
| IPI00656087       | Isoform 1 of Tyrosine-protein phosphatase non-receptor type substrate 1 precursor | IGNITPADAGTYCYVK               |
| IPI00656087       | Isoform 1 of Tyrosine-protein phosphatase non-receptor type substrate 1 precursor | QPAPKPEPSFSEYASVQVPR           |
| IPI00657648       | Ependymin related protein 1 precursor                                             | SYETWIGIYTVK                   |
| IPI00657922       | Leucine-rich repeat kinase 2                                                      | KAEEGDLLVNPDPQR                |
| IPI00657922       | Leucine-rich repeat kinase 2                                                      | AAAYEGEEVAVK                   |
| IPI00746356       | Nitric oxide synthase, brain                                                      | QPDGSTLGDPANVQFTEEVAK          |
| IPI00748312       | Protein tyrosine phosphatase, receptor-type, zeta1 precursor                      | VVYDTMIEK                      |
| IPI00748312       | Protein tyrosine phosphatase, receptor-type, zeta1 precursor                      | TSLENTFIHNTGK                  |
| IPI00748312       | Protein tyrosine phosphatase, receptor-type, zeta1 precursor                      | FSSFEEAVK                      |
| IPI00748312       | Protein tyrosine phosphatase, receptor-type, zeta1 precursor                      | QSPINIDEDLTQVNVNLKK            |
| IPI00748312       | Protein tyrosine phosphatase, receptor-type, zeta1 precursor                      | FAVLYQQLDGEDQTK                |
| IPI00783862       | Flavin reductase (NADPH)                                                          | TVAGQDAVIVLLGTR                |
| IPI00783862       | Flavin reductase (NADPH)                                                          | NDSLPTVMSEGAR                  |
| IPI00783987       | C3 Complement C3 precursor (Fragment)                                             | VPVAVQGEDTVQSLTQGDGVAK         |
| IPI00783987       | C3 Complement C3 precursor (Fragment)                                             | SGIPIVTSPIYQIHF                |
| IPI00783987       | C3 Complement C3 precursor (Fragment)                                             | AGDFLEANYMNLQR                 |
| IPI00783987       | C3 Complement C3 precursor (Fragment)                                             | SSLSPYVIVPLK                   |
| IPI00783987       | C3 Complement C3 precursor (Fragment)                                             | QPSSAFAAFVK                    |
| IPI00783987       | C3 Complement C3 precursor (Fragment)                                             | DICEEQVNSLPGSITK               |
| IPI00783987       | C3 Complement C3 precursor (Fragment)                                             | APSTWLTAIVVK                   |
| IPI00783987       | C3 Complement C3 precursor (Fragment)                                             | IHWESASLLR                     |
| IPI00783987       | C3 Complement C3 precursor (Fragment)                                             | HQQTVTIPPK                     |
| IPI00783987       | C3 Complement C3 precursor (Fragment)                                             | AAVYHHFISDGVR                  |

| IPI Accession No. | Protein Description                                | Peptide Sequence          |
|-------------------|----------------------------------------------------|---------------------------|
| IPI00783987       | C3 Complement C3 precursor (Fragment)              | TELRPGETLNVNFLLR          |
| IPI00783987       | C3 Complement C3 precursor (Fragment)              | KGYTQQLAFR                |
| IPI00783987       | C3 Complement C3 precursor (Fragment)              | SGQSEDRQPVPQQMTLK         |
| IPI00783987       | C3 Complement C3 precursor (Fragment)              | GYTQQLAFR                 |
| IPI00783987       | C3 Complement C3 precursor (Fragment)              | VELLHNPAFCSLATTK          |
| IPI00783987       | C3 Complement C3 precursor (Fragment)              | VRVELLHNPAFCSLATTK        |
| IPI00783987       | C3 Complement C3 precursor (Fragment)              | TGLQEVEVK                 |
| IPI00783987       | C3 Complement C3 precursor (Fragment)              | AKDQLTCNKFDLK             |
| IPI00783987       | C3 Complement C3 precursor (Fragment)              | SEETKENEGFTVTAEGK         |
| IPI00783987       | C3 Complement C3 precursor (Fragment)              | SYTVAIAGYALAQMGR          |
| IPI00783987       | C3 Complement C3 precursor (Fragment)              | DSITTWEILAVSMSDKK         |
| IPI00783987       | C3 Complement C3 precursor (Fragment)              | ILLQGTPVAQMTEDAVDAER      |
| IPI00783987       | C3 Complement C3 precursor (Fragment)              | DFDFVPPVVR                |
| IPI00783987       | C3 Complement C3 precursor (Fragment)              | DSCVGSLLVVK               |
| IPI00784119       | ATP6AP1 Vacuolar ATP synthase subunit S1 precursor | SEDVPYTAALTAVRPSR         |
| IPI00784119       | ATP6AP1 Vacuolar ATP synthase subunit S1 precursor | EVLTGNDEVIGQVLSTLK        |
| IPI00784119       | ATP6AP1 Vacuolar ATP synthase subunit S1 precursor | LSIEDFTAYGGVFGNK          |
| IPI00784119       | ATP6AP1 Vacuolar ATP synthase subunit S1 precursor | LGASPLHVDLATLR            |
| IPI00784119       | ATP6AP1 Vacuolar ATP synthase subunit S1 precursor | LPYTASSGLMAPR             |
| IPI00787853       | Inositol monophosphatase 3                         | VLALLDVPDKSQEK            |
| IPI00798154       | Isoform 3 of D(3) dopamine receptor                | NSLMPLREK                 |
| IPI00853369       | Complement component 6 precursor                   | GNIFLTSYQYPFYDCR          |
| IPI00853369       | Complement component 6 precursor                   | LPVQECLSYPTCTQCR          |
| IPI00879709       | Complement component 6 precursor                   | GEVLDNSFTGGICK            |
| IPI00879709       | Complement component 6 precursor                   | IGESIELTCPK               |
| IPI00879709       | Complement component 6 precursor                   | ALNHLPLEYNSALYSR          |
| IPI00879709       | Complement component 6 precursor                   | DLHLSDVFLK                |
| IPI00879709       | Complement component 6 precursor                   | TLNICEVGTIR               |
| IPI00879709       | Complement component 6 precursor                   | ENPAVIDFELAPIVDLVR        |
| IPI00879709       | Complement component 6 precursor                   | TECIKPVVQEVLTITPF         |
| IPI00879709       | Complement component 6 precursor                   | AKDLHLSDVFLK              |
| IPI00879709       | Complement component 6 precursor                   | ESCGYDTCYDWEK             |
| IPI00879709       | Complement component 6 precursor                   | CPINCLLGDFGPWSDCDPCIEK    |
| IPI00879709       | Complement component 6 precursor                   | LSEKHEGSFIQGAEK           |
| IPI00879709       | Complement component 6 precursor                   | CLNNQQLHFLHIGSCQDGR       |
| IPI00879709       | Complement component 6 precursor                   | VPANLENVGFVEVQTAEDDLKTDYK |
| IPI00880012       | F-box only protein 7                               | QSLLECTWGYR               |
