# Supplementary material
Source: PubMed Central journal article supplement (PMC4349976)
Supplement: supp_M114.040576_mcp.M114.040576-4.pdf [file supp_M114.040576_mcp.M114.040576-4.pdf]

| IPi Accession No. | UniProt Accession No. | Gene Symbol | Protein Description                                      | Peptide Sequence        | Inclusion Status | Heavy Peptide Spike (fmol) | IPA for Neurological Disorder | GeneCard Rank <sup>†</sup> |
|-------------------|-----------------------|-------------|----------------------------------------------------------|-------------------------|------------------|----------------------------|-------------------------------|----------------------------|
| IP00746356        | P20475                | NOS1        | Nitric oxide synthase, brain                             | QPDGSLGDPANVFTEEVAK     |                  |                            | No                            | 224                        |
| IP00021000        | P10451                | SPP1        | Osteopontin                                              | AIPVAQDLNAPSDWDSR       | **               | 125                        | Yes                           | 819                        |
| IP00021000        | P10451                | SPP1        | Osteopontin                                              | YPDAAVATWLNFPDPSQK      | *                | 125                        | Yes                           | 819                        |
| IP00470427        | D3K2X0                | PARK2       | Parkin variant SV5.9DEL                                  | VTCGGGMLGCGVQRKTK       |                  |                            | No                            | 1                          |
| IP00470427        | O60260                | PARK2       | Parkin protein 2, E3 ubiquitin protein ligase (parkin)   | FNSSHGPFVVEVSDSITSIQFLK |                  |                            | No                            | 1                          |
| IP00219703        | P20472                | PVALB       | Parvalbumin alpha                                        | SGFIEEDLGFLLK           | *                | 12500                      | No                            | 84                         |
| IP00027350        | P32119                | PEROXD2     | Peroxisidoxin-2                                          | EGGLGPLNPLLADVTR        | *                | 12500                      | Yes                           | 569                        |
| IP00027350        | P32119                | PEROXD2     | Peroxisidoxin-2                                          | ATAVVVDGAFK             | **               | 125                        | Yes                           | 569                        |
| IP00219446        | P30086                | PEBP1       | Phosphatidylethanolamine-binding protein 1               | NRPTSSWDLDSGK           | *                | 125                        | Yes                           |                            |
| IP00219446        | P30086                | PEBP1       | Phosphatidylethanolamine-binding protein 1               | LYTLVLTDPDAPSRK         | **               | 125                        | Yes                           |                            |
| IP00177535        | Q9NQ11                | ATP13A2     | Probable cation-transporting ATPase 13A2                 | DTVEGLSLLLGLVMR         |                  |                            | No                            | 6                          |
| IP00177535        | Q9NQ11                | ATP13A2     | Probable cation-transporting ATPase 13A2                 | SQAAGVAVPEGAWK          |                  |                            | No                            | 6                          |
| IP00000828        | P01210                | PENK        | Proenkephalin-A                                          | LVRPADINFLACVMECEGK     |                  |                            | Yes                           | 77                         |
| IP00000828        | P01210                | PENK        | Proenkephalin-A                                          | FAELASDEEGESYSK         |                  |                            | Yes                           | 77                         |
| IP00000832        | P01213                | PDYN        | Proenkephalin-B                                          | SVGEGPYSELAQ            | *                | 125                        | No                            | 82                         |
| IP00020557        | Q07954                | LRP1        | Protein density lipoprotein receptor-related protein 1   | SERPPFEIR               | **               | 125                        | Yes                           | 792                        |
| IP00020557        | Q07954                | LRP1        | Protein density lipoprotein receptor-related protein 1   | AALSGANVLTLEK           | **               | 125                        | Yes                           | 792                        |
| IP00020557        | Q07954                | LRP1        | Protein density lipoprotein receptor-related protein 1   | ILGASADSEGVAAAPR        | **               | 125                        | Yes                           | 792                        |
| IP00002280        | Q9UHG2                | PCSK1N      | ProSAAS                                                  | LDPAALAAQLVPAFPVPAALR   | *                | 125                        | Yes                           | 299                        |
| IP00002280        | Q9UHG2                | PCSK1N      | ProSAAS                                                  | TVVGSADLFYVWR           | **               | 125                        | Yes                           | 299                        |
| IP00006166        | O15354                | GPR37       | Prostaglandin G/EP synthase 3                            | GNPTALQLFLQISEEKEGPR    | **               | 125                        | No                            | 62                         |
| IP00006166        | O15354                | GPR37       | Prostaglandin G/EP synthase 3                            | TMLLQPGASLGSYSYR        | *                | 1.25                       | Yes                           | 62                         |
| IP00013179        | P41222                | PTGDS       | Prostaglandin-H2 D-isomerase                             | AQGTEDTIVFLPQTDK        | *                | 1.25                       | Yes                           | 1153                       |
| IP00013179        | P41222                | PTGDS       | Prostaglandin-H2 D-isomerase                             | DVVICDASLEDAK           | *                | 1.25                       | Yes                           | 1153                       |
| IP00298547        | Q99497                | PARK7       | Protein DJ-1                                             | GAEMETVIVPDMVR          | *                | 125                        | Yes                           | 3                          |
| IP00298547        | Q99497                | PARK7       | Protein DJ-1                                             | NGDGEVSEEFQVLVK         | *                | 125                        | Yes                           | 3                          |
| IP00303002        | P29377                | S100G       | Protein S100-G                                           | TPAQYDASELK             | *                | 125                        | No                            | 119                        |
| IP00334627        | AGNMY6                | ANXA2P2     | Putative annexin A2-like protein                         | GVDEVTVNIVTNR           | *                | 125                        | Yes                           |                            |
| IP00334627        | AGNMY6                | ANXA2P2     | Putative annexin A2-like protein                         | FSYSDSISIVYAK           | *                | 125                        | Yes                           |                            |
| IP00241562        | P78509                | RELN        | Reelin                                                   | VPSLVSVVINEPLOTATK      | *                | 125                        | Yes                           |                            |
| IP00241562        | P78509                | RELN        | Reelin                                                   | GEAGAPVEDIQGPTK         | *                | 125                        | Yes                           | 624                        |
| IP00006601        | P05060                | CHGB        | Secretogranin-1                                          | GYPGVQAPDELEWER         | *                | 125                        | Yes                           | 624                        |
| IP00006601        | P05060                | CHGB        | Secretogranin-1                                          | EPLPTLPLGR              | *                | 125                        | No                            | 66                         |
| IP00001663        | O43464                | HTRA2       | Serine protease HTRA2, mitochondrial                     | DYELLCLGTR              | *                | 125                        | Yes                           | 726                        |
| IP00022463        | P02787                | TF          | Serotransferrin                                          | SAGWNIPQLLYCDLPEPR      | *                | 125                        | Yes                           | 726                        |
| IP00022463        | P02787                | TF          | Serotransferrin                                          | GGTWELQAPAFYTGGEK       | *                | 125                        | Yes                           | 662                        |
| IP00022463        | P02787                | TF          | Serotransferrin                                          | SDDFGQTWIMIQEHVK        | *                | 125                        | Yes                           | 662                        |
| IP00022608        | Q92673                | SORL1       | Sortilin-related receptor                                | SHPTCTDEVIQFPLR         | *                | 125                        | Yes                           |                            |
| IP00022608        | Q92673                | SORL1       | Sortilin-related receptor                                | LLAGDIPIDLLK            | *                | 125                        | Yes                           |                            |
| IP00296777        | Q14515                | SPARCL1     | SPARC-like protein 1                                     | VEGDDPDEYKGTISYR        | *                | 125                        | Yes                           |                            |
| IP00296777        | Q14515                | SPARCL1     | SPARC-like protein 1                                     | AAPSAEFSVDR             | *                | 125                        | Yes                           |                            |
| IP00171473        | Q9HCB6                | SPON1       | Spondin-1                                                | GDVTAQIALQPAK           | *                | 125                        | Yes                           | 90                         |
| IP00171473        | Q9HCB6                | SPON1       | Spondin-1                                                | HHAAYVNNLNVTTEK         | *                | 12500                      | Yes                           | 90                         |
| IP00171473        | Q9HCB6                | SPON1       | Spondin-1                                                | LLLENVGVGLLFASK         | *                | 12500                      | No                            | 109                        |
| IP00022314        | P04179                | SOD2        | Superoxide dismutase [Mn], mitochondrial                 | GSPAINVAHVYR            | *                | 1.25                       | Yes                           | 252                        |
| IP00022314        | P04179                | SOD2        | Superoxide dismutase [Mn], mitochondrial                 | KAADDTWEPFASGK          | *                | 1.25                       | Yes                           | 252                        |
| IP00022314        | P04179                | SOD2        | Superoxide dismutase [Mn], mitochondrial                 | QDILDDSGVVSAYK          | *                | 125                        | No                            | 111                        |
| IP00016759        | Q05940                | SLC18A2     | Synaptic vesicular amine transporter                     | NEAQAAHDVAQEGQQR        | *                | 12500                      | No                            | 8                          |
| IP00022432        | P02766                | TTR         | Transferrin                                              | LGVAGQWR                | *                | 1.25                       | Yes                           | 56                         |
| IP00022432        | P02766                | TTR         | Transferrin                                              | ESTLHLVLR               | *                | 1.25                       | Yes                           | 56                         |
| IP00306413        | Q9BW30                | PPP3        | Tubulin polymerization-promoting protein family member 3 | TTLEVEPDSITENVK         | **               | 125                        | No                            | 56                         |
| IP00018352        | P09936                | UCHL1       | Ubiquitin carboxyl-terminal hydrolase isozyme L1         | LATVGELOAAWR            | *                | 125                        | Yes                           | 660                        |
| IP00018352        | P09936                | UCHL1       | Ubiquitin carboxyl-terminal hydrolase isozyme L1         | LQGAHLTSLSHHEEQMFVNR    | *                | 125                        | Yes                           | 660                        |
| IP00179330        | P62979                | RPS27A      | Ubiquitin-40S ribosomal protein S27a                     | GYQDASTKIR              | *                | 125                        | No                            | 45                         |
| IP00179330        | P62979                | RPS27A      | Ubiquitin-40S ribosomal protein S27a                     |                         |                  |                            |                               |                            |
| IP00009802        | P13611                | VCAN        | Versican core protein                                    |                         |                  |                            |                               |                            |
| IP00009802        | P13611                | VCAN        | Versican core protein                                    |                         |                  |                            |                               |                            |
| IP00009802        | P13611                | VCAN        | Versican core protein                                    |                         |                  |                            |                               |                            |
| IP00000012        | B4DGLU0               | SLC30A10    | Zinc transporter 10                                      |                         |                  |                            |                               |                            |

\* Included in the optimized 126-plex SRM assay tested in the Training set.

\*\* Included in 17-plex SRM assay tested in the Validation set.

† Whether proteins are involved in pathways affected in "Neurological Disorders" based on Ingenuity Pathway Analysis (IPA). \*\*\* Known to be implied in PD and neurodegeneration based on literature search.

‡ Rank of PD relevance of 1,419 proteins based on search on geneCards.org with a keyword of "Parkinson disease" (conducted in April 2013).
